# Supplementary material for: Active Oxidative Metabolism and Impaired Glyoxalase System Under Increased Intracellular Oxidative Stress in Non-Small Cell Lung Cancer
Source: Research Square preprint supplement (doi:10.21203/rs.3.rs-4535848/v1), 2024-06-19
Supplement: Supplementary file 1 [file 2eee97a48c65eeff882192ee.xlsx]

## Sheet: processed data
Significant (FDR corrected)	Significant (no FDR correction)	negative log FDR corrected p-value	negative log p-value	log2 FC Healthy to Tumor	Protein ID	Protein names	Gene names	Cysteine position	GOBP	GOMF	GOCC	Modified Peptide	Peptide Length	Charges	Label Count	Light Modified Peptide	Heavy Modified Peptide	Amino Acid	10H Log2 L/H ratio	10T Log2 L/H ratio	11H Log2 L/H ratio	11T Log2 L/H ratio	12H Log2 L/H ratio	12T Log2 L/H ratio	13H Log2 L/H ratio	13T Log2 L/H ratio	14H Log2 L/H ratio	14T Log2 L/H ratio	15H Log2 L/H ratio	15T Log2 L/H ratio	16H Log2 L/H ratio	16T Log2 L/H ratio	17H Log2 L/H ratio	17T Log2 L/H ratio	18H Log2 L/H ratio	18T Log2 L/H ratio	19H Log2 L/H ratio	19T Log2 L/H ratio	1H Log2 L/H ratio	1T Log2 L/H ratio	20H Log2 L/H ratio	20T Log2 L/H ratio	21H Log2 L/H ratio	21T Log2 L/H ratio	22H Log2 L/H ratio	22T Log2 L/H ratio	23H Log2 L/H ratio	23T Log2 L/H ratio	24H Log2 L/H ratio
+	+	0.0374049	2.28103	1.81022	P35611	Alpha-adducin	ADD1	525	GO:0000902;GO:0001701;GO:0001894;GO:0006810;GO:0006884;GO:0006915;GO:0006921;GO:0006950;GO:0006984;GO:0006986;GO:0006996;GO:0007010;GO:0007015;GO:0007154;GO:0007165;GO:0007584;GO:0008064;GO:0008152;GO:0008219;GO:0009605;GO:0009653;GO:0009790;GO:0009792;GO:0009987;GO:0009991;GO:0010033;GO:0010639;GO:0012501;GO:0016043;GO:0016265;GO:0019538;GO:0019725;GO:0020027;GO:0022411;GO:0022603;GO:0022607;GO:…	GO:0003779;GO:0005198;GO:0005488;GO:0005515;GO:0008092;GO:0008134;GO:0030507;GO:0042802;GO:0042803;GO:0046982;GO:0046983;GO:0051015	GO:0005634;GO:0005654;GO:0005829;GO:0005856;GO:0005886;GO:0005912;GO:0005924;GO:0005925;GO:0008290;GO:0014069;GO:0016020;GO:0030054;GO:0030055;GO:0032991;GO:0042995;GO:0043005;GO:0043197;GO:0043226;GO:0043227;GO:0043228;GO:0043229;GO:0043231;GO:0043232;GO:0043234;GO:0044309;GO:0044422;GO:0044424;GO:0044428;GO:0044430;GO:0044444;GO:0044446;GO:0044456;GO:0044463;GO:0044464;GO:0045111;GO:0048471;GO:…	TAGPQSQVLCGVVMDR	16	2	1	TAGPQSQVLC[125.0477]GVVMDR	TAGPQSQVLC[130.0791]GVVMDR	C	0.0119535	NaN	-0.314096	NaN	-1.94548	-0.451569	-0.647972	0.285335	NaN	NaN	-0.490102	-6.83951	NaN	NaN	0.491311	NaN	-0.322071	-6.56756	-0.506584	NaN	NaN	0.296644	NaN	-1.34662	-0.740614	NaN	-0.171906	NaN	-0.608058	-0.784639	-0.577378
+	+	0.00273418	3.64224	1.77953	P04083	Annexin A1	ANXA1	270	GO:0000302;GO:0001775;GO:0001780;GO:0001817;GO:0002262;GO:0002376;GO:0002521;GO:0002682;GO:0002790;GO:0003006;GO:0006139;GO:0006259;GO:0006464;GO:0006807;GO:0006810;GO:0006869;GO:0006928;GO:0006950;GO:0006952;GO:0006954;GO:0006979;GO:0007165;GO:0007166;GO:0008152;GO:0009314;GO:0009611;GO:0009628;GO:0009719;GO:0009725;GO:0009889;GO:0009891;GO:0009893;GO:0009913;GO:0009914;GO:0009987;GO:0010033;GO:…	GO:0003676;GO:0003677;GO:0003697;GO:0003723;GO:0003727;GO:0003824;GO:0004386;GO:0004857;GO:0004859;GO:0005102;GO:0005198;GO:0005488;GO:0005509;GO:0005515;GO:0005543;GO:0005544;GO:0008094;GO:0008289;GO:0016462;GO:0016787;GO:0016817;GO:0016818;GO:0016887;GO:0017111;GO:0019834;GO:0030234;GO:0030674;GO:0033676;GO:0042623;GO:0043167;GO:0043169;GO:0043566;GO:0046872;GO:0048306;GO:0055102;GO:0060090	GO:0000323;GO:0001533;GO:0005576;GO:0005615;GO:0005634;GO:0005737;GO:0005764;GO:0005768;GO:0005773;GO:0005856;GO:0005886;GO:0005912;GO:0005924;GO:0005925;GO:0005929;GO:0009986;GO:0016020;GO:0016323;GO:0030054;GO:0030055;GO:0031090;GO:0031966;GO:0031982;GO:0031988;GO:0032991;GO:0042383;GO:0042629;GO:0042995;GO:0043226;GO:0043227;GO:0043228;GO:0043229;GO:0043230;GO:0043231;GO:0043232;GO:0043234;GO:…	CATSKPAFFAEK	12	2;3	1	C[125.0477]ATSKPAFFAEK	C[130.0791]ATSKPAFFAEK	C	1.01081	1.26998	NaN	-1.46209	NaN	NaN	7.66651	0.575767	NaN	-1.44686	NaN	1.17222	1.80527	1.83034	NaN	NaN	NaN	1.66416	7.13831	NaN	NaN	-0.544802	NaN	NaN	NaN	2.35829	NaN	NaN	NaN	NaN	NaN
+	+	0.00753982	3.15001	1.75304	Q9Y3B3	Transmembrane emp24 domain-containing protein 7	TMED7	151	GO:0006810;GO:0015031;GO:0045184;GO:0051234		GO:0005783;GO:0005789;GO:0005793;GO:0005794;GO:0016020;GO:0016021;GO:0030117;GO:0030120;GO:0030126;GO:0030127;GO:0031090;GO:0031224;GO:0031982;GO:0031988;GO:0032991;GO:0033116;GO:0043226;GO:0043227;GO:0043229;GO:0043230;GO:0043231;GO:0043234;GO:0044421;GO:0044422;GO:0044424;GO:0044425;GO:0044431;GO:0044432;GO:0044433;GO:0044444;GO:0044446;GO:0044464;GO:0065010;GO:0070062	VSALTQMESACVSIHEALK	19	3	1	VSALTQMESAC[125.0477]VSIHEALK	VSALTQMESAC[130.0791]VSIHEALK	C	7.54864	4.39888	NaN	NaN	NaN	NaN	NaN	NaN	NaN	0.0270098	NaN	0.176012	1.18171	NaN	NaN	-0.666855	1.12276	-0.462403	4.7724	-0.541286	NaN	NaN	4.65734	-0.360098	1.67376	NaN	NaN	4.07435	1.70287	NaN	0.426987
	+	0.0782178	1.82114	1.73356	P50991	T-complex protein 1 subunit delta	CCT4	221	GO:0006457;GO:0006458;GO:0007339;GO:0008037;GO:0008152;GO:0009987;GO:0009988;GO:0019538;GO:0022414;GO:0035036;GO:0043170;GO:0044237;GO:0044238;GO:0044260;GO:0044267;GO:0048610;GO:0051084	GO:0000166;GO:0005488;GO:0005515;GO:0005524;GO:0017076;GO:0030554;GO:0032553;GO:0032555;GO:0032559;GO:0035639;GO:0051082	GO:0005654;GO:0005737;GO:0005813;GO:0005815;GO:0005829;GO:0005832;GO:0005874;GO:0016023;GO:0031410;GO:0031982;GO:0031988;GO:0032991;GO:0042470;GO:0043226;GO:0043227;GO:0043228;GO:0043229;GO:0043230;GO:0043231;GO:0043232;GO:0043234;GO:0044297;GO:0044421;GO:0044422;GO:0044424;GO:0044428;GO:0044430;GO:0044444;GO:0044445;GO:0044446;GO:0044464;GO:0048770;GO:0065010;GO:0070062	KLGGTIDDCELVEGLVLTQK	20	2;3	1	KLGGTIDDC[125.0477]ELVEGLVLTQK	KLGGTIDDC[130.0791]ELVEGLVLTQK	C	7.90334	NaN	NaN	NaN	NaN	5.89312	NaN	1.69623	NaN	NaN	NaN	6.05404	1.21637	3.67861	6.76408	1.92191	1.75599	4.39703	NaN	NaN	NaN	NaN	NaN	NaN	NaN	1.90914	1.45281	NaN	8.60593	NaN	NaN
+	+	0.00230769	3.70455	1.58079	P11678	Eosinophil peroxidase	EPX	676	GO:0000302;GO:0001817;GO:0001818;GO:0001819;GO:0002215;GO:0002376;GO:0006928;GO:0006950;GO:0006952;GO:0006979;GO:0008152;GO:0009056;GO:0009607;GO:0009624;GO:0009987;GO:0010035;GO:0016477;GO:0032653;GO:0032673;GO:0032674;GO:0032693;GO:0032714;GO:0032753;GO:0033554;GO:0034599;GO:0034614;GO:0040011;GO:0042221;GO:0042542;GO:0042743;GO:0042744;GO:0044237;GO:0044248;GO:0048518;GO:0048519;GO:0048870;GO:…	GO:0003824;GO:0004601;GO:0005488;GO:0005506;GO:0016209;GO:0016491;GO:0016684;GO:0020037;GO:0043167;GO:0043169;GO:0046872;GO:0046906;GO:0046914	GO:0031982;GO:0031988;GO:0043226;GO:0043227;GO:0043230;GO:0044421;GO:0065010;GO:0070062	IICDNTGITTVSR	13	2	1	IIC[125.0477]DNTGITTVSR	IIC[130.0791]DNTGITTVSR	C	NaN	NaN	0.441016	NaN	NaN	1.49588	3.20167	1.54092	3.11728	NaN	3.27715	NaN	-0.357821	-0.405036	2.23012	-0.684442	0.617994	-0.728088	1.73982	NaN	NaN	NaN	NaN	NaN	1.11307	-2.59875	NaN	NaN	NaN	3.59532	-1.69718
+	+	0.00775862	3.12477	1.40362	P13987	CD59 glycoprotein	CD59	70	GO:0001775;GO:0001969;GO:0001971;GO:0002376;GO:0002673;GO:0002682;GO:0002683;GO:0002684;GO:0002694;GO:0002696;GO:0002697;GO:0002698;GO:0002920;GO:0002921;GO:0006950;GO:0006952;GO:0006955;GO:0007165;GO:0007166;GO:0007596;GO:0007599;GO:0008284;GO:0009892;GO:0009987;GO:0010468;GO:0010605;GO:0010941;GO:0010955;GO:0019222;GO:0030449;GO:0031347;GO:0032101;GO:0032501;GO:0032944;GO:0032946;GO:0042102;GO:…	GO:0001848;GO:0005488;GO:0005515	GO:0005576;GO:0005615;GO:0005886;GO:0005912;GO:0005924;GO:0005925;GO:0009986;GO:0016020;GO:0030054;GO:0030055;GO:0031224;GO:0031225;GO:0031226;GO:0031233;GO:0031362;GO:0031982;GO:0031988;GO:0042383;GO:0043218;GO:0043226;GO:0043227;GO:0043230;GO:0044421;GO:0044425;GO:0044459;GO:0044464;GO:0046658;GO:0065010;GO:0070062;GO:0070161	FEHCNFNDVTTR	12	2	1	FEHC[125.0477]NFNDVTTR	FEHC[130.0791]NFNDVTTR	C	-0.627738	-3.50652	NaN	-1.26313	0.427576	NaN	NaN	NaN	NaN	-3.48084	NaN	NaN	NaN	-3.21613	0.538556	-5.78242	NaN	NaN	NaN	NaN	-1.27304	-0.0447421	-0.451704	NaN	NaN	NaN	NaN	-3.45778	NaN	NaN	NaN
	+	0.104055	1.62911	1.36333	P00558	Phosphoglycerate kinase 1	PGK1	367;379;380	GO:0005975;GO:0005996;GO:0006006;GO:0006066;GO:0006094;GO:0006793;GO:0006796;GO:0008152;GO:0009058;GO:0009987;GO:0016051;GO:0016310;GO:0019318;GO:0019319;GO:0030154;GO:0030855;GO:0032502;GO:0034637;GO:0044237;GO:0044238;GO:0044249;GO:0044262;GO:0044281;GO:0044283;GO:0046165;GO:0046364;GO:0048869	GO:0000166;GO:0003824;GO:0004618;GO:0005488;GO:0005524;GO:0016301;GO:0016740;GO:0016772;GO:0016774;GO:0017076;GO:0030554;GO:0032553;GO:0032555;GO:0032559;GO:0035639	GO:0005829;GO:0016020;GO:0031982;GO:0031988;GO:0043226;GO:0043227;GO:0043230;GO:0044421;GO:0044424;GO:0044425;GO:0044444;GO:0044464;GO:0045121;GO:0065010;GO:0070062	GCITIIGGGDTATCCAK	17	2	3	GC[125.0477]ITIIGGGDTATC[125.0477]C[125.0477]AK	GC[130.0791]ITIIGGGDTATC[130.0791]C[130.0791]AK	C;C;C	NaN	-4.69081	NaN	NaN	NaN	NaN	NaN	NaN	NaN	0.852916	1.057	0.793039	-0.267607	-3.76051	1.54793	0.409667	1.01626	0.882716	NaN	NaN	NaN	NaN	NaN	0.860259	NaN	NaN	NaN	-1.87387	0.874546	NaN	NaN
+	+	0.0422703	2.19385	1.35277	P07900	Heat shock protein HSP 90-alpha	HSP90AA1	572	GO:0000086;GO:0000278;GO:0001764;GO:0002376;GO:0003008;GO:0003009;GO:0003012;GO:0006457;GO:0006461;GO:0006605;GO:0006612;GO:0006626;GO:0006807;GO:0006810;GO:0006839;GO:0006886;GO:0006897;GO:0006898;GO:0006915;GO:0006928;GO:0006935;GO:0006936;GO:0006937;GO:0006941;GO:0006942;GO:0006950;GO:0006952;GO:0006955;GO:0006970;GO:0006986;GO:0006996;GO:0007005;GO:0007006;GO:0007008;GO:0007049;GO:0007165;GO:…	GO:0000166;GO:0002134;GO:0002135;GO:0003676;GO:0003723;GO:0003729;GO:0003823;GO:0003824;GO:0005488;GO:0005515;GO:0005524;GO:0005525;GO:0016462;GO:0016787;GO:0016817;GO:0016818;GO:0016887;GO:0017076;GO:0017111;GO:0019001;GO:0019103;GO:0019899;GO:0019904;GO:0023023;GO:0023026;GO:0030234;GO:0030235;GO:0030554;GO:0030911;GO:0032552;GO:0032553;GO:0032554;GO:0032555;GO:0032557;GO:0032558;GO:0032559;GO:…	GO:0005576;GO:0005634;GO:0005654;GO:0005737;GO:0005739;GO:0005829;GO:0005886;GO:0009986;GO:0016020;GO:0016023;GO:0016323;GO:0016324;GO:0031012;GO:0031253;GO:0031410;GO:0031526;GO:0031974;GO:0031982;GO:0031983;GO:0031988;GO:0032991;GO:0042470;GO:0042995;GO:0043005;GO:0043025;GO:0043226;GO:0043227;GO:0043229;GO:0043230;GO:0043231;GO:0043233;GO:0043234;GO:0044297;GO:0044421;GO:0044422;GO:0044424;GO:…	KTKFENLCK	9	2	1	KTKFENLC[125.0477]K	KTKFENLC[130.0791]K	C	0.509932	NaN	2.84577	NaN	NaN	2.49318	NaN	-2.99621	2.51724	NaN	2.48082	2.21459	NaN	0.216652	NaN	NaN	NaN	4.18931	3.04379	NaN	NaN	NaN	NaN	NaN	1.83691	4.18475	3.52258	4.3001	NaN	NaN	5.89263
+	+	0	6.67184	1.35045	P15880	40S ribosomal protein S2	RPS2	222	GO:0000184;GO:0000956;GO:0006139;GO:0006401;GO:0006402;GO:0006412;GO:0006413;GO:0006414;GO:0006415;GO:0006605;GO:0006612;GO:0006613;GO:0006614;GO:0006807;GO:0006810;GO:0006886;GO:0008152;GO:0009056;GO:0009057;GO:0009058;GO:0009059;GO:0009987;GO:0010467;GO:0015031;GO:0016032;GO:0016043;GO:0016070;GO:0016071;GO:0019058;GO:0019083;GO:0019222;GO:0019538;GO:0022411;GO:0022414;GO:0022415;GO:0032774;GO:…	GO:0003676;GO:0003723;GO:0003729;GO:0003735;GO:0005198;GO:0005488;GO:0005515;GO:0017134;GO:0019838;GO:0019899	GO:0005634;GO:0005654;GO:0005737;GO:0005829;GO:0005912;GO:0005924;GO:0005925;GO:0015935;GO:0016020;GO:0022627;GO:0030054;GO:0030055;GO:0030529;GO:0031982;GO:0031988;GO:0032991;GO:0043226;GO:0043227;GO:0043229;GO:0043230;GO:0043231;GO:0044421;GO:0044422;GO:0044424;GO:0044428;GO:0044444;GO:0044446;GO:0044464;GO:0065010;GO:0070062;GO:0070161	KLLMMAGIDDCYTSAR	16	2;3	1	KLLMMAGIDDC[125.0477]YTSAR	KLLMMAGIDDC[130.0791]YTSAR	C	2.4751	NaN	1.13083	NaN	2.16234	1.25046	2.28809	1.6011	NaN	1.75904	1.6112	NaN	-1.31642	-0.886528	-0.888517	-1.48272	1.71656	-0.689441	-1.04441	NaN	NaN	-0.741027	0.772915	NaN	1.15185	-2.61124	-1.14043	-0.50153	-1.44847	1.42455	0.858186
+	+	0.000222222	4.73003	1.34361	P07339	Cathepsin D	CTSD	338	GO:0002376;GO:0002478;GO:0002495;GO:0002504;GO:0006508;GO:0006914;GO:0008152;GO:0009056;GO:0009057;GO:0009987;GO:0016043;GO:0019538;GO:0019882;GO:0019884;GO:0019886;GO:0022411;GO:0022617;GO:0030163;GO:0030198;GO:0030574;GO:0032501;GO:0032963;GO:0043062;GO:0043170;GO:0044236;GO:0044237;GO:0044238;GO:0044243;GO:0044248;GO:0044259;GO:0048002;GO:0071840;GO:0071841;GO:0071842;GO:0071845	GO:0003824;GO:0004175;GO:0004190;GO:0008233;GO:0016787;GO:0070001;GO:0070011	GO:0000323;GO:0005576;GO:0005615;GO:0005764;GO:0005773;GO:0005775;GO:0016023;GO:0031410;GO:0031974;GO:0031982;GO:0031988;GO:0042470;GO:0043202;GO:0043226;GO:0043227;GO:0043229;GO:0043230;GO:0043231;GO:0043233;GO:0044421;GO:0044422;GO:0044424;GO:0044425;GO:0044437;GO:0044444;GO:0044446;GO:0044464;GO:0045121;GO:0048770;GO:0065010;GO:0070013;GO:0070062	AIGAVPLIQGEYM[15.9949]IPCEK	18	2	1	AIGAVPLIQGEYM[15.9949]IPC[125.0477]EK	AIGAVPLIQGEYM[15.9949]IPC[130.0791]EK	C	-0.246559	NaN	1.91899	-0.746913	NaN	-0.000595785	-1.00526	-0.746666	-0.692893	-0.309708	-0.664639	-0.216058	-2.22962	-0.913387	2.1857	-1.20265	-1.31282	-0.2644	-1.57503	NaN	NaN	-2.74944	-1.11305	1.75425	-1.72269	-1.10353	-1.40983	NaN	-0.498358	-1.50559	-1.61386
+	+	0.0442456	2.16316	1.26436	P15121	Aldo-keto reductase family 1 member B1	AKR1B1	81	GO:0005975;GO:0005996;GO:0006000;GO:0006066;GO:0006629;GO:0006694;GO:0006700;GO:0006950;GO:0008152;GO:0008202;GO:0008207;GO:0008610;GO:0009058;GO:0009987;GO:0010817;GO:0016051;GO:0019318;GO:0019319;GO:0034637;GO:0034754;GO:0042445;GO:0042446;GO:0044237;GO:0044238;GO:0044249;GO:0044262;GO:0044281;GO:0044283;GO:0046165;GO:0046364;GO:0046370;GO:0050896;GO:0065007;GO:0065008	GO:0003824;GO:0004032;GO:0004033;GO:0008106;GO:0009055;GO:0016491;GO:0016614;GO:0016616;GO:0016903;GO:0043795	GO:0005615;GO:0005654;GO:0005737;GO:0005829;GO:0031982;GO:0031988;GO:0043226;GO:0043227;GO:0043230;GO:0044421;GO:0044422;GO:0044424;GO:0044428;GO:0044444;GO:0044446;GO:0044464;GO:0065010;GO:0070062	LWCTYHEK	8	2	1	LWC[125.0477]TYHEK	LWC[130.0791]TYHEK	C	4.00417	NaN	0.109226	NaN	0.97571	NaN	-0.114963	NaN	NaN	NaN	NaN	-0.233493	NaN	NaN	NaN	-0.858344	-0.931529	2.81957	-0.798624	NaN	NaN	NaN	1.70429	NaN	NaN	-6.67207	5.60515	0.117703	NaN	NaN	1.89886
+	+	0	8.48416	1.20674	Q03135	Caveolin-1	CAV1	156	GO:0000122;GO:0000165;GO:0000188;GO:0001525;GO:0001570;GO:0001666;GO:0001765;GO:0001932;GO:0001933;GO:0001934;GO:0001936;GO:0001937;GO:0001959;GO:0001960;GO:0002026;GO:0002376;GO:0002682;GO:0002684;GO:0002694;GO:0002696;GO:0003008;GO:0003013;GO:0003018;GO:0003057;GO:0006355;GO:0006357;GO:0006461;GO:0006469;GO:0006629;GO:0006638;GO:0006639;GO:0006641;GO:0006662;GO:0006807;GO:0006810;GO:0006811;GO:…	GO:0005102;GO:0005113;GO:0005198;GO:0005488;GO:0005496;GO:0005515;GO:0008047;GO:0008200;GO:0008289;GO:0015459;GO:0015485;GO:0016247;GO:0016248;GO:0016504;GO:0019870;GO:0019899;GO:0019900;GO:0019901;GO:0030234;GO:0032934;GO:0032947;GO:0042802;GO:0044325;GO:0050998;GO:0061134;GO:0070320	GO:0000139;GO:0002080;GO:0005622;GO:0005768;GO:0005783;GO:0005811;GO:0005886;GO:0005887;GO:0005901;GO:0005912;GO:0005924;GO:0005925;GO:0005929;GO:0005938;GO:0010008;GO:0012506;GO:0016020;GO:0016021;GO:0016323;GO:0016324;GO:0030054;GO:0030055;GO:0030659;GO:0030666;GO:0030667;GO:0031090;GO:0031224;GO:0031226;GO:0031410;GO:0031901;GO:0031982;GO:0032991;GO:0042995;GO:0043226;GO:0043227;GO:0043229;GO:…	VYSIYVHTVCDPLFEAVGK	19	2;3	1	VYSIYVHTVC[125.0477]DPLFEAVGK	VYSIYVHTVC[130.0791]DPLFEAVGK	C	1.48946	NaN	2.12427	1.07036	1.85071	0.0112945	2.32234	NaN	0.581666	NaN	1.60305	NaN	-1.0617	NaN	1.61823	0.0839714	1.94843	NaN	2.16463	NaN	1.11944	0.0378038	2.30086	0.0989726	2.05366	NaN	0.782685	NaN	1.9405	NaN	1.75013
+	+	0	6.08538	1.15169	O43765	Small glutamine-rich tetratricopeptide repeat-containing protein alpha	SGTA	148	GO:0016032		GO:0005737;GO:0044424;GO:0044464	AICIDPAYSK	10	2	1	AIC[125.0477]IDPAYSK	AIC[130.0791]IDPAYSK	C	1.4234	NaN	2.70562	1.1811	3.58177	1.04666	NaN	0.949869	NaN	0.696024	2.32112	1.92033	0.668016	0.950513	NaN	2.27869	NaN	2.2039	NaN	NaN	2.25106	1.24672	2.49281	2.19767	3.31029	0.0790083	3.82132	1.24955	2.83407	2.78551	2.68284
	+	0.133736	1.47397	1.15021	P49368	T-complex protein 1 subunit gamma	CCT3	398	GO:0006457;GO:0006458;GO:0007339;GO:0008037;GO:0008152;GO:0009987;GO:0009988;GO:0016043;GO:0019538;GO:0022414;GO:0022607;GO:0035036;GO:0043170;GO:0044237;GO:0044238;GO:0044260;GO:0044267;GO:0046931;GO:0048610;GO:0051084;GO:0071840;GO:0071841;GO:0071842;GO:0071844	GO:0000166;GO:0005488;GO:0005515;GO:0005524;GO:0017076;GO:0030554;GO:0032553;GO:0032555;GO:0032559;GO:0035639;GO:0051082	GO:0005737;GO:0005829;GO:0005832;GO:0005856;GO:0005874;GO:0005886;GO:0016020;GO:0031982;GO:0031988;GO:0032991;GO:0043226;GO:0043227;GO:0043228;GO:0043229;GO:0043230;GO:0043232;GO:0043234;GO:0044297;GO:0044421;GO:0044422;GO:0044424;GO:0044430;GO:0044444;GO:0044445;GO:0044446;GO:0044464;GO:0065010;GO:0070062	NLQDAMQVCR	10	2	1	NLQDAMQVC[125.0477]R	NLQDAMQVC[130.0791]R	C	NaN	NaN	NaN	NaN	NaN	NaN	NaN	NaN	NaN	2.73625	NaN	0.351354	NaN	0.36494	4.64875	0.832317	NaN	0.733305	2.23937	NaN	NaN	NaN	NaN	-3.35412	1.80647	0.958109	NaN	-10.6643	2.49088	1.54595	NaN
+	+	0.0491852	2.09557	1.08559	Q96JY6	PDZ and LIM domain protein 2	PDLIM2	160		GO:0005488;GO:0008270;GO:0043167;GO:0043169;GO:0046872;GO:0046914	GO:0001725;GO:0005634;GO:0005856;GO:0005912;GO:0005924;GO:0005925;GO:0015629;GO:0030054;GO:0030055;GO:0030863;GO:0030864;GO:0031982;GO:0031988;GO:0032432;GO:0042641;GO:0043226;GO:0043227;GO:0043228;GO:0043229;GO:0043230;GO:0043231;GO:0043232;GO:0044421;GO:0044422;GO:0044424;GO:0044430;GO:0044444;GO:0044446;GO:0044448;GO:0044464;GO:0065010;GO:0070062;GO:0070161	SFQSLACSPGLPAADR	16	2	1	SFQSLAC[125.0477]SPGLPAADR	SFQSLAC[130.0791]SPGLPAADR	C	-2.73557	NaN	1.0583	NaN	0.661475	-1.63396	1.55161	NaN	2.15332	NaN	1.99763	NaN	NaN	NaN	2.25022	1.14932	-3.35622	NaN	1.72228	NaN	NaN	NaN	NaN	NaN	1.76291	NaN	2.58916	NaN	-3.19592	-3.46819	-0.165552
	+	0.133369	1.47702	1.02389	P21266	Glutathione S-transferase Mu 3	GSTM3	119	GO:0001885;GO:0002064;GO:0006082;GO:0006518;GO:0006520;GO:0006575;GO:0006725;GO:0006749;GO:0006790;GO:0006805;GO:0006807;GO:0006950;GO:0008065;GO:0008152;GO:0009056;GO:0009308;GO:0009636;GO:0009719;GO:0009725;GO:0009987;GO:0010033;GO:0018916;GO:0019752;GO:0032502;GO:0033554;GO:0034641;GO:0042178;GO:0042180;GO:0042221;GO:0042537;GO:0043436;GO:0043627;GO:0044106;GO:0044237;GO:0044238;GO:0044248;GO:…	GO:0003824;GO:0004364;GO:0005488;GO:0005515;GO:0016597;GO:0016740;GO:0016765;GO:0019899;GO:0031406;GO:0042277;GO:0042802;GO:0042803;GO:0043176;GO:0043295;GO:0046983;GO:0072341	GO:0005634;GO:0005737;GO:0005829;GO:0031982;GO:0031988;GO:0035686;GO:0043226;GO:0043227;GO:0043229;GO:0043230;GO:0043231;GO:0044421;GO:0044422;GO:0044424;GO:0044442;GO:0044444;GO:0044446;GO:0044460;GO:0044463;GO:0044464;GO:0065010;GO:0070062	LCYSSDHEK	9	2	1	LC[125.0477]YSSDHEK	LC[130.0791]YSSDHEK	C	2.72561	NaN	-0.0280536	NaN	0.150791	NaN	-0.0194939	0.0688198	0.179114	5.1284	NaN	0.251497	NaN	4.49492	NaN	NaN	-0.0801237	NaN	0.437931	NaN	NaN	NaN	-0.350029	NaN	0.0739186	-0.0398811	NaN	-0.539813	NaN	NaN	-0.104884
+	+	0.0153103	2.78293	0.984788	P35579	Myosin-9	MYH9	671	GO:0000212;GO:0000226;GO:0000768;GO:0000910;GO:0001525;GO:0001701;GO:0001767;GO:0001768;GO:0002376;GO:0002521;GO:0002573;GO:0006508;GO:0006509;GO:0006810;GO:0006911;GO:0006928;GO:0006935;GO:0006949;GO:0006996;GO:0007010;GO:0007017;GO:0007051;GO:0007155;GO:0007163;GO:0007165;GO:0007166;GO:0007167;GO:0007169;GO:0007229;GO:0007264;GO:0007411;GO:0007520;GO:0008152;GO:0008277;GO:0008360;GO:0009605;GO:…	GO:0000146;GO:0000166;GO:0003774;GO:0003779;GO:0003824;GO:0005488;GO:0005515;GO:0005524;GO:0008092;GO:0016462;GO:0016787;GO:0016817;GO:0016818;GO:0016887;GO:0017076;GO:0017111;GO:0019904;GO:0030554;GO:0030898;GO:0032553;GO:0032555;GO:0032559;GO:0035639;GO:0042623;GO:0042802;GO:0042803;GO:0043495;GO:0043531;GO:0046983;GO:0051015	GO:0001725;GO:0001726;GO:0001772;GO:0001931;GO:0005634;GO:0005737;GO:0005819;GO:0005826;GO:0005829;GO:0005856;GO:0005886;GO:0005911;GO:0005912;GO:0005913;GO:0015629;GO:0016020;GO:0016459;GO:0016460;GO:0030054;GO:0031252;GO:0031594;GO:0031982;GO:0031988;GO:0032154;GO:0032155;GO:0032432;GO:0032991;GO:0042641;GO:0042995;GO:0043226;GO:0043227;GO:0043228;GO:0043229;GO:0043230;GO:0043231;GO:0043232;GO:…	CIIPNHEK	8	2	1	C[125.0477]IIPNHEK	C[130.0791]IIPNHEK	C	5.97975	NaN	5.06406	NaN	4.45415	4.71467	5.4426	NaN	6.31009	NaN	NaN	5.31888	NaN	2.2879	6.917	4.7749	6.35831	2.88339	NaN	NaN	3.96279	2.73937	NaN	5.05922	6.14701	4.68808	3.11807	4.83974	5.37149	NaN	5.99673
+	+	0.00464516	3.40493	0.982856	P00748	Coagulation factor XII	F12	238	GO:0002254;GO:0002353;GO:0002376;GO:0002526;GO:0002542;GO:0002673;GO:0006950;GO:0006952;GO:0006954;GO:0006955;GO:0007596;GO:0007597;GO:0007599;GO:0008152;GO:0009611;GO:0010033;GO:0010468;GO:0010755;GO:0010756;GO:0010954;GO:0016485;GO:0016540;GO:0019222;GO:0019538;GO:0030193;GO:0030194;GO:0030195;GO:0031347;GO:0031638;GO:0032101;GO:0032501;GO:0035966;GO:0042221;GO:0042730;GO:0043170;GO:0044238;GO:…	GO:0003824;GO:0004175;GO:0004177;GO:0004252;GO:0005488;GO:0005515;GO:0008233;GO:0008236;GO:0008238;GO:0016787;GO:0017171;GO:0051787;GO:0070008;GO:0070009;GO:0070011	GO:0005576;GO:0005615;GO:0005886;GO:0016020;GO:0031982;GO:0031988;GO:0043226;GO:0043227;GO:0043230;GO:0044421;GO:0044464;GO:0065010;GO:0070062	TTLSGAPCQPWASEATYR	18	2	1	TTLSGAPC[125.0477]QPWASEATYR	TTLSGAPC[130.0791]QPWASEATYR	C	-0.753056	-2.20955	-2.66475	-0.272628	-0.178124	-2.81567	-3.5811	-3.61459	NaN	-3.12768	-2.83311	NaN	-2.60333	-2.08551	-0.199014	NaN	-1.62714	NaN	0.254074	-0.280237	NaN	-0.551109	NaN	-1.32413	NaN	NaN	-3.7661	-0.179581	-2.29841	-4.17477	-0.818119
	+	0.169445	1.32726	0.964833	Q00610	Clathrin heavy chain 1	CLTC	5	GO:0000041;GO:0000280;GO:0001649;GO:0002376;GO:0002478;GO:0002495;GO:0002504;GO:0006810;GO:0006811;GO:0006812;GO:0006826;GO:0006886;GO:0006892;GO:0006897;GO:0006898;GO:0006996;GO:0007067;GO:0008152;GO:0009987;GO:0010324;GO:0015031;GO:0015682;GO:0016043;GO:0016044;GO:0016192;GO:0019882;GO:0019884;GO:0019886;GO:0022402;GO:0022403;GO:0030001;GO:0030154;GO:0031623;GO:0032502;GO:0033572;GO:0043112;GO:…	GO:0003676;GO:0003723;GO:0003725;GO:0005198;GO:0005488;GO:0005515;GO:0019899;GO:0019900;GO:0019901;GO:0030276;GO:0032051	GO:0000139;GO:0005737;GO:0005819;GO:0005829;GO:0005886;GO:0005912;GO:0005924;GO:0005925;GO:0012506;GO:0016020;GO:0016023;GO:0030054;GO:0030055;GO:0030117;GO:0030118;GO:0030120;GO:0030125;GO:0030130;GO:0030132;GO:0030135;GO:0030136;GO:0030659;GO:0030662;GO:0030665;GO:0030666;GO:0030669;GO:0031090;GO:0031410;GO:0031982;GO:0031988;GO:0032588;GO:0032991;GO:0042470;GO:0043226;GO:0043227;GO:0043228;GO:…	QNLQLCVQVASK	12	2	1	QNLQLC[125.0477]VQVASK	QNLQLC[130.0791]VQVASK	C	0.0414959	NaN	0.384437	NaN	NaN	-0.210848	NaN	0.251231	NaN	NaN	NaN	0.346976	-0.0501645	-1.02523	NaN	0.0375402	-0.951692	-1.4101	0.435412	NaN	NaN	NaN	NaN	0.108683	0.186485	-1.03512	-0.394402	-0.16364	0.0377948	NaN	0.396767
+	+	0	5.8237	0.912833	Q12907	Vesicular integral-membrane protein VIP36	LMAN2	202	GO:0006810;GO:0006890;GO:0009987;GO:0015031;GO:0016192;GO:0030100;GO:0032879;GO:0045184;GO:0045807;GO:0046907;GO:0048193;GO:0048518;GO:0048522;GO:0050764;GO:0050766;GO:0050789;GO:0050794;GO:0051049;GO:0051050;GO:0051128;GO:0051130;GO:0051234;GO:0051649;GO:0060627;GO:0065007	GO:0001948;GO:0005488;GO:0005515;GO:0005529;GO:0005537;GO:0030246;GO:0031072;GO:0043167;GO:0043169;GO:0046872;GO:0048029	GO:0000139;GO:0005615;GO:0005789;GO:0005793;GO:0005794;GO:0005887;GO:0009986;GO:0016020;GO:0016021;GO:0031090;GO:0031224;GO:0031226;GO:0031982;GO:0031988;GO:0033116;GO:0043226;GO:0043227;GO:0043229;GO:0043230;GO:0043231;GO:0044421;GO:0044422;GO:0044424;GO:0044425;GO:0044431;GO:0044432;GO:0044444;GO:0044446;GO:0044459;GO:0044464;GO:0065010;GO:0070062	WTELAGCTADFR	12	2	1	WTELAGC[125.0477]TADFR	WTELAGC[130.0791]TADFR	C	-0.918406	-2.10821	-1.63492	NaN	-0.488799	-1.12002	-1.31147	0.00133603	-0.57302	-1.57561	-0.209049	NaN	-1.45478	-3.06365	-0.65416	-2.03538	-1.2024	NaN	-0.728656	-0.900931	NaN	-1.26869	-1.78205	NaN	-1.40938	NaN	-1.78329	-1.57472	-1.02299	NaN	-1.35065
+	+	0.00578641	3.29328	0.89059	O94979	Protein transport protein Sec31A	SEC31A	1130	GO:0002376;GO:0002474;GO:0002478;GO:0002495;GO:0002504;GO:0005975;GO:0006464;GO:0006486;GO:0006487;GO:0006810;GO:0006888;GO:0006901;GO:0006950;GO:0006984;GO:0006986;GO:0006996;GO:0007165;GO:0008152;GO:0009987;GO:0010033;GO:0010035;GO:0010038;GO:0015031;GO:0016043;GO:0016050;GO:0016192;GO:0018193;GO:0018196;GO:0018279;GO:0019538;GO:0019882;GO:0019884;GO:0019886;GO:0030968;GO:0033554;GO:0034620;GO:…	GO:0005488;GO:0005515;GO:0048306	GO:0000139;GO:0005737;GO:0005783;GO:0005789;GO:0005829;GO:0012506;GO:0012507;GO:0016020;GO:0016023;GO:0030117;GO:0030120;GO:0030127;GO:0030133;GO:0030134;GO:0030135;GO:0030658;GO:0030659;GO:0030662;GO:0031090;GO:0031410;GO:0031982;GO:0031988;GO:0032991;GO:0043226;GO:0043227;GO:0043229;GO:0043231;GO:0043234;GO:0044422;GO:0044424;GO:0044425;GO:0044431;GO:0044432;GO:0044433;GO:0044444;GO:0044446;GO:…	CLSSATDPQTK	11	2	1	C[125.0477]LSSATDPQTK	C[130.0791]LSSATDPQTK	C	NaN	NaN	7.59065	3.28825	NaN	4.27403	NaN	NaN	NaN	NaN	NaN	NaN	NaN	3.41476	NaN	3.61387	NaN	3.45095	NaN	NaN	NaN	3.90601	NaN	2.63049	4.70304	3.91159	NaN	2.36426	NaN	3.54831	NaN
+	+	0.0165906	2.7437	0.875739	P04899	Guanine nucleotide-binding protein G(i) subunit alpha-2	GNAI2	66	GO:0000186;GO:0001775;GO:0001932;GO:0001973;GO:0006140;GO:0006464;GO:0006468;GO:0006793;GO:0006796;GO:0007049;GO:0007154;GO:0007165;GO:0007166;GO:0007186;GO:0007187;GO:0007188;GO:0007193;GO:0007194;GO:0007213;GO:0007214;GO:0007267;GO:0007268;GO:0007584;GO:0007596;GO:0007599;GO:0008152;GO:0008283;GO:0008284;GO:0009605;GO:0009889;GO:0009987;GO:0009991;GO:0010646;GO:0010648;GO:0010959;GO:0016310;GO:…	GO:0000166;GO:0001664;GO:0003824;GO:0003924;GO:0004871;GO:0005102;GO:0005488;GO:0005515;GO:0005525;GO:0016462;GO:0016787;GO:0016817;GO:0016818;GO:0017076;GO:0017111;GO:0019001;GO:0031683;GO:0032403;GO:0032553;GO:0032555;GO:0032561;GO:0035639;GO:0043167;GO:0043169;GO:0046872;GO:0060089	GO:0005654;GO:0005737;GO:0005813;GO:0005815;GO:0005829;GO:0005834;GO:0005886;GO:0016020;GO:0019897;GO:0019898;GO:0030496;GO:0031234;GO:0031982;GO:0031988;GO:0032991;GO:0043226;GO:0043227;GO:0043228;GO:0043229;GO:0043230;GO:0043232;GO:0043234;GO:0044421;GO:0044422;GO:0044424;GO:0044425;GO:0044428;GO:0044430;GO:0044444;GO:0044446;GO:0044459;GO:0044464;GO:0045121;GO:0065010;GO:0070062	IIHEDGYSEEECR	13	2	1	IIHEDGYSEEEC[125.0477]R	IIHEDGYSEEEC[130.0791]R	C	1.52043	-2.52982	3.45378	NaN	NaN	NaN	NaN	1.34546	NaN	NaN	1.94446	1.43067	1.38244	1.31118	1.99006	-0.342367	2.14524	0.0958395	NaN	NaN	NaN	NaN	2.46934	NaN	NaN	NaN	NaN	1.74437	NaN	2.99928	2.19691
	+	0.0649594	1.9421	0.847456	Q10570	Cleavage and polyadenylation specificity factor subunit 1	CPSF1	699	GO:0000375;GO:0000377;GO:0000398;GO:0006139;GO:0006351;GO:0006353;GO:0006366;GO:0006369;GO:0006378;GO:0006379;GO:0006396;GO:0006397;GO:0006405;GO:0006406;GO:0006807;GO:0006810;GO:0006913;GO:0008152;GO:0008380;GO:0009058;GO:0009059;GO:0009987;GO:0010467;GO:0015931;GO:0016070;GO:0016071;GO:0031123;GO:0031124;GO:0032774;GO:0034641;GO:0034645;GO:0043170;GO:0043631;GO:0044237;GO:0044238;GO:0044249;GO:…	GO:0003676;GO:0003723;GO:0003729;GO:0003730;GO:0005488	GO:0005654;GO:0005847;GO:0005849;GO:0032991;GO:0043234;GO:0044422;GO:0044424;GO:0044428;GO:0044446;GO:0044451;GO:0044464	VITLCLYR	8	2	1	VITLC[125.0477]LYR	VITLC[130.0791]LYR	C	0.089477	2.78786	1.88403	0.275596	2.39885	0.0180113	2.08027	0.128118	3.05671	1.61747	0.597048	1.9871	-1.93688	NaN	0.0476663	NaN	2.59097	NaN	2.32594	3.22979	2.52879	-0.0475505	2.80707	0.487645	2.08335	NaN	1.98995	2.77911	1.84901	NaN	2.93286
	+	0.074116	1.85754	0.832412	P31146	Coronin-1A	CORO1A	24	GO:0001775;GO:0001776;GO:0001845;GO:0001894;GO:0002252;GO:0002260;GO:0002263;GO:0002285;GO:0002323;GO:0002366;GO:0002376;GO:0002682;GO:0002684;GO:0002694;GO:0002696;GO:0006810;GO:0006811;GO:0006812;GO:0006816;GO:0006887;GO:0006897;GO:0006906;GO:0006909;GO:0006928;GO:0006935;GO:0006944;GO:0006950;GO:0006952;GO:0006955;GO:0006996;GO:0007010;GO:0007015;GO:0007155;GO:0008064;GO:0008284;GO:0008360;GO:…	GO:0003779;GO:0003785;GO:0005488;GO:0005515;GO:0008022;GO:0008092;GO:0017022;GO:0019899;GO:0019900;GO:0032036;GO:0042802;GO:0042803;GO:0043548;GO:0046983;GO:0051015	GO:0001772;GO:0001891;GO:0005737;GO:0005768;GO:0005769;GO:0005856;GO:0005884;GO:0005886;GO:0005911;GO:0012506;GO:0016020;GO:0016023;GO:0030027;GO:0030054;GO:0030139;GO:0030424;GO:0030659;GO:0030666;GO:0030670;GO:0030863;GO:0030864;GO:0031090;GO:0031410;GO:0031982;GO:0031988;GO:0032991;GO:0042995;GO:0043005;GO:0043226;GO:0043227;GO:0043228;GO:0043229;GO:0043230;GO:0043231;GO:0043232;GO:0043234;GO:…	ADQCYEDVR	9	2	1	ADQC[125.0477]YEDVR	ADQC[130.0791]YEDVR	C	NaN	NaN	2.12291	NaN	3.01473	1.24202	2.03799	-0.00552657	1.14588	NaN	5.9856	1.13917	2.34532	2.77514	1.02885	3.72716	1.95878	3.37058	NaN	NaN	NaN	NaN	2.67661	NaN	3.81346	3.81643	NaN	0.461908	4.88255	1.30007	2.67406
+	+	0.00567347	3.32566	0.831044	Q9UBQ5	Eukaryotic translation initiation factor 3 subunit K	EIF3K	87	GO:0001731;GO:0006412;GO:0006413;GO:0006417;GO:0006446;GO:0008152;GO:0009058;GO:0009059;GO:0009889;GO:0009987;GO:0010467;GO:0010468;GO:0010556;GO:0010608;GO:0016043;GO:0019222;GO:0019538;GO:0022607;GO:0022618;GO:0031323;GO:0031326;GO:0032268;GO:0034621;GO:0034622;GO:0034645;GO:0043170;GO:0043933;GO:0044237;GO:0044238;GO:0044249;GO:0044260;GO:0044267;GO:0050789;GO:0050794;GO:0051246;GO:0060255;GO:…	GO:0003676;GO:0003723;GO:0003743;GO:0005488;GO:0008135;GO:0043021;GO:0043022	GO:0005634;GO:0005737;GO:0005829;GO:0005852;GO:0016020;GO:0016282;GO:0030529;GO:0031982;GO:0031988;GO:0032991;GO:0033290;GO:0043226;GO:0043227;GO:0043229;GO:0043230;GO:0043231;GO:0043234;GO:0044421;GO:0044424;GO:0044444;GO:0044464;GO:0065010;GO:0070062;GO:0070993	CMIDQAHQEERPIR	14	2;3	1	C[125.0477]MIDQAHQEERPIR	C[130.0791]MIDQAHQEERPIR	C	4.12438	NaN	3.27069	4.11142	5.95979	NaN	3.84955	NaN	4.31006	3.14931	3.4821	3.15156	4.68434	1.62736	NaN	2.88664	2.8016	NaN	3.86138	NaN	5.47127	NaN	3.41811	3.04978	NaN	2.96234	NaN	1.71249	NaN	3.97521	NaN
+	+	0.0403602	2.23302	0.819765	P13693	Translationally-controlled tumor protein	TPT1	28	GO:0006810;GO:0006811;GO:0006812;GO:0006816;GO:0006873;GO:0006874;GO:0006875;GO:0009607;GO:0009615;GO:0009987;GO:0010941;GO:0019725;GO:0030001;GO:0030003;GO:0042592;GO:0042981;GO:0043066;GO:0043067;GO:0043069;GO:0048519;GO:0048523;GO:0048878;GO:0050789;GO:0050794;GO:0050801;GO:0050896;GO:0051234;GO:0051704;GO:0051707;GO:0055065;GO:0055074;GO:0055080;GO:0055082;GO:0060548;GO:0065007;GO:0065008;GO:…	GO:0005488;GO:0005509;GO:0043167;GO:0043169;GO:0046872	GO:0005615;GO:0005634;GO:0005737;GO:0005768;GO:0005770;GO:0005771;GO:0031982;GO:0031988;GO:0043226;GO:0043227;GO:0043229;GO:0043230;GO:0043231;GO:0044421;GO:0044424;GO:0044444;GO:0044464;GO:0065010;GO:0070062	EIADGLCLEVEGK	13	2	1	EIADGLC[125.0477]LEVEGK	EIADGLC[130.0791]LEVEGK	C	-1.77415	NaN	NaN	0.977159	0.702168	1.03711	1.02264	-2.38332	1.20148	-0.0933205	1.67	-2.17821	-0.0688629	1.13712	0.607046	0.937415	NaN	1.08561	1.27813	NaN	NaN	0.0332919	1.01984	NaN	NaN	0.373948	1.30399	0.740442	1.15251	1.35646	NaN
+	+	0	7.40317	0.816025	P63244	Receptor of activated protein C kinase 1	RACK1	138	GO:0001558;GO:0001649;GO:0001678;GO:0001932;GO:0001933;GO:0001934;GO:0003254;GO:0006140;GO:0006417;GO:0006469;GO:0006919;GO:0007049;GO:0007369;GO:0009653;GO:0009743;GO:0009746;GO:0009749;GO:0009889;GO:0009890;GO:0009892;GO:0009893;GO:0009894;GO:0009896;GO:0009966;GO:0009968;GO:0009987;GO:0010033;GO:0010468;GO:0010470;GO:0010556;GO:0010558;GO:0010562;GO:0010563;GO:0010604;GO:0010605;GO:0010608;GO:…	GO:0004857;GO:0004860;GO:0005080;GO:0005102;GO:0005198;GO:0005488;GO:0005515;GO:0008047;GO:0008200;GO:0008656;GO:0016247;GO:0016248;GO:0016504;GO:0016505;GO:0019207;GO:0019210;GO:0019887;GO:0019899;GO:0019900;GO:0019901;GO:0019902;GO:0019903;GO:0019904;GO:0030234;GO:0030292;GO:0030971;GO:0032947;GO:0035591;GO:0042169;GO:0042802;GO:0042803;GO:0043028;GO:0046983;GO:0060090;GO:0061134	GO:0001891;GO:0005634;GO:0005737;GO:0005739;GO:0005829;GO:0005856;GO:0015935;GO:0030425;GO:0030496;GO:0030529;GO:0031982;GO:0031988;GO:0032991;GO:0042995;GO:0043005;GO:0043025;GO:0043204;GO:0043226;GO:0043227;GO:0043228;GO:0043229;GO:0043230;GO:0043231;GO:0043232;GO:0044297;GO:0044421;GO:0044422;GO:0044424;GO:0044425;GO:0044444;GO:0044446;GO:0044459;GO:0044464;GO:0048471;GO:0065010;GO:0070062	LWNTLGVCK	9	2	1	LWNTLGVC[125.0477]K	LWNTLGVC[130.0791]K	C	NaN	NaN	NaN	NaN	1.8278	0.555374	2.62276	0.637051	2.02097	0.0542487	NaN	-1.48755	0.81937	0.754469	2.32125	0.849469	1.35281	1.3304	2.8891	NaN	NaN	1.57071	1.28558	1.0114	NaN	0.835946	NaN	0.194206	1.5378	0.717663	1.40507
	+	0.0922086	1.72443	0.785649	P08865	40S ribosomal protein SA	RPSA	163	GO:0000028;GO:0000184;GO:0000447;GO:0000461;GO:0000469;GO:0000478;GO:0000479;GO:0000956;GO:0006139;GO:0006364;GO:0006396;GO:0006401;GO:0006402;GO:0006405;GO:0006407;GO:0006412;GO:0006413;GO:0006414;GO:0006415;GO:0006605;GO:0006612;GO:0006613;GO:0006614;GO:0006807;GO:0006810;GO:0006886;GO:0006913;GO:0007155;GO:0008152;GO:0009056;GO:0009057;GO:0009058;GO:0009059;GO:0009987;GO:0010467;GO:0015031;GO:…	GO:0003735;GO:0004872;GO:0005055;GO:0005198;GO:0005488;GO:0043021;GO:0043022	GO:0005634;GO:0005737;GO:0005829;GO:0005886;GO:0015935;GO:0016020;GO:0022627;GO:0030529;GO:0030684;GO:0030686;GO:0031982;GO:0031988;GO:0032991;GO:0043226;GO:0043227;GO:0043229;GO:0043230;GO:0043231;GO:0044421;GO:0044422;GO:0044424;GO:0044444;GO:0044446;GO:0044464;GO:0065010;GO:0070062	YVDIAIPCNNK	11	2	1	YVDIAIPC[125.0477]NNK	YVDIAIPC[130.0791]NNK	C	1.09837	NaN	1.19115	1.81548	1.20761	2.05064	0.911788	-4.15661	NaN	-4.33734	1.00927	-0.433049	-0.607893	-0.546396	1.05033	-2.35071	0.775979	-0.820062	1.15369	NaN	NaN	2.18276	1.12313	-0.680533	0.672915	-0.869933	NaN	-0.28487	1.27015	-3.65942	0.751013
+	+	0.0170526	2.71941	0.77616	P21333	Filamin-A	FLNA	2601	GO:0000226;GO:0000902;GO:0000904;GO:0001775;GO:0001837;GO:0002576;GO:0006139;GO:0006140;GO:0006351;GO:0006355;GO:0006356;GO:0006366;GO:0006807;GO:0006810;GO:0006887;GO:0006996;GO:0007010;GO:0007015;GO:0007017;GO:0007051;GO:0007052;GO:0007155;GO:0007165;GO:0007166;GO:0007186;GO:0007187;GO:0007188;GO:0007193;GO:0007194;GO:0007195;GO:0007212;GO:0007264;GO:0007596;GO:0007599;GO:0008104;GO:0008152;GO:…	GO:0001948;GO:0003779;GO:0004871;GO:0005102;GO:0005488;GO:0005515;GO:0008092;GO:0008134;GO:0017016;GO:0017048;GO:0017160;GO:0019899;GO:0031267;GO:0034987;GO:0034988;GO:0042802;GO:0042803;GO:0046983;GO:0048365;GO:0051015;GO:0051020;GO:0060089	GO:0005576;GO:0005634;GO:0005737;GO:0005802;GO:0005829;GO:0005856;GO:0005884;GO:0005886;GO:0005912;GO:0005924;GO:0005925;GO:0015629;GO:0016020;GO:0030054;GO:0030055;GO:0030863;GO:0031523;GO:0031982;GO:0031988;GO:0032991;GO:0043025;GO:0043198;GO:0043226;GO:0043227;GO:0043228;GO:0043229;GO:0043230;GO:0043231;GO:0043232;GO:0043234;GO:0044297;GO:0044421;GO:0044422;GO:0044424;GO:0044427;GO:0044428;GO:…	TPCEEILVK	9	2	1	TPC[125.0477]EEILVK	TPC[130.0791]EEILVK	C	2.84867	-2.20372	3.21354	2.37772	0.526545	2.29899	2.97992	0.505631	4.13814	1.71947	3.77681	0.781591	2.32235	1.38537	4.01922	3.57593	2.47228	1.75239	4.02037	-1.88467	1.49598	2.4957	0.240025	0.861351	3.25468	0.475486	3.31713	0.207673	0.600877	5.23193	2.83763
+	+	0.000928571	4.10446	0.770476	P04406	Glyceraldehyde-3-phosphate dehydrogenase	GAPDH	247	GO:0000226;GO:0005975;GO:0005996;GO:0006006;GO:0006066;GO:0006094;GO:0006417;GO:0006464;GO:0006915;GO:0006996;GO:0007010;GO:0007017;GO:0008152;GO:0008219;GO:0009058;GO:0009889;GO:0009890;GO:0009892;GO:0009987;GO:0010033;GO:0010468;GO:0010556;GO:0010558;GO:0010605;GO:0010608;GO:0012501;GO:0016043;GO:0016051;GO:0016265;GO:0017014;GO:0017148;GO:0018119;GO:0018193;GO:0018198;GO:0019222;GO:0019318;GO:…	GO:0000166;GO:0003824;GO:0004365;GO:0005488;GO:0005515;GO:0008017;GO:0008092;GO:0015631;GO:0016491;GO:0016620;GO:0016740;GO:0016769;GO:0016903;GO:0035605;GO:0042802;GO:0048037;GO:0050661;GO:0050662;GO:0051287	GO:0005634;GO:0005737;GO:0005811;GO:0005829;GO:0005856;GO:0005886;GO:0015630;GO:0016020;GO:0030529;GO:0031090;GO:0031965;GO:0031982;GO:0031988;GO:0032991;GO:0043226;GO:0043227;GO:0043228;GO:0043229;GO:0043230;GO:0043231;GO:0043232;GO:0044421;GO:0044422;GO:0044424;GO:0044428;GO:0044444;GO:0044446;GO:0044464;GO:0048471;GO:0065010;GO:0070062	LTGMAFRVPTANVSVVDLTCR	21	3	1	LTGMAFRVPTANVSVVDLTC[125.0477]R	LTGMAFRVPTANVSVVDLTC[130.0791]R	C	1.49584	-1.28561	0.562694	1.89371	2.07335	1.84638	1.50189	1.08371	1.82891	1.51765	1.33065	-0.183545	0.533934	0.336825	2.40311	-0.242449	0.46322	-0.00190467	1.98796	1.04364	2.25946	1.60938	-0.395177	0.445963	-0.313068	0.158364	1.567	0.176317	0.343036	0.309859	0.205863
+	+	0.0106565	2.96599	0.754996	P40939	Trifunctional enzyme subunit alpha, mitochondrial	HADHA	550	GO:0006082;GO:0006629;GO:0006631;GO:0006635;GO:0006644;GO:0006650;GO:0008152;GO:0008610;GO:0008654;GO:0009056;GO:0009058;GO:0009062;GO:0009719;GO:0009725;GO:0009987;GO:0010033;GO:0016042;GO:0016054;GO:0019395;GO:0019637;GO:0019752;GO:0030258;GO:0032048;GO:0032787;GO:0032868;GO:0034440;GO:0035965;GO:0042180;GO:0042221;GO:0042493;GO:0043434;GO:0043436;GO:0044237;GO:0044238;GO:0044242;GO:0044248;GO:…	GO:0000062;GO:0000166;GO:0003824;GO:0003857;GO:0003985;GO:0003988;GO:0004300;GO:0005488;GO:0005504;GO:0008289;GO:0016407;GO:0016408;GO:0016453;GO:0016491;GO:0016508;GO:0016509;GO:0016614;GO:0016616;GO:0016740;GO:0016746;GO:0016747;GO:0016829;GO:0016835;GO:0016836;GO:0031406;GO:0033293;GO:0048037;GO:0050662;GO:0051287	GO:0005739;GO:0005743;GO:0009295;GO:0016020;GO:0016507;GO:0019866;GO:0031090;GO:0031966;GO:0032991;GO:0042645;GO:0043226;GO:0043227;GO:0043228;GO:0043229;GO:0043231;GO:0043232;GO:0043234;GO:0044422;GO:0044424;GO:0044429;GO:0044444;GO:0044446;GO:0044464	CLAPMMSEVIR	11	2	1	C[125.0477]LAPMMSEVIR	C[130.0791]LAPMMSEVIR	C	3.32645	-4.19224	NaN	NaN	NaN	NaN	NaN	NaN	NaN	1.7491	NaN	NaN	2.87542	2.75919	3.40263	4.07936	2.82877	2.63491	NaN	-4.55414	NaN	NaN	3.01279	3.38607	3.15418	3.21735	4.23721	0.9626	3.17997	NaN	3.07341
+	+	0.0207205	2.62289	0.73143	P04899	Guanine nucleotide-binding protein G(i) subunit alpha-2	GNAI2	326	GO:0000186;GO:0001775;GO:0001932;GO:0001973;GO:0006140;GO:0006464;GO:0006468;GO:0006793;GO:0006796;GO:0007049;GO:0007154;GO:0007165;GO:0007166;GO:0007186;GO:0007187;GO:0007188;GO:0007193;GO:0007194;GO:0007213;GO:0007214;GO:0007267;GO:0007268;GO:0007584;GO:0007596;GO:0007599;GO:0008152;GO:0008283;GO:0008284;GO:0009605;GO:0009889;GO:0009987;GO:0009991;GO:0010646;GO:0010648;GO:0010959;GO:0016310;GO:…	GO:0000166;GO:0001664;GO:0003824;GO:0003924;GO:0004871;GO:0005102;GO:0005488;GO:0005515;GO:0005525;GO:0016462;GO:0016787;GO:0016817;GO:0016818;GO:0017076;GO:0017111;GO:0019001;GO:0031683;GO:0032403;GO:0032553;GO:0032555;GO:0032561;GO:0035639;GO:0043167;GO:0043169;GO:0046872;GO:0060089	GO:0005654;GO:0005737;GO:0005813;GO:0005815;GO:0005829;GO:0005834;GO:0005886;GO:0016020;GO:0019897;GO:0019898;GO:0030496;GO:0031234;GO:0031982;GO:0031988;GO:0032991;GO:0043226;GO:0043227;GO:0043228;GO:0043229;GO:0043230;GO:0043232;GO:0043234;GO:0044421;GO:0044422;GO:0044424;GO:0044425;GO:0044428;GO:0044430;GO:0044444;GO:0044446;GO:0044459;GO:0044464;GO:0045121;GO:0065010;GO:0070062	DTKEIYTHFTCATDTK	16	2;3	1	DTKEIYTHFTC[125.0477]ATDTK	DTKEIYTHFTC[130.0791]ATDTK	C	1.04373	-1.5851	0.739729	NaN	0.755923	NaN	NaN	-2.86894	1.32736	NaN	0.849452	-2.78483	-0.867801	-1.2541	-0.376933	1.31082	0.858447	-0.376995	0.869783	NaN	-0.469559	NaN	0.689546	1.4325	-0.590239	-2.82057	NaN	NaN	1.78376	-2.27053	NaN
+	+	0	5.67145	0.71362	P00325	All-trans-retinol dehydrogenase [NAD(+)] ADH1B	ADH1B	241	GO:0006066;GO:0006067;GO:0006069;GO:0006805;GO:0008152;GO:0009987;GO:0034308;GO:0044237;GO:0044281;GO:0055114	GO:0003824;GO:0004022;GO:0004024;GO:0005488;GO:0008270;GO:0016491;GO:0016614;GO:0016616;GO:0043167;GO:0043169;GO:0046872;GO:0046914	GO:0005829;GO:0044424;GO:0044444;GO:0044464	AKELGATECINPQDYK	16	2;3	1	AKELGATEC[125.0477]INPQDYK	AKELGATEC[130.0791]INPQDYK	C	0.36736	NaN	0.853203	-3.12006	0.319831	-0.249419	0.193623	NaN	0.469131	NaN	0.654744	NaN	0.330132	NaN	0.609216	0.412618	0.552213	NaN	0.333183	-2.19353	0.47036	-0.710283	0.105542	0.551872	0.306437	-0.582971	0.398025	NaN	0.258466	-0.385025	0.404114
+	+	0.0255519	2.48332	0.705073	P12814	Alpha-actinin-1	ACTN1	370	GO:0001775;GO:0002576;GO:0006810;GO:0006887;GO:0006996;GO:0007010;GO:0007015;GO:0007044;GO:0007596;GO:0007599;GO:0009987;GO:0010941;GO:0016043;GO:0016192;GO:0022607;GO:0030029;GO:0030036;GO:0030168;GO:0030198;GO:0032501;GO:0032879;GO:0032940;GO:0034329;GO:0034330;GO:0042981;GO:0043062;GO:0043067;GO:0046903;GO:0048041;GO:0048519;GO:0048523;GO:0050789;GO:0050794;GO:0050817;GO:0050878;GO:0051017;GO:…	GO:0000988;GO:0000989;GO:0003676;GO:0003712;GO:0003713;GO:0003723;GO:0003725;GO:0005102;GO:0005178;GO:0005488;GO:0005509;GO:0005515;GO:0008092;GO:0017166;GO:0030374;GO:0032403;GO:0043167;GO:0043169;GO:0044325;GO:0046872	GO:0001725;GO:0001726;GO:0005576;GO:0005615;GO:0005634;GO:0005737;GO:0005829;GO:0005856;GO:0005886;GO:0005911;GO:0005912;GO:0005913;GO:0005916;GO:0005924;GO:0005925;GO:0016020;GO:0030018;GO:0030054;GO:0030055;GO:0030863;GO:0030864;GO:0031093;GO:0031143;GO:0031974;GO:0031982;GO:0031983;GO:0031988;GO:0032432;GO:0034774;GO:0042641;GO:0042995;GO:0043005;GO:0043197;GO:0043226;GO:0043227;GO:0043228;GO:…	MVSDINNAWGCLEQVEK	17	2	1	MVSDINNAWGC[125.0477]LEQVEK	MVSDINNAWGC[130.0791]LEQVEK	C	NaN	1.96239	NaN	NaN	2.63553	3.26479	NaN	NaN	2.52238	NaN	2.17273	NaN	0.659293	0.788278	2.08779	0.598993	0.103935	0.488571	NaN	4.57731	NaN	NaN	0.69338	1.77595	NaN	1.15602	2.56773	0.249559	NaN	-0.289638	1.24454
+	+	0.0254286	2.48547	0.694492	P58107	Epiplakin	EPPK1	2404			GO:0005737;GO:0005856;GO:0043226;GO:0043228;GO:0043229;GO:0043232;GO:0044424;GO:0044464	CVPDPDTGLYMLQLAGR	17	2;3	1	C[125.0477]VPDPDTGLYMLQLAGR	C[130.0791]VPDPDTGLYMLQLAGR	C	3.36867	-3.26755	NaN	2.24747	2.11896	1.86395	NaN	1.55365	2.34616	2.64781	NaN	NaN	NaN	1.59779	1.32781	2.08485	2.86756	1.84705	NaN	-2.61636	NaN	2.25505	NaN	0.578643	0.719592	2.21966	NaN	NaN	2.68676	NaN	NaN
	+	0.0663394	1.92471	0.67717	P22392	Nucleoside diphosphate kinase B	NME2	145	GO:0006139;GO:0006163;GO:0006164;GO:0006183;GO:0006213;GO:0006220;GO:0006221;GO:0006228;GO:0006241;GO:0006351;GO:0006355;GO:0006357;GO:0006753;GO:0006807;GO:0007155;GO:0007165;GO:0007166;GO:0007229;GO:0008152;GO:0008284;GO:0009058;GO:0009059;GO:0009116;GO:0009117;GO:0009119;GO:0009141;GO:0009142;GO:0009144;GO:0009145;GO:0009147;GO:0009148;GO:0009150;GO:0009152;GO:0009165;GO:0009199;GO:0009201;GO:…	GO:0000166;GO:0001071;GO:0003676;GO:0003677;GO:0003700;GO:0003824;GO:0004550;GO:0004672;GO:0004673;GO:0005488;GO:0005524;GO:0016301;GO:0016740;GO:0016772;GO:0016773;GO:0016775;GO:0016776;GO:0017076;GO:0019205;GO:0030554;GO:0032553;GO:0032555;GO:0032559;GO:0035639;GO:0043167;GO:0043169;GO:0046872	GO:0001726;GO:0005634;GO:0005737;GO:0005739;GO:0005829;GO:0030027;GO:0031982;GO:0031988;GO:0042995;GO:0043226;GO:0043227;GO:0043229;GO:0043230;GO:0043231;GO:0044421;GO:0044424;GO:0044444;GO:0044464;GO:0065010;GO:0070062;GO:0071944	SCAHDWVYE	9	2	1	SC[125.0477]AHDWVYE	SC[130.0791]AHDWVYE	C	NaN	NaN	0.532635	NaN	0.515201	1.52581	NaN	1.04961	NaN	1.56142	NaN	-1.46396	-0.0516141	0.338497	NaN	-1.61243	1.63813	-0.761159	0.529107	1.61059	NaN	NaN	NaN	0.583387	1.54203	0.623171	0.42443	1.06532	1.30026	-4.29504	-5.19004
+	+	0.00126667	4.00768	0.655605	P13639	Elongation factor 2	EEF2	369	GO:0002244;GO:0006412;GO:0006414;GO:0006417;GO:0006464;GO:0008152;GO:0009058;GO:0009059;GO:0009889;GO:0009891;GO:0009893;GO:0009987;GO:0010467;GO:0010468;GO:0010556;GO:0010557;GO:0010604;GO:0010608;GO:0017182;GO:0017183;GO:0018193;GO:0018202;GO:0019222;GO:0019538;GO:0030154;GO:0031323;GO:0031325;GO:0031326;GO:0031328;GO:0032268;GO:0032270;GO:0032502;GO:0034645;GO:0043170;GO:0043412;GO:0043687;GO:…	GO:0000166;GO:0003676;GO:0003723;GO:0003746;GO:0003824;GO:0003924;GO:0005488;GO:0005515;GO:0005525;GO:0008135;GO:0016462;GO:0016787;GO:0016817;GO:0016818;GO:0017076;GO:0017111;GO:0019001;GO:0019899;GO:0019900;GO:0019901;GO:0032553;GO:0032555;GO:0032561;GO:0035639	GO:0005634;GO:0005737;GO:0005829;GO:0005844;GO:0005886;GO:0016020;GO:0016234;GO:0016235;GO:0030529;GO:0031982;GO:0031988;GO:0032991;GO:0043226;GO:0043227;GO:0043229;GO:0043230;GO:0043231;GO:0044421;GO:0044424;GO:0044444;GO:0044464;GO:0065010;GO:0070062	CELLYEGPPDDEAAMGIK	18	2	1	C[125.0477]ELLYEGPPDDEAAMGIK	C[130.0791]ELLYEGPPDDEAAMGIK	C	NaN	-2.21083	4.17795	NaN	2.13869	2.15962	3.50208	2.10232	NaN	3.04282	NaN	NaN	2.44435	0.807764	2.77192	2.1087	1.40678	2.10467	2.73306	-0.306229	NaN	2.8484	1.19639	3.11688	2.38946	0.795734	2.36278	0.15966	2.47788	1.51305	3.5913
+	+	0.0131971	2.86238	0.63058	P10768	S-formylglutathione hydrolase	ESD	28	GO:0006081;GO:0008152;GO:0009056;GO:0009987;GO:0044237;GO:0044248;GO:0044281;GO:0044282;GO:0046185;GO:0046292;GO:0046294	GO:0003824;GO:0016787;GO:0016788;GO:0016790;GO:0018738;GO:0019213;GO:0047374;GO:0052689	GO:0005654;GO:0005737;GO:0005794;GO:0005886;GO:0016020;GO:0016023;GO:0031410;GO:0031982;GO:0031988;GO:0043226;GO:0043227;GO:0043229;GO:0043230;GO:0043231;GO:0044421;GO:0044422;GO:0044424;GO:0044428;GO:0044444;GO:0044446;GO:0044464;GO:0065010;GO:0070062	VFEHDSVELNCK	12	2	1	VFEHDSVELNC[125.0477]K	VFEHDSVELNC[130.0791]K	C	1.5243	NaN	0.492942	NaN	1.69627	2.10314	-0.165998	2.92195	2.36658	NaN	1.2985	2.53335	NaN	0.725207	1.45851	0.316357	1.27918	0.743432	1.77249	-3.57553	2.9617	NaN	1.41636	0.68181	2.46966	1.37478	2.27321	0.784333	1.25272	2.55171	1.88151
+	+	0.0221163	2.56196	0.615638	Q15102	Platelet-activating factor acetylhydrolase IB subunit alpha1	PAFAH1B3	55	GO:0006629;GO:0007276;GO:0007283;GO:0007399;GO:0007420;GO:0008152;GO:0009056;GO:0016042;GO:0022414;GO:0032501;GO:0032502;GO:0044238;GO:0048232;GO:0048513;GO:0048609;GO:0048731;GO:0048856	GO:0003824;GO:0003847;GO:0005488;GO:0005515;GO:0016407;GO:0016740;GO:0016746;GO:0016747;GO:0016787;GO:0016788;GO:0042802;GO:0047179;GO:0052689	GO:0005737;GO:0005829;GO:0016020;GO:0031982;GO:0031988;GO:0043226;GO:0043227;GO:0043230;GO:0044421;GO:0044424;GO:0044444;GO:0044464;GO:0065010;GO:0070062	DKEPEVVFIGDSLVQLMHQCEIWR	24	3;4	1	DKEPEVVFIGDSLVQLMHQC[125.0477]EIWR	DKEPEVVFIGDSLVQLMHQC[130.0791]EIWR	C	1.46692	NaN	NaN	0.23764	3.10276	0.558337	2.17954	0.649906	NaN	0.578395	2.89918	NaN	NaN	0.841986	NaN	0.730838	NaN	1.00265	3.74513	3.61531	NaN	1.68298	NaN	0.847271	1.71643	2.34294	1.76334	0.344871	NaN	NaN	NaN
	+	0.0591483	1.9946	0.611365	P02768	Serum albumin	ALB	472;485	GO:0001775;GO:0001894;GO:0001895;GO:0001897;GO:0001906;GO:0001907;GO:0002576;GO:0006082;GO:0006629;GO:0006810;GO:0006811;GO:0006820;GO:0006887;GO:0006897;GO:0006898;GO:0006950;GO:0007154;GO:0007584;GO:0007596;GO:0007599;GO:0007610;GO:0007622;GO:0007623;GO:0008152;GO:0008202;GO:0008206;GO:0009267;GO:0009605;GO:0009987;GO:0009991;GO:0010033;GO:0010035;GO:0010038;GO:0010324;GO:0010941;GO:0015711;GO:…	GO:0003676;GO:0003677;GO:0005488;GO:0005504;GO:0005507;GO:0005515;GO:0008144;GO:0008270;GO:0008289;GO:0015643;GO:0016209;GO:0019842;GO:0030170;GO:0031406;GO:0033293;GO:0043167;GO:0043169;GO:0046872;GO:0046914;GO:0048037;GO:0051087;GO:0070279	GO:0005576;GO:0005604;GO:0005615;GO:0005634;GO:0031093;GO:0031974;GO:0031982;GO:0031983;GO:0031988;GO:0032991;GO:0034774;GO:0043226;GO:0043227;GO:0043229;GO:0043230;GO:0043231;GO:0043233;GO:0043234;GO:0044420;GO:0044421;GO:0044422;GO:0044424;GO:0044433;GO:0044444;GO:0044446;GO:0044464;GO:0060205;GO:0065010;GO:0070062;GO:0072562	MPCAEDYLSVVLNQLCVLHEK	21	3;4	2	MPC[125.0477]AEDYLSVVLNQLC[125.0477]VLHEK	MPC[130.0791]AEDYLSVVLNQLC[130.0791]VLHEK	C;C	-7.97795	-8.73064	-7.6791	-6.15944	-7.86539	-6.36213	-7.86028	-6.14851	-5.08313	-6.97122	-4.87029	NaN	-7.26863	-5.80132	-6.21747	-6.24057	-6.51137	-3.86275	-6.81346	-7.21366	-6.29801	-6.36623	-7.68739	-6.01019	-5.2224	-6.27519	-7.14331	-3.98922	-6.00583	-7.51474	-5.29281
+	+	0	5.94563	0.608181	Q93052	Lipoma-preferred partner	LPP	566	GO:0007155;GO:0009987;GO:0022610	GO:0005488;GO:0008270;GO:0043167;GO:0043169;GO:0046872;GO:0046914	GO:0005634;GO:0005737;GO:0005886;GO:0005912;GO:0005924;GO:0005925;GO:0016020;GO:0030054;GO:0030055;GO:0043226;GO:0043227;GO:0043229;GO:0043231;GO:0044424;GO:0044464;GO:0070161	IVALDRDFHVHCYR	14	3	1	IVALDRDFHVHC[125.0477]YR	IVALDRDFHVHC[130.0791]YR	C	0.453099	NaN	0.842198	0.448128	0.771546	0.943204	1.83796	0.0131287	0.770155	-0.106571	1.17041	0.376491	NaN	0.146572	1.73697	0.429567	0.234287	NaN	1.6027	NaN	0.876018	0.649457	0.747213	-0.9758	0.615706	0.108015	1.32853	0.406951	0.377007	0.248449	NaN
	+	0.149496	1.3981	0.604513	P55084	Trifunctional enzyme subunit beta, mitochondrial	HADHB	435	GO:0006082;GO:0006629;GO:0006631;GO:0006635;GO:0006644;GO:0006650;GO:0008152;GO:0008610;GO:0008654;GO:0009056;GO:0009058;GO:0009062;GO:0009987;GO:0016042;GO:0016054;GO:0019395;GO:0019637;GO:0019752;GO:0030258;GO:0032048;GO:0032787;GO:0034440;GO:0035965;GO:0042180;GO:0043436;GO:0044237;GO:0044238;GO:0044242;GO:0044248;GO:0044249;GO:0044255;GO:0044281;GO:0044282;GO:0045017;GO:0046395;GO:0046471;GO:…	GO:0000062;GO:0000166;GO:0003824;GO:0003857;GO:0003988;GO:0004300;GO:0005488;GO:0005504;GO:0008289;GO:0016408;GO:0016491;GO:0016508;GO:0016509;GO:0016614;GO:0016616;GO:0016740;GO:0016746;GO:0016747;GO:0016829;GO:0016835;GO:0016836;GO:0031406;GO:0033293;GO:0048037;GO:0050662;GO:0051287	GO:0005739;GO:0005740;GO:0005741;GO:0005743;GO:0005783;GO:0009295;GO:0016020;GO:0016507;GO:0019866;GO:0019867;GO:0031090;GO:0031966;GO:0031967;GO:0031968;GO:0031975;GO:0031982;GO:0031988;GO:0032991;GO:0042645;GO:0043226;GO:0043227;GO:0043228;GO:0043229;GO:0043230;GO:0043231;GO:0043232;GO:0043234;GO:0044421;GO:0044422;GO:0044424;GO:0044429;GO:0044444;GO:0044446;GO:0044464;GO:0065010;GO:0070062	FNNWGGSLSLGHPFGATGCR	20	2;3	1	FNNWGGSLSLGHPFGATGC[125.0477]R	FNNWGGSLSLGHPFGATGC[130.0791]R	C	NaN	NaN	0.664598	NaN	NaN	NaN	NaN	NaN	NaN	NaN	NaN	NaN	0.206773	0.304407	1.12609	0.336265	-0.911273	-0.226839	NaN	NaN	NaN	NaN	NaN	NaN	0.360647	-0.0290006	NaN	NaN	0.943844	NaN	1.25724
+	+	0.041589	2.20506	0.597931	Q96PK6	RNA-binding protein 14	RBM14	90	GO:0006139;GO:0006259;GO:0006260;GO:0006281;GO:0006310;GO:0006325;GO:0006351;GO:0006355;GO:0006357;GO:0006366;GO:0006464;GO:0006476;GO:0006807;GO:0006950;GO:0006974;GO:0006996;GO:0007165;GO:0008152;GO:0009058;GO:0009059;GO:0009719;GO:0009725;GO:0009889;GO:0009891;GO:0009893;GO:0009987;GO:0010033;GO:0010468;GO:0010556;GO:0010557;GO:0010564;GO:0010604;GO:0010628;GO:0010639;GO:0010824;GO:0010948;GO:…	GO:0000166;GO:0000988;GO:0000989;GO:0001076;GO:0001104;GO:0003676;GO:0003712;GO:0003713;GO:0003723;GO:0005488;GO:0005515;GO:0030374;GO:0030674;GO:0060090	GO:0005654;GO:0005667;GO:0005730;GO:0016592;GO:0030529;GO:0032991;GO:0043226;GO:0043228;GO:0043229;GO:0043232;GO:0043234;GO:0044422;GO:0044424;GO:0044428;GO:0044446;GO:0044451;GO:0044464	IFVGNVSAACTSQELR	16	2	1	IFVGNVSAAC[125.0477]TSQELR	IFVGNVSAAC[130.0791]TSQELR	C	NaN	NaN	NaN	NaN	NaN	NaN	NaN	NaN	NaN	NaN	3.14932	NaN	2.50472	0.726023	0.980375	1.53141	1.63223	0.310381	2.71203	NaN	NaN	NaN	1.73177	2.81987	2.341	0.857143	NaN	NaN	2.72827	3.17525	3.09533
+	+	0.0403738	2.22638	0.597316	P09758	Tumor-associated calcium signal transducer 2	TACSTD2	66	GO:0002009;GO:0003008;GO:0007165;GO:0007166;GO:0007600;GO:0007601;GO:0008283;GO:0009653;GO:0009987;GO:0010632;GO:0010633;GO:0010639;GO:0022603;GO:0030334;GO:0030336;GO:0032231;GO:0032232;GO:0032501;GO:0032502;GO:0032879;GO:0032956;GO:0032970;GO:0033043;GO:0035239;GO:0040012;GO:0040013;GO:0042127;GO:0044087;GO:0045595;GO:0045597;GO:0048518;GO:0048519;GO:0048522;GO:0048523;GO:0048729;GO:0050678;GO:…	GO:0004872	GO:0005615;GO:0005634;GO:0005829;GO:0005887;GO:0009925;GO:0016020;GO:0016021;GO:0016328;GO:0031224;GO:0031226;GO:0031982;GO:0031988;GO:0043226;GO:0043227;GO:0043229;GO:0043230;GO:0043231;GO:0044421;GO:0044424;GO:0044425;GO:0044444;GO:0044459;GO:0044464;GO:0065010;GO:0070062	ALGSGMAVDCSTLTSK	16	2	1	ALGSGMAVDC[125.0477]STLTSK	ALGSGMAVDC[130.0791]STLTSK	C	NaN	-2.30283	-0.646886	-0.850883	-1.22711	-0.700235	NaN	-2.1856	-1.08458	NaN	-0.944139	NaN	NaN	-1.52769	NaN	NaN	NaN	NaN	-1.19536	-2.28232	-0.731844	-4.33946	-1.21804	-0.659394	-1.06078	-2.49534	NaN	-1.46745	-1.07618	NaN	-0.931969
	+	0.0565364	2.01556	0.591218	P06753	Tropomyosin alpha-3 chain	TPM3	191	GO:0003008;GO:0003012;GO:0006928;GO:0006936;GO:0009987;GO:0030029;GO:0030048;GO:0030049;GO:0032501;GO:0033275;GO:0070252		GO:0001725;GO:0005829;GO:0005856;GO:0005862;GO:0031982;GO:0031988;GO:0032432;GO:0042641;GO:0043226;GO:0043227;GO:0043228;GO:0043229;GO:0043230;GO:0043232;GO:0044421;GO:0044422;GO:0044424;GO:0044430;GO:0044444;GO:0044446;GO:0044449;GO:0044464;GO:0065010;GO:0070062	AELAESKCSELEEELKNVTNNLK	23	3;4	1	AELAESKC[125.0477]SELEEELKNVTNNLK	AELAESKC[130.0791]SELEEELKNVTNNLK	C	1.59809	NaN	1.28572	1.40948	1.40936	NaN	2.02383	NaN	NaN	1.26537	1.59186	-0.606329	0.724955	1.58021	3.0919	NaN	3.28088	NaN	NaN	NaN	1.68107	1.10588	0.930283	1.31396	1.68632	NaN	1.7937	NaN	1.50128	NaN	1.36903
+	+	0.0146389	2.79917	0.582476	Q01459	Di-N-acetylchitobiase	CTBS	93	GO:0000272;GO:0005975;GO:0005976;GO:0006022;GO:0006026;GO:0006030;GO:0006032;GO:0006807;GO:0008152;GO:0009056;GO:0009057;GO:0009308;GO:0009311;GO:0009313;GO:0016052;GO:0043170;GO:0044238	GO:0001871;GO:0003824;GO:0004553;GO:0004568;GO:0005488;GO:0008061;GO:0016787;GO:0016798;GO:0030246;GO:0030247	GO:0000323;GO:0005615;GO:0005764;GO:0005773;GO:0031982;GO:0031988;GO:0043226;GO:0043227;GO:0043229;GO:0043230;GO:0043231;GO:0044421;GO:0044424;GO:0044444;GO:0044464;GO:0065010;GO:0070062	YDSELMCYAHSK	12	2	1	YDSELMC[125.0477]YAHSK	YDSELMC[130.0791]YAHSK	C	-2.2549	NaN	-2.52066	-2.48147	NaN	NaN	-2.57285	-2.7244	NaN	-3.26941	-1.82813	NaN	NaN	NaN	NaN	-2.00707	-1.26655	NaN	-1.5309	NaN	NaN	-1.69471	-1.62907	NaN	-1.8188	-3.08219	-2.76063	NaN	NaN	NaN	-1.691
+	+	0.00633962	3.23957	0.582439	P45880	Voltage-dependent anion-selective channel protein 2	VDAC2	76	GO:0006810;GO:0006811;GO:0006820;GO:0031333;GO:0032271;GO:0032272;GO:0043254;GO:0044087;GO:0048519;GO:0048523;GO:0050789;GO:0050794;GO:0051128;GO:0051129;GO:0051234;GO:0065007	GO:0000166;GO:0005215;GO:0005216;GO:0005244;GO:0005253;GO:0005488;GO:0008308;GO:0008509;GO:0015075;GO:0015267;GO:0015288;GO:0022803;GO:0022829;GO:0022832;GO:0022836;GO:0022838;GO:0022857;GO:0022891;GO:0022892	GO:0005634;GO:0005739;GO:0005741;GO:0005743;GO:0009295;GO:0016020;GO:0019866;GO:0019867;GO:0031090;GO:0031966;GO:0031968;GO:0031982;GO:0031988;GO:0032991;GO:0042645;GO:0043226;GO:0043227;GO:0043228;GO:0043229;GO:0043230;GO:0043231;GO:0043232;GO:0043234;GO:0044421;GO:0044422;GO:0044424;GO:0044425;GO:0044429;GO:0044444;GO:0044446;GO:0044464;GO:0045121;GO:0046930;GO:0065010;GO:0070062	WCEYGLTFTEK	11	2	1	WC[125.0477]EYGLTFTEK	WC[130.0791]EYGLTFTEK	C	NaN	-2.92697	0.374642	NaN	NaN	NaN	NaN	0.29488	NaN	NaN	NaN	NaN	-0.258617	-0.0158528	0.668841	-0.324248	0.360125	-0.540734	0.418819	-2.0337	NaN	1.26628	NaN	0.725956	0.228555	-0.60976	NaN	NaN	0.0613176	NaN	NaN
+	+	0.00942636	3.01247	0.580903	O75083	WD repeat-containing protein 1	WDR1	382	GO:0001775;GO:0002576;GO:0003008;GO:0006810;GO:0006887;GO:0007596;GO:0007599;GO:0007600;GO:0007605;GO:0009987;GO:0014013;GO:0016192;GO:0030168;GO:0032501;GO:0032940;GO:0045595;GO:0045685;GO:0046903;GO:0048713;GO:0050767;GO:0050789;GO:0050793;GO:0050794;GO:0050817;GO:0050877;GO:0050878;GO:0050954;GO:0051234;GO:0051239;GO:0051649;GO:0051960;GO:0060284;GO:0065007;GO:0065008;GO:2000026		GO:0002102;GO:0005576;GO:0005737;GO:0005829;GO:0005884;GO:0030054;GO:0031982;GO:0031988;GO:0032991;GO:0042995;GO:0043226;GO:0043227;GO:0043228;GO:0043229;GO:0043230;GO:0043232;GO:0043234;GO:0044421;GO:0044422;GO:0044424;GO:0044430;GO:0044444;GO:0044446;GO:0044464;GO:0065010;GO:0070062	MTVDESGQLISCSMDDTVR	19	2;3	1	MTVDESGQLISC[125.0477]SMDDTVR	MTVDESGQLISC[130.0791]SMDDTVR	C	1.73133	NaN	2.09975	0.938507	1.95085	1.94448	2.33534	2.03672	1.7866	1.64733	1.31454	2.11528	2.82467	0.962475	2.32635	1.82586	-0.929439	1.08284	1.99845	0.495685	1.70706	1.86093	1.15159	1.77372	1.92404	0.424629	1.26227	1.36991	1.26481	2.12015	1.53067
+	+	0.00428235	3.4721	0.579916	P09497	Clathrin light chain B	CLTB	199	GO:0006810;GO:0006886;GO:0006897;GO:0006898;GO:0009987;GO:0010324;GO:0015031;GO:0016043;GO:0016044;GO:0016192;GO:0045184;GO:0046907;GO:0051234;GO:0051649;GO:0061024;GO:0071840;GO:0072583	GO:0005198;GO:0005488;GO:0005515;GO:0030276;GO:0032050;GO:0042277	GO:0005737;GO:0005802;GO:0005886;GO:0016020;GO:0030117;GO:0030118;GO:0030120;GO:0030125;GO:0030130;GO:0030132;GO:0031253;GO:0032991;GO:0043226;GO:0043227;GO:0043229;GO:0043231;GO:0043234;GO:0044422;GO:0044424;GO:0044425;GO:0044431;GO:0044433;GO:0044441;GO:0044444;GO:0044446;GO:0044459;GO:0044463;GO:0044464;GO:0060170	LCDFNPK	7	2	1	LC[125.0477]DFNPK	LC[130.0791]DFNPK	C	1.70631	NaN	1.83002	1.46168	3.04607	2.28269	1.28887	1.11078	NaN	0.89691	1.62327	0.658605	NaN	0.600579	1.87025	0.656397	0.915638	0.159515	1.85833	NaN	NaN	0.949644	NaN	1.45821	1.84258	0.51601	NaN	NaN	1.91628	1.69341	0.66318
+	+	0.000622222	4.41234	0.577042	P62888	60S ribosomal protein L30	RPL30	92	GO:0000184;GO:0000956;GO:0006139;GO:0006401;GO:0006402;GO:0006412;GO:0006413;GO:0006414;GO:0006415;GO:0006605;GO:0006612;GO:0006613;GO:0006614;GO:0006807;GO:0006810;GO:0006886;GO:0008152;GO:0009056;GO:0009057;GO:0009058;GO:0009059;GO:0009987;GO:0010467;GO:0015031;GO:0016032;GO:0016043;GO:0016070;GO:0016071;GO:0019058;GO:0019083;GO:0019538;GO:0022411;GO:0022414;GO:0022415;GO:0032774;GO:0032984;GO:…	GO:0003676;GO:0003723;GO:0003735;GO:0005198;GO:0005488	GO:0005634;GO:0005737;GO:0005829;GO:0005912;GO:0005924;GO:0005925;GO:0015934;GO:0016020;GO:0022625;GO:0030054;GO:0030055;GO:0030529;GO:0031982;GO:0031988;GO:0032991;GO:0043226;GO:0043227;GO:0043229;GO:0043230;GO:0043231;GO:0044421;GO:0044422;GO:0044424;GO:0044444;GO:0044446;GO:0044464;GO:0065010;GO:0070062;GO:0070161	VCTLAIIDPGDSDIIR	16	2	1	VC[125.0477]TLAIIDPGDSDIIR	VC[130.0791]TLAIIDPGDSDIIR	C	NaN	NaN	NaN	NaN	NaN	-1.21956	NaN	-1.39327	NaN	NaN	NaN	0.392017	NaN	-0.787751	NaN	0.129055	NaN	-0.089323	NaN	NaN	NaN	NaN	NaN	-0.282171	-0.0853193	-0.211117	NaN	NaN	-0.0543334	NaN	NaN
+	+	0	5.28136	0.574255	Q01518	Adenylyl cyclase-associated protein 1	CAP1	427	GO:0001667;GO:0001775;GO:0002576;GO:0006140;GO:0006810;GO:0006887;GO:0006897;GO:0006898;GO:0006928;GO:0006935;GO:0006996;GO:0007010;GO:0007163;GO:0007165;GO:0007190;GO:0007411;GO:0007596;GO:0007599;GO:0009605;GO:0009889;GO:0009987;GO:0010324;GO:0016043;GO:0016044;GO:0016192;GO:0016477;GO:0019219;GO:0019222;GO:0030029;GO:0030036;GO:0030168;GO:0030799;GO:0030802;GO:0030808;GO:0030814;GO:0030817;GO:…		GO:0005856;GO:0005886;GO:0005912;GO:0005924;GO:0005925;GO:0016020;GO:0030054;GO:0030055;GO:0030863;GO:0030864;GO:0031982;GO:0031988;GO:0043226;GO:0043227;GO:0043228;GO:0043229;GO:0043230;GO:0043232;GO:0044421;GO:0044422;GO:0044424;GO:0044430;GO:0044444;GO:0044446;GO:0044448;GO:0044464;GO:0065010;GO:0070062;GO:0070161	NSLDCEIVSAK	11	2	1	NSLDC[125.0477]EIVSAK	NSLDC[130.0791]EIVSAK	C	-0.581731	-1.94469	0.211442	-3.70452	0.224231	-0.633522	-0.0833632	-0.963566	0.156576	-2.1862	0.425569	-0.355833	0.906595	0.523048	0.859384	0.840887	0.944923	0.262807	0.746432	NaN	NaN	-1.46772	-0.189343	0.443882	0.554788	-1.09546	0.415644	0.297433	0.484285	0.358282	0.219465
+	+	0.0260217	2.47598	0.569982	P05091	Aldehyde dehydrogenase, mitochondrial	ALDH2	386	GO:0001505;GO:0005975;GO:0006066;GO:0006067;GO:0006068;GO:0006069;GO:0006805;GO:0007154;GO:0007267;GO:0007268;GO:0008152;GO:0009056;GO:0009058;GO:0009987;GO:0023052;GO:0034308;GO:0034310;GO:0042133;GO:0042136;GO:0044237;GO:0044238;GO:0044249;GO:0044281;GO:0044282;GO:0046164;GO:0055114;GO:0065007;GO:0065008	GO:0003824;GO:0004029;GO:0004030;GO:0009055;GO:0016491;GO:0016620;GO:0016903	GO:0005759;GO:0031974;GO:0031982;GO:0031988;GO:0043226;GO:0043227;GO:0043230;GO:0043233;GO:0044421;GO:0044422;GO:0044424;GO:0044429;GO:0044444;GO:0044446;GO:0044464;GO:0065010;GO:0070013;GO:0070062	LLCGGGIAADR	11	2	1	LLC[125.0477]GGGIAADR	LLC[130.0791]GGGIAADR	C	-2.73271	NaN	-3.22575	NaN	-1.27509	-0.417905	-1.17544	NaN	-1.30288	NaN	-2.59414	NaN	-0.71899	-1.26006	-1.52875	-0.256673	-0.733084	-1.42491	-1.82764	NaN	NaN	-0.916472	NaN	-1.09897	-0.325617	-3.12742	-0.881282	NaN	-3.11207	NaN	-1.04724
+	+	0.0401878	2.23082	0.567633	O60437	Periplakin	PPL	222	GO:0031424;GO:0032502	GO:0005198;GO:0005200	GO:0005634;GO:0005739;GO:0005856;GO:0005886;GO:0005911;GO:0016020;GO:0030054;GO:0030057;GO:0031982;GO:0031988;GO:0043226;GO:0043227;GO:0043228;GO:0043229;GO:0043230;GO:0043231;GO:0043232;GO:0044421;GO:0044424;GO:0044444;GO:0044464;GO:0065010;GO:0070062;GO:0070161	CTNELYWLDQQAK	13	2	1	C[125.0477]TNELYWLDQQAK	C[130.0791]TNELYWLDQQAK	C	2.72645	NaN	2.87352	1.89456	NaN	2.70477	NaN	2.71667	NaN	NaN	2.7666	NaN	NaN	NaN	NaN	0.940709	NaN	0.605109	NaN	NaN	NaN	2.98293	NaN	NaN	1.23466	1.23936	NaN	NaN	2.76461	NaN	3.11067
+	+	0.0260324	2.47378	0.563219	P10599	Thioredoxin	TXN	32;35	GO:0000103;GO:0000122;GO:0000302;GO:0001932;GO:0001934;GO:0002376;GO:0006139;GO:0006352;GO:0006355;GO:0006357;GO:0006367;GO:0006457;GO:0006662;GO:0006790;GO:0006807;GO:0006928;GO:0006950;GO:0006952;GO:0006955;GO:0006979;GO:0007154;GO:0007165;GO:0007267;GO:0008152;GO:0008283;GO:0009058;GO:0009314;GO:0009628;GO:0009889;GO:0009890;GO:0009892;GO:0009893;GO:0009966;GO:0009967;GO:0009987;GO:0010035;GO:…	GO:0003824;GO:0015035;GO:0015036;GO:0015037;GO:0016491;GO:0016667;GO:0016671	GO:0005634;GO:0005654;GO:0005737;GO:0005739;GO:0005829;GO:0031982;GO:0031988;GO:0043226;GO:0043227;GO:0043229;GO:0043230;GO:0043231;GO:0044421;GO:0044422;GO:0044424;GO:0044428;GO:0044444;GO:0044446;GO:0044464;GO:0065010;GO:0070062	LVVVDFSATWCGPCK	15	2	2	LVVVDFSATWC[125.0477]GPC[125.0477]K	LVVVDFSATWC[130.0791]GPC[130.0791]K	C;C	-2.27422	-2.39028	-0.476066	-1.95536	-1.38176	-1.01321	-0.487078	-0.235811	-1.17687	-1.74868	-1.67053	0.382555	-1.28914	-2.14473	-0.0772632	-0.665775	-2.44671	1.19701	-1.09068	-2.1293	NaN	-2.50795	-1.09221	-2.22161	-1.82503	-1.66063	-2.65706	0.555151	-1.97421	-3.25696	-3.06243
	+	0.0502927	2.08286	0.560625	P46940	Ras GTPase-activating-like protein IQGAP1	IQGAP1	1270	GO:0001817;GO:0001932;GO:0002064;GO:0002791;GO:0006091;GO:0006112;GO:0006140;GO:0007165;GO:0007166;GO:0007167;GO:0007169;GO:0007173;GO:0007264;GO:0008152;GO:0008543;GO:0009719;GO:0009892;GO:0009894;GO:0009987;GO:0010033;GO:0010035;GO:0010038;GO:0010563;GO:0010646;GO:0015980;GO:0019219;GO:0019220;GO:0019222;GO:0023051;GO:0030811;GO:0031323;GO:0031324;GO:0031329;GO:0031399;GO:0032268;GO:0032502;GO:…	GO:0004857;GO:0005095;GO:0005096;GO:0005488;GO:0005509;GO:0005515;GO:0005516;GO:0005543;GO:0005547;GO:0008047;GO:0008289;GO:0019207;GO:0019209;GO:0019887;GO:0019899;GO:0019900;GO:0019901;GO:0019902;GO:0019903;GO:0030234;GO:0030295;GO:0030695;GO:0035091;GO:0043167;GO:0043169;GO:0043539;GO:0046872;GO:0060589	GO:0005654;GO:0005737;GO:0005829;GO:0005874;GO:0005884;GO:0005886;GO:0005912;GO:0005924;GO:0005925;GO:0016020;GO:0016328;GO:0019897;GO:0019898;GO:0030054;GO:0030055;GO:0030424;GO:0030426;GO:0030427;GO:0030496;GO:0031234;GO:0031252;GO:0031982;GO:0031988;GO:0032991;GO:0042995;GO:0043005;GO:0043226;GO:0043227;GO:0043230;GO:0043234;GO:0044421;GO:0044422;GO:0044424;GO:0044425;GO:0044428;GO:0044430;GO:…	FFQTACDVPELQDK	14	2	1	FFQTAC[125.0477]DVPELQDK	FFQTAC[130.0791]DVPELQDK	C	-4.57509	NaN	-4.54646	NaN	NaN	-4.59583	-4.0751	-4.9552	NaN	NaN	-4.36172	NaN	-4.7746	-4.79074	NaN	-5.64187	-4.25359	-4.71607	NaN	NaN	NaN	-4.68898	NaN	-1.18485	-4.97017	-5.81011	-4.5217	NaN	-4.73266	NaN	-4.13417
	+	0.139492	1.44254	0.553919	Q9Y2Q5	Ragulator complex protein LAMTOR2	LAMTOR2	76	GO:0000186;GO:0001101;GO:0001932;GO:0006140;GO:0006464;GO:0006468;GO:0006793;GO:0006796;GO:0008104;GO:0008152;GO:0009719;GO:0009894;GO:0009966;GO:0009967;GO:0009987;GO:0010033;GO:0010243;GO:0010646;GO:0010647;GO:0014075;GO:0016049;GO:0016310;GO:0019219;GO:0019220;GO:0019222;GO:0019538;GO:0023051;GO:0023056;GO:0030811;GO:0031323;GO:0031329;GO:0031399;GO:0032006;GO:0032008;GO:0032147;GO:0032268;GO:…		GO:0005765;GO:0005768;GO:0005770;GO:0005774;GO:0016020;GO:0031090;GO:0031982;GO:0031988;GO:0032991;GO:0043226;GO:0043227;GO:0043229;GO:0043230;GO:0043231;GO:0043234;GO:0044421;GO:0044422;GO:0044424;GO:0044425;GO:0044437;GO:0044440;GO:0044444;GO:0044446;GO:0044464;GO:0065010;GO:0070062;GO:0071986	FILMDCMEGR	10	2	1	FILMDC[125.0477]MEGR	FILMDC[130.0791]MEGR	C	2.3088	NaN	1.6622	-0.486841	1.00731	0.325762	1.01586	1.49534	NaN	0.453885	2.14201	NaN	0.0804171	1.28062	0.613331	1.03717	1.01794	0.991155	0.959578	NaN	NaN	-0.782599	2.21734	0.761085	1.85842	1.50916	1.16479	NaN	1.7707	NaN	0.236372
+	+	0.000487805	4.53312	0.549023	P46109	Crk-like protein	CRKL	44	GO:0000165;GO:0000186;GO:0001568;GO:0001932;GO:0003002;GO:0006464;GO:0006468;GO:0006793;GO:0006796;GO:0006950;GO:0007165;GO:0007166;GO:0007167;GO:0007169;GO:0007243;GO:0007254;GO:0007264;GO:0007265;GO:0007389;GO:0007507;GO:0008152;GO:0009653;GO:0009887;GO:0009952;GO:0009987;GO:0016310;GO:0019220;GO:0019222;GO:0019538;GO:0031098;GO:0031323;GO:0031399;GO:0032147;GO:0032268;GO:0032502;GO:0033554;GO:…	GO:0004871;GO:0005070;GO:0005488;GO:0005515;GO:0030674;GO:0035591;GO:0060089;GO:0060090	GO:0005768;GO:0005829;GO:0031982;GO:0031988;GO:0043226;GO:0043227;GO:0043229;GO:0043230;GO:0043231;GO:0044421;GO:0044424;GO:0044444;GO:0044464;GO:0065010;GO:0070062	DSSTCPGDYVLSVSENSR	18	2	1	DSSTC[125.0477]PGDYVLSVSENSR	DSSTC[130.0791]PGDYVLSVSENSR	C	1.22641	NaN	1.98137	1.5596	1.33354	0.989858	NaN	0.747247	1.80816	0.877447	1.31243	NaN	NaN	0.273497	NaN	0.554036	0.896923	1.13318	NaN	NaN	NaN	NaN	NaN	0.85323	1.29863	0.491679	NaN	0.88235	NaN	1.91827	1.09357
+	+	0.0448559	2.15663	0.544846	O00429	Dynamin-1-like protein	DNM1L	431	GO:0000266;GO:0001836;GO:0003373;GO:0003374;GO:0006461;GO:0006810;GO:0006897;GO:0006915;GO:0006921;GO:0006996;GO:0007005;GO:0008104;GO:0008152;GO:0008219;GO:0008637;GO:0009653;GO:0009987;GO:0010324;GO:0010638;GO:0010821;GO:0010822;GO:0010941;GO:0010942;GO:0012501;GO:0016043;GO:0016044;GO:0016192;GO:0016265;GO:0016559;GO:0022411;GO:0022603;GO:0022607;GO:0032459;GO:0032502;GO:0032879;GO:0032880;GO:…	GO:0000166;GO:0003824;GO:0003924;GO:0005488;GO:0005515;GO:0005525;GO:0008289;GO:0016462;GO:0016787;GO:0016817;GO:0016818;GO:0017076;GO:0017111;GO:0019001;GO:0019899;GO:0031625;GO:0032553;GO:0032555;GO:0032561;GO:0035639;GO:0042802;GO:0042803;GO:0046983	GO:0005737;GO:0005739;GO:0005741;GO:0005777;GO:0005794;GO:0005829;GO:0005874;GO:0005905;GO:0012506;GO:0016020;GO:0019867;GO:0030054;GO:0030659;GO:0030662;GO:0030665;GO:0030672;GO:0031090;GO:0031966;GO:0031968;GO:0032991;GO:0042579;GO:0043226;GO:0043227;GO:0043229;GO:0043231;GO:0043234;GO:0044422;GO:0044424;GO:0044425;GO:0044429;GO:0044430;GO:0044433;GO:0044444;GO:0044446;GO:0044456;GO:0044464;GO:…	CVELVHEEMQR	11	2	1	C[125.0477]VELVHEEMQR	C[130.0791]VELVHEEMQR	C	1.40399	0.0667468	1.33633	NaN	NaN	-0.0162142	1.4788	0.955218	NaN	0.993529	1.38798	NaN	-0.961027	-1.49066	NaN	-0.770622	0.462683	NaN	2.09761	NaN	NaN	-0.236959	NaN	2.88405	0.57825	-0.794382	1.28512	2.5632	0.728991	NaN	NaN
	+	0.0988353	1.67868	0.541888	P36955	Pigment epithelium-derived factor	SERPINF1	261	GO:0001678;GO:0001822;GO:0003008;GO:0007154;GO:0007275;GO:0007568;GO:0007584;GO:0007610;GO:0007611;GO:0007613;GO:0007614;GO:0008283;GO:0008285;GO:0009268;GO:0009605;GO:0009628;GO:0009719;GO:0009725;GO:0009743;GO:0009746;GO:0009749;GO:0009892;GO:0009987;GO:0009991;GO:0010033;GO:0010035;GO:0010038;GO:0010447;GO:0010466;GO:0010468;GO:0010594;GO:0010596;GO:0010605;GO:0010629;GO:0010720;GO:0010951;GO:…	GO:0004857;GO:0004866;GO:0004867;GO:0030234;GO:0030414;GO:0061134;GO:0061135	GO:0005576;GO:0005604;GO:0005615;GO:0016023;GO:0031410;GO:0031982;GO:0031988;GO:0033267;GO:0042470;GO:0043203;GO:0043226;GO:0043227;GO:0043229;GO:0043230;GO:0043231;GO:0044420;GO:0044421;GO:0044424;GO:0044444;GO:0044463;GO:0044464;GO:0048471;GO:0048770;GO:0065010;GO:0070062	YGLDSDLSCK	10	2	1	YGLDSDLSC[125.0477]K	YGLDSDLSC[130.0791]K	C	1.31261	0.403038	1.12536	NaN	NaN	1.92715	1.38197	1.03447	NaN	0.843792	1.19642	0.947654	0.989956	0.622582	1.84526	1.2928	0.856509	0.925889	1.0749	0.721435	NaN	1.32811	1.7975	1.30275	2.43877	NaN	-0.00955373	0.671634	1.11213	-2.01909	NaN
+	+	0.00149254	3.91621	0.540795	Q9NZU5	LIM and cysteine-rich domains protein 1	LMCD1	278	GO:0000122;GO:0002230;GO:0002682;GO:0002697;GO:0002831;GO:0006139;GO:0006351;GO:0006355;GO:0006357;GO:0006807;GO:0008152;GO:0009058;GO:0009059;GO:0009889;GO:0009890;GO:0009892;GO:0009966;GO:0009967;GO:0009987;GO:0010468;GO:0010556;GO:0010558;GO:0010605;GO:0010611;GO:0010629;GO:0010646;GO:0010647;GO:0014743;GO:0016070;GO:0019219;GO:0019222;GO:0023051;GO:0023056;GO:0031323;GO:0031324;GO:0031326;GO:…	GO:0000988;GO:0000989;GO:0003712;GO:0003714;GO:0005488;GO:0008270;GO:0043167;GO:0043169;GO:0046872;GO:0046914	GO:0005615;GO:0005634;GO:0005737;GO:0043226;GO:0043227;GO:0043229;GO:0043231;GO:0044421;GO:0044424;GO:0044464	CSEPLVDLIYFWK	13	2	1	C[125.0477]SEPLVDLIYFWK	C[130.0791]SEPLVDLIYFWK	C	NaN	NaN	1.50409	NaN	2.41342	NaN	1.26786	NaN	1.23622	NaN	2.17166	NaN	NaN	0.456706	1.93435	0.906097	2.05197	0.369603	1.89102	NaN	NaN	NaN	2.06837	NaN	1.85949	0.146626	NaN	1.83768	2.20427	1.8638	2.33294
	+	0.0861795	1.76866	0.535541	P01024	Complement C3	C3	720	GO:0001796;GO:0001798;GO:0001817;GO:0001819;GO:0001932;GO:0001934;GO:0001969;GO:0001970;GO:0002252;GO:0002253;GO:0002376;GO:0002673;GO:0002675;GO:0002682;GO:0002684;GO:0002697;GO:0002699;GO:0002703;GO:0002705;GO:0002706;GO:0002708;GO:0002712;GO:0002714;GO:0002819;GO:0002821;GO:0002822;GO:0002824;GO:0002861;GO:0002863;GO:0002864;GO:0002866;GO:0002883;GO:0002885;GO:0002886;GO:0002888;GO:0002889;GO:…	GO:0001664;GO:0004857;GO:0004866;GO:0005102;GO:0005488;GO:0005515;GO:0030234;GO:0030414;GO:0031714;GO:0031715;GO:0061134;GO:0061135	GO:0005576;GO:0005615;GO:0005886;GO:0016020;GO:0031982;GO:0031988;GO:0043226;GO:0043227;GO:0043230;GO:0044421;GO:0044464;GO:0065010;GO:0070062;GO:0072562	FISLGEACK	9	2	1	FISLGEAC[125.0477]K	FISLGEAC[130.0791]K	C	NaN	-3.22427	-3.00898	NaN	-2.60619	NaN	-2.15707	NaN	-1.12821	NaN	-3.20667	NaN	-3.04305	-2.33958	NaN	-2.81015	NaN	NaN	-2.67938	-2.2424	NaN	NaN	NaN	-2.30278	-2.50076	NaN	-0.431928	-5.04099	-2.70258	-2.78612	NaN
+	+	0.0242247	2.50968	0.528105	O00429	Dynamin-1-like protein	DNM1L	345	GO:0000266;GO:0001836;GO:0003373;GO:0003374;GO:0006461;GO:0006810;GO:0006897;GO:0006915;GO:0006921;GO:0006996;GO:0007005;GO:0008104;GO:0008152;GO:0008219;GO:0008637;GO:0009653;GO:0009987;GO:0010324;GO:0010638;GO:0010821;GO:0010822;GO:0010941;GO:0010942;GO:0012501;GO:0016043;GO:0016044;GO:0016192;GO:0016265;GO:0016559;GO:0022411;GO:0022603;GO:0022607;GO:0032459;GO:0032502;GO:0032879;GO:0032880;GO:…	GO:0000166;GO:0003824;GO:0003924;GO:0005488;GO:0005515;GO:0005525;GO:0008289;GO:0016462;GO:0016787;GO:0016817;GO:0016818;GO:0017076;GO:0017111;GO:0019001;GO:0019899;GO:0031625;GO:0032553;GO:0032555;GO:0032561;GO:0035639;GO:0042802;GO:0042803;GO:0046983	GO:0005737;GO:0005739;GO:0005741;GO:0005777;GO:0005794;GO:0005829;GO:0005874;GO:0005905;GO:0012506;GO:0016020;GO:0019867;GO:0030054;GO:0030659;GO:0030662;GO:0030665;GO:0030672;GO:0031090;GO:0031966;GO:0031968;GO:0032991;GO:0042579;GO:0043226;GO:0043227;GO:0043229;GO:0043231;GO:0043234;GO:0044422;GO:0044424;GO:0044425;GO:0044429;GO:0044430;GO:0044433;GO:0044444;GO:0044446;GO:0044456;GO:0044464;GO:…	FATEYCNTIEGTAK	14	2	1	FATEYC[125.0477]NTIEGTAK	FATEYC[130.0791]NTIEGTAK	C	1.75026	-2.1436	1.57863	NaN	2.50524	NaN	1.52524	1.28236	2.29994	1.2506	1.19808	1.47219	1.17428	-0.0990741	NaN	2.03054	0.643371	1.33634	1.84236	NaN	NaN	NaN	NaN	1.32198	1.41184	0.503058	1.44126	NaN	1.17734	NaN	0.242023
	+	0.114656	1.57712	0.526935	Q12805	EGF-containing fibulin-like extracellular matrix protein 1	EFEMP1	190	GO:0003008;GO:0006355;GO:0006464;GO:0006468;GO:0006793;GO:0006796;GO:0007165;GO:0007166;GO:0007167;GO:0007169;GO:0007173;GO:0007600;GO:0007601;GO:0008152;GO:0009889;GO:0009987;GO:0010468;GO:0010556;GO:0016043;GO:0016310;GO:0018108;GO:0018193;GO:0018212;GO:0019219;GO:0019222;GO:0019538;GO:0030198;GO:0031323;GO:0031326;GO:0032330;GO:0032331;GO:0032501;GO:0043062;GO:0043170;GO:0043412;GO:0044237;GO:…	GO:0003824;GO:0004672;GO:0004713;GO:0004714;GO:0004871;GO:0004872;GO:0004888;GO:0005006;GO:0005102;GO:0005154;GO:0005488;GO:0005509;GO:0005515;GO:0016301;GO:0016740;GO:0016772;GO:0016773;GO:0019199;GO:0038023;GO:0043167;GO:0043169;GO:0046872;GO:0060089;GO:0070851	GO:0005576;GO:0005578;GO:0005615;GO:0031012;GO:0031982;GO:0031988;GO:0043226;GO:0043227;GO:0043230;GO:0044421;GO:0065010;GO:0070062	ADQVCINLR	9	2	1	ADQVC[125.0477]INLR	ADQVC[130.0791]INLR	C	-0.56138	NaN	-1.12631	NaN	-2.03446	NaN	NaN	NaN	NaN	NaN	-0.97182	NaN	NaN	NaN	NaN	NaN	NaN	NaN	NaN	NaN	NaN	NaN	NaN	NaN	-0.959319	NaN	-0.895474	NaN	-1.19564	-2.07923	-2.23841
+	+	0.02	2.63702	0.523804	P08603	Complement factor H	CFH	494	GO:0002252;GO:0002253;GO:0002376;GO:0002673;GO:0002682;GO:0002684;GO:0002697;GO:0002920;GO:0006950;GO:0006952;GO:0006955;GO:0006956;GO:0006957;GO:0006959;GO:0008152;GO:0010468;GO:0019222;GO:0019538;GO:0030449;GO:0031347;GO:0032101;GO:0043170;GO:0044238;GO:0045087;GO:0048518;GO:0048583;GO:0048584;GO:0050727;GO:0050776;GO:0050778;GO:0050789;GO:0050896;GO:0051246;GO:0060255;GO:0065007;GO:0070613;GO:…	GO:0001871;GO:0001948;GO:0005488;GO:0005515;GO:0005539;GO:0008201;GO:0030246;GO:0030247;GO:0043394;GO:0043395	GO:0005576;GO:0005615;GO:0031982;GO:0031988;GO:0043226;GO:0043227;GO:0043230;GO:0044421;GO:0065010;GO:0070062;GO:0072562	LGYVTADGETSGSITCGK	18	2	1	LGYVTADGETSGSITC[125.0477]GK	LGYVTADGETSGSITC[130.0791]GK	C	NaN	-4.01594	-2.70083	-5.20186	-3.87065	-3.92917	NaN	-3.66301	-3.17844	-4.93501	-4.42085	NaN	-2.76817	-2.66863	-3.60395	-4.08181	-2.49556	NaN	-4.04857	-3.77766	-2.41952	-3.41425	-1.80394	-2.66106	NaN	-3.21838	-4.51689	-1.40984	-4.41692	-4.24613	-2.61038
+	+	0.00208	3.74685	0.519597	Q13838	Spliceosome RNA helicase DDX39B	DDX39B	300	GO:0000245;GO:0000375;GO:0000377;GO:0000398;GO:0006139;GO:0006355;GO:0006396;GO:0006397;GO:0006405;GO:0006406;GO:0006807;GO:0006810;GO:0006913;GO:0008152;GO:0008380;GO:0009889;GO:0009891;GO:0009893;GO:0009987;GO:0010468;GO:0010501;GO:0010556;GO:0010604;GO:0015931;GO:0016043;GO:0016070;GO:0016071;GO:0019048;GO:0019219;GO:0019222;GO:0022414;GO:0022415;GO:0022607;GO:0022618;GO:0031323;GO:0031325;GO:…	GO:0000166;GO:0003676;GO:0003723;GO:0003724;GO:0003824;GO:0004004;GO:0004386;GO:0005488;GO:0005515;GO:0005524;GO:0008026;GO:0008186;GO:0016462;GO:0016787;GO:0016817;GO:0016818;GO:0016887;GO:0017069;GO:0017070;GO:0017076;GO:0017111;GO:0030554;GO:0030621;GO:0032553;GO:0032555;GO:0032559;GO:0035639;GO:0042623;GO:0043008;GO:0070035	GO:0000346;GO:0005634;GO:0005654;GO:0005681;GO:0005730;GO:0005737;GO:0016604;GO:0016607;GO:0030529;GO:0032991;GO:0043226;GO:0043227;GO:0043228;GO:0043229;GO:0043231;GO:0043232;GO:0043234;GO:0044422;GO:0044424;GO:0044428;GO:0044446;GO:0044451;GO:0044464	CIALAQLLVEQNFPAIAIHR	20	3	1	C[125.0477]IALAQLLVEQNFPAIAIHR	C[130.0791]IALAQLLVEQNFPAIAIHR	C	3.64627	NaN	3.68467	NaN	2.98074	3.09156	NaN	2.72133	NaN	2.2822	2.7242	NaN	NaN	1.22159	2.4003	1.06131	2.57114	NaN	2.81083	NaN	2.7886	NaN	2.43762	2.69199	2.80846	NaN	-0.90774	1.79903	2.86233	2.69055	2.66882
	+	0.0768108	1.83858	0.509758	Q07021	Complement component 1 Q subcomponent-binding protein, mitochondrial	C1QBP	186	GO:0000122;GO:0001817;GO:0001818;GO:0002252;GO:0002253;GO:0002376;GO:0002673;GO:0002682;GO:0002683;GO:0002684;GO:0002685;GO:0002687;GO:0002688;GO:0002690;GO:0002697;GO:0002698;GO:0002831;GO:0002832;GO:0002920;GO:0006139;GO:0006351;GO:0006355;GO:0006357;GO:0006396;GO:0006397;GO:0006417;GO:0006807;GO:0006915;GO:0006950;GO:0006952;GO:0006955;GO:0006956;GO:0006958;GO:0006959;GO:0007165;GO:0007596;GO:…	GO:0000988;GO:0000989;GO:0001664;GO:0001846;GO:0001848;GO:0001849;GO:0001871;GO:0003676;GO:0003712;GO:0003714;GO:0003723;GO:0003729;GO:0005102;GO:0005488;GO:0005515;GO:0005539;GO:0005540;GO:0008134;GO:0030246;GO:0030247;GO:0030984;GO:0031690	GO:0005615;GO:0005634;GO:0005730;GO:0005737;GO:0005739;GO:0005759;GO:0005829;GO:0005886;GO:0009986;GO:0016020;GO:0031974;GO:0043226;GO:0043227;GO:0043228;GO:0043229;GO:0043231;GO:0043232;GO:0043233;GO:0044421;GO:0044422;GO:0044424;GO:0044428;GO:0044429;GO:0044444;GO:0044446;GO:0044464;GO:0070013	ALVLDCHYPEDEVGQEDEAESDIFSIR	27	3	1	ALVLDC[125.0477]HYPEDEVGQEDEAESDIFSIR	ALVLDC[130.0791]HYPEDEVGQEDEAESDIFSIR	C	NaN	NaN	NaN	2.47212	NaN	NaN	NaN	2.07452	NaN	2.032	NaN	1.7241	NaN	NaN	NaN	2.36135	NaN	1.97878	NaN	NaN	NaN	5.06678	2.81487	1.64272	NaN	1.78504	3.58231	1.43144	3.53898	NaN	2.58141
	+	0.12401	1.53146	0.508824	P21333	Filamin-A	FLNA	2107	GO:0000226;GO:0000902;GO:0000904;GO:0001775;GO:0001837;GO:0002576;GO:0006139;GO:0006140;GO:0006351;GO:0006355;GO:0006356;GO:0006366;GO:0006807;GO:0006810;GO:0006887;GO:0006996;GO:0007010;GO:0007015;GO:0007017;GO:0007051;GO:0007052;GO:0007155;GO:0007165;GO:0007166;GO:0007186;GO:0007187;GO:0007188;GO:0007193;GO:0007194;GO:0007195;GO:0007212;GO:0007264;GO:0007596;GO:0007599;GO:0008104;GO:0008152;GO:…	GO:0001948;GO:0003779;GO:0004871;GO:0005102;GO:0005488;GO:0005515;GO:0008092;GO:0008134;GO:0017016;GO:0017048;GO:0017160;GO:0019899;GO:0031267;GO:0034987;GO:0034988;GO:0042802;GO:0042803;GO:0046983;GO:0048365;GO:0051015;GO:0051020;GO:0060089	GO:0005576;GO:0005634;GO:0005737;GO:0005802;GO:0005829;GO:0005856;GO:0005884;GO:0005886;GO:0005912;GO:0005924;GO:0005925;GO:0015629;GO:0016020;GO:0030054;GO:0030055;GO:0030863;GO:0031523;GO:0031982;GO:0031988;GO:0032991;GO:0043025;GO:0043198;GO:0043226;GO:0043227;GO:0043228;GO:0043229;GO:0043230;GO:0043231;GO:0043232;GO:0043234;GO:0044297;GO:0044421;GO:0044422;GO:0044424;GO:0044427;GO:0044428;GO:…	VTYCPTEPGNYIINIK	16	2;3	1	VTYC[125.0477]PTEPGNYIINIK	VTYC[130.0791]PTEPGNYIINIK	C	0.0662364	NaN	0.133104	-1.16656	0.438201	-0.263618	1.56295	-4.91717	-0.114053	-0.981057	0.119842	0.390053	0.205666	-4.48453	-0.146444	-4.77133	0.0562505	-0.149919	-4.71388	-1.23588	1.26037	-0.0456058	-0.0814566	-0.454435	-0.018172	-3.20901	0.124799	-0.0713136	-0.113292	-0.51754	-4.35017
	+	0.133324	1.48125	0.505312	Q16555	Dihydropyrimidinase-related protein 2	DPYSL2	248	GO:0001558;GO:0001975;GO:0006139;GO:0006807;GO:0006810;GO:0006897;GO:0006935;GO:0006996;GO:0007010;GO:0007165;GO:0007399;GO:0007411;GO:0008152;GO:0009605;GO:0009719;GO:0009987;GO:0010033;GO:0010243;GO:0010324;GO:0010646;GO:0010769;GO:0010975;GO:0014048;GO:0014049;GO:0014070;GO:0014073;GO:0014075;GO:0016043;GO:0016044;GO:0016192;GO:0021510;GO:0021772;GO:0022603;GO:0022604;GO:0023051;GO:0030516;GO:…	GO:0003824;GO:0004157;GO:0016787;GO:0016810;GO:0016812	GO:0005739;GO:0005829;GO:0005856;GO:0016020;GO:0030425;GO:0030426;GO:0030427;GO:0031982;GO:0031988;GO:0032991;GO:0033267;GO:0042995;GO:0043005;GO:0043025;GO:0043195;GO:0043226;GO:0043227;GO:0043228;GO:0043229;GO:0043230;GO:0043231;GO:0043232;GO:0043234;GO:0044297;GO:0044421;GO:0044424;GO:0044444;GO:0044456;GO:0044463;GO:0044464;GO:0065010;GO:0070062	AITIANQTNCPLYITK	16	2	1	AITIANQTNC[125.0477]PLYITK	AITIANQTNC[130.0791]PLYITK	C	-0.469288	NaN	-0.975124	NaN	-0.726718	-0.867495	-0.999233	NaN	3.74427	-0.401176	-0.182614	0.195154	-1.13449	-1.062	-0.637061	-0.944074	-1.07781	-1.61824	-0.760864	NaN	5.16115	1.26077	0.0949221	-0.735471	-1.06685	-0.567106	-1.01429	-0.0997	-1.2066	-1.15207	-1.14482
+	+	0.0132464	2.85999	0.501851	Q96AE4	Far upstream element-binding protein 1	FUBP1	148	GO:0006139;GO:0006351;GO:0006366;GO:0006807;GO:0008152;GO:0009058;GO:0009059;GO:0009893;GO:0009987;GO:0010468;GO:0010604;GO:0010628;GO:0016070;GO:0019222;GO:0032774;GO:0034641;GO:0034645;GO:0043170;GO:0044237;GO:0044238;GO:0044249;GO:0044260;GO:0048518;GO:0050789;GO:0060255;GO:0065007;GO:0090304	GO:0001071;GO:0003676;GO:0003677;GO:0003697;GO:0003700;GO:0005488;GO:0043566	GO:0005634;GO:0005654;GO:0043226;GO:0043227;GO:0043229;GO:0043231;GO:0044422;GO:0044424;GO:0044428;GO:0044446;GO:0044464	SCMLTGTPESVQSAK	15	2	1	SC[125.0477]MLTGTPESVQSAK	SC[130.0791]MLTGTPESVQSAK	C	0.721085	NaN	0.147808	-0.719177	NaN	0.648348	0.144155	0.0192851	NaN	-0.989052	NaN	-1.36477	1.2742	1.66175	0.52162	1.51506	0.532249	1.24974	NaN	NaN	NaN	-0.264459	0.688032	-0.163958	NaN	0.589685	NaN	0.625313	1.01257	NaN	1.02124
+	+	0.000571429	4.46548	0.497658	P63261	Actin, cytoplasmic 2	ACTG1	257;272	GO:0001894;GO:0001895;GO:0002376;GO:0006928;GO:0006935;GO:0006950;GO:0006952;GO:0006955;GO:0006996;GO:0007010;GO:0007155;GO:0007165;GO:0007166;GO:0007167;GO:0007169;GO:0007264;GO:0007411;GO:0009605;GO:0009987;GO:0010033;GO:0016043;GO:0016337;GO:0022607;GO:0022610;GO:0030029;GO:0030036;GO:0031032;GO:0034109;GO:0034329;GO:0034330;GO:0034332;GO:0035556;GO:0035924;GO:0040011;GO:0042221;GO:0042330;GO:…	GO:0000166;GO:0005198;GO:0005200;GO:0005488;GO:0005515;GO:0005524;GO:0017076;GO:0019899;GO:0030554;GO:0031625;GO:0032553;GO:0032555;GO:0032559;GO:0035639;GO:0042802	GO:0005615;GO:0005634;GO:0005829;GO:0005856;GO:0005886;GO:0016020;GO:0030016;GO:0031941;GO:0031982;GO:0031988;GO:0032991;GO:0043226;GO:0043227;GO:0043228;GO:0043229;GO:0043230;GO:0043231;GO:0043232;GO:0043234;GO:0043292;GO:0044421;GO:0044422;GO:0044424;GO:0044430;GO:0044444;GO:0044446;GO:0044464;GO:0065010;GO:0070062;GO:0072562	CPEALFQPSFLGMESCGIHETTFNSIMK	28	3	2	C[125.0477]PEALFQPSFLGMESC[125.0477]GIHETTFNSIMK	C[130.0791]PEALFQPSFLGMESC[130.0791]GIHETTFNSIMK	C;C	0.618639	-0.234139	0.502456	0.690921	1.50866	1.302	0.529772	0.841098	0.768389	1.1516	1.39144	0.37156	1.54898	1.47932	1.81697	1.47118	1.48738	0.495472	1.59556	0.529297	2.8545	0.639729	0.239466	1.67938	0.382717	1.21793	1.13013	0.483011	1.1862	1.4145	1.31423
	+	0.104676	1.62307	0.475376	P52597	Heterogeneous nuclear ribonucleoprotein F	HNRNPF	267	GO:0000375;GO:0000377;GO:0000398;GO:0006139;GO:0006396;GO:0006397;GO:0006807;GO:0008152;GO:0008380;GO:0009987;GO:0010467;GO:0010468;GO:0016070;GO:0016071;GO:0019219;GO:0019222;GO:0031323;GO:0034641;GO:0043170;GO:0043484;GO:0044237;GO:0044238;GO:0044260;GO:0050789;GO:0050794;GO:0051171;GO:0051252;GO:0060255;GO:0065007;GO:0080090;GO:0090304	GO:0000166;GO:0003676;GO:0003723;GO:0003727;GO:0005488	GO:0005634;GO:0005654;GO:0005681;GO:0016020;GO:0030529;GO:0032991;GO:0043226;GO:0043227;GO:0043229;GO:0043231;GO:0044422;GO:0044424;GO:0044428;GO:0044446;GO:0044464;GO:0071013	DLSYCLSGMYDHR	13	2	1	DLSYC[125.0477]LSGMYDHR	DLSYC[130.0791]LSGMYDHR	C	0.0536639	NaN	NaN	NaN	NaN	NaN	NaN	NaN	NaN	NaN	NaN	NaN	0.00841255	0.231482	1.44325	0.263193	-0.0217484	0.419349	1.01563	NaN	NaN	NaN	NaN	3.25346	NaN	0.994742	NaN	-0.309005	0.80474	NaN	NaN
+	+	0.00934375	3.01822	0.473805	P02730	Band 3 anion transport protein	SLC4A1	885	GO:0006810;GO:0006811;GO:0006820;GO:0006821;GO:0006873;GO:0006885;GO:0008152;GO:0009987;GO:0015698;GO:0015701;GO:0015711;GO:0019725;GO:0030003;GO:0030004;GO:0030641;GO:0042592;GO:0044281;GO:0048878;GO:0050801;GO:0051234;GO:0051453;GO:0055067;GO:0055080;GO:0055082;GO:0055085;GO:0065007;GO:0065008	GO:0005215;GO:0005452;GO:0005488;GO:0005515;GO:0008092;GO:0008509;GO:0015075;GO:0015103;GO:0015106;GO:0015108;GO:0015291;GO:0015297;GO:0015300;GO:0015301;GO:0022804;GO:0022857;GO:0022891;GO:0022892;GO:0030506;GO:0042802;GO:0042803;GO:0043495;GO:0046983	GO:0005856;GO:0005886;GO:0005887;GO:0016020;GO:0016021;GO:0016323;GO:0030018;GO:0030863;GO:0031224;GO:0031226;GO:0031982;GO:0031988;GO:0043226;GO:0043227;GO:0043228;GO:0043229;GO:0043230;GO:0043232;GO:0044421;GO:0044422;GO:0044424;GO:0044425;GO:0044444;GO:0044448;GO:0044449;GO:0044459;GO:0044464;GO:0065010;GO:0070062;GO:0072562	NVELQCLDADDAK	13	2	1	NVELQC[125.0477]LDADDAK	NVELQC[130.0791]LDADDAK	C	1.6592	1.08366	1.29062	NaN	1.40923	0.397356	1.13417	2.11291	1.49566	0.761729	1.83605	1.88098	-0.00974115	-0.620679	1.19285	0.273274	0.711286	NaN	0.687055	1.66888	NaN	0.803018	0.512558	1.14699	1.72917	-0.25943	1.25939	1.98105	0.84048	1.25975	0.698656
+	+	0.0015	3.94439	0.47215	Q14204	Cytoplasmic dynein 1 heavy chain 1	DYNC1H1	1977	GO:0000086;GO:0000226;GO:0000278;GO:0002376;GO:0002478;GO:0002495;GO:0002504;GO:0006810;GO:0006928;GO:0006996;GO:0007010;GO:0007017;GO:0007018;GO:0007049;GO:0007051;GO:0007052;GO:0009987;GO:0016043;GO:0019882;GO:0019884;GO:0019886;GO:0022402;GO:0022607;GO:0022618;GO:0033962;GO:0034063;GO:0034621;GO:0034622;GO:0043933;GO:0048002;GO:0051234;GO:0051293;GO:0051649;GO:0051656;GO:0065003;GO:0071826;GO:…	GO:0000166;GO:0003774;GO:0003777;GO:0003824;GO:0005488;GO:0005524;GO:0016462;GO:0016787;GO:0016817;GO:0016818;GO:0016887;GO:0017076;GO:0017111;GO:0030554;GO:0032553;GO:0032555;GO:0032559;GO:0035639	GO:0005813;GO:0005815;GO:0005829;GO:0005868;GO:0005874;GO:0005875;GO:0016020;GO:0030175;GO:0030286;GO:0031982;GO:0031988;GO:0032991;GO:0042995;GO:0043226;GO:0043227;GO:0043228;GO:0043229;GO:0043230;GO:0043232;GO:0043234;GO:0044421;GO:0044422;GO:0044424;GO:0044430;GO:0044444;GO:0044446;GO:0044464;GO:0065010;GO:0070062	MLSAVSQQVQCIQEALR	17	2	1	MLSAVSQQVQC[125.0477]IQEALR	MLSAVSQQVQC[130.0791]IQEALR	C	0.267723	NaN	-0.244674	NaN	0.0794067	-0.400765	NaN	-0.00115679	0.0654983	-0.507883	0.547094	NaN	0.0215961	0.532881	-1.12499	-0.350449	-0.135615	-0.426739	NaN	NaN	NaN	NaN	NaN	NaN	-0.213071	-0.686389	0.399669	-0.593293	0.401478	NaN	NaN
+	+	0.00212987	3.73222	0.470648	Q04760	Lactoylglutathione lyase	GLO1	139	GO:0002521;GO:0002573;GO:0005975;GO:0006081;GO:0006082;GO:0006355;GO:0006357;GO:0006518;GO:0006520;GO:0006575;GO:0006749;GO:0006790;GO:0006807;GO:0008152;GO:0009308;GO:0009438;GO:0009889;GO:0009987;GO:0010468;GO:0010556;GO:0010941;GO:0019219;GO:0019222;GO:0019752;GO:0030099;GO:0030154;GO:0030316;GO:0031323;GO:0031326;GO:0032502;GO:0034641;GO:0042180;GO:0042981;GO:0043066;GO:0043067;GO:0043069;GO:…	GO:0003824;GO:0004462;GO:0005488;GO:0008270;GO:0016829;GO:0016846;GO:0043167;GO:0043169;GO:0046872;GO:0046914	GO:0005737;GO:0031982;GO:0031988;GO:0043226;GO:0043227;GO:0043230;GO:0044421;GO:0044424;GO:0044464;GO:0065010;GO:0070062	GFGHIGIAVPDVYSACK	17	2;3	1	GFGHIGIAVPDVYSAC[125.0477]K	GFGHIGIAVPDVYSAC[130.0791]K	C	-0.150566	-1.03975	-0.647776	-0.715644	-0.306534	-0.886873	-0.245113	-0.959005	-0.989993	-1.12588	-0.751329	-0.00565848	NaN	NaN	-1.12439	-0.522339	-0.306232	-1.31496	0.199094	NaN	0.475809	-0.362026	-0.241293	NaN	0.730177	-0.941192	NaN	-0.69506	-0.345772	0.0809109	0.126562
	+	0.128784	1.50396	0.468872	O75369	Filamin-B	FLNB	2431	GO:0006996;GO:0007010;GO:0007016;GO:0007165;GO:0007166;GO:0007519;GO:0009888;GO:0009987;GO:0010033;GO:0014706;GO:0016043;GO:0019221;GO:0030029;GO:0030036;GO:0030154;GO:0032502;GO:0032507;GO:0034097;GO:0042221;GO:0045185;GO:0048856;GO:0048869;GO:0050789;GO:0050794;GO:0050896;GO:0051235;GO:0051651;GO:0051716;GO:0060537;GO:0065007;GO:0065008;GO:0070887;GO:0071310;GO:0071345;GO:0071840;GO:0071841;GO:…	GO:0003779;GO:0005488;GO:0005515;GO:0008092;GO:0042802	GO:0001725;GO:0005737;GO:0005829;GO:0005856;GO:0005886;GO:0005912;GO:0005924;GO:0005925;GO:0005938;GO:0015629;GO:0016020;GO:0016021;GO:0030018;GO:0030054;GO:0030055;GO:0031224;GO:0031982;GO:0031988;GO:0032432;GO:0042641;GO:0043226;GO:0043227;GO:0043228;GO:0043229;GO:0043230;GO:0043232;GO:0044421;GO:0044422;GO:0044424;GO:0044425;GO:0044430;GO:0044444;GO:0044446;GO:0044449;GO:0044464;GO:0065010;GO:…	MDCQETPEGYK	11	2	1	MDC[125.0477]QETPEGYK	MDC[130.0791]QETPEGYK	C	NaN	NaN	NaN	NaN	NaN	NaN	NaN	NaN	NaN	NaN	1.63266	NaN	NaN	1.15151	NaN	0.801535	NaN	1.06953	NaN	NaN	NaN	NaN	NaN	1.16146	NaN	NaN	NaN	NaN	NaN	NaN	NaN
+	+	0.000608696	4.40078	0.455737	P62873	Guanine nucleotide-binding protein G(I)/G(S)/G(T) subunit beta-1	GNB1	294	GO:0001666;GO:0001775;GO:0003008;GO:0006091;GO:0006112;GO:0006140;GO:0006873;GO:0006874;GO:0006875;GO:0006915;GO:0006950;GO:0007154;GO:0007165;GO:0007166;GO:0007186;GO:0007187;GO:0007188;GO:0007189;GO:0007190;GO:0007191;GO:0007200;GO:0007202;GO:0007204;GO:0007212;GO:0007213;GO:0007264;GO:0007265;GO:0007267;GO:0007268;GO:0007596;GO:0007599;GO:0007600;GO:0007602;GO:0007603;GO:0007606;GO:0008152;GO:…	GO:0003824;GO:0003924;GO:0004871;GO:0005488;GO:0005515;GO:0016462;GO:0016787;GO:0016817;GO:0016818;GO:0017111;GO:0019899;GO:0032403;GO:0051020;GO:0060089	GO:0001917;GO:0005622;GO:0005765;GO:0005774;GO:0005834;GO:0005886;GO:0016020;GO:0019897;GO:0019898;GO:0030425;GO:0031090;GO:0031234;GO:0031982;GO:0031988;GO:0032991;GO:0042622;GO:0042995;GO:0043005;GO:0043226;GO:0043227;GO:0043230;GO:0043234;GO:0044297;GO:0044421;GO:0044422;GO:0044424;GO:0044425;GO:0044437;GO:0044441;GO:0044444;GO:0044446;GO:0044459;GO:0044463;GO:0044464;GO:0065010;GO:0070062	LLLAGYDDFNCNVWDALK	18	2	1	LLLAGYDDFNC[125.0477]NVWDALK	LLLAGYDDFNC[130.0791]NVWDALK	C	0.654694	-2.52822	0.557306	NaN	0.147855	-0.594468	0.83347	0.285246	0.456706	-0.153282	-0.101709	-0.320562	-0.130051	0.544939	0.761886	0.294798	0.849003	-0.230291	0.660444	-2.02379	1.05176	0.370047	0.719002	-0.194588	-0.0482199	0.319186	-0.228313	0.610712	-0.274102	0.351403	0.133536
+	+	0.000945455	4.14728	0.4529	P48059	LIM and senescent cell antigen-like-containing domain protein 1	LIMS1	138	GO:0001952;GO:0001954;GO:0006140;GO:0006355;GO:0007568;GO:0007569;GO:0009719;GO:0009889;GO:0009890;GO:0009892;GO:0009893;GO:0009894;GO:0009987;GO:0010033;GO:0010468;GO:0010556;GO:0010558;GO:0010604;GO:0010605;GO:0010628;GO:0010629;GO:0010810;GO:0010811;GO:0016043;GO:0019219;GO:0019222;GO:0022607;GO:0030155;GO:0030811;GO:0031323;GO:0031324;GO:0031326;GO:0031327;GO:0031329;GO:0032502;GO:0033121;GO:…	GO:0005488;GO:0005515;GO:0008270;GO:0019899;GO:0019900;GO:0019901;GO:0043167;GO:0043169;GO:0046872;GO:0046914	GO:0005829;GO:0005886;GO:0005911;GO:0005912;GO:0005924;GO:0005925;GO:0016020;GO:0030054;GO:0030055;GO:0044424;GO:0044444;GO:0044464;GO:0048471;GO:0070161	CHAIIDEQPLIFK	13	2	1	C[125.0477]HAIIDEQPLIFK	C[130.0791]HAIIDEQPLIFK	C	3.59371	NaN	3.0776	NaN	NaN	NaN	2.82573	0.790548	NaN	NaN	2.40717	1.75881	1.90007	2.13499	2.42435	2.04801	2.4312	2.19389	2.76413	NaN	NaN	3.15542	2.68331	2.95277	2.19926	1.78833	3.3647	1.49222	3.01515	3.1153	3.24562
	+	0.0505323	2.07701	0.451358	P00738	Haptoglobin	HP	381	GO:0000302;GO:0002376;GO:0002526;GO:0006810;GO:0006897;GO:0006898;GO:0006950;GO:0006952;GO:0006953;GO:0006954;GO:0006979;GO:0009607;GO:0009611;GO:0009617;GO:0009892;GO:0009894;GO:0009895;GO:0009987;GO:0010035;GO:0010310;GO:0010324;GO:0010727;GO:0010941;GO:0010942;GO:0016043;GO:0016044;GO:0016192;GO:0019222;GO:0031323;GO:0031324;GO:0031329;GO:0031330;GO:0042221;GO:0042542;GO:0042742;GO:0043086;GO:…	GO:0003824;GO:0005488;GO:0005515;GO:0016209;GO:0030492	GO:0005576;GO:0005615;GO:0031838;GO:0031974;GO:0031982;GO:0031983;GO:0031988;GO:0032991;GO:0043226;GO:0043227;GO:0043230;GO:0043233;GO:0043234;GO:0044421;GO:0044422;GO:0044424;GO:0044433;GO:0044444;GO:0044446;GO:0044464;GO:0060205;GO:0065010;GO:0070062;GO:0071682;GO:0072562	SCAVAEYGVYVK	12	2	1	SC[125.0477]AVAEYGVYVK	SC[130.0791]AVAEYGVYVK	C	-2.99268	-4.57603	-3.07313	NaN	-3.26308	-4.60489	-3.22212	-2.48881	-1.62225	-4.28213	-3.40538	NaN	-2.39041	-1.70651	-1.78777	-2.51714	-2.31116	NaN	-2.60747	-1.85043	NaN	NaN	-2.59358	-2.31637	-3.0245	-2.81945	-3.22244	-2.09274	-3.25075	-2.98718	-1.3305
	+	0.138552	1.45752	0.447752	Q86UP2	Kinectin	KTN1	303	GO:0006928;GO:0007017;GO:0007018;GO:0007165;GO:0007264;GO:0009987;GO:0035556;GO:0050789;GO:0050794;GO:0050896;GO:0051716;GO:0065007		GO:0005783;GO:0005789;GO:0005887;GO:0016020;GO:0016021;GO:0031090;GO:0031224;GO:0031226;GO:0043226;GO:0043227;GO:0043229;GO:0043231;GO:0044422;GO:0044424;GO:0044425;GO:0044432;GO:0044444;GO:0044446;GO:0044459;GO:0044464	TMMFSEDEALCVVDLLK	17	2	1	TMMFSEDEALC[125.0477]VVDLLK	TMMFSEDEALC[130.0791]VVDLLK	C	0.973044	NaN	1.69091	1.79896	1.43192	1.30264	2.19964	1.42497	NaN	1.8397	NaN	NaN	0.667691	0.994204	NaN	0.637309	NaN	0.933513	NaN	NaN	NaN	1.24976	3.96312	NaN	1.04325	1.25504	0.937867	NaN	2.50254	NaN	NaN
	+	0.0772133	1.83082	0.447731	P63261	Actin, cytoplasmic 2	ACTG1	257;281	GO:0001894;GO:0001895;GO:0002376;GO:0006928;GO:0006935;GO:0006950;GO:0006952;GO:0006955;GO:0006996;GO:0007010;GO:0007155;GO:0007165;GO:0007166;GO:0007167;GO:0007169;GO:0007264;GO:0007411;GO:0009605;GO:0009987;GO:0010033;GO:0016043;GO:0016337;GO:0022607;GO:0022610;GO:0030029;GO:0030036;GO:0031032;GO:0034109;GO:0034329;GO:0034330;GO:0034332;GO:0035556;GO:0035924;GO:0040011;GO:0042221;GO:0042330;GO:…	GO:0000166;GO:0005198;GO:0005200;GO:0005488;GO:0005515;GO:0005524;GO:0017076;GO:0019899;GO:0030554;GO:0031625;GO:0032553;GO:0032555;GO:0032559;GO:0035639;GO:0042802	GO:0005615;GO:0005634;GO:0005829;GO:0005856;GO:0005886;GO:0016020;GO:0030016;GO:0031941;GO:0031982;GO:0031988;GO:0032991;GO:0043226;GO:0043227;GO:0043228;GO:0043229;GO:0043230;GO:0043231;GO:0043232;GO:0043234;GO:0043292;GO:0044421;GO:0044422;GO:0044424;GO:0044430;GO:0044444;GO:0044446;GO:0044464;GO:0065010;GO:0070062;GO:0072562	CPEALFQPSFLGM[15.9949]ESCGIHETTFNSIMK	28	3	2	C[125.0477]PEALFQPSFLGM[15.9949]ESC[125.0477]GIHETTFNSIMK	C[130.0791]PEALFQPSFLGM[15.9949]ESC[130.0791]GIHETTFNSIMK	C;C	-0.374322	-1.34316	0.725939	-0.141577	0.490703	1.24027	0.606338	-0.100791	1.05911	-0.602456	0.297174	1.01853	0.586156	0.674001	0.63375	0.340874	0.572514	-0.130734	0.569917	NaN	NaN	0.366855	-0.206981	0.887143	0.151434	-0.303836	-0.435799	-3.3997	0.185012	0.350209	0.100496
+	+	0.02	2.63895	0.446424	P00505	Aspartate aminotransferase, mitochondrial	GOT2	106	GO:0005975;GO:0005996;GO:0006006;GO:0006066;GO:0006082;GO:0006094;GO:0006103;GO:0006106;GO:0006107;GO:0006520;GO:0006531;GO:0006532;GO:0006533;GO:0006536;GO:0006538;GO:0006575;GO:0006807;GO:0006810;GO:0006869;GO:0008152;GO:0008652;GO:0009056;GO:0009058;GO:0009063;GO:0009064;GO:0009065;GO:0009066;GO:0009067;GO:0009068;GO:0009308;GO:0009309;GO:0009310;GO:0009987;GO:0010033;GO:0015718;GO:0015849;GO:…	GO:0003824;GO:0004069;GO:0005488;GO:0008483;GO:0016212;GO:0016740;GO:0016769;GO:0019842;GO:0030170;GO:0048037;GO:0070279;GO:0070546;GO:0080130	GO:0005739;GO:0005743;GO:0005759;GO:0005886;GO:0016020;GO:0019866;GO:0031090;GO:0031966;GO:0031974;GO:0031982;GO:0031988;GO:0043226;GO:0043227;GO:0043229;GO:0043230;GO:0043231;GO:0043233;GO:0044421;GO:0044422;GO:0044424;GO:0044429;GO:0044444;GO:0044446;GO:0044464;GO:0065010;GO:0070013;GO:0070062	EYLPIGGLAEFCK	13	2	1	EYLPIGGLAEFC[125.0477]K	EYLPIGGLAEFC[130.0791]K	C	NaN	NaN	1.0443	NaN	NaN	0.850317	NaN	1.04758	NaN	NaN	NaN	0.893392	0.778663	1.1337	1.64722	0.810347	0.986497	1.2041	1.74242	NaN	NaN	NaN	1.25906	1.42178	1.26786	1.76148	NaN	1.54148	1.73226	1.61557	1.83967
	+	0.129281	1.49933	0.444238	P46777	60S ribosomal protein L5	RPL5	76	GO:0000184;GO:0000956;GO:0006139;GO:0006364;GO:0006396;GO:0006401;GO:0006402;GO:0006412;GO:0006413;GO:0006414;GO:0006415;GO:0006605;GO:0006612;GO:0006613;GO:0006614;GO:0006807;GO:0006810;GO:0006886;GO:0008152;GO:0009056;GO:0009057;GO:0009058;GO:0009059;GO:0009987;GO:0010467;GO:0015031;GO:0016032;GO:0016043;GO:0016070;GO:0016071;GO:0016072;GO:0019058;GO:0019083;GO:0019538;GO:0022411;GO:0022414;GO:…	GO:0003676;GO:0003723;GO:0003735;GO:0005198;GO:0005488;GO:0008097;GO:0019843	GO:0005634;GO:0005730;GO:0005737;GO:0005829;GO:0005912;GO:0005924;GO:0005925;GO:0015934;GO:0016020;GO:0022625;GO:0030054;GO:0030055;GO:0030529;GO:0031982;GO:0031988;GO:0032991;GO:0043226;GO:0043227;GO:0043228;GO:0043229;GO:0043230;GO:0043231;GO:0043232;GO:0044421;GO:0044422;GO:0044424;GO:0044428;GO:0044444;GO:0044446;GO:0044464;GO:0065010;GO:0070062;GO:0070161	IEGDMIVCAAYAHELPK	17	2;3	1	IEGDMIVC[125.0477]AAYAHELPK	IEGDMIVC[130.0791]AAYAHELPK	C	NaN	NaN	0.612377	NaN	NaN	0.707482	NaN	-0.726212	NaN	-3.0541	NaN	1.1383	-0.657123	-0.907294	-0.68771	-0.187771	-0.0763066	0.273002	NaN	NaN	NaN	NaN	NaN	NaN	NaN	0.593394	NaN	0.690252	2.60012	NaN	NaN
	+	0.0543281	2.03607	0.443647	P27487	Dipeptidyl peptidase 4	DPP4	472	GO:0001666;GO:0001775;GO:0002376;GO:0002682;GO:0002684;GO:0002694;GO:0002696;GO:0006928;GO:0006950;GO:0008284;GO:0009987;GO:0010715;GO:0010716;GO:0016477;GO:0022407;GO:0030155;GO:0030260;GO:0031294;GO:0031295;GO:0033628;GO:0033632;GO:0040011;GO:0042110;GO:0042127;GO:0042221;GO:0043542;GO:0044409;GO:0044419;GO:0045321;GO:0046649;GO:0046718;GO:0048518;GO:0048519;GO:0048522;GO:0048523;GO:0048870;GO:…	GO:0001618;GO:0002020;GO:0003824;GO:0004175;GO:0004252;GO:0004872;GO:0005102;GO:0005488;GO:0005515;GO:0008233;GO:0008236;GO:0008238;GO:0008239;GO:0016787;GO:0017171;GO:0019899;GO:0042802;GO:0042803;GO:0046983;GO:0070011	GO:0005765;GO:0005774;GO:0005886;GO:0005911;GO:0005912;GO:0005924;GO:0005925;GO:0009986;GO:0016020;GO:0016021;GO:0016023;GO:0016324;GO:0030027;GO:0030054;GO:0030055;GO:0030139;GO:0031090;GO:0031224;GO:0031253;GO:0031256;GO:0031258;GO:0031410;GO:0031982;GO:0031988;GO:0042995;GO:0043226;GO:0043227;GO:0043229;GO:0043230;GO:0043231;GO:0044421;GO:0044422;GO:0044424;GO:0044425;GO:0044437;GO:0044444;GO:…	CSGPGLPLYTLHSSVNDK	18	2	1	C[125.0477]SGPGLPLYTLHSSVNDK	C[130.0791]SGPGLPLYTLHSSVNDK	C	NaN	NaN	NaN	NaN	NaN	-2.32879	NaN	NaN	NaN	NaN	-1.63536	NaN	NaN	NaN	NaN	-2.23156	-1.81172	NaN	NaN	NaN	-1.88319	-2.71972	NaN	-2.88171	NaN	NaN	NaN	NaN	-0.962312	-2.51541	-2.18108
	+	0.138976	1.45483	0.443368	O95336	6-phosphogluconolactonase	PGLS	78	GO:0005975;GO:0005996;GO:0006006;GO:0006007;GO:0006066;GO:0006098;GO:0006139;GO:0006732;GO:0006733;GO:0006739;GO:0006740;GO:0006753;GO:0006807;GO:0008152;GO:0009051;GO:0009056;GO:0009117;GO:0009987;GO:0016052;GO:0019318;GO:0019320;GO:0019321;GO:0019362;GO:0034641;GO:0044237;GO:0044238;GO:0044262;GO:0044275;GO:0044281;GO:0044282;GO:0046164;GO:0046365;GO:0046483;GO:0046496;GO:0051186;GO:0055086;GO:…	GO:0003824;GO:0005488;GO:0005529;GO:0016787;GO:0016788;GO:0017057;GO:0030246;GO:0048029;GO:0052689	GO:0005829;GO:0031982;GO:0031988;GO:0043226;GO:0043227;GO:0043230;GO:0044421;GO:0044424;GO:0044444;GO:0044464;GO:0065010;GO:0070062	WTLGFCDER	9	2	1	WTLGFC[125.0477]DER	WTLGFC[130.0791]DER	C	1.05448	NaN	0.868716	0.980795	1.5194	0.973786	1.13415	0.75643	4.3963	0.219299	1.99796	1.64901	1.82562	0.936131	NaN	1.63494	1.93623	NaN	2.98701	NaN	0.945241	1.01453	1.65575	3.36868	NaN	0.935111	1.55058	-0.786023	1.41347	1.92206	NaN
	+	0.0995698	1.66988	0.442427	Q9NVA2	Septin-11	SEPTIN11	300	GO:0006461;GO:0007049;GO:0009987;GO:0016043;GO:0022607;GO:0043933;GO:0051259;GO:0051291;GO:0051301;GO:0065003;GO:0071822;GO:0071840	GO:0000166;GO:0005488;GO:0005525;GO:0017076;GO:0019001;GO:0032553;GO:0032555;GO:0032561;GO:0035639	GO:0001725;GO:0005737;GO:0030054;GO:0030424;GO:0031982;GO:0031988;GO:0032432;GO:0042641;GO:0042995;GO:0043005;GO:0043197;GO:0043226;GO:0043227;GO:0043230;GO:0044309;GO:0044421;GO:0044422;GO:0044424;GO:0044430;GO:0044446;GO:0044463;GO:0044464;GO:0045202;GO:0065010;GO:0070062	CKLEEMGFK	9	2	1	C[125.0477]KLEEMGFK	C[130.0791]KLEEMGFK	C	-0.462102	NaN	-0.518299	NaN	NaN	-1.20131	NaN	NaN	NaN	NaN	NaN	-0.0573435	NaN	-0.776045	NaN	NaN	NaN	-0.754585	NaN	NaN	NaN	NaN	NaN	NaN	-0.573753	-1.85133	NaN	NaN	NaN	NaN	NaN
	+	0.0816623	1.79559	0.439929	O43491	Band 4.1-like protein 2	EPB41L2	314	GO:0006996;GO:0007010;GO:0009987;GO:0016043;GO:0030029;GO:0030036;GO:0030865;GO:0030866;GO:0071840;GO:0071841;GO:0071842	GO:0005198	GO:0005634;GO:0005654;GO:0005886;GO:0005912;GO:0005924;GO:0005925;GO:0008091;GO:0016020;GO:0019898;GO:0030054;GO:0030055;GO:0031982;GO:0031988;GO:0043226;GO:0043227;GO:0043229;GO:0043230;GO:0043231;GO:0044421;GO:0044422;GO:0044424;GO:0044425;GO:0044428;GO:0044430;GO:0044444;GO:0044446;GO:0044448;GO:0044464;GO:0065010;GO:0070062;GO:0070161	YFLCLQLR	8	2	1	YFLC[125.0477]LQLR	YFLC[130.0791]LQLR	C	NaN	NaN	0.490144	NaN	0.57536	-1.10245	NaN	NaN	NaN	NaN	0.413794	NaN	NaN	0.538055	0.964162	0.288003	0.668037	NaN	NaN	NaN	NaN	NaN	NaN	0.0573712	NaN	NaN	NaN	NaN	-0.0477565	NaN	NaN
	+	0.101254	1.65575	0.439132	P30050	60S ribosomal protein L12	RPL12	17	GO:0000184;GO:0000956;GO:0006139;GO:0006401;GO:0006402;GO:0006412;GO:0006413;GO:0006414;GO:0006415;GO:0006605;GO:0006612;GO:0006613;GO:0006614;GO:0006807;GO:0006810;GO:0006886;GO:0008152;GO:0009056;GO:0009057;GO:0009058;GO:0009059;GO:0009987;GO:0010467;GO:0015031;GO:0016032;GO:0016043;GO:0016070;GO:0016071;GO:0019058;GO:0019083;GO:0019538;GO:0022411;GO:0022414;GO:0022415;GO:0032774;GO:0032984;GO:…	GO:0003735;GO:0005198	GO:0005829;GO:0005912;GO:0005924;GO:0005925;GO:0015934;GO:0016020;GO:0022625;GO:0030054;GO:0030055;GO:0030529;GO:0031982;GO:0031988;GO:0032991;GO:0043226;GO:0043227;GO:0043230;GO:0044421;GO:0044422;GO:0044424;GO:0044444;GO:0044446;GO:0044464;GO:0065010;GO:0070062;GO:0070161	CTGGEVGATSALAPK	15	2	1	C[125.0477]TGGEVGATSALAPK	C[130.0791]TGGEVGATSALAPK	C	NaN	-1.83538	2.91925	NaN	NaN	0.665626	0.628552	0.779843	NaN	1.53879	3.19887	2.461	2.43329	1.92721	NaN	2.63101	0.702358	2.46229	NaN	NaN	NaN	2.62281	3.18338	1.96497	1.89333	2.4015	NaN	-0.112577	0.745901	2.32423	3.15684
+	+	0.0315897	2.37349	0.436952	P11277	Spectrin beta chain, erythrocytic	SPTB	1552	GO:0006778;GO:0006779;GO:0006807;GO:0006935;GO:0007009;GO:0007411;GO:0008064;GO:0008152;GO:0009058;GO:0009605;GO:0009987;GO:0010639;GO:0016043;GO:0016044;GO:0018130;GO:0030097;GO:0030832;GO:0030833;GO:0030834;GO:0030835;GO:0030837;GO:0031333;GO:0032271;GO:0032272;GO:0032502;GO:0032535;GO:0032956;GO:0032970;GO:0033013;GO:0033014;GO:0033043;GO:0034641;GO:0040011;GO:0042221;GO:0042330;GO:0043242;GO:…	GO:0003779;GO:0005198;GO:0005200;GO:0005488;GO:0005515;GO:0008092;GO:0030506;GO:0051015	GO:0005737;GO:0005829;GO:0005856;GO:0008091;GO:0009986;GO:0014731;GO:0015629;GO:0031224;GO:0031226;GO:0031235;GO:0032991;GO:0043226;GO:0043228;GO:0043229;GO:0043232;GO:0043234;GO:0044422;GO:0044424;GO:0044425;GO:0044430;GO:0044444;GO:0044446;GO:0044448;GO:0044459;GO:0044464	GQQLVEAAEIDCQDLEER	18	2	1	GQQLVEAAEIDC[125.0477]QDLEER	GQQLVEAAEIDC[130.0791]QDLEER	C	-0.0487609	-0.563602	-0.658216	0.54237	0.0867893	0.626499	0.423061	0.528871	1.11072	0.241964	0.53441	0.334182	NaN	NaN	0.256659	NaN	0.356442	NaN	0.961101	0.949233	NaN	1.22446	-0.0184872	0.35575	0.683758	NaN	0.728287	-0.288987	0.484342	1.33692	0.305896
+	+	0.00147059	3.8877	0.432526	P68871	Hemoglobin subunit beta	HBB	113	GO:0000302;GO:0003008;GO:0003013;GO:0003014;GO:0003018;GO:0006461;GO:0006810;GO:0006811;GO:0006820;GO:0006897;GO:0006898;GO:0006950;GO:0006979;GO:0007155;GO:0007596;GO:0007599;GO:0008152;GO:0008217;GO:0009056;GO:0009889;GO:0009891;GO:0009893;GO:0009987;GO:0010035;GO:0010324;GO:0010941;GO:0010942;GO:0015669;GO:0015671;GO:0015698;GO:0015701;GO:0015711;GO:0016043;GO:0016044;GO:0016192;GO:0016337;GO:…	GO:0005215;GO:0005344;GO:0005488;GO:0005506;GO:0005515;GO:0019825;GO:0020037;GO:0022892;GO:0030492;GO:0043167;GO:0043169;GO:0046872;GO:0046906;GO:0046914	GO:0005576;GO:0005829;GO:0005833;GO:0031838;GO:0031974;GO:0031982;GO:0031983;GO:0031988;GO:0032991;GO:0043226;GO:0043227;GO:0043230;GO:0043233;GO:0043234;GO:0044421;GO:0044422;GO:0044424;GO:0044433;GO:0044444;GO:0044445;GO:0044446;GO:0044464;GO:0060205;GO:0065010;GO:0070062;GO:0071682;GO:0072562	LHVDPENFRLLGNVLVCVLAHHFGK	25	3;4;5	1	LHVDPENFRLLGNVLVC[125.0477]VLAHHFGK	LHVDPENFRLLGNVLVC[130.0791]VLAHHFGK	C	0.793103	2.02648	0.897139	0.824913	1.28283	1.77862	1.00896	1.03859	0.989754	1.79829	1.31747	1.46983	-0.0698519	0.193242	1.42169	1.25328	1.72025	1.60779	1.38364	2.27811	0.918606	0.827918	1.70385	1.71463	1.23123	0.600161	1.5369	2.14872	1.76741	1.29367	1.64644
	+	0.170126	1.32396	0.430704	Q99961	Endophilin-A2	SH3GL1	147	GO:0006810;GO:0006897;GO:0007165;GO:0007417;GO:0009987;GO:0010324;GO:0016043;GO:0016044;GO:0016192;GO:0032502;GO:0048731;GO:0048856;GO:0050789;GO:0050794;GO:0050896;GO:0051234;GO:0051716;GO:0061024;GO:0065007;GO:0071840	GO:0005488;GO:0005515;GO:0008289;GO:0042802	GO:0002102;GO:0005737;GO:0010008;GO:0016020;GO:0030054;GO:0031090;GO:0031901;GO:0032991;GO:0042995;GO:0043226;GO:0043228;GO:0043229;GO:0043232;GO:0043234;GO:0044422;GO:0044424;GO:0044430;GO:0044440;GO:0044444;GO:0044446;GO:0044464	QNFIDPLQNLCEK	13	2	1	QNFIDPLQNLC[125.0477]EK	QNFIDPLQNLC[130.0791]EK	C	-0.0222041	NaN	NaN	-1.67806	0.0960918	NaN	0.219409	-0.726988	NaN	-1.75886	NaN	NaN	NaN	-0.442517	NaN	-0.153057	0.724374	NaN	NaN	NaN	NaN	-1.11163	NaN	-1.11381	NaN	-1.77066	NaN	-0.137711	NaN	NaN	NaN
	+	0.0661304	1.92769	0.421375	Q7Z4W1	L-xylulose reductase	DCXR	244	GO:0005975;GO:0005996;GO:0005997;GO:0006006;GO:0006066;GO:0006139;GO:0006461;GO:0006732;GO:0006733;GO:0006739;GO:0006753;GO:0006807;GO:0008152;GO:0009117;GO:0009987;GO:0016043;GO:0019318;GO:0019321;GO:0019362;GO:0022607;GO:0034641;GO:0042732;GO:0043933;GO:0044237;GO:0044238;GO:0044262;GO:0044281;GO:0046483;GO:0046496;GO:0051186;GO:0051259;GO:0051260;GO:0051262;GO:0051289;GO:0055086;GO:0055114;GO:…	GO:0003824;GO:0016491;GO:0016614;GO:0016616;GO:0016651;GO:0016655;GO:0050038	GO:0005634;GO:0005874;GO:0005881;GO:0005902;GO:0005903;GO:0016020;GO:0031982;GO:0031988;GO:0032991;GO:0042995;GO:0043226;GO:0043227;GO:0043229;GO:0043230;GO:0043231;GO:0043234;GO:0044421;GO:0044422;GO:0044424;GO:0044430;GO:0044444;GO:0044446;GO:0044464;GO:0065010;GO:0070062	SGMTTGSTLPVEGGFWAC	18	2	1	SGMTTGSTLPVEGGFWAC[125.0477]	SGMTTGSTLPVEGGFWAC[130.0791]	C	NaN	NaN	3.08716	NaN	NaN	2.87533	NaN	2.50655	NaN	NaN	3.9695	NaN	0.984714	1.39134	2.25011	1.42784	NaN	NaN	3.07482	NaN	NaN	2.90017	NaN	3.19317	3.82756	2.83144	NaN	NaN	3.73376	NaN	3.01971
+	+	0.0489959	2.10127	0.419395	Q96QK1	Vacuolar protein sorting-associated protein 35	VPS35	640	GO:0006810;GO:0006886;GO:0009987;GO:0015031;GO:0016192;GO:0016197;GO:0042147;GO:0045056;GO:0045184;GO:0046907;GO:0051234;GO:0051649	GO:0005215;GO:0008565;GO:0022892	GO:0005765;GO:0005768;GO:0005769;GO:0005770;GO:0005774;GO:0005829;GO:0016020;GO:0030904;GO:0031090;GO:0031982;GO:0031988;GO:0032991;GO:0043226;GO:0043227;GO:0043229;GO:0043230;GO:0043231;GO:0043234;GO:0044421;GO:0044422;GO:0044424;GO:0044425;GO:0044437;GO:0044444;GO:0044446;GO:0044464;GO:0065010;GO:0070062	CFSEENHEPLR	11	2	1	C[125.0477]FSEENHEPLR	C[130.0791]FSEENHEPLR	C	2.99858	NaN	1.76938	NaN	3.2455	3.02193	NaN	NaN	2.293	2.45497	2.37296	NaN	NaN	1.79147	NaN	2.16837	1.76506	3.87277	NaN	NaN	2.11963	2.20812	1.93386	2.73345	2.00057	1.75707	2.41302	1.72824	2.59284	4.33957	1.92692
+	+	0.000142857	5.1133	0.416223	P08133	Annexin A6	ANXA6	114	GO:0006461;GO:0006810;GO:0006811;GO:0006812;GO:0006816;GO:0006937;GO:0009987;GO:0016043;GO:0022607;GO:0030001;GO:0034220;GO:0043933;GO:0044057;GO:0050789;GO:0051234;GO:0051239;GO:0051259;GO:0051260;GO:0055085;GO:0065003;GO:0065007;GO:0070838;GO:0071822;GO:0071840;GO:0072511;GO:0090257	GO:0000166;GO:0005215;GO:0005216;GO:0005488;GO:0005496;GO:0005509;GO:0005515;GO:0005525;GO:0005543;GO:0005544;GO:0008289;GO:0015075;GO:0015267;GO:0015276;GO:0015485;GO:0017076;GO:0019001;GO:0022803;GO:0022834;GO:0022836;GO:0022838;GO:0022857;GO:0022891;GO:0022892;GO:0032553;GO:0032555;GO:0032561;GO:0032934;GO:0035639;GO:0042802;GO:0042803;GO:0043167;GO:0043169;GO:0046872;GO:0046983;GO:0048306	GO:0005765;GO:0005774;GO:0005912;GO:0005924;GO:0005925;GO:0010008;GO:0016020;GO:0016023;GO:0030054;GO:0030055;GO:0031090;GO:0031410;GO:0031902;GO:0031982;GO:0031988;GO:0042470;GO:0043226;GO:0043227;GO:0043229;GO:0043230;GO:0043231;GO:0044421;GO:0044422;GO:0044424;GO:0044437;GO:0044440;GO:0044444;GO:0044446;GO:0044464;GO:0048471;GO:0048770;GO:0065010;GO:0070062;GO:0070161	CLIEILASR	9	2	1	C[125.0477]LIEILASR	C[130.0791]LIEILASR	C	1.32004	0.650748	1.20572	0.144868	1.99084	0.692989	1.32837	0.172033	1.38563	1.52127	-0.0748838	-1.56722	-0.110533	-0.161278	-0.349548	-0.128439	0.361004	-0.239129	0.715416	-0.901201	0.459394	-0.154732	-0.610397	1.02605	0.499801	-0.1151	0.136465	0.289546	0.480297	0.292924	-0.0369812
+	+	0.000125	4.88816	0.407572	P28838	Cytosol aminopeptidase	LAP3	376	GO:0006508;GO:0008152;GO:0019538;GO:0043170;GO:0044238	GO:0003824;GO:0004177;GO:0005488;GO:0008233;GO:0008235;GO:0008237;GO:0008238;GO:0016787;GO:0030145;GO:0043167;GO:0043169;GO:0046872;GO:0046914;GO:0070011	GO:0005634;GO:0005654;GO:0005737;GO:0005739;GO:0005802;GO:0005912;GO:0005924;GO:0005925;GO:0030054;GO:0030055;GO:0031982;GO:0031988;GO:0043226;GO:0043227;GO:0043229;GO:0043230;GO:0043231;GO:0044421;GO:0044422;GO:0044424;GO:0044428;GO:0044431;GO:0044444;GO:0044446;GO:0044464;GO:0065010;GO:0070062;GO:0070161	LILADALCYAHTFNPK	16	2;3	1	LILADALC[125.0477]YAHTFNPK	LILADALC[130.0791]YAHTFNPK	C	0.851825	-1.27604	0.153819	0.702234	0.797677	0.309332	0.859107	0.811266	0.135557	0.603707	1.1586	0.466078	0.730784	0.792167	1.02738	0.493629	1.05237	0.109171	1.09954	-0.114202	NaN	0.650367	-0.108874	1.21496	0.975079	0.291117	0.404366	-0.0347648	1.28219	0.4317	0.925796
+	+	0.00580769	3.27402	0.401437	P11413	Glucose-6-phosphate 1-dehydrogenase	G6PD	232	GO:0001816;GO:0005975;GO:0005996;GO:0006006;GO:0006007;GO:0006014;GO:0006066;GO:0006082;GO:0006098;GO:0006139;GO:0006352;GO:0006367;GO:0006518;GO:0006520;GO:0006575;GO:0006629;GO:0006694;GO:0006695;GO:0006732;GO:0006733;GO:0006739;GO:0006740;GO:0006749;GO:0006753;GO:0006790;GO:0006807;GO:0006950;GO:0006979;GO:0008152;GO:0008202;GO:0008203;GO:0008610;GO:0009051;GO:0009056;GO:0009058;GO:0009117;GO:…	GO:0000166;GO:0003824;GO:0004345;GO:0005488;GO:0005515;GO:0005529;GO:0005536;GO:0016491;GO:0016614;GO:0016616;GO:0030246;GO:0042802;GO:0042803;GO:0046983;GO:0048029;GO:0048037;GO:0050661;GO:0050662	GO:0005634;GO:0005737;GO:0005813;GO:0005815;GO:0005829;GO:0009898;GO:0016020;GO:0031982;GO:0031988;GO:0043226;GO:0043227;GO:0043228;GO:0043229;GO:0043230;GO:0043231;GO:0043232;GO:0044421;GO:0044422;GO:0044424;GO:0044425;GO:0044430;GO:0044444;GO:0044446;GO:0044459;GO:0044464;GO:0065010;GO:0070062	DNIACVILTFK	11	2	1	DNIAC[125.0477]VILTFK	DNIAC[130.0791]VILTFK	C	NaN	NaN	0.5416	NaN	NaN	0.749274	NaN	0.0736026	NaN	-0.0539569	1.54105	0.257157	NaN	0.372672	NaN	0.760744	0.60235	0.345015	0.629389	-1.0585	NaN	NaN	0.330749	NaN	0.492234	0.439387	0.258294	0.360197	0.0428191	0.396968	0.3051
	+	0.103923	1.62761	0.395199	Q00610	Clathrin heavy chain 1	CLTC	778	GO:0000041;GO:0000280;GO:0001649;GO:0002376;GO:0002478;GO:0002495;GO:0002504;GO:0006810;GO:0006811;GO:0006812;GO:0006826;GO:0006886;GO:0006892;GO:0006897;GO:0006898;GO:0006996;GO:0007067;GO:0008152;GO:0009987;GO:0010324;GO:0015031;GO:0015682;GO:0016043;GO:0016044;GO:0016192;GO:0019882;GO:0019884;GO:0019886;GO:0022402;GO:0022403;GO:0030001;GO:0030154;GO:0031623;GO:0032502;GO:0033572;GO:0043112;GO:…	GO:0003676;GO:0003723;GO:0003725;GO:0005198;GO:0005488;GO:0005515;GO:0019899;GO:0019900;GO:0019901;GO:0030276;GO:0032051	GO:0000139;GO:0005737;GO:0005819;GO:0005829;GO:0005886;GO:0005912;GO:0005924;GO:0005925;GO:0012506;GO:0016020;GO:0016023;GO:0030054;GO:0030055;GO:0030117;GO:0030118;GO:0030120;GO:0030125;GO:0030130;GO:0030132;GO:0030135;GO:0030136;GO:0030659;GO:0030662;GO:0030665;GO:0030666;GO:0030669;GO:0031090;GO:0031410;GO:0031982;GO:0031988;GO:0032588;GO:0032991;GO:0042470;GO:0043226;GO:0043227;GO:0043228;GO:…	LTDQLPLIIVCDR	13	2	1	LTDQLPLIIVC[125.0477]DR	LTDQLPLIIVC[130.0791]DR	C	0.955216	NaN	1.12085	NaN	1.3702	0.613634	NaN	0.730203	NaN	NaN	NaN	NaN	1.52268	0.984584	NaN	1.35031	NaN	0.663157	NaN	-3.20096	NaN	0.633017	NaN	0.582626	NaN	1.3574	NaN	NaN	1.31811	NaN	NaN
+	+	0.0111278	2.93957	0.390901	P13639	Elongation factor 2	EEF2	728	GO:0002244;GO:0006412;GO:0006414;GO:0006417;GO:0006464;GO:0008152;GO:0009058;GO:0009059;GO:0009889;GO:0009891;GO:0009893;GO:0009987;GO:0010467;GO:0010468;GO:0010556;GO:0010557;GO:0010604;GO:0010608;GO:0017182;GO:0017183;GO:0018193;GO:0018202;GO:0019222;GO:0019538;GO:0030154;GO:0031323;GO:0031325;GO:0031326;GO:0031328;GO:0032268;GO:0032270;GO:0032502;GO:0034645;GO:0043170;GO:0043412;GO:0043687;GO:…	GO:0000166;GO:0003676;GO:0003723;GO:0003746;GO:0003824;GO:0003924;GO:0005488;GO:0005515;GO:0005525;GO:0008135;GO:0016462;GO:0016787;GO:0016817;GO:0016818;GO:0017076;GO:0017111;GO:0019001;GO:0019899;GO:0019900;GO:0019901;GO:0032553;GO:0032555;GO:0032561;GO:0035639	GO:0005634;GO:0005737;GO:0005829;GO:0005844;GO:0005886;GO:0016020;GO:0016234;GO:0016235;GO:0030529;GO:0031982;GO:0031988;GO:0032991;GO:0043226;GO:0043227;GO:0043229;GO:0043230;GO:0043231;GO:0044421;GO:0044424;GO:0044444;GO:0044464;GO:0065010;GO:0070062	CLYASVLTAQPR	12	2	1	C[125.0477]LYASVLTAQPR	C[130.0791]LYASVLTAQPR	C	2.37476	NaN	2.18329	NaN	1.93467	1.92096	2.43557	1.81197	NaN	2.29487	2.26089	1.90298	1.78244	1.92121	2.0996	1.95508	1.80599	1.89294	2.3852	-2.30429	NaN	2.77383	NaN	2.04566	2.22626	1.97351	1.66445	1.1931	1.8132	1.77963	NaN
	+	0.115106	1.57534	0.386118	P68366	Tubulin alpha-4A chain	TUBA4A	376	GO:0000086;GO:0000278;GO:0001775;GO:0002576;GO:0006457;GO:0006458;GO:0006461;GO:0006810;GO:0006887;GO:0006996;GO:0007017;GO:0007049;GO:0007596;GO:0007599;GO:0008152;GO:0009987;GO:0016043;GO:0016192;GO:0019538;GO:0022402;GO:0022607;GO:0030168;GO:0032501;GO:0032940;GO:0034621;GO:0034622;GO:0043170;GO:0043623;GO:0043933;GO:0044237;GO:0044238;GO:0044260;GO:0044267;GO:0046903;GO:0050817;GO:0050878;GO:…	GO:0000166;GO:0003824;GO:0003924;GO:0005198;GO:0005200;GO:0005488;GO:0005525;GO:0016462;GO:0016787;GO:0016817;GO:0016818;GO:0017076;GO:0017111;GO:0019001;GO:0032553;GO:0032555;GO:0032561;GO:0035639	GO:0005576;GO:0005829;GO:0005874;GO:0031982;GO:0031988;GO:0032991;GO:0043226;GO:0043227;GO:0043230;GO:0043234;GO:0044421;GO:0044422;GO:0044424;GO:0044430;GO:0044444;GO:0044446;GO:0044464;GO:0065010;GO:0070062	AVCMLSNTTAIAEAWAR	17	2;3	1	AVC[125.0477]MLSNTTAIAEAWAR	AVC[130.0791]MLSNTTAIAEAWAR	C	-2.28713	-1.06717	-2.1631	-1.24564	-1.21762	-1.84728	0.777249	-1.99634	-1.08361	-0.842603	-1.73018	-0.916539	0.0174502	-0.0363339	-1.39924	-1.55181	-0.974597	-2.07145	-2.19407	-1.21893	NaN	-1.24461	-1.56566	-0.427754	1.05093	-2.24752	-0.699606	-1.59687	-1.59385	-0.879208	-1.87989
+	+	0.0338894	2.33521	0.38258	P63010	AP-2 complex subunit beta	AP2B1	129	GO:0002376;GO:0002478;GO:0002495;GO:0002504;GO:0002682;GO:0002697;GO:0002831;GO:0006810;GO:0006886;GO:0006897;GO:0006898;GO:0006935;GO:0007154;GO:0007165;GO:0007166;GO:0007167;GO:0007169;GO:0007173;GO:0007267;GO:0007268;GO:0007411;GO:0009605;GO:0009966;GO:0009968;GO:0009987;GO:0010324;GO:0010646;GO:0010648;GO:0015031;GO:0016032;GO:0016043;GO:0016044;GO:0016192;GO:0019882;GO:0019884;GO:0019886;GO:…	GO:0005048;GO:0005215;GO:0005488;GO:0005515;GO:0008565;GO:0022892;GO:0030276;GO:0042277	GO:0005829;GO:0005886;GO:0012506;GO:0016020;GO:0030119;GO:0030122;GO:0030131;GO:0030659;GO:0030662;GO:0030665;GO:0030666;GO:0030669;GO:0031090;GO:0032991;GO:0043226;GO:0043227;GO:0043229;GO:0043231;GO:0043234;GO:0044422;GO:0044424;GO:0044425;GO:0044433;GO:0044444;GO:0044446;GO:0044459;GO:0044464	CLKDEDPYVR	10	2	1	C[125.0477]LKDEDPYVR	C[130.0791]LKDEDPYVR	C	1.1736	-1.51025	1.45113	NaN	1.60622	NaN	NaN	0.128113	0.884812	2.28101	0.71555	0.992083	1.14153	0.489726	1.59419	0.369852	0.950854	0.616539	0.882638	NaN	NaN	0.153099	1.16366	1.12685	1.15197	-0.0261487	0.918841	0.716759	1.10647	0.490516	0.683072
	+	0.0544496	2.03283	0.380777	P40855	Peroxisomal biogenesis factor 19	PEX19	229	GO:0006457;GO:0006605;GO:0006612;GO:0006625;GO:0006810;GO:0006886;GO:0006996;GO:0007031;GO:0008152;GO:0009987;GO:0010468;GO:0010608;GO:0015031;GO:0016043;GO:0016557;GO:0016559;GO:0017038;GO:0019222;GO:0019538;GO:0031647;GO:0043170;GO:0043574;GO:0044085;GO:0044091;GO:0044237;GO:0044238;GO:0044260;GO:0044267;GO:0045046;GO:0045184;GO:0046907;GO:0048285;GO:0050789;GO:0050821;GO:0051234;GO:0051649;GO:…	GO:0005488;GO:0005515;GO:0019899;GO:0047485;GO:0051117	GO:0005634;GO:0005654;GO:0005737;GO:0005777;GO:0005778;GO:0005829;GO:0016020;GO:0016021;GO:0031090;GO:0031224;GO:0031253;GO:0031526;GO:0031903;GO:0032991;GO:0042579;GO:0043226;GO:0043227;GO:0043229;GO:0043231;GO:0043234;GO:0044422;GO:0044424;GO:0044425;GO:0044428;GO:0044438;GO:0044439;GO:0044444;GO:0044446;GO:0044459;GO:0044463;GO:0044464	ICEQFEAETPTDSETTQK	18	2	1	IC[125.0477]EQFEAETPTDSETTQK	IC[130.0791]EQFEAETPTDSETTQK	C	1.18944	NaN	1.03343	0.291483	NaN	1.77047	-0.683366	0.846795	NaN	0.549128	0.909773	0.63853	0.238442	0.107842	NaN	1.22736	NaN	-0.0636173	NaN	NaN	0.884807	0.513483	0.50271	0.605155	1.57493	0.370334	NaN	0.0581295	NaN	NaN	NaN
	+	0.10987	1.59905	0.371474	P07737	Profilin-1	PFN1	128	GO:0001775;GO:0001843;GO:0002576;GO:0006140;GO:0006355;GO:0006357;GO:0006810;GO:0006887;GO:0006996;GO:0007010;GO:0007596;GO:0007599;GO:0008064;GO:0009889;GO:0009891;GO:0009893;GO:0009894;GO:0009987;GO:0010033;GO:0010468;GO:0010556;GO:0010557;GO:0010604;GO:0010628;GO:0010632;GO:0010634;GO:0010638;GO:0010639;GO:0016043;GO:0016192;GO:0019219;GO:0019222;GO:0030029;GO:0030036;GO:0030168;GO:0030334;GO:…	GO:0000166;GO:0000774;GO:0003779;GO:0003785;GO:0005488;GO:0005515;GO:0005543;GO:0005546;GO:0008092;GO:0008289;GO:0017076;GO:0030234;GO:0030554;GO:0035091;GO:0060589;GO:0060590;GO:0070064	GO:0005634;GO:0005737;GO:0005829;GO:0005856;GO:0005912;GO:0005924;GO:0005925;GO:0005938;GO:0016020;GO:0030054;GO:0030055;GO:0031982;GO:0031988;GO:0042995;GO:0043005;GO:0043226;GO:0043227;GO:0043228;GO:0043229;GO:0043230;GO:0043231;GO:0043232;GO:0044421;GO:0044424;GO:0044444;GO:0044464;GO:0045202;GO:0065010;GO:0070062;GO:0070161;GO:0072562	CYEMASHLR	9	2	1	C[125.0477]YEMASHLR	C[130.0791]YEMASHLR	C	5.80413	-2.10808	2.16146	2.70496	3.177	3.16488	4.12328	2.92	3.75236	2.66245	3.18362	2.84848	2.82397	5.23844	3.33906	2.83494	3.66368	3.0597	3.21383	0.442677	2.03822	3.0683	3.66668	3.25496	2.08285	5.22791	2.47461	1.95955	2.41868	3.57637	2.21455
+	+	0.013986	2.82025	0.369802	P14866	Heterogeneous nuclear ribonucleoprotein L	HNRNPL	472	GO:0000375;GO:0000377;GO:0000398;GO:0006139;GO:0006396;GO:0006397;GO:0006807;GO:0008152;GO:0008380;GO:0009987;GO:0010467;GO:0016070;GO:0016071;GO:0034641;GO:0043170;GO:0044237;GO:0044238;GO:0044260;GO:0090304	GO:0000166;GO:0000975;GO:0001067;GO:0003676;GO:0003677;GO:0003723;GO:0005488;GO:0044212	GO:0005634;GO:0005654;GO:0005737;GO:0016020;GO:0030529;GO:0031982;GO:0031988;GO:0032991;GO:0043226;GO:0043227;GO:0043229;GO:0043230;GO:0043231;GO:0044421;GO:0044422;GO:0044424;GO:0044428;GO:0044446;GO:0044464;GO:0065010;GO:0070062	QPAIMPGQSYGLEDGSCSYK	20	2	1	QPAIMPGQSYGLEDGSC[125.0477]SYK	QPAIMPGQSYGLEDGSC[130.0791]SYK	C	NaN	NaN	NaN	NaN	NaN	NaN	NaN	0.308272	NaN	-0.0710988	NaN	0.52152	0.427137	0.427565	0.754599	0.334212	0.433337	0.509109	0.455982	NaN	NaN	NaN	0.291933	0.870668	0.463404	0.348293	NaN	0.330045	0.293807	-0.234347	0.341345
	+	0.104565	1.6223	0.369378	P47755	F-actin-capping protein subunit alpha-2	CAPZA2	157	GO:0002376;GO:0006461;GO:0006928;GO:0006950;GO:0006952;GO:0006955;GO:0007596;GO:0007599;GO:0008064;GO:0009987;GO:0010639;GO:0016043;GO:0022607;GO:0030832;GO:0030833;GO:0030834;GO:0030835;GO:0030837;GO:0031333;GO:0032271;GO:0032272;GO:0032501;GO:0032535;GO:0032956;GO:0032970;GO:0033043;GO:0043242;GO:0043244;GO:0043254;GO:0043933;GO:0044087;GO:0045087;GO:0048519;GO:0048523;GO:0050789;GO:0050794;GO:…		GO:0005576;GO:0005829;GO:0005856;GO:0008290;GO:0015629;GO:0016020;GO:0030863;GO:0031982;GO:0031988;GO:0032991;GO:0043226;GO:0043227;GO:0043228;GO:0043229;GO:0043230;GO:0043232;GO:0043234;GO:0044421;GO:0044422;GO:0044424;GO:0044430;GO:0044444;GO:0044446;GO:0044448;GO:0044464;GO:0065010;GO:0070062	IDGQQTIIACIESHQFQAK	19	3	1	IDGQQTIIAC[125.0477]IESHQFQAK	IDGQQTIIAC[130.0791]IESHQFQAK	C	-0.0848694	NaN	1.13926	NaN	2.28067	1.47413	NaN	2.15141	NaN	NaN	1.55484	1.1204	0.307423	0.295402	1.65003	-0.0892992	0.78489	0.380455	1.67915	NaN	NaN	NaN	0.901528	1.64928	1.88154	0.405757	NaN	0.647419	0.79981	NaN	NaN
+	+	0.0193631	2.65714	0.367289	P50914	60S ribosomal protein L14	RPL14	54	GO:0000184;GO:0000956;GO:0006139;GO:0006364;GO:0006396;GO:0006401;GO:0006402;GO:0006412;GO:0006413;GO:0006414;GO:0006415;GO:0006605;GO:0006612;GO:0006613;GO:0006614;GO:0006807;GO:0006810;GO:0006886;GO:0008152;GO:0009056;GO:0009057;GO:0009058;GO:0009059;GO:0009987;GO:0010467;GO:0015031;GO:0016032;GO:0016043;GO:0016070;GO:0016071;GO:0016072;GO:0019058;GO:0019083;GO:0019538;GO:0022411;GO:0022414;GO:…	GO:0003676;GO:0003723;GO:0003735;GO:0005198;GO:0005488	GO:0005737;GO:0005829;GO:0015934;GO:0016020;GO:0022625;GO:0030529;GO:0031982;GO:0031988;GO:0032991;GO:0043226;GO:0043227;GO:0043230;GO:0044421;GO:0044422;GO:0044424;GO:0044444;GO:0044446;GO:0044464;GO:0065010;GO:0070062	CMQLTDFILK	10	1;2	1	C[125.0477]MQLTDFILK	C[130.0791]MQLTDFILK	C	2.95961	-1.45819	2.23081	NaN	2.51394	2.37242	NaN	2.01772	NaN	1.87979	NaN	NaN	2.22616	2.59799	2.68717	1.79536	2.40691	2.64895	2.15929	-0.792526	NaN	2.34766	1.72018	2.96255	2.61136	1.84083	1.82597	1.60953	1.84915	2.13165	2.23156
+	+	0.0215714	2.58679	0.367019	P62140	Serine/threonine-protein phosphatase PP1-beta catalytic subunit	PPP1CB	244	GO:0000086;GO:0000278;GO:0005975;GO:0005976;GO:0005977;GO:0005979;GO:0005981;GO:0006073;GO:0006091;GO:0006109;GO:0006112;GO:0006464;GO:0006470;GO:0006629;GO:0006638;GO:0006639;GO:0006641;GO:0006662;GO:0006793;GO:0006796;GO:0007049;GO:0007165;GO:0007166;GO:0007167;GO:0007178;GO:0007179;GO:0007264;GO:0007623;GO:0008152;GO:0009056;GO:0009314;GO:0009416;GO:0009605;GO:0009628;GO:0009648;GO:0009649;GO:…	GO:0003824;GO:0004721;GO:0004722;GO:0005488;GO:0005515;GO:0016787;GO:0016788;GO:0016791;GO:0017018;GO:0019899;GO:0019900;GO:0019901;GO:0042578;GO:0043167;GO:0043169;GO:0046872;GO:0050115	GO:0000164;GO:0005634;GO:0005654;GO:0005730;GO:0005829;GO:0005912;GO:0005924;GO:0005925;GO:0008287;GO:0030054;GO:0030055;GO:0031982;GO:0031988;GO:0032991;GO:0034708;GO:0035097;GO:0042587;GO:0043226;GO:0043227;GO:0043228;GO:0043229;GO:0043230;GO:0043231;GO:0043232;GO:0043234;GO:0044421;GO:0044422;GO:0044424;GO:0044428;GO:0044444;GO:0044446;GO:0044451;GO:0044464;GO:0065010;GO:0070062;GO:0070161;GO:…	FLNRHDLDLICR	12	2	1	FLNRHDLDLIC[125.0477]R	FLNRHDLDLIC[130.0791]R	C	1.57812	NaN	0.642213	NaN	0.754273	0.596292	0.861281	2.23934	1.44368	NaN	1.33892	NaN	1.16867	0.362209	1.3218	0.517422	0.617529	0.318395	1.24666	NaN	1.48512	0.665019	0.995212	0.93685	1.11032	1.17448	1.00265	NaN	0.742426	NaN	0.247252
+	+	0.0372808	2.28673	0.366811	P51991	Heterogeneous nuclear ribonucleoprotein A3	HNRNPA3	64	GO:0000375;GO:0000377;GO:0000398;GO:0006139;GO:0006396;GO:0006397;GO:0006807;GO:0008152;GO:0008380;GO:0009987;GO:0010467;GO:0016070;GO:0016071;GO:0034641;GO:0043170;GO:0044237;GO:0044238;GO:0044260;GO:0090304	GO:0000166;GO:0003676;GO:0003723;GO:0005488	GO:0005634;GO:0005654;GO:0005681;GO:0030529;GO:0032991;GO:0043226;GO:0043227;GO:0043229;GO:0043231;GO:0044422;GO:0044424;GO:0044428;GO:0044446;GO:0044464;GO:0071013	WGTLTDCVVMRDPQTK	16	2;3	1	WGTLTDC[125.0477]VVMRDPQTK	WGTLTDC[130.0791]VVMRDPQTK	C	NaN	NaN	0.817828	NaN	NaN	-0.0590095	NaN	0.121312	NaN	NaN	1.89346	NaN	0.598345	0.4405	-0.164783	0.657965	0.34047	0.516637	0.342549	NaN	NaN	NaN	0.329849	0.580177	-0.00715543	0.141772	NaN	0.106046	0.376877	0.869017	0.239587
	+	0.0510361	2.07221	0.357316	P01871	Immunoglobulin heavy constant mu	IGHM	303	GO:0002250;GO:0002376;GO:0006950;GO:0006952;GO:0006955;GO:0006959;GO:0009607;GO:0009617;GO:0019730;GO:0019731;GO:0042742;GO:0045087;GO:0050829;GO:0050896;GO:0051704;GO:0051707	GO:0003823;GO:0005488	GO:0005615;GO:0005886;GO:0009986;GO:0016020;GO:0016021;GO:0019814;GO:0031224;GO:0031982;GO:0031988;GO:0032991;GO:0042571;GO:0043226;GO:0043227;GO:0043230;GO:0043234;GO:0044421;GO:0044425;GO:0044464;GO:0065010;GO:0070062;GO:0071753;GO:0071754;GO:0071756;GO:0071757;GO:0072562	FTCTVTHTDLPSPLK	15	2;3	1	FTC[125.0477]TVTHTDLPSPLK	FTC[130.0791]TVTHTDLPSPLK	C	NaN	-2.86341	-1.56621	NaN	-2.49123	-2.83204	-2.32992	-1.97307	NaN	NaN	-2.91592	NaN	-2.7068	NaN	-2.13891	-2.36782	-2.59368	NaN	-1.91971	-1.30737	-1.14514	NaN	-2.3419	-2.18368	-2.48271	NaN	-2.73883	-1.02717	-2.69462	-1.21889	-2.00415
	+	0.133519	1.47569	0.355857	Q9BUJ2	Heterogeneous nuclear ribonucleoprotein U-like protein 1	HNRNPUL1	487	GO:0000375;GO:0000377;GO:0000398;GO:0006139;GO:0006351;GO:0006355;GO:0006396;GO:0006397;GO:0006807;GO:0008152;GO:0008380;GO:0009058;GO:0009059;GO:0009607;GO:0009615;GO:0009889;GO:0009987;GO:0010467;GO:0010468;GO:0010556;GO:0016070;GO:0016071;GO:0019219;GO:0019222;GO:0031323;GO:0031326;GO:0032774;GO:0034641;GO:0034645;GO:0043170;GO:0044237;GO:0044238;GO:0044249;GO:0044260;GO:0050789;GO:0050794;GO:…	GO:0003676;GO:0003723;GO:0005488;GO:0005515;GO:0019899	GO:0005634;GO:0005654;GO:0030529;GO:0032991;GO:0043226;GO:0043227;GO:0043229;GO:0043231;GO:0044422;GO:0044424;GO:0044428;GO:0044446;GO:0044464	WDVLIQQATQCLNR	14	2	1	WDVLIQQATQC[125.0477]LNR	WDVLIQQATQC[130.0791]LNR	C	NaN	NaN	NaN	-1.81053	NaN	-0.853156	NaN	-0.984904	NaN	-0.277169	NaN	NaN	NaN	-0.4289	NaN	0.0393995	0.476836	0.809109	NaN	NaN	NaN	-1.70102	NaN	-0.216518	-0.20394	-0.183888	NaN	-0.303081	0.72881	NaN	NaN
+	+	0.0305078	2.3919	0.35394	P63244	Receptor of activated protein C kinase 1	RACK1	240	GO:0001558;GO:0001649;GO:0001678;GO:0001932;GO:0001933;GO:0001934;GO:0003254;GO:0006140;GO:0006417;GO:0006469;GO:0006919;GO:0007049;GO:0007369;GO:0009653;GO:0009743;GO:0009746;GO:0009749;GO:0009889;GO:0009890;GO:0009892;GO:0009893;GO:0009894;GO:0009896;GO:0009966;GO:0009968;GO:0009987;GO:0010033;GO:0010468;GO:0010470;GO:0010556;GO:0010558;GO:0010562;GO:0010563;GO:0010604;GO:0010605;GO:0010608;GO:…	GO:0004857;GO:0004860;GO:0005080;GO:0005102;GO:0005198;GO:0005488;GO:0005515;GO:0008047;GO:0008200;GO:0008656;GO:0016247;GO:0016248;GO:0016504;GO:0016505;GO:0019207;GO:0019210;GO:0019887;GO:0019899;GO:0019900;GO:0019901;GO:0019902;GO:0019903;GO:0019904;GO:0030234;GO:0030292;GO:0030971;GO:0032947;GO:0035591;GO:0042169;GO:0042802;GO:0042803;GO:0043028;GO:0046983;GO:0060090;GO:0061134	GO:0001891;GO:0005634;GO:0005737;GO:0005739;GO:0005829;GO:0005856;GO:0015935;GO:0030425;GO:0030496;GO:0030529;GO:0031982;GO:0031988;GO:0032991;GO:0042995;GO:0043005;GO:0043025;GO:0043204;GO:0043226;GO:0043227;GO:0043228;GO:0043229;GO:0043230;GO:0043231;GO:0043232;GO:0044297;GO:0044421;GO:0044422;GO:0044424;GO:0044425;GO:0044444;GO:0044446;GO:0044459;GO:0044464;GO:0048471;GO:0065010;GO:0070062	DGQAMLWDLNEGKHLYTLDGGDIINALCFSPNR	33	3;4	1	DGQAMLWDLNEGKHLYTLDGGDIINALC[125.0477]FSPNR	DGQAMLWDLNEGKHLYTLDGGDIINALC[130.0791]FSPNR	C	0.307935	NaN	1.7688	NaN	NaN	1.59697	1.06036	0.985678	NaN	1.18368	NaN	1.27475	0.368236	0.457169	NaN	0.499619	0.680293	0.618457	NaN	NaN	NaN	NaN	1.01184	1.17588	1.13101	0.515457	NaN	0.63221	1.41223	0.66632	0.79811
+	+	0	6.51461	0.353002	P31150	Rab GDP dissociation inhibitor alpha	GDI1	282	GO:0006810;GO:0007165;GO:0007264;GO:0007265;GO:0009966;GO:0009987;GO:0010035;GO:0010038;GO:0010721;GO:0010769;GO:0010975;GO:0015031;GO:0022603;GO:0022604;GO:0023051;GO:0031344;GO:0031345;GO:0032386;GO:0032387;GO:0032482;GO:0032879;GO:0032880;GO:0033157;GO:0035556;GO:0042221;GO:0045184;GO:0045595;GO:0045596;GO:0045664;GO:0048519;GO:0048523;GO:0048583;GO:0050767;GO:0050768;GO:0050770;GO:0050771;GO:…	GO:0005083;GO:0005092;GO:0005093;GO:0005096;GO:0008047;GO:0030234;GO:0030695;GO:0060589	GO:0005737;GO:0005794;GO:0005829;GO:0030496;GO:0032991;GO:0042995;GO:0043005;GO:0043226;GO:0043227;GO:0043229;GO:0043231;GO:0043234;GO:0044424;GO:0044444;GO:0044464	QLICDPSYIPDR	12	2	1	QLIC[125.0477]DPSYIPDR	QLIC[130.0791]DPSYIPDR	C	0.44164	NaN	0.298796	NaN	-0.300286	0.14167	0.315202	-0.895767	NaN	-0.738185	0.193604	-0.278343	-0.491102	-0.690532	-0.457635	-0.0436558	-0.16209	-0.29904	-0.371061	NaN	NaN	0.157266	-0.158583	-0.467253	0.151771	-1.52934	-0.191265	0.0580566	-0.0760325	0.0960659	NaN
+	+	0.0210909	2.60647	0.352576	P17858	ATP-dependent 6-phosphofructokinase, liver type	PFKL	170	GO:0002791;GO:0002792;GO:0005975;GO:0005996;GO:0006000;GO:0006002;GO:0006006;GO:0006007;GO:0006066;GO:0006091;GO:0006096;GO:0006461;GO:0006793;GO:0006796;GO:0008152;GO:0009056;GO:0009743;GO:0009746;GO:0009749;GO:0009987;GO:0010033;GO:0010646;GO:0016043;GO:0016052;GO:0016310;GO:0019318;GO:0019320;GO:0022607;GO:0023051;GO:0030388;GO:0032879;GO:0034284;GO:0042221;GO:0043933;GO:0044237;GO:0044238;GO:…	GO:0000166;GO:0003824;GO:0003872;GO:0005488;GO:0005515;GO:0005524;GO:0005529;GO:0008443;GO:0016301;GO:0016740;GO:0016772;GO:0016773;GO:0017076;GO:0019200;GO:0019899;GO:0019900;GO:0030246;GO:0030554;GO:0032553;GO:0032555;GO:0032559;GO:0035639;GO:0042802;GO:0043167;GO:0043169;GO:0046872;GO:0048029;GO:0070061;GO:0070095	GO:0005829;GO:0005945;GO:0016020;GO:0031982;GO:0031988;GO:0032991;GO:0043226;GO:0043227;GO:0043230;GO:0043234;GO:0044421;GO:0044424;GO:0044444;GO:0044445;GO:0044464;GO:0065010;GO:0070062	TYSHLNIAGLVGSIDNDFCGTDMTIGTDSALHR	33	3;4	1	TYSHLNIAGLVGSIDNDFC[125.0477]GTDMTIGTDSALHR	TYSHLNIAGLVGSIDNDFC[130.0791]GTDMTIGTDSALHR	C	NaN	NaN	NaN	NaN	NaN	NaN	0.820159	NaN	NaN	NaN	1.27394	1.54677	1.05321	0.95345	NaN	0.903742	0.736252	1.2091	1.35415	NaN	NaN	NaN	NaN	NaN	NaN	1.34839	NaN	0.573113	NaN	0.904989	NaN
+	+	0.00135484	3.96681	0.349643	P49458	Signal recognition particle 9 kDa protein	SRP9	48	GO:0006412;GO:0006417;GO:0006448;GO:0006605;GO:0006612;GO:0006613;GO:0006614;GO:0006810;GO:0006886;GO:0008152;GO:0009058;GO:0009059;GO:0009889;GO:0009890;GO:0009892;GO:0009987;GO:0010467;GO:0010468;GO:0010556;GO:0010558;GO:0010605;GO:0010608;GO:0015031;GO:0017148;GO:0019222;GO:0019538;GO:0031323;GO:0031324;GO:0031326;GO:0031327;GO:0032268;GO:0032269;GO:0034645;GO:0043170;GO:0044237;GO:0044238;GO:…	GO:0003676;GO:0003723;GO:0005047;GO:0005488;GO:0008312;GO:0043021	GO:0005785;GO:0005786;GO:0005829;GO:0030529;GO:0031982;GO:0031988;GO:0032991;GO:0043226;GO:0043227;GO:0043230;GO:0043234;GO:0043235;GO:0044421;GO:0044422;GO:0044424;GO:0044425;GO:0044432;GO:0044444;GO:0044446;GO:0044464;GO:0048500;GO:0065010;GO:0070062	VTDDLVCLVYK	11	2	1	VTDDLVC[125.0477]LVYK	VTDDLVC[130.0791]LVYK	C	2.00257	NaN	NaN	0.883802	NaN	NaN	NaN	NaN	NaN	NaN	NaN	NaN	1.82028	NaN	NaN	1.93174	NaN	1.59124	NaN	NaN	NaN	0.921765	NaN	1.83031	NaN	0.609161	NaN	0.591885	1.61069	NaN	2.25223
+	+	0.0131511	2.85933	0.348165	Q16531	DNA damage-binding protein 1	DDB1	128	GO:0000718;GO:0006139;GO:0006259;GO:0006281;GO:0006289;GO:0006301;GO:0006308;GO:0006325;GO:0006464;GO:0006508;GO:0006511;GO:0006513;GO:0006807;GO:0006950;GO:0006974;GO:0006996;GO:0007165;GO:0007166;GO:0008152;GO:0009056;GO:0009057;GO:0009058;GO:0009059;GO:0009987;GO:0010390;GO:0010498;GO:0010941;GO:0016032;GO:0016043;GO:0016055;GO:0016567;GO:0016568;GO:0016569;GO:0016570;GO:0016574;GO:0019048;GO:…	GO:0003676;GO:0003677;GO:0003684;GO:0005488	GO:0000151;GO:0005615;GO:0005634;GO:0005654;GO:0005737;GO:0031461;GO:0031464;GO:0031465;GO:0031982;GO:0031988;GO:0032991;GO:0043226;GO:0043227;GO:0043229;GO:0043230;GO:0043231;GO:0043234;GO:0044421;GO:0044422;GO:0044424;GO:0044428;GO:0044446;GO:0044464;GO:0065010;GO:0070062;GO:0080008	IGRPSETGIIGIIDPECR	18	3	1	IGRPSETGIIGIIDPEC[125.0477]R	IGRPSETGIIGIIDPEC[130.0791]R	C	NaN	NaN	3.49823	NaN	NaN	2.95375	NaN	2.48456	NaN	NaN	NaN	2.61771	2.29567	1.85445	2.92983	2.03332	2.11991	NaN	3.43361	NaN	NaN	NaN	NaN	2.41552	4.14508	1.68618	NaN	NaN	2.58317	NaN	2.61789
+	+	0.022046	2.55713	0.343429	P28482	Mitogen-activated protein kinase 1	MAPK1	12	GO:0000165;GO:0000186;GO:0000187;GO:0000189;GO:0001568;GO:0001775;GO:0001932;GO:0001934;GO:0002218;GO:0002221;GO:0002224;GO:0002237;GO:0002253;GO:0002376;GO:0002429;GO:0002682;GO:0002684;GO:0002755;GO:0002756;GO:0002757;GO:0002758;GO:0002764;GO:0002768;GO:0003008;GO:0006139;GO:0006206;GO:0006351;GO:0006355;GO:0006417;GO:0006464;GO:0006468;GO:0006605;GO:0006606;GO:0006725;GO:0006793;GO:0006796;GO:…	GO:0000166;GO:0003676;GO:0003677;GO:0003824;GO:0004672;GO:0004674;GO:0004702;GO:0004707;GO:0004871;GO:0005057;GO:0005488;GO:0005515;GO:0005524;GO:0008353;GO:0016301;GO:0016740;GO:0016772;GO:0016773;GO:0017076;GO:0019899;GO:0019902;GO:0030554;GO:0032553;GO:0032555;GO:0032559;GO:0035639;GO:0060089	GO:0005634;GO:0005654;GO:0005737;GO:0005739;GO:0005768;GO:0005769;GO:0005770;GO:0005794;GO:0005815;GO:0005819;GO:0005829;GO:0005856;GO:0005901;GO:0005912;GO:0005924;GO:0005925;GO:0015630;GO:0030054;GO:0030055;GO:0030424;GO:0031143;GO:0031982;GO:0031988;GO:0032838;GO:0032839;GO:0032991;GO:0042995;GO:0043005;GO:0043204;GO:0043226;GO:0043227;GO:0043228;GO:0043229;GO:0043230;GO:0043231;GO:0043232;GO:…	DLKPSNLLINTTCDLK	16	2;3	1	DLKPSNLLINTTC[125.0477]DLK	DLKPSNLLINTTC[130.0791]DLK	C	-0.0822852	NaN	0.971453	NaN	NaN	0.0863682	0.893278	-0.142011	NaN	NaN	0.263977	0.394429	0.046362	0.578818	0.868094	-0.130715	0.936053	0.765756	-0.435549	NaN	NaN	NaN	0.592017	0.311269	NaN	0.306011	NaN	0.946153	0.620002	-1.60649	0.378765
	+	0.0768	1.83965	0.343327	Q01082	Spectrin beta chain, non-erythrocytic 1	SPTBN1	1284	GO:0000281;GO:0000910;GO:0006464;GO:0006468;GO:0006605;GO:0006606;GO:0006793;GO:0006796;GO:0006810;GO:0006886;GO:0006892;GO:0006893;GO:0006913;GO:0006935;GO:0007009;GO:0007182;GO:0007184;GO:0007411;GO:0008064;GO:0008152;GO:0009605;GO:0009987;GO:0010639;GO:0015031;GO:0016043;GO:0016044;GO:0016192;GO:0016310;GO:0017038;GO:0019538;GO:0022402;GO:0022607;GO:0030832;GO:0030833;GO:0030834;GO:0030835;GO:…	GO:0003779;GO:0005198;GO:0005200;GO:0005488;GO:0005515;GO:0005543;GO:0008092;GO:0008289;GO:0019899;GO:0030506;GO:0051020	GO:0005730;GO:0005737;GO:0005829;GO:0005856;GO:0008091;GO:0014731;GO:0030673;GO:0031253;GO:0031256;GO:0031430;GO:0031982;GO:0031988;GO:0032437;GO:0032589;GO:0032991;GO:0033267;GO:0043226;GO:0043227;GO:0043228;GO:0043229;GO:0043230;GO:0043232;GO:0043234;GO:0044421;GO:0044422;GO:0044424;GO:0044425;GO:0044428;GO:0044430;GO:0044444;GO:0044446;GO:0044448;GO:0044449;GO:0044459;GO:0044463;GO:0044464;GO:…	FLQDCQELSLWINEK	15	2	1	FLQDC[125.0477]QELSLWINEK	FLQDC[130.0791]QELSLWINEK	C	0.706668	NaN	0.816783	1.34214	1.35801	NaN	0.877105	NaN	0.318639	NaN	0.851443	NaN	-1.85857	-2.98674	0.861399	NaN	0.65173	0.146599	0.81629	NaN	NaN	NaN	0.605852	NaN	0.13696	-0.971733	0.581505	NaN	0.561964	NaN	0.429971
	+	0.0760544	1.84598	0.342514	Q9Y696	Chloride intracellular channel protein 4	CLIC4	234	GO:0000902;GO:0000904;GO:0001525;GO:0001763;GO:0001886;GO:0003382;GO:0006810;GO:0006811;GO:0006820;GO:0006821;GO:0006873;GO:0006885;GO:0006915;GO:0007035;GO:0007163;GO:0008219;GO:0009566;GO:0009653;GO:0009913;GO:0009987;GO:0010035;GO:0010038;GO:0012501;GO:0015698;GO:0016043;GO:0016265;GO:0019725;GO:0022414;GO:0030003;GO:0030004;GO:0030154;GO:0030216;GO:0030334;GO:0030336;GO:0030641;GO:0030855;GO:…	GO:0005215;GO:0005216;GO:0005244;GO:0005253;GO:0005254;GO:0008509;GO:0015075;GO:0015267;GO:0022803;GO:0022832;GO:0022836;GO:0022838;GO:0022857;GO:0022891;GO:0022892	GO:0005622;GO:0005737;GO:0005739;GO:0005813;GO:0005815;GO:0005829;GO:0005856;GO:0005886;GO:0005902;GO:0005911;GO:0009986;GO:0012506;GO:0015629;GO:0016020;GO:0016363;GO:0030054;GO:0030496;GO:0030659;GO:0031090;GO:0031982;GO:0031988;GO:0032991;GO:0034702;GO:0034707;GO:0042995;GO:0043226;GO:0043227;GO:0043228;GO:0043229;GO:0043230;GO:0043231;GO:0043232;GO:0043234;GO:0044421;GO:0044422;GO:0044424;GO:…	DEFTNTCPSDKEVEIAYSDVAK	22	3	1	DEFTNTC[125.0477]PSDKEVEIAYSDVAK	DEFTNTC[130.0791]PSDKEVEIAYSDVAK	C	0.44921	NaN	0.728193	0.68984	NaN	0.989873	1.12831	0.162122	NaN	0.202581	0.409516	0.323599	NaN	NaN	1.24282	NaN	NaN	0.54965	0.692716	NaN	NaN	0.773694	NaN	NaN	0.208414	-0.102187	NaN	NaN	0.785389	NaN	NaN
	+	0.0992632	1.67356	0.340215	Q9H4A4	Aminopeptidase B	RNPEP	181	GO:0006082;GO:0006508;GO:0006629;GO:0006631;GO:0006633;GO:0006636;GO:0006690;GO:0006691;GO:0008152;GO:0008610;GO:0009058;GO:0009987;GO:0016053;GO:0019370;GO:0019538;GO:0019752;GO:0032787;GO:0033559;GO:0042180;GO:0043170;GO:0043436;GO:0043449;GO:0043450;GO:0044237;GO:0044238;GO:0044249;GO:0044255;GO:0044281;GO:0044283;GO:0046394;GO:0046456	GO:0003824;GO:0004177;GO:0004301;GO:0005488;GO:0008233;GO:0008235;GO:0008237;GO:0008238;GO:0008270;GO:0016787;GO:0016801;GO:0016803;GO:0043167;GO:0043169;GO:0046872;GO:0046914;GO:0070011	GO:0005576;GO:0005615;GO:0005886;GO:0016020;GO:0031982;GO:0031988;GO:0043226;GO:0043227;GO:0043230;GO:0044421;GO:0044464;GO:0065010;GO:0070062	AFFPCFDTPAVK	12	2	1	AFFPC[125.0477]FDTPAVK	AFFPC[130.0791]FDTPAVK	C	1.09703	NaN	0.211221	NaN	NaN	NaN	NaN	NaN	NaN	NaN	NaN	0.513229	-0.53146	-0.0231244	1.17618	NaN	0.184506	0.368825	0.046341	-1.44957	NaN	NaN	NaN	0.183013	0.795469	0.112206	NaN	-0.198488	-0.033159	NaN	0.169301
+	+	0.00833333	3.08688	0.334918	P14618	Pyruvate kinase PKM	PKM	326	GO:0005975;GO:0005996;GO:0006006;GO:0006066;GO:0008152;GO:0008219;GO:0009987;GO:0012501;GO:0016265;GO:0019318;GO:0044237;GO:0044238;GO:0044262;GO:0044281	GO:0000166;GO:0000287;GO:0003823;GO:0003824;GO:0004743;GO:0005488;GO:0005524;GO:0016301;GO:0016740;GO:0016772;GO:0016773;GO:0017076;GO:0023023;GO:0023026;GO:0030554;GO:0030955;GO:0031420;GO:0032553;GO:0032555;GO:0032559;GO:0035639;GO:0043167;GO:0043169;GO:0046872	GO:0005634;GO:0005737;GO:0005739;GO:0005829;GO:0005886;GO:0005929;GO:0016020;GO:0031012;GO:0031982;GO:0031988;GO:0042995;GO:0043226;GO:0043227;GO:0043229;GO:0043230;GO:0043231;GO:0044421;GO:0044424;GO:0044444;GO:0044464;GO:0065010;GO:0070062	AGKPVICATQMLESMIK	17	2;3	1	AGKPVIC[125.0477]ATQMLESMIK	AGKPVIC[130.0791]ATQMLESMIK	C	-0.684487	-2.63222	-0.56092	-0.184351	-0.733986	-0.393418	-0.383796	-0.652272	-0.302134	-0.214828	-0.626828	-0.527834	-0.558336	-1.26841	-0.104934	-0.614271	-0.487452	-1.87948	-0.350214	-1.67684	-0.335906	-0.498964	-0.604915	-0.268146	-0.653088	-1.67522	-0.374094	-0.784049	-0.995534	-0.613449	-0.834736
	+	0.15673	1.37213	0.332198	O95373	Importin-7	IPO7	736	GO:0002376;GO:0006605;GO:0006606;GO:0006810;GO:0006886;GO:0006913;GO:0006950;GO:0006952;GO:0006955;GO:0007165;GO:0009987;GO:0015031;GO:0016032;GO:0017038;GO:0019222;GO:0045087;GO:0045184;GO:0046907;GO:0050789;GO:0050790;GO:0050794;GO:0050896;GO:0051169;GO:0051170;GO:0051234;GO:0051649;GO:0051716;GO:0065007;GO:0065009	GO:0005215;GO:0005488;GO:0005515;GO:0008536;GO:0017016;GO:0019899;GO:0030234;GO:0030695;GO:0031267;GO:0051020;GO:0060589	GO:0005643;GO:0005654;GO:0005737;GO:0016020;GO:0032991;GO:0043234;GO:0044422;GO:0044424;GO:0044425;GO:0044428;GO:0044446;GO:0044464;GO:0046930	VLTGVAGEDAECHAAK	16	2	1	VLTGVAGEDAEC[125.0477]HAAK	VLTGVAGEDAEC[130.0791]HAAK	C	1.70971	NaN	NaN	NaN	NaN	NaN	NaN	1.24733	NaN	1.59183	NaN	1.64213	1.566	1.1111	NaN	0.840979	NaN	0.79911	NaN	-1.50122	2.65987	NaN	NaN	0.963137	1.29677	0.63779	NaN	0.758889	1.2992	NaN	NaN
+	+	0.0409585	2.21565	0.330229	P55735	Protein SEC13 homolog	SEC13	245	GO:0000278;GO:0002376;GO:0002474;GO:0002478;GO:0002495;GO:0002504;GO:0005975;GO:0006464;GO:0006486;GO:0006487;GO:0006810;GO:0006886;GO:0006888;GO:0006901;GO:0006996;GO:0007049;GO:0007165;GO:0007264;GO:0008152;GO:0009987;GO:0015031;GO:0015931;GO:0016043;GO:0016050;GO:0016192;GO:0018193;GO:0018196;GO:0018279;GO:0019538;GO:0019882;GO:0019884;GO:0019886;GO:0035556;GO:0043170;GO:0043412;GO:0043413;GO:…		GO:0000139;GO:0005635;GO:0005789;GO:0005829;GO:0012506;GO:0012507;GO:0016020;GO:0030658;GO:0030659;GO:0030662;GO:0031080;GO:0031090;GO:0031967;GO:0031975;GO:0031982;GO:0031988;GO:0032991;GO:0043226;GO:0043227;GO:0043230;GO:0043234;GO:0044421;GO:0044422;GO:0044424;GO:0044425;GO:0044428;GO:0044431;GO:0044432;GO:0044433;GO:0044444;GO:0044446;GO:0044464;GO:0065010;GO:0070062	VFIWTCDDASSNTWSPK	17	2	1	VFIWTC[125.0477]DDASSNTWSPK	VFIWTC[130.0791]DDASSNTWSPK	C	1.13484	NaN	1.70604	NaN	NaN	1.65275	NaN	1.01975	NaN	0.565899	1.41309	1.05987	0.752268	0.468195	1.59157	0.768408	0.781301	0.656106	NaN	NaN	NaN	NaN	NaN	1.12357	0.599534	0.620764	1.47681	NaN	0.471126	0.909491	1.09652
	+	0.124213	1.52688	0.329931	P10809	60 kDa heat shock protein, mitochondrial	HSPD1	237	GO:0001775;GO:0001816;GO:0001817;GO:0001819;GO:0002200;GO:0002204;GO:0002208;GO:0002218;GO:0002221;GO:0002224;GO:0002250;GO:0002252;GO:0002253;GO:0002263;GO:0002285;GO:0002312;GO:0002366;GO:0002367;GO:0002368;GO:0002376;GO:0002440;GO:0002443;GO:0002449;GO:0002460;GO:0002562;GO:0002682;GO:0002684;GO:0002694;GO:0002696;GO:0002697;GO:0002699;GO:0002703;GO:0002705;GO:0002706;GO:0002708;GO:0002709;GO:…	GO:0000166;GO:0001530;GO:0002039;GO:0003676;GO:0003677;GO:0003688;GO:0003697;GO:0003723;GO:0003725;GO:0003824;GO:0005488;GO:0005515;GO:0005524;GO:0016462;GO:0016787;GO:0016817;GO:0016818;GO:0016887;GO:0017076;GO:0017111;GO:0019899;GO:0030554;GO:0031625;GO:0032553;GO:0032555;GO:0032559;GO:0035639;GO:0043565;GO:0043566;GO:0051082;GO:0051087	GO:0005615;GO:0005737;GO:0005739;GO:0005743;GO:0005759;GO:0005768;GO:0005769;GO:0005829;GO:0005886;GO:0005905;GO:0009986;GO:0016020;GO:0016023;GO:0019866;GO:0030135;GO:0030141;GO:0031090;GO:0031410;GO:0031966;GO:0031974;GO:0031982;GO:0031988;GO:0032991;GO:0043226;GO:0043227;GO:0043229;GO:0043230;GO:0043231;GO:0043233;GO:0043234;GO:0043235;GO:0044421;GO:0044422;GO:0044424;GO:0044425;GO:0044429;GO:…	CEFQDAYVLLSEK	13	2	1	C[125.0477]EFQDAYVLLSEK	C[130.0791]EFQDAYVLLSEK	C	1.2609	-2.10087	1.38613	0.685679	2.23743	1.56652	1.56988	1.58782	1.01465	1.03038	1.38119	NaN	2.6643	2.49516	1.98309	2.088	0.197909	1.94464	1.75357	-1.00465	NaN	1.75779	1.81364	2.58847	2.09599	0.512971	1.74134	1.13805	2.25828	2.40424	1.6876
+	+	0.0175948	2.70342	0.329806	Q99832	T-complex protein 1 subunit eta	CCT7	511	GO:0006457;GO:0006458;GO:0007339;GO:0008037;GO:0008152;GO:0009987;GO:0009988;GO:0019538;GO:0022414;GO:0035036;GO:0043170;GO:0044237;GO:0044238;GO:0044260;GO:0044267;GO:0048610;GO:0051084	GO:0000166;GO:0005488;GO:0005515;GO:0005524;GO:0017076;GO:0030554;GO:0032553;GO:0032555;GO:0032559;GO:0035639;GO:0051082	GO:0005737;GO:0005739;GO:0005829;GO:0005832;GO:0005874;GO:0031982;GO:0031988;GO:0032991;GO:0043226;GO:0043227;GO:0043229;GO:0043230;GO:0043231;GO:0043234;GO:0044297;GO:0044421;GO:0044422;GO:0044424;GO:0044430;GO:0044444;GO:0044445;GO:0044446;GO:0044464;GO:0065010;GO:0070062	INALTAASEAACLIVSVDETIK	22	3	1	INALTAASEAAC[125.0477]LIVSVDETIK	INALTAASEAAC[130.0791]LIVSVDETIK	C	NaN	NaN	NaN	NaN	2.34255	NaN	NaN	1.56919	NaN	NaN	0.681723	1.01892	0.357471	0.61336	NaN	0.337004	1.21752	1.49603	NaN	NaN	NaN	NaN	1.07556	0.426548	0.854508	0.915642	1.19223	0.611059	1.18954	0.651568	NaN
	+	0.149422	1.39723	0.327937	P53621	Coatomer subunit alpha	COPA	85	GO:0003008;GO:0006810;GO:0006886;GO:0006890;GO:0006901;GO:0006996;GO:0007589;GO:0009987;GO:0015031;GO:0016043;GO:0016050;GO:0016192;GO:0022600;GO:0030157;GO:0032501;GO:0045184;GO:0046903;GO:0046907;GO:0048193;GO:0048200;GO:0048205;GO:0050878;GO:0051234;GO:0051649;GO:0061024;GO:0065007;GO:0065008;GO:0071840;GO:0071841;GO:0071842	GO:0005198	GO:0005615;GO:0005737;GO:0005829;GO:0016020;GO:0030117;GO:0030120;GO:0030126;GO:0031982;GO:0031988;GO:0032991;GO:0043226;GO:0043227;GO:0043230;GO:0043234;GO:0044421;GO:0044422;GO:0044424;GO:0044425;GO:0044431;GO:0044433;GO:0044444;GO:0044446;GO:0044464;GO:0065010;GO:0070062	CLFTLLGHLDYIR	13	2	1	C[125.0477]LFTLLGHLDYIR	C[130.0791]LFTLLGHLDYIR	C	2.41862	-3.35825	2.20711	NaN	NaN	1.88895	NaN	1.81127	NaN	NaN	1.97185	NaN	2.0716	1.94303	1.76558	2.47092	2.26751	2.40444	1.43686	-2.4387	NaN	1.9246	1.97573	2.3915	2.0278	1.62412	NaN	1.32917	1.76571	2.01493	1.97757
+	+	0.0048	3.38864	0.327566	P09960	Leukotriene A-4 hydrolase	LTA4H	200	GO:0000038;GO:0006082;GO:0006518;GO:0006629;GO:0006631;GO:0006633;GO:0006636;GO:0006690;GO:0006691;GO:0006950;GO:0006952;GO:0006954;GO:0008152;GO:0008610;GO:0009056;GO:0009058;GO:0009611;GO:0009987;GO:0016053;GO:0019369;GO:0019370;GO:0019752;GO:0032787;GO:0033559;GO:0042180;GO:0043171;GO:0043436;GO:0043449;GO:0043450;GO:0044237;GO:0044238;GO:0044248;GO:0044249;GO:0044255;GO:0044281;GO:0044283;GO:…	GO:0003824;GO:0004177;GO:0004301;GO:0004463;GO:0005488;GO:0008233;GO:0008237;GO:0008238;GO:0008270;GO:0016787;GO:0016801;GO:0016803;GO:0043167;GO:0043169;GO:0046872;GO:0046914;GO:0070011	GO:0005654;GO:0005737;GO:0005829;GO:0031982;GO:0031988;GO:0043226;GO:0043227;GO:0043230;GO:0044421;GO:0044422;GO:0044424;GO:0044428;GO:0044444;GO:0044446;GO:0044464;GO:0065010;GO:0070062	FIQKVPIPCYLIALVVGALESR	22	3	1	FIQKVPIPC[125.0477]YLIALVVGALESR	FIQKVPIPC[130.0791]YLIALVVGALESR	C	-0.851187	-2.02151	0.757709	-0.764021	-0.273647	-0.478302	-0.443515	-0.463567	-0.00850609	-0.706938	-0.430119	NaN	0.394179	-0.459506	-0.2491	-0.384122	-0.140406	0.0470595	1.32102	-0.609576	-0.590955	-0.379546	-0.656615	-0.0617516	0.958587	-0.135423	-0.8709	-0.616002	-0.598953	-0.922652	-0.723767
+	+	0.020988	2.60512	0.325586	P33240	Cleavage stimulation factor subunit 2	CSTF2	62	GO:0000375;GO:0000377;GO:0000398;GO:0006139;GO:0006351;GO:0006353;GO:0006366;GO:0006369;GO:0006378;GO:0006379;GO:0006396;GO:0006397;GO:0006807;GO:0008152;GO:0008380;GO:0009058;GO:0009059;GO:0009987;GO:0010467;GO:0016070;GO:0016071;GO:0031123;GO:0031124;GO:0032774;GO:0034641;GO:0034645;GO:0043170;GO:0043631;GO:0044237;GO:0044238;GO:0044249;GO:0044260;GO:0090304;GO:0090305	GO:0000166;GO:0003676;GO:0003723;GO:0005488	GO:0005634;GO:0005654;GO:0005847;GO:0005849;GO:0016604;GO:0032991;GO:0043226;GO:0043227;GO:0043229;GO:0043231;GO:0043234;GO:0044422;GO:0044424;GO:0044428;GO:0044446;GO:0044451;GO:0044464;GO:0071920	GYGFCEYQDQETALSAMR	18	2	1	GYGFC[125.0477]EYQDQETALSAMR	GYGFC[130.0791]EYQDQETALSAMR	C	0.286801	NaN	0.581848	0.450713	NaN	-0.0353356	1.20569	0.0707694	-0.0612843	0.324307	NaN	-0.0676873	NaN	-0.0210988	NaN	0.41782	NaN	0.588476	NaN	NaN	NaN	0.314621	NaN	0.360677	-0.470051	-0.0641082	NaN	0.236286	NaN	-0.135229	0.768369
	+	0.139	1.44469	0.319013	P09104	Gamma-enolase	ENO2	357	GO:0005975;GO:0005996;GO:0006006;GO:0006066;GO:0006094;GO:0008152;GO:0009058;GO:0009987;GO:0016051;GO:0019318;GO:0019319;GO:0034637;GO:0044237;GO:0044238;GO:0044249;GO:0044262;GO:0044281;GO:0044283;GO:0046165;GO:0046364	GO:0000287;GO:0003824;GO:0004634;GO:0005488;GO:0016829;GO:0016835;GO:0016836;GO:0043167;GO:0043169;GO:0046872	GO:0000015;GO:0001917;GO:0005615;GO:0005829;GO:0005886;GO:0016020;GO:0031982;GO:0031988;GO:0032991;GO:0043204;GO:0043226;GO:0043227;GO:0043230;GO:0043234;GO:0044421;GO:0044424;GO:0044444;GO:0044445;GO:0044464;GO:0065010;GO:0070062	VNQIGSVTEAIQACK	15	2	1	VNQIGSVTEAIQAC[125.0477]K	VNQIGSVTEAIQAC[130.0791]K	C	0.176109	-0.308483	0.803329	-0.248311	0.0133447	0.697394	0.00797391	0.534519	NaN	0.385329	0.269177	-0.996841	0.634225	0.319558	0.262447	0.334174	0.405356	0.158583	NaN	NaN	NaN	0.837187	0.706831	0.820058	0.358571	NaN	0.778611	0.0293309	0.190116	0.753001	0.457615
	+	0.138828	1.44739	0.315514	P62937	Peptidyl-prolyl cis-trans isomerase A	PPIA	161	GO:0000413;GO:0001775;GO:0002376;GO:0002576;GO:0006139;GO:0006259;GO:0006260;GO:0006278;GO:0006457;GO:0006464;GO:0006807;GO:0006810;GO:0006887;GO:0006928;GO:0006996;GO:0007596;GO:0007599;GO:0008152;GO:0009058;GO:0009059;GO:0009987;GO:0016032;GO:0016043;GO:0016192;GO:0016477;GO:0018193;GO:0018208;GO:0019058;GO:0019061;GO:0019068;GO:0019076;GO:0019538;GO:0022414;GO:0022415;GO:0022607;GO:0030168;GO:…	GO:0003755;GO:0003824;GO:0005488;GO:0005515;GO:0016853;GO:0016859;GO:0042277;GO:0046790;GO:0051082	GO:0005576;GO:0005615;GO:0005634;GO:0005829;GO:0005912;GO:0005924;GO:0005925;GO:0016020;GO:0030054;GO:0030055;GO:0031982;GO:0031988;GO:0043226;GO:0043227;GO:0043229;GO:0043230;GO:0043231;GO:0044421;GO:0044424;GO:0044444;GO:0044464;GO:0065010;GO:0070062;GO:0070161	KITIADCGQLE	11	2	1	KITIADC[125.0477]GQLE	KITIADC[130.0791]GQLE	C	0.59317	-1.30164	1.24147	1.89976	0.493202	NaN	0.317243	0.202472	0.797417	0.409915	0.547925	0.79796	0.670836	0.729335	1.2953	0.785326	1.29326	0.725571	0.43657	-0.124958	NaN	0.865503	0.456369	0.990878	0.602869	0.265934	-0.324638	0.699258	2.66476	0.4258	1.61734
	+	0.110771	1.59452	0.312997	P62993	Growth factor receptor-bound protein 2	GRB2	32	GO:0001763;GO:0001775;GO:0002009;GO:0002376;GO:0002682;GO:0002684;GO:0002694;GO:0002696;GO:0006461;GO:0006810;GO:0006897;GO:0006898;GO:0006928;GO:0006935;GO:0006950;GO:0006952;GO:0006955;GO:0006974;GO:0007154;GO:0007165;GO:0007166;GO:0007167;GO:0007169;GO:0007173;GO:0007264;GO:0007265;GO:0007267;GO:0007411;GO:0007568;GO:0007596;GO:0007599;GO:0008064;GO:0008152;GO:0008286;GO:0008543;GO:0009314;GO:…	GO:0005070;GO:0005102;GO:0005126;GO:0005154;GO:0005165;GO:0005167;GO:0005168;GO:0005488;GO:0005515;GO:0017124;GO:0019899;GO:0019900;GO:0019901;GO:0019904;GO:0030674;GO:0035591;GO:0042802;GO:0043560;GO:0046875;GO:0060090;GO:0070851	GO:0005634;GO:0005654;GO:0005730;GO:0005737;GO:0005768;GO:0005794;GO:0005829;GO:0005886;GO:0005911;GO:0008180;GO:0012506;GO:0016020;GO:0030054;GO:0031090;GO:0031982;GO:0031988;GO:0032991;GO:0043226;GO:0043227;GO:0043228;GO:0043229;GO:0043230;GO:0043231;GO:0043232;GO:0043234;GO:0044421;GO:0044422;GO:0044424;GO:0044425;GO:0044428;GO:0044444;GO:0044446;GO:0044459;GO:0044464;GO:0065010;GO:0070062;GO:…	VLNEECDQNWYK	12	2	1	VLNEEC[125.0477]DQNWYK	VLNEEC[130.0791]DQNWYK	C	0.494143	NaN	0.962421	0.738502	0.934554	1.78106	1.10867	0.706504	1.19585	0.268765	1.02274	0.819855	0.587097	0.753179	2.33301	0	0.5196	2.35297	1.12528	NaN	NaN	0.952058	0.339109	0.853993	0.769362	2.26553	0.482131	0.775088	0.810829	0.621375	0.327963
	+	0.0908125	1.7387	0.308854	Q14204	Cytoplasmic dynein 1 heavy chain 1	DYNC1H1	2076	GO:0000086;GO:0000226;GO:0000278;GO:0002376;GO:0002478;GO:0002495;GO:0002504;GO:0006810;GO:0006928;GO:0006996;GO:0007010;GO:0007017;GO:0007018;GO:0007049;GO:0007051;GO:0007052;GO:0009987;GO:0016043;GO:0019882;GO:0019884;GO:0019886;GO:0022402;GO:0022607;GO:0022618;GO:0033962;GO:0034063;GO:0034621;GO:0034622;GO:0043933;GO:0048002;GO:0051234;GO:0051293;GO:0051649;GO:0051656;GO:0065003;GO:0071826;GO:…	GO:0000166;GO:0003774;GO:0003777;GO:0003824;GO:0005488;GO:0005524;GO:0016462;GO:0016787;GO:0016817;GO:0016818;GO:0016887;GO:0017076;GO:0017111;GO:0030554;GO:0032553;GO:0032555;GO:0032559;GO:0035639	GO:0005813;GO:0005815;GO:0005829;GO:0005868;GO:0005874;GO:0005875;GO:0016020;GO:0030175;GO:0030286;GO:0031982;GO:0031988;GO:0032991;GO:0042995;GO:0043226;GO:0043227;GO:0043228;GO:0043229;GO:0043230;GO:0043232;GO:0043234;GO:0044421;GO:0044422;GO:0044424;GO:0044430;GO:0044444;GO:0044446;GO:0044464;GO:0065010;GO:0070062	LCDEQLSSQSHYDFGLR	17	2;3	1	LC[125.0477]DEQLSSQSHYDFGLR	LC[130.0791]DEQLSSQSHYDFGLR	C	NaN	NaN	0.553132	NaN	NaN	NaN	NaN	0.295039	NaN	NaN	1.19052	NaN	0.504768	0.31937	NaN	0.658996	0.414276	0.443949	1.14247	NaN	NaN	0.595831	0.445194	0.8631	1.23323	-0.193141	NaN	-0.408791	0.679015	0.559495	0.620862
	+	0.116871	1.56451	0.307341	P52597	Heterogeneous nuclear ribonucleoprotein F	HNRNPF	22;34	GO:0000375;GO:0000377;GO:0000398;GO:0006139;GO:0006396;GO:0006397;GO:0006807;GO:0008152;GO:0008380;GO:0009987;GO:0010467;GO:0010468;GO:0016070;GO:0016071;GO:0019219;GO:0019222;GO:0031323;GO:0034641;GO:0043170;GO:0043484;GO:0044237;GO:0044238;GO:0044260;GO:0050789;GO:0050794;GO:0051171;GO:0051252;GO:0060255;GO:0065007;GO:0080090;GO:0090304	GO:0000166;GO:0003676;GO:0003723;GO:0003727;GO:0005488	GO:0005634;GO:0005654;GO:0005681;GO:0016020;GO:0030529;GO:0032991;GO:0043226;GO:0043227;GO:0043229;GO:0043231;GO:0044422;GO:0044424;GO:0044428;GO:0044446;GO:0044464;GO:0071013	GLPWSCSVEDVQNFLSDCTIHDGAAGVHFIYTR	33	3;4	2	GLPWSC[125.0477]SVEDVQNFLSDC[125.0477]TIHDGAAGVHFIYTR	GLPWSC[130.0791]SVEDVQNFLSDC[130.0791]TIHDGAAGVHFIYTR	C;C	NaN	NaN	NaN	NaN	NaN	NaN	NaN	1.67943	NaN	NaN	NaN	NaN	NaN	NaN	1.83273	NaN	1.41532	1.16565	1.61714	NaN	NaN	NaN	NaN	NaN	2.34079	NaN	NaN	1.38854	NaN	1.51373	NaN
	+	0.0940302	1.71045	0.305749	P02749	Beta-2-glycoprotein 1	APOH	84	GO:0001936;GO:0001937;GO:0006629;GO:0006638;GO:0006639;GO:0006641;GO:0006662;GO:0006810;GO:0006869;GO:0007597;GO:0008152;GO:0008285;GO:0009987;GO:0010594;GO:0010596;GO:0010656;GO:0010660;GO:0010941;GO:0016485;GO:0016525;GO:0018904;GO:0019222;GO:0019538;GO:0022603;GO:0030193;GO:0030194;GO:0030195;GO:0030334;GO:0030336;GO:0031638;GO:0031639;GO:0032101;GO:0032879;GO:0033032;GO:0033033;GO:0034196;GO:…	GO:0001871;GO:0001948;GO:0005488;GO:0005515;GO:0005539;GO:0005543;GO:0008047;GO:0008201;GO:0008289;GO:0030234;GO:0030246;GO:0030247;GO:0042802;GO:0060229;GO:0060230	GO:0005615;GO:0009986;GO:0031982;GO:0031988;GO:0032991;GO:0032994;GO:0034358;GO:0034361;GO:0034364;GO:0034385;GO:0042627;GO:0043226;GO:0043227;GO:0043230;GO:0044421;GO:0044464;GO:0065010;GO:0070062	VCPFAGILENGAVR	14	2	1	VC[125.0477]PFAGILENGAVR	VC[130.0791]PFAGILENGAVR	C	-1.25801	-2.13231	-1.00935	-1.38311	-0.678706	NaN	-1.07187	NaN	NaN	-1.14374	-1.04306	NaN	NaN	NaN	NaN	NaN	-0.292989	NaN	NaN	-0.861355	NaN	NaN	-0.966606	NaN	-1.34745	NaN	-0.900023	NaN	-1.84163	-2.82716	-0.295913
	+	0.0600455	1.98653	0.30277	Q00325	Phosphate carrier protein, mitochondrial	SLC25A3	136	GO:0006091;GO:0006810;GO:0006811;GO:0006817;GO:0006820;GO:0008152;GO:0009987;GO:0015698;GO:0034220;GO:0035435;GO:0044237;GO:0051234;GO:0055085	GO:0005215;GO:0005488;GO:0005515;GO:0008509;GO:0015075;GO:0015103;GO:0015114;GO:0015291;GO:0015293;GO:0015320;GO:0022804;GO:0022857;GO:0022891;GO:0022892;GO:0032403	GO:0005739;GO:0005743;GO:0005887;GO:0016020;GO:0016021;GO:0019866;GO:0031090;GO:0031224;GO:0031226;GO:0031966;GO:0031982;GO:0031988;GO:0043226;GO:0043227;GO:0043229;GO:0043230;GO:0043231;GO:0044421;GO:0044422;GO:0044424;GO:0044425;GO:0044429;GO:0044444;GO:0044446;GO:0044459;GO:0044464;GO:0065010;GO:0070062	GWAPTFLGYSMQGLCK	16	2;3	1	GWAPTFLGYSMQGLC[125.0477]K	GWAPTFLGYSMQGLC[130.0791]K	C	NaN	NaN	2.46957	NaN	NaN	NaN	NaN	1.649	NaN	1.04954	NaN	NaN	1.70835	0.803339	1.9855	0.852942	1.11629	1.0377	1.7323	-1.73376	NaN	NaN	0.94207	NaN	0.8963	0.640248	NaN	0.622512	1.14299	2.16695	1.27744
	+	0.0959881	1.69716	0.299729	P02765	Alpha-2-HS-glycoprotein	AHSG	89	GO:0001501;GO:0001503;GO:0002526;GO:0006810;GO:0006897;GO:0006907;GO:0006950;GO:0006952;GO:0006953;GO:0006954;GO:0009611;GO:0009892;GO:0009966;GO:0009968;GO:0009987;GO:0010324;GO:0010563;GO:0010646;GO:0010648;GO:0016043;GO:0016044;GO:0016192;GO:0019220;GO:0019222;GO:0023051;GO:0023057;GO:0030100;GO:0030278;GO:0030279;GO:0030500;GO:0030502;GO:0031323;GO:0031324;GO:0031347;GO:0032101;GO:0032501;GO:…	GO:0004857;GO:0004866;GO:0004869;GO:0019207;GO:0019210;GO:0030234;GO:0030414;GO:0061134;GO:0061135	GO:0005576;GO:0005615;GO:0031982;GO:0031988;GO:0043226;GO:0043227;GO:0043230;GO:0044421;GO:0065010;GO:0070062;GO:0072562	VWPQQPSGELFEIEIDTLETTCHVLDPTPVAR	32	3	1	VWPQQPSGELFEIEIDTLETTC[125.0477]HVLDPTPVAR	VWPQQPSGELFEIEIDTLETTC[130.0791]HVLDPTPVAR	C	-3.17552	-3.28232	-3.40076	-1.9995	-3.34842	-2.6655	-3.40369	-3.15352	NaN	-2.85671	-3.09668	NaN	-4.19204	NaN	-3.13584	-4.43624	-2.59203	NaN	-3.63325	-2.72285	NaN	-2.89942	-3.40597	-2.44046	-3.83387	NaN	-3.23792	-1.98014	-3.35081	-3.36422	-3.1475
	+	0.0669391	1.91878	0.294971	P21333	Filamin-A	FLNA	1157	GO:0000226;GO:0000902;GO:0000904;GO:0001775;GO:0001837;GO:0002576;GO:0006139;GO:0006140;GO:0006351;GO:0006355;GO:0006356;GO:0006366;GO:0006807;GO:0006810;GO:0006887;GO:0006996;GO:0007010;GO:0007015;GO:0007017;GO:0007051;GO:0007052;GO:0007155;GO:0007165;GO:0007166;GO:0007186;GO:0007187;GO:0007188;GO:0007193;GO:0007194;GO:0007195;GO:0007212;GO:0007264;GO:0007596;GO:0007599;GO:0008104;GO:0008152;GO:…	GO:0001948;GO:0003779;GO:0004871;GO:0005102;GO:0005488;GO:0005515;GO:0008092;GO:0008134;GO:0017016;GO:0017048;GO:0017160;GO:0019899;GO:0031267;GO:0034987;GO:0034988;GO:0042802;GO:0042803;GO:0046983;GO:0048365;GO:0051015;GO:0051020;GO:0060089	GO:0005576;GO:0005634;GO:0005737;GO:0005802;GO:0005829;GO:0005856;GO:0005884;GO:0005886;GO:0005912;GO:0005924;GO:0005925;GO:0015629;GO:0016020;GO:0030054;GO:0030055;GO:0030863;GO:0031523;GO:0031982;GO:0031988;GO:0032991;GO:0043025;GO:0043198;GO:0043226;GO:0043227;GO:0043228;GO:0043229;GO:0043230;GO:0043231;GO:0043232;GO:0043234;GO:0044297;GO:0044421;GO:0044422;GO:0044424;GO:0044427;GO:0044428;GO:…	AHVVPCFDASK	11	2	1	AHVVPC[125.0477]FDASK	AHVVPC[130.0791]FDASK	C	0.279843	NaN	-0.103963	0.500235	-0.183644	-0.766792	-0.0638613	-0.226568	-0.0217439	0.123528	-0.0193629	-0.577719	-0.687098	-0.716214	-0.389524	-0.643332	-0.320713	-0.505726	-0.438238	-2.34126	1.55727	0.411895	-0.397173	-0.570325	-0.22246	-0.826134	-0.317212	-0.47843	-0.427972	-0.363646	-0.677223
+	+	0.0231186	2.53221	0.292095	P50570	Dynamin-2	DNM2	427	GO:0000041;GO:0000086;GO:0001558;GO:0002376;GO:0002478;GO:0002495;GO:0002504;GO:0006355;GO:0006807;GO:0006810;GO:0006811;GO:0006812;GO:0006826;GO:0006892;GO:0006897;GO:0006898;GO:0007165;GO:0008152;GO:0009653;GO:0009889;GO:0009891;GO:0009893;GO:0009987;GO:0010324;GO:0010468;GO:0010556;GO:0010557;GO:0010604;GO:0010628;GO:0010769;GO:0010941;GO:0010942;GO:0010975;GO:0015031;GO:0015682;GO:0016043;GO:…	GO:0000166;GO:0003824;GO:0003924;GO:0005488;GO:0005515;GO:0005525;GO:0008017;GO:0008092;GO:0015631;GO:0016462;GO:0016787;GO:0016817;GO:0016818;GO:0017076;GO:0017111;GO:0017124;GO:0019001;GO:0019899;GO:0019904;GO:0032553;GO:0032555;GO:0032561;GO:0035639	GO:0000139;GO:0005737;GO:0005794;GO:0005829;GO:0005874;GO:0005886;GO:0005905;GO:0005912;GO:0005924;GO:0005925;GO:0012506;GO:0014069;GO:0016020;GO:0030054;GO:0030055;GO:0030496;GO:0030659;GO:0030666;GO:0031090;GO:0031982;GO:0031988;GO:0032991;GO:0043226;GO:0043227;GO:0043229;GO:0043230;GO:0043231;GO:0043234;GO:0044421;GO:0044422;GO:0044424;GO:0044425;GO:0044430;GO:0044431;GO:0044433;GO:0044444;GO:…	CVDLVIQELINTVR	14	2	1	C[125.0477]VDLVIQELINTVR	C[130.0791]VDLVIQELINTVR	C	2.69729	-0.928299	2.70221	2.61097	2.47684	2.83821	2.84727	2.39771	2.82175	1.6348	2.38379	NaN	2.29568	2.61374	2.72168	2.57787	2.54399	2.73051	2.24423	0.103381	2.91889	NaN	2.60926	2.8888	2.54759	2.89598	2.04713	1.67847	2.47075	2.32749	2.4156
+	+	0.0137021	2.83234	0.284582	O95833	Chloride intracellular channel protein 3	CLIC3	174	GO:0006810;GO:0006811;GO:0006820;GO:0006821;GO:0007165;GO:0009987;GO:0015698;GO:0050789;GO:0050794;GO:0050896;GO:0051234;GO:0051716;GO:0065007	GO:0005215;GO:0005216;GO:0005244;GO:0005253;GO:0005254;GO:0008509;GO:0015075;GO:0015267;GO:0022803;GO:0022832;GO:0022836;GO:0022838;GO:0022857;GO:0022891;GO:0022892	GO:0005634;GO:0005737;GO:0031982;GO:0031988;GO:0032991;GO:0034702;GO:0034707;GO:0043226;GO:0043227;GO:0043229;GO:0043230;GO:0043231;GO:0043234;GO:0044421;GO:0044424;GO:0044425;GO:0044464;GO:0065010;GO:0070062	FLDGDRLTLADCSLLPK	17	3	1	FLDGDRLTLADC[125.0477]SLLPK	FLDGDRLTLADC[130.0791]SLLPK	C	-0.153364	NaN	-0.0878571	0.166261	NaN	-0.417728	0.19127	NaN	0.0425379	NaN	-0.149103	NaN	NaN	NaN	0.302387	-0.798943	-0.423701	NaN	-0.476982	NaN	-0.056293	-0.0908884	-0.640628	-0.237269	-0.37479	NaN	-0.276818	NaN	-0.157382	NaN	-0.783137
+	+	0.044713	2.15618	0.284013	P62879	Guanine nucleotide-binding protein G(I)/G(S)/G(T) subunit beta-2	GNB2	294	GO:0006091;GO:0006112;GO:0007154;GO:0007165;GO:0007166;GO:0007186;GO:0007267;GO:0007268;GO:0008152;GO:0009719;GO:0009725;GO:0009987;GO:0010033;GO:0015980;GO:0023052;GO:0032870;GO:0033762;GO:0042221;GO:0043434;GO:0044237;GO:0044281;GO:0050789;GO:0050794;GO:0050896;GO:0051716;GO:0055114;GO:0065007;GO:0070887;GO:0071310;GO:0071375;GO:0071377;GO:0071495	GO:0003824;GO:0003924;GO:0004871;GO:0005246;GO:0005488;GO:0005515;GO:0016247;GO:0016462;GO:0016787;GO:0016817;GO:0016818;GO:0017111;GO:0019899;GO:0032403;GO:0051020;GO:0060089	GO:0005615;GO:0005765;GO:0005774;GO:0005886;GO:0005912;GO:0005924;GO:0005925;GO:0016020;GO:0030054;GO:0030055;GO:0031090;GO:0031982;GO:0031988;GO:0032991;GO:0043226;GO:0043227;GO:0043230;GO:0043234;GO:0044297;GO:0044421;GO:0044422;GO:0044424;GO:0044437;GO:0044444;GO:0044446;GO:0044464;GO:0048471;GO:0065010;GO:0070062;GO:0070161	LLLAGYDDFNCNIWDAMK	18	2	1	LLLAGYDDFNC[125.0477]NIWDAMK	LLLAGYDDFNC[130.0791]NIWDAMK	C	1.33297	-2.02573	1.13721	NaN	0.90923	0.451976	1.13891	1.1681	0.950632	0.770322	1.28685	0.404676	0.971876	1.03167	0.9626	1.1883	0.571994	0.842645	1.21536	-0.0681161	1.08924	0.8393	0.895396	NaN	1.06587	1.47916	0.440759	0.556914	0.879573	1.5723	0.375465
	+	0.0851576	1.7743	0.28186	Q00610	Clathrin heavy chain 1	CLTC	459	GO:0000041;GO:0000280;GO:0001649;GO:0002376;GO:0002478;GO:0002495;GO:0002504;GO:0006810;GO:0006811;GO:0006812;GO:0006826;GO:0006886;GO:0006892;GO:0006897;GO:0006898;GO:0006996;GO:0007067;GO:0008152;GO:0009987;GO:0010324;GO:0015031;GO:0015682;GO:0016043;GO:0016044;GO:0016192;GO:0019882;GO:0019884;GO:0019886;GO:0022402;GO:0022403;GO:0030001;GO:0030154;GO:0031623;GO:0032502;GO:0033572;GO:0043112;GO:…	GO:0003676;GO:0003723;GO:0003725;GO:0005198;GO:0005488;GO:0005515;GO:0019899;GO:0019900;GO:0019901;GO:0030276;GO:0032051	GO:0000139;GO:0005737;GO:0005819;GO:0005829;GO:0005886;GO:0005912;GO:0005924;GO:0005925;GO:0012506;GO:0016020;GO:0016023;GO:0030054;GO:0030055;GO:0030117;GO:0030118;GO:0030120;GO:0030125;GO:0030130;GO:0030132;GO:0030135;GO:0030136;GO:0030659;GO:0030662;GO:0030665;GO:0030666;GO:0030669;GO:0031090;GO:0031410;GO:0031982;GO:0031988;GO:0032588;GO:0032991;GO:0042470;GO:0043226;GO:0043227;GO:0043228;GO:…	EDKLECSEELGDLVK	15	2;3	1	EDKLEC[125.0477]SEELGDLVK	EDKLEC[130.0791]SEELGDLVK	C	1.8315	NaN	1.67091	NaN	2.56607	1.96605	2.02869	1.34361	2.60102	0.983397	1.74874	1.63696	1.7072	1.65114	2.0071	1.42629	1.25391	1.41308	2.01991	NaN	NaN	2.35399	1.10116	1.51507	1.6559	1.85773	0.0778605	0.946969	1.71781	1.10552	1.35536
	+	0.128515	1.50388	0.281152	P15311	Ezrin	EZR	284	GO:0001885;GO:0002064;GO:0003376;GO:0006810;GO:0006897;GO:0006898;GO:0006935;GO:0006996;GO:0007010;GO:0007015;GO:0007016;GO:0007155;GO:0007159;GO:0007163;GO:0007165;GO:0007411;GO:0008152;GO:0008360;GO:0009605;GO:0009893;GO:0009987;GO:0010324;GO:0010468;GO:0010604;GO:0010628;GO:0016043;GO:0016044;GO:0016192;GO:0016337;GO:0019222;GO:0022406;GO:0022603;GO:0022604;GO:0022607;GO:0022610;GO:0022614;GO:…	GO:0003779;GO:0005488;GO:0005515;GO:0008092;GO:0050839;GO:0051015	GO:0001726;GO:0001931;GO:0005615;GO:0005730;GO:0005737;GO:0005829;GO:0005856;GO:0005884;GO:0005886;GO:0005902;GO:0005903;GO:0005912;GO:0005924;GO:0005925;GO:0015629;GO:0016020;GO:0016323;GO:0016324;GO:0019898;GO:0030054;GO:0030055;GO:0030175;GO:0030315;GO:0030863;GO:0031253;GO:0031256;GO:0031528;GO:0031982;GO:0031988;GO:0032587;GO:0032991;GO:0042995;GO:0043226;GO:0043227;GO:0043228;GO:0043229;GO:…	ILQLCMGNHELYMR	14	2;3	1	ILQLC[125.0477]MGNHELYMR	ILQLC[130.0791]MGNHELYMR	C	-3.06061	-1.65849	-0.0845161	NaN	0.0975577	0.18779	0.159372	-1.8646	0.571111	-0.748293	-0.153583	-0.113874	-0.204586	-2.19458	0.167869	-0.145448	-0.243239	-0.306008	0.193646	-1.5193	-0.0670437	0.148282	-0.0796559	NaN	-2.75662	-2.50799	-0.0473465	-0.226615	-0.4039	-0.885113	-0.556813
	+	0.0556	2.02251	0.280006	Q9UL46	Proteasome activator complex subunit 2	PSME2	118	GO:0000082;GO:0000209;GO:0000278;GO:0002218;GO:0002220;GO:0002223;GO:0002253;GO:0002376;GO:0002429;GO:0002474;GO:0002478;GO:0002479;GO:0002682;GO:0002684;GO:0002757;GO:0002758;GO:0002764;GO:0002768;GO:0006464;GO:0006508;GO:0006511;GO:0006521;GO:0006807;GO:0006915;GO:0006950;GO:0006952;GO:0006955;GO:0006974;GO:0006977;GO:0007049;GO:0007165;GO:0007166;GO:0008152;GO:0008219;GO:0009056;GO:0009057;GO:…		GO:0000502;GO:0005654;GO:0005829;GO:0008537;GO:0016020;GO:0031982;GO:0031988;GO:0032991;GO:0043226;GO:0043227;GO:0043230;GO:0043234;GO:0044421;GO:0044422;GO:0044424;GO:0044428;GO:0044444;GO:0044446;GO:0044464;GO:0065010;GO:0070062	CILVITWIQHLIPK	14	2;3	1	C[125.0477]ILVITWIQHLIPK	C[130.0791]ILVITWIQHLIPK	C	2.86802	-0.434933	3.0196	3.0228	3.19919	3.308	3.35604	3.21373	3.66826	2.79263	2.96438	3.38473	NaN	3.42446	3.77492	2.96311	3.23898	3.36661	2.98527	0.0737977	3.18242	NaN	3.18381	3.28135	2.88362	3.0385	2.94172	2.75649	3.08711	2.88632	2.86541
+	+	0.0390431	2.24974	0.277522	P35268	60S ribosomal protein L22	RPL22	25	GO:0000184;GO:0000956;GO:0001775;GO:0002376;GO:0002521;GO:0006139;GO:0006401;GO:0006402;GO:0006412;GO:0006413;GO:0006414;GO:0006415;GO:0006605;GO:0006612;GO:0006613;GO:0006614;GO:0006807;GO:0006810;GO:0006886;GO:0008152;GO:0009056;GO:0009057;GO:0009058;GO:0009059;GO:0009987;GO:0010467;GO:0015031;GO:0016032;GO:0016043;GO:0016070;GO:0016071;GO:0019058;GO:0019083;GO:0019538;GO:0022411;GO:0022414;GO:…	GO:0001871;GO:0003676;GO:0003723;GO:0003735;GO:0005198;GO:0005488;GO:0005539;GO:0008201;GO:0030246;GO:0030247	GO:0005634;GO:0005737;GO:0005829;GO:0005912;GO:0005924;GO:0005925;GO:0015934;GO:0022625;GO:0030054;GO:0030055;GO:0030529;GO:0031982;GO:0031988;GO:0032991;GO:0043226;GO:0043227;GO:0043229;GO:0043230;GO:0043231;GO:0044421;GO:0044422;GO:0044424;GO:0044444;GO:0044446;GO:0044464;GO:0065010;GO:0070062;GO:0070161	FTLDCTHPVEDGIMDAANFEQFLQER	26	3	1	FTLDC[125.0477]THPVEDGIMDAANFEQFLQER	FTLDC[130.0791]THPVEDGIMDAANFEQFLQER	C	0.81229	NaN	0.768704	NaN	1.00938	0.706029	0.875983	0.782847	0.72065	0.68983	0.660315	NaN	0.851377	0.300164	0.924363	-0.233849	0.785536	0.357916	0.639298	NaN	1.03723	1.18928	0.546028	1.15302	0.743061	-0.111898	0.759529	-0.444554	-0.833675	0.580882	0.56332
	+	0.101882	1.64648	0.272127	O75369	Filamin-B	FLNB	2057	GO:0006996;GO:0007010;GO:0007016;GO:0007165;GO:0007166;GO:0007519;GO:0009888;GO:0009987;GO:0010033;GO:0014706;GO:0016043;GO:0019221;GO:0030029;GO:0030036;GO:0030154;GO:0032502;GO:0032507;GO:0034097;GO:0042221;GO:0045185;GO:0048856;GO:0048869;GO:0050789;GO:0050794;GO:0050896;GO:0051235;GO:0051651;GO:0051716;GO:0060537;GO:0065007;GO:0065008;GO:0070887;GO:0071310;GO:0071345;GO:0071840;GO:0071841;GO:…	GO:0003779;GO:0005488;GO:0005515;GO:0008092;GO:0042802	GO:0001725;GO:0005737;GO:0005829;GO:0005856;GO:0005886;GO:0005912;GO:0005924;GO:0005925;GO:0005938;GO:0015629;GO:0016020;GO:0016021;GO:0030018;GO:0030054;GO:0030055;GO:0031224;GO:0031982;GO:0031988;GO:0032432;GO:0042641;GO:0043226;GO:0043227;GO:0043228;GO:0043229;GO:0043230;GO:0043232;GO:0044421;GO:0044422;GO:0044424;GO:0044425;GO:0044430;GO:0044444;GO:0044446;GO:0044449;GO:0044464;GO:0065010;GO:…	DAGYGGISLAVEGPSKVDIQTEDLEDGTCK	30	3	1	DAGYGGISLAVEGPSKVDIQTEDLEDGTC[125.0477]K	DAGYGGISLAVEGPSKVDIQTEDLEDGTC[130.0791]K	C	1.71438	NaN	2.56052	NaN	NaN	1.3936	2.34299	1.498	1.85572	1.9769	1.10758	1.20979	1.46105	0.968495	1.7556	1.10673	0.652532	0.654927	1.87444	NaN	NaN	NaN	0.27458	1.0235	1.45176	0.841566	1.88988	0.550936	1.07732	NaN	0.866253
	+	0.0681958	1.90198	0.271127	P33121	Long-chain-fatty-acid--CoA ligase 1	ACSL1	311	GO:0001676;GO:0001932;GO:0006082;GO:0006629;GO:0006631;GO:0006637;GO:0006638;GO:0006639;GO:0006641;GO:0006662;GO:0006732;GO:0006805;GO:0007165;GO:0007166;GO:0007584;GO:0008152;GO:0008610;GO:0009056;GO:0009058;GO:0009108;GO:0009605;GO:0009987;GO:0009991;GO:0010033;GO:0014070;GO:0018904;GO:0019220;GO:0019221;GO:0019222;GO:0019432;GO:0019752;GO:0031323;GO:0031399;GO:0031667;GO:0032268;GO:0032787;GO:…	GO:0000166;GO:0003824;GO:0004467;GO:0005488;GO:0005524;GO:0015645;GO:0016874;GO:0016877;GO:0017076;GO:0030554;GO:0032553;GO:0032555;GO:0032559;GO:0035639	GO:0005739;GO:0005741;GO:0005778;GO:0005789;GO:0005886;GO:0016020;GO:0016021;GO:0019867;GO:0031090;GO:0031224;GO:0031903;GO:0031966;GO:0031968;GO:0042579;GO:0043226;GO:0043227;GO:0043229;GO:0043231;GO:0044422;GO:0044424;GO:0044425;GO:0044429;GO:0044432;GO:0044438;GO:0044439;GO:0044444;GO:0044446;GO:0044464	ATENTVNPCPDDTLISFLPLAHMFER	26	3	1	ATENTVNPC[125.0477]PDDTLISFLPLAHMFER	ATENTVNPC[130.0791]PDDTLISFLPLAHMFER	C	1.16625	NaN	NaN	NaN	NaN	NaN	1.75736	NaN	NaN	NaN	NaN	NaN	0.418652	0.250994	NaN	0.49011	1.02312	0.669689	1.48145	NaN	NaN	NaN	0.791978	0.772751	1.05748	0.752604	1.08795	NaN	1.63808	NaN	0.738753
+	+	0.0479163	2.11291	0.268853	P21964	Catechol O-methyltransferase	COMT	83	GO:0001505;GO:0002237;GO:0003008;GO:0006066;GO:0006521;GO:0006576;GO:0006584;GO:0006629;GO:0006725;GO:0006730;GO:0006805;GO:0006807;GO:0006950;GO:0007154;GO:0007267;GO:0007268;GO:0007565;GO:0007610;GO:0007611;GO:0007612;GO:0007613;GO:0007614;GO:0008152;GO:0008202;GO:0008210;GO:0008285;GO:0009056;GO:0009058;GO:0009267;GO:0009308;GO:0009310;GO:0009605;GO:0009607;GO:0009712;GO:0009892;GO:0009893;GO:…	GO:0000287;GO:0003824;GO:0005488;GO:0008168;GO:0008171;GO:0008757;GO:0016206;GO:0016740;GO:0016741;GO:0043167;GO:0043169;GO:0046872	GO:0005739;GO:0005829;GO:0005886;GO:0016020;GO:0016021;GO:0030424;GO:0031224;GO:0031982;GO:0031988;GO:0042995;GO:0043005;GO:0043197;GO:0043226;GO:0043227;GO:0043229;GO:0043230;GO:0043231;GO:0044297;GO:0044309;GO:0044421;GO:0044424;GO:0044425;GO:0044444;GO:0044456;GO:0044463;GO:0044464;GO:0045211;GO:0065010;GO:0070062;GO:0097060	ILNHVLQHAEPGNAQSVLEAIDTYCEQK	28	3;4	1	ILNHVLQHAEPGNAQSVLEAIDTYC[125.0477]EQK	ILNHVLQHAEPGNAQSVLEAIDTYC[130.0791]EQK	C	-0.045513	NaN	-0.0398001	NaN	NaN	0.0355326	-0.0255112	0.069337	NaN	0.00846316	0.261522	0.156226	NaN	NaN	0.0176084	NaN	-0.127153	-0.150708	-0.0410156	NaN	0.657885	NaN	0.106748	0.208321	0.300964	0.17435	NaN	0.159168	NaN	-0.0874878	0.138154
+	+	0.000117647	4.77556	0.268258	P13639	Elongation factor 2	EEF2	466	GO:0002244;GO:0006412;GO:0006414;GO:0006417;GO:0006464;GO:0008152;GO:0009058;GO:0009059;GO:0009889;GO:0009891;GO:0009893;GO:0009987;GO:0010467;GO:0010468;GO:0010556;GO:0010557;GO:0010604;GO:0010608;GO:0017182;GO:0017183;GO:0018193;GO:0018202;GO:0019222;GO:0019538;GO:0030154;GO:0031323;GO:0031325;GO:0031326;GO:0031328;GO:0032268;GO:0032270;GO:0032502;GO:0034645;GO:0043170;GO:0043412;GO:0043687;GO:…	GO:0000166;GO:0003676;GO:0003723;GO:0003746;GO:0003824;GO:0003924;GO:0005488;GO:0005515;GO:0005525;GO:0008135;GO:0016462;GO:0016787;GO:0016817;GO:0016818;GO:0017076;GO:0017111;GO:0019001;GO:0019899;GO:0019900;GO:0019901;GO:0032553;GO:0032555;GO:0032561;GO:0035639	GO:0005634;GO:0005737;GO:0005829;GO:0005844;GO:0005886;GO:0016020;GO:0016234;GO:0016235;GO:0030529;GO:0031982;GO:0031988;GO:0032991;GO:0043226;GO:0043227;GO:0043229;GO:0043230;GO:0043231;GO:0044421;GO:0044424;GO:0044444;GO:0044464;GO:0065010;GO:0070062	YVEPIEDVPCGNIVGLVGVDQFLVK	25	3	1	YVEPIEDVPC[125.0477]GNIVGLVGVDQFLVK	YVEPIEDVPC[130.0791]GNIVGLVGVDQFLVK	C	0.396473	-0.892486	0.552828	0.311496	1.00565	0.47913	0.694607	0.50339	NaN	0.180139	0.587849	0.323409	0.319378	0.387345	0.587115	0.395853	0.345988	0.465079	0.723092	-0.360094	NaN	0.456499	0.501504	0.472808	0.378378	0.478589	0.473191	0.163279	0.549582	0.327067	0.279024
	+	0.100323	1.66313	0.262969	P13010	X-ray repair cross-complementing protein 5	XRCC5	157	GO:0000723;GO:0000726;GO:0001817;GO:0001819;GO:0002376;GO:0006139;GO:0006259;GO:0006281;GO:0006302;GO:0006303;GO:0006310;GO:0006351;GO:0006355;GO:0006807;GO:0006950;GO:0006952;GO:0006955;GO:0006970;GO:0006972;GO:0006974;GO:0006996;GO:0007420;GO:0008152;GO:0008283;GO:0009058;GO:0009059;GO:0009314;GO:0009628;GO:0009651;GO:0009889;GO:0009890;GO:0009892;GO:0009987;GO:0010033;GO:0010165;GO:0010212;GO:…	GO:0000166;GO:0000975;GO:0001067;GO:0003676;GO:0003677;GO:0003678;GO:0003684;GO:0003690;GO:0003824;GO:0004003;GO:0004386;GO:0005488;GO:0005515;GO:0005524;GO:0008022;GO:0008026;GO:0008094;GO:0016462;GO:0016787;GO:0016817;GO:0016818;GO:0016887;GO:0017076;GO:0017111;GO:0019899;GO:0030554;GO:0031625;GO:0032553;GO:0032555;GO:0032559;GO:0035639;GO:0042162;GO:0042623;GO:0043565;GO:0043566;GO:0044212;GO:…	GO:0000781;GO:0000782;GO:0000783;GO:0000784;GO:0005634;GO:0005654;GO:0005730;GO:0005829;GO:0005886;GO:0016020;GO:0032991;GO:0032993;GO:0043226;GO:0043227;GO:0043228;GO:0043229;GO:0043231;GO:0043232;GO:0043234;GO:0043564;GO:0044422;GO:0044424;GO:0044427;GO:0044428;GO:0044444;GO:0044446;GO:0044454;GO:0044464;GO:0070419	CDISLQFFLPFSLGK	15	2	1	C[125.0477]DISLQFFLPFSLGK	C[130.0791]DISLQFFLPFSLGK	C	1.00537	-0.835763	1.44651	NaN	NaN	1.677	NaN	1.1269	NaN	0.871382	1.60557	NaN	1.91087	2.05259	2.05388	1.83388	1.67299	0.816082	1.6886	NaN	NaN	NaN	1.7012	NaN	1.84071	0.664002	NaN	1.15721	2.02157	1.76789	1.67787
	+	0.13852	1.45084	0.261741	O00151	PDZ and LIM domain protein 1	PDLIM1	307	GO:0001666;GO:0006355;GO:0006950;GO:0006979;GO:0009889;GO:0010468;GO:0010556;GO:0019219;GO:0019222;GO:0031323;GO:0031326;GO:0042221;GO:0050789;GO:0050794;GO:0050896;GO:0051171;GO:0051252;GO:0060255;GO:0065007;GO:0070482;GO:0080090;GO:2000112	GO:0000988;GO:0000989;GO:0003712;GO:0003713;GO:0005488;GO:0008270;GO:0043167;GO:0043169;GO:0046872;GO:0046914	GO:0005667;GO:0005737;GO:0005856;GO:0005912;GO:0005924;GO:0005925;GO:0030054;GO:0030055;GO:0032991;GO:0043226;GO:0043228;GO:0043229;GO:0043232;GO:0043234;GO:0044422;GO:0044424;GO:0044428;GO:0044446;GO:0044451;GO:0044464;GO:0070161	GHFFVEDQIYCEK	13	2	1	GHFFVEDQIYC[125.0477]EK	GHFFVEDQIYC[130.0791]EK	C	1.25392	NaN	1.20092	1.15278	1.13075	1.00042	1.32464	0.962534	1.45942	1.41386	1.61747	NaN	1.03302	NaN	1.37487	1.48117	1.14603	0.759578	NaN	NaN	1.30429	1.43209	1.23442	0.784401	NaN	1.08978	NaN	NaN	1.30672	NaN	1.36304
+	+	0.00993846	2.99301	0.260416	P35579	Myosin-9	MYH9	91	GO:0000212;GO:0000226;GO:0000768;GO:0000910;GO:0001525;GO:0001701;GO:0001767;GO:0001768;GO:0002376;GO:0002521;GO:0002573;GO:0006508;GO:0006509;GO:0006810;GO:0006911;GO:0006928;GO:0006935;GO:0006949;GO:0006996;GO:0007010;GO:0007017;GO:0007051;GO:0007155;GO:0007163;GO:0007165;GO:0007166;GO:0007167;GO:0007169;GO:0007229;GO:0007264;GO:0007411;GO:0007520;GO:0008152;GO:0008277;GO:0008360;GO:0009605;GO:…	GO:0000146;GO:0000166;GO:0003774;GO:0003779;GO:0003824;GO:0005488;GO:0005515;GO:0005524;GO:0008092;GO:0016462;GO:0016787;GO:0016817;GO:0016818;GO:0016887;GO:0017076;GO:0017111;GO:0019904;GO:0030554;GO:0030898;GO:0032553;GO:0032555;GO:0032559;GO:0035639;GO:0042623;GO:0042802;GO:0042803;GO:0043495;GO:0043531;GO:0046983;GO:0051015	GO:0001725;GO:0001726;GO:0001772;GO:0001931;GO:0005634;GO:0005737;GO:0005819;GO:0005826;GO:0005829;GO:0005856;GO:0005886;GO:0005911;GO:0005912;GO:0005913;GO:0015629;GO:0016020;GO:0016459;GO:0016460;GO:0030054;GO:0031252;GO:0031594;GO:0031982;GO:0031988;GO:0032154;GO:0032155;GO:0032432;GO:0032991;GO:0042641;GO:0042995;GO:0043226;GO:0043227;GO:0043228;GO:0043229;GO:0043230;GO:0043231;GO:0043232;GO:…	FSKVEDMAELTCLNEASVLHNLK	23	3;4	1	FSKVEDMAELTC[125.0477]LNEASVLHNLK	FSKVEDMAELTC[130.0791]LNEASVLHNLK	C	0.360142	NaN	0.280649	NaN	1.52407	-0.401846	NaN	0.242702	NaN	-0.136917	0.354115	0.7556	0.248183	0.650505	0.387812	0.788743	0.554609	0.584682	0.249101	-1.09486	NaN	NaN	0.627997	0.533957	0.434891	0.576482	0.376797	0.464555	0.490127	0.439039	0.347239
	+	0.115077	1.57438	0.260247	P30048	Thioredoxin-dependent peroxide reductase, mitochondrial	PRDX3	229	GO:0000302;GO:0001893;GO:0002237;GO:0006355;GO:0006464;GO:0006873;GO:0006950;GO:0006979;GO:0006996;GO:0007005;GO:0008152;GO:0008284;GO:0009056;GO:0009607;GO:0009889;GO:0009987;GO:0010033;GO:0010035;GO:0010466;GO:0010468;GO:0010556;GO:0010941;GO:0016043;GO:0018158;GO:0018171;GO:0018193;GO:0018198;GO:0019219;GO:0019220;GO:0019222;GO:0019538;GO:0019725;GO:0030099;GO:0030154;GO:0031323;GO:0031326;GO:…	GO:0003824;GO:0004601;GO:0004857;GO:0004866;GO:0004869;GO:0005488;GO:0005515;GO:0008022;GO:0008379;GO:0008785;GO:0016209;GO:0016491;GO:0016651;GO:0016667;GO:0016668;GO:0016684;GO:0016705;GO:0019899;GO:0019900;GO:0019901;GO:0030234;GO:0030414;GO:0043027;GO:0043028;GO:0051920;GO:0061134;GO:0061135	GO:0005737;GO:0005739;GO:0005759;GO:0005768;GO:0005769;GO:0005829;GO:0031974;GO:0031982;GO:0031988;GO:0043226;GO:0043227;GO:0043229;GO:0043230;GO:0043231;GO:0043233;GO:0044421;GO:0044422;GO:0044424;GO:0044429;GO:0044444;GO:0044446;GO:0044464;GO:0065010;GO:0070013;GO:0070062	AFQYVETHGEVCPANWTPDSPTIKPSPAASK	31	3;4	1	AFQYVETHGEVC[125.0477]PANWTPDSPTIKPSPAASK	AFQYVETHGEVC[130.0791]PANWTPDSPTIKPSPAASK	C	-1.8892	NaN	-1.31243	-0.92521	-0.926115	-1.4546	-1.35643	-1.45593	-0.305985	-1.03318	-0.731957	0.196526	-1.22925	-1.9411	0.114736	-1.53326	-2.06313	0.572981	-0.81304	NaN	NaN	-1.30563	-0.184602	-1.19423	-1.83105	-2.07661	-2.0619	0.568824	-1.13628	-2.32484	-2.61343
	+	0.132957	1.47913	0.253223	Q14498	RNA-binding protein 39	RBM39	478	GO:0006139;GO:0006351;GO:0006355;GO:0006396;GO:0006397;GO:0006807;GO:0008152;GO:0008380;GO:0009058;GO:0009059;GO:0009889;GO:0009987;GO:0010468;GO:0010556;GO:0016070;GO:0016071;GO:0019219;GO:0019222;GO:0031323;GO:0031326;GO:0032774;GO:0034641;GO:0034645;GO:0043170;GO:0044237;GO:0044238;GO:0044249;GO:0044260;GO:0050789;GO:0050794;GO:0051171;GO:0051252;GO:0060255;GO:0065007;GO:0080090;GO:0090304;GO:…	GO:0000166;GO:0005488	GO:0005654;GO:0005815;GO:0005856;GO:0015630;GO:0016604;GO:0016607;GO:0043226;GO:0043228;GO:0043229;GO:0043232;GO:0044422;GO:0044424;GO:0044428;GO:0044430;GO:0044444;GO:0044446;GO:0044451;GO:0044464	CPSIAAAIAAVNALHGR	17	2	1	C[125.0477]PSIAAAIAAVNALHGR	C[130.0791]PSIAAAIAAVNALHGR	C	NaN	NaN	NaN	NaN	NaN	NaN	NaN	0.676944	NaN	-0.0343519	NaN	NaN	2.09386	1.11361	NaN	1.38769	0.643129	1.05494	0.983575	NaN	NaN	NaN	NaN	1.13902	0.992289	0.82953	NaN	-0.12097	0.49977	NaN	NaN
	+	0.0672766	1.91273	0.25247	Q96C86	m7GpppX diphosphatase	DCPS	222	GO:0000288;GO:0000290;GO:0000291;GO:0000375;GO:0000377;GO:0000398;GO:0000956;GO:0006139;GO:0006396;GO:0006397;GO:0006401;GO:0006402;GO:0006807;GO:0008152;GO:0008380;GO:0009056;GO:0009057;GO:0009987;GO:0010467;GO:0010941;GO:0016070;GO:0016071;GO:0034641;GO:0043067;GO:0043069;GO:0043170;GO:0043928;GO:0044237;GO:0044238;GO:0044248;GO:0044260;GO:0044265;GO:0045292;GO:0048519;GO:0048523;GO:0050789;GO:…	GO:0000339;GO:0000340;GO:0003676;GO:0003723;GO:0003824;GO:0005488;GO:0016462;GO:0016787;GO:0016817;GO:0016818;GO:0050072	GO:0005634;GO:0005654;GO:0005737;GO:0005739;GO:0005829;GO:0043226;GO:0043227;GO:0043229;GO:0043231;GO:0044422;GO:0044424;GO:0044428;GO:0044444;GO:0044446;GO:0044464	WNQQQLDDLYLIAICHR	17	3	1	WNQQQLDDLYLIAIC[125.0477]HR	WNQQQLDDLYLIAIC[130.0791]HR	C	0.658206	NaN	0.277285	0.192875	NaN	-0.413781	0.929964	0.391985	NaN	0.041818	1.04936	NaN	NaN	1.0433	1.03286	0.834296	0.300338	0.475931	1.27297	NaN	NaN	NaN	0.748211	0.937502	NaN	0.791201	NaN	0.655495	0.862773	0.812042	NaN
	+	0.0624812	1.96555	0.249038	Q86UX7	Fermitin family homolog 3	FERMT3	128	GO:0000902;GO:0000904;GO:0006461;GO:0007155;GO:0007159;GO:0007165;GO:0007166;GO:0007229;GO:0009653;GO:0009987;GO:0016043;GO:0016337;GO:0022407;GO:0022607;GO:0022610;GO:0030155;GO:0031589;GO:0032502;GO:0032989;GO:0033622;GO:0033628;GO:0033632;GO:0034109;GO:0034446;GO:0043933;GO:0048869;GO:0050789;GO:0050794;GO:0050896;GO:0051716;GO:0065003;GO:0065007;GO:0070527;GO:0071822;GO:0071840	GO:0005102;GO:0005178;GO:0005488;GO:0005515;GO:0032403	GO:0002102;GO:0016020;GO:0030054;GO:0031982;GO:0031988;GO:0032991;GO:0042995;GO:0043226;GO:0043227;GO:0043228;GO:0043229;GO:0043230;GO:0043232;GO:0043234;GO:0044421;GO:0044422;GO:0044424;GO:0044430;GO:0044446;GO:0044464;GO:0065010;GO:0070062	ASFSQPLFQAVAAICR	16	2;3	1	ASFSQPLFQAVAAIC[125.0477]R	ASFSQPLFQAVAAIC[130.0791]R	C	NaN	-1.26498	1.03869	NaN	0.829961	0.712596	1.32961	NaN	NaN	NaN	NaN	0.740274	NaN	0.575299	NaN	NaN	0.75692	0.528067	1.02485	NaN	NaN	NaN	1.0826	0.32076	0.530895	NaN	0.188281	0.0346969	0.96589	0.481841	0.498271
	+	0.101462	1.65258	0.248821	P49368	T-complex protein 1 subunit gamma	CCT3	173	GO:0006457;GO:0006458;GO:0007339;GO:0008037;GO:0008152;GO:0009987;GO:0009988;GO:0016043;GO:0019538;GO:0022414;GO:0022607;GO:0035036;GO:0043170;GO:0044237;GO:0044238;GO:0044260;GO:0044267;GO:0046931;GO:0048610;GO:0051084;GO:0071840;GO:0071841;GO:0071842;GO:0071844	GO:0000166;GO:0005488;GO:0005515;GO:0005524;GO:0017076;GO:0030554;GO:0032553;GO:0032555;GO:0032559;GO:0035639;GO:0051082	GO:0005737;GO:0005829;GO:0005832;GO:0005856;GO:0005874;GO:0005886;GO:0016020;GO:0031982;GO:0031988;GO:0032991;GO:0043226;GO:0043227;GO:0043228;GO:0043229;GO:0043230;GO:0043232;GO:0043234;GO:0044297;GO:0044421;GO:0044422;GO:0044424;GO:0044430;GO:0044444;GO:0044445;GO:0044446;GO:0044464;GO:0065010;GO:0070062	WSSLACNIALDAVK	14	2	1	WSSLAC[125.0477]NIALDAVK	WSSLAC[130.0791]NIALDAVK	C	NaN	NaN	-0.489857	NaN	NaN	NaN	NaN	0.138142	NaN	NaN	NaN	NaN	-0.457174	-0.391551	-0.326467	-0.593759	0.430015	0.465485	0.284262	NaN	NaN	NaN	-0.0354113	NaN	0.583803	-0.439907	NaN	0.241665	NaN	NaN	NaN
	+	0.162828	1.35374	0.245593	P16157	Ankyrin-1	ANK1	1070	GO:0006605;GO:0006778;GO:0006779;GO:0006807;GO:0006810;GO:0006811;GO:0006812;GO:0006886;GO:0006887;GO:0006888;GO:0006935;GO:0006996;GO:0007010;GO:0007163;GO:0007165;GO:0007411;GO:0008152;GO:0009058;GO:0009605;GO:0009987;GO:0010638;GO:0015031;GO:0015672;GO:0016043;GO:0016192;GO:0018130;GO:0030011;GO:0032502;GO:0032940;GO:0033013;GO:0033014;GO:0033043;GO:0034641;GO:0035088;GO:0035090;GO:0040011;GO:…	GO:0005198;GO:0005200;GO:0005488;GO:0005515;GO:0008092;GO:0008093;GO:0019899;GO:0030507;GO:0030674;GO:0051117;GO:0060090	GO:0005634;GO:0005783;GO:0005829;GO:0005856;GO:0005886;GO:0014731;GO:0016020;GO:0016323;GO:0016529;GO:0030018;GO:0030673;GO:0030863;GO:0031253;GO:0031256;GO:0031430;GO:0032589;GO:0033267;GO:0042383;GO:0043226;GO:0043227;GO:0043228;GO:0043229;GO:0043231;GO:0043232;GO:0044422;GO:0044424;GO:0044425;GO:0044444;GO:0044448;GO:0044449;GO:0044456;GO:0044459;GO:0044463;GO:0044464;GO:0045211;GO:0097060	LCQDYDTIGPEGGSLK	16	2	1	LC[125.0477]QDYDTIGPEGGSLK	LC[130.0791]QDYDTIGPEGGSLK	C	0.906321	0.21767	0.369558	NaN	0.271984	0.790506	0.423324	0.844547	0.842987	0.197833	0.311776	NaN	NaN	NaN	0.643743	-1.10241	0.308531	NaN	0.351318	0.687394	-0.11934	NaN	-0.229831	0.42871	0.411058	NaN	0.225967	-0.397561	-0.0665578	-0.0222162	-0.601204
	+	0.0930976	1.71891	0.241467	P53582	Methionine aminopeptidase 1	METAP1	174	GO:0006417;GO:0006464;GO:0007155;GO:0007165;GO:0007166;GO:0007186;GO:0007602;GO:0007603;GO:0008152;GO:0008277;GO:0009314;GO:0009416;GO:0009581;GO:0009582;GO:0009583;GO:0009584;GO:0009605;GO:0009628;GO:0009889;GO:0009966;GO:0009987;GO:0010468;GO:0010556;GO:0010608;GO:0016056;GO:0016337;GO:0018193;GO:0018206;GO:0019222;GO:0019538;GO:0022400;GO:0022610;GO:0023051;GO:0031323;GO:0031326;GO:0031365;GO:…	GO:0003824;GO:0004177;GO:0005488;GO:0008233;GO:0008235;GO:0008237;GO:0008238;GO:0016787;GO:0043167;GO:0043169;GO:0046872;GO:0070006;GO:0070011	GO:0005634;GO:0005737;GO:0005829;GO:0005840;GO:0022626;GO:0030529;GO:0032991;GO:0043226;GO:0043227;GO:0043228;GO:0043229;GO:0043231;GO:0043232;GO:0044424;GO:0044444;GO:0044445;GO:0044464	EVLDVAAGMIKPGVTTEEIDHAVHLACIAR	30	3;4;5	1	EVLDVAAGMIKPGVTTEEIDHAVHLAC[125.0477]IAR	EVLDVAAGMIKPGVTTEEIDHAVHLAC[130.0791]IAR	C	NaN	NaN	NaN	NaN	NaN	NaN	NaN	NaN	NaN	NaN	NaN	NaN	-0.0178233	0.0694534	NaN	0.296988	0.64364	0.235451	NaN	NaN	NaN	NaN	-0.339048	NaN	NaN	0.220573	NaN	-0.253169	0.473129	NaN	-0.475201
	+	0.0922092	1.72552	0.241268	Q15417	Calponin-3	CNN3	59	GO:0006996;GO:0007010;GO:0009987;GO:0016043;GO:0030029;GO:0030036;GO:0030154;GO:0030855;GO:0031032;GO:0032502;GO:0048869;GO:0071840;GO:0071841;GO:0071842		GO:0005737;GO:0005856;GO:0005912;GO:0005924;GO:0005925;GO:0015629;GO:0030054;GO:0030055;GO:0043226;GO:0043228;GO:0043229;GO:0043232;GO:0044424;GO:0044464;GO:0070161	DGIILCELINK	11	2	1	DGIILC[125.0477]ELINK	DGIILC[130.0791]ELINK	C	0.133066	NaN	0.677052	NaN	-0.324487	1.31085	0.773883	0.0967325	NaN	0.344811	1.28317	0.203837	0.634227	0.19507	1.31255	-0.00517891	0.768436	0.122638	2.24831	NaN	NaN	0.145836	1.2034	-0.133716	-0.247647	0.0606687	2.13749	0.963055	-0.0780599	-0.273778	-0.108372
+	+	0.0112121	2.94211	0.240161	P02768	Serum albumin	ALB	58	GO:0001775;GO:0001894;GO:0001895;GO:0001897;GO:0001906;GO:0001907;GO:0002576;GO:0006082;GO:0006629;GO:0006810;GO:0006811;GO:0006820;GO:0006887;GO:0006897;GO:0006898;GO:0006950;GO:0007154;GO:0007584;GO:0007596;GO:0007599;GO:0007610;GO:0007622;GO:0007623;GO:0008152;GO:0008202;GO:0008206;GO:0009267;GO:0009605;GO:0009987;GO:0009991;GO:0010033;GO:0010035;GO:0010038;GO:0010324;GO:0010941;GO:0015711;GO:…	GO:0003676;GO:0003677;GO:0005488;GO:0005504;GO:0005507;GO:0005515;GO:0008144;GO:0008270;GO:0008289;GO:0015643;GO:0016209;GO:0019842;GO:0030170;GO:0031406;GO:0033293;GO:0043167;GO:0043169;GO:0046872;GO:0046914;GO:0048037;GO:0051087;GO:0070279	GO:0005576;GO:0005604;GO:0005615;GO:0005634;GO:0031093;GO:0031974;GO:0031982;GO:0031983;GO:0031988;GO:0032991;GO:0034774;GO:0043226;GO:0043227;GO:0043229;GO:0043230;GO:0043231;GO:0043233;GO:0043234;GO:0044420;GO:0044421;GO:0044422;GO:0044424;GO:0044433;GO:0044444;GO:0044446;GO:0044464;GO:0060205;GO:0065010;GO:0070062;GO:0072562	ALVLIAFAQYLQQCPFEDHVK	21	2;3;4	1	ALVLIAFAQYLQQC[125.0477]PFEDHVK	ALVLIAFAQYLQQC[130.0791]PFEDHVK	C	0.327947	-0.270454	0.534957	0.0318368	0.434588	0.120368	0.410037	0.503285	0.314313	0.225095	0.43203	0.0389913	-0.00828086	0.124488	0.360026	-0.249791	0.132763	-0.0437752	-0.0269096	0.301217	0.201106	0.25795	0.00241708	0.571753	0.498664	-0.151787	0.34445	0.382569	0.251465	-0.398608	0.399577
	+	0.120868	1.54593	0.239376	P62280	40S ribosomal protein S11	RPS11	131	GO:0000184;GO:0000956;GO:0006139;GO:0006401;GO:0006402;GO:0006412;GO:0006413;GO:0006414;GO:0006415;GO:0006605;GO:0006612;GO:0006613;GO:0006614;GO:0006807;GO:0006810;GO:0006886;GO:0008152;GO:0009056;GO:0009057;GO:0009058;GO:0009059;GO:0009987;GO:0010467;GO:0015031;GO:0016032;GO:0016043;GO:0016070;GO:0016071;GO:0019058;GO:0019083;GO:0019538;GO:0022411;GO:0022414;GO:0022415;GO:0032774;GO:0032984;GO:…	GO:0003676;GO:0003723;GO:0003735;GO:0005198;GO:0005488;GO:0019843	GO:0005730;GO:0005737;GO:0005829;GO:0005840;GO:0005912;GO:0005924;GO:0005925;GO:0015935;GO:0016020;GO:0022627;GO:0030054;GO:0030055;GO:0030529;GO:0031982;GO:0031988;GO:0032991;GO:0043226;GO:0043227;GO:0043228;GO:0043229;GO:0043230;GO:0043232;GO:0044421;GO:0044422;GO:0044424;GO:0044428;GO:0044444;GO:0044446;GO:0044464;GO:0065010;GO:0070062;GO:0070161	DVQIGDIVTVGECRPLSK	18	2;3	1	DVQIGDIVTVGEC[125.0477]RPLSK	DVQIGDIVTVGEC[130.0791]RPLSK	C	-0.57822	NaN	0.215777	NaN	0.336787	0.354965	0.963032	0.388468	NaN	-0.191085	0.104038	0.576942	0.376856	0.617894	0.689158	0.347866	1.4035	0.482083	2.25806	NaN	1.01195	0.276689	NaN	0.463624	-0.340564	-0.345906	-0.214997	NaN	0.523316	-0.0671051	NaN
+	+	0.0464874	2.12582	0.238488	P06703	Protein S100-A6	S100A6	3	GO:0007165;GO:0007409;GO:0008284;GO:0009653;GO:0009987;GO:0016043;GO:0030030;GO:0032502;GO:0032989;GO:0032990;GO:0042127;GO:0048145;GO:0048146;GO:0048518;GO:0048522;GO:0048812;GO:0048858;GO:0048869;GO:0050789;GO:0050794;GO:0050896;GO:0051716;GO:0065007;GO:0071840;GO:0071841;GO:0071842	GO:0005215;GO:0005488;GO:0005509;GO:0005515;GO:0005523;GO:0008092;GO:0008270;GO:0015075;GO:0022857;GO:0022891;GO:0022892;GO:0042802;GO:0042803;GO:0043167;GO:0043169;GO:0046872;GO:0046914;GO:0046983;GO:0048306	GO:0001726;GO:0005634;GO:0005635;GO:0005737;GO:0005829;GO:0019897;GO:0019898;GO:0031234;GO:0031967;GO:0031975;GO:0031982;GO:0031988;GO:0042995;GO:0043226;GO:0043227;GO:0043229;GO:0043230;GO:0043231;GO:0044421;GO:0044422;GO:0044424;GO:0044425;GO:0044428;GO:0044444;GO:0044446;GO:0044459;GO:0044464;GO:0048471;GO:0065010;GO:0070062	ACPLDQAIGLLVAIFHK	17	2;3	1	AC[125.0477]PLDQAIGLLVAIFHK	AC[130.0791]PLDQAIGLLVAIFHK	C	-0.147159	NaN	-0.262592	0.444685	0.117435	-0.530767	-0.132701	0.0902756	0.287022	-0.173278	-0.0799017	NaN	NaN	-1.08546	-0.716398	-0.587667	-0.309379	-0.684519	NaN	NaN	-0.130819	-0.014584	-0.098548	0.423147	-0.926237	-0.617211	-0.0650951	-0.252868	-0.582587	NaN	NaN
	+	0.170055	1.32501	0.236991	Q12805	EGF-containing fibulin-like extracellular matrix protein 1	EFEMP1	365	GO:0003008;GO:0006355;GO:0006464;GO:0006468;GO:0006793;GO:0006796;GO:0007165;GO:0007166;GO:0007167;GO:0007169;GO:0007173;GO:0007600;GO:0007601;GO:0008152;GO:0009889;GO:0009987;GO:0010468;GO:0010556;GO:0016043;GO:0016310;GO:0018108;GO:0018193;GO:0018212;GO:0019219;GO:0019222;GO:0019538;GO:0030198;GO:0031323;GO:0031326;GO:0032330;GO:0032331;GO:0032501;GO:0043062;GO:0043170;GO:0043412;GO:0044237;GO:…	GO:0003824;GO:0004672;GO:0004713;GO:0004714;GO:0004871;GO:0004872;GO:0004888;GO:0005006;GO:0005102;GO:0005154;GO:0005488;GO:0005509;GO:0005515;GO:0016301;GO:0016740;GO:0016772;GO:0016773;GO:0019199;GO:0038023;GO:0043167;GO:0043169;GO:0046872;GO:0060089;GO:0070851	GO:0005576;GO:0005578;GO:0005615;GO:0031012;GO:0031982;GO:0031988;GO:0043226;GO:0043227;GO:0043230;GO:0044421;GO:0065010;GO:0070062	NPCQDPYILTPENR	14	2	1	NPC[125.0477]QDPYILTPENR	NPC[130.0791]QDPYILTPENR	C	-2.70125	-3.28738	-2.51974	NaN	-2.10699	-1.99776	-3.94021	-2.82774	-1.8755	-3.47563	-2.41674	NaN	NaN	-4.21236	-2.47932	-2.28764	NaN	NaN	-2.17177	-2.45908	-2.36762	-2.59006	-2.9571	-3.37617	-3.36409	-2.63327	-2.75932	-1.94712	-2.31571	-2.83945	-2.35718
+	+	0.0429735	2.17708	0.236961	Q96QK1	Vacuolar protein sorting-associated protein 35	VPS35	361	GO:0006810;GO:0006886;GO:0009987;GO:0015031;GO:0016192;GO:0016197;GO:0042147;GO:0045056;GO:0045184;GO:0046907;GO:0051234;GO:0051649	GO:0005215;GO:0008565;GO:0022892	GO:0005765;GO:0005768;GO:0005769;GO:0005770;GO:0005774;GO:0005829;GO:0016020;GO:0030904;GO:0031090;GO:0031982;GO:0031988;GO:0032991;GO:0043226;GO:0043227;GO:0043229;GO:0043230;GO:0043231;GO:0043234;GO:0044421;GO:0044422;GO:0044424;GO:0044425;GO:0044437;GO:0044444;GO:0044446;GO:0044464;GO:0065010;GO:0070062	CYPDRVDYVDK	11	2	1	C[125.0477]YPDRVDYVDK	C[130.0791]YPDRVDYVDK	C	2.26036	NaN	2.37613	NaN	2.46317	NaN	2.44752	2.07331	NaN	2.4509	2.24997	1.43565	1.90626	1.73948	2.18812	2.23386	1.93981	2.59393	2.45774	NaN	1.7437	NaN	2.48918	NaN	2.43286	2.03613	2.74582	1.20502	2.91242	NaN	2.31647
	+	0.051381	2.0637	0.236951	O00244	Copper transport protein ATOX1	ATOX1	41	GO:0000041;GO:0000302;GO:0006810;GO:0006811;GO:0006812;GO:0006825;GO:0006873;GO:0006878;GO:0006950;GO:0006979;GO:0009987;GO:0010035;GO:0015680;GO:0019725;GO:0030001;GO:0030003;GO:0042221;GO:0042592;GO:0046907;GO:0048878;GO:0050801;GO:0050896;GO:0051234;GO:0051649;GO:0055070;GO:0055080;GO:0055082;GO:0065007;GO:0065008	GO:0005215;GO:0005375;GO:0005488;GO:0005507;GO:0005515;GO:0008324;GO:0015075;GO:0016530;GO:0016531;GO:0022857;GO:0022890;GO:0022891;GO:0022892;GO:0032767;GO:0043167;GO:0043169;GO:0046872;GO:0046873;GO:0046914;GO:0046915	GO:0005829;GO:0044424;GO:0044444;GO:0044464	VCIESEHSMDTLLATLK	17	2;3	1	VC[125.0477]IESEHSMDTLLATLK	VC[130.0791]IESEHSMDTLLATLK	C	0.612187	NaN	0.638103	0.261399	1.46551	0.702962	-0.381717	0.495381	1.43916	0.186764	0.873176	0.373083	0.508488	-0.0394496	NaN	0.259532	1.09666	0.222135	NaN	NaN	0.0123395	0.668618	-0.0854914	0.762379	0.386836	0.0837056	-0.071906	0.0153737	0.857966	-0.0306828	1.72868
+	+	0.0430357	2.18091	0.235798	O43707	Alpha-actinin-4	ACTN4	793	GO:0001666;GO:0001775;GO:0002028;GO:0002576;GO:0006810;GO:0006887;GO:0006950;GO:0006996;GO:0007010;GO:0007015;GO:0007043;GO:0007165;GO:0007596;GO:0007599;GO:0009987;GO:0010155;GO:0010941;GO:0010959;GO:0015031;GO:0016043;GO:0016192;GO:0022607;GO:0022898;GO:0030029;GO:0030036;GO:0030100;GO:0030168;GO:0030522;GO:0032409;GO:0032411;GO:0032412;GO:0032414;GO:0032415;GO:0032417;GO:0032501;GO:0032879;GO:…	GO:0000988;GO:0000989;GO:0001882;GO:0003712;GO:0003713;GO:0003779;GO:0005102;GO:0005178;GO:0005488;GO:0005509;GO:0005515;GO:0008092;GO:0008134;GO:0030374;GO:0032403;GO:0035257;GO:0042802;GO:0042803;GO:0042974;GO:0043167;GO:0043169;GO:0046872;GO:0046983;GO:0051015;GO:0051427	GO:0001725;GO:0005576;GO:0005615;GO:0005634;GO:0005737;GO:0005856;GO:0005911;GO:0005912;GO:0005924;GO:0005925;GO:0030018;GO:0030054;GO:0030055;GO:0030529;GO:0030863;GO:0031093;GO:0031143;GO:0031974;GO:0031982;GO:0031983;GO:0031988;GO:0032432;GO:0032991;GO:0034774;GO:0042641;GO:0042995;GO:0043005;GO:0043226;GO:0043227;GO:0043228;GO:0043229;GO:0043230;GO:0043231;GO:0043232;GO:0043233;GO:0043234;GO:…	ACLISLGYDVENDR	14	2	1	AC[125.0477]LISLGYDVENDR	AC[130.0791]LISLGYDVENDR	C	-0.0992869	-0.0433731	0.00497118	0.187099	0.0672866	-0.130038	0.0163622	-0.0382025	0.172579	0.312999	0.00700365	-0.338713	-1.21358	-1.35543	-0.0457534	-0.082599	0.0865493	-1.10577	0.0728053	NaN	-0.0357423	-0.267189	0.56628	0.0357423	-0.149886	-1.49748	-0.212612	1.98624	-0.172608	-0.0843722	-0.246509
	+	0.0979703	1.6861	0.23162	P46782	40S ribosomal protein S5	RPS5	172	GO:0000184;GO:0000956;GO:0006139;GO:0006401;GO:0006402;GO:0006412;GO:0006413;GO:0006414;GO:0006415;GO:0006417;GO:0006448;GO:0006450;GO:0006605;GO:0006612;GO:0006613;GO:0006614;GO:0006807;GO:0006810;GO:0006886;GO:0008152;GO:0009056;GO:0009057;GO:0009058;GO:0009059;GO:0009889;GO:0009987;GO:0010467;GO:0010468;GO:0010556;GO:0010608;GO:0015031;GO:0016032;GO:0016043;GO:0016070;GO:0016071;GO:0019058;GO:…	GO:0003676;GO:0003723;GO:0003729;GO:0003735;GO:0005198;GO:0005488	GO:0005829;GO:0005912;GO:0005924;GO:0005925;GO:0015935;GO:0016020;GO:0022627;GO:0030054;GO:0030055;GO:0030529;GO:0031982;GO:0031988;GO:0032991;GO:0043226;GO:0043227;GO:0043230;GO:0044421;GO:0044422;GO:0044424;GO:0044444;GO:0044446;GO:0044464;GO:0065010;GO:0070062;GO:0070161	TIAECLADELINAAK	15	2	1	TIAEC[125.0477]LADELINAAK	TIAEC[130.0791]LADELINAAK	C	0.187123	-1.5957	1.27542	0.00118516	1.16971	0.708523	0.931852	0.666629	0.670333	0.696606	0.994156	0.267757	0.949245	0.782717	0.565935	0.382057	0.734732	1.16797	0.938218	-1.08162	1.64505	0.697188	0.630274	0.512343	0.207244	1.0845	0.415183	0.851784	0.748198	0.648472	0.0853329
	+	0.125008	1.5221	0.227638	P55196	Afadin	AFDN	324	GO:0006140;GO:0007154;GO:0007155;GO:0007165;GO:0007267;GO:0009894;GO:0009987;GO:0016043;GO:0019219;GO:0019222;GO:0022607;GO:0022610;GO:0023052;GO:0030811;GO:0031323;GO:0031329;GO:0033121;GO:0033124;GO:0034329;GO:0034330;GO:0034332;GO:0043085;GO:0043087;GO:0043547;GO:0044093;GO:0045216;GO:0050789;GO:0050790;GO:0050794;GO:0050896;GO:0051171;GO:0051336;GO:0051345;GO:0051716;GO:0065007;GO:0065009;GO:…	GO:0005488;GO:0005515;GO:0008022;GO:0017016;GO:0019899;GO:0031267;GO:0051020	GO:0005654;GO:0005737;GO:0005829;GO:0005886;GO:0005911;GO:0005912;GO:0005913;GO:0016020;GO:0030054;GO:0044422;GO:0044424;GO:0044428;GO:0044444;GO:0044446;GO:0044464;GO:0045177;GO:0070161	EIILDDDECPLQIFR	15	2	1	EIILDDDEC[125.0477]PLQIFR	EIILDDDEC[130.0791]PLQIFR	C	0.576932	NaN	0.870528	NaN	NaN	NaN	NaN	NaN	NaN	NaN	NaN	NaN	NaN	NaN	0.70401	0.289979	0.983358	0.402428	0.496778	NaN	NaN	NaN	-0.5063	NaN	0.689017	-0.0334368	NaN	NaN	0.463124	NaN	-0.0639893
	+	0.165506	1.3419	0.227598	P67775	Serine/threonine-protein phosphatase 2A catalytic subunit alpha isoform	PPP2CA	20	GO:0000184;GO:0000188;GO:0000278;GO:0000956;GO:0001558;GO:0001932;GO:0001933;GO:0006139;GO:0006275;GO:0006355;GO:0006396;GO:0006401;GO:0006402;GO:0006461;GO:0006464;GO:0006469;GO:0006470;GO:0006629;GO:0006643;GO:0006665;GO:0006672;GO:0006793;GO:0006796;GO:0006807;GO:0006915;GO:0006998;GO:0007049;GO:0007084;GO:0007165;GO:0007166;GO:0007167;GO:0007169;GO:0007498;GO:0008152;GO:0008219;GO:0008380;GO:…	GO:0003824;GO:0004721;GO:0004722;GO:0005488;GO:0016787;GO:0016788;GO:0016791;GO:0042578;GO:0043167;GO:0043169;GO:0046872	GO:0000159;GO:0000775;GO:0000922;GO:0005634;GO:0005739;GO:0005829;GO:0005856;GO:0005886;GO:0008287;GO:0015630;GO:0016020;GO:0031982;GO:0031988;GO:0032991;GO:0043226;GO:0043227;GO:0043228;GO:0043229;GO:0043230;GO:0043231;GO:0043232;GO:0043234;GO:0044421;GO:0044422;GO:0044424;GO:0044427;GO:0044430;GO:0044444;GO:0044446;GO:0044464;GO:0065010;GO:0070062	ELDQWIEQLNECK	13	2	1	ELDQWIEQLNEC[125.0477]K	ELDQWIEQLNEC[130.0791]K	C	-0.169346	NaN	0.494119	0.538712	0.65472	0.393497	NaN	0.207721	NaN	-0.040574	0.486777	NaN	1.15669	0.360189	1.08116	0.0338743	0.421417	0.708911	0.924189	NaN	NaN	1.38386	NaN	1.23062	-0.201786	0.424936	0.930584	NaN	-0.0273315	0.511178	0.591352
	+	0.139174	1.44531	0.221872	Q15365	Poly(rC)-binding protein 1	PCBP1	163	GO:0000375;GO:0000377;GO:0000398;GO:0006139;GO:0006396;GO:0006397;GO:0006807;GO:0008152;GO:0008380;GO:0009987;GO:0010467;GO:0016070;GO:0016071;GO:0034641;GO:0043170;GO:0044237;GO:0044238;GO:0044260;GO:0090304	GO:0003676;GO:0003677;GO:0003697;GO:0003723;GO:0005488;GO:0043566	GO:0005654;GO:0005737;GO:0016020;GO:0030529;GO:0031982;GO:0031988;GO:0032991;GO:0043226;GO:0043227;GO:0043229;GO:0043230;GO:0043231;GO:0044421;GO:0044422;GO:0044424;GO:0044428;GO:0044446;GO:0044464;GO:0065010;GO:0070062	QICLVMLETLSQSPQGR	17	2;3	1	QIC[125.0477]LVMLETLSQSPQGR	QIC[130.0791]LVMLETLSQSPQGR	C	-0.483207	NaN	-1.09572	-0.563562	-0.461181	-0.734024	-0.0806188	-2.085	NaN	-0.0671714	0.0780734	-0.879485	-0.61399	0.496876	-0.339824	-0.594643	0.00851274	-0.850169	-0.48715	NaN	NaN	-0.726328	NaN	-0.536609	-0.717627	-0.716656	2.28148	-0.431386	0.0578738	-1.56679	-1.39198
+	+	0.00147692	3.94293	0.221172	P00450	Ceruloplasmin	CP	338	GO:0000041;GO:0006810;GO:0006811;GO:0006812;GO:0006825;GO:0006873;GO:0006875;GO:0006879;GO:0009987;GO:0019725;GO:0030001;GO:0030003;GO:0042592;GO:0048878;GO:0050801;GO:0051234;GO:0055065;GO:0055072;GO:0055080;GO:0055082;GO:0055085;GO:0065007;GO:0065008	GO:0003824;GO:0004322;GO:0005488;GO:0005507;GO:0005515;GO:0016491;GO:0016722;GO:0016724;GO:0043167;GO:0043169;GO:0046872;GO:0046914;GO:0051087	GO:0005576;GO:0005615;GO:0005765;GO:0005774;GO:0016020;GO:0031090;GO:0031982;GO:0031988;GO:0043226;GO:0043227;GO:0043230;GO:0044421;GO:0044422;GO:0044424;GO:0044437;GO:0044444;GO:0044446;GO:0044464;GO:0065010;GO:0070062;GO:0072562	IDTINLFPATLFDAYMVAQNPGEWMLSCQNLNHLK	35	3;4	1	IDTINLFPATLFDAYMVAQNPGEWMLSC[125.0477]QNLNHLK	IDTINLFPATLFDAYMVAQNPGEWMLSC[130.0791]QNLNHLK	C	-0.464172	-0.234348	-0.481375	NaN	-0.452263	-0.599598	-0.359606	-0.424448	NaN	-0.544469	-0.263599	NaN	NaN	NaN	-0.0912904	NaN	0.180345	-0.0639689	-0.221115	-0.321403	NaN	NaN	-0.111889	NaN	NaN	NaN	-0.378242	0.00970819	-0.373816	-0.311009	0.143609
	+	0.101497	1.65592	0.217382	P61586	Transforming protein RhoA	RHOA	159	GO:0000226;GO:0001503;GO:0001775;GO:0006928;GO:0006935;GO:0006996;GO:0007010;GO:0007017;GO:0007043;GO:0007051;GO:0007052;GO:0007165;GO:0007166;GO:0007167;GO:0007169;GO:0007178;GO:0007179;GO:0007264;GO:0007265;GO:0007266;GO:0007411;GO:0007596;GO:0007599;GO:0008152;GO:0009605;GO:0009653;GO:0009966;GO:0009967;GO:0009987;GO:0010033;GO:0010627;GO:0010638;GO:0010646;GO:0010647;GO:0010720;GO:0010721;GO:…	GO:0000166;GO:0003824;GO:0003924;GO:0005488;GO:0005515;GO:0005525;GO:0008092;GO:0016462;GO:0016787;GO:0016817;GO:0016818;GO:0017022;GO:0017076;GO:0017111;GO:0019001;GO:0032553;GO:0032555;GO:0032561;GO:0035639	GO:0005768;GO:0005789;GO:0005829;GO:0005856;GO:0005886;GO:0005911;GO:0005912;GO:0005924;GO:0005925;GO:0005938;GO:0016020;GO:0030027;GO:0030054;GO:0030055;GO:0030496;GO:0031090;GO:0031982;GO:0031988;GO:0032154;GO:0032155;GO:0042995;GO:0043226;GO:0043227;GO:0043228;GO:0043229;GO:0043230;GO:0043231;GO:0043232;GO:0043296;GO:0044421;GO:0044422;GO:0044424;GO:0044425;GO:0044432;GO:0044444;GO:0044446;GO:…	IGAFGYMECSAK	12	2	1	IGAFGYMEC[125.0477]SAK	IGAFGYMEC[130.0791]SAK	C	-0.629514	NaN	-0.460043	NaN	-0.346105	-0.192986	-1.10554	-1.1057	-0.478957	-0.404057	-0.629896	-0.865446	-0.316304	-0.889247	-0.685201	-0.500752	-0.607382	-1.60907	-0.988552	-1.27079	NaN	-0.551025	-0.806147	-0.976082	-0.804554	-1.29007	-0.69363	-1.06653	-0.753905	-1.33469	-1.12991
	+	0.101719	1.6562	0.21646	P36871	Phosphoglucomutase-1	PGM1	374	GO:0000271;GO:0000272;GO:0005975;GO:0005976;GO:0005977;GO:0005978;GO:0005980;GO:0005996;GO:0006006;GO:0006007;GO:0006012;GO:0006066;GO:0006073;GO:0006091;GO:0006094;GO:0006096;GO:0006112;GO:0008152;GO:0009056;GO:0009057;GO:0009058;GO:0009059;GO:0009250;GO:0009251;GO:0009987;GO:0015980;GO:0016051;GO:0016052;GO:0019318;GO:0019319;GO:0019320;GO:0019388;GO:0033692;GO:0034637;GO:0034645;GO:0043170;GO:…	GO:0000287;GO:0003824;GO:0004614;GO:0005488;GO:0016853;GO:0016866;GO:0016868;GO:0043167;GO:0043169;GO:0046872	GO:0005737;GO:0005829;GO:0005856;GO:0015629;GO:0031982;GO:0031988;GO:0043226;GO:0043227;GO:0043228;GO:0043229;GO:0043230;GO:0043232;GO:0044421;GO:0044424;GO:0044444;GO:0044464;GO:0065010;GO:0070062	LSLCGEESFGTGSDHIR	17	2;3	1	LSLC[125.0477]GEESFGTGSDHIR	LSLC[130.0791]GEESFGTGSDHIR	C	0.0648261	NaN	0.774715	NaN	0.951363	0.777967	2.32253	NaN	0.587958	0.694193	0.719864	0.472234	0.804471	0.994858	0.698022	0.520883	0.574324	0.112734	0.963273	NaN	0.535052	0.869602	0.801562	0.723514	1.22691	NaN	0.631034	0.12103	0.315637	NaN	0.531738
+	+	0.0372941	2.28456	0.209473	P08574	Cytochrome c1, heme protein, mitochondrial	CYC1	219	GO:0006091;GO:0008152;GO:0009719;GO:0009725;GO:0009987;GO:0010033;GO:0022900;GO:0022904;GO:0033762;GO:0042221;GO:0043434;GO:0044237;GO:0044281;GO:0050896;GO:0055114	GO:0005488;GO:0005506;GO:0009055;GO:0020037;GO:0043167;GO:0043169;GO:0045155;GO:0046872;GO:0046906;GO:0046914	GO:0005634;GO:0005739;GO:0005743;GO:0016020;GO:0016021;GO:0019866;GO:0031090;GO:0031224;GO:0031966;GO:0043226;GO:0043227;GO:0043229;GO:0043231;GO:0044422;GO:0044424;GO:0044425;GO:0044429;GO:0044444;GO:0044446;GO:0044464;GO:0070469	HGGEDYVFSLLTGYCEPPTGVSLR	24	3	1	HGGEDYVFSLLTGYC[125.0477]EPPTGVSLR	HGGEDYVFSLLTGYC[130.0791]EPPTGVSLR	C	1.19072	-1.82671	1.37338	1.4531	2.38553	1.25844	1.65334	1.24032	1.73475	1.01841	1.40375	NaN	NaN	1.23637	1.4821	1.51778	1.49047	1.52104	1.80882	-0.581237	NaN	1.36753	1.29601	1.30926	1.3713	1.50317	1.45277	1.24957	1.69129	1.01449	1.3323
+	+	0.0366169	2.29964	0.207387	Q15019	Septin-2	SEPTIN2	111	GO:0000280;GO:0002036;GO:0006996;GO:0007067;GO:0007165;GO:0007166;GO:0007224;GO:0009987;GO:0010927;GO:0016043;GO:0022402;GO:0022403;GO:0022607;GO:0030030;GO:0030031;GO:0031175;GO:0032502;GO:0032879;GO:0032880;GO:0032890;GO:0042384;GO:0043269;GO:0044070;GO:0048285;GO:0048646;GO:0050789;GO:0050794;GO:0050896;GO:0051049;GO:0051301;GO:0051716;GO:0051952;GO:0051955;GO:0065007;GO:0071840;GO:0071841;GO:…	GO:0000166;GO:0005488;GO:0005525;GO:0017076;GO:0019001;GO:0030234;GO:0032553;GO:0032555;GO:0032561;GO:0035639	GO:0000145;GO:0000776;GO:0000777;GO:0005634;GO:0005654;GO:0005730;GO:0005737;GO:0005819;GO:0005856;GO:0015629;GO:0030496;GO:0031253;GO:0031982;GO:0031988;GO:0032154;GO:0032155;GO:0032991;GO:0035869;GO:0043226;GO:0043227;GO:0043228;GO:0043229;GO:0043230;GO:0043231;GO:0043232;GO:0043234;GO:0044421;GO:0044422;GO:0044424;GO:0044425;GO:0044427;GO:0044428;GO:0044430;GO:0044441;GO:0044444;GO:0044446;GO:…	LTVVDTPGYGDAINCR	16	2	1	LTVVDTPGYGDAINC[125.0477]R	LTVVDTPGYGDAINC[130.0791]R	C	0.785679	-2.0062	0.931237	1.5161	0.932042	0.592535	0.768263	1.20971	0.653313	-0.186963	1.04275	0.774255	0.113798	0.952744	2.50213	0.680307	0.992589	0.880646	0.843313	0.0456339	NaN	0.868279	0.74699	0.74207	0.983752	1.06078	0.747434	0.391831	0.770962	0.699276	0.860941
	+	0.0666619	1.91723	0.20387	Q96PD5	N-acetylmuramoyl-L-alanine amidase	PGLYRP2	530	GO:0000270;GO:0000272;GO:0001519;GO:0001817;GO:0001818;GO:0002218;GO:0002221;GO:0002253;GO:0002376;GO:0002682;GO:0002683;GO:0002684;GO:0002694;GO:0002695;GO:0002697;GO:0002698;GO:0002757;GO:0002758;GO:0002764;GO:0005975;GO:0005976;GO:0006022;GO:0006026;GO:0006027;GO:0006518;GO:0006807;GO:0006950;GO:0006952;GO:0006955;GO:0007165;GO:0008152;GO:0009056;GO:0009057;GO:0009253;GO:0009308;GO:0009581;GO:…	GO:0001871;GO:0003824;GO:0004871;GO:0004872;GO:0005488;GO:0005539;GO:0008270;GO:0008329;GO:0008745;GO:0016019;GO:0016787;GO:0016810;GO:0016811;GO:0030246;GO:0030247;GO:0038023;GO:0042834;GO:0043167;GO:0043169;GO:0046872;GO:0046914;GO:0060089	GO:0005622;GO:0016020;GO:0031982;GO:0031988;GO:0043226;GO:0043227;GO:0043230;GO:0044421;GO:0044464;GO:0065010;GO:0070062	TDCPGDALFDLLR	13	2	1	TDC[125.0477]PGDALFDLLR	TDC[130.0791]PGDALFDLLR	C	-0.346349	-2.00898	-0.243283	NaN	0.0376133	-0.302942	-0.0983881	NaN	0.126304	-0.301329	-0.100717	-0.0431187	-0.203309	-0.619081	0.0113842	0.101769	-0.232778	NaN	-0.150568	-0.879515	-0.0179688	NaN	-0.0822883	-0.0559125	0.265298	NaN	-0.369467	-0.823934	-0.35054	-0.248374	0.531464
	+	0.158152	1.36819	0.202904	Q01459	Di-N-acetylchitobiase	CTBS	358	GO:0000272;GO:0005975;GO:0005976;GO:0006022;GO:0006026;GO:0006030;GO:0006032;GO:0006807;GO:0008152;GO:0009056;GO:0009057;GO:0009308;GO:0009311;GO:0009313;GO:0016052;GO:0043170;GO:0044238	GO:0001871;GO:0003824;GO:0004553;GO:0004568;GO:0005488;GO:0008061;GO:0016787;GO:0016798;GO:0030246;GO:0030247	GO:0000323;GO:0005615;GO:0005764;GO:0005773;GO:0031982;GO:0031988;GO:0043226;GO:0043227;GO:0043229;GO:0043230;GO:0043231;GO:0044421;GO:0044424;GO:0044444;GO:0044464;GO:0065010;GO:0070062	GIGMWNANCLDYSGDAVAK	19	2	1	GIGMWNANC[125.0477]LDYSGDAVAK	GIGMWNANC[130.0791]LDYSGDAVAK	C	0.397323	NaN	0.355914	0.498783	0.899934	0.714639	0.143434	0.643867	1.30516	0.275662	0.444128	-0.410043	0.0912194	NaN	1.22205	NaN	0.999013	0.421467	1.05257	NaN	NaN	0.68354	0.562657	NaN	0.241639	NaN	0.281554	0.306513	0.210667	1.13951	0.620061
+	+	0.0296754	2.40894	0.200793	P51911	Calponin-1	CNN1	61	GO:0006937;GO:0006940;GO:0006996;GO:0007010;GO:0009987;GO:0016043;GO:0030029;GO:0030036;GO:0031032;GO:0044057;GO:0050789;GO:0051239;GO:0065007;GO:0071840;GO:0071841;GO:0071842;GO:0090257		GO:0005856;GO:0005912;GO:0005924;GO:0005925;GO:0030054;GO:0030055;GO:0043226;GO:0043228;GO:0043229;GO:0043232;GO:0044424;GO:0044464;GO:0070161	DGIILCEFINK	11	2	1	DGIILC[125.0477]EFINK	DGIILC[130.0791]EFINK	C	NaN	NaN	-0.0860124	NaN	-0.71338	NaN	-0.183121	NaN	0.268301	NaN	-0.173095	NaN	NaN	NaN	0.27696	-0.309544	-0.139538	NaN	-0.245699	NaN	NaN	NaN	-0.223304	NaN	-0.193138	NaN	NaN	NaN	-0.490755	-0.324808	-0.256658
	+	0.0991268	1.67874	0.200352	P21810	Biglycan	BGN	187	GO:0000271;GO:0000272;GO:0001974;GO:0005975;GO:0005976;GO:0006022;GO:0006023;GO:0006024;GO:0006026;GO:0006027;GO:0006464;GO:0006790;GO:0006807;GO:0008152;GO:0009056;GO:0009057;GO:0009058;GO:0009059;GO:0009308;GO:0009987;GO:0016043;GO:0016051;GO:0016052;GO:0018149;GO:0018193;GO:0018209;GO:0019538;GO:0019800;GO:0030198;GO:0030203;GO:0030204;GO:0030205;GO:0030206;GO:0030207;GO:0030208;GO:0032501;GO:…	GO:0001871;GO:0005198;GO:0005201;GO:0005488;GO:0005539;GO:0030246;GO:0030247;GO:0050840	GO:0005576;GO:0005578;GO:0005775;GO:0005796;GO:0005886;GO:0009986;GO:0016020;GO:0016023;GO:0030133;GO:0031012;GO:0031410;GO:0031974;GO:0031982;GO:0031988;GO:0042383;GO:0043202;GO:0043226;GO:0043227;GO:0043229;GO:0043230;GO:0043231;GO:0043233;GO:0044421;GO:0044422;GO:0044424;GO:0044431;GO:0044437;GO:0044444;GO:0044446;GO:0044464;GO:0065010;GO:0070013;GO:0070062	NMNCIEMGGNPLENSGFEPGAFDGLK	26	3	1	NMNC[125.0477]IEMGGNPLENSGFEPGAFDGLK	NMNC[130.0791]IEMGGNPLENSGFEPGAFDGLK	C	0.306548	NaN	0.204236	NaN	0.244514	NaN	0.42927	NaN	NaN	0.742676	0.342168	NaN	NaN	0.234248	-0.155805	-0.252851	0.468943	NaN	0.217618	NaN	NaN	0.478018	0.846893	0.459997	0.275379	NaN	0.405489	NaN	0.233367	NaN	0.466681
	+	0.0869241	1.76034	0.197372	P31146	Coronin-1A	CORO1A	285	GO:0001775;GO:0001776;GO:0001845;GO:0001894;GO:0002252;GO:0002260;GO:0002263;GO:0002285;GO:0002323;GO:0002366;GO:0002376;GO:0002682;GO:0002684;GO:0002694;GO:0002696;GO:0006810;GO:0006811;GO:0006812;GO:0006816;GO:0006887;GO:0006897;GO:0006906;GO:0006909;GO:0006928;GO:0006935;GO:0006944;GO:0006950;GO:0006952;GO:0006955;GO:0006996;GO:0007010;GO:0007015;GO:0007155;GO:0008064;GO:0008284;GO:0008360;GO:…	GO:0003779;GO:0003785;GO:0005488;GO:0005515;GO:0008022;GO:0008092;GO:0017022;GO:0019899;GO:0019900;GO:0032036;GO:0042802;GO:0042803;GO:0043548;GO:0046983;GO:0051015	GO:0001772;GO:0001891;GO:0005737;GO:0005768;GO:0005769;GO:0005856;GO:0005884;GO:0005886;GO:0005911;GO:0012506;GO:0016020;GO:0016023;GO:0030027;GO:0030054;GO:0030139;GO:0030424;GO:0030659;GO:0030666;GO:0030670;GO:0030863;GO:0030864;GO:0031090;GO:0031410;GO:0031982;GO:0031988;GO:0032991;GO:0042995;GO:0043005;GO:0043226;GO:0043227;GO:0043228;GO:0043229;GO:0043230;GO:0043231;GO:0043232;GO:0043234;GO:…	HLEEPLSLQELDTSSGVLLPFFDPDTNIVYLCGK	34	3	1	HLEEPLSLQELDTSSGVLLPFFDPDTNIVYLC[125.0477]GK	HLEEPLSLQELDTSSGVLLPFFDPDTNIVYLC[130.0791]GK	C	0.783221	NaN	0.257737	0.514046	0.469164	0.215424	0.389535	0.262237	NaN	0.619355	0.25812	NaN	0.11175	0.0758948	0.29988	0.233488	0.511583	0.214931	0.310258	NaN	NaN	0.101337	NaN	0.520641	0.457333	0.287267	-0.0609408	0.0666871	0.670494	0.462922	1.06636
	+	0.091053	1.73654	0.196572	P40939	Trifunctional enzyme subunit alpha, mitochondrial	HADHA	470	GO:0006082;GO:0006629;GO:0006631;GO:0006635;GO:0006644;GO:0006650;GO:0008152;GO:0008610;GO:0008654;GO:0009056;GO:0009058;GO:0009062;GO:0009719;GO:0009725;GO:0009987;GO:0010033;GO:0016042;GO:0016054;GO:0019395;GO:0019637;GO:0019752;GO:0030258;GO:0032048;GO:0032787;GO:0032868;GO:0034440;GO:0035965;GO:0042180;GO:0042221;GO:0042493;GO:0043434;GO:0043436;GO:0044237;GO:0044238;GO:0044242;GO:0044248;GO:…	GO:0000062;GO:0000166;GO:0003824;GO:0003857;GO:0003985;GO:0003988;GO:0004300;GO:0005488;GO:0005504;GO:0008289;GO:0016407;GO:0016408;GO:0016453;GO:0016491;GO:0016508;GO:0016509;GO:0016614;GO:0016616;GO:0016740;GO:0016746;GO:0016747;GO:0016829;GO:0016835;GO:0016836;GO:0031406;GO:0033293;GO:0048037;GO:0050662;GO:0051287	GO:0005739;GO:0005743;GO:0009295;GO:0016020;GO:0016507;GO:0019866;GO:0031090;GO:0031966;GO:0032991;GO:0042645;GO:0043226;GO:0043227;GO:0043228;GO:0043229;GO:0043231;GO:0043232;GO:0043234;GO:0044422;GO:0044424;GO:0044429;GO:0044444;GO:0044446;GO:0044464	EVEAVIPDHCIFASNTSALPISEIAAVSK	29	3	1	EVEAVIPDHC[125.0477]IFASNTSALPISEIAAVSK	EVEAVIPDHC[130.0791]IFASNTSALPISEIAAVSK	C	NaN	NaN	NaN	NaN	NaN	NaN	NaN	NaN	NaN	NaN	NaN	NaN	0.298646	0.354079	NaN	0.389724	0.558722	0.262876	NaN	NaN	NaN	NaN	0.399934	0.305687	0.508819	0.407487	NaN	NaN	NaN	0.185112	0.249174
	+	0.0581985	2.00205	0.195376	P13489	Ribonuclease inhibitor	RNH1	362	GO:0006139;GO:0006401;GO:0006402;GO:0006807;GO:0008152;GO:0009056;GO:0009057;GO:0009987;GO:0016070;GO:0016071;GO:0019222;GO:0022603;GO:0034641;GO:0043086;GO:0043170;GO:0044092;GO:0044237;GO:0044238;GO:0044248;GO:0044260;GO:0044265;GO:0045765;GO:0050789;GO:0050790;GO:0050793;GO:0051239;GO:0065007;GO:0065009;GO:0090304;GO:2000026	GO:0004857;GO:0008428;GO:0030234	GO:0005737;GO:0031982;GO:0031988;GO:0032311;GO:0032991;GO:0043226;GO:0043227;GO:0043230;GO:0043234;GO:0044421;GO:0044424;GO:0044464;GO:0065010;GO:0070062	ELCQGLGQPGSVLR	14	2	1	ELC[125.0477]QGLGQPGSVLR	ELC[130.0791]QGLGQPGSVLR	C	-0.368158	-0.020143	-0.662291	-0.682998	-0.0737439	-0.658537	-0.227119	-0.29859	0.148613	-0.822232	-0.187985	-0.457515	-0.148005	-0.283387	0.401866	-0.369275	1.14776	0.376666	0.258233	0.542064	0.802169	-0.363019	-0.100546	0.624624	0.161564	-1.18287	0.712521	-0.473116	-0.128071	0.0286283	0.102963
	+	0.162667	1.35333	0.194877	P61586	Transforming protein RhoA	RHOA	20	GO:0000226;GO:0001503;GO:0001775;GO:0006928;GO:0006935;GO:0006996;GO:0007010;GO:0007017;GO:0007043;GO:0007051;GO:0007052;GO:0007165;GO:0007166;GO:0007167;GO:0007169;GO:0007178;GO:0007179;GO:0007264;GO:0007265;GO:0007266;GO:0007411;GO:0007596;GO:0007599;GO:0008152;GO:0009605;GO:0009653;GO:0009966;GO:0009967;GO:0009987;GO:0010033;GO:0010627;GO:0010638;GO:0010646;GO:0010647;GO:0010720;GO:0010721;GO:…	GO:0000166;GO:0003824;GO:0003924;GO:0005488;GO:0005515;GO:0005525;GO:0008092;GO:0016462;GO:0016787;GO:0016817;GO:0016818;GO:0017022;GO:0017076;GO:0017111;GO:0019001;GO:0032553;GO:0032555;GO:0032561;GO:0035639	GO:0005768;GO:0005789;GO:0005829;GO:0005856;GO:0005886;GO:0005911;GO:0005912;GO:0005924;GO:0005925;GO:0005938;GO:0016020;GO:0030027;GO:0030054;GO:0030055;GO:0030496;GO:0031090;GO:0031982;GO:0031988;GO:0032154;GO:0032155;GO:0042995;GO:0043226;GO:0043227;GO:0043228;GO:0043229;GO:0043230;GO:0043231;GO:0043232;GO:0043296;GO:0044421;GO:0044422;GO:0044424;GO:0044425;GO:0044432;GO:0044444;GO:0044446;GO:…	TCLLIVFSK	9	2	1	TC[125.0477]LLIVFSK	TC[130.0791]LLIVFSK	C	-0.988502	-3.36204	-0.587667	NaN	-0.598889	-0.916889	-0.785467	-0.661577	NaN	-1.84983	-0.724482	0.466001	-0.448662	-0.41286	-0.357948	-0.355309	-0.793402	-0.497108	-0.451256	-1.90939	NaN	NaN	-0.566791	NaN	-0.389436	-0.752363	-0.78937	-0.323504	-0.92316	-0.987897	-0.847894
	+	0.0908571	1.73603	0.193747	Q9UQ80	Proliferation-associated protein 2G4	PA2G4	179	GO:0006139;GO:0006351;GO:0006355;GO:0006364;GO:0006396;GO:0006417;GO:0006807;GO:0007050;GO:0008152;GO:0008283;GO:0009058;GO:0009059;GO:0009889;GO:0009890;GO:0009892;GO:0009987;GO:0010468;GO:0010556;GO:0010558;GO:0010605;GO:0010608;GO:0010629;GO:0010941;GO:0016070;GO:0016072;GO:0019219;GO:0019222;GO:0022402;GO:0031323;GO:0031324;GO:0031326;GO:0031327;GO:0032268;GO:0032774;GO:0034470;GO:0034641;GO:…	GO:0001071;GO:0003676;GO:0003677;GO:0003700;GO:0005488;GO:0005515;GO:0019899;GO:0031625	GO:0005634;GO:0005654;GO:0005730;GO:0005737;GO:0016020;GO:0030529;GO:0031982;GO:0031988;GO:0032991;GO:0043226;GO:0043227;GO:0043228;GO:0043229;GO:0043230;GO:0043231;GO:0043232;GO:0044421;GO:0044422;GO:0044424;GO:0044428;GO:0044446;GO:0044464;GO:0065010;GO:0070062	VAHSFNCTPIEGMLSHQLK	19	2;3;4	1	VAHSFNC[125.0477]TPIEGMLSHQLK	VAHSFNC[130.0791]TPIEGMLSHQLK	C	NaN	NaN	0.751041	NaN	0.19274	1.22008	0.693946	0.467575	NaN	1.66492	1.41235	0.37224	0.106908	0.308471	NaN	0.667836	0.544672	0.629317	1.39822	0.516099	NaN	NaN	0.595304	0.459495	0.580897	0.217183	0.654594	0.239063	0.353418	0.448627	0.399922
	+	0.17373	1.3128	0.193341	P49327	Fatty acid synthase	FASN	2091	GO:0001649;GO:0006082;GO:0006084;GO:0006091;GO:0006112;GO:0006520;GO:0006575;GO:0006629;GO:0006631;GO:0006633;GO:0006637;GO:0006638;GO:0006639;GO:0006641;GO:0006662;GO:0006732;GO:0006766;GO:0006767;GO:0006807;GO:0008152;GO:0008610;GO:0009058;GO:0009108;GO:0009308;GO:0009893;GO:0009987;GO:0010033;GO:0015939;GO:0015980;GO:0016053;GO:0018904;GO:0019222;GO:0019432;GO:0019752;GO:0030154;GO:0031323;GO:…	GO:0000166;GO:0003824;GO:0004312;GO:0004313;GO:0004314;GO:0004315;GO:0004316;GO:0004317;GO:0004319;GO:0004320;GO:0005488;GO:0008144;GO:0008270;GO:0016295;GO:0016296;GO:0016297;GO:0016407;GO:0016417;GO:0016418;GO:0016419;GO:0016420;GO:0016491;GO:0016614;GO:0016616;GO:0016627;GO:0016628;GO:0016740;GO:0016746;GO:0016747;GO:0016787;GO:0016788;GO:0016790;GO:0016829;GO:0016835;GO:0016836;GO:0019171;GO:…	GO:0005737;GO:0005739;GO:0005794;GO:0005829;GO:0005886;GO:0016020;GO:0016023;GO:0031410;GO:0031982;GO:0031988;GO:0042470;GO:0042587;GO:0043226;GO:0043227;GO:0043229;GO:0043230;GO:0043231;GO:0044421;GO:0044424;GO:0044444;GO:0044464;GO:0048770;GO:0065010;GO:0070062	MASCLEVLDLFLNQPHMVLSSFVLAEK	27	3;4	1	MASC[125.0477]LEVLDLFLNQPHMVLSSFVLAEK	MASC[130.0791]LEVLDLFLNQPHMVLSSFVLAEK	C	NaN	NaN	NaN	NaN	NaN	NaN	NaN	NaN	NaN	NaN	NaN	NaN	NaN	-0.788604	0.0574716	-0.369961	-0.181458	-0.906079	0.480858	NaN	NaN	NaN	NaN	-0.155108	-0.743546	-0.959376	-0.0382735	0.0197941	-0.193559	NaN	NaN
	+	0.113914	1.58124	0.191574	P07203	Glutathione peroxidase 1	GPX1	115	GO:0000038;GO:0000302;GO:0001101;GO:0001525;GO:0001659;GO:0001885;GO:0002064;GO:0002682;GO:0002683;GO:0002861;GO:0002862;GO:0003008;GO:0003013;GO:0003015;GO:0003018;GO:0006082;GO:0006139;GO:0006144;GO:0006163;GO:0006195;GO:0006464;GO:0006518;GO:0006520;GO:0006575;GO:0006629;GO:0006631;GO:0006638;GO:0006639;GO:0006641;GO:0006662;GO:0006690;GO:0006725;GO:0006749;GO:0006753;GO:0006790;GO:0006807;GO:…	GO:0003824;GO:0004601;GO:0004602;GO:0005488;GO:0005515;GO:0008430;GO:0016209;GO:0016491;GO:0016597;GO:0016684;GO:0016705;GO:0017124;GO:0019904;GO:0031406;GO:0042277;GO:0043176;GO:0043295;GO:0047066;GO:0072341	GO:0005634;GO:0005737;GO:0005739;GO:0005759;GO:0005829;GO:0031974;GO:0031982;GO:0031988;GO:0043226;GO:0043227;GO:0043229;GO:0043230;GO:0043231;GO:0043233;GO:0044421;GO:0044422;GO:0044424;GO:0044429;GO:0044444;GO:0044446;GO:0044464;GO:0065010;GO:0070013;GO:0070062	CEVNGAGAHPLFAFLR	16	2	1	C[125.0477]EVNGAGAHPLFAFLR	C[130.0791]EVNGAGAHPLFAFLR	C	1.14614	-0.861895	0.927378	1.10707	1.13114	1.16286	1.39697	0.927457	0.951032	1.20893	NaN	-1.01044	1.23096	0.973417	1.19905	0.959175	1.13471	1.19163	1.19391	0.865983	NaN	1.14867	0.944785	0.899562	1.50699	1.1121	1.35052	1.42252	NaN	1.29168	1.51556
	+	0.146598	1.41252	0.190836	P62701	40S ribosomal protein S4, X isoform	RPS4X	41	GO:0000184;GO:0000956;GO:0006139;GO:0006401;GO:0006402;GO:0006412;GO:0006413;GO:0006414;GO:0006415;GO:0006417;GO:0006605;GO:0006612;GO:0006613;GO:0006614;GO:0006807;GO:0006810;GO:0006886;GO:0007275;GO:0008152;GO:0008284;GO:0009056;GO:0009057;GO:0009058;GO:0009059;GO:0009889;GO:0009891;GO:0009893;GO:0009987;GO:0010467;GO:0010468;GO:0010556;GO:0010557;GO:0010604;GO:0010608;GO:0015031;GO:0016032;GO:…	GO:0003676;GO:0003723;GO:0003735;GO:0005198;GO:0005488;GO:0019843	GO:0005829;GO:0005840;GO:0005844;GO:0005912;GO:0005924;GO:0005925;GO:0015935;GO:0016020;GO:0022627;GO:0030054;GO:0030055;GO:0030529;GO:0031982;GO:0031988;GO:0032991;GO:0043226;GO:0043227;GO:0043228;GO:0043229;GO:0043230;GO:0043232;GO:0044421;GO:0044422;GO:0044424;GO:0044444;GO:0044446;GO:0044464;GO:0065010;GO:0070062;GO:0070161	ECLPLIIFLR	10	2	1	EC[125.0477]LPLIIFLR	EC[130.0791]LPLIIFLR	C	-0.122898	-2.50927	0.743905	NaN	0.59666	0.64318	NaN	0.756618	NaN	0.637084	0.934841	0.0375143	0.375545	0.285508	0.75524	0.085274	1.04996	0.421952	1.04819	NaN	NaN	0.309533	0.0510903	0.913367	0.889857	0.620152	0.298324	-0.0101791	0.0821757	0.185237	0.197315
	+	0.142746	1.43054	0.190597	P22234	Bifunctional phosphoribosylaminoimidazole carboxylase/phosphoribosylaminoimidazole succinocarboxamide synthetase	PAICS	281	GO:0006139;GO:0006144;GO:0006163;GO:0006164;GO:0006188;GO:0006189;GO:0006725;GO:0006753;GO:0006807;GO:0008152;GO:0009058;GO:0009112;GO:0009113;GO:0009117;GO:0009123;GO:0009124;GO:0009126;GO:0009127;GO:0009150;GO:0009152;GO:0009156;GO:0009161;GO:0009165;GO:0009167;GO:0009168;GO:0009259;GO:0009260;GO:0009987;GO:0018130;GO:0034641;GO:0034654;GO:0042440;GO:0044237;GO:0044238;GO:0044249;GO:0044271;GO:…	GO:0000166;GO:0003824;GO:0004638;GO:0004639;GO:0005488;GO:0005515;GO:0005524;GO:0016829;GO:0016830;GO:0016831;GO:0016874;GO:0016879;GO:0016881;GO:0017076;GO:0030554;GO:0032553;GO:0032555;GO:0032559;GO:0035639;GO:0042802	GO:0005829;GO:0016020;GO:0031982;GO:0031988;GO:0043226;GO:0043227;GO:0043230;GO:0044421;GO:0044424;GO:0044444;GO:0044464;GO:0065010;GO:0070062	VVVLMGSTSDLGHCEK	16	2;3	1	VVVLMGSTSDLGHC[125.0477]EK	VVVLMGSTSDLGHC[130.0791]EK	C	0.465123	-1.88431	0.172603	0.454198	0.433077	-0.380407	0.549169	0.30977	0.617522	-0.238207	0.575399	0.717116	-0.233829	0.324211	1.41973	-1.15458	0.546199	0.593139	0.515985	-1.03953	0.792259	0.76098	0.130864	-0.986126	0.613002	0.546149	0.619788	0.308513	0.590617	0.464339	0.999667
	+	0.0864841	1.76462	0.187066	P30050	60S ribosomal protein L12	RPL12	162	GO:0000184;GO:0000956;GO:0006139;GO:0006401;GO:0006402;GO:0006412;GO:0006413;GO:0006414;GO:0006415;GO:0006605;GO:0006612;GO:0006613;GO:0006614;GO:0006807;GO:0006810;GO:0006886;GO:0008152;GO:0009056;GO:0009057;GO:0009058;GO:0009059;GO:0009987;GO:0010467;GO:0015031;GO:0016032;GO:0016043;GO:0016070;GO:0016071;GO:0019058;GO:0019083;GO:0019538;GO:0022411;GO:0022414;GO:0022415;GO:0032774;GO:0032984;GO:…	GO:0003735;GO:0005198	GO:0005829;GO:0005912;GO:0005924;GO:0005925;GO:0015934;GO:0016020;GO:0022625;GO:0030054;GO:0030055;GO:0030529;GO:0031982;GO:0031988;GO:0032991;GO:0043226;GO:0043227;GO:0043230;GO:0044421;GO:0044422;GO:0044424;GO:0044444;GO:0044446;GO:0044464;GO:0065010;GO:0070062;GO:0070161	HPHDIIDDINSGAVECPAS	19	2;3	1	HPHDIIDDINSGAVEC[125.0477]PAS	HPHDIIDDINSGAVEC[130.0791]PAS	C	1.4963	NaN	1.35946	1.31313	1.23614	1.04686	NaN	0.65	1.96467	1.50008	1.49952	1.53738	0.937667	1.16831	1.32642	0.954178	0.72549	1.20984	1.92072	NaN	0.678177	1.3536	0.263385	0.34378	1.06887	1.04994	1.35969	0.718951	1.15545	0.61397	0.719536
	+	0.0701038	1.88584	0.18088	Q01995	Transgelin	TAGLN	38	GO:0007517;GO:0009987;GO:0030154;GO:0030855;GO:0032502;GO:0048513;GO:0048856;GO:0048869;GO:0061061		GO:0005737;GO:0044424;GO:0044464	LVEWIIVQCGPDVGR	15	2	1	LVEWIIVQC[125.0477]GPDVGR		C	1.45165	0.922352	1.37828	1.20388	1.43253	1.98346	1.42014	1.39071	1.79106	1.46102	0.652276	0.43844	0.82113	1.021	0.796732	0.525674	1.0276	1.23282	2.40478	NaN	1.97768	1.90171	0.626458	1.61366	1.27602	1.37817	1.92731	1.44481	2.29133	0.647194	1.04179
	+	0.117417	1.56034	0.180518	Q9Y490	Talin-1	TLN1	2243	GO:0001775;GO:0002576;GO:0003008;GO:0003012;GO:0006810;GO:0006887;GO:0006928;GO:0006935;GO:0006936;GO:0006950;GO:0006984;GO:0006986;GO:0006996;GO:0007010;GO:0007016;GO:0007043;GO:0007044;GO:0007155;GO:0007165;GO:0007411;GO:0007596;GO:0007599;GO:0008152;GO:0009605;GO:0009987;GO:0010033;GO:0016032;GO:0016043;GO:0016192;GO:0016337;GO:0019538;GO:0022607;GO:0022610;GO:0030029;GO:0030036;GO:0030168;GO:…	GO:0005102;GO:0005178;GO:0005198;GO:0005200;GO:0005488;GO:0005515;GO:0008092;GO:0017166;GO:0019904;GO:0030274;GO:0032403	GO:0001726;GO:0005576;GO:0005737;GO:0005815;GO:0005829;GO:0005886;GO:0005911;GO:0005912;GO:0005924;GO:0005925;GO:0009986;GO:0016020;GO:0030054;GO:0030055;GO:0031253;GO:0031256;GO:0031982;GO:0031988;GO:0032587;GO:0042995;GO:0043226;GO:0043227;GO:0043230;GO:0044421;GO:0044422;GO:0044424;GO:0044425;GO:0044430;GO:0044444;GO:0044446;GO:0044459;GO:0044463;GO:0044464;GO:0065010;GO:0070062;GO:0070161	ECANGYLELLDHVLLTLQKPSPELK	25	3;4	1	EC[125.0477]ANGYLELLDHVLLTLQKPSPELK	EC[130.0791]ANGYLELLDHVLLTLQKPSPELK	C	-0.304583	NaN	-0.133118	0.364608	-0.197685	NaN	-0.639228	-0.931442	-0.278752	-0.0261503	-0.0468785	-0.0251271	-0.130297	-0.59206	-0.733286	-0.0671465	-0.198187	-0.50952	-0.0728087	NaN	NaN	-0.824709	-0.246565	0.0344944	-0.026527	-0.0775365	-0.178978	0.0960535	-0.308402	-0.448817	-0.224343
+	+	0.0335152	2.34395	0.174727	Q9BQE3	Tubulin alpha-1C chain	TUBA1C	129	GO:0006457;GO:0006458;GO:0006461;GO:0006810;GO:0007017;GO:0008152;GO:0009987;GO:0016043;GO:0019538;GO:0022607;GO:0030705;GO:0034621;GO:0034622;GO:0043170;GO:0043623;GO:0043933;GO:0044237;GO:0044238;GO:0044260;GO:0044267;GO:0046907;GO:0051084;GO:0051234;GO:0051258;GO:0051301;GO:0051649;GO:0065003;GO:0071822;GO:0071840;GO:0071841;GO:0071842;GO:0071844	GO:0000166;GO:0003824;GO:0003924;GO:0005198;GO:0005200;GO:0005488;GO:0005525;GO:0016462;GO:0016787;GO:0016817;GO:0016818;GO:0017076;GO:0017111;GO:0019001;GO:0032553;GO:0032555;GO:0032561;GO:0035639	GO:0005634;GO:0005874;GO:0005881;GO:0031982;GO:0032991;GO:0043226;GO:0043227;GO:0043229;GO:0043231;GO:0043234;GO:0044422;GO:0044424;GO:0044430;GO:0044444;GO:0044446;GO:0044464	KLADQCTGLQGFLVFHSFGGGTGSGFTSLLMER	33	3;4	1	KLADQC[125.0477]TGLQGFLVFHSFGGGTGSGFTSLLMER	KLADQC[130.0791]TGLQGFLVFHSFGGGTGSGFTSLLMER	C	0.0278994	-1.54365	0.211344	0.374981	0.187598	0.0611452	0.405709	0.204325	0.105177	0.188863	0.168328	NaN	0.475867	0.0782577	0.359716	0.635185	0.471716	0.623085	0.223716	-1.51877	0.533346	0.339622	0.449585	0.353485	0.0977851	0.622677	0.190483	0.341943	-0.487146	0.32513	0.126189
	+	0.0977278	1.68591	0.172584	Q9UHD8	Septin-9	SEPTIN9	375	GO:0006461;GO:0007049;GO:0008152;GO:0009987;GO:0016043;GO:0022607;GO:0043933;GO:0051259;GO:0051291;GO:0051301;GO:0065003;GO:0071822;GO:0071840	GO:0000166;GO:0003824;GO:0003924;GO:0005488;GO:0005525;GO:0016462;GO:0016787;GO:0016817;GO:0016818;GO:0017076;GO:0017111;GO:0019001;GO:0032553;GO:0032555;GO:0032561;GO:0035639	GO:0001725;GO:0005737;GO:0005856;GO:0005874;GO:0015629;GO:0032432;GO:0032991;GO:0042641;GO:0043226;GO:0043228;GO:0043229;GO:0043232;GO:0043234;GO:0044422;GO:0044424;GO:0044430;GO:0044444;GO:0044446;GO:0044464;GO:0048471	LTVIDTPGFGDHINNENCWQPIMK	24	3	1	LTVIDTPGFGDHINNENC[125.0477]WQPIMK	LTVIDTPGFGDHINNENC[130.0791]WQPIMK	C	1.74327	NaN	NaN	NaN	NaN	NaN	NaN	0.740662	NaN	1.00679	NaN	0.71725	0.317318	0.631739	NaN	0.47208	0.87725	0.400839	NaN	NaN	NaN	1.47969	0.983017	1.17483	0.642922	0.392172	NaN	0.771468	0.994549	NaN	0.771233
+	+	0.0193032	2.66659	0.170837	Q96HE7	ERO1-like protein alpha	ERO1A	166	GO:0000302;GO:0006082;GO:0006457;GO:0006458;GO:0006464;GO:0006520;GO:0006575;GO:0006807;GO:0006810;GO:0006811;GO:0006812;GO:0006816;GO:0006873;GO:0006874;GO:0006875;GO:0006915;GO:0006950;GO:0006979;GO:0006984;GO:0006986;GO:0007165;GO:0007204;GO:0008152;GO:0008219;GO:0009266;GO:0009308;GO:0009628;GO:0009987;GO:0010033;GO:0010035;GO:0012501;GO:0016043;GO:0016265;GO:0019471;GO:0019538;GO:0019725;GO:…	GO:0003756;GO:0003824;GO:0015035;GO:0015036;GO:0016491;GO:0016667;GO:0016671;GO:0016853;GO:0016860;GO:0016862;GO:0016864	GO:0005783;GO:0005788;GO:0005789;GO:0016020;GO:0031090;GO:0031974;GO:0043226;GO:0043227;GO:0043229;GO:0043231;GO:0043233;GO:0044422;GO:0044424;GO:0044425;GO:0044432;GO:0044444;GO:0044446;GO:0044464;GO:0070013	HDDSSDNFCEADDIQSPEAEYVDLLLNPER	30	3	1	HDDSSDNFC[125.0477]EADDIQSPEAEYVDLLLNPER	HDDSSDNFC[130.0791]EADDIQSPEAEYVDLLLNPER	C	0.973917	NaN	1.16997	0.87271	1.31086	1.00745	NaN	0.684587	1.18542	1.03062	1.19017	NaN	0.972066	0.582484	NaN	0.80321	0.557299	1.29249	NaN	NaN	1.67713	0.83871	1.0274	0.931213	1.04918	0.772311	0.694861	0.734798	0.858137	0.832422	0.525692
	+	0.144989	1.42047	0.168582	Q86WV6	Stimulator of interferon genes protein	STING1	309	GO:0001816;GO:0001817;GO:0001819;GO:0002218;GO:0002230;GO:0002252;GO:0002253;GO:0002376;GO:0002682;GO:0002684;GO:0002697;GO:0002831;GO:0006355;GO:0006357;GO:0006915;GO:0006950;GO:0006952;GO:0006955;GO:0008219;GO:0009607;GO:0009615;GO:0009889;GO:0009891;GO:0009893;GO:0009987;GO:0010033;GO:0010468;GO:0010556;GO:0010557;GO:0010604;GO:0010628;GO:0012501;GO:0016265;GO:0019219;GO:0019222;GO:0031323;GO:…	GO:0000166;GO:0005488;GO:0005515;GO:0008134;GO:0017076;GO:0019001;GO:0019899;GO:0019900;GO:0019901;GO:0030551;GO:0032553;GO:0032555;GO:0032561;GO:0035438;GO:0042802;GO:0042803;GO:0046983	GO:0005741;GO:0005777;GO:0005789;GO:0005794;GO:0005886;GO:0012506;GO:0016020;GO:0016021;GO:0019867;GO:0030659;GO:0031090;GO:0031224;GO:0031966;GO:0031968;GO:0042579;GO:0043226;GO:0043227;GO:0043229;GO:0043231;GO:0044422;GO:0044424;GO:0044425;GO:0044429;GO:0044432;GO:0044433;GO:0044444;GO:0044446;GO:0044464;GO:0048471	TLEDILADAPESQNNCR	17	2	1	TLEDILADAPESQNNC[125.0477]R	TLEDILADAPESQNNC[130.0791]R	C	0.665856	NaN	0.330146	NaN	0.0237528	0.144906	0.315037	NaN	NaN	NaN	NaN	0.197507	-0.00760461	0.0064884	0.693205	0.561359	0.832303	-0.086948	0.0220347	NaN	NaN	NaN	0.0983417	0.773036	0.215301	-0.177568	0.206083	NaN	-0.0270763	-0.157391	NaN
	+	0.0767785	1.83561	0.164521	P46776	60S ribosomal protein L27a	RPL27A	70	GO:0000184;GO:0000956;GO:0006139;GO:0006401;GO:0006402;GO:0006412;GO:0006413;GO:0006414;GO:0006415;GO:0006605;GO:0006612;GO:0006613;GO:0006614;GO:0006807;GO:0006810;GO:0006886;GO:0008152;GO:0009056;GO:0009057;GO:0009058;GO:0009059;GO:0009987;GO:0010467;GO:0015031;GO:0016032;GO:0016043;GO:0016070;GO:0016071;GO:0019058;GO:0019083;GO:0019538;GO:0022411;GO:0022414;GO:0022415;GO:0032774;GO:0032984;GO:…	GO:0003676;GO:0003723;GO:0003735;GO:0005198;GO:0005488	GO:0005829;GO:0015934;GO:0016020;GO:0022625;GO:0030529;GO:0032991;GO:0044422;GO:0044424;GO:0044444;GO:0044446;GO:0044464	NQSFCPTVNLDK	12	2	1	NQSFC[125.0477]PTVNLDK	NQSFC[130.0791]PTVNLDK	C	0.0573778	NaN	-0.982655	NaN	NaN	NaN	NaN	-2.08399	NaN	-0.783741	-0.398422	-0.360705	-0.700929	-0.584076	-0.129338	-1.09321	-0.353269	-0.420426	-0.400506	NaN	NaN	-0.88766	-1.07754	-0.325496	-0.604706	-1.16481	-0.957873	-0.711694	-0.174913	-1.03587	-0.818473
	+	0.126434	1.51266	0.163398	P68104	Elongation factor 1-alpha 1	EEF1A1	111	GO:0006139;GO:0006351;GO:0006355;GO:0006412;GO:0006414;GO:0006807;GO:0008152;GO:0009058;GO:0009059;GO:0009719;GO:0009889;GO:0009987;GO:0010033;GO:0010467;GO:0010468;GO:0010556;GO:0016070;GO:0019219;GO:0019222;GO:0019538;GO:0031323;GO:0031326;GO:0032774;GO:0034641;GO:0034645;GO:0042221;GO:0043170;GO:0044237;GO:0044238;GO:0044249;GO:0044260;GO:0044267;GO:0050789;GO:0050794;GO:0050896;GO:0051171;GO:…	GO:0000049;GO:0000166;GO:0003676;GO:0003723;GO:0003746;GO:0003824;GO:0003924;GO:0005488;GO:0005515;GO:0005525;GO:0008135;GO:0016462;GO:0016787;GO:0016817;GO:0016818;GO:0017076;GO:0017111;GO:0019001;GO:0019899;GO:0019900;GO:0019901;GO:0032553;GO:0032555;GO:0032561;GO:0035639	GO:0005615;GO:0005634;GO:0005730;GO:0005737;GO:0005829;GO:0005853;GO:0005856;GO:0016020;GO:0030863;GO:0030864;GO:0031253;GO:0031256;GO:0031982;GO:0031988;GO:0032587;GO:0032991;GO:0043226;GO:0043227;GO:0043228;GO:0043229;GO:0043230;GO:0043231;GO:0043232;GO:0043234;GO:0044421;GO:0044422;GO:0044424;GO:0044425;GO:0044428;GO:0044430;GO:0044444;GO:0044446;GO:0044448;GO:0044459;GO:0044463;GO:0044464;GO:…	NMITGTSQADCAVLIVAAGVGEFEAGISK	29	3	1	NMITGTSQADC[125.0477]AVLIVAAGVGEFEAGISK	NMITGTSQADC[130.0791]AVLIVAAGVGEFEAGISK	C	0.697318	-0.281333	0.643833	1.60027	1.51191	NaN	0.965286	0.930926	NaN	0.644738	0.663664	0.722203	1.00253	0.683561	0.635298	0.604287	0.53334	1.81068	1.09493	0.19419	NaN	0.781412	1.00098	1.17061	0.918376	0.978349	0.75951	0.88369	0.631805	0.780434	0.850143
	+	0.115842	1.56983	0.155771	Q14204	Cytoplasmic dynein 1 heavy chain 1	DYNC1H1	3325	GO:0000086;GO:0000226;GO:0000278;GO:0002376;GO:0002478;GO:0002495;GO:0002504;GO:0006810;GO:0006928;GO:0006996;GO:0007010;GO:0007017;GO:0007018;GO:0007049;GO:0007051;GO:0007052;GO:0009987;GO:0016043;GO:0019882;GO:0019884;GO:0019886;GO:0022402;GO:0022607;GO:0022618;GO:0033962;GO:0034063;GO:0034621;GO:0034622;GO:0043933;GO:0048002;GO:0051234;GO:0051293;GO:0051649;GO:0051656;GO:0065003;GO:0071826;GO:…	GO:0000166;GO:0003774;GO:0003777;GO:0003824;GO:0005488;GO:0005524;GO:0016462;GO:0016787;GO:0016817;GO:0016818;GO:0016887;GO:0017076;GO:0017111;GO:0030554;GO:0032553;GO:0032555;GO:0032559;GO:0035639	GO:0005813;GO:0005815;GO:0005829;GO:0005868;GO:0005874;GO:0005875;GO:0016020;GO:0030175;GO:0030286;GO:0031982;GO:0031988;GO:0032991;GO:0042995;GO:0043226;GO:0043227;GO:0043228;GO:0043229;GO:0043230;GO:0043232;GO:0043234;GO:0044421;GO:0044422;GO:0044424;GO:0044430;GO:0044444;GO:0044446;GO:0044464;GO:0065010;GO:0070062	LALESICLLLGESTTDWK	18	2;3	1	LALESIC[125.0477]LLLGESTTDWK	LALESIC[130.0791]LLLGESTTDWK	C	0.0623911	0.0667892	-0.0889805	NaN	-0.0668565	-0.0920835	0.148486	-0.156731	NaN	-0.336235	0.115715	NaN	0.127012	0.0685767	0.127342	-0.123875	0.379523	-0.0671936	0.0763121	NaN	NaN	NaN	0.126234	0.260331	0.220276	-0.00720762	0.111718	-0.494199	0.0219258	-0.00272006	0.135392
	+	0.174086	1.30729	0.155125	Q8WUM4	Programmed cell death 6-interacting protein	PDCD6IP	40	GO:0000920;GO:0006810;GO:0006915;GO:0007049;GO:0008219;GO:0009987;GO:0010564;GO:0010824;GO:0012501;GO:0015031;GO:0016032;GO:0016265;GO:0019058;GO:0022414;GO:0022415;GO:0032506;GO:0032886;GO:0033043;GO:0045184;GO:0046605;GO:0050789;GO:0050794;GO:0051128;GO:0051234;GO:0051493;GO:0051726;GO:0065007;GO:0070507	GO:0001664;GO:0005102;GO:0005488;GO:0005515;GO:0031871;GO:0042802;GO:0042803;GO:0046983;GO:0048306	GO:0001772;GO:0005737;GO:0005815;GO:0005829;GO:0005912;GO:0005924;GO:0005925;GO:0016020;GO:0016023;GO:0030054;GO:0030055;GO:0031410;GO:0031982;GO:0031988;GO:0042470;GO:0043226;GO:0043227;GO:0043229;GO:0043230;GO:0043231;GO:0044421;GO:0044422;GO:0044424;GO:0044425;GO:0044430;GO:0044432;GO:0044444;GO:0044446;GO:0044459;GO:0044464;GO:0048770;GO:0065010;GO:0070062;GO:0070161;GO:0070971	FIQQTYPSGGEEQAQYCR	18	2	1	FIQQTYPSGGEEQAQYC[125.0477]R	FIQQTYPSGGEEQAQYC[130.0791]R	C	0.723847	-1.03895	0.780863	0.812058	0.873999	0.890815	0.887262	0.0432989	1.06366	0.762062	0.877518	0.624884	0.609703	-1.02503	0.754105	0.876551	0.642355	1.33135	0.802842	-0.571611	0.504101	1.14694	1.247	0.877325	0.650308	0.642668	0.66661	0.244241	0.632585	0.4962	0.633804
	+	0.169061	1.32897	0.152629	P21333	Filamin-A	FLNA	2293	GO:0000226;GO:0000902;GO:0000904;GO:0001775;GO:0001837;GO:0002576;GO:0006139;GO:0006140;GO:0006351;GO:0006355;GO:0006356;GO:0006366;GO:0006807;GO:0006810;GO:0006887;GO:0006996;GO:0007010;GO:0007015;GO:0007017;GO:0007051;GO:0007052;GO:0007155;GO:0007165;GO:0007166;GO:0007186;GO:0007187;GO:0007188;GO:0007193;GO:0007194;GO:0007195;GO:0007212;GO:0007264;GO:0007596;GO:0007599;GO:0008104;GO:0008152;GO:…	GO:0001948;GO:0003779;GO:0004871;GO:0005102;GO:0005488;GO:0005515;GO:0008092;GO:0008134;GO:0017016;GO:0017048;GO:0017160;GO:0019899;GO:0031267;GO:0034987;GO:0034988;GO:0042802;GO:0042803;GO:0046983;GO:0048365;GO:0051015;GO:0051020;GO:0060089	GO:0005576;GO:0005634;GO:0005737;GO:0005802;GO:0005829;GO:0005856;GO:0005884;GO:0005886;GO:0005912;GO:0005924;GO:0005925;GO:0015629;GO:0016020;GO:0030054;GO:0030055;GO:0030863;GO:0031523;GO:0031982;GO:0031988;GO:0032991;GO:0043025;GO:0043198;GO:0043226;GO:0043227;GO:0043228;GO:0043229;GO:0043230;GO:0043231;GO:0043232;GO:0043234;GO:0044297;GO:0044421;GO:0044422;GO:0044424;GO:0044427;GO:0044428;GO:…	DGSCGVAYVVQEPGDYEVSVK	21	2;3	1	DGSC[125.0477]GVAYVVQEPGDYEVSVK	DGSC[130.0791]GVAYVVQEPGDYEVSVK	C	1.13155	-1.29747	0.011613	0.75587	0.288083	0.135904	0.283598	1.43904	1.33218	0.618804	0.352065	0.654128	0.160143	0.43139	0.37651	0.436837	-0.000146021	0.724403	0.197548	0.108652	0.110773	0.236042	0.18569	0.869001	0.190376	0.391134	0.170734	0.391237	0.101471	0.177577	0.143125
	+	0.142562	1.43358	0.152514	O75533	Splicing factor 3B subunit 1	SF3B1	1059	GO:0000375;GO:0000377;GO:0000398;GO:0003002;GO:0006139;GO:0006396;GO:0006397;GO:0006807;GO:0007389;GO:0008152;GO:0008380;GO:0009952;GO:0009987;GO:0010467;GO:0016070;GO:0016071;GO:0032502;GO:0034641;GO:0043170;GO:0044237;GO:0044238;GO:0044260;GO:0090304	GO:0003682;GO:0005488	GO:0005634;GO:0005654;GO:0005681;GO:0005689;GO:0016604;GO:0016607;GO:0030529;GO:0032991;GO:0043226;GO:0043227;GO:0043229;GO:0043231;GO:0044422;GO:0044424;GO:0044428;GO:0044446;GO:0044451;GO:0044464;GO:0071013	ICFELLELLK	10	2	1	IC[125.0477]FELLELLK	IC[130.0791]FELLELLK	C	NaN	-1.41676	NaN	NaN	NaN	NaN	NaN	NaN	NaN	NaN	NaN	NaN	0.421462	0.340064	NaN	0.126214	0.29144	0.30144	0.314628	NaN	NaN	NaN	NaN	NaN	0.208563	0.352857	NaN	0.377598	0.00637762	-0.28416	0.233548
	+	0.10008	1.66302	0.152458	Q9UHQ9	NADH-cytochrome b5 reductase 1	CYB5R1	208	GO:0006066;GO:0006629;GO:0006694;GO:0008152;GO:0008202;GO:0008610;GO:0009058;GO:0016125;GO:0016126;GO:0044238;GO:0044281	GO:0003824;GO:0004128;GO:0016491;GO:0016651;GO:0016653	GO:0005739;GO:0016020;GO:0016021;GO:0031224;GO:0031982;GO:0031988;GO:0043226;GO:0043227;GO:0043229;GO:0043230;GO:0043231;GO:0044421;GO:0044424;GO:0044425;GO:0044444;GO:0044464;GO:0065010;GO:0070062	VPEDPTQCFLLFANQTEK	18	2	1	VPEDPTQC[125.0477]FLLFANQTEK	VPEDPTQC[130.0791]FLLFANQTEK	C	-0.126919	NaN	0.053717	0.136833	-0.0398324	0.262948	0.27364	NaN	0.00423573	NaN	0.231235	NaN	0.419728	0.420367	0.136193	-0.0894419	0.0187175	-0.658574	0.552107	NaN	NaN	0.140243	-0.161867	0.190801	0.0732467	0.199629	-0.0632608	0.0576031	-0.0281626	-0.169222	-0.0885608
	+	0.0850581	1.77627	0.148147	Q9Y696	Chloride intracellular channel protein 4	CLIC4	100	GO:0000902;GO:0000904;GO:0001525;GO:0001763;GO:0001886;GO:0003382;GO:0006810;GO:0006811;GO:0006820;GO:0006821;GO:0006873;GO:0006885;GO:0006915;GO:0007035;GO:0007163;GO:0008219;GO:0009566;GO:0009653;GO:0009913;GO:0009987;GO:0010035;GO:0010038;GO:0012501;GO:0015698;GO:0016043;GO:0016265;GO:0019725;GO:0022414;GO:0030003;GO:0030004;GO:0030154;GO:0030216;GO:0030334;GO:0030336;GO:0030641;GO:0030855;GO:…	GO:0005215;GO:0005216;GO:0005244;GO:0005253;GO:0005254;GO:0008509;GO:0015075;GO:0015267;GO:0022803;GO:0022832;GO:0022836;GO:0022838;GO:0022857;GO:0022891;GO:0022892	GO:0005622;GO:0005737;GO:0005739;GO:0005813;GO:0005815;GO:0005829;GO:0005856;GO:0005886;GO:0005902;GO:0005911;GO:0009986;GO:0012506;GO:0015629;GO:0016020;GO:0016363;GO:0030054;GO:0030496;GO:0030659;GO:0031090;GO:0031982;GO:0031988;GO:0032991;GO:0034702;GO:0034707;GO:0042995;GO:0043226;GO:0043227;GO:0043228;GO:0043229;GO:0043230;GO:0043231;GO:0043232;GO:0043234;GO:0044421;GO:0044422;GO:0044424;GO:…	TDVNKIEEFLEEVLCPPK	18	2;3	1	TDVNKIEEFLEEVLC[125.0477]PPK	TDVNKIEEFLEEVLC[130.0791]PPK	C	1.12739	0.0820092	1.65643	1.35683	1.5818	1.58307	1.54177	1.53245	1.58773	1.39295	1.52059	1.46284	1.03333	1.52044	1.70028	1.29441	1.30096	1.32961	1.57191	-0.346214	1.44371	1.54478	1.33794	NaN	1.31317	0.15467	1.42403	1.35586	1.76533	1.21352	1.29773
	+	0.123877	1.53396	0.147898	Q9GZM7	Tubulointerstitial nephritis antigen-like	TINAGL1	446	GO:0002376;GO:0006810;GO:0006955;GO:0007155;GO:0009987;GO:0016192;GO:0016197;GO:0022610;GO:0046907;GO:0050896;GO:0051234;GO:0051649	GO:0001871;GO:0003824;GO:0004872;GO:0005044;GO:0005198;GO:0005201;GO:0005488;GO:0008233;GO:0008234;GO:0016787;GO:0030246;GO:0030247;GO:0038024;GO:0070011	GO:0005576;GO:0005615;GO:0005737;GO:0031982;GO:0031988;GO:0043226;GO:0043227;GO:0043230;GO:0044421;GO:0044424;GO:0044464;GO:0065010;GO:0070062	GVNECDIESFVLGVWGR	17	2;3	1	GVNEC[125.0477]DIESFVLGVWGR	GVNEC[130.0791]DIESFVLGVWGR	C	0.152528	NaN	0.258976	NaN	-0.105096	NaN	NaN	NaN	NaN	NaN	NaN	NaN	NaN	NaN	-0.152617	-0.537083	-0.136038	1.11489	0.0642866	NaN	NaN	NaN	-0.289421	NaN	0.296665	NaN	-0.332801	NaN	-0.0967452	-0.531776	-0.149333
	+	0.14712	1.40674	0.146408	P14618	Pyruvate kinase PKM	PKM	49	GO:0005975;GO:0005996;GO:0006006;GO:0006066;GO:0008152;GO:0008219;GO:0009987;GO:0012501;GO:0016265;GO:0019318;GO:0044237;GO:0044238;GO:0044262;GO:0044281	GO:0000166;GO:0000287;GO:0003823;GO:0003824;GO:0004743;GO:0005488;GO:0005524;GO:0016301;GO:0016740;GO:0016772;GO:0016773;GO:0017076;GO:0023023;GO:0023026;GO:0030554;GO:0030955;GO:0031420;GO:0032553;GO:0032555;GO:0032559;GO:0035639;GO:0043167;GO:0043169;GO:0046872	GO:0005634;GO:0005737;GO:0005739;GO:0005829;GO:0005886;GO:0005929;GO:0016020;GO:0031012;GO:0031982;GO:0031988;GO:0042995;GO:0043226;GO:0043227;GO:0043229;GO:0043230;GO:0043231;GO:0044421;GO:0044424;GO:0044444;GO:0044464;GO:0065010;GO:0070062	NTGIICTIGPASR	13	2	1	NTGIIC[125.0477]TIGPASR	NTGIIC[130.0791]TIGPASR	C	-0.433981	-1.69593	-0.273743	-0.784718	-0.221706	-0.311142	-0.320573	-0.265102	-1.29101	-0.23125	0.0713124	-0.30542	-0.664075	-0.434688	-0.180077	-0.568469	0.0185352	-0.0368393	-0.190277	-3.29223	NaN	-0.583022	-0.692498	-0.262933	-0.636773	-0.444824	-0.54645	-0.420542	-0.458454	-0.637582	-0.816376
	+	0.166373	1.33809	0.14508	P30043	Flavin reductase (NADPH)	BLVRB	188	GO:0006778;GO:0006787;GO:0006807;GO:0008152;GO:0009056;GO:0009987;GO:0033013;GO:0033015;GO:0034641;GO:0042167;GO:0042168;GO:0042440;GO:0044237;GO:0044248;GO:0044270;GO:0044281;GO:0046149;GO:0046483;GO:0046700;GO:0051186;GO:0051187	GO:0003824;GO:0004074;GO:0016491;GO:0016627;GO:0016628;GO:0016645;GO:0016646;GO:0042602	GO:0005654;GO:0005737;GO:0005829;GO:0005886;GO:0016020;GO:0031982;GO:0031988;GO:0043226;GO:0043227;GO:0043230;GO:0044421;GO:0044422;GO:0044424;GO:0044428;GO:0044444;GO:0044446;GO:0044464;GO:0065010;GO:0070062	CLTTDEYDGHSTYPSHQYQ	19	2;3	1	C[125.0477]LTTDEYDGHSTYPSHQYQ	C[130.0791]LTTDEYDGHSTYPSHQYQ	C	2.90423	3.16739	2.92859	3.44775	4.45632	2.98607	2.99509	2.95293	3.39786	3.48687	3.89026	3.07343	2.83849	3.26661	3.00256	2.96159	2.90509	3.31998	3.03655	3.87346	2.83277	2.90348	3.31472	3.06307	3.25663	3.83889	2.98353	2.87674	3.83067	3.43392	2.96209
	+	0.142532	1.43213	0.140155	P30048	Thioredoxin-dependent peroxide reductase, mitochondrial	PRDX3	127	GO:0000302;GO:0001893;GO:0002237;GO:0006355;GO:0006464;GO:0006873;GO:0006950;GO:0006979;GO:0006996;GO:0007005;GO:0008152;GO:0008284;GO:0009056;GO:0009607;GO:0009889;GO:0009987;GO:0010033;GO:0010035;GO:0010466;GO:0010468;GO:0010556;GO:0010941;GO:0016043;GO:0018158;GO:0018171;GO:0018193;GO:0018198;GO:0019219;GO:0019220;GO:0019222;GO:0019538;GO:0019725;GO:0030099;GO:0030154;GO:0031323;GO:0031326;GO:…	GO:0003824;GO:0004601;GO:0004857;GO:0004866;GO:0004869;GO:0005488;GO:0005515;GO:0008022;GO:0008379;GO:0008785;GO:0016209;GO:0016491;GO:0016651;GO:0016667;GO:0016668;GO:0016684;GO:0016705;GO:0019899;GO:0019900;GO:0019901;GO:0030234;GO:0030414;GO:0043027;GO:0043028;GO:0051920;GO:0061134;GO:0061135	GO:0005737;GO:0005739;GO:0005759;GO:0005768;GO:0005769;GO:0005829;GO:0031974;GO:0031982;GO:0031988;GO:0043226;GO:0043227;GO:0043229;GO:0043230;GO:0043231;GO:0043233;GO:0044421;GO:0044422;GO:0044424;GO:0044429;GO:0044444;GO:0044446;GO:0044464;GO:0065010;GO:0070013;GO:0070062	ANEFHDVNCEVVAVSVDSHFSHLAWINTPR	30	3;4;5	1	ANEFHDVNC[125.0477]EVVAVSVDSHFSHLAWINTPR	ANEFHDVNC[130.0791]EVVAVSVDSHFSHLAWINTPR	C	NaN	NaN	1.74625	2.12946	1.65748	1.74028	1.88176	1.73486	2.2626	1.61122	NaN	1.47599	NaN	1.35972	1.21862	1.93205	1.45981	1.70636	NaN	NaN	NaN	1.50195	2.29393	1.45633	2.23159	1.77562	2.22691	NaN	NaN	NaN	1.58176
	+	0.146117	1.41464	0.135313	P15121	Aldo-keto reductase family 1 member B1	AKR1B1	45	GO:0005975;GO:0005996;GO:0006000;GO:0006066;GO:0006629;GO:0006694;GO:0006700;GO:0006950;GO:0008152;GO:0008202;GO:0008207;GO:0008610;GO:0009058;GO:0009987;GO:0010817;GO:0016051;GO:0019318;GO:0019319;GO:0034637;GO:0034754;GO:0042445;GO:0042446;GO:0044237;GO:0044238;GO:0044249;GO:0044262;GO:0044281;GO:0044283;GO:0046165;GO:0046364;GO:0046370;GO:0050896;GO:0065007;GO:0065008	GO:0003824;GO:0004032;GO:0004033;GO:0008106;GO:0009055;GO:0016491;GO:0016614;GO:0016616;GO:0016903;GO:0043795	GO:0005615;GO:0005654;GO:0005737;GO:0005829;GO:0031982;GO:0031988;GO:0043226;GO:0043227;GO:0043230;GO:0044421;GO:0044422;GO:0044424;GO:0044428;GO:0044444;GO:0044446;GO:0044464;GO:0065010;GO:0070062	HIDCAHVYQNENEVGVAIQEK	21	3;4	1	HIDC[125.0477]AHVYQNENEVGVAIQEK	HIDC[130.0791]AHVYQNENEVGVAIQEK	C	0.403446	NaN	0.571302	NaN	0.682661	1.1713	1.08587	0.380729	1.1311	0.24101	0.712534	0.535991	0.484543	0.667759	1.16461	0.610567	0.649319	0.52167	0.784238	NaN	0.730087	0.450427	0.348569	1.14647	0.506422	0.102693	0.640583	0.661054	0.594369	0.60375	0.329386
+	+	0.0447414	2.15244	0.134112	P05091	Aldehyde dehydrogenase, mitochondrial	ALDH2	472	GO:0001505;GO:0005975;GO:0006066;GO:0006067;GO:0006068;GO:0006069;GO:0006805;GO:0007154;GO:0007267;GO:0007268;GO:0008152;GO:0009056;GO:0009058;GO:0009987;GO:0023052;GO:0034308;GO:0034310;GO:0042133;GO:0042136;GO:0044237;GO:0044238;GO:0044249;GO:0044281;GO:0044282;GO:0046164;GO:0055114;GO:0065007;GO:0065008	GO:0003824;GO:0004029;GO:0004030;GO:0009055;GO:0016491;GO:0016620;GO:0016903	GO:0005759;GO:0031974;GO:0031982;GO:0031988;GO:0043226;GO:0043227;GO:0043230;GO:0043233;GO:0044421;GO:0044422;GO:0044424;GO:0044429;GO:0044444;GO:0044446;GO:0044464;GO:0065010;GO:0070013;GO:0070062	ANYLSQALQAGTVWVNCYDVFGAQSPFGGYK	31	3	1	ANYLSQALQAGTVWVNC[125.0477]YDVFGAQSPFGGYK	ANYLSQALQAGTVWVNC[130.0791]YDVFGAQSPFGGYK	C	0.462704	NaN	0.525131	NaN	0.747651	0.590829	0.414246	0.446988	0.661428	0.421868	0.533823	NaN	0.436215	0.491019	0.533073	0.405326	0.511	0.460826	0.419699	NaN	0.535669	NaN	0.435887	0.756353	0.294594	0.385254	0.672789	0.450262	0.563435	NaN	0.369107
+	+	0.000734694	4.28842	0.1081	Q9Y490	Talin-1	TLN1	1045	GO:0001775;GO:0002576;GO:0003008;GO:0003012;GO:0006810;GO:0006887;GO:0006928;GO:0006935;GO:0006936;GO:0006950;GO:0006984;GO:0006986;GO:0006996;GO:0007010;GO:0007016;GO:0007043;GO:0007044;GO:0007155;GO:0007165;GO:0007411;GO:0007596;GO:0007599;GO:0008152;GO:0009605;GO:0009987;GO:0010033;GO:0016032;GO:0016043;GO:0016192;GO:0016337;GO:0019538;GO:0022607;GO:0022610;GO:0030029;GO:0030036;GO:0030168;GO:…	GO:0005102;GO:0005178;GO:0005198;GO:0005200;GO:0005488;GO:0005515;GO:0008092;GO:0017166;GO:0019904;GO:0030274;GO:0032403	GO:0001726;GO:0005576;GO:0005737;GO:0005815;GO:0005829;GO:0005886;GO:0005911;GO:0005912;GO:0005924;GO:0005925;GO:0009986;GO:0016020;GO:0030054;GO:0030055;GO:0031253;GO:0031256;GO:0031982;GO:0031988;GO:0032587;GO:0042995;GO:0043226;GO:0043227;GO:0043230;GO:0044421;GO:0044422;GO:0044424;GO:0044425;GO:0044430;GO:0044444;GO:0044446;GO:0044459;GO:0044463;GO:0044464;GO:0065010;GO:0070062;GO:0070161	AQEACGPLEMDSALSVVQNLEKDLQEVK	28	3	1	AQEAC[125.0477]GPLEMDSALSVVQNLEKDLQEVK	AQEAC[130.0791]GPLEMDSALSVVQNLEKDLQEVK	C	0.669985	NaN	0.816815	0.734947	0.73623	0.551343	0.61384	0.708401	1.06887	0.61305	0.798964	0.79184	0.572892	0.692573	0.781535	0.741126	0.824206	0.475975	0.749823	0.567474	NaN	0.748795	0.844448	0.79013	0.725387	0.673726	0.582434	0.723653	0.652773	0.659779	0.718554
	+	0.14604	1.41038	0.10738	P00367	Glutamate dehydrogenase 1, mitochondrial	GLUD1	376	GO:0002791;GO:0002793;GO:0006082;GO:0006520;GO:0006536;GO:0006537;GO:0006538;GO:0006541;GO:0006807;GO:0008152;GO:0008652;GO:0009056;GO:0009058;GO:0009063;GO:0009064;GO:0009065;GO:0009084;GO:0009308;GO:0009309;GO:0009310;GO:0009987;GO:0010646;GO:0016053;GO:0016054;GO:0019752;GO:0021762;GO:0023051;GO:0032024;GO:0032502;GO:0032879;GO:0034641;GO:0042180;GO:0043436;GO:0044106;GO:0044237;GO:0044238;GO:…	GO:0000166;GO:0003824;GO:0004352;GO:0004353;GO:0005488;GO:0005515;GO:0005524;GO:0005525;GO:0016491;GO:0016597;GO:0016638;GO:0016639;GO:0017076;GO:0019001;GO:0030554;GO:0031406;GO:0032553;GO:0032555;GO:0032559;GO:0032561;GO:0035639;GO:0042802;GO:0043176;GO:0043531;GO:0048037;GO:0050662;GO:0051287;GO:0070403;GO:0070728	GO:0005737;GO:0005739;GO:0005759;GO:0031974;GO:0043226;GO:0043227;GO:0043229;GO:0043231;GO:0043233;GO:0044422;GO:0044424;GO:0044429;GO:0044444;GO:0044446;GO:0044464;GO:0070013	AKPYEGSILEADCDILIPAASEK	23	3	1	AKPYEGSILEADC[125.0477]DILIPAASEK	AKPYEGSILEADC[130.0791]DILIPAASEK	C	1.98641	NaN	1.70964	NaN	2.60601	NaN	2.2839	1.63672	NaN	NaN	1.92648	1.89852	1.72389	1.57189	1.58249	1.54964	1.35121	1.4167	1.62613	NaN	NaN	2.20689	1.25575	1.51803	1.54777	1.49159	1.66113	NaN	1.55323	1.77024	1.31097
	+	0.0937952	1.71035	0.101538	Q9Y2A7	Nck-associated protein 1	NCKAP1	969	GO:0000578;GO:0001667;GO:0001701;GO:0001756;GO:0001843;GO:0002376;GO:0003002;GO:0006915;GO:0006928;GO:0006950;GO:0006952;GO:0006955;GO:0006996;GO:0007010;GO:0007163;GO:0007165;GO:0007166;GO:0007167;GO:0007169;GO:0007264;GO:0007265;GO:0007354;GO:0007389;GO:0007417;GO:0007492;GO:0008078;GO:0008104;GO:0008105;GO:0008219;GO:0008595;GO:0009653;GO:0009790;GO:0009792;GO:0009798;GO:0009880;GO:0009887;GO:…	GO:0005488;GO:0005515;GO:0032403	GO:0005829;GO:0005912;GO:0005924;GO:0005925;GO:0016021;GO:0030054;GO:0030055;GO:0031209;GO:0031224;GO:0031253;GO:0031256;GO:0031258;GO:0031982;GO:0031988;GO:0032991;GO:0043226;GO:0043227;GO:0043230;GO:0043234;GO:0044421;GO:0044424;GO:0044425;GO:0044444;GO:0044459;GO:0044463;GO:0044464;GO:0065010;GO:0070062;GO:0070161	VAMNVYELSSAAGLPCEIDPALVVALSSQK	30	3	1	VAMNVYELSSAAGLPC[125.0477]EIDPALVVALSSQK	VAMNVYELSSAAGLPC[130.0791]EIDPALVVALSSQK	C	0.700339	NaN	0.554333	NaN	NaN	NaN	NaN	0.521678	NaN	NaN	NaN	-0.067747	NaN	0.461791	NaN	0.3371	0.288035	0.57388	0.429933	NaN	NaN	NaN	NaN	0.0501687	0.629973	0.626366	0.486755	NaN	0.449781	0.504316	0.344851
	+	0.15193	1.38926	0.0980693	O00299	Chloride intracellular channel protein 1	CLIC1	178	GO:0006810;GO:0006811;GO:0006820;GO:0006821;GO:0006873;GO:0007155;GO:0007165;GO:0009987;GO:0015698;GO:0016337;GO:0019725;GO:0022610;GO:0030278;GO:0034109;GO:0042391;GO:0042592;GO:0045595;GO:0045597;GO:0045667;GO:0045669;GO:0048518;GO:0048522;GO:0048878;GO:0050789;GO:0050793;GO:0050794;GO:0050801;GO:0050896;GO:0051094;GO:0051234;GO:0051239;GO:0051716;GO:0051726;GO:0051881;GO:0055082;GO:0065007;GO:…	GO:0005215;GO:0005216;GO:0005244;GO:0005253;GO:0005254;GO:0008509;GO:0015075;GO:0015267;GO:0022803;GO:0022832;GO:0022836;GO:0022838;GO:0022857;GO:0022891;GO:0022892	GO:0005615;GO:0005634;GO:0005635;GO:0005737;GO:0005739;GO:0005886;GO:0005903;GO:0016020;GO:0031090;GO:0031965;GO:0031967;GO:0031975;GO:0031982;GO:0031988;GO:0032991;GO:0034702;GO:0034707;GO:0042995;GO:0043226;GO:0043227;GO:0043229;GO:0043230;GO:0043231;GO:0043234;GO:0044421;GO:0044422;GO:0044424;GO:0044425;GO:0044428;GO:0044444;GO:0044446;GO:0044464;GO:0048471;GO:0065010;GO:0070062;GO:0072562	FLDGNELTLADCNLLPK	17	2	1	FLDGNELTLADC[125.0477]NLLPK	FLDGNELTLADC[130.0791]NLLPK	C	0.262104	-0.0385079	0.328624	0.372629	0.316965	0.38535	0.274353	0.226208	0.594263	0.175012	0.344848	0.366989	0.40341	0.22694	0.325951	0.271664	0.112896	0.303398	0.314064	-1.26922	0.565561	0.495404	0.0432915	0.348054	0.220172	0.316611	-0.00567255	0.026439	0.142903	0.0841787	-0.119772
	+	0.123918	1.53093	0.0951949	P06733	Alpha-enolase	ENO1	389	GO:0000122;GO:0001558;GO:0005975;GO:0005996;GO:0006006;GO:0006066;GO:0006094;GO:0006139;GO:0006351;GO:0006355;GO:0006357;GO:0006807;GO:0008152;GO:0009058;GO:0009059;GO:0009607;GO:0009615;GO:0009889;GO:0009890;GO:0009892;GO:0009987;GO:0010468;GO:0010556;GO:0010558;GO:0010605;GO:0010629;GO:0016051;GO:0016070;GO:0019219;GO:0019222;GO:0019318;GO:0019319;GO:0030308;GO:0031323;GO:0031324;GO:0031326;GO:…	GO:0000287;GO:0000988;GO:0000989;GO:0001071;GO:0003676;GO:0003677;GO:0003700;GO:0003712;GO:0003714;GO:0003824;GO:0004634;GO:0005488;GO:0005515;GO:0016829;GO:0016835;GO:0016836;GO:0019899;GO:0043167;GO:0043169;GO:0046872;GO:0051020	GO:0000015;GO:0005615;GO:0005634;GO:0005737;GO:0005829;GO:0005886;GO:0016020;GO:0031430;GO:0031982;GO:0031988;GO:0032991;GO:0043226;GO:0043227;GO:0043229;GO:0043230;GO:0043231;GO:0043234;GO:0044421;GO:0044422;GO:0044424;GO:0044444;GO:0044445;GO:0044449;GO:0044464;GO:0065010;GO:0070062	SGETEDTFIADLVVGLCTGQIK	22	2;3	1	SGETEDTFIADLVVGLC[125.0477]TGQIK	SGETEDTFIADLVVGLC[130.0791]TGQIK	C	-0.0669711	-1.33942	0.0063795	0.0225099	0.0579319	0.160935	-0.225125	0.165967	NaN	-0.181054	-0.29339	-0.137736	0.0051753	-0.575554	0.201528	-0.0962024	-0.0885314	-0.166857	-0.117622	-0.496213	NaN	-0.058813	-0.158499	0.206157	-0.279643	-0.0866873	-0.222699	-0.0729759	-0.234781	-0.257989	-0.178899
	+	0.164154	1.3459	0.0841807	P62308	Small nuclear ribonucleoprotein G	SNRPG	45	GO:0000245;GO:0000375;GO:0000377;GO:0000387;GO:0000398;GO:0006139;GO:0006351;GO:0006353;GO:0006366;GO:0006369;GO:0006396;GO:0006397;GO:0006807;GO:0008152;GO:0008334;GO:0008380;GO:0009058;GO:0009059;GO:0009987;GO:0010467;GO:0016043;GO:0016070;GO:0016071;GO:0022607;GO:0022618;GO:0031123;GO:0031124;GO:0032774;GO:0034621;GO:0034622;GO:0034641;GO:0034645;GO:0034660;GO:0043170;GO:0043933;GO:0044237;GO:…		GO:0005654;GO:0005681;GO:0005683;GO:0005685;GO:0005687;GO:0005689;GO:0005732;GO:0005829;GO:0030529;GO:0030532;GO:0032991;GO:0034708;GO:0034709;GO:0034719;GO:0043234;GO:0044422;GO:0044424;GO:0044428;GO:0044444;GO:0044446;GO:0044464;GO:0071013	GFDPFMNLVIDECVEMATSGQQNNIGMVVIR	31	3	1	GFDPFMNLVIDEC[125.0477]VEMATSGQQNNIGMVVIR	GFDPFMNLVIDEC[130.0791]VEMATSGQQNNIGMVVIR	C	NaN	NaN	1.07687	NaN	NaN	0.635258	1.24469	1.11821	NaN	0.989535	NaN	1.09895	0.668427	0.744987	NaN	0.793018	0.637232	0.875035	NaN	NaN	NaN	NaN	0.939928	1.10964	0.724793	0.698075	NaN	0.862862	1.01321	0.962308	NaN
	+	0.10176	1.64391	0.0803351	O00410	Importin-5	IPO5	229	GO:0001101;GO:0006140;GO:0006605;GO:0006606;GO:0006607;GO:0006610;GO:0006810;GO:0006886;GO:0006913;GO:0009719;GO:0009894;GO:0009987;GO:0010033;GO:0010243;GO:0014075;GO:0015031;GO:0016032;GO:0017038;GO:0019219;GO:0019222;GO:0030811;GO:0031323;GO:0031329;GO:0032386;GO:0032388;GO:0032879;GO:0032880;GO:0033121;GO:0033124;GO:0033157;GO:0034260;GO:0034762;GO:0034764;GO:0042221;GO:0042306;GO:0042307;GO:…	GO:0004857;GO:0005095;GO:0005215;GO:0005488;GO:0005515;GO:0008536;GO:0008565;GO:0017016;GO:0019899;GO:0022892;GO:0030234;GO:0030695;GO:0031267;GO:0051020;GO:0060589	GO:0005634;GO:0005643;GO:0005654;GO:0005730;GO:0005737;GO:0005794;GO:0016020;GO:0031090;GO:0031965;GO:0032991;GO:0043226;GO:0043227;GO:0043228;GO:0043229;GO:0043231;GO:0043232;GO:0043234;GO:0044422;GO:0044424;GO:0044425;GO:0044428;GO:0044444;GO:0044446;GO:0044464;GO:0046930	HFADLLPGFLQAVNDSCYQNDDSVLK	26	3	1	HFADLLPGFLQAVNDSC[125.0477]YQNDDSVLK	HFADLLPGFLQAVNDSC[130.0791]YQNDDSVLK	C	0.756222	NaN	0.652371	0.900609	0.986156	0.925736	1.03767	0.793592	NaN	0.763019	0.760527	NaN	0.800001	0.980057	1.0671	0.949715	0.932498	0.778783	0.786174	NaN	NaN	1.02283	0.655356	0.836192	0.726571	0.637424	0.744365	0.918883	0.873187	0.888359	0.736204
	+	0.160207	1.36155	0.0630392	P12429	Annexin A3	ANXA3	246	GO:0001775;GO:0002252;GO:0002263;GO:0002274;GO:0002275;GO:0002283;GO:0002366;GO:0002376;GO:0006355;GO:0006810;GO:0006887;GO:0006897;GO:0006909;GO:0006950;GO:0006952;GO:0009607;GO:0009617;GO:0009889;GO:0009987;GO:0010324;GO:0010468;GO:0010556;GO:0010594;GO:0010595;GO:0016043;GO:0016044;GO:0016192;GO:0019219;GO:0019222;GO:0022603;GO:0030334;GO:0030335;GO:0031323;GO:0031326;GO:0032879;GO:0032940;GO:…	GO:0004857;GO:0004859;GO:0005488;GO:0005509;GO:0005515;GO:0005543;GO:0005544;GO:0008289;GO:0019834;GO:0030234;GO:0043167;GO:0043169;GO:0046872;GO:0048306;GO:0055102	GO:0005737;GO:0005886;GO:0012506;GO:0016020;GO:0016023;GO:0030141;GO:0030659;GO:0030666;GO:0030670;GO:0031090;GO:0031410;GO:0031982;GO:0031988;GO:0042581;GO:0043226;GO:0043227;GO:0043229;GO:0043230;GO:0043231;GO:0044421;GO:0044422;GO:0044424;GO:0044433;GO:0044444;GO:0044446;GO:0044464;GO:0065010;GO:0070062	DIVDSIKGELSGHFEDLLLAIVNCVR	26	3;4	1	DIVDSIKGELSGHFEDLLLAIVNC[125.0477]VR	DIVDSIKGELSGHFEDLLLAIVNC[130.0791]VR	C	0.369856	-0.635557	0.440445	0.460551	0.168494	0.225625	0.527149	0.390487	0.368346	0.247995	0.576186	0.274103	0.375028	0.425208	0.536713	0.548517	0.601441	0.48673	0.17381	0.120812	0.394275	0.549136	0.413515	0.291438	0.39229	0.444714	0.359703	0.374358	0.369807	0.27959	0.541567
+	+	0.0487333	2.10579	-0.0747942	P07355	Annexin A2	ANXA2	262	GO:0001525;GO:0001765;GO:0001932;GO:0001934;GO:0002090;GO:0002091;GO:0006461;GO:0006605;GO:0006810;GO:0006886;GO:0006900;GO:0006996;GO:0007589;GO:0008284;GO:0009892;GO:0009893;GO:0009894;GO:0009895;GO:0009966;GO:0009987;GO:0010469;GO:0010562;GO:0010604;GO:0010605;GO:0010638;GO:0015031;GO:0016043;GO:0016044;GO:0016050;GO:0019220;GO:0019222;GO:0022607;GO:0023051;GO:0030100;GO:0030193;GO:0030195;GO:…	GO:0004857;GO:0004859;GO:0005488;GO:0005509;GO:0005515;GO:0005543;GO:0005544;GO:0005546;GO:0008289;GO:0019834;GO:0030234;GO:0035091;GO:0043167;GO:0043169;GO:0046872;GO:0048306;GO:0055102	GO:0001726;GO:0005604;GO:0005615;GO:0005634;GO:0005765;GO:0005768;GO:0005769;GO:0005774;GO:0005811;GO:0005886;GO:0005938;GO:0009986;GO:0010008;GO:0016020;GO:0016023;GO:0016323;GO:0019897;GO:0019898;GO:0030496;GO:0031090;GO:0031410;GO:0031902;GO:0031982;GO:0031988;GO:0035749;GO:0042383;GO:0042470;GO:0042995;GO:0043220;GO:0043226;GO:0043227;GO:0043229;GO:0043230;GO:0043231;GO:0044352;GO:0044354;GO:…	EVKGDLENAFLNLVQCIQNK	20	3	1	EVKGDLENAFLNLVQC[125.0477]IQNK	EVKGDLENAFLNLVQC[130.0791]IQNK	C	-0.600788	-0.755994	-0.604723	-0.296142	-0.538287	-0.471912	-0.522022	-0.426631	-0.584074	-0.514348	-0.504446	NaN	-0.34307	-0.241265	-0.281689	-0.259598	-0.363924	-0.218911	-0.308746	-0.642973	-0.363678	-0.297038	-0.62704	-0.350732	-0.422913	-0.244788	-0.597731	-0.210531	-0.531871	-0.572263	-0.514812
	+	0.16341	1.34889	-0.0794411	Q99497	Parkinson disease protein 7	PARK7	46	GO:0000302;GO:0001504;GO:0001505;GO:0001817;GO:0001819;GO:0001932;GO:0001933;GO:0001934;GO:0006066;GO:0006081;GO:0006082;GO:0006089;GO:0006355;GO:0006357;GO:0006464;GO:0006469;GO:0006517;GO:0006810;GO:0006836;GO:0006873;GO:0006914;GO:0006950;GO:0006952;GO:0006954;GO:0006979;GO:0006996;GO:0007005;GO:0007165;GO:0007264;GO:0007265;GO:0007338;GO:0007610;GO:0007626;GO:0008152;GO:0008344;GO:0009056;GO:…	GO:0000988;GO:0000989;GO:0003676;GO:0003712;GO:0003713;GO:0003723;GO:0003729;GO:0003824;GO:0005102;GO:0005488;GO:0005507;GO:0005515;GO:0008134;GO:0008233;GO:0016491;GO:0016530;GO:0016531;GO:0016532;GO:0016684;GO:0016705;GO:0016787;GO:0019172;GO:0019899;GO:0019900;GO:0019955;GO:0035257;GO:0035258;GO:0042802;GO:0042803;GO:0043167;GO:0043169;GO:0045340;GO:0046872;GO:0046914;GO:0046983;GO:0050681;GO:…	GO:0000785;GO:0005634;GO:0005737;GO:0005739;GO:0005758;GO:0005759;GO:0005829;GO:0005886;GO:0016020;GO:0016604;GO:0016605;GO:0030424;GO:0031970;GO:0031974;GO:0031982;GO:0031988;GO:0042995;GO:0043005;GO:0043226;GO:0043227;GO:0043229;GO:0043230;GO:0043231;GO:0043233;GO:0044297;GO:0044421;GO:0044422;GO:0044424;GO:0044425;GO:0044427;GO:0044428;GO:0044429;GO:0044444;GO:0044446;GO:0044451;GO:0044464;GO:…	VTVAGLAGKDPVQCSR	16	2	1	VTVAGLAGKDPVQC[125.0477]SR	VTVAGLAGKDPVQC[130.0791]SR	C	-0.74848	-1.14253	-0.765799	-0.658557	-0.777505	-0.572663	-0.749375	-0.631692	-0.641168	-0.704738	-0.963452	-0.580585	-0.615452	-0.362313	-0.68707	-0.370898	-0.74776	-0.541003	-0.635993	-0.640999	-0.661825	-0.414808	-1.06017	-0.356603	-0.787385	-0.493845	-1.03706	-0.80055	-1.00321	-1.07128	-0.955256
	+	0.146273	1.41149	-0.0842401	Q9UBQ7	Glyoxylate reductase/hydroxypyruvate reductase	GRHPR	123	GO:0003008;GO:0006081;GO:0006082;GO:0006461;GO:0006807;GO:0006810;GO:0007588;GO:0008152;GO:0009987;GO:0016043;GO:0019752;GO:0022607;GO:0032501;GO:0032787;GO:0034641;GO:0042180;GO:0043436;GO:0043648;GO:0043933;GO:0044237;GO:0044281;GO:0046487;GO:0046903;GO:0051234;GO:0051259;GO:0055114;GO:0065003;GO:0071822;GO:0071840	GO:0000166;GO:0003824;GO:0005488;GO:0005515;GO:0008465;GO:0016491;GO:0016614;GO:0016616;GO:0016618;GO:0030267;GO:0031406;GO:0042802;GO:0042803;GO:0046983;GO:0048037;GO:0050661;GO:0050662;GO:0051287;GO:0070402	GO:0005737;GO:0005782;GO:0005829;GO:0031907;GO:0031974;GO:0031982;GO:0031988;GO:0043226;GO:0043227;GO:0043230;GO:0043233;GO:0044421;GO:0044422;GO:0044424;GO:0044438;GO:0044439;GO:0044444;GO:0044446;GO:0044464;GO:0065010;GO:0070013;GO:0070062	GIRVGYTPDVLTDTTAELAVSLLLTTCRR	29	4	1	GIRVGYTPDVLTDTTAELAVSLLLTTC[125.0477]RR	GIRVGYTPDVLTDTTAELAVSLLLTTC[130.0791]RR	C	0.309011	NaN	0.732696	0.471659	0.37655	0.233954	0.453111	0.855153	NaN	1.02296	0.52446	0.356788	NaN	NaN	0.734404	0.677909	0.534589	0.476409	NaN	NaN	NaN	0.308724	0.309054	0.331673	0.475016	0.613492	0.14235	0.00134737	0.257721	0.522519	0.314154
	+	0.0777881	1.82568	-0.0880553	P13489	Ribonuclease inhibitor	RNH1	409	GO:0006139;GO:0006401;GO:0006402;GO:0006807;GO:0008152;GO:0009056;GO:0009057;GO:0009987;GO:0016070;GO:0016071;GO:0019222;GO:0022603;GO:0034641;GO:0043086;GO:0043170;GO:0044092;GO:0044237;GO:0044238;GO:0044248;GO:0044260;GO:0044265;GO:0045765;GO:0050789;GO:0050790;GO:0050793;GO:0051239;GO:0065007;GO:0065009;GO:0090304;GO:2000026	GO:0004857;GO:0008428;GO:0030234	GO:0005737;GO:0031982;GO:0031988;GO:0032311;GO:0032991;GO:0043226;GO:0043227;GO:0043230;GO:0043234;GO:0044421;GO:0044424;GO:0044464;GO:0065010;GO:0070062	ELDLSNNCLGDAGILQLVESVR	22	2;3	1	ELDLSNNC[125.0477]LGDAGILQLVESVR	ELDLSNNC[130.0791]LGDAGILQLVESVR	C	0.393546	NaN	0.619301	0.385281	0.245499	0.374913	0.33183	0.662283	0.242764	0.508672	0.558676	0.454877	0.31224	0.810579	0.184077	0.327146	0.504496	0.533182	0.275131	-0.0012259	0.51659	0.590376	0.332311	0.500039	0.386196	0.478749	0.0801106	0.563443	0.136268	0.358462	0.216597
+	+	0.0301042	2.39961	-0.107295	P07195	L-lactate dehydrogenase B chain	LDHB	294	GO:0005975;GO:0006082;GO:0006089;GO:0006090;GO:0006139;GO:0006732;GO:0006733;GO:0006753;GO:0006807;GO:0008152;GO:0009117;GO:0009987;GO:0019362;GO:0019674;GO:0019752;GO:0032787;GO:0034641;GO:0042180;GO:0043436;GO:0044237;GO:0044238;GO:0044281;GO:0046483;GO:0046496;GO:0051186;GO:0055086;GO:0072524	GO:0000166;GO:0003824;GO:0004457;GO:0004459;GO:0005488;GO:0016491;GO:0016614;GO:0016616;GO:0048037;GO:0050662;GO:0051287	GO:0005737;GO:0005739;GO:0005829;GO:0016020;GO:0031982;GO:0031988;GO:0043226;GO:0043227;GO:0043229;GO:0043230;GO:0043231;GO:0044421;GO:0044424;GO:0044425;GO:0044444;GO:0044464;GO:0045121;GO:0065010;GO:0070062	GMYGIENEVFLSLPCILNAR	20	2;3	1	GMYGIENEVFLSLPC[125.0477]ILNAR	GMYGIENEVFLSLPC[130.0791]ILNAR	C	-0.346825	-0.490863	-0.347293	0.0178559	-0.486643	-0.218703	-0.464594	-0.492547	0.117463	-0.367325	-0.393249	NaN	-0.340755	-0.209253	-0.301556	-0.362382	-0.316615	-0.0960364	-0.453096	-0.517543	NaN	-0.182904	-0.427254	-0.328488	-0.419138	-0.407673	-0.424693	-0.457913	-0.627485	-0.487597	-0.70631
	+	0.0995425	1.67389	-0.108898	O60437	Periplakin	PPL	449	GO:0031424;GO:0032502	GO:0005198;GO:0005200	GO:0005634;GO:0005739;GO:0005856;GO:0005886;GO:0005911;GO:0016020;GO:0030054;GO:0030057;GO:0031982;GO:0031988;GO:0043226;GO:0043227;GO:0043228;GO:0043229;GO:0043230;GO:0043231;GO:0043232;GO:0044421;GO:0044424;GO:0044444;GO:0044464;GO:0065010;GO:0070062;GO:0070161	LIAPAVCFVIPPTDPEALALADSLGSQYR	29	3	1	LIAPAVC[125.0477]FVIPPTDPEALALADSLGSQYR	LIAPAVC[130.0791]FVIPPTDPEALALADSLGSQYR	C	-0.0952784	NaN	-0.0568482	0.184498	NaN	0.243584	0.0530033	0.189319	NaN	NaN	0.0812331	NaN	NaN	0.144914	0.189003	0.379264	0.0733582	0.138733	NaN	NaN	NaN	-0.453615	NaN	0.480871	0.017632	NaN	0.0426922	NaN	-0.0433656	NaN	-0.331199
	+	0.171675	1.31828	-0.109516	P24534	Elongation factor 1-beta	EEF1B2	161	GO:0006412;GO:0006414;GO:0008152;GO:0009058;GO:0009059;GO:0009987;GO:0010467;GO:0019538;GO:0034645;GO:0043170;GO:0044237;GO:0044238;GO:0044249;GO:0044260;GO:0044267	GO:0003676;GO:0003723;GO:0003746;GO:0005488;GO:0008135	GO:0005737;GO:0005829;GO:0005853;GO:0032991;GO:0043234;GO:0044424;GO:0044444;GO:0044464	PWDDETDMAKLEECVR	16	2	1	PWDDETDMAKLEEC[125.0477]VR	PWDDETDMAKLEEC[130.0791]VR	C	0.589904	NaN	1.0382	1.15836	0.711924	1.05386	0.743087	0.855384	0.619088	0.755059	0.874808	0.670172	1.06393	0.515936	-0.704241	0.420918	0.808484	0.554197	0.899362	NaN	0.577949	1.03511	0.651739	0.941125	0.79424	1.11704	0.791713	0.739111	0.684396	0.622851	0.277201
+	+	0.03474	2.32325	-0.113291	P58546	Myotrophin	MTPN	83	GO:0001558;GO:0006066;GO:0006355;GO:0006417;GO:0006576;GO:0006584;GO:0006725;GO:0006807;GO:0008152;GO:0009308;GO:0009653;GO:0009712;GO:0009888;GO:0009889;GO:0009891;GO:0009893;GO:0009987;GO:0010468;GO:0010556;GO:0010557;GO:0010604;GO:0010608;GO:0010611;GO:0010613;GO:0014742;GO:0014743;GO:0016049;GO:0016202;GO:0018958;GO:0019219;GO:0019222;GO:0021533;GO:0021707;GO:0021953;GO:0030154;GO:0030182;GO:…		GO:0005634;GO:0005829;GO:0008290;GO:0030424;GO:0031982;GO:0031988;GO:0032991;GO:0042995;GO:0043005;GO:0043226;GO:0043227;GO:0043229;GO:0043230;GO:0043231;GO:0043234;GO:0044421;GO:0044422;GO:0044424;GO:0044430;GO:0044444;GO:0044446;GO:0044464;GO:0048471;GO:0065010;GO:0070062	GADINAPDKHHITPLLSAVYEGHVSCVK	28	3;4;5	1	GADINAPDKHHITPLLSAVYEGHVSC[125.0477]VK	GADINAPDKHHITPLLSAVYEGHVSC[130.0791]VK	C	-0.580615	-0.763173	-0.289444	-0.214619	-0.363842	-0.211694	-0.234011	-0.236931	-0.116874	-0.232353	-0.250052	-0.080784	-0.0545508	-0.107377	NaN	0.0431615	-0.0260334	0.0341499	-0.223161	-0.17565	-0.237018	-0.116998	-0.430829	-0.0609634	-0.247419	-0.276129	-0.502303	-0.208164	-0.357804	-0.324139	-0.669982
+	+	0.0430044	2.17801	-0.117176	Q15274	Nicotinate-nucleotide pyrophosphorylase [carboxylating]	QPRT	202	GO:0006082;GO:0006139;GO:0006461;GO:0006732;GO:0006733;GO:0006753;GO:0006766;GO:0006767;GO:0006807;GO:0008152;GO:0009056;GO:0009058;GO:0009108;GO:0009117;GO:0009165;GO:0009435;GO:0009987;GO:0016043;GO:0016054;GO:0018130;GO:0019359;GO:0019362;GO:0019363;GO:0019674;GO:0019752;GO:0022607;GO:0034213;GO:0034641;GO:0034654;GO:0042180;GO:0043436;GO:0043648;GO:0043649;GO:0043933;GO:0044237;GO:0044238;GO:…	GO:0003824;GO:0004514;GO:0005488;GO:0005515;GO:0016740;GO:0016757;GO:0016763;GO:0042802;GO:0042803;GO:0046983	GO:0005737;GO:0005829;GO:0031982;GO:0031988;GO:0043226;GO:0043227;GO:0043230;GO:0044421;GO:0044424;GO:0044444;GO:0044464;GO:0065010;GO:0070062	VEVECSSLQEAVQAAEAGADLVLLDNFKPEELHPTATVLK	40	4	1	VEVEC[125.0477]SSLQEAVQAAEAGADLVLLDNFKPEELHPTATVLK	VEVEC[130.0791]SSLQEAVQAAEAGADLVLLDNFKPEELHPTATVLK	C	0.0714563	NaN	-0.0389295	0.3561	-0.135069	0.00638498	-0.0722571	NaN	-0.578583	0.0700765	0.0186666	-0.0377406	NaN	NaN	NaN	NaN	0.124737	0.385496	0.26915	NaN	NaN	0.414226	0.107795	0.389488	0.47826	NaN	0.309624	0.39973	NaN	0.273308	0.0901955
+	+	0.00128814	4.01152	-0.118418	P02730	Band 3 anion transport protein	SLC4A1	317	GO:0006810;GO:0006811;GO:0006820;GO:0006821;GO:0006873;GO:0006885;GO:0008152;GO:0009987;GO:0015698;GO:0015701;GO:0015711;GO:0019725;GO:0030003;GO:0030004;GO:0030641;GO:0042592;GO:0044281;GO:0048878;GO:0050801;GO:0051234;GO:0051453;GO:0055067;GO:0055080;GO:0055082;GO:0055085;GO:0065007;GO:0065008	GO:0005215;GO:0005452;GO:0005488;GO:0005515;GO:0008092;GO:0008509;GO:0015075;GO:0015103;GO:0015106;GO:0015108;GO:0015291;GO:0015297;GO:0015300;GO:0015301;GO:0022804;GO:0022857;GO:0022891;GO:0022892;GO:0030506;GO:0042802;GO:0042803;GO:0043495;GO:0046983	GO:0005856;GO:0005886;GO:0005887;GO:0016020;GO:0016021;GO:0016323;GO:0030018;GO:0030863;GO:0031224;GO:0031226;GO:0031982;GO:0031988;GO:0043226;GO:0043227;GO:0043228;GO:0043229;GO:0043230;GO:0043232;GO:0044421;GO:0044422;GO:0044424;GO:0044425;GO:0044444;GO:0044448;GO:0044449;GO:0044459;GO:0044464;GO:0065010;GO:0070062;GO:0072562	GELLHSLEGFLDCSLVLPPTDAPSEQALLSLVPVQR	36	3;4	1	GELLHSLEGFLDC[125.0477]SLVLPPTDAPSEQALLSLVPVQR	GELLHSLEGFLDC[130.0791]SLVLPPTDAPSEQALLSLVPVQR	C	0.524133	0.496316	0.454244	0.478788	0.311304	0.455949	0.301675	0.249497	0.311544	0.44657	0.435732	NaN	0.577493	0.688959	0.494391	0.546485	0.542777	0.514828	0.25998	0.339586	0.51305	0.570639	0.419488	0.0678738	0.614091	0.82285	0.345807	0.509275	0.0619883	0.475337	-0.0543471
+	+	0.000888889	4.1597	-0.119816	P30086	Phosphatidylethanolamine-binding protein 1	PEBP1	168		GO:0000166;GO:0004857;GO:0004866;GO:0004867;GO:0005488;GO:0005515;GO:0005524;GO:0005543;GO:0008289;GO:0008429;GO:0017076;GO:0019899;GO:0019900;GO:0019901;GO:0030234;GO:0030414;GO:0030554;GO:0032553;GO:0032555;GO:0032559;GO:0035639;GO:0061134;GO:0061135	GO:0005634;GO:0005737;GO:0031982;GO:0031988;GO:0043226;GO:0043227;GO:0043229;GO:0043230;GO:0043231;GO:0044421;GO:0044424;GO:0044464;GO:0065010;GO:0070062	APVAGTCYQAEWDDYVPK	18	2	1	APVAGTC[125.0477]YQAEWDDYVPK	APVAGTC[130.0791]YQAEWDDYVPK	C	-0.164482	-0.0627697	-0.0758019	0.00459836	-0.134784	0.00672585	-0.0690962	0.0637803	0.166699	-0.0590687	-0.0310835	0.185331	-0.0209787	0.173927	-0.0010339	0.0640507	0.0212431	0.163734	-0.0815741	-0.0166095	0.00669606	0.0610738	-0.14155	-0.198274	-0.227019	0.14361	-0.309966	0.0455342	-0.325618	-0.152274	-0.332777
	+	0.11756	1.56164	-0.122221	Q96IU4	Putative protein-lysine deacylase ABHD14B	ABHD14B	190	GO:0006355;GO:0006357;GO:0008152;GO:0009889;GO:0009891;GO:0009893;GO:0010468;GO:0010556;GO:0010557;GO:0010604;GO:0010628;GO:0019219;GO:0019222;GO:0031323;GO:0031325;GO:0031326;GO:0031328;GO:0045893;GO:0045935;GO:0045944;GO:0048518;GO:0048522;GO:0050789;GO:0050794;GO:0051171;GO:0051173;GO:0051252;GO:0051254;GO:0060255;GO:0065007;GO:0080090;GO:2000112	GO:0003824;GO:0016787	GO:0005634;GO:0005730;GO:0005737;GO:0005829;GO:0031982;GO:0031988;GO:0043226;GO:0043227;GO:0043228;GO:0043229;GO:0043230;GO:0043231;GO:0043232;GO:0044421;GO:0044422;GO:0044424;GO:0044428;GO:0044444;GO:0044446;GO:0044464;GO:0065010;GO:0070062	GAGHPCYLDKPEEWHTGLLDFLQGLQ	26	3;4	1	GAGHPC[125.0477]YLDKPEEWHTGLLDFLQGLQ	GAGHPC[130.0791]YLDKPEEWHTGLLDFLQGLQ	C	-0.0858966	NaN	0.433515	-0.0691799	0.161016	-0.0470911	0.105305	0.358018	NaN	0.385346	0.07211	NaN	-0.00177974	NaN	0.187439	0.237607	0.0898335	0.0820901	0.233365	NaN	NaN	NaN	-0.079802	0.318059	0.423507	0.464803	-0.379348	0.064187	-0.162802	0.401236	0.0217222
	+	0.0600755	1.98476	-0.126449	Q15149	Plectin	PLEC	4454	GO:0006915;GO:0006921;GO:0007044;GO:0008219;GO:0009987;GO:0012501;GO:0016043;GO:0016265;GO:0022411;GO:0022607;GO:0030198;GO:0031581;GO:0034329;GO:0034330;GO:0043062;GO:0071840;GO:0071841;GO:0071842;GO:0071844;GO:0071845	GO:0005198;GO:0005488;GO:0005515;GO:0008092;GO:0008307;GO:0030506	GO:0005737;GO:0005829;GO:0005856;GO:0005886;GO:0005912;GO:0005924;GO:0005925;GO:0016020;GO:0016528;GO:0030054;GO:0030055;GO:0030056;GO:0031982;GO:0031988;GO:0042383;GO:0043034;GO:0043226;GO:0043227;GO:0043228;GO:0043229;GO:0043230;GO:0043232;GO:0044421;GO:0044422;GO:0044424;GO:0044444;GO:0044449;GO:0044464;GO:0045111;GO:0065010;GO:0070062;GO:0070161	LLEAQACTGGIIDPSTGER	19	2	1	LLEAQAC[125.0477]TGGIIDPSTGER	LLEAQAC[130.0791]TGGIIDPSTGER	C	-1.11351	NaN	-0.425663	NaN	-0.425396	-0.0811182	-0.509317	-0.438744	-0.233939	-0.552382	-0.355727	-0.228147	-0.223632	-0.113699	-0.212779	-0.131679	-0.318794	-0.0307527	-0.192273	NaN	NaN	-0.367167	-0.641684	-0.460321	-0.543409	0.131702	-0.592043	-0.299046	-0.133318	-0.323956	-0.737973
	+	0.146125	1.41108	-0.129471	Q9P000	COMM domain-containing protein 9	COMMD9	47	GO:0006139;GO:0006351;GO:0006355;GO:0006807;GO:0006810;GO:0006811;GO:0006812;GO:0006814;GO:0008152;GO:0009058;GO:0009059;GO:0009889;GO:0009987;GO:0010468;GO:0010556;GO:0015672;GO:0016070;GO:0019219;GO:0019222;GO:0030001;GO:0031323;GO:0031326;GO:0032774;GO:0034641;GO:0034645;GO:0043170;GO:0044237;GO:0044238;GO:0044249;GO:0044260;GO:0050789;GO:0050794;GO:0051171;GO:0051234;GO:0051252;GO:0060255;GO:…		GO:0005634;GO:0016023;GO:0031410;GO:0031982;GO:0031988;GO:0043226;GO:0043227;GO:0043229;GO:0043231;GO:0044424;GO:0044444;GO:0044464	KLLDVTCSSLSVTQEEAEELLQALHR	26	4	1	KLLDVTC[125.0477]SSLSVTQEEAEELLQALHR	KLLDVTC[130.0791]SSLSVTQEEAEELLQALHR	C	0.106969	NaN	0.308772	0.441896	0.149015	0.209438	0.00121833	-0.00866898	-0.282216	0.0980036	0.110362	0.600083	NaN	-0.216129	0.0822015	-0.235461	-0.177051	0.238345	NaN	NaN	NaN	0.0990349	0.275738	0.289041	0.0162305	0.254121	NaN	0.0801533	-0.319375	NaN	0.19529
	+	0.101175	1.65252	-0.132871	O75348	V-type proton ATPase subunit G 1	ATP6V1G1	69	GO:0000041;GO:0006810;GO:0006811;GO:0006812;GO:0006826;GO:0006873;GO:0006875;GO:0006879;GO:0006996;GO:0007165;GO:0007166;GO:0007167;GO:0007169;GO:0008286;GO:0009719;GO:0009725;GO:0009987;GO:0010033;GO:0015031;GO:0015682;GO:0016043;GO:0019725;GO:0030001;GO:0030003;GO:0032868;GO:0032869;GO:0032870;GO:0033572;GO:0034220;GO:0042221;GO:0042592;GO:0043434;GO:0044419;GO:0045184;GO:0048878;GO:0050789;GO:…	GO:0003824;GO:0005215;GO:0005488;GO:0005515;GO:0008324;GO:0008553;GO:0015075;GO:0015077;GO:0015078;GO:0015399;GO:0015405;GO:0015662;GO:0016462;GO:0016787;GO:0016817;GO:0016818;GO:0016820;GO:0016887;GO:0017111;GO:0019899;GO:0022804;GO:0022857;GO:0022890;GO:0022891;GO:0022892;GO:0042623;GO:0042625;GO:0042626;GO:0043492;GO:0051117	GO:0005765;GO:0005774;GO:0005829;GO:0005886;GO:0016020;GO:0016469;GO:0016471;GO:0031090;GO:0031982;GO:0031988;GO:0032991;GO:0033176;GO:0043226;GO:0043227;GO:0043230;GO:0043234;GO:0044421;GO:0044422;GO:0044424;GO:0044425;GO:0044437;GO:0044444;GO:0044446;GO:0044464;GO:0065010;GO:0070062	EAAALGSRGSCSTEVEKETQEK	22	4	1	EAAALGSRGSC[125.0477]STEVEKETQEK	EAAALGSRGSC[130.0791]STEVEKETQEK	C	-0.261519	NaN	0.0438799	0.0309094	-0.253438	0.0576084	-0.375733	-0.227224	-0.230802	0.174375	-0.0558592	0.134454	0.198429	0.307545	0.0293208	0.29328	-0.669903	0.263556	0.0295386	NaN	0.0935584	0.0209391	-0.699984	0.366431	0.30207	0.498868	-0.433928	0.422432	-0.487958	0.11354	-0.522048
	+	0.128257	1.50368	-0.134033	P04075	Fructose-bisphosphate aldolase A	ALDOA	339	GO:0001775;GO:0002576;GO:0003008;GO:0003012;GO:0005975;GO:0005996;GO:0006000;GO:0006006;GO:0006007;GO:0006066;GO:0006091;GO:0006094;GO:0006096;GO:0006139;GO:0006163;GO:0006164;GO:0006461;GO:0006753;GO:0006754;GO:0006807;GO:0006810;GO:0006887;GO:0006936;GO:0006941;GO:0006996;GO:0007010;GO:0007015;GO:0007596;GO:0007599;GO:0008152;GO:0008360;GO:0009056;GO:0009058;GO:0009117;GO:0009141;GO:0009142;GO:…	GO:0003779;GO:0003824;GO:0004332;GO:0005488;GO:0005515;GO:0005529;GO:0008092;GO:0015631;GO:0016829;GO:0016830;GO:0016832;GO:0030246;GO:0042802;GO:0048029;GO:0070061	GO:0005576;GO:0005615;GO:0005634;GO:0005829;GO:0005856;GO:0015629;GO:0016020;GO:0031093;GO:0031430;GO:0031674;GO:0031974;GO:0031982;GO:0031983;GO:0031988;GO:0034774;GO:0043226;GO:0043227;GO:0043228;GO:0043229;GO:0043230;GO:0043231;GO:0043232;GO:0043233;GO:0044421;GO:0044422;GO:0044424;GO:0044433;GO:0044444;GO:0044446;GO:0044449;GO:0044464;GO:0060205;GO:0065010;GO:0070062	ALANSLACQGK	11	2	1	ALANSLAC[125.0477]QGK	ALANSLAC[130.0791]QGK	C	-1.19978	-1.19877	-1.04721	-0.918759	-1.21863	-0.981432	-1.07361	-0.762695	-0.939759	-1.36333	-1.08191	-0.7035	-1.08735	-0.600856	-0.761107	-0.909114	-1.38116	-0.801453	-0.982168	-1.25785	NaN	-1.62267	-1.51465	-0.859914	-1.16067	-0.779549	-1.2936	-1.20291	-1.46451	-1.34434	-1.4157
	+	0.173618	1.31205	-0.135169	O43707	Alpha-actinin-4	ACTN4	499	GO:0001666;GO:0001775;GO:0002028;GO:0002576;GO:0006810;GO:0006887;GO:0006950;GO:0006996;GO:0007010;GO:0007015;GO:0007043;GO:0007165;GO:0007596;GO:0007599;GO:0009987;GO:0010155;GO:0010941;GO:0010959;GO:0015031;GO:0016043;GO:0016192;GO:0022607;GO:0022898;GO:0030029;GO:0030036;GO:0030100;GO:0030168;GO:0030522;GO:0032409;GO:0032411;GO:0032412;GO:0032414;GO:0032415;GO:0032417;GO:0032501;GO:0032879;GO:…	GO:0000988;GO:0000989;GO:0001882;GO:0003712;GO:0003713;GO:0003779;GO:0005102;GO:0005178;GO:0005488;GO:0005509;GO:0005515;GO:0008092;GO:0008134;GO:0030374;GO:0032403;GO:0035257;GO:0042802;GO:0042803;GO:0042974;GO:0043167;GO:0043169;GO:0046872;GO:0046983;GO:0051015;GO:0051427	GO:0001725;GO:0005576;GO:0005615;GO:0005634;GO:0005737;GO:0005856;GO:0005911;GO:0005912;GO:0005924;GO:0005925;GO:0030018;GO:0030054;GO:0030055;GO:0030529;GO:0030863;GO:0031093;GO:0031143;GO:0031974;GO:0031982;GO:0031983;GO:0031988;GO:0032432;GO:0032991;GO:0034774;GO:0042641;GO:0042995;GO:0043005;GO:0043226;GO:0043227;GO:0043228;GO:0043229;GO:0043230;GO:0043231;GO:0043232;GO:0043233;GO:0043234;GO:…	ICDQWDALGSLTHSR	15	2;3	1	IC[125.0477]DQWDALGSLTHSR	IC[130.0791]DQWDALGSLTHSR	C	0.0529327	-3.15154	0.257047	-0.168008	-0.168976	0.0105455	0.186172	0.31052	0.257724	0.0729546	-0.111699	0.420362	0.117025	0.381312	-0.0132632	0.248838	-0.159471	0.435614	0.0694076	-0.655853	-0.0447739	0.336418	-0.365401	-0.460237	-0.11955	0.212489	-0.0855695	-0.43933	-0.230276	-0.185924	-0.59544
	+	0.102122	1.64122	-0.13647	Q9NPH2	Inositol-3-phosphate synthase 1	ISYNA1	443	GO:0005975;GO:0006020;GO:0006021;GO:0006066;GO:0006629;GO:0006644;GO:0008152;GO:0008610;GO:0008654;GO:0009058;GO:0009987;GO:0016051;GO:0019637;GO:0019751;GO:0034637;GO:0043647;GO:0044237;GO:0044238;GO:0044249;GO:0044255;GO:0044262;GO:0044281;GO:0044283;GO:0046165;GO:0046173	GO:0003824;GO:0004512;GO:0016853;GO:0016872	GO:0005829;GO:0044424;GO:0044444;GO:0044464	VSFCTDMDPEPQTFHPVLSLLSFLFK	26	3	1	VSFC[125.0477]TDMDPEPQTFHPVLSLLSFLFK	VSFC[130.0791]TDMDPEPQTFHPVLSLLSFLFK	C	NaN	NaN	0.33569	0.617286	0.311126	0.64882	NaN	NaN	NaN	0.435223	NaN	NaN	NaN	0.421786	NaN	NaN	NaN	0.852233	NaN	NaN	NaN	NaN	0.395009	NaN	0.524802	0.63257	NaN	0.639725	0.192961	NaN	0.423772
	+	0.0510916	2.06831	-0.138886	Q9Y305	Acyl-coenzyme A thioesterase 9, mitochondrial	ACOT9	128	GO:0006637;GO:0006732;GO:0008152;GO:0009987;GO:0035383;GO:0044237;GO:0051186	GO:0003824;GO:0003986;GO:0016289;GO:0016787;GO:0016788;GO:0016790;GO:0052689	GO:0005739;GO:0043226;GO:0043227;GO:0043229;GO:0043231;GO:0044424;GO:0044444;GO:0044464	ILEDLDSLGVLICYMHNK	18	3	1	ILEDLDSLGVLIC[125.0477]YMHNK	ILEDLDSLGVLIC[130.0791]YMHNK	C	NaN	NaN	-0.077545	NaN	NaN	NaN	NaN	NaN	NaN	NaN	NaN	NaN	-0.219453	0.0659083	-0.0551387	0.216323	-0.00373341	0.242687	0.168173	NaN	NaN	NaN	0.036294	NaN	-0.0162096	0.515799	-0.0362986	0.0352344	0.0356299	NaN	-0.377104
+	+	0.00210526	3.74068	-0.142362	P00441	Superoxide dismutase [Cu-Zn]	SOD1	112	GO:0000187;GO:0000302;GO:0000303;GO:0000305;GO:0001541;GO:0001775;GO:0001817;GO:0001819;GO:0001890;GO:0001894;GO:0001895;GO:0001932;GO:0001975;GO:0002262;GO:0002376;GO:0002576;GO:0002682;GO:0002694;GO:0003008;GO:0003012;GO:0003013;GO:0003015;GO:0006082;GO:0006140;GO:0006464;GO:0006468;GO:0006518;GO:0006520;GO:0006575;GO:0006749;GO:0006790;GO:0006793;GO:0006796;GO:0006801;GO:0006807;GO:0006810;GO:…	GO:0003824;GO:0004784;GO:0005488;GO:0005507;GO:0005515;GO:0008270;GO:0016209;GO:0016491;GO:0016721;GO:0017016;GO:0017048;GO:0019899;GO:0019902;GO:0019903;GO:0030346;GO:0031267;GO:0042802;GO:0042803;GO:0043167;GO:0043169;GO:0046872;GO:0046914;GO:0046983;GO:0048365;GO:0051020;GO:0051087	GO:0005576;GO:0005615;GO:0005634;GO:0005654;GO:0005737;GO:0005739;GO:0005758;GO:0005759;GO:0005777;GO:0005829;GO:0016023;GO:0030141;GO:0031012;GO:0031045;GO:0031410;GO:0031970;GO:0031974;GO:0031982;GO:0031988;GO:0032838;GO:0032839;GO:0032991;GO:0042579;GO:0043025;GO:0043226;GO:0043227;GO:0043229;GO:0043230;GO:0043231;GO:0043233;GO:0043234;GO:0044297;GO:0044421;GO:0044422;GO:0044424;GO:0044428;GO:…	HVGDLGNVTADKDGVADVSIEDSVISLSGDHCIIGR	36	3;4;5	1	HVGDLGNVTADKDGVADVSIEDSVISLSGDHC[125.0477]IIGR	HVGDLGNVTADKDGVADVSIEDSVISLSGDHC[130.0791]IIGR	C	0.394687	-0.504947	0.687303	0.640307	0.211633	0.331344	0.363078	0.619822	0.236428	0.313978	0.481124	0.868883	0.876744	0.727658	0.349029	0.564881	0.449164	0.73442	0.341296	0.286954	0.369613	0.678777	0.128542	0.52402	0.297011	0.448295	0.406301	0.407455	0.218482	0.248811	0.194475
	+	0.138714	1.4545	-0.1435	Q15942	Zyxin	ZYX	492	GO:0006996;GO:0007010;GO:0007015;GO:0007154;GO:0007155;GO:0007160;GO:0007165;GO:0007166;GO:0007167;GO:0007178;GO:0007179;GO:0007229;GO:0007267;GO:0009987;GO:0016032;GO:0016043;GO:0022607;GO:0022610;GO:0023052;GO:0030029;GO:0030036;GO:0031347;GO:0031589;GO:0032101;GO:0043149;GO:0048583;GO:0050727;GO:0050789;GO:0050794;GO:0050896;GO:0051017;GO:0051716;GO:0065007;GO:0071840;GO:0071841;GO:0071842;GO:…	GO:0005488;GO:0008270;GO:0043167;GO:0043169;GO:0046872;GO:0046914	GO:0001725;GO:0005634;GO:0005737;GO:0005886;GO:0005887;GO:0005911;GO:0005912;GO:0005913;GO:0005924;GO:0005925;GO:0016020;GO:0016021;GO:0030054;GO:0030055;GO:0031224;GO:0031226;GO:0032432;GO:0042641;GO:0043226;GO:0043227;GO:0043229;GO:0043231;GO:0044422;GO:0044424;GO:0044425;GO:0044430;GO:0044446;GO:0044459;GO:0044464;GO:0070161	PLEGTSFIVDQANRPHCVPDYHK	23	3;4	1	PLEGTSFIVDQANRPHC[125.0477]VPDYHK	PLEGTSFIVDQANRPHC[130.0791]VPDYHK	C	-0.415154	NaN	0.50576	-0.272543	-0.15601	0.214947	-0.206777	0.108337	0.0416264	-0.529575	0.486255	0.0763149	NaN	0.493507	0.266647	0.22693	-0.429856	-0.305946	-0.49434	NaN	-0.393897	-0.333962	-0.4646	-0.144781	-0.379809	0.238357	-0.331737	-0.583914	-0.871514	-1.17155	-1.40927
	+	0.166429	1.33884	-0.150145	Q16775	Hydroxyacylglutathione hydrolase, mitochondrial	HAGH	201	GO:0006082;GO:0006518;GO:0006520;GO:0006575;GO:0006749;GO:0006750;GO:0006790;GO:0006807;GO:0008152;GO:0008652;GO:0009058;GO:0009308;GO:0009309;GO:0009987;GO:0016053;GO:0019752;GO:0034641;GO:0042180;GO:0042398;GO:0043043;GO:0043436;GO:0044106;GO:0044237;GO:0044238;GO:0044249;GO:0044271;GO:0044272;GO:0044281;GO:0044283;GO:0046394	GO:0003824;GO:0004416;GO:0005488;GO:0008270;GO:0016787;GO:0016788;GO:0016790;GO:0043167;GO:0043169;GO:0046872;GO:0046914	GO:0005737;GO:0005759;GO:0031974;GO:0031982;GO:0031988;GO:0043226;GO:0043227;GO:0043230;GO:0043233;GO:0044421;GO:0044422;GO:0044424;GO:0044429;GO:0044444;GO:0044446;GO:0044464;GO:0065010;GO:0070013;GO:0070062	FYEGTADEMCK	11	2	1	FYEGTADEMC[125.0477]K	FYEGTADEMC[130.0791]K	C	1.42365	NaN	1.53109	NaN	1.2592	NaN	1.0379	1.55984	1.3088	2.04556	1.07828	2.46711	NaN	NaN	1.31244	1.50674	1.44625	1.24265	1.51976	1.55769	NaN	NaN	NaN	1.58345	1.43978	1.87117	0.907565	1.38863	1.35179	NaN	0.99328
+	+	0.0431542	2.17431	-0.150481	O75348	V-type proton ATPase subunit G 1	ATP6V1G1	104	GO:0000041;GO:0006810;GO:0006811;GO:0006812;GO:0006826;GO:0006873;GO:0006875;GO:0006879;GO:0006996;GO:0007165;GO:0007166;GO:0007167;GO:0007169;GO:0008286;GO:0009719;GO:0009725;GO:0009987;GO:0010033;GO:0015031;GO:0015682;GO:0016043;GO:0019725;GO:0030001;GO:0030003;GO:0032868;GO:0032869;GO:0032870;GO:0033572;GO:0034220;GO:0042221;GO:0042592;GO:0043434;GO:0044419;GO:0045184;GO:0048878;GO:0050789;GO:…	GO:0003824;GO:0005215;GO:0005488;GO:0005515;GO:0008324;GO:0008553;GO:0015075;GO:0015077;GO:0015078;GO:0015399;GO:0015405;GO:0015662;GO:0016462;GO:0016787;GO:0016817;GO:0016818;GO:0016820;GO:0016887;GO:0017111;GO:0019899;GO:0022804;GO:0022857;GO:0022890;GO:0022891;GO:0022892;GO:0042623;GO:0042625;GO:0042626;GO:0043492;GO:0051117	GO:0005765;GO:0005774;GO:0005829;GO:0005886;GO:0016020;GO:0016469;GO:0016471;GO:0031090;GO:0031982;GO:0031988;GO:0032991;GO:0033176;GO:0043226;GO:0043227;GO:0043230;GO:0043234;GO:0044421;GO:0044422;GO:0044424;GO:0044425;GO:0044437;GO:0044444;GO:0044446;GO:0044464;GO:0065010;GO:0070062	DEVLDNLLAFVCDIRPEIHENYR	23	3	1	DEVLDNLLAFVC[125.0477]DIRPEIHENYR	DEVLDNLLAFVC[130.0791]DIRPEIHENYR	C	0.690216	NaN	0.531692	0.687442	0.0179697	0.70524	0.412129	0.709106	NaN	0.647054	0.674778	NaN	0.863312	0.441122	NaN	0.489574	-0.0168288	0.925929	0.74159	NaN	0.74881	0.968873	0.522221	0.482476	0.50309	0.743018	0.611232	0.597473	0.606176	0.585831	0.564383
	+	0.0878486	1.75427	-0.1529	A0A0B4J2D5	Putative glutamine amidotransferase-like class 1 domain-containing protein 3B, mitochondrial	GATD3B	244				NKVVTTPAFMCETALHYIHDGIGAMVR	27	4	1	NKVVTTPAFMC[125.0477]ETALHYIHDGIGAMVR	NKVVTTPAFMC[130.0791]ETALHYIHDGIGAMVR	C	0.0755612	NaN	-0.459817	-0.137421	NaN	0.0416518	NaN	-0.30462	NaN	-0.461327	0.216731	0.030672	-0.750568	0.115013	NaN	0.229457	-0.220214	0.144308	0.262425	NaN	-0.296598	0.157048	-0.672325	-0.107737	-0.590681	-0.190318	0.520395	-0.299188	NaN	-0.87669	-0.303556
	+	0.146475	1.41189	-0.155132	O15247	Chloride intracellular channel protein 2	CLIC2	229	GO:0006810;GO:0006937;GO:0006942;GO:0007165;GO:0008016;GO:0008152;GO:0009987;GO:0010522;GO:0010880;GO:0010881;GO:0010882;GO:0010959;GO:0019722;GO:0019932;GO:0022898;GO:0032386;GO:0032409;GO:0032410;GO:0032412;GO:0032413;GO:0032844;GO:0032879;GO:0034762;GO:0034765;GO:0035556;GO:0043269;GO:0044057;GO:0044092;GO:0044093;GO:0048519;GO:0050789;GO:0050794;GO:0050896;GO:0051049;GO:0051051;GO:0051098;GO:…	GO:0003824;GO:0004601;GO:0004602;GO:0005215;GO:0005216;GO:0005244;GO:0005253;GO:0005254;GO:0008509;GO:0015075;GO:0015267;GO:0016209;GO:0016491;GO:0016684;GO:0022803;GO:0022832;GO:0022836;GO:0022838;GO:0022857;GO:0022891;GO:0022892	GO:0005622;GO:0005634;GO:0005737;GO:0032991;GO:0034702;GO:0034707;GO:0043226;GO:0043227;GO:0043229;GO:0043231;GO:0043234;GO:0044424;GO:0044425;GO:0044464	EEFTHTCPEDKEIENTYANVAK	22	3;4	1	EEFTHTC[125.0477]PEDKEIENTYANVAK	EEFTHTC[130.0791]PEDKEIENTYANVAK	C	0.338003	NaN	0.654907	0.374707	0.6251	0.954344	0.530213	NaN	1.83869	NaN	0.787535	NaN	NaN	NaN	0.880154	NaN	0.5532	NaN	1.28623	NaN	0.933073	1.02752	1.09872	NaN	0.565078	NaN	0.801221	NaN	0.462705	NaN	0.390338
	+	0.120598	1.54585	-0.155617	P30101	Protein disulfide-isomerase A3	PDIA3	244	GO:0002376;GO:0002474;GO:0002478;GO:0002479;GO:0005975;GO:0006457;GO:0006464;GO:0006486;GO:0006487;GO:0006508;GO:0006605;GO:0006606;GO:0006621;GO:0006810;GO:0006886;GO:0006913;GO:0006950;GO:0007165;GO:0008152;GO:0009987;GO:0015031;GO:0017038;GO:0018193;GO:0018196;GO:0018279;GO:0019538;GO:0019725;GO:0019882;GO:0019884;GO:0032507;GO:0033554;GO:0034975;GO:0034976;GO:0035437;GO:0042590;GO:0042592;GO:…	GO:0003756;GO:0003824;GO:0004175;GO:0004197;GO:0004620;GO:0004629;GO:0008081;GO:0008233;GO:0008234;GO:0015036;GO:0016298;GO:0016491;GO:0016667;GO:0016787;GO:0016788;GO:0016853;GO:0016860;GO:0016862;GO:0016864;GO:0042578;GO:0070011	GO:0005634;GO:0005783;GO:0005788;GO:0005790;GO:0005912;GO:0005924;GO:0005925;GO:0009986;GO:0016023;GO:0030054;GO:0030055;GO:0031410;GO:0031974;GO:0031982;GO:0031988;GO:0042470;GO:0043226;GO:0043227;GO:0043229;GO:0043230;GO:0043231;GO:0043233;GO:0044421;GO:0044422;GO:0044424;GO:0044432;GO:0044444;GO:0044446;GO:0044464;GO:0048770;GO:0065010;GO:0070013;GO:0070062;GO:0070161	FIQENIFGICPHMTEDNK	18	3	1	FIQENIFGIC[125.0477]PHMTEDNK	FIQENIFGIC[130.0791]PHMTEDNK	C	-1.43383	NaN	-1.23301	-0.481172	-1.08019	-0.541419	-0.719917	0.520003	-0.0161055	-0.964733	-0.824353	-0.415591	-0.525614	-0.507852	-0.756211	-0.348555	-1.30845	-0.735865	-0.993497	-1.04487	NaN	-0.719491	-0.694985	-0.649093	-1.3142	-0.492881	-0.930834	-2.32008	-1.37025	-1.1828	-1.1028
	+	0.118518	1.55481	-0.156763	P23610	40-kDa huntingtin-associated protein	F8A3	190			GO:0005634;GO:0043226;GO:0043227;GO:0043229;GO:0043231;GO:0044424;GO:0044464	AAQLQLPQLPLAALQALGEAASCQLLAR	28	3	1	AAQLQLPQLPLAALQALGEAASC[125.0477]QLLAR	AAQLQLPQLPLAALQALGEAASC[130.0791]QLLAR	C	-0.709044	NaN	-1.02208	-0.632602	-0.683064	-0.940686	NaN	NaN	NaN	-0.836501	NaN	-0.643524	NaN	-0.479525	NaN	-0.317572	-0.293999	-0.497265	NaN	NaN	NaN	-0.621397	-0.866532	-0.682877	-1.18236	-0.478788	NaN	NaN	NaN	NaN	NaN
+	+	0.0112239	2.92871	-0.158881	P00492	Hypoxanthine-guanine phosphoribosyltransferase	HPRT1	23	GO:0001775;GO:0001975;GO:0002376;GO:0006066;GO:0006139;GO:0006144;GO:0006163;GO:0006164;GO:0006166;GO:0006168;GO:0006177;GO:0006178;GO:0006188;GO:0006195;GO:0006461;GO:0006576;GO:0006584;GO:0006725;GO:0006753;GO:0006807;GO:0007610;GO:0007625;GO:0007626;GO:0008152;GO:0008219;GO:0008283;GO:0009056;GO:0009058;GO:0009112;GO:0009113;GO:0009116;GO:0009117;GO:0009119;GO:0009123;GO:0009124;GO:0009125;GO:…	GO:0000166;GO:0000287;GO:0003824;GO:0004422;GO:0005488;GO:0005515;GO:0016740;GO:0016757;GO:0016763;GO:0042802;GO:0042803;GO:0043167;GO:0043169;GO:0046872;GO:0046983;GO:0052657	GO:0005737;GO:0005829;GO:0031982;GO:0031988;GO:0043226;GO:0043227;GO:0043230;GO:0044421;GO:0044424;GO:0044444;GO:0044464;GO:0065010;GO:0070062	SPGVVISDDEPGYDLDLFCIPNHYAEDLER	30	3	1	SPGVVISDDEPGYDLDLFC[125.0477]IPNHYAEDLER	SPGVVISDDEPGYDLDLFC[130.0791]IPNHYAEDLER	C	1.29227	NaN	1.19031	NaN	1.29633	1.29405	1.19853	0.973591	1.22091	1.21661	1.29439	NaN	1.34471	1.38928	1.17694	1.20187	1.05479	1.7062	1.46024	1.10795	NaN	1.46314	0.689811	NaN	1.59007	1.0245	0.824656	0.86112	1.34814	1.12812	1.42961
	+	0.16654	1.33598	-0.160157	Q9UNS2	COP9 signalosome complex subunit 3	COPS3	104	GO:0000338;GO:0001701;GO:0006464;GO:0006508;GO:0006511;GO:0007165;GO:0008152;GO:0009056;GO:0009057;GO:0009314;GO:0009416;GO:0009628;GO:0009790;GO:0009792;GO:0009987;GO:0010388;GO:0019538;GO:0019941;GO:0032502;GO:0043009;GO:0043170;GO:0043412;GO:0043632;GO:0044237;GO:0044238;GO:0044248;GO:0044260;GO:0044265;GO:0044267;GO:0050789;GO:0050794;GO:0050896;GO:0051603;GO:0051716;GO:0065007;GO:0070646;GO:…		GO:0005634;GO:0005654;GO:0005737;GO:0008180;GO:0032991;GO:0043226;GO:0043227;GO:0043229;GO:0043231;GO:0043234;GO:0044422;GO:0044424;GO:0044428;GO:0044446;GO:0044464	YATDTFAGLCHQLTNALVER	20	3	1	YATDTFAGLC[125.0477]HQLTNALVER	YATDTFAGLC[130.0791]HQLTNALVER	C	-0.177327	NaN	-0.0937602	-0.504655	NaN	-0.328645	-0.400664	-0.173605	NaN	-0.167018	-0.58074	-0.421887	-0.0660665	0.173262	NaN	0.0405951	-0.419883	0.0612294	NaN	NaN	NaN	NaN	-0.139261	NaN	-0.790921	0.147828	NaN	-0.173192	-0.735454	NaN	-0.618464
+	+	0.00601905	3.2521	-0.162782	O00410	Importin-5	IPO5	1078	GO:0001101;GO:0006140;GO:0006605;GO:0006606;GO:0006607;GO:0006610;GO:0006810;GO:0006886;GO:0006913;GO:0009719;GO:0009894;GO:0009987;GO:0010033;GO:0010243;GO:0014075;GO:0015031;GO:0016032;GO:0017038;GO:0019219;GO:0019222;GO:0030811;GO:0031323;GO:0031329;GO:0032386;GO:0032388;GO:0032879;GO:0032880;GO:0033121;GO:0033124;GO:0033157;GO:0034260;GO:0034762;GO:0034764;GO:0042221;GO:0042306;GO:0042307;GO:…	GO:0004857;GO:0005095;GO:0005215;GO:0005488;GO:0005515;GO:0008536;GO:0008565;GO:0017016;GO:0019899;GO:0022892;GO:0030234;GO:0030695;GO:0031267;GO:0051020;GO:0060589	GO:0005634;GO:0005643;GO:0005654;GO:0005730;GO:0005737;GO:0005794;GO:0016020;GO:0031090;GO:0031965;GO:0032991;GO:0043226;GO:0043227;GO:0043228;GO:0043229;GO:0043231;GO:0043232;GO:0043234;GO:0044422;GO:0044424;GO:0044425;GO:0044428;GO:0044444;GO:0044446;GO:0044464;GO:0046930	QVQTSGGLWTECIAQLSPEQQAAIQELLNSA	31	3	1	QVQTSGGLWTEC[125.0477]IAQLSPEQQAAIQELLNSA	QVQTSGGLWTEC[130.0791]IAQLSPEQQAAIQELLNSA	C	NaN	NaN	NaN	0.277715	NaN	NaN	NaN	NaN	NaN	0.190009	NaN	NaN	NaN	0.205462	NaN	0.158054	NaN	NaN	NaN	NaN	NaN	NaN	-0.0754695	NaN	-0.307464	0.126304	NaN	0.254287	NaN	0.287354	-0.117514
	+	0.101719	1.6485	-0.170619	P21397	Amine oxidase [flavin-containing] A	MAOA	266	GO:0001505;GO:0006066;GO:0006576;GO:0006584;GO:0006725;GO:0006805;GO:0006807;GO:0006810;GO:0006836;GO:0007154;GO:0007267;GO:0007268;GO:0007269;GO:0008152;GO:0009056;GO:0009058;GO:0009308;GO:0009310;GO:0009712;GO:0009987;GO:0018958;GO:0019614;GO:0023052;GO:0023061;GO:0032940;GO:0034311;GO:0034313;GO:0034641;GO:0042133;GO:0042135;GO:0042136;GO:0042402;GO:0042417;GO:0042420;GO:0042424;GO:0042537;GO:…	GO:0003824;GO:0008131;GO:0016491;GO:0016638;GO:0016641	GO:0005739;GO:0005741;GO:0016020;GO:0016021;GO:0019867;GO:0031090;GO:0031224;GO:0031966;GO:0031968;GO:0043226;GO:0043227;GO:0043229;GO:0043231;GO:0044422;GO:0044424;GO:0044425;GO:0044429;GO:0044444;GO:0044446;GO:0044464	LNHPVTHVDQSSDNIIIETLNHEHYECK	28	3;4;5	1	LNHPVTHVDQSSDNIIIETLNHEHYEC[125.0477]K	LNHPVTHVDQSSDNIIIETLNHEHYEC[130.0791]K	C	1.09922	NaN	0.677514	0.792661	NaN	NaN	0.969216	NaN	1.50144	NaN	1.17856	NaN	1.31277	1.79153	1.52309	1.16686	1.11052	1.15415	1.36676	NaN	1.78994	2.22781	1.43466	1.69312	1.63528	1.1114	1.81029	1.46821	1.25183	NaN	0.795784
	+	0.0710241	1.87758	-0.175626	P00450	Ceruloplasmin	CP	240	GO:0000041;GO:0006810;GO:0006811;GO:0006812;GO:0006825;GO:0006873;GO:0006875;GO:0006879;GO:0009987;GO:0019725;GO:0030001;GO:0030003;GO:0042592;GO:0048878;GO:0050801;GO:0051234;GO:0055065;GO:0055072;GO:0055080;GO:0055082;GO:0055085;GO:0065007;GO:0065008	GO:0003824;GO:0004322;GO:0005488;GO:0005507;GO:0005515;GO:0016491;GO:0016722;GO:0016724;GO:0043167;GO:0043169;GO:0046872;GO:0046914;GO:0051087	GO:0005576;GO:0005615;GO:0005765;GO:0005774;GO:0016020;GO:0031090;GO:0031982;GO:0031988;GO:0043226;GO:0043227;GO:0043230;GO:0044421;GO:0044422;GO:0044424;GO:0044437;GO:0044444;GO:0044446;GO:0044464;GO:0065010;GO:0070062;GO:0072562	TYCSEPEK	21	2;3;4	1	TYC[125.0477]SEPEKVDKDNEDFQESNR	TYC[130.0791]SEPEKVDKDNEDFQESNR	C	0.739126	0.78142	0.765569	NaN	1.11728	0.921878	0.720071	1.1614	0.76096	0.416514	0.697861	0.931577	0.607881	0.847091	1.08453	1.24786	0.661673	1.0909	0.510958	0.881184	1.50713	0.698925	0.792171	1.21842	0.929761	1.84378	0.639873	0.551477	0.572731	0.538921	0.55961
	+	0.123959	1.53276	-0.176429	P30043	Flavin reductase (NADPH)	BLVRB	109	GO:0006778;GO:0006787;GO:0006807;GO:0008152;GO:0009056;GO:0009987;GO:0033013;GO:0033015;GO:0034641;GO:0042167;GO:0042168;GO:0042440;GO:0044237;GO:0044248;GO:0044270;GO:0044281;GO:0046149;GO:0046483;GO:0046700;GO:0051186;GO:0051187	GO:0003824;GO:0004074;GO:0016491;GO:0016627;GO:0016628;GO:0016645;GO:0016646;GO:0042602	GO:0005654;GO:0005737;GO:0005829;GO:0005886;GO:0016020;GO:0031982;GO:0031988;GO:0043226;GO:0043227;GO:0043230;GO:0044421;GO:0044422;GO:0044424;GO:0044428;GO:0044444;GO:0044446;GO:0044464;GO:0065010;GO:0070062	AHGVDKVVACTSAFLLWDPTKVPPR	25	3	1	AHGVDKVVAC[125.0477]TSAFLLWDPTKVPPR	AHGVDKVVAC[130.0791]TSAFLLWDPTKVPPR	C	-1.38595	NaN	-0.86079	-0.575803	-0.728564	-0.523108	-0.782636	-0.706486	NaN	-0.478021	-0.943427	NaN	NaN	0.430698	-0.64224	-0.4471	-0.947746	0.275704	-0.935775	-0.362401	NaN	NaN	-0.922925	-0.246284	-0.756549	-1.18633	-1.46273	NaN	-0.942156	-0.730473	NaN
+	+	0.0447273	2.15395	-0.180125	P49773	Adenosine 5'-monophosphoramidase HINT1	HINT1	38	GO:0006139;GO:0006163;GO:0006195;GO:0006351;GO:0006355;GO:0006753;GO:0006807;GO:0006917;GO:0007165;GO:0008152;GO:0008629;GO:0009056;GO:0009058;GO:0009059;GO:0009117;GO:0009150;GO:0009154;GO:0009166;GO:0009259;GO:0009261;GO:0009889;GO:0009987;GO:0010468;GO:0010556;GO:0010941;GO:0010942;GO:0012502;GO:0016070;GO:0019219;GO:0019222;GO:0031323;GO:0031326;GO:0032774;GO:0034641;GO:0034645;GO:0034655;GO:…	GO:0000166;GO:0003824;GO:0005080;GO:0005488;GO:0005515;GO:0016787;GO:0019899;GO:0019900;GO:0019901	GO:0000118;GO:0005634;GO:0005737;GO:0005856;GO:0005886;GO:0016020;GO:0016585;GO:0031982;GO:0031988;GO:0032991;GO:0043226;GO:0043227;GO:0043228;GO:0043229;GO:0043230;GO:0043231;GO:0043232;GO:0043234;GO:0044421;GO:0044422;GO:0044424;GO:0044428;GO:0044446;GO:0044451;GO:0044464;GO:0065010;GO:0070062	CLAFHDISPQAPTHFLVIPK	20	3	1	C[125.0477]LAFHDISPQAPTHFLVIPK	C[130.0791]LAFHDISPQAPTHFLVIPK	C	1.15356	-0.0273675	1.21989	1.02545	0.728682	0.956652	0.440684	1.13792	0.768241	0.735913	0.575395	1.11672	1.02997	1.18755	0.677637	1.30988	0.465447	0.880177	0.555783	0.533001	1.0656	1.20276	0.480309	0.765158	0.711723	0.976568	1.2653	0.95481	0.406605	0.308815	0.0809209
	+	0.0683803	1.90359	-0.181381	P50995	Annexin A11	ANXA11	294	GO:0006810;GO:0006897;GO:0006909;GO:0007049;GO:0009987;GO:0010035;GO:0010038;GO:0010324;GO:0016043;GO:0016044;GO:0016192;GO:0042221;GO:0050896;GO:0051234;GO:0051301;GO:0051592;GO:0061024;GO:0071840	GO:0003823;GO:0005488;GO:0005509;GO:0005515;GO:0005543;GO:0005544;GO:0008289;GO:0008429;GO:0023023;GO:0023026;GO:0043167;GO:0043169;GO:0046872;GO:0048306	GO:0000323;GO:0005635;GO:0005654;GO:0005737;GO:0005764;GO:0005766;GO:0005773;GO:0005819;GO:0016020;GO:0016023;GO:0030139;GO:0030141;GO:0030496;GO:0031410;GO:0031967;GO:0031975;GO:0031982;GO:0031988;GO:0042470;GO:0042581;GO:0042582;GO:0043226;GO:0043227;GO:0043228;GO:0043229;GO:0043230;GO:0043231;GO:0043232;GO:0044421;GO:0044422;GO:0044424;GO:0044428;GO:0044430;GO:0044444;GO:0044446;GO:0044464;GO:…	EAIKGVGTDEACLIEILASR	20	2;3	1	EAIKGVGTDEAC[125.0477]LIEILASR	EAIKGVGTDEAC[130.0791]LIEILASR	C	0.76265	-0.282016	0.935747	1.35315	0.212667	0.922829	0.96253	0.771746	0.563352	0.452162	0.717411	NaN	0.518763	0.0263705	0.478159	0.891211	0.0711967	0.262908	0.528394	-0.219715	0.504823	1.72582	0.314819	1.11305	0.421537	0.542464	0.444159	-0.249196	0.467988	0.372766	0.809699
	+	0.117525	1.56098	-0.190081	P07099	Epoxide hydrolase 1	EPHX1	304	GO:0006725;GO:0008152;GO:0009056;GO:0009636;GO:0009987;GO:0010033;GO:0014070;GO:0019439;GO:0042221;GO:0044237;GO:0044248;GO:0050896	GO:0003824;GO:0004301;GO:0016787;GO:0016801;GO:0016803;GO:0033961	GO:0005789;GO:0016020;GO:0016021;GO:0031090;GO:0031224;GO:0044422;GO:0044424;GO:0044425;GO:0044432;GO:0044444;GO:0044446;GO:0044464	ESGYMHIQCTKPDTVGSALNDSPVGLAAYILEK	33	3;4	1	ESGYMHIQC[125.0477]TKPDTVGSALNDSPVGLAAYILEK	ESGYMHIQC[130.0791]TKPDTVGSALNDSPVGLAAYILEK	C	-0.36322	NaN	-0.462432	-0.0461639	NaN	NaN	NaN	-0.30791	NaN	NaN	NaN	-0.14582	-0.249779	-0.041506	NaN	0.0677119	-0.163855	-0.129625	NaN	NaN	NaN	NaN	NaN	0.295387	-0.507156	-0.108555	NaN	NaN	-0.870037	-0.338492	NaN
	+	0.146212	1.41515	-0.190741	Q14764	Major vault protein	MVP	572	GO:0001932;GO:0001933;GO:0006469;GO:0006810;GO:0008152;GO:0008283;GO:0009892;GO:0010563;GO:0010605;GO:0015031;GO:0015931;GO:0019220;GO:0019222;GO:0019538;GO:0023051;GO:0023057;GO:0031323;GO:0031324;GO:0031399;GO:0031400;GO:0031952;GO:0031953;GO:0032268;GO:0032269;GO:0033673;GO:0042325;GO:0042326;GO:0043086;GO:0043170;GO:0043549;GO:0044092;GO:0044238;GO:0045184;GO:0045859;GO:0045936;GO:0048519;GO:…	GO:0005488;GO:0005515;GO:0019899;GO:0019900;GO:0019901;GO:0019902;GO:0019903	GO:0005634;GO:0005643;GO:0005737;GO:0005856;GO:0016020;GO:0030529;GO:0031982;GO:0031988;GO:0032991;GO:0043226;GO:0043227;GO:0043228;GO:0043229;GO:0043230;GO:0043231;GO:0043232;GO:0043234;GO:0044421;GO:0044422;GO:0044424;GO:0044425;GO:0044428;GO:0044444;GO:0044446;GO:0044464;GO:0046930;GO:0048471;GO:0065010;GO:0070062	LFSVPDFVGDACK	13	2	1	LFSVPDFVGDAC[125.0477]K	LFSVPDFVGDAC[130.0791]K	C	0.660762	-1.5223	0.885492	-0.380278	NaN	0.426049	0.512331	0.31917	NaN	0.753082	0.585096	1.1374	0.865286	0.943955	0.0519844	1.23311	0.86786	1.42438	0.605939	-0.021768	NaN	1.32241	-0.0613293	-0.179482	0.853672	0.823791	NaN	-0.279967	1.05218	0.721373	0.66511
+	+	0.00896774	3.04657	-0.192091	Q15437	Protein transport protein Sec23B	SEC23B	40	GO:0006810;GO:0006886;GO:0006888;GO:0009987;GO:0015031;GO:0016192;GO:0045184;GO:0046907;GO:0048193;GO:0051234;GO:0051649	GO:0005488;GO:0008270;GO:0043167;GO:0043169;GO:0046872;GO:0046914	GO:0000139;GO:0005789;GO:0012505;GO:0016020;GO:0030117;GO:0030120;GO:0030127;GO:0031090;GO:0032991;GO:0033116;GO:0043226;GO:0043227;GO:0043229;GO:0043231;GO:0043234;GO:0044422;GO:0044424;GO:0044425;GO:0044431;GO:0044432;GO:0044433;GO:0044444;GO:0044446;GO:0044464;GO:0048471	MVVPLACLLTPLK	13	2	1	MVVPLAC[125.0477]LLTPLK	MVVPLAC[130.0791]LLTPLK	C	NaN	NaN	-1.02283	NaN	-1.26785	NaN	NaN	NaN	NaN	-1.36783	NaN	-0.704983	-1.19151	NaN	NaN	-0.680067	-0.951861	-0.457728	NaN	NaN	NaN	NaN	-1.58789	-0.717531	NaN	-0.622696	NaN	-0.999843	-1.35586	-1.23926	-1.29615
	+	0.0785705	1.81643	-0.19229	Q9Y490	Talin-1	TLN1	750	GO:0001775;GO:0002576;GO:0003008;GO:0003012;GO:0006810;GO:0006887;GO:0006928;GO:0006935;GO:0006936;GO:0006950;GO:0006984;GO:0006986;GO:0006996;GO:0007010;GO:0007016;GO:0007043;GO:0007044;GO:0007155;GO:0007165;GO:0007411;GO:0007596;GO:0007599;GO:0008152;GO:0009605;GO:0009987;GO:0010033;GO:0016032;GO:0016043;GO:0016192;GO:0016337;GO:0019538;GO:0022607;GO:0022610;GO:0030029;GO:0030036;GO:0030168;GO:…	GO:0005102;GO:0005178;GO:0005198;GO:0005200;GO:0005488;GO:0005515;GO:0008092;GO:0017166;GO:0019904;GO:0030274;GO:0032403	GO:0001726;GO:0005576;GO:0005737;GO:0005815;GO:0005829;GO:0005886;GO:0005911;GO:0005912;GO:0005924;GO:0005925;GO:0009986;GO:0016020;GO:0030054;GO:0030055;GO:0031253;GO:0031256;GO:0031982;GO:0031988;GO:0032587;GO:0042995;GO:0043226;GO:0043227;GO:0043230;GO:0044421;GO:0044422;GO:0044424;GO:0044425;GO:0044430;GO:0044444;GO:0044446;GO:0044459;GO:0044463;GO:0044464;GO:0065010;GO:0070062;GO:0070161	AVEGCVSASQAATEDGQLLR	20	2	1	AVEGC[125.0477]VSASQAATEDGQLLR	AVEGC[130.0791]VSASQAATEDGQLLR	C	0.240377	NaN	0.0475275	0.593793	0.746459	-0.187833	0.253225	0.779627	-0.138083	0.485305	0.254577	-0.743547	0.0114832	-0.108998	0.317089	0.26111	-0.0819979	0.141347	0.213919	-0.654399	0.461417	0.978545	0.611868	0.316617	-0.00765691	1.57556	0.524723	-0.17096	0.25549	-0.249894	-0.0970933
+	+	0.00210811	3.75423	-0.19511	P07355	Annexin A2	ANXA2	133	GO:0001525;GO:0001765;GO:0001932;GO:0001934;GO:0002090;GO:0002091;GO:0006461;GO:0006605;GO:0006810;GO:0006886;GO:0006900;GO:0006996;GO:0007589;GO:0008284;GO:0009892;GO:0009893;GO:0009894;GO:0009895;GO:0009966;GO:0009987;GO:0010469;GO:0010562;GO:0010604;GO:0010605;GO:0010638;GO:0015031;GO:0016043;GO:0016044;GO:0016050;GO:0019220;GO:0019222;GO:0022607;GO:0023051;GO:0030100;GO:0030193;GO:0030195;GO:…	GO:0004857;GO:0004859;GO:0005488;GO:0005509;GO:0005515;GO:0005543;GO:0005544;GO:0005546;GO:0008289;GO:0019834;GO:0030234;GO:0035091;GO:0043167;GO:0043169;GO:0046872;GO:0048306;GO:0055102	GO:0001726;GO:0005604;GO:0005615;GO:0005634;GO:0005765;GO:0005768;GO:0005769;GO:0005774;GO:0005811;GO:0005886;GO:0005938;GO:0009986;GO:0010008;GO:0016020;GO:0016023;GO:0016323;GO:0019897;GO:0019898;GO:0030496;GO:0031090;GO:0031410;GO:0031902;GO:0031982;GO:0031988;GO:0035749;GO:0042383;GO:0042470;GO:0042995;GO:0043220;GO:0043226;GO:0043227;GO:0043229;GO:0043230;GO:0043231;GO:0044352;GO:0044354;GO:…	GLGTDEDSLIEIICSR	16	2;3	1	GLGTDEDSLIEIIC[125.0477]SR	GLGTDEDSLIEIIC[130.0791]SR	C	-0.213283	0.218944	0.257897	0.383312	0.373632	0.440154	0.591211	0.278943	1.11689	0.718684	0.794619	0.962541	1.00794	0.498283	0.453187	0.75734	0.0261077	0.412389	0.244216	0.416264	0.401835	0.726493	0.0637277	0.572143	-0.00905409	0.614871	0.122717	0.640734	0.0195281	0.34604	-0.371672
	+	0.0520472	2.05615	-0.19618	P02545	Prelamin-A/C	LMNA	570	GO:0000226;GO:0000278;GO:0001666;GO:0006605;GO:0006606;GO:0006810;GO:0006886;GO:0006913;GO:0006915;GO:0006921;GO:0006950;GO:0006984;GO:0006986;GO:0006996;GO:0006998;GO:0007010;GO:0007017;GO:0007049;GO:0007077;GO:0007084;GO:0007163;GO:0007165;GO:0007517;GO:0008104;GO:0008152;GO:0008219;GO:0009987;GO:0010033;GO:0010639;GO:0010821;GO:0010823;GO:0010941;GO:0012501;GO:0015031;GO:0016043;GO:0016044;GO:…	GO:0005198	GO:0005634;GO:0005635;GO:0005638;GO:0005652;GO:0005654;GO:0005737;GO:0005829;GO:0005882;GO:0016020;GO:0016604;GO:0016607;GO:0031090;GO:0031965;GO:0031967;GO:0031975;GO:0032991;GO:0043226;GO:0043227;GO:0043229;GO:0043231;GO:0043234;GO:0044422;GO:0044424;GO:0044428;GO:0044430;GO:0044444;GO:0044446;GO:0044451;GO:0044464;GO:0048471	SVTVVEDDEDEDGDDLLHHHHGSHCSSSGDPAEYNLR	37	4;5	1	SVTVVEDDEDEDGDDLLHHHHGSHC[125.0477]SSSGDPAEYNLR	SVTVVEDDEDEDGDDLLHHHHGSHC[130.0791]SSSGDPAEYNLR	C	NaN	NaN	NaN	NaN	NaN	0.948639	NaN	NaN	NaN	NaN	NaN	NaN	NaN	0.73515	0.831223	0.709831	0.220187	0.660388	0.362372	NaN	NaN	NaN	NaN	0.553034	0.591451	0.405254	NaN	NaN	0.215225	0.909309	-0.26218
	+	0.0995335	1.67156	-0.196828	O00483	Cytochrome c oxidase subunit NDUFA4	NDUFA4	44	GO:0006091;GO:0006120;GO:0008152;GO:0009987;GO:0022900;GO:0022904;GO:0044237;GO:0044281;GO:0055114	GO:0003824;GO:0003954;GO:0005488;GO:0005515;GO:0008137;GO:0016491;GO:0016651;GO:0016655;GO:0032403;GO:0050136	GO:0005739;GO:0005743;GO:0005747;GO:0005751;GO:0016020;GO:0019866;GO:0030964;GO:0031090;GO:0031966;GO:0031982;GO:0031988;GO:0032991;GO:0043226;GO:0043227;GO:0043229;GO:0043230;GO:0043231;GO:0043234;GO:0044421;GO:0044422;GO:0044424;GO:0044425;GO:0044429;GO:0044444;GO:0044446;GO:0044455;GO:0044464;GO:0045271;GO:0045277;GO:0065010;GO:0070062	LALFNPDVCWDR	12	2	1	LALFNPDVC[125.0477]WDR	LALFNPDVC[130.0791]WDR	C	0.557851	-1.16963	0.730762	0.717223	0.356274	1.02524	0.279658	1.04606	1.62263	0.664011	0.200347	0.960611	0.554531	1.22657	-0.129641	NaN	0.521905	-0.193192	0.023808	NaN	-0.172675	1.127	0.0567078	0.307471	-0.330757	0.985155	0.0541103	-0.0485305	-0.169813	-0.90264	0.223624
	+	0.0765657	1.83834	-0.198187	P10809	60 kDa heat shock protein, mitochondrial	HSPD1	442	GO:0001775;GO:0001816;GO:0001817;GO:0001819;GO:0002200;GO:0002204;GO:0002208;GO:0002218;GO:0002221;GO:0002224;GO:0002250;GO:0002252;GO:0002253;GO:0002263;GO:0002285;GO:0002312;GO:0002366;GO:0002367;GO:0002368;GO:0002376;GO:0002440;GO:0002443;GO:0002449;GO:0002460;GO:0002562;GO:0002682;GO:0002684;GO:0002694;GO:0002696;GO:0002697;GO:0002699;GO:0002703;GO:0002705;GO:0002706;GO:0002708;GO:0002709;GO:…	GO:0000166;GO:0001530;GO:0002039;GO:0003676;GO:0003677;GO:0003688;GO:0003697;GO:0003723;GO:0003725;GO:0003824;GO:0005488;GO:0005515;GO:0005524;GO:0016462;GO:0016787;GO:0016817;GO:0016818;GO:0016887;GO:0017076;GO:0017111;GO:0019899;GO:0030554;GO:0031625;GO:0032553;GO:0032555;GO:0032559;GO:0035639;GO:0043565;GO:0043566;GO:0051082;GO:0051087	GO:0005615;GO:0005737;GO:0005739;GO:0005743;GO:0005759;GO:0005768;GO:0005769;GO:0005829;GO:0005886;GO:0005905;GO:0009986;GO:0016020;GO:0016023;GO:0019866;GO:0030135;GO:0030141;GO:0031090;GO:0031410;GO:0031966;GO:0031974;GO:0031982;GO:0031988;GO:0032991;GO:0043226;GO:0043227;GO:0043229;GO:0043230;GO:0043231;GO:0043233;GO:0043234;GO:0043235;GO:0044421;GO:0044422;GO:0044424;GO:0044425;GO:0044429;GO:…	AAVEEGIVLGGGCALLR	17	2;3	1	AAVEEGIVLGGGC[125.0477]ALLR	AAVEEGIVLGGGC[130.0791]ALLR	C	-0.474869	NaN	-0.766261	-0.777848	NaN	-0.607977	-0.641091	-0.76294	NaN	-0.797201	-0.830203	-0.382229	-0.734593	-0.443596	NaN	-0.495717	-0.711885	-0.501455	NaN	NaN	NaN	-0.435911	NaN	-0.406604	-0.73269	0.0548798	-0.745989	-0.925196	NaN	-1.30095	-1.40387
	+	0.14228	1.43339	-0.199188	P04040	Catalase	CAT	460	GO:0000302;GO:0001649;GO:0001657;GO:0001666;GO:0006066;GO:0006091;GO:0006139;GO:0006144;GO:0006163;GO:0006195;GO:0006355;GO:0006461;GO:0006629;GO:0006638;GO:0006639;GO:0006641;GO:0006662;GO:0006725;GO:0006753;GO:0006807;GO:0006950;GO:0006979;GO:0007568;GO:0007584;GO:0008152;GO:0008202;GO:0008203;GO:0009056;GO:0009060;GO:0009112;GO:0009117;GO:0009166;GO:0009314;GO:0009411;GO:0009416;GO:0009605;GO:…	GO:0000166;GO:0003824;GO:0004046;GO:0004096;GO:0004601;GO:0005102;GO:0005488;GO:0005506;GO:0005515;GO:0016209;GO:0016491;GO:0016684;GO:0016787;GO:0016810;GO:0016811;GO:0019899;GO:0020037;GO:0042802;GO:0042803;GO:0043167;GO:0043169;GO:0046872;GO:0046906;GO:0046914;GO:0046983;GO:0048037;GO:0050661;GO:0050662	GO:0000323;GO:0005758;GO:0005764;GO:0005773;GO:0005777;GO:0005778;GO:0005782;GO:0005783;GO:0005794;GO:0005829;GO:0005886;GO:0005912;GO:0005924;GO:0005925;GO:0016020;GO:0030054;GO:0030055;GO:0031090;GO:0031903;GO:0031907;GO:0031970;GO:0031974;GO:0031982;GO:0031988;GO:0042579;GO:0043226;GO:0043227;GO:0043229;GO:0043230;GO:0043231;GO:0043233;GO:0044421;GO:0044422;GO:0044424;GO:0044429;GO:0044438;GO:…	LCENIAGHLK	10	2	1	LC[125.0477]ENIAGHLK	LC[130.0791]ENIAGHLK	C	-0.933513	-1.57656	-0.782138	NaN	-0.0190905	NaN	-1.03416	-0.694782	-1.24802	-1.2435	-0.732856	-0.669015	-0.0822205	NaN	-0.847844	-2.63688	-0.673263	NaN	-0.881014	-0.529935	-0.560221	-1.10388	-0.954386	-1.10259	-1.02359	-1.06042	-0.847817	-0.396039	-1.41496	NaN	-1.15636
	+	0.129598	1.49605	-0.199575	P12814	Alpha-actinin-1	ACTN1	180	GO:0001775;GO:0002576;GO:0006810;GO:0006887;GO:0006996;GO:0007010;GO:0007015;GO:0007044;GO:0007596;GO:0007599;GO:0009987;GO:0010941;GO:0016043;GO:0016192;GO:0022607;GO:0030029;GO:0030036;GO:0030168;GO:0030198;GO:0032501;GO:0032879;GO:0032940;GO:0034329;GO:0034330;GO:0042981;GO:0043062;GO:0043067;GO:0046903;GO:0048041;GO:0048519;GO:0048523;GO:0050789;GO:0050794;GO:0050817;GO:0050878;GO:0051017;GO:…	GO:0000988;GO:0000989;GO:0003676;GO:0003712;GO:0003713;GO:0003723;GO:0003725;GO:0005102;GO:0005178;GO:0005488;GO:0005509;GO:0005515;GO:0008092;GO:0017166;GO:0030374;GO:0032403;GO:0043167;GO:0043169;GO:0044325;GO:0046872	GO:0001725;GO:0001726;GO:0005576;GO:0005615;GO:0005634;GO:0005737;GO:0005829;GO:0005856;GO:0005886;GO:0005911;GO:0005912;GO:0005913;GO:0005916;GO:0005924;GO:0005925;GO:0016020;GO:0030018;GO:0030054;GO:0030055;GO:0030863;GO:0030864;GO:0031093;GO:0031143;GO:0031974;GO:0031982;GO:0031983;GO:0031988;GO:0032432;GO:0034774;GO:0042641;GO:0042995;GO:0043005;GO:0043197;GO:0043226;GO:0043227;GO:0043228;GO:…	DGLGFCALIHR	11	2	1	DGLGFC[125.0477]ALIHR	DGLGFC[130.0791]ALIHR	C	-0.305267	NaN	-0.211364	NaN	-0.868546	-0.0551793	-0.324029	-0.285789	NaN	-0.641661	-0.331693	-0.511249	NaN	0.187347	NaN	0.135901	-0.447258	-0.397853	-0.263156	NaN	-0.224532	NaN	-0.0401827	-0.0069489	-1.28478	-0.274141	NaN	-0.546007	-1.03168	-0.838635	-0.974873
	+	0.126216	1.51563	-0.200308	P09429	High mobility group protein B1	HMGB1	23	GO:0000122;GO:0000737;GO:0001773;GO:0001775;GO:0002200;GO:0002274;GO:0002376;GO:0002407;GO:0002437;GO:0002562;GO:0006139;GO:0006259;GO:0006265;GO:0006266;GO:0006288;GO:0006308;GO:0006309;GO:0006310;GO:0006325;GO:0006338;GO:0006355;GO:0006357;GO:0006807;GO:0006915;GO:0006921;GO:0006928;GO:0006935;GO:0006950;GO:0006952;GO:0006954;GO:0006955;GO:0006996;GO:0008152;GO:0008219;GO:0009056;GO:0009057;GO:…	GO:0001071;GO:0003676;GO:0003677;GO:0003682;GO:0003684;GO:0003690;GO:0003697;GO:0003700;GO:0005102;GO:0005125;GO:0005488;GO:0005515;GO:0008134;GO:0008301;GO:0042056;GO:0043566;GO:0050786;GO:0070491	GO:0000793;GO:0005576;GO:0005615;GO:0005634;GO:0005654;GO:0005694;GO:0009986;GO:0043226;GO:0043227;GO:0043228;GO:0043229;GO:0043231;GO:0043232;GO:0044421;GO:0044422;GO:0044424;GO:0044428;GO:0044446;GO:0044464	MSSYAFFVQTCR	12	2	1	MSSYAFFVQTC[125.0477]R	MSSYAFFVQTC[130.0791]R	C	-1.06887	NaN	-1.15591	NaN	NaN	NaN	NaN	-2.2504	NaN	NaN	-0.700828	NaN	-0.452894	0.0312952	-0.410948	-0.0995928	-0.687785	-0.100803	-0.757361	NaN	NaN	NaN	NaN	NaN	-0.556621	-0.203934	NaN	-0.312245	-0.91078	-1.78713	-1.17714
+	+	0.00572	3.31178	-0.203699	P27105	Stomatin	STOM	87	GO:0002230;GO:0002682;GO:0002697;GO:0002831;GO:0006461;GO:0016043;GO:0022607;GO:0031347;GO:0043900;GO:0043933;GO:0048583;GO:0050688;GO:0050691;GO:0050789;GO:0051259;GO:0051260;GO:0065003;GO:0065007;GO:0071822;GO:0071840;GO:0080134	GO:0005488;GO:0005515;GO:0019899;GO:0070063	GO:0005615;GO:0005737;GO:0005739;GO:0005783;GO:0005856;GO:0005887;GO:0016020;GO:0016021;GO:0016023;GO:0031224;GO:0031226;GO:0031410;GO:0031982;GO:0031988;GO:0042470;GO:0043226;GO:0043227;GO:0043228;GO:0043229;GO:0043230;GO:0043231;GO:0043232;GO:0044421;GO:0044424;GO:0044425;GO:0044444;GO:0044459;GO:0044464;GO:0045121;GO:0048770;GO:0065010;GO:0070062;GO:0072562	GPGLFFILPCTDSFIK	16	2	1	GPGLFFILPC[125.0477]TDSFIK	GPGLFFILPC[130.0791]TDSFIK	C	-1.41896	-2.20434	-1.51381	-0.96223	-1.5349	-0.877232	-1.28711	-0.902254	-0.899172	-0.828201	-1.6693	NaN	-1.04765	-0.863526	-1.41112	-0.86658	-1.56106	-0.710874	-1.77338	-1.20563	-1.08057	-1.44905	-2.1865	-0.74221	-1.31211	-0.893607	-1.36375	-1.112	-1.41973	-1.21311	-1.11483
+	+	0.000692308	4.24659	-0.205072	P31947	14-3-3 protein sigma	SFN	96	GO:0000079;GO:0001558;GO:0001836;GO:0001932;GO:0002064;GO:0003334;GO:0006139;GO:0006352;GO:0006367;GO:0006469;GO:0006807;GO:0006915;GO:0006917;GO:0006950;GO:0006974;GO:0006996;GO:0007005;GO:0007165;GO:0007264;GO:0008152;GO:0008219;GO:0008285;GO:0008629;GO:0008630;GO:0008637;GO:0009058;GO:0009987;GO:0010466;GO:0010467;GO:0010482;GO:0010837;GO:0010839;GO:0010941;GO:0010942;GO:0012501;GO:0012502;GO:…	GO:0004857;GO:0004860;GO:0008426;GO:0019207;GO:0019210;GO:0019887;GO:0030234;GO:0030291	GO:0005615;GO:0005634;GO:0005737;GO:0005829;GO:0012506;GO:0016020;GO:0030659;GO:0031090;GO:0031982;GO:0031988;GO:0043226;GO:0043227;GO:0043229;GO:0043230;GO:0043231;GO:0044421;GO:0044422;GO:0044424;GO:0044433;GO:0044444;GO:0044446;GO:0044464;GO:0065010;GO:0070062	EKVETELQGVCDTVLGLLDSHLIK	24	3;4	1	EKVETELQGVC[125.0477]DTVLGLLDSHLIK	EKVETELQGVC[130.0791]DTVLGLLDSHLIK	C	0.463434	-0.951593	0.489957	0.630632	0.328066	0.793215	0.387607	0.794261	-0.268028	0.652757	-0.0228971	0.870758	0.410203	0.448653	0.245269	0.499985	0.438395	0.664812	0.162046	0.229956	-0.0568507	0.84554	0.282085	0.476482	0.451342	0.796672	0.53279	0.545884	0.126024	0.501744	0.510457
+	+	0.0224318	2.54479	-0.206649	O15247	Chloride intracellular channel protein 2	CLIC2	184	GO:0006810;GO:0006937;GO:0006942;GO:0007165;GO:0008016;GO:0008152;GO:0009987;GO:0010522;GO:0010880;GO:0010881;GO:0010882;GO:0010959;GO:0019722;GO:0019932;GO:0022898;GO:0032386;GO:0032409;GO:0032410;GO:0032412;GO:0032413;GO:0032844;GO:0032879;GO:0034762;GO:0034765;GO:0035556;GO:0043269;GO:0044057;GO:0044092;GO:0044093;GO:0048519;GO:0050789;GO:0050794;GO:0050896;GO:0051049;GO:0051051;GO:0051098;GO:…	GO:0003824;GO:0004601;GO:0004602;GO:0005215;GO:0005216;GO:0005244;GO:0005253;GO:0005254;GO:0008509;GO:0015075;GO:0015267;GO:0016209;GO:0016491;GO:0016684;GO:0022803;GO:0022832;GO:0022836;GO:0022838;GO:0022857;GO:0022891;GO:0022892	GO:0005622;GO:0005634;GO:0005737;GO:0032991;GO:0034702;GO:0034707;GO:0043226;GO:0043227;GO:0043229;GO:0043231;GO:0043234;GO:0044424;GO:0044425;GO:0044464	LFLDGDQLTLADCSLLPK	18	2	1	LFLDGDQLTLADC[125.0477]SLLPK	LFLDGDQLTLADC[130.0791]SLLPK	C	0.206215	NaN	0.270618	0.273779	0.156523	0.0910996	-0.000921003	NaN	0.42258	0.327293	0.209521	NaN	0.523441	NaN	0.299416	0.281933	0.400658	NaN	0.173742	NaN	0.15802	0.568108	0.228277	1.65836	0.220445	NaN	0.044988	NaN	-0.0361558	NaN	0.203269
	+	0.062367	1.96485	-0.213771	Q9BXD5	N-acetylneuraminate lyase	NPL	185	GO:0005975;GO:0005996;GO:0006040;GO:0006054;GO:0006066;GO:0006082;GO:0006464;GO:0006486;GO:0006487;GO:0006488;GO:0008152;GO:0009056;GO:0009058;GO:0009311;GO:0009312;GO:0009987;GO:0016051;GO:0016052;GO:0018193;GO:0018196;GO:0018279;GO:0019262;GO:0019538;GO:0019752;GO:0042180;GO:0043170;GO:0043412;GO:0043413;GO:0043436;GO:0043687;GO:0044237;GO:0044238;GO:0044260;GO:0044262;GO:0044267;GO:0044275;GO:…	GO:0003824;GO:0008747;GO:0016829;GO:0016830;GO:0016833	GO:0005829;GO:0044424;GO:0044444;GO:0044464	FSDTDLLDFGQCVDQNR	17	2	1	FSDTDLLDFGQC[125.0477]VDQNR	FSDTDLLDFGQC[130.0791]VDQNR	C	NaN	NaN	0.787364	0.897539	0.750386	1.13822	0.458409	1.05061	NaN	0.884448	NaN	1.0515	0.892659	1.4503	NaN	1.39103	0.896986	NaN	1.18192	NaN	NaN	0.804747	NaN	0.639999	0.400464	1.30449	NaN	0.934167	NaN	0.851998	NaN
+	+	0.00491667	3.37077	-0.214632	P42167	Lamina-associated polypeptide 2, isoforms beta/gamma	TMPO	363		GO:0003676;GO:0003677;GO:0005488;GO:0005515;GO:0005521	GO:0005634;GO:0005635;GO:0005637;GO:0005737;GO:0016020;GO:0016021;GO:0019866;GO:0031090;GO:0031224;GO:0031965;GO:0031967;GO:0031975;GO:0043226;GO:0043227;GO:0043229;GO:0043231;GO:0044422;GO:0044424;GO:0044425;GO:0044428;GO:0044446;GO:0044464	EMFPYEASTPTGISASCR	18	2	1	EMFPYEASTPTGISASC[125.0477]R	EMFPYEASTPTGISASC[130.0791]R	C	-0.43996	NaN	-0.978788	NaN	NaN	NaN	NaN	-0.378271	NaN	NaN	NaN	0.786566	NaN	0.136375	-0.841465	NaN	-0.265773	0.162159	-0.296772	NaN	NaN	NaN	-0.969825	NaN	-0.235515	0.0955808	NaN	-0.0286056	-0.366052	-0.75952	-0.518094
	+	0.149809	1.39811	-0.217161	Q9Y678	Coatomer subunit gamma-1	COPG1	97	GO:0006810;GO:0006886;GO:0006890;GO:0006901;GO:0006928;GO:0006996;GO:0007017;GO:0007018;GO:0009987;GO:0010970;GO:0015031;GO:0016043;GO:0016050;GO:0016192;GO:0030705;GO:0045184;GO:0046907;GO:0048193;GO:0048200;GO:0048205;GO:0051234;GO:0051649;GO:0051656;GO:0051683;GO:0061024;GO:0071840;GO:0071841;GO:0071842;GO:0072384	GO:0005198	GO:0000139;GO:0005829;GO:0016020;GO:0030117;GO:0030120;GO:0030126;GO:0031090;GO:0032991;GO:0043234;GO:0044422;GO:0044424;GO:0044425;GO:0044431;GO:0044433;GO:0044444;GO:0044446;GO:0044464	EMSCIAEDVIIVTSSLTK	18	2;3	1	EMSC[125.0477]IAEDVIIVTSSLTK	EMSC[130.0791]IAEDVIIVTSSLTK	C	NaN	NaN	NaN	NaN	NaN	NaN	NaN	NaN	NaN	NaN	NaN	0.049407	0.368565	0.490901	NaN	0.76818	0.661139	1.06715	-0.0656792	NaN	NaN	NaN	NaN	0.279912	NaN	NaN	NaN	NaN	NaN	0.76537	NaN
	+	0.173631	1.31108	-0.218525	O00429	Dynamin-1-like protein	DNM1L	470	GO:0000266;GO:0001836;GO:0003373;GO:0003374;GO:0006461;GO:0006810;GO:0006897;GO:0006915;GO:0006921;GO:0006996;GO:0007005;GO:0008104;GO:0008152;GO:0008219;GO:0008637;GO:0009653;GO:0009987;GO:0010324;GO:0010638;GO:0010821;GO:0010822;GO:0010941;GO:0010942;GO:0012501;GO:0016043;GO:0016044;GO:0016192;GO:0016265;GO:0016559;GO:0022411;GO:0022603;GO:0022607;GO:0032459;GO:0032502;GO:0032879;GO:0032880;GO:…	GO:0000166;GO:0003824;GO:0003924;GO:0005488;GO:0005515;GO:0005525;GO:0008289;GO:0016462;GO:0016787;GO:0016817;GO:0016818;GO:0017076;GO:0017111;GO:0019001;GO:0019899;GO:0031625;GO:0032553;GO:0032555;GO:0032561;GO:0035639;GO:0042802;GO:0042803;GO:0046983	GO:0005737;GO:0005739;GO:0005741;GO:0005777;GO:0005794;GO:0005829;GO:0005874;GO:0005905;GO:0012506;GO:0016020;GO:0019867;GO:0030054;GO:0030659;GO:0030662;GO:0030665;GO:0030672;GO:0031090;GO:0031966;GO:0031968;GO:0032991;GO:0042579;GO:0043226;GO:0043227;GO:0043229;GO:0043231;GO:0043234;GO:0044422;GO:0044424;GO:0044425;GO:0044429;GO:0044430;GO:0044433;GO:0044444;GO:0044446;GO:0044456;GO:0044464;GO:…	LHDAIVEVVTCLLR	14	2;3	1	LHDAIVEVVTC[125.0477]LLR	LHDAIVEVVTC[130.0791]LLR	C	-0.788706	NaN	NaN	NaN	NaN	NaN	NaN	-0.462542	NaN	-0.55696	NaN	NaN	NaN	-1.36892	NaN	-0.0871195	-0.0584635	-0.178496	NaN	NaN	NaN	NaN	-0.600432	1.11569	NaN	-0.210259	NaN	-0.447765	NaN	NaN	-1.01155
	+	0.0957844	1.699	-0.220832	P45974	Ubiquitin carboxyl-terminal hydrolase 5	USP5	219	GO:0006464;GO:0006508;GO:0006511;GO:0008152;GO:0009056;GO:0009057;GO:0009893;GO:0009894;GO:0009896;GO:0009987;GO:0010604;GO:0016579;GO:0019222;GO:0019538;GO:0019941;GO:0030162;GO:0031323;GO:0031325;GO:0031329;GO:0031331;GO:0032268;GO:0032270;GO:0032434;GO:0032436;GO:0042176;GO:0043170;GO:0043412;GO:0043632;GO:0044237;GO:0044238;GO:0044248;GO:0044260;GO:0044265;GO:0044267;GO:0045732;GO:0045862;GO:…	GO:0003824;GO:0004175;GO:0004197;GO:0004843;GO:0005488;GO:0008233;GO:0008234;GO:0008238;GO:0008242;GO:0008270;GO:0016787;GO:0019783;GO:0043167;GO:0043169;GO:0046872;GO:0046914;GO:0070011	GO:0000323;GO:0005764;GO:0005773;GO:0043226;GO:0043227;GO:0043229;GO:0043231;GO:0044424;GO:0044444;GO:0044464	ENLWLNLTDGSILCGR	16	2	1	ENLWLNLTDGSILC[125.0477]GR	ENLWLNLTDGSILC[130.0791]GR	C	NaN	NaN	0.3031	NaN	-0.544112	-0.181196	-0.455018	NaN	NaN	NaN	NaN	NaN	-0.060795	-0.168453	NaN	-0.425804	NaN	0.0210882	NaN	-0.0905413	NaN	NaN	-0.138508	0.603296	NaN	NaN	-0.463397	NaN	NaN	NaN	NaN
+	+	0.0377864	2.27177	-0.223139	P11142	Heat shock cognate 71 kDa protein	HSPA8	574	GO:0000375;GO:0000377;GO:0000398;GO:0001505;GO:0006139;GO:0006351;GO:0006355;GO:0006396;GO:0006397;GO:0006457;GO:0006458;GO:0006807;GO:0006810;GO:0006836;GO:0006892;GO:0006935;GO:0006950;GO:0006986;GO:0007154;GO:0007267;GO:0007268;GO:0007269;GO:0007411;GO:0008152;GO:0008380;GO:0009058;GO:0009059;GO:0009266;GO:0009408;GO:0009605;GO:0009628;GO:0009889;GO:0009890;GO:0009892;GO:0009893;GO:0009987;GO:…	GO:0000166;GO:0001664;GO:0003823;GO:0003824;GO:0005102;GO:0005488;GO:0005515;GO:0005524;GO:0016462;GO:0016787;GO:0016817;GO:0016818;GO:0016887;GO:0017076;GO:0017111;GO:0019899;GO:0019904;GO:0023023;GO:0023026;GO:0030554;GO:0031072;GO:0031625;GO:0032553;GO:0032555;GO:0032559;GO:0035639;GO:0042623;GO:0051082;GO:0055131	GO:0000974;GO:0005615;GO:0005622;GO:0005634;GO:0005654;GO:0005681;GO:0005730;GO:0005829;GO:0005886;GO:0005912;GO:0005924;GO:0005925;GO:0012506;GO:0016020;GO:0016023;GO:0030054;GO:0030055;GO:0030529;GO:0030659;GO:0030662;GO:0030665;GO:0031090;GO:0031410;GO:0031982;GO:0031988;GO:0032991;GO:0042470;GO:0043226;GO:0043227;GO:0043228;GO:0043229;GO:0043230;GO:0043231;GO:0043232;GO:0043234;GO:0044421;GO:…	CNEIINWLDK	10	2	1	C[125.0477]NEIINWLDK	C[130.0791]NEIINWLDK	C	0.320104	NaN	NaN	NaN	0.586335	0.315828	0.748381	0.678998	0.849094	0.883583	NaN	0.937505	0.684428	0.862727	0.549239	0.824181	NaN	0.97866	0.411633	0.515207	0.787133	1.19113	-0.143386	-0.00517054	0.296752	0.868405	0.752741	-0.0124295	-0.0203589	NaN	-0.585244
+	+	0.00628037	3.23903	-0.230079	P23381	Tryptophan--tRNA ligase, cytoplasmic	WARS1	274	GO:0001525;GO:0006082;GO:0006139;GO:0006399;GO:0006412;GO:0006418;GO:0006436;GO:0006520;GO:0006807;GO:0008152;GO:0008285;GO:0009058;GO:0009059;GO:0009308;GO:0009987;GO:0010467;GO:0016070;GO:0019538;GO:0019752;GO:0022603;GO:0032502;GO:0034641;GO:0034645;GO:0034660;GO:0042127;GO:0042180;GO:0043038;GO:0043039;GO:0043170;GO:0043436;GO:0044106;GO:0044237;GO:0044238;GO:0044249;GO:0044260;GO:0044267;GO:…	GO:0000166;GO:0003824;GO:0004812;GO:0004830;GO:0005488;GO:0005524;GO:0016874;GO:0016875;GO:0016876;GO:0017076;GO:0030554;GO:0032553;GO:0032555;GO:0032559;GO:0035639	GO:0005634;GO:0005737;GO:0005829;GO:0031982;GO:0031988;GO:0043226;GO:0043227;GO:0043229;GO:0043230;GO:0043231;GO:0044421;GO:0044424;GO:0044444;GO:0044464;GO:0065010;GO:0070062	GIFGFTDSDCIGK	13	2	1	GIFGFTDSDC[125.0477]IGK	GIFGFTDSDC[130.0791]IGK	C	0.431614	NaN	0.816904	NaN	0.383826	1.12692	1.6177	0.771161	NaN	0.795818	0.753848	0.907139	1.48389	0.945369	1.09031	0.930231	0.903669	0.99777	1.25518	NaN	NaN	NaN	NaN	1.50799	0.806606	1.0194	0.673228	0.740691	0.556858	1.53665	0.820803
	+	0.0913189	1.73213	-0.231313	Q9NQR4	Omega-amidase NIT2	NIT2	170	GO:0006082;GO:0006107;GO:0006520;GO:0006528;GO:0006541;GO:0006807;GO:0008152;GO:0009064;GO:0009066;GO:0009308;GO:0009987;GO:0019752;GO:0034641;GO:0042180;GO:0043436;GO:0043648;GO:0044106;GO:0044237;GO:0044238;GO:0044281	GO:0003824;GO:0016787;GO:0016810;GO:0016811;GO:0050152	GO:0005737;GO:0005739;GO:0005813;GO:0005815;GO:0031982;GO:0031988;GO:0043226;GO:0043227;GO:0043228;GO:0043229;GO:0043230;GO:0043231;GO:0043232;GO:0044421;GO:0044422;GO:0044424;GO:0044430;GO:0044444;GO:0044446;GO:0044464;GO:0065010;GO:0070062	GCQLLVYPGAFNLTTGPAHWELLQR	25	3	1	GC[125.0477]QLLVYPGAFNLTTGPAHWELLQR	GC[130.0791]QLLVYPGAFNLTTGPAHWELLQR	C	-0.897891	NaN	-0.352636	-0.979603	NaN	NaN	-1.60976	-0.2312	NaN	-0.948504	NaN	NaN	-0.702736	-0.371162	NaN	-1.0199	-0.957418	-0.298891	NaN	NaN	NaN	NaN	NaN	-0.677041	-0.897446	-0.679777	NaN	-0.750913	-1.55274	-1.41318	-1.10766
	+	0.15929	1.36445	-0.234302	O14980	Exportin-1	XPO1	369	GO:0000054;GO:0000055;GO:0000056;GO:0000122;GO:0000278;GO:0006355;GO:0006357;GO:0006605;GO:0006611;GO:0006810;GO:0006886;GO:0006913;GO:0007049;GO:0007165;GO:0007166;GO:0007167;GO:0007178;GO:0007179;GO:0007264;GO:0008104;GO:0008152;GO:0009889;GO:0009890;GO:0009892;GO:0009894;GO:0009966;GO:0009968;GO:0009987;GO:0010467;GO:0010468;GO:0010556;GO:0010558;GO:0010564;GO:0010605;GO:0010629;GO:0010646;GO:…	GO:0003676;GO:0003723;GO:0005215;GO:0005487;GO:0005488;GO:0008565;GO:0022892	GO:0000776;GO:0005634;GO:0005635;GO:0005642;GO:0005654;GO:0005730;GO:0005737;GO:0005829;GO:0015030;GO:0016020;GO:0016604;GO:0030529;GO:0031090;GO:0031965;GO:0031967;GO:0031975;GO:0032991;GO:0043226;GO:0043227;GO:0043228;GO:0043229;GO:0043231;GO:0043232;GO:0043234;GO:0044422;GO:0044424;GO:0044425;GO:0044427;GO:0044428;GO:0044444;GO:0044446;GO:0044451;GO:0044464	ICLEYWNHLAAELYR	15	3	1	IC[125.0477]LEYWNHLAAELYR	IC[130.0791]LEYWNHLAAELYR	C	NaN	NaN	NaN	NaN	NaN	NaN	1.08561	0.962785	NaN	1.076	NaN	NaN	0.448608	1.0049	NaN	1.38316	NaN	1.3004	NaN	NaN	NaN	NaN	1.12937	1.2396	NaN	1.4058	NaN	NaN	NaN	NaN	NaN
	+	0.0553514	2.02504	-0.237377	Q7KZF4	Staphylococcal nuclease domain-containing protein 1	SND1	268	GO:0001649;GO:0006139;GO:0006351;GO:0006355;GO:0006807;GO:0008152;GO:0009058;GO:0009059;GO:0009889;GO:0009892;GO:0009987;GO:0010468;GO:0010556;GO:0010605;GO:0010608;GO:0010629;GO:0016032;GO:0016070;GO:0016441;GO:0016458;GO:0019219;GO:0019222;GO:0030154;GO:0031047;GO:0031323;GO:0031326;GO:0032502;GO:0032774;GO:0034641;GO:0034645;GO:0035194;GO:0040029;GO:0043170;GO:0044237;GO:0044238;GO:0044249;GO:…	GO:0000988;GO:0000989;GO:0003712;GO:0003824;GO:0004518;GO:0016787;GO:0016788	GO:0005634;GO:0005737;GO:0005739;GO:0016020;GO:0016023;GO:0016442;GO:0030529;GO:0031332;GO:0031410;GO:0031982;GO:0031988;GO:0032991;GO:0042470;GO:0043226;GO:0043227;GO:0043229;GO:0043230;GO:0043231;GO:0044421;GO:0044424;GO:0044444;GO:0044464;GO:0048770;GO:0065010;GO:0070062	DVQIILESCHNQNILGTILHPNGNITELLLK	31	3;4	1	DVQIILESC[125.0477]HNQNILGTILHPNGNITELLLK	DVQIILESC[130.0791]HNQNILGTILHPNGNITELLLK	C	NaN	NaN	0.0765494	NaN	NaN	NaN	NaN	NaN	NaN	NaN	NaN	NaN	-0.433555	-0.0405049	NaN	0.0810852	-1.29435	0.0241329	NaN	NaN	NaN	NaN	NaN	0.0725633	NaN	0.0798104	NaN	-0.0369207	NaN	-0.0842508	-0.25535
	+	0.138491	1.45432	-0.240146	O00159	Unconventional myosin-Ic	MYO1C	498	GO:0002376;GO:0006605;GO:0006612;GO:0006810;GO:0006886;GO:0006950;GO:0006952;GO:0006955;GO:0015031;GO:0015931;GO:0016043;GO:0030334;GO:0030335;GO:0032386;GO:0032388;GO:0032879;GO:0032880;GO:0033157;GO:0040012;GO:0040017;GO:0044087;GO:0045087;GO:0045184;GO:0046907;GO:0048518;GO:0048522;GO:0050657;GO:0050658;GO:0050789;GO:0050794;GO:0050896;GO:0051028;GO:0051049;GO:0051050;GO:0051128;GO:0051222;GO:…	GO:0000166;GO:0003774;GO:0003824;GO:0005102;GO:0005488;GO:0005515;GO:0005524;GO:0016462;GO:0016787;GO:0016817;GO:0016818;GO:0016887;GO:0017016;GO:0017076;GO:0017111;GO:0017160;GO:0019899;GO:0030554;GO:0030898;GO:0031267;GO:0032553;GO:0032555;GO:0032559;GO:0035639;GO:0042623;GO:0051020	GO:0001726;GO:0005643;GO:0005654;GO:0005730;GO:0005737;GO:0005739;GO:0005829;GO:0005886;GO:0005902;GO:0005903;GO:0009925;GO:0016020;GO:0016023;GO:0016328;GO:0016459;GO:0016461;GO:0031253;GO:0031410;GO:0031528;GO:0031941;GO:0031982;GO:0031988;GO:0032991;GO:0042995;GO:0043226;GO:0043227;GO:0043228;GO:0043229;GO:0043230;GO:0043231;GO:0043232;GO:0043234;GO:0044421;GO:0044422;GO:0044424;GO:0044425;GO:…	GIISILDEECLRPGEATDLTFLEK	24	3	1	GIISILDEEC[125.0477]LRPGEATDLTFLEK	GIISILDEEC[130.0791]LRPGEATDLTFLEK	C	1.92812	NaN	2.13186	NaN	1.78782	NaN	1.42043	NaN	0.627049	NaN	1.02727	NaN	2.55236	2.9942	1.42392	1.50987	1.59317	1.09728	1.86675	NaN	0.670013	NaN	1.78251	1.6623	1.77365	NaN	0.675017	NaN	1.49794	1.87071	1.61396
	+	0.0937778	1.70912	-0.246957	Q13011	Delta(3,5)-Delta(2,4)-dienoyl-CoA isomerase, mitochondrial	ECH1	187	GO:0006082;GO:0006629;GO:0006631;GO:0006635;GO:0008152;GO:0009056;GO:0009062;GO:0009987;GO:0016042;GO:0016054;GO:0019395;GO:0019752;GO:0030258;GO:0032787;GO:0034440;GO:0042180;GO:0043436;GO:0044237;GO:0044238;GO:0044242;GO:0044248;GO:0044255;GO:0044281;GO:0044282;GO:0046395;GO:0055114;GO:0072329	GO:0003824;GO:0005102;GO:0005488;GO:0005515;GO:0016853	GO:0005739;GO:0005777;GO:0016020;GO:0031982;GO:0031988;GO:0042579;GO:0043226;GO:0043227;GO:0043229;GO:0043230;GO:0043231;GO:0044421;GO:0044424;GO:0044444;GO:0044464;GO:0065010;GO:0070062	YCAQDAFFQVK	11	2	1	YC[125.0477]AQDAFFQVK	YC[130.0791]AQDAFFQVK	C	NaN	NaN	-0.63375	NaN	0.318959	-0.577763	-1.09662	-0.47553	NaN	NaN	-0.0445444	NaN	-0.300159	0.3251	-0.904095	0.163712	-0.227893	0.23278	-0.095854	NaN	NaN	-0.468856	NaN	-0.456951	-0.0636723	0.0791905	0.340515	0.497331	0.163788	0.0865242	-0.711796
+	+	0.00390361	3.51307	-0.247041	P29590	Protein PML	PML	338	GO:0001558;GO:0001666;GO:0001763;GO:0001932;GO:0002009;GO:0002230;GO:0002252;GO:0002376;GO:0002682;GO:0002697;GO:0002831;GO:0006139;GO:0006275;GO:0006282;GO:0006351;GO:0006355;GO:0006417;GO:0006461;GO:0006464;GO:0006468;GO:0006508;GO:0006511;GO:0006605;GO:0006606;GO:0006793;GO:0006796;GO:0006807;GO:0006810;GO:0006873;GO:0006874;GO:0006875;GO:0006886;GO:0006913;GO:0006915;GO:0006917;GO:0006919;GO:…	GO:0000988;GO:0000989;GO:0003676;GO:0003677;GO:0003712;GO:0003713;GO:0005488;GO:0005515;GO:0008270;GO:0019899;GO:0031625;GO:0032182;GO:0032183;GO:0042802;GO:0042803;GO:0043167;GO:0043169;GO:0046872;GO:0046914;GO:0046982;GO:0046983;GO:0050897	GO:0005634;GO:0005654;GO:0005730;GO:0005737;GO:0005829;GO:0010008;GO:0016020;GO:0016363;GO:0016604;GO:0016605;GO:0019898;GO:0031090;GO:0031312;GO:0031901;GO:0031965;GO:0042406;GO:0043226;GO:0043227;GO:0043228;GO:0043229;GO:0043231;GO:0043232;GO:0044422;GO:0044424;GO:0044425;GO:0044428;GO:0044432;GO:0044440;GO:0044444;GO:0044446;GO:0044451;GO:0044464	CYASDQEVLDMHGFLR	16	2	1	C[125.0477]YASDQEVLDMHGFLR	C[130.0791]YASDQEVLDMHGFLR	C	0.583168	NaN	1.02059	1.22381	NaN	NaN	NaN	0.862095	NaN	1.15632	NaN	1.26429	1.34654	1.37967	NaN	1.46112	0.931295	1.58133	NaN	NaN	NaN	1.32401	NaN	0.85565	0.996577	1.08521	NaN	NaN	0.705715	1.14175	0.766838
+	+	0.00878689	3.06407	-0.249151	Q9NVA2	Septin-11	SEPTIN11	268	GO:0006461;GO:0007049;GO:0009987;GO:0016043;GO:0022607;GO:0043933;GO:0051259;GO:0051291;GO:0051301;GO:0065003;GO:0071822;GO:0071840	GO:0000166;GO:0005488;GO:0005525;GO:0017076;GO:0019001;GO:0032553;GO:0032555;GO:0032561;GO:0035639	GO:0001725;GO:0005737;GO:0030054;GO:0030424;GO:0031982;GO:0031988;GO:0032432;GO:0042641;GO:0042995;GO:0043005;GO:0043197;GO:0043226;GO:0043227;GO:0043230;GO:0044309;GO:0044421;GO:0044422;GO:0044424;GO:0044430;GO:0044446;GO:0044463;GO:0044464;GO:0045202;GO:0065010;GO:0070062	QYPWGVVQVENENHCDFVK	19	3	1	QYPWGVVQVENENHC[125.0477]DFVK	QYPWGVVQVENENHC[130.0791]DFVK	C	NaN	NaN	1.01976	NaN	0.0817817	NaN	NaN	1.15824	NaN	0.25891	0.94732	0.873262	NaN	0.915563	1.44625	1.04609	0.680875	1.67137	0.990474	NaN	NaN	NaN	NaN	1.33646	0.707652	1.15433	NaN	NaN	0.232013	0.932252	0.588682
	+	0.117122	1.56028	-0.256518	P08697	Alpha-2-antiplasmin	SERPINF2	152	GO:0001775;GO:0001817;GO:0001819;GO:0001990;GO:0002034;GO:0002526;GO:0002576;GO:0003008;GO:0003013;GO:0003014;GO:0003018;GO:0003044;GO:0003071;GO:0003072;GO:0003073;GO:0003081;GO:0006355;GO:0006357;GO:0006810;GO:0006887;GO:0006950;GO:0006952;GO:0006953;GO:0006954;GO:0007596;GO:0007599;GO:0008217;GO:0008284;GO:0009611;GO:0009653;GO:0009889;GO:0009891;GO:0009893;GO:0009966;GO:0009967;GO:0009987;GO:…	GO:0002020;GO:0004857;GO:0004866;GO:0004867;GO:0005488;GO:0005515;GO:0019899;GO:0030234;GO:0030414;GO:0042802;GO:0042803;GO:0046983;GO:0061134;GO:0061135	GO:0005576;GO:0005577;GO:0005615;GO:0009986;GO:0031093;GO:0031974;GO:0031982;GO:0031983;GO:0031988;GO:0032991;GO:0034774;GO:0043226;GO:0043227;GO:0043230;GO:0043233;GO:0043234;GO:0044421;GO:0044422;GO:0044424;GO:0044433;GO:0044444;GO:0044446;GO:0044464;GO:0060205;GO:0065010;GO:0070062;GO:0072562	LCQDLGPGAFR	11	2	1	LC[125.0477]QDLGPGAFR	LC[130.0791]QDLGPGAFR	C	0.580072	-1.28402	-0.848319	-0.215151	-0.307478	-0.278471	-0.821869	0.376499	-0.655699	-0.45145	-0.438336	0.295616	-0.280201	NaN	-0.582387	NaN	NaN	NaN	-1.00303	-0.783255	NaN	0.268972	NaN	0.167693	NaN	NaN	-0.491983	-0.850384	-0.375263	0.0584172	-0.686512
	+	0.0684351	1.90198	-0.259235	Q15185	Prostaglandin E synthase 3	PTGES3	58	GO:0000038;GO:0000723;GO:0001516;GO:0006082;GO:0006139;GO:0006259;GO:0006260;GO:0006278;GO:0006457;GO:0006629;GO:0006631;GO:0006633;GO:0006636;GO:0006690;GO:0006692;GO:0006693;GO:0006807;GO:0006950;GO:0006996;GO:0007165;GO:0008152;GO:0008610;GO:0009058;GO:0009059;GO:0009266;GO:0009408;GO:0009628;GO:0009987;GO:0016043;GO:0016053;GO:0019369;GO:0019371;GO:0019538;GO:0019752;GO:0032200;GO:0032787;GO:…	GO:0003720;GO:0003824;GO:0003964;GO:0005488;GO:0005515;GO:0016740;GO:0016772;GO:0016779;GO:0016853;GO:0016860;GO:0034061;GO:0050220;GO:0051082	GO:0000781;GO:0005634;GO:0005654;GO:0005697;GO:0005737;GO:0005829;GO:0030529;GO:0031982;GO:0031988;GO:0032991;GO:0043226;GO:0043227;GO:0043229;GO:0043230;GO:0043231;GO:0044421;GO:0044422;GO:0044424;GO:0044427;GO:0044428;GO:0044444;GO:0044446;GO:0044464;GO:0065010;GO:0070062	HLNEIDLFHCIDPNDSK	17	2;3	1	HLNEIDLFHC[125.0477]IDPNDSK	HLNEIDLFHC[130.0791]IDPNDSK	C	0.505584	NaN	1.497	2.434	1.71584	1.68605	1.65224	1.36433	-1.80279	2.23948	1.22586	2.38058	1.66431	1.36593	1.28659	1.54769	1.02573	2.11303	1.12133	NaN	NaN	2.36533	0.916783	1.31585	1.34587	1.68875	0.660353	1.01936	1.60624	2.23123	1.41552
	+	0.162489	1.35293	-0.259358	O00159	Unconventional myosin-Ic	MYO1C	802	GO:0002376;GO:0006605;GO:0006612;GO:0006810;GO:0006886;GO:0006950;GO:0006952;GO:0006955;GO:0015031;GO:0015931;GO:0016043;GO:0030334;GO:0030335;GO:0032386;GO:0032388;GO:0032879;GO:0032880;GO:0033157;GO:0040012;GO:0040017;GO:0044087;GO:0045087;GO:0045184;GO:0046907;GO:0048518;GO:0048522;GO:0050657;GO:0050658;GO:0050789;GO:0050794;GO:0050896;GO:0051028;GO:0051049;GO:0051050;GO:0051128;GO:0051222;GO:…	GO:0000166;GO:0003774;GO:0003824;GO:0005102;GO:0005488;GO:0005515;GO:0005524;GO:0016462;GO:0016787;GO:0016817;GO:0016818;GO:0016887;GO:0017016;GO:0017076;GO:0017111;GO:0017160;GO:0019899;GO:0030554;GO:0030898;GO:0031267;GO:0032553;GO:0032555;GO:0032559;GO:0035639;GO:0042623;GO:0051020	GO:0001726;GO:0005643;GO:0005654;GO:0005730;GO:0005737;GO:0005739;GO:0005829;GO:0005886;GO:0005902;GO:0005903;GO:0009925;GO:0016020;GO:0016023;GO:0016328;GO:0016459;GO:0016461;GO:0031253;GO:0031410;GO:0031528;GO:0031941;GO:0031982;GO:0031988;GO:0032991;GO:0042995;GO:0043226;GO:0043227;GO:0043228;GO:0043229;GO:0043230;GO:0043231;GO:0043232;GO:0043234;GO:0044421;GO:0044422;GO:0044424;GO:0044425;GO:…	CPENAFFLDHVR	12	2	1	C[125.0477]PENAFFLDHVR	C[130.0791]PENAFFLDHVR	C	0.541332	NaN	2.65195	NaN	NaN	NaN	NaN	NaN	4.3895	NaN	2.23841	NaN	NaN	NaN	0.970502	0.921954	1.43259	NaN	0.42079	NaN	1.72241	2.14012	1.73549	NaN	0.87078	NaN	2.566	NaN	0.714748	NaN	0.382611
+	+	0.00572549	3.30161	-0.259925	Q96AT9	Ribulose-phosphate 3-epimerase	RPE	23	GO:0005975;GO:0005996;GO:0006006;GO:0006007;GO:0006066;GO:0006098;GO:0006139;GO:0006732;GO:0006733;GO:0006739;GO:0006740;GO:0006753;GO:0006807;GO:0008152;GO:0009052;GO:0009056;GO:0009117;GO:0009987;GO:0016052;GO:0019318;GO:0019320;GO:0019321;GO:0019323;GO:0019362;GO:0034641;GO:0044237;GO:0044238;GO:0044262;GO:0044275;GO:0044281;GO:0044282;GO:0046164;GO:0046365;GO:0046483;GO:0046496;GO:0051186;GO:…	GO:0003824;GO:0004750;GO:0005488;GO:0005515;GO:0016853;GO:0016854;GO:0016857;GO:0042802;GO:0042803;GO:0043167;GO:0043169;GO:0046872;GO:0046983	GO:0005829;GO:0031982;GO:0031988;GO:0043226;GO:0043227;GO:0043230;GO:0044421;GO:0044424;GO:0044444;GO:0044464;GO:0065010;GO:0070062	IGPSILNSDLANLGAECLR	19	2;3	1	IGPSILNSDLANLGAEC[125.0477]LR	IGPSILNSDLANLGAEC[130.0791]LR	C	0.211742	-0.321608	0.596492	0.476847	0.309706	0.643721	0.148117	0.644939	0.583408	0.391379	0.373792	0.406703	1.00426	0.281845	-0.0700412	0.414458	0.215071	0.584164	-0.15729	-0.468107	NaN	0.636641	-0.0744515	0.438746	0.756761	0.67473	-0.160241	0.742452	0.0273048	0.174929	0.339228
+	+	0.0450256	2.14617	-0.261638	P06744	Glucose-6-phosphate isomerase	GPI	404	GO:0001525;GO:0002376;GO:0003008;GO:0005975;GO:0005996;GO:0006006;GO:0006066;GO:0006081;GO:0006094;GO:0006139;GO:0006352;GO:0006367;GO:0006807;GO:0006955;GO:0006959;GO:0007599;GO:0007610;GO:0007611;GO:0008152;GO:0009056;GO:0009058;GO:0009438;GO:0009987;GO:0010466;GO:0010467;GO:0010941;GO:0016051;GO:0016070;GO:0019222;GO:0019242;GO:0019318;GO:0019319;GO:0032501;GO:0032502;GO:0032774;GO:0034637;GO:…	GO:0003824;GO:0004347;GO:0005488;GO:0005529;GO:0016853;GO:0016860;GO:0016861;GO:0016866;GO:0030246;GO:0048029	GO:0005615;GO:0005654;GO:0005737;GO:0005829;GO:0005886;GO:0016020;GO:0031982;GO:0031988;GO:0042995;GO:0043005;GO:0043226;GO:0043227;GO:0043230;GO:0044421;GO:0044422;GO:0044424;GO:0044428;GO:0044444;GO:0044446;GO:0044464;GO:0065010;GO:0070062	MIPCDFLIPVQTQHPIR	17	2;3	1	MIPC[125.0477]DFLIPVQTQHPIR	MIPC[130.0791]DFLIPVQTQHPIR	C	NaN	NaN	0.481732	NaN	-1.76854	NaN	0.310037	0.268306	NaN	1.02491	NaN	0.676624	0.192723	0.44316	1.5906	0.119259	-0.100554	0.0753729	NaN	NaN	NaN	0.952643	NaN	-0.00950707	0.194509	0.173043	NaN	-0.113025	NaN	NaN	-0.643786
	+	0.153374	1.38399	-0.264639	O15067	Phosphoribosylformylglycinamidine synthase	PFAS	66	GO:0006082;GO:0006139;GO:0006144;GO:0006163;GO:0006164;GO:0006188;GO:0006189;GO:0006520;GO:0006541;GO:0006725;GO:0006753;GO:0006807;GO:0008152;GO:0009058;GO:0009064;GO:0009112;GO:0009117;GO:0009123;GO:0009124;GO:0009126;GO:0009127;GO:0009150;GO:0009152;GO:0009156;GO:0009161;GO:0009165;GO:0009167;GO:0009168;GO:0009259;GO:0009260;GO:0009308;GO:0009987;GO:0018130;GO:0019752;GO:0034641;GO:0034654;GO:…	GO:0000166;GO:0003824;GO:0004642;GO:0005488;GO:0005524;GO:0016874;GO:0016879;GO:0016884;GO:0017076;GO:0030554;GO:0032553;GO:0032555;GO:0032559;GO:0035639;GO:0043167;GO:0043169;GO:0046872	GO:0005737;GO:0005829;GO:0031982;GO:0031988;GO:0043226;GO:0043227;GO:0043230;GO:0044421;GO:0044424;GO:0044444;GO:0044464;GO:0065010;GO:0070062	LMWLFGCPLLLDDVAR	16	2	1	LMWLFGC[125.0477]PLLLDDVAR	LMWLFGC[130.0791]PLLLDDVAR	C	NaN	NaN	NaN	NaN	NaN	0.0311984	NaN	-0.219896	NaN	0.737149	NaN	NaN	NaN	1.91165	NaN	0.746874	NaN	1.03063	NaN	NaN	NaN	NaN	-0.2697	NaN	NaN	NaN	0.158558	-0.422961	0.102565	NaN	NaN
+	+	0.000129032	4.96643	-0.264743	P13797	Plastin-3	PLS3	566	GO:0032502;GO:0048856;GO:0060348	GO:0005488;GO:0005509;GO:0043167;GO:0043169;GO:0046872	GO:0005737;GO:0044424;GO:0044464	DKTISSSLAVVDLIDAIQPGCINYDLVK	28	3	1	DKTISSSLAVVDLIDAIQPGC[125.0477]INYDLVK	DKTISSSLAVVDLIDAIQPGC[130.0791]INYDLVK	C	0.021405	NaN	0.381897	0.108365	0.0609558	0.152054	-0.086028	0.0594923	NaN	0.196658	0.0493505	0.385543	0.391377	0.496791	0.0680203	0.468884	0.240016	0.325206	NaN	NaN	NaN	0.29647	0.0718342	0.644542	0.239798	0.414649	0.313534	0.0859301	0.0434267	0.421701	0.00149255
	+	0.0653971	1.93801	-0.270873	O15143	Actin-related protein 2/3 complex subunit 1B	ARPC1B	26	GO:0006928;GO:0006996;GO:0007010;GO:0007015;GO:0008064;GO:0009987;GO:0010638;GO:0016043;GO:0030029;GO:0030036;GO:0030832;GO:0030833;GO:0030838;GO:0031334;GO:0032271;GO:0032273;GO:0032535;GO:0032956;GO:0032970;GO:0033043;GO:0034314;GO:0043254;GO:0044087;GO:0045010;GO:0048518;GO:0048522;GO:0050789;GO:0050794;GO:0051128;GO:0051130;GO:0051493;GO:0051495;GO:0065007;GO:0065008;GO:0071840;GO:0071841;GO:…	GO:0005198;GO:0005200	GO:0005737;GO:0005856;GO:0005885;GO:0005912;GO:0005924;GO:0005925;GO:0015629;GO:0030054;GO:0030055;GO:0031982;GO:0031988;GO:0032991;GO:0043226;GO:0043227;GO:0043228;GO:0043229;GO:0043230;GO:0043232;GO:0043234;GO:0044421;GO:0044422;GO:0044424;GO:0044430;GO:0044446;GO:0044464;GO:0065010;GO:0070062;GO:0070161	DRTQIAICPNNHEVHIYEK	19	4	1	DRTQIAIC[125.0477]PNNHEVHIYEK	DRTQIAIC[130.0791]PNNHEVHIYEK	C	NaN	NaN	-0.308811	NaN	NaN	-0.362448	NaN	NaN	NaN	NaN	-0.833691	-0.444178	-0.688274	-0.341579	NaN	-1.24004	-0.668704	-0.43395	NaN	NaN	-0.768667	-0.00331292	-0.716126	-1.37508	-0.36088	-0.445506	NaN	-0.840362	NaN	NaN	NaN
+	+	0	5.69443	-0.273822	Q9HC38	Glyoxalase domain-containing protein 4	GLOD4	171			GO:0005739;GO:0031982;GO:0031988;GO:0043226;GO:0043227;GO:0043229;GO:0043230;GO:0043231;GO:0044421;GO:0044424;GO:0044444;GO:0044464;GO:0065010;GO:0070062	SLNYWCNLLGMK	12	2	1	SLNYWC[125.0477]NLLGMK	SLNYWC[130.0791]NLLGMK	C	-1.37728	NaN	-0.863776	NaN	-1.45112	NaN	-1.11058	-0.942048	NaN	-1.26676	-1.15726	NaN	-1.56491	-0.838794	-0.912157	-0.729079	-0.789589	-0.834843	-0.73869	NaN	NaN	NaN	-1.07702	-0.291042	-1.041	-0.695293	-1.19126	-0.471862	-1.12083	-0.827836	-1.07478
+	+	0.00427586	3.46027	-0.274811	Q9UBV8	Peflin	PEF1	247	GO:0006508;GO:0008152;GO:0010035;GO:0010038;GO:0019538;GO:0042221;GO:0043170;GO:0044238;GO:0050896;GO:0051592	GO:0003824;GO:0004175;GO:0004197;GO:0004198;GO:0005488;GO:0005509;GO:0005515;GO:0008233;GO:0008234;GO:0016787;GO:0043167;GO:0043169;GO:0046872;GO:0046982;GO:0046983;GO:0070011	GO:0005737;GO:0016020;GO:0031982;GO:0031988;GO:0043226;GO:0043227;GO:0043230;GO:0044421;GO:0044424;GO:0044464;GO:0065010;GO:0070062	FIQVCTQLQVLTEAFR	16	2	1	FIQVC[125.0477]TQLQVLTEAFR	FIQVC[130.0791]TQLQVLTEAFR	C	-1.25099	NaN	-0.259585	-0.795408	-0.678181	-0.652713	-0.791839	-0.307916	-0.999351	-0.492879	-0.879397	NaN	NaN	NaN	-1.28952	-0.667032	-0.772009	-0.285402	-0.756582	NaN	-0.827008	-0.780204	-0.940042	0.146219	-0.758877	0.30722	-1.23273	NaN	-0.82761	NaN	-0.878651
	+	0.129653	1.49488	-0.276579	P60981	Destrin	DSTN	135	GO:0006996;GO:0007010;GO:0007015;GO:0008064;GO:0008154;GO:0009987;GO:0010638;GO:0016043;GO:0022411;GO:0030029;GO:0030036;GO:0030042;GO:0030832;GO:0030834;GO:0030836;GO:0032535;GO:0032956;GO:0032970;GO:0032984;GO:0033043;GO:0034621;GO:0034623;GO:0043241;GO:0043243;GO:0043244;GO:0043624;GO:0043933;GO:0048518;GO:0048522;GO:0050789;GO:0050794;GO:0051014;GO:0051128;GO:0051130;GO:0051261;GO:0051493;GO:…		GO:0005856;GO:0015629;GO:0030863;GO:0030864;GO:0031982;GO:0031988;GO:0043226;GO:0043227;GO:0043228;GO:0043229;GO:0043230;GO:0043232;GO:0044421;GO:0044422;GO:0044424;GO:0044430;GO:0044444;GO:0044446;GO:0044448;GO:0044464;GO:0065010;GO:0070062	FQGIKHECQANGPEDLNR	18	2;3	1	FQGIKHEC[125.0477]QANGPEDLNR	FQGIKHEC[130.0791]QANGPEDLNR	C	-0.224258	NaN	-0.426466	NaN	0.0695599	-0.0395647	-1.61403	2.45971	-0.0947509	-0.177266	0.440613	NaN	-0.0745847	1.69913	0.589378	-0.142888	0.0836869	2.82099	NaN	NaN	0.157205	0.831398	0.0344788	0.325344	1.11222	-0.903429	0.59196	-0.298765	-0.371267	-0.115286	-0.712762
	+	0.0999538	1.66631	-0.277583	P27348	14-3-3 protein theta	YWHAQ	25	GO:0006139;GO:0006352;GO:0006355;GO:0006367;GO:0006605;GO:0006807;GO:0006810;GO:0006886;GO:0006915;GO:0007165;GO:0007264;GO:0008152;GO:0008219;GO:0009058;GO:0009889;GO:0009890;GO:0009892;GO:0009987;GO:0010467;GO:0010468;GO:0010556;GO:0010558;GO:0010605;GO:0010629;GO:0012501;GO:0015031;GO:0016043;GO:0016070;GO:0016265;GO:0019219;GO:0019222;GO:0021762;GO:0031323;GO:0031324;GO:0031326;GO:0031327;GO:…	GO:0005488;GO:0005515;GO:0047485	GO:0005737;GO:0005829;GO:0005912;GO:0005924;GO:0005925;GO:0012506;GO:0016020;GO:0030054;GO:0030055;GO:0030659;GO:0031090;GO:0031982;GO:0031988;GO:0032991;GO:0043226;GO:0043227;GO:0043230;GO:0043234;GO:0044421;GO:0044422;GO:0044424;GO:0044433;GO:0044444;GO:0044446;GO:0044464;GO:0065010;GO:0070062;GO:0070161	AKLAEQAERYDDMATCMK	18	3	1	AKLAEQAERYDDMATC[125.0477]MK	AKLAEQAERYDDMATC[130.0791]MK	C	0.173209	NaN	-0.648968	0.232472	-0.258908	-0.0988038	0.218197	0.287923	0.438565	0.131472	0.115306	0.549997	NaN	0.700368	-0.353006	0.14589	-0.781373	0.360522	-0.34962	NaN	0.230192	0.864389	-0.313019	NaN	0.343835	0.459915	1.1789	0.648819	-0.317922	-0.211396	-0.268765
	+	0.12631	1.51394	-0.277952	P02675	Fibrinogen beta chain	FGB	316	GO:0001775;GO:0002376;GO:0002576;GO:0002791;GO:0002793;GO:0006461;GO:0006810;GO:0006887;GO:0006950;GO:0006952;GO:0006955;GO:0006959;GO:0007155;GO:0007160;GO:0007165;GO:0007596;GO:0007599;GO:0009607;GO:0009617;GO:0009719;GO:0009725;GO:0009966;GO:0009967;GO:0009987;GO:0010033;GO:0010035;GO:0010038;GO:0010470;GO:0010627;GO:0010646;GO:0010647;GO:0010740;GO:0010941;GO:0016043;GO:0016192;GO:0016337;GO:…	GO:0005198;GO:0005488;GO:0005515;GO:0051087	GO:0005576;GO:0005577;GO:0005615;GO:0005886;GO:0005938;GO:0009897;GO:0009986;GO:0016020;GO:0016023;GO:0030141;GO:0031091;GO:0031093;GO:0031410;GO:0031974;GO:0031982;GO:0031983;GO:0031988;GO:0032991;GO:0034774;GO:0043226;GO:0043227;GO:0043229;GO:0043230;GO:0043231;GO:0043233;GO:0043234;GO:0044421;GO:0044422;GO:0044424;GO:0044425;GO:0044433;GO:0044444;GO:0044446;GO:0044459;GO:0044464;GO:0060205;GO:…	NYCGLPGEYWLGNDK	15	2	1	NYC[125.0477]GLPGEYWLGNDK	NYC[130.0791]GLPGEYWLGNDK	C	-3.66891	-3.6983	-4.35727	NaN	-5.17462	-4.80503	-3.63135	-3.40796	NaN	-3.08449	-4.26907	NaN	-3.69334	-3.14424	-3.62154	-2.81116	-3.23912	-2.20328	-2.67687	-3.60412	NaN	NaN	-3.63341	-2.61462	-3.53786	-2.8251	-3.36398	-3.38537	-3.59191	-3.87803	-3.4065
+	+	0.0247333	2.49855	-0.278953	Q9Y3D6	Mitochondrial fission 1 protein	FIS1	41	GO:0000266;GO:0000422;GO:0001836;GO:0006461;GO:0006605;GO:0006626;GO:0006810;GO:0006839;GO:0006873;GO:0006874;GO:0006875;GO:0006886;GO:0006914;GO:0006944;GO:0006996;GO:0007005;GO:0007165;GO:0007204;GO:0008053;GO:0008152;GO:0008637;GO:0009056;GO:0009653;GO:0009987;GO:0010638;GO:0010821;GO:0010822;GO:0010952;GO:0015031;GO:0016043;GO:0016044;GO:0016559;GO:0017038;GO:0019222;GO:0019722;GO:0019725;GO:…	GO:0005102;GO:0005488;GO:0005515	GO:0005739;GO:0005777;GO:0005779;GO:0016020;GO:0016021;GO:0031224;GO:0031231;GO:0031300;GO:0031301;GO:0031306;GO:0031307;GO:0032592;GO:0032991;GO:0042579;GO:0043226;GO:0043227;GO:0043229;GO:0043231;GO:0043234;GO:0044422;GO:0044424;GO:0044425;GO:0044429;GO:0044438;GO:0044439;GO:0044444;GO:0044446;GO:0044455;GO:0044464	STQFEYAWCLVR	12	2	1	STQFEYAWC[125.0477]LVR	STQFEYAWC[130.0791]LVR	C	0.656556	NaN	0.721169	NaN	1.04845	0.711735	0.581189	0.462842	NaN	0.909057	0.53561	0.453862	NaN	0.903837	0.312468	1.38903	0.997355	1.07119	0.540461	NaN	NaN	0.959562	NaN	NaN	1.28239	1.36825	1.05751	NaN	0.531121	0.523954	1.09576
	+	0.079557	1.80784	-0.280552	P00734	Prothrombin	F2	234	GO:0001558;GO:0001775;GO:0001932;GO:0001934;GO:0002376;GO:0002526;GO:0006464;GO:0006508;GO:0006873;GO:0006874;GO:0006875;GO:0006928;GO:0006950;GO:0006952;GO:0006953;GO:0006954;GO:0007165;GO:0007166;GO:0007275;GO:0007596;GO:0007597;GO:0007599;GO:0008152;GO:0008284;GO:0008360;GO:0009611;GO:0009889;GO:0009891;GO:0009892;GO:0009893;GO:0009966;GO:0009967;GO:0009987;GO:0010468;GO:0010522;GO:0010524;GO:…	GO:0003824;GO:0004175;GO:0004252;GO:0004871;GO:0004872;GO:0005102;GO:0005488;GO:0005509;GO:0005515;GO:0008083;GO:0008233;GO:0008236;GO:0016787;GO:0017171;GO:0038023;GO:0043167;GO:0043169;GO:0046872;GO:0060089;GO:0070011;GO:0070053	GO:0005576;GO:0005615;GO:0005788;GO:0005796;GO:0005886;GO:0016020;GO:0031974;GO:0031982;GO:0031988;GO:0043226;GO:0043227;GO:0043230;GO:0043233;GO:0044421;GO:0044422;GO:0044424;GO:0044431;GO:0044432;GO:0044444;GO:0044446;GO:0044464;GO:0065010;GO:0070013;GO:0070062;GO:0072562	LAVTTHGLPCLAWASAQAK	19	2;3	1	LAVTTHGLPC[125.0477]LAWASAQAK	LAVTTHGLPC[130.0791]LAWASAQAK	C	-3.01136	-3.40244	-2.66402	-2.2916	-3.21204	-2.58912	-3.24509	-2.66108	-2.60489	-2.66834	-3.10519	NaN	NaN	-1.88689	-3.00741	NaN	-2.24709	NaN	-2.68414	-2.93859	-2.7209	-2.23143	-1.9926	-2.68204	-3.17658	NaN	-2.98285	-1.8029	-3.38933	-2.86438	-2.69585
+	+	0.0306392	2.38871	-0.284255	P02763	Alpha-1-acid glycoprotein 1	ORM1	165	GO:0001817;GO:0001818;GO:0002526;GO:0002682;GO:0006810;GO:0006950;GO:0006952;GO:0006953;GO:0006954;GO:0009611;GO:0032675;GO:0032680;GO:0032715;GO:0032720;GO:0048519;GO:0050789;GO:0050896;GO:0051234;GO:0051239;GO:0051241;GO:0065007		GO:0005576;GO:0005615;GO:0031982;GO:0031988;GO:0043226;GO:0043227;GO:0043230;GO:0044421;GO:0065010;GO:0070062;GO:0072562	EQLGEFYEALDCLR	14	2	1	EQLGEFYEALDC[125.0477]LR	EQLGEFYEALDC[130.0791]LR	C	-3.61738	-4.39682	-4.1574	-2.43616	-3.82571	-2.42067	-4.31961	-2.99612	-2.89265	-3.81496	-4.08676	NaN	-3.66217	-1.66344	-3.32399	-3.08926	-2.73843	NaN	-3.63881	-3.36102	NaN	-3.04259	-4.61423	-3.02437	-3.41314	-2.60281	-3.7554	-2.47438	-4.01122	-3.74598	-3.31832
	+	0.174095	1.30874	-0.285419	P12277	Creatine kinase B-type	CKB	283	GO:0006082;GO:0006520;GO:0006575;GO:0006599;GO:0006600;GO:0006807;GO:0006873;GO:0008152;GO:0009308;GO:0009987;GO:0019725;GO:0019752;GO:0021762;GO:0030002;GO:0030320;GO:0030644;GO:0032502;GO:0034641;GO:0042180;GO:0042592;GO:0043436;GO:0044106;GO:0044237;GO:0044238;GO:0044281;GO:0048856;GO:0048878;GO:0050801;GO:0055064;GO:0055081;GO:0055082;GO:0055083;GO:0065007;GO:0065008	GO:0000166;GO:0003824;GO:0004111;GO:0005488;GO:0005515;GO:0005524;GO:0016301;GO:0016740;GO:0016772;GO:0016775;GO:0017076;GO:0019899;GO:0030554;GO:0031625;GO:0032553;GO:0032555;GO:0032559;GO:0035639	GO:0005739;GO:0005829;GO:0031982;GO:0031988;GO:0043226;GO:0043227;GO:0043229;GO:0043230;GO:0043231;GO:0044421;GO:0044424;GO:0044444;GO:0044464;GO:0065010;GO:0070062	DYEFMWNPHLGYILTCPSNLGTGLR	25	3	1	DYEFMWNPHLGYILTC[125.0477]PSNLGTGLR	DYEFMWNPHLGYILTC[130.0791]PSNLGTGLR	C	-0.893764	-0.899943	-1.03574	NaN	NaN	-1.57873	-1.14437	-0.613483	NaN	-0.981837	-1.06093	NaN	NaN	0.639082	NaN	NaN	-0.510287	-3.3558	NaN	NaN	NaN	NaN	-1.17991	-0.564993	-0.180967	-0.524781	NaN	NaN	-0.622514	NaN	-0.772586
+	+	0.00216667	3.76788	-0.286387	P84243	Histone H3.3	H3-3B	111	GO:0000183;GO:0001558;GO:0006139;GO:0006259;GO:0006304;GO:0006305;GO:0006306;GO:0006325;GO:0006333;GO:0006334;GO:0006336;GO:0006342;GO:0006355;GO:0006730;GO:0006807;GO:0006996;GO:0007165;GO:0007264;GO:0007596;GO:0007599;GO:0008152;GO:0009889;GO:0009890;GO:0009892;GO:0009987;GO:0010467;GO:0010468;GO:0010556;GO:0010558;GO:0010605;GO:0010629;GO:0016043;GO:0016458;GO:0019219;GO:0019222;GO:0022607;GO:…	GO:0000975;GO:0000976;GO:0000977;GO:0000979;GO:0000980;GO:0001012;GO:0001046;GO:0001047;GO:0001067;GO:0001158;GO:0003676;GO:0003677;GO:0003682;GO:0005488;GO:0005515;GO:0031490;GO:0031491;GO:0031492;GO:0035326;GO:0042393;GO:0043565;GO:0043566;GO:0044212	GO:0000228;GO:0000786;GO:0000788;GO:0005576;GO:0005634;GO:0005654;GO:0005694;GO:0031982;GO:0031988;GO:0032991;GO:0032993;GO:0043226;GO:0043227;GO:0043228;GO:0043229;GO:0043230;GO:0043231;GO:0043232;GO:0043234;GO:0044421;GO:0044422;GO:0044424;GO:0044427;GO:0044428;GO:0044446;GO:0044454;GO:0044464;GO:0065010;GO:0070062	FQSAAIGALQEASEAYLVGLFEDTNLCAIHAK	32	3;4	1	FQSAAIGALQEASEAYLVGLFEDTNLC[125.0477]AIHAK	FQSAAIGALQEASEAYLVGLFEDTNLC[130.0791]AIHAK	C	NaN	NaN	0.614209	NaN	NaN	0.683321	NaN	NaN	NaN	0.659369	NaN	NaN	0.704411	0.879021	0.0929973	0.711131	0.122276	0.767433	-0.421816	NaN	NaN	NaN	-0.561914	0.378332	0.860857	0.833322	0.521009	NaN	-0.168187	-0.138034	0.155852
+	+	0.0278289	2.43944	-0.28665	P60981	Destrin	DSTN	46	GO:0006996;GO:0007010;GO:0007015;GO:0008064;GO:0008154;GO:0009987;GO:0010638;GO:0016043;GO:0022411;GO:0030029;GO:0030036;GO:0030042;GO:0030832;GO:0030834;GO:0030836;GO:0032535;GO:0032956;GO:0032970;GO:0032984;GO:0033043;GO:0034621;GO:0034623;GO:0043241;GO:0043243;GO:0043244;GO:0043624;GO:0043933;GO:0048518;GO:0048522;GO:0050789;GO:0050794;GO:0051014;GO:0051128;GO:0051130;GO:0051261;GO:0051493;GO:…		GO:0005856;GO:0015629;GO:0030863;GO:0030864;GO:0031982;GO:0031988;GO:0043226;GO:0043227;GO:0043228;GO:0043229;GO:0043230;GO:0043232;GO:0044421;GO:0044422;GO:0044424;GO:0044430;GO:0044444;GO:0044446;GO:0044448;GO:0044464;GO:0065010;GO:0070062	CIIVEEGK	8	2	1	C[125.0477]IIVEEGK		C	1.37785	NaN	1.70021	NaN	1.83528	1.7762	2.00578	1.64031	NaN	1.99354	NaN	1.85541	2.97369	NaN	1.65581	2.52724	2.02097	2.15845	1.79742	NaN	NaN	NaN	0.931668	2.19322	1.93329	1.6659	1.46068	NaN	2.21294	2.383	2.18462
+	+	0.00772881	3.11895	-0.286904	P0DMV8	Heat shock 70 kDa protein 1A	HSPA1A	603				ELEQVCNPIISGLYQGAGGPGPGGFGAQGPK	31	3	1	ELEQVC[125.0477]NPIISGLYQGAGGPGPGGFGAQGPK	ELEQVC[130.0791]NPIISGLYQGAGGPGPGGFGAQGPK	C	0.313898	NaN	0.25752	0.904976	0.134923	0.246414	0.366807	0.861063	NaN	-0.101558	0.135757	-0.0935415	-0.200633	-0.149727	0.211702	-0.489943	-1.47356	0.129235	-0.0295763	NaN	NaN	0.875391	NaN	0.0133886	-0.351986	-0.696249	1.07829	NaN	-0.28905	-0.121931	-0.626199
+	+	0.00859504	3.07832	-0.288748	P35237	Serpin B6	SERPINB6	100	GO:0003008;GO:0006950;GO:0006970;GO:0007600;GO:0007605;GO:0009628;GO:0009987;GO:0010466;GO:0010951;GO:0019222;GO:0032501;GO:0033554;GO:0043086;GO:0044092;GO:0050789;GO:0050790;GO:0050877;GO:0050896;GO:0050954;GO:0051336;GO:0051346;GO:0051716;GO:0052547;GO:0052548;GO:0065007;GO:0065009;GO:0071214;GO:0071470	GO:0002020;GO:0004857;GO:0004866;GO:0004867;GO:0005488;GO:0005515;GO:0019899;GO:0030234;GO:0030414;GO:0061134;GO:0061135	GO:0005615;GO:0005737;GO:0005829;GO:0031982;GO:0031988;GO:0032991;GO:0043226;GO:0043227;GO:0043230;GO:0043234;GO:0044421;GO:0044424;GO:0044444;GO:0044464;GO:0065010;GO:0070062	SCDFLSSFR	9	2	1	SC[125.0477]DFLSSFR	SC[130.0791]DFLSSFR	C	-0.712885	NaN	-0.515231	NaN	-1.20735	-0.503032	-0.602382	-0.323122	NaN	NaN	-0.228052	-0.541612	-0.419381	-0.0557337	-0.346808	-0.282179	-0.739595	-0.0623117	-0.573046	NaN	NaN	-0.304983	-0.93726	-0.265773	-0.558877	-0.131158	-0.0490665	-0.152232	-0.62178	-0.10713	-0.760088
	+	0.101307	1.65416	-0.288881	O00151	PDZ and LIM domain protein 1	PDLIM1	45	GO:0001666;GO:0006355;GO:0006950;GO:0006979;GO:0009889;GO:0010468;GO:0010556;GO:0019219;GO:0019222;GO:0031323;GO:0031326;GO:0042221;GO:0050789;GO:0050794;GO:0050896;GO:0051171;GO:0051252;GO:0060255;GO:0065007;GO:0070482;GO:0080090;GO:2000112	GO:0000988;GO:0000989;GO:0003712;GO:0003713;GO:0005488;GO:0008270;GO:0043167;GO:0043169;GO:0046872;GO:0046914	GO:0005667;GO:0005737;GO:0005856;GO:0005912;GO:0005924;GO:0005925;GO:0030054;GO:0030055;GO:0032991;GO:0043226;GO:0043228;GO:0043229;GO:0043232;GO:0043234;GO:0044422;GO:0044424;GO:0044428;GO:0044446;GO:0044451;GO:0044464;GO:0070161	AALANLCIGDVITAIDGENTSNMTHLEAQNR	31	3;4	1	AALANLC[125.0477]IGDVITAIDGENTSNMTHLEAQNR	AALANLC[130.0791]IGDVITAIDGENTSNMTHLEAQNR	C	0.540601	NaN	0.360621	0.512604	0.305291	0.673699	0.604672	0.697259	0.703821	0.851305	0.397829	0.0823268	0.632558	0.510613	0.537537	0.896502	0.804815	0.90044	0.452455	NaN	0.986042	0.927246	0.466981	0.545936	0.634622	0.341792	0.9668	2.88187	0.65974	0.794236	0.360216
+	+	0.0491803	2.09368	-0.292139	P30086	Phosphatidylethanolamine-binding protein 1	PEBP1	133		GO:0000166;GO:0004857;GO:0004866;GO:0004867;GO:0005488;GO:0005515;GO:0005524;GO:0005543;GO:0008289;GO:0008429;GO:0017076;GO:0019899;GO:0019900;GO:0019901;GO:0030234;GO:0030414;GO:0030554;GO:0032553;GO:0032555;GO:0032559;GO:0035639;GO:0061134;GO:0061135	GO:0005634;GO:0005737;GO:0031982;GO:0031988;GO:0043226;GO:0043227;GO:0043229;GO:0043230;GO:0043231;GO:0044421;GO:0044424;GO:0044464;GO:0065010;GO:0070062	CDEPILSNR	9	2	1	C[125.0477]DEPILSNR	C[130.0791]DEPILSNR	C	-0.153221	NaN	0.260996	-0.966368	-1.52741	-0.899776	-0.473204	-0.168783	-0.747774	0.417492	-0.665475	-1.92743	-0.361604	0.465337	-0.93162	0.221884	0.502265	0.594715	-1.32988	0.192405	0.4724	0.554712	0.689381	0.544964	0.549979	0.806562	0.241167	0.828389	0.0820048	0.331512	0.21031
+	+	0.0035	3.57141	-0.295401	P27348	14-3-3 protein theta	YWHAQ	94	GO:0006139;GO:0006352;GO:0006355;GO:0006367;GO:0006605;GO:0006807;GO:0006810;GO:0006886;GO:0006915;GO:0007165;GO:0007264;GO:0008152;GO:0008219;GO:0009058;GO:0009889;GO:0009890;GO:0009892;GO:0009987;GO:0010467;GO:0010468;GO:0010556;GO:0010558;GO:0010605;GO:0010629;GO:0012501;GO:0015031;GO:0016043;GO:0016070;GO:0016265;GO:0019219;GO:0019222;GO:0021762;GO:0031323;GO:0031324;GO:0031326;GO:0031327;GO:…	GO:0005488;GO:0005515;GO:0047485	GO:0005737;GO:0005829;GO:0005912;GO:0005924;GO:0005925;GO:0012506;GO:0016020;GO:0030054;GO:0030055;GO:0030659;GO:0031090;GO:0031982;GO:0031988;GO:0032991;GO:0043226;GO:0043227;GO:0043230;GO:0043234;GO:0044421;GO:0044422;GO:0044424;GO:0044433;GO:0044444;GO:0044446;GO:0044464;GO:0065010;GO:0070062;GO:0070161	SICTTVLELLDK	12	2	1	SIC[125.0477]TTVLELLDK	SIC[130.0791]TTVLELLDK	C	-0.252549	0.0815928	-0.276105	-0.061847	-0.272332	-0.22981	-0.288301	-0.24592	0.417579	-0.374821	-0.0885459	-0.0277933	0.527617	0.0684426	0.0251277	0.526744	1.22516	-0.0844411	-0.193109	-0.713264	-0.0819335	-0.277627	-0.321995	1.79652	-0.227621	-0.153359	-0.319311	0.229361	-0.411768	-0.71673	-0.762611
+	+	0.00871545	3.0639	-0.300221	P36578	60S ribosomal protein L4	RPL4	125	GO:0000184;GO:0000956;GO:0006139;GO:0006401;GO:0006402;GO:0006412;GO:0006413;GO:0006414;GO:0006415;GO:0006605;GO:0006612;GO:0006613;GO:0006614;GO:0006807;GO:0006810;GO:0006886;GO:0008152;GO:0009056;GO:0009057;GO:0009058;GO:0009059;GO:0009987;GO:0010467;GO:0015031;GO:0016032;GO:0016043;GO:0016070;GO:0016071;GO:0019058;GO:0019083;GO:0019538;GO:0022411;GO:0022414;GO:0022415;GO:0032774;GO:0032984;GO:…	GO:0003676;GO:0003723;GO:0003735;GO:0005198;GO:0005488	GO:0005634;GO:0005730;GO:0005737;GO:0005829;GO:0005912;GO:0005924;GO:0005925;GO:0015934;GO:0016020;GO:0022625;GO:0030054;GO:0030055;GO:0030529;GO:0031982;GO:0031988;GO:0032991;GO:0043226;GO:0043227;GO:0043228;GO:0043229;GO:0043230;GO:0043231;GO:0043232;GO:0044421;GO:0044422;GO:0044424;GO:0044428;GO:0044444;GO:0044446;GO:0044464;GO:0065010;GO:0070062;GO:0070161	YAICSALAASALPALVMSK	19	2;3	1	YAIC[125.0477]SALAASALPALVMSK	YAIC[130.0791]SALAASALPALVMSK	C	-2.17439	-1.52711	-2.36737	NaN	NaN	NaN	-2.85423	NaN	NaN	NaN	NaN	-1.88496	NaN	-1.05461	NaN	-2.0275	-1.33899	-0.863121	-1.67068	-1.09987	NaN	NaN	-1.46027	-0.740465	-1.61293	-1.67661	-1.74728	-1.64895	-1.84874	-1.79747	-1.74679
	+	0.174157	1.30925	-0.304675	Q9UL25	Ras-related protein Rab-21	RAB21	177	GO:0006810;GO:0006886;GO:0007165;GO:0007264;GO:0007265;GO:0008152;GO:0009987;GO:0015031;GO:0017157;GO:0030100;GO:0032386;GO:0032388;GO:0032482;GO:0032879;GO:0035556;GO:0045184;GO:0045807;GO:0046907;GO:0048259;GO:0048260;GO:0048518;GO:0048522;GO:0050789;GO:0050794;GO:0050896;GO:0051046;GO:0051049;GO:0051050;GO:0051128;GO:0051130;GO:0051234;GO:0051649;GO:0051716;GO:0060341;GO:0060627;GO:0065007;GO:…	GO:0000166;GO:0003824;GO:0003924;GO:0005488;GO:0005525;GO:0016462;GO:0016787;GO:0016817;GO:0016818;GO:0017076;GO:0017111;GO:0019001;GO:0019003;GO:0032553;GO:0032555;GO:0032561;GO:0035639	GO:0000139;GO:0005768;GO:0005789;GO:0005802;GO:0005912;GO:0005924;GO:0005925;GO:0009898;GO:0012506;GO:0016020;GO:0030054;GO:0030055;GO:0030659;GO:0031090;GO:0031982;GO:0031988;GO:0032154;GO:0032155;GO:0032580;GO:0043226;GO:0043227;GO:0043229;GO:0043230;GO:0043231;GO:0044421;GO:0044422;GO:0044424;GO:0044425;GO:0044431;GO:0044432;GO:0044433;GO:0044444;GO:0044446;GO:0044459;GO:0044464;GO:0065010;GO:…	GIEELFLDLCK	11	2	1	GIEELFLDLC[125.0477]K	GIEELFLDLC[130.0791]K	C	0.423923	NaN	0.361004	NaN	NaN	NaN	0.42552	NaN	NaN	NaN	-1.03406	NaN	NaN	1.22722	NaN	0.233177	0.331957	1.04112	0.445668	NaN	NaN	NaN	0.282652	NaN	0.508152	0.187221	NaN	0.0507524	0.158845	NaN	NaN
	+	0.129209	1.49854	-0.304719	P13796	Plastin-2	LCP1	101	GO:0001775;GO:0002252;GO:0002263;GO:0002285;GO:0002286;GO:0002366;GO:0002376;GO:0006928;GO:0006996;GO:0007010;GO:0007015;GO:0007165;GO:0007243;GO:0009653;GO:0009887;GO:0009987;GO:0010737;GO:0016043;GO:0016477;GO:0022411;GO:0022607;GO:0022617;GO:0030029;GO:0030036;GO:0030198;GO:0031099;GO:0031100;GO:0031334;GO:0032386;GO:0032502;GO:0032879;GO:0032880;GO:0033157;GO:0035556;GO:0040011;GO:0042110;GO:…	GO:0003779;GO:0005488;GO:0005509;GO:0005515;GO:0008092;GO:0019899;GO:0043167;GO:0043169;GO:0046872;GO:0051015;GO:0051020	GO:0001726;GO:0001891;GO:0002102;GO:0005615;GO:0005737;GO:0005829;GO:0005856;GO:0005884;GO:0005886;GO:0005912;GO:0005924;GO:0005925;GO:0015629;GO:0016020;GO:0030054;GO:0030055;GO:0030175;GO:0031253;GO:0031256;GO:0031982;GO:0031988;GO:0032432;GO:0032587;GO:0032991;GO:0042995;GO:0043226;GO:0043227;GO:0043228;GO:0043229;GO:0043230;GO:0043232;GO:0043234;GO:0044421;GO:0044422;GO:0044424;GO:0044425;GO:…	EGICAIGGTSEQSSVGTQHSYSEEEK	26	3	1	EGIC[125.0477]AIGGTSEQSSVGTQHSYSEEEK	EGIC[130.0791]AIGGTSEQSSVGTQHSYSEEEK	C	-0.484219	NaN	-0.263955	NaN	NaN	NaN	NaN	-0.21026	NaN	-0.375531	-0.473819	0.477476	-0.168948	NaN	NaN	-0.0799004	-0.405858	0.0712114	NaN	NaN	-0.86296	0.80061	-1.01325	NaN	-0.637182	NaN	NaN	-0.946787	NaN	NaN	-1.03445
+	+	0.0337143	2.34595	-0.307482	P02748	Complement component C9	C9	181	GO:0001897;GO:0001906;GO:0001907;GO:0002252;GO:0002253;GO:0002376;GO:0002673;GO:0002682;GO:0002684;GO:0002697;GO:0002920;GO:0006950;GO:0006952;GO:0006955;GO:0006956;GO:0006957;GO:0006958;GO:0006959;GO:0008152;GO:0010468;GO:0019222;GO:0019538;GO:0019836;GO:0030449;GO:0031347;GO:0031640;GO:0032101;GO:0035821;GO:0043170;GO:0044003;GO:0044004;GO:0044179;GO:0044238;GO:0044419;GO:0045087;GO:0048518;GO:…		GO:0005576;GO:0005579;GO:0005737;GO:0005886;GO:0005887;GO:0016020;GO:0016021;GO:0031224;GO:0031226;GO:0031982;GO:0031988;GO:0032991;GO:0043226;GO:0043227;GO:0043230;GO:0043234;GO:0044421;GO:0044424;GO:0044425;GO:0044459;GO:0044464;GO:0046930;GO:0065010;GO:0070062;GO:0072562	TAGYGINILGMDPLSTPFDNEFYNGLCNR	29	3	1	TAGYGINILGMDPLSTPFDNEFYNGLC[125.0477]NR	TAGYGINILGMDPLSTPFDNEFYNGLC[130.0791]NR	C	NaN	-3.47848	-3.69037	NaN	NaN	NaN	-3.50438	NaN	NaN	-2.76279	-3.557	NaN	-2.6836	-2.35305	-3.16799	-2.982	-2.70602	NaN	-2.89217	-3.19599	NaN	NaN	-3.67872	NaN	-3.26582	NaN	-3.05874	-1.58608	-3.45759	-3.34052	-3.52444
+	+	0.0221988	2.56503	-0.308883	P12111	Collagen alpha-3(VI) chain	COL6A3	1825	GO:0006935;GO:0007155;GO:0007411;GO:0007517;GO:0008152;GO:0009605;GO:0009987;GO:0016043;GO:0022411;GO:0022610;GO:0022617;GO:0030198;GO:0030574;GO:0032501;GO:0032502;GO:0032963;GO:0040011;GO:0042221;GO:0042330;GO:0043062;GO:0043170;GO:0044236;GO:0044243;GO:0044259;GO:0048513;GO:0048856;GO:0050896;GO:0061061;GO:0071840;GO:0071841;GO:0071842;GO:0071845	GO:0004857;GO:0004866;GO:0004867;GO:0030234;GO:0030414;GO:0061134;GO:0061135	GO:0005576;GO:0005578;GO:0005581;GO:0005589;GO:0005615;GO:0005788;GO:0005886;GO:0016020;GO:0030934;GO:0031012;GO:0031974;GO:0031982;GO:0031988;GO:0042383;GO:0043226;GO:0043227;GO:0043230;GO:0043233;GO:0044420;GO:0044421;GO:0044422;GO:0044424;GO:0044432;GO:0044444;GO:0044446;GO:0044464;GO:0065010;GO:0070013;GO:0070062	VGNVQELSELSEQVLETLHDAMHETLCPGVTDAAK	35	3;4	1	VGNVQELSELSEQVLETLHDAMHETLC[125.0477]PGVTDAAK	VGNVQELSELSEQVLETLHDAMHETLC[130.0791]PGVTDAAK	C	-2.24469	-3.33709	-2.90252	NaN	-3.38182	-2.36621	-2.90105	-1.58771	-2.84772	-2.5376	-2.88352	-0.651341	-2.63792	-2.06523	-2.72085	-2.60323	-2.60122	-0.594984	-2.4766	NaN	-2.23104	-1.90556	-3.26304	-2.40403	-2.59644	-1.57971	-2.1786	-1.4754	-3.64884	-2.95282	-2.56185
+	+	0.0409302	2.21952	-0.313459	P01023	Alpha-2-macroglobulin	A2M	1127	GO:0001775;GO:0001868;GO:0001869;GO:0002576;GO:0002673;GO:0002682;GO:0002683;GO:0002697;GO:0002698;GO:0002920;GO:0002921;GO:0006810;GO:0006887;GO:0007165;GO:0007264;GO:0007596;GO:0007597;GO:0007599;GO:0008152;GO:0009892;GO:0009966;GO:0009987;GO:0010466;GO:0010468;GO:0010605;GO:0010951;GO:0010955;GO:0016043;GO:0016192;GO:0019222;GO:0019538;GO:0022411;GO:0022617;GO:0023051;GO:0030154;GO:0030168;GO:…	GO:0002020;GO:0004857;GO:0004866;GO:0004867;GO:0005102;GO:0005488;GO:0005515;GO:0019838;GO:0019899;GO:0019955;GO:0019956;GO:0019958;GO:0019959;GO:0019966;GO:0030234;GO:0030414;GO:0043120;GO:0048306;GO:0061134;GO:0061135	GO:0005576;GO:0005829;GO:0031093;GO:0031974;GO:0031982;GO:0031983;GO:0031988;GO:0034774;GO:0043226;GO:0043227;GO:0043230;GO:0043233;GO:0044421;GO:0044422;GO:0044424;GO:0044433;GO:0044444;GO:0044446;GO:0044464;GO:0060205;GO:0065010;GO:0070062;GO:0072562	NALFCLESAWK	11	2	1	NALFC[125.0477]LESAWK	NALFC[130.0791]LESAWK	C	-3.48172	-3.66135	-3.24077	NaN	-2.19932	-2.66414	-3.4706	-2.4509	NaN	-1.53499	-3.26901	NaN	-2.47778	-1.91688	-2.87437	-2.83013	-2.38618	-1.35534	-4.29884	NaN	NaN	-3.23931	-2.6921	-0.732316	-2.92355	-1.53977	-3.29007	-1.66896	-3.34085	-3.12992	-2.1772
+	+	0.00752727	3.16422	-0.31805	P05556	Integrin beta-1	ITGB1	301	GO:0000082;GO:0000902;GO:0000904;GO:0001701;GO:0001708;GO:0001775;GO:0001894;GO:0001932;GO:0001934;GO:0002042;GO:0002376;GO:0002521;GO:0002682;GO:0003008;GO:0006810;GO:0006873;GO:0006874;GO:0006875;GO:0006886;GO:0006928;GO:0006935;GO:0006950;GO:0006952;GO:0006968;GO:0006996;GO:0007010;GO:0007043;GO:0007154;GO:0007155;GO:0007156;GO:0007159;GO:0007160;GO:0007161;GO:0007165;GO:0007166;GO:0007229;GO:…	GO:0001618;GO:0002020;GO:0003779;GO:0004872;GO:0005488;GO:0005515;GO:0008092;GO:0019899;GO:0042277;GO:0043167;GO:0043169;GO:0046872;GO:0046982;GO:0046983;GO:0050839	GO:0001669;GO:0001726;GO:0005604;GO:0005737;GO:0005768;GO:0005886;GO:0005911;GO:0005912;GO:0005924;GO:0005925;GO:0008305;GO:0009897;GO:0009986;GO:0014704;GO:0016020;GO:0016023;GO:0030027;GO:0030054;GO:0030055;GO:0030056;GO:0030141;GO:0030175;GO:0031253;GO:0031256;GO:0031410;GO:0031594;GO:0031982;GO:0031988;GO:0032154;GO:0032155;GO:0032587;GO:0032991;GO:0034665;GO:0034666;GO:0034667;GO:0034677;GO:…	LGGIVLPNDGQCHLENNMYTMSHYYDYPSIAHLVQK	36	4;5	1	LGGIVLPNDGQC[125.0477]HLENNMYTMSHYYDYPSIAHLVQK	LGGIVLPNDGQC[130.0791]HLENNMYTMSHYYDYPSIAHLVQK	C	-2.93986	-3.05229	-3.39757	-1.895	-3.90168	-2.73398	-3.10168	-2.21081	-3.07981	-2.18984	-2.85812	NaN	NaN	-2.26278	-2.43913	-2.67965	-2.10526	NaN	NaN	NaN	NaN	-2.6701	-2.90102	NaN	-3.18127	-2.4708	-2.99133	-0.978486	-3.37226	-3.2525	-3.12729
+	+	0.0427803	2.18568	-0.318487	P46940	Ras GTPase-activating-like protein IQGAP1	IQGAP1	524	GO:0001817;GO:0001932;GO:0002064;GO:0002791;GO:0006091;GO:0006112;GO:0006140;GO:0007165;GO:0007166;GO:0007167;GO:0007169;GO:0007173;GO:0007264;GO:0008152;GO:0008543;GO:0009719;GO:0009892;GO:0009894;GO:0009987;GO:0010033;GO:0010035;GO:0010038;GO:0010563;GO:0010646;GO:0015980;GO:0019219;GO:0019220;GO:0019222;GO:0023051;GO:0030811;GO:0031323;GO:0031324;GO:0031329;GO:0031399;GO:0032268;GO:0032502;GO:…	GO:0004857;GO:0005095;GO:0005096;GO:0005488;GO:0005509;GO:0005515;GO:0005516;GO:0005543;GO:0005547;GO:0008047;GO:0008289;GO:0019207;GO:0019209;GO:0019887;GO:0019899;GO:0019900;GO:0019901;GO:0019902;GO:0019903;GO:0030234;GO:0030295;GO:0030695;GO:0035091;GO:0043167;GO:0043169;GO:0043539;GO:0046872;GO:0060589	GO:0005654;GO:0005737;GO:0005829;GO:0005874;GO:0005884;GO:0005886;GO:0005912;GO:0005924;GO:0005925;GO:0016020;GO:0016328;GO:0019897;GO:0019898;GO:0030054;GO:0030055;GO:0030424;GO:0030426;GO:0030427;GO:0030496;GO:0031234;GO:0031252;GO:0031982;GO:0031988;GO:0032991;GO:0042995;GO:0043005;GO:0043226;GO:0043227;GO:0043230;GO:0043234;GO:0044421;GO:0044422;GO:0044424;GO:0044425;GO:0044428;GO:0044430;GO:…	AQAHAENNEFITWNDIQACVDHVNLVVQEEHER	33	4;5	1	AQAHAENNEFITWNDIQAC[125.0477]VDHVNLVVQEEHER	AQAHAENNEFITWNDIQAC[130.0791]VDHVNLVVQEEHER	C	0.824955	NaN	-1.09541	NaN	-0.153027	0.615971	0.0209638	0.324457	NaN	NaN	NaN	-1.15672	0.992065	1.43182	-1.32998	NaN	-0.030752	NaN	0.294982	NaN	NaN	-0.143841	-0.520817	NaN	-0.519138	1.03702	-0.471243	0.313205	0.658444	0.254055	0.468717
+	+	0.0371485	2.29056	-0.318675	P26641	Elongation factor 1-gamma	EEF1G	266	GO:0006412;GO:0006414;GO:0008152;GO:0009058;GO:0009059;GO:0009607;GO:0009615;GO:0009987;GO:0010467;GO:0019538;GO:0034645;GO:0043170;GO:0044237;GO:0044238;GO:0044249;GO:0044260;GO:0044267;GO:0050896;GO:0051704;GO:0051707	GO:0003676;GO:0003723;GO:0003746;GO:0005488;GO:0008135	GO:0005634;GO:0005737;GO:0005829;GO:0016020;GO:0031982;GO:0031988;GO:0043226;GO:0043227;GO:0043229;GO:0043230;GO:0043231;GO:0044421;GO:0044424;GO:0044444;GO:0044464;GO:0065010;GO:0070062	AAAPAPEEEMDECEQALAAEPK	22	2	1	AAAPAPEEEMDEC[125.0477]EQALAAEPK	AAAPAPEEEMDEC[130.0791]EQALAAEPK	C	1.52969	NaN	1.70036	NaN	NaN	NaN	NaN	2.30687	1.9907	NaN	NaN	1.9516	1.84556	2.01399	2.62542	1.95159	NaN	2.3153	1.08893	NaN	NaN	NaN	NaN	2.35907	1.81146	2.0076	0.873287	1.75547	1.37645	1.56741	1.45891
+	+	0.0401905	2.23686	-0.320162	P01859	Immunoglobulin heavy constant gamma 2	IGHG2	27	GO:0002252;GO:0002253;GO:0002376;GO:0002682;GO:0002684;GO:0006950;GO:0006952;GO:0006955;GO:0006956;GO:0006958;GO:0006959;GO:0008152;GO:0019538;GO:0043170;GO:0044238;GO:0045087;GO:0048518;GO:0048583;GO:0048584;GO:0050776;GO:0050778;GO:0050789;GO:0050896;GO:0065007;GO:0072376	GO:0003823;GO:0005488	GO:0005576;GO:0005615;GO:0031982;GO:0031988;GO:0043226;GO:0043227;GO:0043230;GO:0044421;GO:0065010;GO:0070062;GO:0072562	STSESTAALGCLVK	14	1;2	1	STSESTAALGC[125.0477]LVK	STSESTAALGC[130.0791]LVK	C	-1.49241	-1.73979	-2.1494	-0.503414	-2.80673	NaN	-2.35291	-0.843895	-1.8273	-0.853915	-1.86183	-0.84994	-1.47424	-1.24044	-2.14863	-1.12325	-1.76673	-0.0385182	-2.36752	-2.49902	NaN	-0.937954	-1.25723	-1.11627	-2.06392	-0.474713	-1.59642	0.083905	-2.36627	-2.62228	-1.61012
+	+	0.0165946	2.74595	-0.322468	Q8NF37	Lysophosphatidylcholine acyltransferase 1	LPCAT1	330	GO:0001894;GO:0006082;GO:0006629;GO:0006638;GO:0006639;GO:0006641;GO:0006644;GO:0006650;GO:0006654;GO:0006662;GO:0008152;GO:0008610;GO:0008654;GO:0009058;GO:0009893;GO:0009894;GO:0009896;GO:0009987;GO:0010604;GO:0016053;GO:0018904;GO:0019222;GO:0019432;GO:0019637;GO:0019752;GO:0032502;GO:0042176;GO:0042180;GO:0042592;GO:0043129;GO:0043436;GO:0044237;GO:0044238;GO:0044249;GO:0044255;GO:0044281;GO:…	GO:0003824;GO:0005488;GO:0005509;GO:0008374;GO:0016407;GO:0016413;GO:0016740;GO:0016746;GO:0016747;GO:0043167;GO:0043169;GO:0046872;GO:0047159;GO:0047184;GO:0047191;GO:0047192	GO:0000139;GO:0005783;GO:0005789;GO:0005794;GO:0005811;GO:0016020;GO:0016021;GO:0031090;GO:0031224;GO:0043226;GO:0043227;GO:0043229;GO:0043231;GO:0044422;GO:0044424;GO:0044425;GO:0044431;GO:0044432;GO:0044444;GO:0044446;GO:0044464	LPADTCLLEFAR	12	2	1	LPADTC[125.0477]LLEFAR	LPADTC[130.0791]LLEFAR	C	-0.251887	NaN	0.825643	NaN	NaN	0.63484	NaN	NaN	NaN	NaN	NaN	NaN	0.782938	NaN	NaN	0.801827	0.284087	2.28418	0.851377	NaN	1.63297	0.668301	0.228933	0.986825	1.20323	NaN	-0.19376	1.10417	0.563871	NaN	0.538536
+	+	0.0140845	2.82055	-0.32254	P02652	Apolipoprotein A-II	APOA2	29	GO:0001523;GO:0001817;GO:0002526;GO:0002682;GO:0002697;GO:0002700;GO:0002718;GO:0002739;GO:0002740;GO:0006066;GO:0006457;GO:0006464;GO:0006576;GO:0006629;GO:0006638;GO:0006639;GO:0006641;GO:0006644;GO:0006650;GO:0006656;GO:0006662;GO:0006720;GO:0006721;GO:0006807;GO:0006810;GO:0006869;GO:0006950;GO:0006952;GO:0006954;GO:0007165;GO:0007602;GO:0007603;GO:0008152;GO:0008202;GO:0008203;GO:0008610;GO:…	GO:0004857;GO:0005102;GO:0005215;GO:0005319;GO:0005488;GO:0005496;GO:0005515;GO:0005543;GO:0008035;GO:0008047;GO:0008289;GO:0015248;GO:0015485;GO:0017127;GO:0022892;GO:0030234;GO:0031210;GO:0032934;GO:0034190;GO:0042802;GO:0042803;GO:0043167;GO:0043169;GO:0043176;GO:0043178;GO:0046982;GO:0046983;GO:0050997;GO:0055102;GO:0060228;GO:0070325;GO:0070653;GO:0071813;GO:0071814	GO:0005576;GO:0005768;GO:0005769;GO:0005788;GO:0005829;GO:0031974;GO:0031982;GO:0031988;GO:0032991;GO:0032994;GO:0034358;GO:0034361;GO:0034364;GO:0034366;GO:0034385;GO:0042627;GO:0043226;GO:0043227;GO:0043229;GO:0043230;GO:0043231;GO:0043233;GO:0044421;GO:0044422;GO:0044424;GO:0044432;GO:0044444;GO:0044446;GO:0044464;GO:0065010;GO:0070013;GO:0070062;GO:0072562	EPCVESLVSQYFQTVTDYGK	20	2;3	1	EPC[125.0477]VESLVSQYFQTVTDYGK	EPC[130.0791]VESLVSQYFQTVTDYGK	C	-2.08899	-2.79361	-2.8321	-1.57128	-2.87586	-2.04638	-2.80478	-1.40685	-2.57296	-2.02657	-2.56482	-0.489684	-2.36291	-1.08451	-2.58094	-2.10129	-2.06023	NaN	-2.70748	-2.54422	-2.28119	-1.55168	-2.96927	-1.89829	-2.28878	-0.227092	-1.62413	-0.660527	-3.11589	-2.86906	-2.25521
	+	0.138291	1.4528	-0.331883	P03952	Plasma kallikrein	KLKB1	57	GO:0002542;GO:0002673;GO:0006508;GO:0007596;GO:0007597;GO:0007599;GO:0008152;GO:0009987;GO:0010468;GO:0010954;GO:0016043;GO:0016485;GO:0019222;GO:0019538;GO:0022411;GO:0022617;GO:0030193;GO:0030195;GO:0030198;GO:0031347;GO:0031638;GO:0031639;GO:0032101;GO:0032501;GO:0042730;GO:0043062;GO:0043170;GO:0044238;GO:0048518;GO:0048519;GO:0048583;GO:0050727;GO:0050789;GO:0050817;GO:0050818;GO:0050819;GO:…	GO:0003824;GO:0004175;GO:0004252;GO:0008233;GO:0008236;GO:0016787;GO:0017171;GO:0070011	GO:0005576;GO:0005615;GO:0005886;GO:0016020;GO:0031982;GO:0031988;GO:0043226;GO:0043227;GO:0043230;GO:0044421;GO:0044464;GO:0065010;GO:0070062	CLLFSFLPASSINDMEK	17	2	1	C[125.0477]LLFSFLPASSINDMEK	C[130.0791]LLFSFLPASSINDMEK	C	-1.04722	-0.947924	-1.81138	NaN	-2.65521	-1.65851	-1.88273	-0.885944	-2.06151	NaN	-1.96061	NaN	NaN	NaN	-1.9781	NaN	-0.984164	NaN	-2.47477	-3.45095	-2.39699	NaN	-1.32809	-1.26675	-1.68808	NaN	-2.24829	0.163796	-2.88334	-3.09463	-1.59269
	+	0.154963	1.37753	-0.342228	P60660	Myosin light polypeptide 6	MYL6	147	GO:0003008;GO:0003012;GO:0006928;GO:0006935;GO:0006936;GO:0007165;GO:0007166;GO:0007167;GO:0007169;GO:0007264;GO:0007411;GO:0007519;GO:0008152;GO:0009605;GO:0009888;GO:0009987;GO:0014706;GO:0030029;GO:0030048;GO:0030049;GO:0032501;GO:0032502;GO:0033275;GO:0035556;GO:0040011;GO:0042221;GO:0042330;GO:0048013;GO:0048856;GO:0050789;GO:0050794;GO:0050896;GO:0051716;GO:0060537;GO:0065007;GO:0070252	GO:0003774;GO:0003824;GO:0005198;GO:0005488;GO:0005509;GO:0008307;GO:0016462;GO:0016787;GO:0016817;GO:0016818;GO:0016887;GO:0017111;GO:0030898;GO:0042623;GO:0043167;GO:0043169;GO:0046872	GO:0005829;GO:0005903;GO:0016020;GO:0016459;GO:0016461;GO:0031982;GO:0031988;GO:0032991;GO:0042995;GO:0043226;GO:0043227;GO:0043230;GO:0043234;GO:0044421;GO:0044422;GO:0044424;GO:0044430;GO:0044444;GO:0044446;GO:0044464;GO:0065010;GO:0070062	MTEEEVEM[15.9949]LVAGHEDSNGCINYEAFVR	27	3	1	MTEEEVEM[15.9949]LVAGHEDSNGC[125.0477]INYEAFVR	MTEEEVEM[15.9949]LVAGHEDSNGC[130.0791]INYEAFVR	C	NaN	NaN	-1.49343	-0.11022	NaN	-2.04139	-1.0027	-1.66435	NaN	-0.991031	-1.3387	-0.378359	NaN	-0.0938577	-2.01112	-1.46243	NaN	-0.294281	NaN	NaN	NaN	-1.68686	NaN	NaN	-1.20342	NaN	NaN	NaN	NaN	-1.23173	-1.63483
	+	0.0850615	1.77802	-0.342873	P00734	Prothrombin	F2	262	GO:0001558;GO:0001775;GO:0001932;GO:0001934;GO:0002376;GO:0002526;GO:0006464;GO:0006508;GO:0006873;GO:0006874;GO:0006875;GO:0006928;GO:0006950;GO:0006952;GO:0006953;GO:0006954;GO:0007165;GO:0007166;GO:0007275;GO:0007596;GO:0007597;GO:0007599;GO:0008152;GO:0008284;GO:0008360;GO:0009611;GO:0009889;GO:0009891;GO:0009892;GO:0009893;GO:0009966;GO:0009967;GO:0009987;GO:0010468;GO:0010522;GO:0010524;GO:…	GO:0003824;GO:0004175;GO:0004252;GO:0004871;GO:0004872;GO:0005102;GO:0005488;GO:0005509;GO:0005515;GO:0008083;GO:0008233;GO:0008236;GO:0016787;GO:0017171;GO:0038023;GO:0043167;GO:0043169;GO:0046872;GO:0060089;GO:0070011;GO:0070053	GO:0005576;GO:0005615;GO:0005788;GO:0005796;GO:0005886;GO:0016020;GO:0031974;GO:0031982;GO:0031988;GO:0043226;GO:0043227;GO:0043230;GO:0043233;GO:0044421;GO:0044422;GO:0044424;GO:0044431;GO:0044432;GO:0044444;GO:0044446;GO:0044464;GO:0065010;GO:0070013;GO:0070062;GO:0072562	HQDFNSAVQLVENFCR	16	2;3	1	HQDFNSAVQLVENFC[125.0477]R	HQDFNSAVQLVENFC[130.0791]R	C	-4.28287	-3.68894	-4.16775	-3.58575	-5.08246	-4.28679	-4.57313	-2.84457	-3.66656	-4.13825	NaN	NaN	-1.37979	-2.66223	-3.71155	-3.38298	-3.57005	NaN	-4.81139	-4.01737	NaN	-3.97734	-3.64298	-2.42485	-4.75851	NaN	-4.70292	-1.71242	-4.33439	-4.47685	-3.02145
	+	0.0861725	1.76724	-0.343595	P21810	Biglycan	BGN	321	GO:0000271;GO:0000272;GO:0001974;GO:0005975;GO:0005976;GO:0006022;GO:0006023;GO:0006024;GO:0006026;GO:0006027;GO:0006464;GO:0006790;GO:0006807;GO:0008152;GO:0009056;GO:0009057;GO:0009058;GO:0009059;GO:0009308;GO:0009987;GO:0016043;GO:0016051;GO:0016052;GO:0018149;GO:0018193;GO:0018209;GO:0019538;GO:0019800;GO:0030198;GO:0030203;GO:0030204;GO:0030205;GO:0030206;GO:0030207;GO:0030208;GO:0032501;GO:…	GO:0001871;GO:0005198;GO:0005201;GO:0005488;GO:0005539;GO:0030246;GO:0030247;GO:0050840	GO:0005576;GO:0005578;GO:0005775;GO:0005796;GO:0005886;GO:0009986;GO:0016020;GO:0016023;GO:0030133;GO:0031012;GO:0031410;GO:0031974;GO:0031982;GO:0031988;GO:0042383;GO:0043202;GO:0043226;GO:0043227;GO:0043229;GO:0043230;GO:0043231;GO:0043233;GO:0044421;GO:0044422;GO:0044424;GO:0044431;GO:0044437;GO:0044444;GO:0044446;GO:0044464;GO:0065010;GO:0070013;GO:0070062	VGVNDFCPMGFGVK	14	2	1	VGVNDFC[125.0477]PMGFGVK	VGVNDFC[130.0791]PMGFGVK	C	-2.9993	-2.74571	-3.93385	-2.7427	-2.63144	-2.06534	-3.54719	NaN	-2.80638	-3.11807	-3.1646	NaN	-4.28542	-3.37834	-2.72412	-2.84685	-3.2342	-0.925182	-3.96265	NaN	-4.59083	-2.4681	-3.53888	-2.74694	-3.52606	-3.18233	-4.09356	-2.47885	-3.73237	-4.2498	-3.12783
	+	0.0638662	1.95234	-0.346483	O43237	Cytoplasmic dynein 1 light intermediate chain 2	DYNC1LI2	104	GO:0000226;GO:0002376;GO:0002478;GO:0002495;GO:0002504;GO:0006810;GO:0006928;GO:0006996;GO:0007010;GO:0007017;GO:0007018;GO:0009987;GO:0016043;GO:0019882;GO:0019884;GO:0019886;GO:0048002;GO:0051179;GO:0051234;GO:0051640;GO:0051641;GO:0051642;GO:0071840;GO:0071841;GO:0071842	GO:0000166;GO:0003774;GO:0003777;GO:0003824;GO:0005488;GO:0005524;GO:0016462;GO:0016787;GO:0016817;GO:0016818;GO:0017076;GO:0017111;GO:0030554;GO:0032553;GO:0032555;GO:0032559;GO:0035639	GO:0005813;GO:0005815;GO:0005829;GO:0005868;GO:0005874;GO:0005875;GO:0016020;GO:0030286;GO:0032991;GO:0043226;GO:0043228;GO:0043229;GO:0043232;GO:0043234;GO:0044422;GO:0044424;GO:0044430;GO:0044444;GO:0044446;GO:0044464	CNVWILDGDLYHK	13	2	1	C[125.0477]NVWILDGDLYHK	C[130.0791]NVWILDGDLYHK	C	1.18277	NaN	1.30404	1.01242	-0.320262	NaN	0.24188	1.04172	NaN	0.658521	0.594946	-0.125827	1.23818	0.686659	0.390348	NaN	0.752555	1.73169	0.491365	NaN	NaN	0.471938	0.597803	0.61275	0.763653	1.16391	NaN	0.0939481	1.37442	NaN	0.917083
	+	0.144401	1.42413	-0.350897	P28838	Cytosol aminopeptidase	LAP3	462	GO:0006508;GO:0008152;GO:0019538;GO:0043170;GO:0044238	GO:0003824;GO:0004177;GO:0005488;GO:0008233;GO:0008235;GO:0008237;GO:0008238;GO:0016787;GO:0030145;GO:0043167;GO:0043169;GO:0046872;GO:0046914;GO:0070011	GO:0005634;GO:0005654;GO:0005737;GO:0005739;GO:0005802;GO:0005912;GO:0005924;GO:0005925;GO:0030054;GO:0030055;GO:0031982;GO:0031988;GO:0043226;GO:0043227;GO:0043229;GO:0043230;GO:0043231;GO:0044421;GO:0044422;GO:0044424;GO:0044428;GO:0044431;GO:0044444;GO:0044446;GO:0044464;GO:0065010;GO:0070062;GO:0070161	SAGACTAAAFLK	12	2	1	SAGAC[125.0477]TAAAFLK	SAGAC[130.0791]TAAAFLK	C	-0.923799	NaN	-1.16304	NaN	-1.9251	-0.812931	NaN	-0.653557	NaN	-2.3743	NaN	-1.02661	0.141439	-0.410022	NaN	-0.645792	NaN	-1.00407	-2.03601	NaN	NaN	-1.05529	NaN	-0.972549	NaN	NaN	NaN	-1.84863	NaN	NaN	NaN
	+	0.0787105	1.81725	-0.353201	P02787	Serotransferrin	TF	656	GO:0000041;GO:0001775;GO:0001894;GO:0001895;GO:0002576;GO:0006810;GO:0006811;GO:0006812;GO:0006826;GO:0006873;GO:0006875;GO:0006879;GO:0006887;GO:0007596;GO:0007599;GO:0009987;GO:0015031;GO:0015682;GO:0016192;GO:0019725;GO:0030001;GO:0030003;GO:0030168;GO:0032501;GO:0032940;GO:0033572;GO:0042592;GO:0045184;GO:0046903;GO:0048878;GO:0050801;GO:0050817;GO:0050878;GO:0051234;GO:0051649;GO:0055065;GO:…	GO:0005215;GO:0005381;GO:0005488;GO:0005506;GO:0008199;GO:0008324;GO:0015075;GO:0015091;GO:0022857;GO:0022890;GO:0022891;GO:0022892;GO:0043167;GO:0043169;GO:0046872;GO:0046873;GO:0046914;GO:0046915;GO:0072510	GO:0005576;GO:0005615;GO:0005768;GO:0005769;GO:0005770;GO:0005905;GO:0009925;GO:0009986;GO:0010008;GO:0016020;GO:0016023;GO:0016324;GO:0030139;GO:0031090;GO:0031410;GO:0031974;GO:0031982;GO:0031983;GO:0031988;GO:0034774;GO:0043226;GO:0043227;GO:0043229;GO:0043230;GO:0043231;GO:0043233;GO:0044421;GO:0044422;GO:0044424;GO:0044425;GO:0044433;GO:0044440;GO:0044444;GO:0044446;GO:0044459;GO:0044464;GO:…	DLLFRDDTVCLAK	13	2;3	1	DLLFRDDTVC[125.0477]LAK	DLLFRDDTVC[130.0791]LAK	C	-3.20149	-3.05647	-2.91043	-2.82293	-3.5587	-2.05277	-3.20386	-1.60987	-2.41774	-3.01001	-3.22818	-0.938717	-2.35125	-2.96661	-2.44111	-1.08991	-2.87719	NaN	-2.91639	-3.5307	-2.75146	-1.57841	-4.0534	-2.13156	-3.5612	-2.04547	-3.07802	-1.40868	-3.56065	-3.66353	-3.03905
	+	0.128637	1.50547	-0.354158	P01023	Alpha-2-macroglobulin	A2M	563	GO:0001775;GO:0001868;GO:0001869;GO:0002576;GO:0002673;GO:0002682;GO:0002683;GO:0002697;GO:0002698;GO:0002920;GO:0002921;GO:0006810;GO:0006887;GO:0007165;GO:0007264;GO:0007596;GO:0007597;GO:0007599;GO:0008152;GO:0009892;GO:0009966;GO:0009987;GO:0010466;GO:0010468;GO:0010605;GO:0010951;GO:0010955;GO:0016043;GO:0016192;GO:0019222;GO:0019538;GO:0022411;GO:0022617;GO:0023051;GO:0030154;GO:0030168;GO:…	GO:0002020;GO:0004857;GO:0004866;GO:0004867;GO:0005102;GO:0005488;GO:0005515;GO:0019838;GO:0019899;GO:0019955;GO:0019956;GO:0019958;GO:0019959;GO:0019966;GO:0030234;GO:0030414;GO:0043120;GO:0048306;GO:0061134;GO:0061135	GO:0005576;GO:0005829;GO:0031093;GO:0031974;GO:0031982;GO:0031983;GO:0031988;GO:0034774;GO:0043226;GO:0043227;GO:0043230;GO:0043233;GO:0044421;GO:0044422;GO:0044424;GO:0044433;GO:0044444;GO:0044446;GO:0044464;GO:0060205;GO:0065010;GO:0070062;GO:0072562	LLIYAVLPTGDVIGDSAKYDVENCLANK	28	3;4	1	LLIYAVLPTGDVIGDSAKYDVENC[125.0477]LANK	LLIYAVLPTGDVIGDSAKYDVENC[130.0791]LANK	C	-2.48809	-2.6413	-4.28026	NaN	-3.04327	-1.45108	-2.59317	-2.51453	-2.15948	NaN	-2.60324	NaN	-4.78671	-1.78526	-2.71824	-2.22949	-4.68324	NaN	-3.44288	-2.76464	-1.84731	-1.85544	-3.02887	-3.24952	-2.7255	NaN	-5.05772	-3.04498	-3.47617	NaN	-3.36779
	+	0.176082	1.30171	-0.357375	Q02218	2-oxoglutarate dehydrogenase complex component E1	OGDH	802	GO:0005975;GO:0005996;GO:0006006;GO:0006007;GO:0006066;GO:0006082;GO:0006084;GO:0006091;GO:0006096;GO:0006099;GO:0006103;GO:0006104;GO:0006139;GO:0006520;GO:0006553;GO:0006554;GO:0006732;GO:0006733;GO:0006734;GO:0006753;GO:0006807;GO:0006928;GO:0008152;GO:0009056;GO:0009063;GO:0009066;GO:0009068;GO:0009109;GO:0009117;GO:0009308;GO:0009310;GO:0009987;GO:0016052;GO:0016054;GO:0016477;GO:0019318;GO:…	GO:0003824;GO:0004591;GO:0005488;GO:0016491;GO:0016620;GO:0016624;GO:0016903;GO:0019842;GO:0030976;GO:0034602;GO:0043167;GO:0043169;GO:0046872;GO:0048037;GO:0050662	GO:0005739;GO:0005759;GO:0016020;GO:0031090;GO:0031966;GO:0031974;GO:0032991;GO:0043226;GO:0043227;GO:0043229;GO:0043231;GO:0043233;GO:0043234;GO:0044422;GO:0044424;GO:0044429;GO:0044444;GO:0044446;GO:0044464;GO:0045252;GO:0070013	FLQMCNDDPDVLPDLK	16	2	1	FLQMC[125.0477]NDDPDVLPDLK	FLQMC[130.0791]NDDPDVLPDLK	C	-1.43082	NaN	0.386903	NaN	NaN	NaN	0.424664	NaN	0.104304	NaN	0.704897	NaN	0.465397	0.731411	0.449354	0.415108	0.276716	0.482714	-3.52211	NaN	NaN	NaN	0.329306	0.395878	0.538318	0.922079	0.29192	0.114706	0.460648	-0.0812976	-0.00633874
+	+	0.0382115	2.26315	-0.359197	P07858	Cathepsin B	CTSB	211	GO:0002218;GO:0002221;GO:0002224;GO:0002253;GO:0002376;GO:0002682;GO:0002684;GO:0002757;GO:0002758;GO:0002764;GO:0003006;GO:0006508;GO:0006950;GO:0006952;GO:0006955;GO:0007165;GO:0008152;GO:0009719;GO:0009725;GO:0009888;GO:0009987;GO:0010033;GO:0010941;GO:0016043;GO:0019222;GO:0019538;GO:0022411;GO:0022414;GO:0022617;GO:0030154;GO:0030198;GO:0030574;GO:0030855;GO:0031347;GO:0031349;GO:0032501;GO:…	GO:0001948;GO:0003824;GO:0004175;GO:0004197;GO:0005488;GO:0005515;GO:0005518;GO:0008233;GO:0008234;GO:0016787;GO:0043394;GO:0070011	GO:0000323;GO:0005576;GO:0005615;GO:0005622;GO:0005730;GO:0005739;GO:0005764;GO:0005773;GO:0016023;GO:0031410;GO:0031982;GO:0031988;GO:0042470;GO:0043226;GO:0043227;GO:0043228;GO:0043229;GO:0043230;GO:0043231;GO:0043232;GO:0044421;GO:0044422;GO:0044424;GO:0044428;GO:0044444;GO:0044446;GO:0044464;GO:0048471;GO:0048770;GO:0065010;GO:0070062	ICEPGYSPTYK	11	2	1	IC[125.0477]EPGYSPTYK	IC[130.0791]EPGYSPTYK	C	-3.47128	-2.55988	-3.98124	-3.3597	-4.2233	-1.85833	-3.94144	-3.6308	-3.21684	-2.94023	-3.74434	-2.31845	-2.65759	-3.32733	NaN	-2.56439	-2.59508	-0.799577	-4.58118	-2.27485	NaN	-2.84471	-3.18575	-2.42513	NaN	-2.87453	-4.26366	-1.57768	-3.17059	-3.91138	-2.68266
	+	0.171557	1.31938	-0.360821	Q8WU39	Marginal zone B- and B1-cell-specific protein	MZB1	143	GO:0002637;GO:0002640;GO:0002642;GO:0002682;GO:0002694;GO:0002697;GO:0002700;GO:0006461;GO:0006915;GO:0008219;GO:0008284;GO:0009889;GO:0009891;GO:0009893;GO:0009987;GO:0010556;GO:0010557;GO:0010604;GO:0012501;GO:0016043;GO:0016265;GO:0019222;GO:0022607;GO:0030888;GO:0032944;GO:0033622;GO:0042127;GO:0043933;GO:0048518;GO:0048522;GO:0050670;GO:0050789;GO:0050794;GO:0050864;GO:0050865;GO:0051249;GO:…		GO:0005576;GO:0005737;GO:0005788;GO:0031974;GO:0032991;GO:0034663;GO:0043233;GO:0043234;GO:0044422;GO:0044424;GO:0044432;GO:0044444;GO:0044446;GO:0044464;GO:0070013	TCLHYLGEFGEDQIYEAHQQGR	22	3;4	1	TC[125.0477]LHYLGEFGEDQIYEAHQQGR	TC[130.0791]LHYLGEFGEDQIYEAHQQGR	C	NaN	NaN	-3.60204	-1.83654	-3.60009	-2.00902	-3.44595	-3.90407	NaN	-2.74801	-2.96663	-1.58094	-2.4881	-2.1331	NaN	-4.31733	-2.84845	-1.50504	NaN	NaN	NaN	-1.71177	NaN	-4.04662	NaN	-2.54723	NaN	-1.3623	NaN	-3.32594	NaN
+	+	0.0131852	2.86578	-0.362977	P00450	Ceruloplasmin	CP	534	GO:0000041;GO:0006810;GO:0006811;GO:0006812;GO:0006825;GO:0006873;GO:0006875;GO:0006879;GO:0009987;GO:0019725;GO:0030001;GO:0030003;GO:0042592;GO:0048878;GO:0050801;GO:0051234;GO:0055065;GO:0055072;GO:0055080;GO:0055082;GO:0055085;GO:0065007;GO:0065008	GO:0003824;GO:0004322;GO:0005488;GO:0005507;GO:0005515;GO:0016491;GO:0016722;GO:0016724;GO:0043167;GO:0043169;GO:0046872;GO:0046914;GO:0051087	GO:0005576;GO:0005615;GO:0005765;GO:0005774;GO:0016020;GO:0031090;GO:0031982;GO:0031988;GO:0043226;GO:0043227;GO:0043230;GO:0044421;GO:0044422;GO:0044424;GO:0044437;GO:0044444;GO:0044446;GO:0044464;GO:0065010;GO:0070062;GO:0072562	EVGPTNADPVCLAK	14	2	1	EVGPTNADPVC[125.0477]LAK	EVGPTNADPVC[130.0791]LAK	C	-2.38925	-3.69286	-2.99119	NaN	-3.27062	-2.64881	-3.09383	-2.34733	-3.13234	-2.30118	-3.13512	-1.67275	NaN	NaN	-2.61153	NaN	-2.36417	NaN	-2.98351	-2.549	NaN	NaN	-2.65751	-2.30162	NaN	NaN	-3.30935	-1.0237	-3.09331	-2.63111	-2.51632
	+	0.06544	1.93335	-0.365459	P12111	Collagen alpha-3(VI) chain	COL6A3	2439	GO:0006935;GO:0007155;GO:0007411;GO:0007517;GO:0008152;GO:0009605;GO:0009987;GO:0016043;GO:0022411;GO:0022610;GO:0022617;GO:0030198;GO:0030574;GO:0032501;GO:0032502;GO:0032963;GO:0040011;GO:0042221;GO:0042330;GO:0043062;GO:0043170;GO:0044236;GO:0044243;GO:0044259;GO:0048513;GO:0048856;GO:0050896;GO:0061061;GO:0071840;GO:0071841;GO:0071842;GO:0071845	GO:0004857;GO:0004866;GO:0004867;GO:0030234;GO:0030414;GO:0061134;GO:0061135	GO:0005576;GO:0005578;GO:0005581;GO:0005589;GO:0005615;GO:0005788;GO:0005886;GO:0016020;GO:0030934;GO:0031012;GO:0031974;GO:0031982;GO:0031988;GO:0042383;GO:0043226;GO:0043227;GO:0043230;GO:0043233;GO:0044420;GO:0044421;GO:0044422;GO:0044424;GO:0044432;GO:0044444;GO:0044446;GO:0044464;GO:0065010;GO:0070013;GO:0070062	DVVLSIVNDLTIAESNCPR	19	2;3	1	DVVLSIVNDLTIAESNC[125.0477]PR	DVVLSIVNDLTIAESNC[130.0791]PR	C	-4.14067	NaN	-3.94519	NaN	-4.24767	-2.91605	-4.17726	NaN	-3.75001	NaN	-4.4668	NaN	-2.85987	-2.46132	-3.29415	-2.87737	-2.3709	NaN	-3.62309	NaN	NaN	NaN	-2.33341	-3.02024	-3.88618	NaN	-4.92287	-1.75313	-4.19092	-4.50118	-3.08834
	+	0.110871	1.59319	-0.376207	P07951	Tropomyosin beta chain	TPM2	36	GO:0003008;GO:0003012;GO:0006140;GO:0006928;GO:0006936;GO:0009894;GO:0009987;GO:0019219;GO:0019222;GO:0030029;GO:0030048;GO:0030049;GO:0030811;GO:0031323;GO:0031329;GO:0032501;GO:0033121;GO:0033275;GO:0043462;GO:0050789;GO:0050790;GO:0050794;GO:0051171;GO:0051336;GO:0065007;GO:0065009;GO:0070252;GO:0080090	GO:0003779;GO:0005198;GO:0005488;GO:0005515;GO:0008092;GO:0008307	GO:0005829;GO:0005862;GO:0044422;GO:0044424;GO:0044430;GO:0044444;GO:0044446;GO:0044449;GO:0044464	CKQLEEEQQALQK	13	2	1	C[125.0477]KQLEEEQQALQK	C[130.0791]KQLEEEQQALQK	C	1.87482	-0.937	2.32765	1.35438	1.76366	1.80999	2.01477	1.70963	1.55626	1.97554	1.43052	2.65062	NaN	2.53952	1.29593	1.28365	1.49476	3.46578	1.01743	-2.45642	2.32512	1.19648	1.54134	1.41189	1.35756	3.46614	1.9069	1.00678	1.9258	0.856054	0.781121
+	+	0.00355556	3.55837	-0.377055	Q86VP6	Cullin-associated NEDD8-dissociated protein 1	CAND1	92	GO:0006355;GO:0006357;GO:0006461;GO:0006464;GO:0008152;GO:0009889;GO:0009891;GO:0009893;GO:0009987;GO:0010265;GO:0010468;GO:0010556;GO:0010557;GO:0010604;GO:0010628;GO:0016043;GO:0016567;GO:0019219;GO:0019222;GO:0019538;GO:0022607;GO:0030154;GO:0031323;GO:0031325;GO:0031326;GO:0031328;GO:0032446;GO:0032502;GO:0034621;GO:0034622;GO:0043086;GO:0043170;GO:0043254;GO:0043412;GO:0043623;GO:0043933;GO:…		GO:0000151;GO:0005634;GO:0005654;GO:0005737;GO:0016020;GO:0031461;GO:0031982;GO:0031988;GO:0032991;GO:0043226;GO:0043227;GO:0043229;GO:0043230;GO:0043231;GO:0043234;GO:0044421;GO:0044422;GO:0044424;GO:0044428;GO:0044446;GO:0044464;GO:0065010;GO:0070062	EYQVETIVDTLCTNMLSDKEQLR	23	3	1	EYQVETIVDTLC[125.0477]TNMLSDKEQLR	EYQVETIVDTLC[130.0791]TNMLSDKEQLR	C	NaN	NaN	0.081842	NaN	-0.318921	NaN	NaN	NaN	NaN	0.111563	NaN	0.126775	NaN	0.179612	-0.54314	-0.847855	-0.173132	0.253625	-0.165887	-1.23611	NaN	NaN	NaN	-0.0416276	-0.323548	0.296585	NaN	-0.885218	NaN	-0.880547	-1.14248
+	+	0.0446867	2.15153	-0.377318	P02788	Lactotransferrin	LTF	608	GO:0001503;GO:0001817;GO:0001818;GO:0001894;GO:0001895;GO:0001932;GO:0002227;GO:0002251;GO:0002376;GO:0002385;GO:0002682;GO:0002684;GO:0002831;GO:0002832;GO:0006139;GO:0006140;GO:0006351;GO:0006355;GO:0006807;GO:0006810;GO:0006811;GO:0006873;GO:0006875;GO:0006879;GO:0006950;GO:0006952;GO:0006955;GO:0006959;GO:0006996;GO:0008152;GO:0008284;GO:0009058;GO:0009059;GO:0009607;GO:0009617;GO:0009620;GO:…	GO:0001871;GO:0003676;GO:0003677;GO:0003824;GO:0004175;GO:0004252;GO:0005488;GO:0005506;GO:0005539;GO:0008047;GO:0008201;GO:0008233;GO:0008236;GO:0016787;GO:0017171;GO:0019207;GO:0019209;GO:0019887;GO:0030234;GO:0030246;GO:0030247;GO:0030295;GO:0043167;GO:0043169;GO:0043539;GO:0046872;GO:0046914;GO:0070011	GO:0005576;GO:0005615;GO:0005634;GO:0005737;GO:0016023;GO:0030141;GO:0031410;GO:0031974;GO:0031982;GO:0031983;GO:0031988;GO:0042581;GO:0043226;GO:0043227;GO:0043229;GO:0043230;GO:0043231;GO:0043233;GO:0044421;GO:0044422;GO:0044424;GO:0044433;GO:0044444;GO:0044446;GO:0044464;GO:0060205;GO:0065010;GO:0070062;GO:0071682;GO:0097013	SCHLAMAPNHAVVSR	15	2;3	1	SC[125.0477]HLAMAPNHAVVSR	SC[130.0791]HLAMAPNHAVVSR	C	-4.49092	-4.12049	-3.69423	NaN	NaN	NaN	NaN	-2.21476	NaN	NaN	-3.1748	-1.88173	-2.30376	-1.67641	-3.0878	-2.22103	-2.21908	-1.55085	-3.37875	NaN	-3.13105	NaN	-3.16616	-2.15014	-3.92486	NaN	-3.67151	-1.8229	-3.82514	NaN	-2.60851
+	+	0.0402264	2.23194	-0.381371	P29692	Elongation factor 1-delta	EEF1D	217	GO:0006139;GO:0006351;GO:0006355;GO:0006412;GO:0006414;GO:0006807;GO:0007165;GO:0008152;GO:0009058;GO:0009059;GO:0009299;GO:0009314;GO:0009628;GO:0009889;GO:0009966;GO:0009967;GO:0009987;GO:0010212;GO:0010467;GO:0010468;GO:0010556;GO:0010627;GO:0010646;GO:0010647;GO:0010740;GO:0010941;GO:0016070;GO:0019219;GO:0019222;GO:0019538;GO:0023051;GO:0023056;GO:0031323;GO:0031326;GO:0032774;GO:0034641;GO:…	GO:0003676;GO:0003677;GO:0003723;GO:0003746;GO:0004871;GO:0005488;GO:0005515;GO:0008134;GO:0008135;GO:0031072;GO:0033613;GO:0060089	GO:0005634;GO:0005730;GO:0005737;GO:0005829;GO:0005853;GO:0032991;GO:0043226;GO:0043227;GO:0043228;GO:0043229;GO:0043231;GO:0043232;GO:0043234;GO:0044422;GO:0044424;GO:0044428;GO:0044444;GO:0044446;GO:0044464	SSILLDVKPWDDETDMAQLEACVR	24	3	1	SSILLDVKPWDDETDMAQLEAC[125.0477]VR	SSILLDVKPWDDETDMAQLEAC[130.0791]VR	C	NaN	NaN	NaN	1.52547	NaN	NaN	NaN	-0.101197	NaN	0.30629	NaN	0.732648	0.934353	0.883521	NaN	0.712366	0.338035	1.20093	NaN	NaN	NaN	0.0328028	NaN	0.850367	0.848045	1.33762	0.160557	NaN	0.637105	0.721797	NaN
+	+	0	6.5196	-0.381788	Q9ULA0	Aspartyl aminopeptidase	DNPEP	457	GO:0006518;GO:0008152;GO:0009987;GO:0044237	GO:0003824;GO:0004177;GO:0005488;GO:0008233;GO:0008237;GO:0008238;GO:0008270;GO:0016787;GO:0043167;GO:0043169;GO:0046872;GO:0046914;GO:0070011	GO:0005634;GO:0005654;GO:0005737;GO:0043226;GO:0043227;GO:0043229;GO:0043231;GO:0044421;GO:0044422;GO:0044424;GO:0044428;GO:0044446;GO:0044464;GO:0072562	EMACTTGVLQTLTLFK	16	2	1	EMAC[125.0477]TTGVLQTLTLFK	EMAC[130.0791]TTGVLQTLTLFK	C	-0.983423	NaN	-0.715423	NaN	-0.949539	-0.826929	-0.671857	-0.702304	-2.04053	NaN	-0.423336	-0.980937	-0.786234	-0.25186	-0.439527	-0.00548341	-0.148208	-0.0429213	-0.692927	NaN	NaN	NaN	-0.270062	-0.669224	-0.617025	0.424115	-0.490433	-0.0152565	-0.892569	NaN	-0.426986
	+	0.13301	1.4812	-0.382102	P98160	Basement membrane-specific heparan sulfate proteoglycan core protein	HSPG2	1933	GO:0000271;GO:0000272;GO:0001503;GO:0001523;GO:0001525;GO:0001958;GO:0002062;GO:0005975;GO:0005976;GO:0006022;GO:0006023;GO:0006024;GO:0006026;GO:0006027;GO:0006629;GO:0006720;GO:0006721;GO:0006790;GO:0006807;GO:0007165;GO:0007420;GO:0007602;GO:0007603;GO:0008104;GO:0008152;GO:0009056;GO:0009057;GO:0009058;GO:0009059;GO:0009308;GO:0009314;GO:0009416;GO:0009581;GO:0009582;GO:0009583;GO:0009584;GO:…	GO:0005488;GO:0005515;GO:0008022;GO:0043167;GO:0043169;GO:0046872	GO:0005576;GO:0005605;GO:0005615;GO:0005775;GO:0005796;GO:0005886;GO:0005912;GO:0005924;GO:0005925;GO:0016020;GO:0030054;GO:0030055;GO:0031012;GO:0031974;GO:0031982;GO:0031988;GO:0043202;GO:0043226;GO:0043227;GO:0043230;GO:0043233;GO:0044420;GO:0044421;GO:0044422;GO:0044424;GO:0044431;GO:0044437;GO:0044444;GO:0044446;GO:0044464;GO:0065010;GO:0070013;GO:0070062;GO:0070161	LPAVEPTDQAQYLCR	15	2	1	LPAVEPTDQAQYLC[125.0477]R	LPAVEPTDQAQYLC[130.0791]R	C	NaN	NaN	NaN	NaN	NaN	NaN	NaN	NaN	NaN	NaN	-2.26878	NaN	NaN	-1.70424	-3.28681	-3.54586	-2.85618	NaN	-3.38431	NaN	NaN	NaN	-4.15015	NaN	-4.07588	-2.69604	NaN	-1.03276	-3.46165	NaN	-3.13764
	+	0.162493	1.35203	-0.383522	Q96C19	EF-hand domain-containing protein D2	EFHD2	172		GO:0005488;GO:0005509;GO:0043167;GO:0043169;GO:0046872	GO:0044425;GO:0044464;GO:0045121	AAAGELQEDSGLCVLAR	17	2	1	AAAGELQEDSGLC[125.0477]VLAR	AAAGELQEDSGLC[130.0791]VLAR	C	-0.825096	NaN	-0.107401	-1.82281	NaN	-0.114968	NaN	-1.08054	-0.973888	-0.473774	-0.325711	1.01363	2.10233	0.0298862	0.175125	2.67204	1.6002	1.85905	-0.256971	NaN	NaN	0.0741152	-0.402738	0.676751	1.92799	0.50664	NaN	-0.284596	NaN	0.0331531	0.158647
+	+	0.0491918	2.09269	-0.383799	P79483	HLA class II histocompatibility antigen, DR beta 3 chain	HLA-DRB3	146	GO:0002253;GO:0002376;GO:0002429;GO:0002478;GO:0002495;GO:0002504;GO:0002682;GO:0002684;GO:0002694;GO:0002696;GO:0002757;GO:0002764;GO:0002768;GO:0007165;GO:0007166;GO:0009987;GO:0010033;GO:0019221;GO:0019882;GO:0019884;GO:0019886;GO:0031294;GO:0031295;GO:0034097;GO:0034341;GO:0042221;GO:0048002;GO:0048518;GO:0048522;GO:0048583;GO:0048584;GO:0050776;GO:0050778;GO:0050789;GO:0050794;GO:0050851;GO:…	GO:0003823;GO:0004871;GO:0004872;GO:0004888;GO:0005488;GO:0032395;GO:0038023;GO:0042277;GO:0042605;GO:0060089	GO:0000139;GO:0005765;GO:0005774;GO:0005886;GO:0005887;GO:0010008;GO:0012506;GO:0012507;GO:0016020;GO:0016021;GO:0030176;GO:0030658;GO:0030659;GO:0030662;GO:0030665;GO:0030666;GO:0030669;GO:0031090;GO:0031224;GO:0031226;GO:0031227;GO:0031300;GO:0031301;GO:0031902;GO:0032588;GO:0032991;GO:0042611;GO:0042613;GO:0043234;GO:0044422;GO:0044424;GO:0044425;GO:0044431;GO:0044432;GO:0044433;GO:0044437;GO:…	TQPLQHHNLLVCSVSGFYPGSIEVR	25	3;4	1	TQPLQHHNLLVC[125.0477]SVSGFYPGSIEVR	TQPLQHHNLLVC[130.0791]SVSGFYPGSIEVR	C	-3.4183	-4.77862	-2.71238	-2.392	-2.79549	-2.36805	-4.67246	-1.99843	-4.1308	-2.56387	-3.26638	-1.54772	-3.09746	-2.15954	-2.68058	-2.22811	-2.37476	-1.47027	-3.56313	NaN	NaN	-3.04691	-4.21726	-3.11646	-3.5485	-1.55804	-4.76941	NaN	-4.72556	-4.12984	-2.74965
+	+	0.00577778	3.31455	-0.386132	P35579	Myosin-9	MYH9	896	GO:0000212;GO:0000226;GO:0000768;GO:0000910;GO:0001525;GO:0001701;GO:0001767;GO:0001768;GO:0002376;GO:0002521;GO:0002573;GO:0006508;GO:0006509;GO:0006810;GO:0006911;GO:0006928;GO:0006935;GO:0006949;GO:0006996;GO:0007010;GO:0007017;GO:0007051;GO:0007155;GO:0007163;GO:0007165;GO:0007166;GO:0007167;GO:0007169;GO:0007229;GO:0007264;GO:0007411;GO:0007520;GO:0008152;GO:0008277;GO:0008360;GO:0009605;GO:…	GO:0000146;GO:0000166;GO:0003774;GO:0003779;GO:0003824;GO:0005488;GO:0005515;GO:0005524;GO:0008092;GO:0016462;GO:0016787;GO:0016817;GO:0016818;GO:0016887;GO:0017076;GO:0017111;GO:0019904;GO:0030554;GO:0030898;GO:0032553;GO:0032555;GO:0032559;GO:0035639;GO:0042623;GO:0042802;GO:0042803;GO:0043495;GO:0043531;GO:0046983;GO:0051015	GO:0001725;GO:0001726;GO:0001772;GO:0001931;GO:0005634;GO:0005737;GO:0005819;GO:0005826;GO:0005829;GO:0005856;GO:0005886;GO:0005911;GO:0005912;GO:0005913;GO:0015629;GO:0016020;GO:0016459;GO:0016460;GO:0030054;GO:0031252;GO:0031594;GO:0031982;GO:0031988;GO:0032154;GO:0032155;GO:0032432;GO:0032991;GO:0042641;GO:0042995;GO:0043226;GO:0043227;GO:0043228;GO:0043229;GO:0043230;GO:0043231;GO:0043232;GO:…	LQLQEQLQAETELCAEAEELR	21	3	1	LQLQEQLQAETELC[125.0477]AEAEELR	LQLQEQLQAETELC[130.0791]AEAEELR	C	NaN	NaN	NaN	NaN	NaN	NaN	NaN	NaN	NaN	NaN	0.54819	1.11126	NaN	1.27582	NaN	1.17747	0.966621	1.21984	0.793474	NaN	NaN	NaN	0.841267	NaN	1.17098	NaN	NaN	0.861155	NaN	0.744195	0.918721
+	+	0.00782456	3.12892	-0.386972	Q16401	26S proteasome non-ATPase regulatory subunit 5	PSMD5	290	GO:0000082;GO:0000209;GO:0000278;GO:0002218;GO:0002220;GO:0002223;GO:0002253;GO:0002376;GO:0002429;GO:0002474;GO:0002478;GO:0002479;GO:0002682;GO:0002684;GO:0002757;GO:0002758;GO:0002764;GO:0002768;GO:0006461;GO:0006464;GO:0006508;GO:0006511;GO:0006521;GO:0006807;GO:0006915;GO:0006950;GO:0006952;GO:0006955;GO:0006974;GO:0006977;GO:0007049;GO:0007165;GO:0007166;GO:0008152;GO:0008219;GO:0009056;GO:…		GO:0000502;GO:0005654;GO:0005829;GO:0022624;GO:0032991;GO:0043234;GO:0044422;GO:0044424;GO:0044428;GO:0044444;GO:0044446;GO:0044464	FFGNLAVMDSPQQICER	17	2	1	FFGNLAVMDSPQQIC[125.0477]ER	FFGNLAVMDSPQQIC[130.0791]ER	C	-0.453214	NaN	-0.429565	0.342185	-0.309198	0.328963	-0.653121	0.0386608	NaN	0.0989426	NaN	NaN	NaN	-0.769254	NaN	-0.303464	NaN	-0.229576	NaN	NaN	NaN	0.377564	NaN	0.372382	NaN	-0.954212	NaN	0.252848	-0.859432	-0.180087	NaN
	+	0.106699	1.61262	-0.387266	O95336	6-phosphogluconolactonase	PGLS	237	GO:0005975;GO:0005996;GO:0006006;GO:0006007;GO:0006066;GO:0006098;GO:0006139;GO:0006732;GO:0006733;GO:0006739;GO:0006740;GO:0006753;GO:0006807;GO:0008152;GO:0009051;GO:0009056;GO:0009117;GO:0009987;GO:0016052;GO:0019318;GO:0019320;GO:0019321;GO:0019362;GO:0034641;GO:0044237;GO:0044238;GO:0044262;GO:0044275;GO:0044281;GO:0044282;GO:0046164;GO:0046365;GO:0046483;GO:0046496;GO:0051186;GO:0055086;GO:…	GO:0003824;GO:0005488;GO:0005529;GO:0016787;GO:0016788;GO:0017057;GO:0030246;GO:0048029;GO:0052689	GO:0005829;GO:0031982;GO:0031988;GO:0043226;GO:0043227;GO:0043230;GO:0044421;GO:0044424;GO:0044444;GO:0044464;GO:0065010;GO:0070062	LCWFLDEAAAR	11	2	1	LC[125.0477]WFLDEAAAR	LC[130.0791]WFLDEAAAR	C	-0.631253	NaN	-0.967942	0.547155	NaN	-2.53515	-1.9217	-1.3379	NaN	-0.36443	-1.42732	NaN	0.485913	0.777901	NaN	0.699718	-0.839473	0.606519	NaN	NaN	NaN	0.273139	-4.00294	NaN	-0.651726	0.435717	-1.5469	-1.06156	0.365734	0.54537	-0.621442
	+	0.0513992	2.06238	-0.387573	O43707	Alpha-actinin-4	ACTN4	351	GO:0001666;GO:0001775;GO:0002028;GO:0002576;GO:0006810;GO:0006887;GO:0006950;GO:0006996;GO:0007010;GO:0007015;GO:0007043;GO:0007165;GO:0007596;GO:0007599;GO:0009987;GO:0010155;GO:0010941;GO:0010959;GO:0015031;GO:0016043;GO:0016192;GO:0022607;GO:0022898;GO:0030029;GO:0030036;GO:0030100;GO:0030168;GO:0030522;GO:0032409;GO:0032411;GO:0032412;GO:0032414;GO:0032415;GO:0032417;GO:0032501;GO:0032879;GO:…	GO:0000988;GO:0000989;GO:0001882;GO:0003712;GO:0003713;GO:0003779;GO:0005102;GO:0005178;GO:0005488;GO:0005509;GO:0005515;GO:0008092;GO:0008134;GO:0030374;GO:0032403;GO:0035257;GO:0042802;GO:0042803;GO:0042974;GO:0043167;GO:0043169;GO:0046872;GO:0046983;GO:0051015;GO:0051427	GO:0001725;GO:0005576;GO:0005615;GO:0005634;GO:0005737;GO:0005856;GO:0005911;GO:0005912;GO:0005924;GO:0005925;GO:0030018;GO:0030054;GO:0030055;GO:0030529;GO:0030863;GO:0031093;GO:0031143;GO:0031974;GO:0031982;GO:0031983;GO:0031988;GO:0032432;GO:0032991;GO:0034774;GO:0042641;GO:0042995;GO:0043005;GO:0043226;GO:0043227;GO:0043228;GO:0043229;GO:0043230;GO:0043231;GO:0043232;GO:0043233;GO:0043234;GO:…	CQLEINFNTLQTK	13	2	1	C[125.0477]QLEINFNTLQTK	C[130.0791]QLEINFNTLQTK	C	-1.22726	-1.68105	-1.32072	0.706684	-0.428369	-1.07506	-1.14666	1.62148	NaN	-1.28876	-1.54307	0.245563	0.949409	0.926487	-1.31334	1.14931	0.516838	1.77917	1.3107	NaN	NaN	0.773148	-0.291404	-1.0685	0.38278	1.9845	0.0655627	-0.337778	0.860929	1.25569	0.810338
+	+	0.00112281	4.05604	-0.389131	P30046	D-dopachrome decarboxylase	DDT	24	GO:0006582;GO:0008152;GO:0009058;GO:0009987;GO:0019748;GO:0042438;GO:0042440;GO:0044237;GO:0044249;GO:0046148	GO:0003824;GO:0004167;GO:0016829;GO:0016830;GO:0016831;GO:0016853;GO:0016860;GO:0016863;GO:0033981	GO:0005737;GO:0031982;GO:0031988;GO:0043226;GO:0043227;GO:0043230;GO:0044421;GO:0044424;GO:0044464;GO:0065010;GO:0070062	LCAAAASILGK	11	2	1	LC[125.0477]AAAASILGK	LC[130.0791]AAAASILGK	C	-1.9626	NaN	-1.84034	-0.437818	-1.9127	-1.25664	-1.47039	-0.336288	-1.36896	-1.38743	-1.5222	-1.091	NaN	-0.849147	NaN	-1.45612	-1.2505	-0.839355	-1.0844	-1.28732	-2.25367	-1.75287	-1.56825	-0.687438	-1.23743	0.486509	-1.51071	-1.51954	-2.40711	-2.08777	-1.34189
+	+	0	6.41351	-0.389777	P08133	Annexin A6	ANXA6	96	GO:0006461;GO:0006810;GO:0006811;GO:0006812;GO:0006816;GO:0006937;GO:0009987;GO:0016043;GO:0022607;GO:0030001;GO:0034220;GO:0043933;GO:0044057;GO:0050789;GO:0051234;GO:0051239;GO:0051259;GO:0051260;GO:0055085;GO:0065003;GO:0065007;GO:0070838;GO:0071822;GO:0071840;GO:0072511;GO:0090257	GO:0000166;GO:0005215;GO:0005216;GO:0005488;GO:0005496;GO:0005509;GO:0005515;GO:0005525;GO:0005543;GO:0005544;GO:0008289;GO:0015075;GO:0015267;GO:0015276;GO:0015485;GO:0017076;GO:0019001;GO:0022803;GO:0022834;GO:0022836;GO:0022838;GO:0022857;GO:0022891;GO:0022892;GO:0032553;GO:0032555;GO:0032561;GO:0032934;GO:0035639;GO:0042802;GO:0042803;GO:0043167;GO:0043169;GO:0046872;GO:0046983;GO:0048306	GO:0005765;GO:0005774;GO:0005912;GO:0005924;GO:0005925;GO:0010008;GO:0016020;GO:0016023;GO:0030054;GO:0030055;GO:0031090;GO:0031410;GO:0031902;GO:0031982;GO:0031988;GO:0042470;GO:0043226;GO:0043227;GO:0043229;GO:0043230;GO:0043231;GO:0044421;GO:0044422;GO:0044424;GO:0044437;GO:0044440;GO:0044444;GO:0044446;GO:0044464;GO:0048471;GO:0048770;GO:0065010;GO:0070062;GO:0070161	LIVGLMRPPAYCDAK	15	2;3	1	LIVGLMRPPAYC[125.0477]DAK	LIVGLMRPPAYC[130.0791]DAK	C	-0.79306	NaN	-0.755553	NaN	-0.640186	NaN	-0.717275	NaN	NaN	-0.794909	-0.379588	-0.0868993	-0.182143	0.58812	NaN	-0.00953771	-0.180325	-0.00873828	-0.866468	NaN	NaN	NaN	-0.787487	-0.134325	-0.690042	NaN	-0.823655	-0.773882	-0.944755	-0.866335	-1.10652
+	+	0.00474725	3.40817	-0.394563	P01023	Alpha-2-macroglobulin	A2M	431	GO:0001775;GO:0001868;GO:0001869;GO:0002576;GO:0002673;GO:0002682;GO:0002683;GO:0002697;GO:0002698;GO:0002920;GO:0002921;GO:0006810;GO:0006887;GO:0007165;GO:0007264;GO:0007596;GO:0007597;GO:0007599;GO:0008152;GO:0009892;GO:0009966;GO:0009987;GO:0010466;GO:0010468;GO:0010605;GO:0010951;GO:0010955;GO:0016043;GO:0016192;GO:0019222;GO:0019538;GO:0022411;GO:0022617;GO:0023051;GO:0030154;GO:0030168;GO:…	GO:0002020;GO:0004857;GO:0004866;GO:0004867;GO:0005102;GO:0005488;GO:0005515;GO:0019838;GO:0019899;GO:0019955;GO:0019956;GO:0019958;GO:0019959;GO:0019966;GO:0030234;GO:0030414;GO:0043120;GO:0048306;GO:0061134;GO:0061135	GO:0005576;GO:0005829;GO:0031093;GO:0031974;GO:0031982;GO:0031983;GO:0031988;GO:0034774;GO:0043226;GO:0043227;GO:0043230;GO:0043233;GO:0044421;GO:0044422;GO:0044424;GO:0044433;GO:0044444;GO:0044446;GO:0044464;GO:0060205;GO:0065010;GO:0070062;GO:0072562	SPCYGYQWVSEEHEEAHHTAYLVFSPSK	28	3;4;5	1	SPC[125.0477]YGYQWVSEEHEEAHHTAYLVFSPSK	SPC[130.0791]YGYQWVSEEHEEAHHTAYLVFSPSK	C	-3.79191	-3.34103	-3.72571	NaN	-3.43898	-2.70061	-3.2902	-2.77418	-3.3721	NaN	-3.3233	NaN	-2.88713	-2.21684	-3.16367	-2.95702	-2.70446	NaN	-3.82687	-3.53326	-4.20979	NaN	-3.32084	-2.85816	-3.14001	NaN	-3.11484	-1.23497	-3.95725	-3.08335	NaN
	+	0.13824	1.45412	-0.396206	P27816	Microtubule-associated protein 4	MAP4	635	GO:0000226;GO:0006928;GO:0006996;GO:0007010;GO:0007017;GO:0007018;GO:0007051;GO:0007052;GO:0009987;GO:0016043;GO:0022402;GO:0051012;GO:0051234;GO:0051293;GO:0051294;GO:0051301;GO:0051649;GO:0051656;GO:0071840;GO:0071841;GO:0071842	GO:0005198	GO:0005737;GO:0005819;GO:0005856;GO:0005874;GO:0005875;GO:0005886;GO:0015630;GO:0016020;GO:0031982;GO:0031988;GO:0032991;GO:0043226;GO:0043227;GO:0043228;GO:0043229;GO:0043230;GO:0043232;GO:0043234;GO:0044421;GO:0044422;GO:0044424;GO:0044430;GO:0044446;GO:0044464;GO:0065010;GO:0070062;GO:0072686	CSLPAEEDSVLEK	13	2	1	C[125.0477]SLPAEEDSVLEK	C[130.0791]SLPAEEDSVLEK	C	1.25104	NaN	1.49697	1.3038	NaN	1.32316	NaN	NaN	NaN	NaN	0.424598	1.43772	1.09457	0.957015	0.296065	0.849159	1.05988	1.3999	NaN	NaN	NaN	0.485106	NaN	0.710168	NaN	0.908515	NaN	NaN	2.00227	NaN	1.56216
	+	0.0692361	1.89356	-0.397948	O95817	BAG family molecular chaperone regulator 3	BAG3	179	GO:0006457;GO:0006917;GO:0006950;GO:0007420;GO:0008152;GO:0008624;GO:0008625;GO:0009266;GO:0009408;GO:0009605;GO:0009612;GO:0009628;GO:0009987;GO:0010468;GO:0010608;GO:0010656;GO:0010660;GO:0010662;GO:0010664;GO:0010941;GO:0010942;GO:0012502;GO:0019222;GO:0019538;GO:0021510;GO:0031647;GO:0032502;GO:0033554;GO:0034605;GO:0042981;GO:0043065;GO:0043066;GO:0043067;GO:0043068;GO:0043069;GO:0043170;GO:…		GO:0005737;GO:0005829;GO:0005886;GO:0016020;GO:0030018;GO:0042995;GO:0043005;GO:0044422;GO:0044424;GO:0044444;GO:0044449;GO:0044464	SQSPAASDCSSSSSSASLPSSGR	23	2	1	SQSPAASDC[125.0477]SSSSSSASLPSSGR	SQSPAASDC[130.0791]SSSSSSASLPSSGR	C	-0.626975	NaN	-0.906006	0.13637	NaN	-1.54689	NaN	0.000698768	NaN	-0.107744	-0.582032	-0.433839	-0.855207	-1.04962	NaN	-0.653536	-0.438808	-0.452885	NaN	NaN	-1.36828	-0.176041	-2.21376	-1.10147	-2.15996	-0.262876	NaN	0.495912	NaN	NaN	NaN
	+	0.174403	1.30745	-0.400324	P08571	Monocyte differentiation antigen CD14	CD14	187	GO:0001817;GO:0001819;GO:0002218;GO:0002221;GO:0002224;GO:0002237;GO:0002253;GO:0002376;GO:0002682;GO:0002684;GO:0002755;GO:0002756;GO:0002757;GO:0002758;GO:0002764;GO:0006810;GO:0006897;GO:0006909;GO:0006915;GO:0006950;GO:0006952;GO:0006954;GO:0006955;GO:0007165;GO:0007166;GO:0007243;GO:0007249;GO:0008219;GO:0009266;GO:0009408;GO:0009607;GO:0009611;GO:0009628;GO:0009987;GO:0010033;GO:0010035;GO:…	GO:0001530;GO:0001846;GO:0001847;GO:0001871;GO:0004871;GO:0004872;GO:0004888;GO:0005488;GO:0005515;GO:0005539;GO:0008329;GO:0016019;GO:0030246;GO:0030247;GO:0038023;GO:0042834;GO:0060089;GO:0070891	GO:0005576;GO:0005615;GO:0005886;GO:0009986;GO:0010008;GO:0016020;GO:0031090;GO:0031224;GO:0031225;GO:0031982;GO:0031988;GO:0043226;GO:0043227;GO:0043230;GO:0044421;GO:0044422;GO:0044424;GO:0044425;GO:0044440;GO:0044444;GO:0044446;GO:0044464;GO:0045121;GO:0065010;GO:0070062	VLSIAQAHSPAFSCEQVR	18	2;3	1	VLSIAQAHSPAFSC[125.0477]EQVR	VLSIAQAHSPAFSC[130.0791]EQVR	C	-4.26489	-3.98802	-4.27381	-4.66226	-4.6734	-4.08451	NaN	-3.45603	-3.45216	-3.65975	-4.36004	NaN	-3.70171	-2.16119	NaN	NaN	-4.36136	NaN	NaN	-3.82527	-6.12757	-3.77256	NaN	-3.18832	NaN	NaN	NaN	-2.07175	-4.5156	NaN	-2.66198
+	+	0.00742857	3.1603	-0.400492	P37837	Transaldolase	TALDO1	250	GO:0005975;GO:0005996;GO:0005997;GO:0005999;GO:0006006;GO:0006007;GO:0006066;GO:0006091;GO:0006098;GO:0006112;GO:0006139;GO:0006732;GO:0006733;GO:0006739;GO:0006740;GO:0006753;GO:0006807;GO:0008152;GO:0009056;GO:0009058;GO:0009117;GO:0009987;GO:0015980;GO:0016051;GO:0016052;GO:0019318;GO:0019320;GO:0019321;GO:0019322;GO:0019362;GO:0034637;GO:0034641;GO:0044237;GO:0044238;GO:0044249;GO:0044262;GO:…	GO:0003824;GO:0004801;GO:0016740;GO:0016744	GO:0005634;GO:0005737;GO:0005829;GO:0031982;GO:0031988;GO:0043226;GO:0043227;GO:0043229;GO:0043230;GO:0043231;GO:0044421;GO:0044424;GO:0044444;GO:0044464;GO:0065010;GO:0070062	ALAGCDFLTISPK	13	2	1	ALAGC[125.0477]DFLTISPK	ALAGC[130.0791]DFLTISPK	C	-0.0175192	-2.30211	-0.597995	-1.11015	-1.99234	NaN	-1.35891	-1.06689	NaN	-0.870849	-2.18719	-0.853312	-0.0608811	0.296343	-1.78661	-0.0106374	-0.869038	0.2838	-1.62266	-2.7234	NaN	0.883305	-1.48461	-0.28293	-0.413173	0.544164	-0.643852	-1.34185	-0.985263	-0.739469	-1.18938
+	+	0.000526316	4.61114	-0.401425	P07602	Prosaposin	PSAP	440	GO:0001775;GO:0002576;GO:0003006;GO:0006629;GO:0006643;GO:0006664;GO:0006665;GO:0006687;GO:0006810;GO:0006869;GO:0006887;GO:0007596;GO:0007599;GO:0008152;GO:0009966;GO:0009987;GO:0010033;GO:0010627;GO:0016192;GO:0019216;GO:0019222;GO:0022414;GO:0023051;GO:0030154;GO:0030168;GO:0030855;GO:0032501;GO:0032502;GO:0032940;GO:0040007;GO:0042221;GO:0043085;GO:0043408;GO:0044093;GO:0044237;GO:0044238;GO:…	GO:0005488;GO:0008047;GO:0008289;GO:0030234	GO:0005576;GO:0005615;GO:0005654;GO:0005730;GO:0005739;GO:0005765;GO:0005774;GO:0005775;GO:0005794;GO:0016020;GO:0016021;GO:0031090;GO:0031224;GO:0031974;GO:0031982;GO:0031988;GO:0043202;GO:0043226;GO:0043227;GO:0043228;GO:0043229;GO:0043230;GO:0043231;GO:0043232;GO:0043233;GO:0044421;GO:0044422;GO:0044424;GO:0044425;GO:0044428;GO:0044437;GO:0044444;GO:0044446;GO:0044464;GO:0065010;GO:0070013;GO:…	GCSFLPDPYQK	11	2	1	GC[125.0477]SFLPDPYQK	GC[130.0791]SFLPDPYQK	C	-3.52636	-3.80303	-3.13523	-2.19944	-3.28468	-2.40182	-2.97642	-2.49826	-3.10281	-3.03902	-3.53831	NaN	-2.81415	-2.47858	-2.78959	-2.26503	-2.86216	NaN	-2.65438	-3.06386	-3.4167	-2.20103	-4.69425	-2.37068	-3.35109	-2.33782	-3.17211	-2.86569	-4.07031	-3.92198	-3.1551
[truncated: 1,488 more rows]
[truncated: 109 more columns]

## Sheet: MSFragger_output
Peptide Sequence	Modified Peptide	Peptide Length	Charges	Label Count	Light Modified Peptide	Heavy Modified Peptide	amino_acid	position	Protein	Protein ID	Entry Name	Gene	Protein Description	10H_BD6_1_6470 Log2 Ratio HL	10T_BD5_1_6469 Log2 Ratio HL	11H_BD4_1_6468 Log2 Ratio HL	11T_BD3_1_6467 Log2 Ratio HL	12H_BD2_1_6466 Log2 Ratio HL	12T_BD1_1_6465 Log2 Ratio HL	13H_BC8_1_6464 Log2 Ratio HL	13T_BC7_1_6463 Log2 Ratio HL	14H_BC6_1_6462 Log2 Ratio HL	14T_BC5_1_6461 Log2 Ratio HL	15H_BC4_1_6460 Log2 Ratio HL	15T_BC3_1_6459 Log2 Ratio HL	16H_BC2_1_6458 Log2 Ratio HL	16T_BC1_1_6457 Log2 Ratio HL	17H_BB8_1_6453 Log2 Ratio HL	17T_BB7_1_6452 Log2 Ratio HL	18H_BB6_1_6451 Log2 Ratio HL	18T_BB5_1_6450 Log2 Ratio HL	19H_BB4_1_6449 Log2 Ratio HL	19T_BB3_1_6448 Log2 Ratio HL	1H_RB8_1_6491 Log2 Ratio HL	1T_RB7_1_6490 Log2 Ratio HL	20H_BA2_1_6439 Log2 Ratio HL	20T_BA1_1_6438 Log2 Ratio HL	21H_BA4_1_6441 Log2 Ratio HL	21T_BA3_1_6440 Log2 Ratio HL	22H_BA6_1_6443 Log2 Ratio HL	22T_BA5_1_6442 Log2 Ratio HL	23H_BA8_1_6445 Log2 Ratio HL	23T_BA7_1_6444 Log2 Ratio HL	24H_BB2_1_6447 Log2 Ratio HL	24T_BB1_1_6446 Log2 Ratio HL	25H_BB6_1_6404 Log2 Ratio HL	25T_BB5_1_6403 Log2 Ratio HL	26H_BB8_1_6409 Log2 Ratio HL	26T_BB7_1_6408 Log2 Ratio HL
[truncated: 18,926 more rows]
[truncated: 244 more columns]
