# Supplementary material for: Active Oxidative Metabolism and Impaired Glyoxalase System Under Increased Intracellular Oxidative Stress in Non-Small Cell Lung Cancer
Source: Research Square preprint supplement (doi:10.21203/rs.3.rs-4535848/v1), 2024-06-19
Supplement: Supplementary file 2 [file 93a7e59b42a64f84260ad8ba.xlsx]

## Sheet: global.modsummary
Modification	Mass Shift	10H_PSMs	10T_PSMs	11H_PSMs	11T_PSMs	12H_PSMs	12T_PSMs	13H_PSMs	13T_PSMs	14H_PSMs	14T_PSMs	15H_PSMs	15T_PSMs	16H_PSMs	16T_PSMs	17H_PSMs	17T_PSMs	18H_PSMs	18T_PSMs	19H_PSMs	19T_PSMs	1H_PSMs	1T_PSMs	20H_PSMs	20T_PSMs	21H_PSMs	21T_PSMs	22H_PSMs	22T_PSMs	23H_PSMs	23T_PSMs	24H_PSMs	24T_PSMs	25H_PSMs	25T_PSMs	26H_PSMs	26T_PSMs	27H_PSMs	27T_PSMs	28H_PSMs	28T_PSMs	29H_PSMs	29T_PSMs	2H_PSMs	2T_PSMs	30H_PSMs	30T_PSMs	31H_PSMs	31T_PSMs
None	0	45758	33797	49544	43664	35150	40678	36675	52559	28263	48036	41837	40443	43653	62112	38275	60422	57197	70814	44200	27984	26505	41231	45122	42513	50290	75538	35050	53583	47705	44498	46996	57662	40490	53370	45972	64930	53102	74471	41814	71732	53480	69125	29638	35959	47515	52764	48622	46020
D5 N-ethylmaleimide on cysteines	130.079	10663	9393	10104	10780	8518	11191	7382	9964	8803	8974	9394	6533	8888	11253	8548	9275	9476	8739	7760	6541	8291	11202	8526	5036	8703	8780	6783	9520	9507	7960	7772	8617	6518	8758	9126	6976	6302	9132	9417	9466	7259	7350	7976	9746	8540	6443	7202	6828
D5 N-ethylmaleimide+water on cysteines	148.09	5595	5345	5454	6254	4641	6852	3901	5533	5712	4280	4708	3426	4753	6203	5078	4661	4211	4146	4371	3569	5896	6974	4275	2233	4267	3585	3585	3517	4805	3764	3954	3753	3407	4896	3971	3431	2994	4123	5381	5256	3531	3337	4943	6085	4366	3126	3479	3322
N-ethylmaleimide on cysteines	125.048	3824	1524	4166	4300	3613	3396	3764	4935	3113	4917	4188	3052	2984	5117	3201	4659	5282	6456	3973	3241	2884	3693	3907	4828	4471	7406	2812	5758	3887	3272	3687	4934	4434	3272	4188	5696	4447	6428	3642	6130	4154	6609	3998	4216	3981	4598	4252	4368
Nethylmaleimidehydrolysis	143.058	2738	1325	2743	3274	2474	2779	2449	3569	2124	3508	2346	2408	1994	3511	2048	2990	2939	3858	2259	2386	2932	3153	2269	2532	2798	4405	1799	3021	2443	1935	2203	2735	2415	2236	2112	3841	2581	3924	2444	4353	2617	4547	3096	3663	2316	2583	2298	2594
First isotopic peak	1.00235	2256	1860	2526	2439	1660	1945	1888	2634	1312	2473	2041	1835	2021	3067	1754	2915	2698	3382	2083	1639	1123	2179	1943	1870	2446	3826	1610	2550	2420	2216	2059	2697	1928	2500	1983	3013	2263	3416	1965	3431	2252	3341	1540	1790	2033	2262	2300	2177
Deamidation	0.984016	1820	2497	1907	1834	1299	1519	1387	1918	967	1954	1521	1318	1446	2248	1412	2125	2018	2428	1602	1581	799	1676	1388	1380	1954	2788	1225	1931	1946	1799	1707	1946	1403	2087	1378	2388	1733	2697	1512	2640	1760	2535	1209	1311	1530	1745	1745	1618
Acetaldehyde +26	26.0157	533	1264	251	743	274	153	844	260	180	1059	434	183	49	35	102	87	1376	192	215	803	188	225	2196	950	542	1607	271	6621	1300	1485	2263	392	1883	678	7194	1179	1180	2469	896	65	3539	1692	164	143	1444	1469	1627	3181
Isotopic peak error	-1.00235	1082	971	1281	1171	857	882	910	1389	567	1306	997	745	999	1845	798	1586	1492	1879	1053	854	587	899	1069	971	1318	2342	769	1544	1165	985	1083	1381	1054	1262	1319	1798	1195	2169	1036	2050	1358	1971	705	773	1104	1340	1168	1187
Second isotopic peak	2.0047	1047	705	1065	1096	716	895	772	1146	500	1182	845	721	838	1366	705	1285	1166	1496	839	715	511	995	835	733	1096	1638	661	1018	1026	1017	916	1170	806	1192	831	1352	978	1531	823	1492	1023	1395	596	834	818	916	914	932
Pyro-glu from Q/Loss of ammonia	-17.0265	766	656	779	869	563	676	585	911	463	844	660	596	671	982	546	896	1014	1073	635	557	785	772	979	616	771	1265	514	953	796	686	767	761	643	911	841	1084	761	1301	644	1219	921	1105	467	644	751	756	806	822
Third isotopic peak	3.00705	824	755	879	921	708	731	694	917	623	826	726	526	667	984	601	898	909	1072	795	668	658	884	709	572	809	1142	685	826	849	735	705	804	711	978	762	1045	775	1119	726	1050	813	931	713	739	652	742	746	690
Dehydration/Pyro-glu from E	-18.0106	891	854	712	982	699	685	501	887	782	767	738	444	479	988	697	700	1375	543	622	726	1542	827	1728	552	615	1218	531	1646	850	589	908	317	887	858	1338	1073	498	1200	694	1090	1278	815	552	698	837	671	899	763
Oxidation or Hydroxylation	15.9949	365	225	444	588	526	408	367	336	364	367	424	356	182	400	403	240	277	331	401	387	335	357	313	276	874	143	324	268	533	701	564	239	412	140	453	453	340	199	503	214	396	250	449	380	252	236	373	340
Addition of lysine due to transpeptidation/Addition of K	128.095	398	306	431	478	408	415	425	465	375	486	410	321	327	392	408	472	498	461	401	404	587	454	481	368	436	484	281	539	397	367	527	353	518	441	492	405	380	559	461	494	628	538	415	434	404	464	457	388
dihydroxy	31.9898	213	140	277	315	256	206	307	236	128	335	254	197	140	255	189	249	242	347	262	300	122	242	222	225	439	273	168	150	383	406	369	309	288	257	305	482	339	333	414	259	359	310	229	247	228	341	315	339
2-amino-3-oxo-butanoic_acid	-2.01565	288	276	290	309	226	280	269	264	198	259	269	251	166	248	223	236	299	366	266	310	254	307	240	219	265	297	192	237	290	267	236	278	277	276	277	314	255	315	372	280	353	333	248	291	224	257	311	257
Dehydroalanine (from Cysteine)	-33.9877	246	217	242	230	204	222	224	234	169	237	207	132	148	178	157	145	179	193	164	211	227	247	166	148	203	193	184	211	200	189	173	161	189	224	171	211	168	194	155	184	185	184	223	234	145	167	184	220
carbamidomethylated Cys that undergoes beta-elimination and Michael addition of methylamine	-2.94552	192	151	238	178	176	152	108	206	116	166	140	171	210	292	147	279	251	273	195	107	103	191	159	171	170	292	105	187	189	136	149	196	139	244	188	261	202	312	131	307	191	239	97	130	193	172	152	156
Addition of Q	128.059	151	131	166	214	201	147	222	208	137	209	179	62	70	133	152	142	191	218	193	240	155	167	164	191	184	297	114	213	217	170	202	174	282	134	225	214	154	232	181	188	241	204	185	178	187	218	232	188
Unannotated mass-shift -3.9762	-3.9762	161	143	171	161	124	159	138	195	99	173	148	94	122	255	122	233	199	243	145	124	102	147	128	122	156	312	110	197	176	150	145	202	138	195	201	250	170	277	170	288	177	265	105	146	134	170	175	170
Deletion of V	-99.0684	167	192	174	181	188	137	165	205	210	158	228	110	268	220	220	306	213	108	179	233	320	157	292	116	162	169	147	254	192	125	198	110	260	180	277	149	144	161	197	155	237	126	154	141	180	171	197	190
Formylation	27.9949	138	153	144	202	201	159	264	159	177	192	160	78	56	88	149	90	93	108	162	231	188	157	148	143	154	103	116	178	185	149	111	106	219	93	237	147	110	103	183	117	196	134	223	181	154	194	181	208
Phosphorylation	79.9663	131	76	167	201	120	112	108	208	124	173	103	68	36	211	107	159	160	247	117	146	243	197	182	136	176	430	102	119	117	107	155	113	158	104	140	306	84	194	147	327	207	282	110	125	135	110	171	134
4-methyl-delta-1-pyrroline-5-carboxyl	109.053	170	133	156	163	172	151	183	193	191	169	143	93	54	123	129	108	162	167	138	165	224	158	178	101	156	234	90	196	153	116	125	116	171	112	198	108	89	181	179	163	165	171	180	174	134	139	180	139
tryptophan oxidation to kynurenin	3.99492	132	151	125	141	134	106	144	182	85	147	139	97	101	141	127	149	118	180	143	167	92	117	102	104	134	161	102	104	146	136	97	132	146	156	91	167	126	152	156	153	136	184	118	100	105	139	122	144
Addition of arginine due to transpeptidation/Addition of R	156.101	88	165	81	112	67	67	113	91	48	123	108	84	107	121	77	130	132	99	91	122	95	122	155	105	101	140	190	337	120	157	210	93	213	139	395	129	115	179	83	124	314	110	50	48	124	169	148	229
Unannotated mass-shift -26.0216	-26.0216	149	126	124	136	104	132	108	142	86	134	105	89	119	174	101	174	133	181	120	156	101	145	103	74	151	198	92	182	133	112	109	141	95	143	131	150	102	170	93	192	115	142	97	118	105	134	104	130
Unannotated mass-shift -16.9570	-16.957	179	94	142	178	118	137	120	167	90	155	119	90	115	179	120	150	133	163	120	88	129	141	125	72	148	179	62	141	130	101	111	138	103	136	128	131	93	162	127	143	117	136	82	129	116	117	115	111
13C4 Methionine label	4.01342	129	105	150	117	118	140	96	161	89	141	115	101	115	187	117	177	161	199	120	82	67	128	101	105	128	191	99	126	144	121	103	137	131	157	94	159	115	188	98	149	110	151	126	116	101	123	98	106
Deletion of I/Deletion of L	-113.084	142	118	141	132	119	114	112	163	108	136	131	86	194	230	105	216	229	161	124	106	201	129	237	114	142	209	90	237	155	108	172	102	126	118	181	149	116	220	107	190	173	148	125	146	129	117	127	130
Unannotated mass-shift -3.0478	-3.0478	90	74	133	85	71	106	87	139	67	119	90	87	107	207	75	180	159	242	86	46	56	99	101	107	105	258	68	150	102	95	95	169	101	124	107	247	152	264	79	266	107	289	67	97	129	145	119	129
Methylation	14.0157	95	102	102	63	98	110	96	92	74	86	102	85	99	134	80	135	131	199	131	127	61	104	103	83	130	160	84	118	113	117	102	135	130	173	115	131	125	173	108	143	114	136	84	89	107	135	117	108
Lysine oxidation to aminoadipic semialdehyde	-1.03163	106	84	134	101	81	79	123	155	65	98	96	47	64	157	72	150	128	146	91	92	48	80	88	80	114	198	58	70	93	84	85	116	106	124	97	194	114	171	112	155	120	169	78	76	92	135	120	130
Sodium adduct	21.9819	131	91	133	127	115	128	142	117	79	142	157	49	32	68	58	61	60	137	112	126	50	112	50	54	99	139	92	92	108	96	77	85	162	108	113	168	94	172	146	118	132	190	145	106	81	118	106	142
Addition of O	114.079	123	105	130	100	90	126	66	141	82	121	119	70	106	164	112	129	113	117	101	55	72	127	95	50	98	144	69	113	87	69	83	123	63	77	100	91	78	129	161	127	90	102	89	132	87	77	81	88
deuterated methyl ester	17.0345	61	54	86	80	61	92	87	78	45	134	56	54	46	40	61	56	34	143	94	59	44	110	35	61	89	55	165	39	78	103	57	147	64	82	48	77	75	52	56	36	45	111	98	103	46	62	62	70
Unannotated mass-shift -1.0664	-1.0664	99	53	91	72	46	55	36	96	25	85	58	46	72	182	43	157	132	140	58	29	24	64	72	69	87	203	31	92	74	64	67	114	42	117	60	179	93	178	54	166	70	134	30	44	69	86	69	55
monomethylation	18.0378	61	46	66	65	69	43	58	52	82	57	44	25	40	50	41	54	84	53	114	84	215	111	92	31	73	55	996	186	51	111	71	40	90	50	54	51	15	43	40	42	102	39	52	73	37	44	134	165
Deletion of A	-71.0371	87	131	67	208	70	95	62	141	47	94	66	57	97	149	54	114	83	139	47	45	87	89	110	50	65	190	57	131	72	75	74	70	84	100	114	131	88	152	42	131	86	114	42	78	127	114	58	107
Pyro-Glu from E + Methylation	-3.99492	80	50	105	87	47	70	59	94	37	97	51	51	63	116	54	119	110	117	46	43	42	75	79	63	80	142	54	109	92	67	60	84	61	111	91	152	84	168	69	155	88	137	43	70	70	83	89	98
Unannotated mass-shift -31.0526	-31.0526	74	32	84	58	40	75	46	104	27	85	41	57	83	161	54	115	106	137	57	34	34	68	69	78	70	222	34	101	72	42	66	125	52	84	60	131	94	157	30	148	67	143	45	62	61	74	63	70
proline oxidation to pyroglutamic acid/Tryptophan oxidation to oxolactone/aldehyde and ketone modifications	13.9793	57	94	82	61	80	54	99	67	62	58	70	37	28	49	47	41	71	53	87	111	77	67	75	44	109	52	42	46	86	78	94	52	125	38	89	107	51	55	105	57	82	71	86	70	91	106	90	114
Unannotated mass-shift -2.9262	-2.9262	72	46	86	64	42	70	35	110	21	79	57	44	69	163	60	135	112	115	48	19	40	87	57	41	83	189	31	116	55	68	53	92	29	88	74	137	86	141	62	159	78	116	34	71	61	83	58	60
Condensation product of 3-deoxyglucosone/S-(2-dimethylsuccinyl) cysteine	144.042	88	52	95	112	108	107	107	111	96	107	81	44	29	49	77	61	59	64	80	134	96	99	57	102	95	66	66	71	70	56	82	65	119	45	74	71	48	68	82	57	93	92	140	126	68	72	80	81
di-Methylation/Acetaldehyde +28/Ethylation	28.0313	50	53	42	57	41	31	76	49	28	59	46	38	37	45	45	51	66	67	55	62	31	34	57	50	65	71	41	149	75	65	75	57	107	82	137	68	80	104	61	63	111	75	37	22	74	79	84	105
Deletion of F	-147.068	73	61	62	78	71	62	70	80	51	58	66	49	89	105	57	98	95	50	74	58	54	74	86	109	59	97	50	88	73	53	74	69	60	63	74	108	94	80	57	106	62	91	41	56	100	96	70	60
lactic acid from N-term Ser/ISD (z+2)-series	-15.0109	57	82	72	65	48	57	51	73	40	53	56	31	61	60	50	52	69	106	69	59	43	77	48	43	77	92	41	76	56	47	57	59	56	67	53	65	55	87	61	99	76	99	50	60	46	55	71	57
13C(9) 15N(1) Silac label	10.0272	23	31	27	18	24	19	23	21	16	25	23	16	21	11	24	15	36	38	17	28	7	17	47	14	17	54	20	230	35	45	56	33	36	50	271	26	40	118	35	21	100	80	15	12	34	31	53	118
tryptophan oxidation to hydroxykynurenin	19.9898	76	88	88	91	62	71	59	84	51	57	81	61	47	82	54	62	63	92	55	44	64	88	50	9	73	65	40	46	63	44	53	44	43	52	57	66	24	45	88	81	61	67	56	64	64	31	37	42
Unannotated mass-shift -127.0586	-127.059	68	36	69	65	36	57	51	56	35	85	52	30	58	51	45	61	59	55	40	20	22	51	85	45	55	62	44	103	61	48	38	67	32	62	58	65	59	99	59	66	48	71	19	63	71	69	56	56
Ammonium-quenched monolink of BS2-G crosslinker	113.048	74	78	62	66	56	48	55	55	65	65	45	20	52	59	62	43	56	47	55	71	75	41	75	37	54	57	49	48	75	71	39	41	74	83	59	48	42	50	33	55	61	33	46	46	53	44	54	52
Replacement of 3 protons by aluminium	23.9581	52	50	62	81	59	42	60	72	39	67	53	23	26	47	44	38	42	70	67	65	19	60	42	37	66	114	49	54	56	50	47	44	67	51	35	65	37	52	43	52	58	71	47	55	30	62	69	89
Unannotated mass-shift 408.2496	408.25	76	79	90	36	51	73	43	41	87	50	58	19	56	30	46	35	54	22	37	56	44	61	88	43	41	16	62	17	81	77	64	40	64	119	49	53	54	30	15	20	41	18	51	97	44	28	47	51
Unannotated mass-shift -8.0108	-8.0108	57	60	42	61	37	69	43	57	35	53	32	18	43	73	38	47	40	74	49	30	44	73	50	29	68	62	40	43	58	38	57	49	37	47	52	48	37	58	46	76	52	59	47	55	43	47	37	43
Deletion of O	-114.079	46	2	55	48	39	52	53	66	29	99	54	25	41	56	38	65	56	91	31	9	10	46	58	39	61	72	37	61	37	49	35	57	25	62	57	68	81	101	53	65	62	114	14	58	64	57	47	52
Unannotated mass-shift 185.1158	185.116	44	72	41	51	46	56	54	38	71	52	50	37	49	40	58	59	52	43	47	44	79	68	75	52	37	66	40	58	51	55	66	37	57	70	58	39	103	85	78	49	72	40	77	64	62	60	43	41
Loss of C-terminal K from Heavy Chain of MAb/Deletion of K	-128.095	50	109	52	58	43	47	47	53	37	79	78	57	131	97	79	132	58	55	64	103	41	65	31	48	41	37	39	52	55	40	44	46	44	82	46	69	83	64	36	55	29	26	40	50	68	107	51	54
Representative mass and accurate mass for 116 & 117/mTRAQ medium	144.102	46	33	42	50	34	38	31	51	17	26	32	32	43	89	30	81	64	71	41	25	20	40	33	36	31	72	19	66	34	41	32	43	39	52	44	66	58	66	25	65	45	79	28	31	39	49	32	36
Unannotated mass-shift 369.2064	369.206	51	41	46	41	70	55	38	53	103	39	65	19	20	27	66	19	48	37	55	45	65	38	36	48	51	29	37	53	58	29	57	46	59	19	61	19	28	28	82	22	41	32	99	65	56	37	48	48
Unannotated mass-shift -1.0926	-1.0926	62	29	53	33	27	25	24	64	8	49	35	38	34	84	26	73	58	72	30	23	12	39	34	36	41	110	12	52	43	29	30	67	23	68	36	76	52	108	20	101	46	70	8	33	38	46	37	35
alpha-amino adipic acid	14.9633	35	29	38	30	22	26	25	45	19	44	24	34	36	77	14	66	35	102	26	27	22	39	24	23	41	114	26	53	25	42	31	33	40	28	30	90	44	89	27	107	30	84	36	48	33	33	30	41
reduction	-15.9949	44	42	42	44	41	33	39	44	31	52	33	23	33	39	40	38	49	47	40	44	45	27	54	33	29	75	25	62	46	61	48	37	62	86	54	63	50	66	38	51	62	70	40	39	40	53	48	50
DMPO spin-trap nitrone adduct	111.068	68	56	48	82	58	51	57	55	79	57	58	28	12	20	61	30	55	14	45	72	81	57	72	39	55	15	53	52	55	44	46	22	59	24	53	28	22	20	75	17	67	22	61	70	47	50	62	42
formaldehyde adduct	12	38	40	40	59	103	46	47	33	59	26	43	17	5	12	49	12	19	35	56	63	85	57	44	43	21	21	36	56	39	31	34	15	74	25	40	29	10	18	52	12	52	25	60	68	21	35	40	36
Unannotated mass-shift 17.0486	17.0486	51	27	42	86	33	69	44	55	32	66	30	30	26	35	39	40	26	48	57	37	50	80	30	14	44	59	66	46	34	27	30	50	22	37	28	36	27	40	38	40	20	52	39	52	28	34	46	35
Unannotated mass-shift 64.9236	64.9236	56	45	60	44	56	63	50	60	31	86	61	20	4	25	27	28	17	59	58	50	12	51	15	14	44	38	27	20	50	46	20	37	39	40	17	43	18	28	38	28	19	72	66	59	15	39	30	38
mTRAQ heavy	148.109	33	22	36	36	25	26	27	21	18	31	29	9	23	25	34	23	35	20	57	18	29	37	21	6	39	21	822	59	37	42	25	18	34	30	26	18	15	28	25	32	46	13	31	42	15	19	68	97
Bruker Daltonics SERVA-ICPL(TM) quantification chemistry, +10 Da form	115.067	33	58	41	45	30	31	42	60	22	47	49	25	40	49	32	49	36	26	34	30	28	33	52	27	44	65	40	52	35	35	45	29	42	40	49	53	42	41	40	51	64	49	33	48	42	39	40	50
Acetylation	42.0106	37	42	30	109	35	34	49	44	32	53	31	24	9	21	32	28	79	44	53	27	38	47	50	29	41	43	45	36	45	41	36	38	53	31	38	47	20	44	42	40	50	49	42	44	29	51	48	49
Dimethylation of proline residue	29.0391	14	8	11	22	21	13	17	15	12	19	14	11	10	13	9	20	48	14	52	53	72	121	19	19	24	11	485	136	15	41	31	15	84	20	26	32	13	18	21	17	34	14	8	19	36	28	76	64
hydroxymethyl/formaldehyde induced modifications	30.0106	20	29	30	35	64	44	49	37	46	25	28	31	41	26	51	47	37	53	29	46	34	62	26	26	23	33	36	43	33	34	29	30	52	48	40	40	32	41	66	65	31	28	55	32	35	23	43	18
Unannotated mass-shift -0.1200	-0.12	28	25	24	34	27	32	29	52	18	39	32	34	44	66	29	53	50	66	18	14	21	40	37	33	23	68	27	51	30	37	29	29	28	53	18	49	31	69	21	63	26	48	27	25	40	35	31	30
N-Succinimidyl-2-morpholine acetate	127.063	43	12	45	38	37	17	44	45	24	44	27	20	15	49	19	40	37	69	41	26	24	32	27	24	42	89	24	32	33	31	22	35	36	28	29	53	33	67	21	67	56	92	32	41	32	39	39	34
Replacement of 2 protons by calcium	37.9469	44	38	37	39	26	22	28	36	19	35	25	15	14	28	18	14	42	47	33	33	11	37	39	28	33	68	24	37	41	33	43	25	33	38	37	38	20	56	33	49	42	58	28	29	24	37	36	46
cysteine oxidation to cysteic acid	47.9847	15	9	26	21	25	13	30	11	13	33	17	26	10	25	9	12	16	19	18	22	8	27	20	15	61	13	20	17	46	62	60	20	41	14	39	58	20	10	26	9	43	5	21	13	8	20	21	23
Iodoacetic acid derivative	58.0055	55	43	35	70	55	63	38	37	75	37	41	11	17	11	47	24	19	23	34	56	53	65	26	13	25	29	25	26	44	20	10	13	57	21	30	29	17	14	50	31	36	18	64	62	22	35	29	24
Removal of initiator methionine from protein N-terminus, then acetylation of the new N-terminus	-89.0299	37	16	44	52	35	43	26	47	26	42	30	24	26	39	41	36	31	38	35	23	25	45	32	32	41	58	37	35	33	34	33	41	35	42	30	43	42	40	21	34	31	42	28	49	33	28	34	29
cyano	24.9952	33	33	26	41	61	30	39	28	31	39	28	14	3	3	22	11	33	20	57	76	47	57	24	24	32	11	51	45	41	49	18	9	73	16	36	24	20	5	33	9	37	17	43	27	31	39	48	42
Unannotated mass-shift -4.1510	-4.151	34	30	37	26	14	22	24	36	11	36	21	25	37	40	24	46	39	35	19	13	15	29	31	27	30	57	11	27	32	22	26	27	22	43	30	48	24	49	21	63	25	51	16	23	27	26	22	28
N-ethylmaleimide on cysteine sulfenic acid	141.043	18	8	17	70	47	20	41	21	24	46	26	34	15	17	28	8	25	36	25	111	40	49	17	25	17	21	20	26	15	26	19	19	78	16	17	39	21	28	29	17	52	15	64	49	22	27	28	35
Acetylhypusine/Addition of I/Addition of L	113.084	24	33	30	38	32	33	24	38	30	29	37	34	103	61	74	101	30	25	41	36	32	28	30	32	27	31	26	26	26	39	38	32	47	48	32	24	56	46	19	40	28	30	31	27	43	50	28	34
Carbamylation	43.0058	28	55	41	40	24	26	47	42	21	34	35	16	8	5	25	8	31	30	39	37	32	44	20	23	34	20	23	23	35	34	26	23	45	17	27	20	15	18	32	9	29	20	49	45	30	33	30	32
Hexose	162.053	36	31	39	35	34	25	47	34	22	34	39	22	12	15	35	20	23	15	40	43	28	31	22	31	46	16	27	18	39	32	32	17	36	30	27	36	26	18	35	23	42	39	35	26	35	39	35	26
Unannotated mass-shift -13.0426	-13.0426	20	18	18	29	13	32	16	37	7	40	13	20	27	51	11	43	26	77	16	26	20	21	18	18	20	52	12	24	28	27	22	31	15	30	20	37	34	66	14	53	30	68	30	30	30	34	22	30
Proline oxidation to pyrrolidinone/Decarboxylation	-30.0106	10	33	32	19	39	31	26	33	21	26	23	27	32	37	25	21	27	68	18	42	23	20	30	13	17	53	15	30	17	16	24	34	21	65	23	42	26	44	25	53	41	48	21	24	21	26	26	28
Unannotated mass-shift -5.1104	-5.1104	23	14	34	20	18	20	14	37	7	39	9	10	27	47	14	38	48	43	18	10	5	15	25	19	40	66	11	38	30	25	30	50	21	46	30	66	37	86	20	86	39	69	6	15	25	34	36	39
dimethylation	36.0757	13	4	15	8	5	9	7	16	3	11	8	9	10	26	5	14	14	16	18	2	0	11	4	8	58	16	631	30	8	126	14	14	10	12	6	19	11	10	9	8	21	11	6	8	9	16	43	43
Unannotated mass-shift 241.1792	241.179	34	25	23	43	25	25	26	39	28	30	36	23	17	35	17	19	37	34	22	8	27	32	29	20	30	51	14	34	25	26	31	29	20	22	34	31	24	50	20	44	44	34	17	26	30	28	34	18
Deletion of T	-101.048	29	33	24	39	23	28	14	30	23	30	29	21	27	36	26	38	40	26	22	21	37	28	54	20	21	43	28	86	27	13	26	16	15	22	54	21	27	40	16	35	42	23	18	22	19	21	27	35
Addition of F	147.068	28	22	36	33	26	22	26	26	18	29	23	18	21	28	20	22	21	15	19	24	20	27	34	35	29	20	31	14	23	21	26	29	24	36	27	40	25	28	22	36	19	23	32	32	36	36	23	27
quinone	29.9742	19	10	18	17	40	18	32	15	17	22	14	23	14	10	17	16	11	15	27	37	18	19	16	11	21	4	20	16	27	28	27	15	27	19	26	39	25	14	34	8	27	7	20	19	24	29	26	25
Tris-quenched monolink of DSS/BS3 crosslinker	259.142	29	25	30	26	28	41	28	19	27	30	33	8	16	19	34	17	31	24	35	22	14	39	17	17	33	16	22	25	32	32	25	22	26	6	32	9	9	15	30	12	25	15	31	42	24	28	28	20
Deletion of N	-114.043	17	31	21	32	23	18	13	20	21	17	24	12	30	34	20	17	24	33	25	17	43	27	27	17	16	32	15	34	21	17	19	18	12	17	29	32	25	34	40	27	30	30	14	13	29	19	19	15
Deletion of Q	-128.059	40	22	32	40	19	35	16	31	11	33	25	25	31	34	15	31	49	25	13	23	28	22	37	18	22	42	13	25	28	23	26	16	17	24	30	36	23	34	7	35	39	27	10	20	21	21	25	26
monoglutamyl/Nmethylmaleimidehydrolysis/Photo-induced Proline adduct/Addition of E	129.043	15	18	23	14	27	18	18	28	15	23	20	16	11	10	11	12	23	21	19	36	26	17	19	17	18	21	16	26	33	11	16	12	28	8	17	23	22	19	49	19	34	20	33	14	11	20	17	23
Unannotated mass-shift -137.0854	-137.085	31	29	32	30	34	22	27	29	23	23	30	13	20	20	33	19	23	18	33	22	28	29	27	20	21	10	25	13	26	26	17	14	37	12	13	12	9	10	28	17	15	14	33	36	24	31	20	19
5-hydroxy-N6,N6,N6-trimethyl	59.0497	34	20	33	41	18	25	26	30	21	27	24	13	12	14	26	29	17	22	18	18	20	40	15	12	19	30	26	23	13	13	15	15	22	19	18	28	16	30	26	15	18	21	27	33	20	23	20	15
Unannotated mass-shift 480.1902	480.19	42	36	38	26	42	29	38	28	46	35	33	0	22	23	26	20	15	1	28	30	56	35	17	10	17	7	23	9	21	15	14	16	14	34	18	31	20	9	0	23	16	10	37	35	12	16	19	19
Unannotated mass-shift 279.1772	279.177	20	31	35	30	41	46	12	44	39	15	48	13	8	10	38	6	12	10	35	27	40	36	16	4	33	4	31	11	17	20	7	10	17	12	15	6	5	1	45	7	12	5	63	46	16	10	29	13
Addition of Y	163.063	15	14	17	14	27	20	14	11	36	12	25	9	29	21	21	11	26	11	16	16	21	16	25	79	16	13	19	6	15	12	33	42	14	12	23	42	37	20	18	48	14	18	18	17	64	44	16	13
Unannotated mass-shift -149.0296	-149.03	27	20	23	28	35	35	21	27	53	14	28	14	16	8	40	17	23	5	32	33	47	23	32	24	16	6	26	23	16	11	18	16	32	4	44	7	14	3	29	7	22	11	36	22	24	22	22	13
Unannotated mass-shift 209.1772	209.177	16	36	15	20	28	11	60	23	24	16	36	7	0	0	11	6	15	5	28	44	24	9	16	10	18	3	33	17	28	19	51	8	69	10	41	13	4	6	37	4	28	6	40	13	18	31	23	26
Proline oxidation to 5-hydroxy-2-aminovaleric acid	18.0106	24	25	29	18	19	21	16	7	42	28	17	2	17	9	14	9	10	4	24	26	30	20	38	9	8	4	35	13	33	37	24	6	22	40	15	25	19	25	23	21	17	20	16	17	7	12	16	17
Unannotated mass-shift -89.0840	-89.084	21	21	26	26	27	17	28	27	20	18	18	13	13	9	25	19	19	10	26	40	33	26	24	20	29	7	26	25	19	18	18	14	36	19	31	11	19	4	16	6	25	14	23	25	25	27	24	21
Deuterium Methylation of Lysine	16.0282	26	27	17	14	15	17	10	16	9	21	8	10	12	23	9	14	8	18	15	15	22	33	23	10	18	15	35	30	16	16	11	11	25	25	18	23	14	17	16	16	12	28	5	12	15	10	22	21
ubiquitinylation residue/Double Carbamidomethylation/Addition of N	114.043	11	25	20	12	17	9	11	19	20	18	11	12	20	16	23	20	29	27	18	15	28	17	31	19	15	19	14	17	24	25	37	15	20	30	21	27	23	16	24	30	20	16	11	22	18	17	15	23
Unannotated mass-shift 345.2074	345.207	36	29	20	31	30	56	14	24	61	22	28	11	13	18	41	16	16	8	20	9	52	48	20	4	19	5	11	24	23	5	9	6	17	7	15	6	6	7	39	11	5	9	49	51	18	3	7	8
Carboxylation	43.9898	12	18	16	34	25	11	25	7	8	16	27	6	11	12	25	12	18	16	27	27	15	17	8	11	14	11	31	16	16	22	17	16	28	18	18	12	15	21	22	9	21	13	19	14	16	21	20	21
Unannotated mass-shift 359.2202	359.22	13	12	14	17	13	21	8	18	29	8	26	12	25	20	31	22	14	7	18	11	32	20	14	13	11	12	14	26	7	7	17	7	34	4	43	7	10	8	30	13	9	12	17	27	68	39	20	43
octanoyl	126.104	21	19	27	36	30	17	24	24	28	21	23	11	9	14	20	14	19	16	24	17	27	26	21	9	20	9	21	23	25	14	18	12	27	10	25	14	13	8	22	12	25	14	27	23	17	22	24	22
Unannotated mass-shift -109.0474	-109.047	16	3	26	30	6	21	8	20	10	31	10	7	23	26	19	30	22	20	2	2	7	23	21	10	26	25	9	19	7	12	15	10	7	36	9	14	15	38	24	30	21	44	18	16	22	19	7	22
4-Oxononenal (ONE)	154.099	15	25	13	20	15	9	37	13	15	8	20	3	3	2	11	5	7	4	26	13	17	12	10	8	19	3	33	17	27	18	19	6	35	6	15	4	10	6	14	5	14	8	18	17	12	23	18	20
tri-Methylation/Propyl	42.047	18	18	17	27	14	19	18	32	14	27	18	15	15	26	16	18	20	30	22	12	23	28	11	16	10	18	41	24	13	14	17	14	15	16	11	18	13	19	13	22	15	19	11	25	14	16	16	10
N-Acetylhexosamine	203.079	16	14	16	24	13	15	10	16	6	13	17	7	8	27	13	14	24	27	23	23	27	22	17	22	12	28	14	22	8	8	23	14	20	16	11	24	21	40	21	32	33	25	18	21	18	24	15	12
Deletion of H	-137.059	23	18	22	12	9	18	17	16	11	20	13	13	10	11	19	15	13	17	9	16	22	21	18	8	11	16	8	18	17	11	11	13	17	16	23	10	13	16	10	14	18	18	16	20	18	14	12	10
In Bachi as Formylaspargine (typo?)	4.97893	16	9	12	11	15	11	19	31	7	14	15	10	12	14	9	16	14	16	16	13	10	14	11	11	11	30	5	10	13	14	11	16	17	19	7	20	16	13	10	17	9	13	14	13	5	17	11	18
Unannotated mass-shift 82.0784	82.0784	8	32	4	23	8	7	59	6	10	28	5	2	16	3	6	8	5	1	13	34	19	11	11	6	9	4	1	7	6	21	3	4	10	33	11	44	6	7	22	6	7	8	20	10	6	17	25	23
Deletion of G	-57.0215	17	9	9	12	10	9	13	12	13	8	9	11	12	18	8	6	43	22	6	4	11	13	9	8	14	36	7	9	21	10	14	12	19	22	13	21	20	28	19	19	18	31	8	11	17	15	15	13
Cysteinylation	119.004	10	38	10	8	14	9	16	9	17	17	14	37	19	12	15	14	18	36	18	24	17	9	17	15	17	8	14	7	20	17	12	12	19	32	10	17	45	21	34	12	15	14	12	12	11	15	22	25
MDA adduct +54/Methylglyoxal-derived hydroimidazolone/Alkene fragment of DSSO crosslinker	54.0106	28	17	13	98	21	9	14	13	25	10	12	2	3	4	14	5	3	1	10	35	18	13	9	5	3	3	4	15	6	13	8	1	25	6	27	10	2	4	15	2	14	7	25	38	5	20	12	13
N-isopropylcarboxamidomethyl/Addition of V	99.0684	9	4	14	8	14	11	18	23	18	15	19	28	101	57	56	110	13	7	27	10	11	8	13	15	9	7	5	7	14	9	20	6	25	41	13	11	34	17	11	20	16	6	8	6	23	24	19	11
Unannotated mass-shift 390.1910	390.191	14	14	15	12	17	18	17	18	18	16	16	14	16	8	12	13	10	11	9	11	21	18	10	17	14	15	10	16	13	8	15	13	9	20	16	13	15	13	14	13	17	11	12	17	20	11	12	15
glycidamide adduct/Addition of S	87.032	8	11	20	7	10	11	8	9	9	8	12	6	17	15	5	14	12	15	9	15	8	7	11	5	11	17	11	12	10	9	9	2	26	10	14	14	14	10	5	9	14	9	7	6	9	14	14	11
mTRAQ light/Water quenched monolink of DMP crosslinker	140.095	9	13	10	5	16	6	11	13	5	12	11	1	2	2	4	4	14	4	5	25	9	3	16	5	8	4	13	32	13	16	14	4	23	12	25	12	7	5	12	2	22	9	9	10	10	14	19	23
Propionate labeling reagent heavy form (+3amu), N-term K	59.0363	8	8	21	17	20	14	7	17	20	13	18	11	21	10	17	17	10	18	17	15	28	16	15	12	9	17	8	12	10	18	13	8	6	13	7	10	13	19	13	9	7	13	10	11	7	16	9	11
Unannotated mass-shift 335.1610	335.161	8	13	8	11	17	5	14	10	14	8	11	4	3	2	11	3	9	4	17	25	16	16	10	7	10	3	7	6	8	12	6	5	23	6	9	12	4	1	20	2	15	6	15	10	9	9	14	11
Unannotated mass-shift -111.0988	-111.099	12	2	19	13	7	26	7	12	9	14	9	16	10	21	10	13	17	18	1	1	16	20	10	9	10	17	1	16	3	4	1	5	0	7	11	9	4	19	16	12	8	14	4	15	11	4	5	9
2-ammonio-6-[4-(hydroxymethyl)-3-oxidopyridinium-1-yl]- hexanoate	108.021	10	13	9	18	10	11	9	13	12	12	13	0	4	13	5	4	5	9	12	26	43	9	19	11	5	10	5	16	10	12	8	1	27	12	17	12	3	11	2	10	14	5	13	18	2	4	9	11
Homoserine lactone/Prompt loss of side chain from oxidised Met	-48.0034	17	11	15	25	13	13	17	21	14	12	12	6	6	5	11	9	10	11	14	14	21	14	10	6	13	8	13	10	10	15	12	6	20	6	15	6	4	6	8	2	11	5	13	14	2	11	14	13
Replacement of 2 protons by iron	53.9193	11	13	9	10	15	12	17	21	7	12	6	8	3	3	9	3	3	6	10	9	2	14	5	3	7	2	3	3	11	8	6	7	28	15	9	16	9	7	22	9	14	10	20	18	10	31	8	17
carboxyethyl/Dihydroxy methylglyoxal adduct/Ethoxyformylation	72.0211	6	15	8	22	16	6	12	13	18	7	17	7	6	1	8	2	8	6	13	42	21	20	12	3	9	9	5	8	6	5	12	5	38	10	8	7	13	11	11	5	10	7	19	15	8	10	16	15
Deamidation followed by a methylation	14.9997	14	10	15	30	2	11	9	4	6	5	7	4	5	3	6	5	21	8	3	4	22	77	6	0	8	4	13	8	2	19	11	4	13	2	5	9	5	49	6	20	3	10	6	41	2	7	9	13
Cleavage product of EGS protein crosslinks by hydroylamine treatment/Addition of D	115.027	12	6	13	8	12	7	14	18	10	15	8	10	5	6	8	9	5	5	8	16	19	15	7	7	10	7	11	7	6	7	7	13	10	17	2	12	13	15	10	6	5	9	12	15	7	21	12	11
Deletion of C	-103.009	10	13	8	9	14	11	12	8	9	5	10	12	11	7	11	8	12	16	15	14	10	13	9	8	8	11	8	6	9	9	8	12	10	18	8	8	7	5	7	5	6	11	10	6	7	9	14	9
Homoserine	-29.9928	8	5	13	6	12	6	10	2	10	6	14	4	13	10	12	11	13	16	15	19	8	7	6	11	9	13	4	12	11	12	3	4	21	19	13	3	17	9	12	18	10	10	8	6	12	12	13	6
Methionine oxidation to aspartic semialdehyde	-32.0085	9	9	15	12	18	14	12	15	12	14	10	0	5	2	8	2	5	4	12	19	9	9	15	12	17	5	10	10	11	12	10	5	14	6	12	4	5	7	8	8	7	8	18	15	10	6	6	7
Unannotated mass-shift 227.1626	227.163	8	7	19	18	21	6	11	16	7	16	17	5	2	6	7	14	16	13	16	23	9	9	18	4	12	11	8	16	16	10	15	7	23	7	20	9	8	5	8	10	37	11	20	9	7	10	17	12
Propionaldehyde +40	40.0313	5	14	4	4	7	0	14	1	1	4	6	0	0	0	1	0	4	1	3	19	2	0	16	11	3	0	1	15	14	11	13	0	24	1	32	12	2	0	9	0	28	0	3	2	9	13	16	19
Unannotated mass-shift 261.0968	261.097	14	13	11	5	7	9	5	9	11	15	6	0	4	5	9	4	6	0	6	6	1	6	6	6	8	8	13	3	15	11	9	1	13	21	3	8	10	9	2	8	7	4	11	8	4	6	4	14
Unannotated mass-shift 26.0752	26.0752	5	16	5	5	6	7	12	4	5	8	9	8	6	1	7	6	3	6	7	12	1	4	5	3	3	2	5	18	11	6	8	7	18	6	19	2	13	5	7	2	7	6	8	8	11	8	11	18
maleimide	97.0164	13	14	15	9	17	7	16	16	11	10	13	3	1	7	7	3	15	4	9	22	24	8	18	14	3	8	11	9	13	10	14	4	19	10	14	8	5	13	9	9	18	5	11	9	14	13	15	7
glycosyl-L-hydroxyproline	148.037	14	13	8	8	8	10	8	7	5	8	6	4	6	6	7	11	10	6	7	8	8	11	11	9	11	1	6	9	9	14	6	6	13	9	12	6	10	15	11	9	8	13	6	4	12	13	10	15
Acrylamide adduct/Addition of A	71.0371	3	2	7	3	15	2	5	7	3	4	3	8	21	12	15	25	22	10	19	3	1	6	8	13	3	0	12	7	5	5	11	5	4	14	6	5	18	19	3	15	8	4	10	4	8	7	5	4
13C(6) 15N(2) Silac label	8.0142	3	5	1	8	4	1	1	0	0	0	2	0	2	1	0	0	9	0	2	17	10	0	22	2	0	0	3	33	4	3	8	1	23	0	51	1	0	1	7	1	25	1	0	1	8	8	12	15
Unannotated mass-shift 443.2410	443.241	10	9	9	9	13	13	6	14	25	8	18	9	8	5	25	13	11	3	18	14	26	12	12	11	5	8	4	9	9	4	8	6	20	8	11	8	14	5	17	8	10	4	12	8	13	10	10	7
Unannotated mass-shift 421.2224	421.222	12	7	12	13	16	36	3	11	50	2	17	11	2	1	22	5	5	3	17	4	30	23	5	7	6	1	9	5	7	3	4	6	3	0	1	7	10	3	39	8	4	5	32	24	7	9	7	1
Deletion of S	-87.032	8	8	7	10	4	7	4	9	3	9	6	9	11	8	4	10	9	11	3	2	3	11	9	5	8	22	7	8	7	6	5	6	3	13	7	16	9	14	4	11	11	8	3	8	9	8	7	3
Unannotated mass-shift -7.9352	-7.9352	5	11	3	4	2	2	2	4	1	4	2	2	5	12	4	6	9	8	2	2	2	8	7	5	6	15	3	21	8	4	1	8	5	9	11	19	7	14	6	13	14	13	2	3	9	8	8	5
Unannotated mass-shift 256.0634	256.063	5	0	8	0	1	1	2	6	3	2	1	1	4	2	2	0	4	8	7	7	3	0	2	2	2	2	31	6	3	35	4	2	18	6	8	17	24	2	15	2	2	2	3	0	7	6	17	19
Unannotated mass-shift 0.1380	0.138	4	5	11	5	7	3	4	4	5	11	11	6	9	9	5	5	9	11	8	3	7	10	10	4	0	15	6	7	3	7	4	6	6	13	2	14	6	7	8	10	8	5	7	4	5	2	6	8
Unannotated mass-shift 471.2092	471.209	6	5	8	1	5	1	2	3	2	2	2	3	9	11	3	9	18	9	3	1	5	0	12	14	8	13	4	10	2	8	14	11	10	3	9	10	12	10	7	12	17	9	2	0	13	11	15	7
3-fold methylation with fully labelled methyl groups	54.1135	7	4	6	10	14	5	10	8	9	6	6	0	1	2	6	5	3	4	7	8	6	2	4	6	4	6	26	3	3	14	4	7	15	4	7	8	4	4	8	5	14	6	10	9	12	6	10	8
Unannotated mass-shift 461.1920	461.192	9	8	9	5	5	5	4	7	4	6	4	3	3	2	9	4	6	4	2	11	7	7	6	9	5	3	4	2	5	8	9	2	9	3	5	6	3	2	4	2	9	2	12	8	8	9	6	8
Unannotated mass-shift -130.0854	-130.085	0	5	3	5	3	2	3	5	4	2	3	0	1	6	5	6	7	7	1	2	3	2	13	5	7	10	2	11	2	9	1	4	9	5	17	8	6	16	3	8	8	12	0	1	8	6	9	11
Unannotated mass-shift 49.0870	49.087	5	6	8	9	18	19	3	9	27	4	7	0	0	1	9	1	8	0	11	3	15	15	7	7	1	0	5	9	4	1	7	0	11	0	9	0	1	0	7	0	7	0	23	13	3	2	10	0
Pyrrolidone from Proline	-27.9949	5	4	9	4	5	5	5	4	5	4	3	8	3	5	6	5	7	9	3	3	1	3	3	4	8	7	3	7	5	6	6	7	2	7	2	16	9	11	3	5	8	5	4	5	2	2	5	4
Deletion of P	-97.0528	6	3	3	17	5	5	4	7	3	5	5	4	6	6	5	10	6	9	4	7	4	6	4	1	3	10	9	3	8	2	4	6	8	1	6	3	3	4	9	2	5	7	4	10	3	8	5	6
Unannotated mass-shift -1.8536	-1.8536	7	0	6	6	5	4	0	9	7	1	5	3	4	10	6	4	9	3	3	1	4	9	0	5	3	9	2	3	4	5	8	5	4	5	7	4	7	11	3	14	3	7	4	10	7	5	3	2
Unannotated mass-shift -50.0190	-50.019	4	4	1	6	7	4	4	8	11	1	5	2	0	1	2	1	4	2	2	16	4	2	4	1	0	3	5	4	5	2	3	0	12	8	8	5	1	1	4	0	12	0	7	3	3	3	3	4
Unannotated mass-shift 250.1626	250.163	5	5	7	8	6	8	7	4	10	6	9	1	6	6	9	3	3	0	4	1	7	4	1	0	6	1	7	7	8	4	4	0	2	2	6	2	1	0	10	4	1	1	4	8	4	0	3	4
Tryptophan oxidation to dihydroxy-N-formaylkynurenine	63.9797	1	0	4	4	2	0	3	1	0	15	2	7	1	1	3	3	2	2	1	1	0	6	4	2	10	6	1	2	7	7	11	4	1	1	4	11	3	2	1	3	10	1	0	2	1	1	1	0
CLIP_TRAQ_3	271.149	4	4	4	6	6	2	7	4	6	9	8	1	1	2	5	1	7	9	5	8	15	7	2	5	6	14	9	9	4	6	4	3	9	2	7	5	1	6	7	6	4	6	12	7	2	5	8	4
reaction with phenyl vinyl sulfone	168.024	4	10	4	2	9	7	10	6	8	5	6	0	1	2	3	1	1	0	8	10	2	3	5	2	8	2	2	1	7	8	4	2	7	7	6	0	2	2	8	0	6	0	7	8	0	3	6	11
Nmethylmaleimide/BuUr fragment of BuUrBu crosslinker	111.032	3	2	6	2	7	0	6	8	5	3	7	0	1	4	3	2	4	2	8	9	0	4	2	2	3	8	7	2	2	5	3	1	6	1	3	6	2	1	7	2	4	0	11	8	2	3	8	5
Unannotated mass-shift 314.1580	314.158	2	4	4	4	3	2	1	5	4	7	2	3	7	5	2	3	8	8	2	4	4	5	7	14	3	11	3	9	2	1	6	3	4	9	6	4	5	11	4	6	6	7	0	0	12	6	3	7
S-(2-succinyl) cysteine	116.011	6	7	4	6	8	5	10	7	6	6	1	1	2	10	3	2	10	2	3	2	8	4	2	5	4	4	2	2	0	0	4	0	8	2	4	3	10	11	2	3	4	7	12	4	3	2	2	2
Side reaction of PG with Side chain of aspartic or glutamic acid	154.074	2	0	2	1	2	3	0	1	0	5	2	22	0	0	1	2	2	1	8	6	2	3	1	1	2	0	14	2	2	1	2	0	11	4	8	0	2	1	2	1	5	2	3	6	1	4	10	26
Aspartylurea	-10.032	4	4	1	3	3	1	6	3	3	3	3	0	0	0	3	2	6	0	4	5	2	4	4	4	13	4	2	1	4	7	10	6	12	1	4	6	2	1	5	1	8	4	2	1	9	9	6	14
Unannotated mass-shift 456.2544	456.254	7	5	5	6	9	13	4	8	17	5	6	0	0	1	9	1	4	0	8	4	12	9	7	2	4	1	4	10	3	1	4	0	6	1	6	1	0	0	11	0	4	0	11	8	4	4	5	5
Removal of initiator methionine from protein N-terminus/Deletion of M	-131.04	5	8	3	3	1	2	0	4	2	1	1	2	3	7	1	3	14	7	0	6	15	2	15	0	1	7	1	9	1	2	9	5	2	2	8	8	2	12	7	12	10	2	0	1	3	4	3	6
Oxidised 2H(3) labelled Methionine	19.0137	3	3	2	6	1	2	7	5	0	1	2	0	0	0	2	2	3	1	0	2	2	2	3	2	4	1	5	2	7	4	6	3	7	1	12	5	3	1	2	2	3	1	1	1	13	8	8	11
Unannotated mass-shift -3.7664	-3.7664	3	0	3	3	5	4	6	1	5	5	5	2	1	2	5	3	5	2	5	2	1	1	4	1	9	3	5	1	8	7	6	6	2	7	4	3	3	5	6	2	5	3	4	2	4	4	4	3
13C6 labeled ubiquitinylation residue	120.063	2	4	3	6	6	7	6	6	3	3	2	2	5	4	4	4	3	5	3	4	3	1	4	4	4	1	5	5	3	7	4	7	4	1	3	6	3	4	2	3	4	0	1	3	4	3	3	2
Hydroxyphenylglyoxal arginine/Chemical modification of the diiodinated sites of thyroglobulin by Suzuki reaction	132.021	4	0	3	7	5	4	3	4	5	4	3	0	2	5	3	6	2	4	4	1	2	3	3	5	3	3	2	3	1	2	4	6	6	3	4	3	6	5	5	3	5	2	3	2	5	3	5	5
pyrophosphorylation of Ser/Thr	159.933	1	1	1	6	2	4	1	4	1	8	2	0	1	5	3	7	1	13	2	0	3	5	0	2	4	14	3	1	3	2	0	3	1	3	2	4	3	2	6	11	5	9	2	2	3	4	4	1
Unannotated mass-shift -0.1974	-0.1974	5	4	6	2	4	4	3	2	1	4	6	4	5	1	5	2	4	4	3	4	1	4	1	3	3	4	1	4	3	4	3	3	1	6	3	5	3	5	3	4	3	2	3	4	1	4	2	1
Unannotated mass-shift 341.9860	341.986	1	3	7	0	0	6	8	4	1	13	4	3	2	0	6	3	1	6	7	4	0	0	0	3	13	0	8	2	5	11	0	8	6	2	6	10	10	15	21	8	0	25	1	4	5	12	7	25
Acetyl_13C(6) 15N(2) Silac label	50.0248	2	6	1	2	6	1	20	4	5	4	1	0	0	0	4	1	0	0	5	14	8	6	2	0	0	0	7	0	1	1	2	0	6	0	1	4	0	0	7	0	2	0	4	3	0	5	0	2
glutathione disulfide	305.068	7	2	2	20	5	9	5	16	8	11	2	11	0	0	1	0	0	4	5	5	10	22	2	1	0	0	3	5	0	0	0	0	2	1	1	3	2	2	10	0	4	2	8	14	3	2	1	2
Unannotated mass-shift -147.0538	-147.054	5	3	2	3	5	1	2	2	3	2	4	3	1	2	4	2	2	2	3	3	4	2	3	3	3	1	1	1	3	1	3	1	5	0	4	3	4	2	1	3	3	3	2	2	5	4	4	3
Unannotated mass-shift -59.0840	-59.084	1	1	2	1	0	2	1	0	0	4	2	3	1	2	2	2	1	2	1	1	1	3	0	3	3	4	1	1	1	3	2	2	0	3	3	5	3	4	1	5	2	4	0	3	1	0	3	0
Label:2H(6)15N(1)	7.0347	3	1	0	0	1	2	1	0	0	0	1	0	2	0	1	0	4	0	1	1	1	2	0	0	0	0	0	0	1	0	1	1	2	0	0	0	0	1	4	11	3	1	1	0	1	1	0	0
Unannotated mass-shift -128.1624	-128.162	6	3	4	4	5	4	3	4	4	4	3	2	0	0	3	2	1	0	3	6	8	4	2	0	1	0	3	0	2	1	0	0	1	0	1	0	0	1	2	0	0	0	3	5	1	1	2	2
Unannotated mass-shift 15.0512	15.0512	0	1	2	0	1	0	4	1	1	0	3	0	2	0	0	0	1	0	0	1	1	1	0	0	0	1	3	2	0	0	0	4	2	6	0	2	2	0	0	0	0	0	0	0	0	0	0	0
Cys modification by (1-oxyl-2,2,5,5-tetramethyl-3-pyrroline-3-methyl)methanesulfonate (MTSL)	184.08	0	0	0	4	0	0	1	0	0	0	0	0	3	0	1	3	0	0	0	0	2	0	1	0	1	0	1	1	2	3	0	0	1	2	2	0	3	0	3	2	2	0	2	0	0	0	3	2
Unannotated mass-shift -27.9062	-27.9062	0	0	1	0	0	1	0	1	0	1	0	0	0	1	0	1	0	2	2	0	0	1	0	0	1	2	0	0	0	0	0	2	0	0	0	1	1	2	0	2	0	2	0	1	0	1	0	1
[truncated: 232 more columns]

## Sheet: MG-H1 directed
Significant	negative log FDR corrected p-value	log2 FC Healthy to Tumor	Modified Sequence	Protein	Assigned Modifications	Protein ID	Entry Name	Gene	Protein Description	GOBP	GOMF	GOCC	Start	End	10H	10T	11H	11T	12H	12T	13H	13T	14H	14T	15H	15T	16H	16T	17H	17T	18H	18T	19H	19T	1H	1T	20H	20T	21H	21T	22H	22T	23H	23T	24H	24T	25H	25T	26H
+	10.9032	3.7604	RAPSPVK[54.0106]PASLER[54.0106]	sp|Q9BYB0|SHAN3_HUMAN	13R(54.0106),7K(54.0106)	Q9BYB0	SHAN3_HUMAN	SHANK3	SH3 and multiple ankyrin repeat domains protein 3	GO:0000165;GO:0003008;GO:0006884;GO:0006996;GO:0007165;GO:0007416;GO:0007610;GO:0007611;GO:0007612;GO:0007613;GO:0007638;GO:0008104;GO:0008361;GO:0009653;GO:0009887;GO:0009966;GO:0009967;GO:0009987;GO:0010469;GO:0010639;GO:0010646;GO:0010647;GO:0010720;GO:0010975;GO:0016043;GO:0019725;GO:0021773;GO:0021879;GO:0021953;GO:0022603;GO:0022607;GO:0022898;GO:0023051;GO:0023056;GO:0030030;GO:0030154;GO:…	GO:0003779;GO:0005102;GO:0005488;GO:0005515;GO:0008092;GO:0008270;GO:0017124;GO:0019904;GO:0030159;GO:0030160;GO:0030674;GO:0035254;GO:0035255;GO:0035591;GO:0043167;GO:0043169;GO:0043621;GO:0046872;GO:0046914;GO:0060090;GO:0097110	GO:0005829;GO:0005886;GO:0014069;GO:0016020;GO:0031090;GO:0031253;GO:0042995;GO:0043005;GO:0043197;GO:0043226;GO:0044309;GO:0060170;GO:0098588;GO:0098590;GO:0098794;GO:0099572;GO:0110165;GO:0120025	1574	1586	18.0714	20.9313	17.6909	12.8157	21.6047	20.6431	18.7171	13.1672	22.088	12.7292	17.8057	14.2512	12.9145	12.0631	20.5754	12.534	13.7051	13.4383	20.4837	19.3944	20.4208	13.6881	13.2673	12.2537	11.6264	11.6608	16.3882	12.2836	20.0219	17.9069	19.6371	12.1024	12.9122	13.1613	13.0549
+	7.60218	3.57121	KVVQLDVR[54.0106]DNMVK[54.0106]	sp|O95831|AIFM1_HUMAN	13K(54.0106),8R(54.0106)	O95831	AIFM1_HUMAN	AIFM1	Apoptosis-inducing factor 1, mitochondrial	GO:0000302;GO:0001101;GO:0002931;GO:0006810;GO:0006839;GO:0006915;GO:0006919;GO:0006950;GO:0006979;GO:0006996;GO:0007154;GO:0007165;GO:0008104;GO:0008219;GO:0009605;GO:0009628;GO:0009636;GO:0009719;GO:0009725;GO:0009893;GO:0009894;GO:0009987;GO:0009991;GO:0010033;GO:0010035;GO:0010243;GO:0010257;GO:0010604;GO:0010950;GO:0010952;GO:0012501;GO:0014070;GO:0015031;GO:0016043;GO:0019219;GO:0019222;GO:…	GO:0000166;GO:0003676;GO:0003677;GO:0003824;GO:0003954;GO:0005488;GO:0005515;GO:0016174;GO:0016491;GO:0016651;GO:0036094;GO:0043167;GO:0043168;GO:0046983;GO:0050660;GO:0050664;GO:0071949;GO:0072572;GO:0097159;GO:0097367;GO:1901265;GO:1901363	GO:0005634;GO:0005737;GO:0005739;GO:0005743;GO:0005758;GO:0005829;GO:0016020;GO:0019866;GO:0031090;GO:0031966;GO:0031970;GO:0031974;GO:0043226;GO:0043227;GO:0043229;GO:0043231;GO:0043233;GO:0048471;GO:0070013;GO:0110165	232	244	20.329	20.2172	13.7616	12.2675	22.1073	19.6966	21.6569	12.6776	20.9572	13.4091	21.9842	13.6376	18.1776	12.1212	21.0845	18.9037	12.8033	17.7743	12.0294	22.6634	12.4804	13.5607	13.9044	12.5111	12.3209	12.6328	20.9567	13.0948	21.3368	21.9778	21.2053	19.3362	22.2454	12.054	12.0608
+	6.37541	3.39689	YGTGLWTHDKNNFEALEATK[54.0106]	sp|O57203|KITH_VACCA	20K(54.0106)	O57203	KITH_VACCA	OPG101	Thymidine kinase				46	65	13.8611	22.4135	22.3429	12.5094	13.5542	13.241	13.4704	13.0135	13.4169	13.5356	12.8039	13.7055	12.5377	16.6973	22.7493	20.3284	21.6107	17.4731	22.7925	23.9496	12.0431	13.0692	22.1085	22.3485	12.4804	16.438	12.7408	15.0047	22.4058	17.0099	12.7158	16.8475	17.3015	12.7526	22.2741
+	8.11253	3.38142	DKTSDLVEEYFEAHSSSK[54.0106]VLTSDR	sp|Q13416|ORC2_HUMAN	18K(54.0106)	Q13416	ORC2_HUMAN	ORC2	Origin recognition complex subunit 2	GO:0000122;GO:0006139;GO:0006259;GO:0006270;GO:0006355;GO:0006357;GO:0006725;GO:0006807;GO:0008152;GO:0009889;GO:0009890;GO:0009892;GO:0009987;GO:0010468;GO:0010556;GO:0010558;GO:0010605;GO:0019219;GO:0019222;GO:0031323;GO:0031324;GO:0031326;GO:0031327;GO:0034641;GO:0043170;GO:0044237;GO:0044238;GO:0045892;GO:0045934;GO:0046483;GO:0048519;GO:0048523;GO:0050789;GO:0050794;GO:0051171;GO:0051172;GO:…	GO:0003676;GO:0003677;GO:0003688;GO:0003690;GO:0005488;GO:0043565;GO:0097159;GO:1990837	GO:0000781;GO:0000785;GO:0000792;GO:0000808;GO:0000939;GO:0005634;GO:0005654;GO:0005664;GO:0005813;GO:0005815;GO:0016020;GO:0032991;GO:0032993;GO:0043226;GO:0043227;GO:0043229;GO:0043231;GO:0098687;GO:0110165;GO:0140513	234	257	13.2204	13.057	11.7232	13.1723	20.0259	12.9745	13.4347	12.2678	20.1	13.4698	12.9028	13.1116	17.1752	12.7136	13.4857	17.9279	12.4201	11.1893	12.7632	20.3909	11.7488	13.4549	13.8968	20.8504	19.7406	12.5593	12.2376	12.107	20.2024	12.6624	12.7247	18.0313	21.3978	16.9015	13.5415
+	8.13367	3.34321	PGGCSR[54.0106]GPAAGDGRLR	sp|Q13641|TPBG_HUMAN	6R(54.0106)	Q13641	TPBG_HUMAN	TPBG	Trophoblast glycoprotein	GO:0001667;GO:0003008;GO:0006935;GO:0007154;GO:0007155;GO:0007267;GO:0007268;GO:0007610;GO:0007611;GO:0007612;GO:0007635;GO:0008104;GO:0008285;GO:0008306;GO:0008355;GO:0009653;GO:0009966;GO:0009967;GO:0009968;GO:0009987;GO:0010646;GO:0010647;GO:0010648;GO:0016043;GO:0016477;GO:0023051;GO:0023052;GO:0023056;GO:0023057;GO:0030030;GO:0030111;GO:0030178;GO:0032101;GO:0032103;GO:0032501;GO:0032502;GO:…		GO:0005783;GO:0005886;GO:0009986;GO:0016020;GO:0030425;GO:0042995;GO:0043005;GO:0043226;GO:0043227;GO:0043229;GO:0043231;GO:0043679;GO:0044306;GO:0098793;GO:0110165;GO:0120025	2	17	13.3112	12.3568	12.9784	13.0279	12.9591	13.4877	14.7818	11.6682	14.4862	12.3741	12.4198	12.2771	12.8806	12.9413	19.2888	11.5475	12.2991	12.176	17.7794	13.3027	12.0307	12.6014	13.5606	13.0484	13.5584	11.5593	13.4111	13.0137	22.4186	12.0948	13.9427	11.6605	13.2035	12.9607	13.5553
+	9.98958	3.27896	LLLAAK[54.0106]SLSVDPGAPNAK[54.0106]	sp|Q9Y4G6|TLN2_HUMAN	18K(54.0106),6K(54.0106)	Q9Y4G6	TLN2_HUMAN	TLN2	Talin-2	GO:0007043;GO:0007155;GO:0009987;GO:0016043;GO:0022607;GO:0034329;GO:0034330;GO:0045216;GO:0071840;GO:0098609	GO:0003779;GO:0005102;GO:0005178;GO:0005198;GO:0005200;GO:0005488;GO:0005515;GO:0008092;GO:0044877;GO:0050839;GO:0051015	GO:0001726;GO:0005737;GO:0005856;GO:0005886;GO:0005925;GO:0015629;GO:0016020;GO:0030054;GO:0030055;GO:0042995;GO:0043226;GO:0043228;GO:0043229;GO:0043232;GO:0045202;GO:0070161;GO:0110165;GO:0120025	1317	1334	19.7238	20.2546	19.5255	12.458	21.2255	21.0104	19.3483	19.5586	22.3909	12.566	20.6473	17.9133	13.3081	13.287	20.9644	11.81	12.9453	11.5657	20.463	20.8804	14.1584	13.5892	20.1688	17.9581	18.5361	14.8196	19.699	13.1956	19.2396	17.2892	19.2523	14.9827	19.9473	11.9689	20.5101
+	9.03526	3.06614	KIVIR[54.0106]PEPNLFHDGR[54.0106]EHSVHVER[54.0106]	sp|P24043|LAMA2_HUMAN	15R(54.0106),23R(54.0106),5R(54.0106)	P24043	LAMA2_HUMAN	LAMA2	Laminin subunit alpha-2	GO:0001894;GO:0007155;GO:0007411;GO:0007517;GO:0009966;GO:0009967;GO:0009987;GO:0010001;GO:0010646;GO:0010647;GO:0014037;GO:0016043;GO:0023051;GO:0023056;GO:0030030;GO:0030154;GO:0030155;GO:0030334;GO:0031175;GO:0032222;GO:0032224;GO:0032501;GO:0032502;GO:0035633;GO:0040012;GO:0042592;GO:0045595;GO:0045597;GO:0045785;GO:0045995;GO:0048513;GO:0048518;GO:0048522;GO:0048583;GO:0048584;GO:0048856;GO:…	GO:0005102;GO:0005198;GO:0005488;GO:0005515	GO:0005576;GO:0005604;GO:0005886;GO:0016020;GO:0030054;GO:0030312;GO:0031012;GO:0031594;GO:0032991;GO:0042383;GO:0042995;GO:0043005;GO:0043083;GO:0043197;GO:0044309;GO:0045202;GO:0062023;GO:0098636;GO:0098637;GO:0098794;GO:0110165;GO:0120025	2608	2630	20.3261	13.2907	20.1795	12.0966	12.5125	12.0804	20.019	11.8801	13.5258	12.4088	14.1437	18.2598	14.2015	13.0308	21.2042	11.9729	12.0689	11.3212	20.8587	14.1651	11.8756	12.9041	20.2827	18.3694	13.2094	12.6673	20.0496	20.0753	15.208	17.5773	13.29	12.3733	20.4948	13.3203	20.6937
+	5.57506	3.05158	SLCASTLTVSSGSSR[54.0106]GSLASSRGSLASSR	sp|Q9ULE0|WWC3_HUMAN	15R(54.0106)	Q9ULE0	WWC3_HUMAN	WWC3	Protein WWC3	GO:0000122;GO:0006355;GO:0006357;GO:0009889;GO:0009890;GO:0009892;GO:0009966;GO:0009968;GO:0009987;GO:0010468;GO:0010556;GO:0010558;GO:0010605;GO:0010646;GO:0010648;GO:0016477;GO:0019219;GO:0019222;GO:0023051;GO:0023057;GO:0031323;GO:0031324;GO:0031326;GO:0031327;GO:0035330;GO:0035331;GO:0040008;GO:0045892;GO:0045926;GO:0045934;GO:0046620;GO:0046621;GO:0048519;GO:0048523;GO:0048583;GO:0048585;GO:…	GO:0005488;GO:0005515;GO:0019899;GO:0019900;GO:0060090	GO:0005737;GO:0005829;GO:0110165	355	383	21.7142	22.0019	21.8111	12.5018	22.7387	13.8606	22.5876	13.2039	22.6018	12.5439	22.0064	12.4962	13.3979	12.4785	18.6013	13.3997	15.6697	12.2355	18.968	23.5387	13.2066	13.1419	19.8653	11.7866	11.8622	11.9706	22.5017	12.3163	13.1778	13.451	18.941	12.5491	13.073	13.1615	20.7487
+	8.7233	3.05095	K[54.0106]PQDETK[54.0106]ESTSC[130.0791]PVVQK	sp|Q9H8H0|NOL11_HUMAN	12C(130.0791),1K(54.0106),7K(54.0106)	Q9H8H0	NOL11_HUMAN	NOL11	Nucleolar protein 11	GO:0006139;GO:0006355;GO:0006356;GO:0006364;GO:0006396;GO:0006725;GO:0006807;GO:0008152;GO:0009889;GO:0009891;GO:0009893;GO:0009987;GO:0010468;GO:0010556;GO:0010557;GO:0010604;GO:0016070;GO:0016072;GO:0019219;GO:0019222;GO:0030490;GO:0031323;GO:0031325;GO:0031326;GO:0031328;GO:0034470;GO:0034641;GO:0034660;GO:0043170;GO:0044237;GO:0044238;GO:0045893;GO:0045935;GO:0045943;GO:0046483;GO:0048518;GO:…	GO:0003676;GO:0003723;GO:0005488;GO:0097159	GO:0005654;GO:0005730;GO:0032991;GO:0034455;GO:0043226;GO:0043228;GO:0043229;GO:0043232;GO:0110165;GO:0140513	567	583	13.6609	12.6903	20.4707	13.142	12.7425	13.0934	13.1264	13.0364	14.1399	13.6134	13.6841	12.7599	12.6019	12.2739	12.5892	13.6626	12.7004	12.0179	11.4251	13.7719	12.4249	13.5586	12.8048	12.734	20.3906	12.1206	13.2059	12.1988	20.7628	13.1053	13.4211	12.1103	11.6933	10.9339	14.3022
+	14.4362	2.94679	M[15.9949]FC[125.0477]VTPPELETK[54.0106]	sp|O60256|KPRB_HUMAN	12K(54.0106),1M(15.9949),3C(125.0477)	O60256	KPRB_HUMAN	PRPSAP2	Phosphoribosyl pyrophosphate synthase-associated protein 2	GO:0006015;GO:0006139;GO:0006163;GO:0006164;GO:0006725;GO:0006753;GO:0006793;GO:0006796;GO:0006807;GO:0008152;GO:0009058;GO:0009117;GO:0009165;GO:0009987;GO:0018130;GO:0019438;GO:0019637;GO:0019693;GO:0032502;GO:0034641;GO:0034654;GO:0044237;GO:0044238;GO:0044249;GO:0044271;GO:0044281;GO:0046390;GO:0046391;GO:0046483;GO:0048513;GO:0048856;GO:0055086;GO:0060348;GO:0071704;GO:0072521;GO:0072522;GO:…	GO:0000166;GO:0000287;GO:0003824;GO:0004749;GO:0004857;GO:0005488;GO:0005515;GO:0005524;GO:0016740;GO:0016772;GO:0016778;GO:0017076;GO:0030234;GO:0030554;GO:0032553;GO:0032555;GO:0032559;GO:0035639;GO:0036094;GO:0042802;GO:0043167;GO:0043168;GO:0043169;GO:0046872;GO:0097159;GO:0097367;GO:0098772;GO:0140678;GO:1901265;GO:1901363	GO:0002189;GO:0005737;GO:0032991;GO:0061695;GO:0110165;GO:1902494;GO:1990234	1	12	16.4444	17.0225	15.6568	14.0155	19.0544	15.5072	16.6097	13.3337	19.1467	13.4631	17.3977	12.6783	12.7566	12.4691	17.2143	11.3742	12.939	11.9012	17.9237	20.0165	18.2453	13.1711	17.9028	12.3372	15.0864	12.477	16.9604	16.6198	16.8872	14.0361	16.9069	12.8715	19.2414	12.6698	17.8861
+	7.08816	2.92222	TK[54.0106]ADINATKVK[54.0106]	sp|Q86X02|CDR2L_HUMAN	11K(54.0106),2K(54.0106)	Q86X02	CDR2L_HUMAN	CDR2L	Cerebellar degeneration-related protein 2-like	GO:0006810;GO:0007017;GO:0007018;GO:0009987;GO:0010970;GO:0030705;GO:0046907;GO:0047496;GO:0051179;GO:0051234;GO:0051640;GO:0051641;GO:0051648;GO:0051649;GO:0051650;GO:0051656;GO:0055107;GO:0072384;GO:0099111;GO:0099518	GO:0005488;GO:0005515;GO:0042802	GO:0005737;GO:0110165	450	460	22.0183	22.3737	21.7179	21.285	23.6357	22.3361	23.285	21.7574	24.0251	21.7081	23.0547	21.3882	12.3256	19.2083	22.6681	11.7382	21.6534	11.8004	22.3228	24.5416	23.5353	22.5604	21.9453	22.2592	21.6519	17.9056	20.7077	22.0043	22.2071	21.461	21.4965	20.6239	23.6899	19.7098	22.3351
+	7.66954	2.88149	VSSK[54.0106]C[125.0477]GSKANIK	sp|P27816|MAP4_HUMAN	4K(54.0106),5C(125.0477)	P27816	MAP4_HUMAN	MAP4	Microtubule-associated protein 4	GO:0000226;GO:0006996;GO:0007010;GO:0007017;GO:0007018;GO:0007051;GO:0007052;GO:0009987;GO:0010639;GO:0016043;GO:0022402;GO:0022411;GO:0022607;GO:0030030;GO:0031109;GO:0031175;GO:0031344;GO:0031345;GO:0033043;GO:0043933;GO:0044087;GO:0044782;GO:0046785;GO:0048519;GO:0048523;GO:0050789;GO:0050794;GO:0051012;GO:0051128;GO:0051129;GO:0051179;GO:0051234;GO:0051258;GO:0051293;GO:0051294;GO:0051301;GO:…	GO:0003676;GO:0003723;GO:0005198;GO:0005488;GO:0005515;GO:0008017;GO:0008092;GO:0015631;GO:0097159;GO:0140777;GO:0140778	GO:0005815;GO:0005819;GO:0005829;GO:0005856;GO:0005874;GO:0005875;GO:0005886;GO:0005930;GO:0015630;GO:0016020;GO:0030424;GO:0032991;GO:0042995;GO:0043005;GO:0043226;GO:0043228;GO:0043229;GO:0043232;GO:0072686;GO:0099080;GO:0099081;GO:0099512;GO:0099513;GO:0110165;GO:0120025	1035	1046	13.5971	13.5139	13.2713	13.0464	13.9093	13.8784	14.1596	12.4112	12.8006	13.381	13.1749	13.8675	12.3784	13.1579	21.4162	11.1094	13.5199	12.4806	21.6046	14.1065	12.5345	14.154	12.9807	12.9311	12.5608	12.6093	13.5809	12.3138	21.0284	11.6428	12.8558	12.2665	12.9683	11.9863	12.891
+	13.9916	2.87057	STLAEIEDWLDK[54.0106]	sp|Q9NZM1|MYOF_HUMAN	12K(54.0106)	Q9NZM1	MYOF_HUMAN	MYOF	Myoferlin	GO:0001778;GO:0003008;GO:0003012;GO:0003013;GO:0006936;GO:0007009;GO:0008015;GO:0009987;GO:0010646;GO:0016043;GO:0023051;GO:0032501;GO:0032879;GO:0046928;GO:0050789;GO:0050794;GO:0050804;GO:0051046;GO:0051049;GO:0051588;GO:0061024;GO:0065007;GO:0071840;GO:0099177;GO:1903530	GO:0005488;GO:0005509;GO:0005543;GO:0008289;GO:0043167;GO:0043169;GO:0046872	GO:0005635;GO:0005886;GO:0005901;GO:0012506;GO:0016020;GO:0030658;GO:0030659;GO:0030672;GO:0031090;GO:0031410;GO:0031965;GO:0031967;GO:0031975;GO:0031982;GO:0034451;GO:0043226;GO:0043227;GO:0043229;GO:0043230;GO:0043231;GO:0044853;GO:0045121;GO:0065010;GO:0070062;GO:0097708;GO:0098588;GO:0098590;GO:0098857;GO:0099501;GO:0110165;GO:1903561	749	760	16.905	17.0815	16.8408	17.6027	19.2301	15.9631	17.5634	15.3258	18.8872	15.6158	18.2974	13.1645	13.0735	13.1663	17.518	11.8909	15.9108	11.1527	18.2414	19.8478	18.1699	15.9379	17.9376	17.5235	16.3471	12.2638	17.4445	17.5229	16.0298	16.0178	16.8368	12.4096	19.4403	13.3254	17.6057
+	6.03936	2.69021	VTGVYELSLC[125.0477]HVADAGSPGMQR[54.0106]	sp|Q12756|KIF1A_HUMAN	10C(125.0477),22R(54.0106)	Q12756	KIF1A_HUMAN	KIF1A	Kinesin-like protein KIF1A	GO:0006810;GO:0007017;GO:0007018;GO:0008088;GO:0008089;GO:0008090;GO:0009987;GO:0010970;GO:0010975;GO:0016192;GO:0016482;GO:0022603;GO:0030705;GO:0031344;GO:0032252;GO:0032253;GO:0046907;GO:0047496;GO:0050789;GO:0050793;GO:0050794;GO:0050807;GO:0051128;GO:0051179;GO:0051234;GO:0051640;GO:0051641;GO:0051648;GO:0051649;GO:0051650;GO:0051656;GO:0060998;GO:0061001;GO:0065007;GO:0072384;GO:0098930;GO:…	GO:0000166;GO:0003774;GO:0003777;GO:0003824;GO:0005488;GO:0005515;GO:0005524;GO:0008017;GO:0008092;GO:0008574;GO:0015631;GO:0016462;GO:0016787;GO:0016817;GO:0016818;GO:0016887;GO:0017076;GO:0017111;GO:0030554;GO:0032553;GO:0032555;GO:0032559;GO:0035639;GO:0036094;GO:0042802;GO:0043167;GO:0043168;GO:0097159;GO:0097367;GO:0140657;GO:1901265;GO:1901363	GO:0005737;GO:0005871;GO:0005874;GO:0005875;GO:0012506;GO:0016020;GO:0030054;GO:0030141;GO:0030424;GO:0030425;GO:0030659;GO:0030667;GO:0031045;GO:0031090;GO:0031410;GO:0031982;GO:0032127;GO:0032838;GO:0032991;GO:0042995;GO:0043005;GO:0043226;GO:0043227;GO:0043229;GO:0043231;GO:0045202;GO:0048471;GO:0097708;GO:0098588;GO:0098992;GO:0099012;GO:0099080;GO:0099081;GO:0099503;GO:0099512;GO:0099513;GO:…	1321	1342	19.4847	12.696	19.3153	19.173	20.6569	19.3578	20.0959	19.3728	20.717	18.4732	20.0666	16.4542	13.2227	12.6845	20.1511	13.0432	18.6069	12.9598	20.3788	21.4193	10.9454	19.362	14.0885	19.7926	19.1054	12.665	20.1977	12.7037	19.9803	18.8551	12.7667	12.3859	12.7494	12.5251	13.2241
+	6.10619	2.68166	LIDFLQAKMDQPAK[54.0106]KK	sp|O14578|CTRO_HUMAN	14K(54.0106)	O14578	CTRO_HUMAN	CIT	Citron Rho-interacting kinase	GO:0000278;GO:0000281;GO:0000910;GO:0006793;GO:0006796;GO:0006915;GO:0007049;GO:0008152;GO:0008219;GO:0009966;GO:0009968;GO:0009987;GO:0010564;GO:0010646;GO:0010648;GO:0012501;GO:0016310;GO:0022008;GO:0022402;GO:0023051;GO:0023057;GO:0030154;GO:0032465;GO:0032467;GO:0032502;GO:0035330;GO:0035331;GO:0044237;GO:0045787;GO:0048518;GO:0048519;GO:0048522;GO:0048523;GO:0048583;GO:0048585;GO:0048699;GO:…	GO:0000166;GO:0001221;GO:0001223;GO:0003824;GO:0004672;GO:0004674;GO:0004857;GO:0004860;GO:0005488;GO:0005515;GO:0005524;GO:0008134;GO:0016301;GO:0016740;GO:0016772;GO:0016773;GO:0017076;GO:0017124;GO:0019207;GO:0019210;GO:0019887;GO:0019899;GO:0019900;GO:0019901;GO:0019904;GO:0030165;GO:0030234;GO:0030291;GO:0030554;GO:0032553;GO:0032555;GO:0032559;GO:0035639;GO:0036094;GO:0043167;GO:0043168;GO:…	GO:0005829;GO:0016020;GO:0110165	1222	1237	16.2083	23.2466	15.7834	12.6371	23.6708	14.9195	22.955	12.5913	24.1908	12.1923	16.5779	12.5802	11.4327	12.367	23.389	12.8508	12.3932	12.0808	23.0449	23.6912	12.3639	13.1855	17.0888	11.9703	12.5655	11.6462	22.3136	12.9492	12.9435	13.0388	12.5522	12.9676	18.4138	13.0417	17.9234
+	3.5263	2.66681	KFHIGC[130.0791]EK[54.0106]GGANLIK	sp|Q93008|USP9X_HUMAN	6C(130.0791),8K(54.0106)	Q93008	USP9X_HUMAN	USP9X	Probable ubiquitin carboxyl-terminal hydrolase FAF-X	GO:0000122;GO:0001764;GO:0001881;GO:0006355;GO:0006357;GO:0006807;GO:0007059;GO:0007165;GO:0007166;GO:0007167;GO:0007178;GO:0007179;GO:0007276;GO:0007292;GO:0008104;GO:0008152;GO:0009889;GO:0009890;GO:0009892;GO:0009893;GO:0009894;GO:0009895;GO:0009966;GO:0009967;GO:0009987;GO:0010468;GO:0010556;GO:0010558;GO:0010604;GO:0010605;GO:0010646;GO:0010647;GO:0016043;GO:0016049;GO:0016477;GO:0016562;GO:…	GO:0003824;GO:0004175;GO:0004197;GO:0004843;GO:0005488;GO:0005515;GO:0008233;GO:0008234;GO:0016787;GO:0019783;GO:0046332;GO:0061578;GO:0070410;GO:0101005;GO:0140096;GO:1990380	GO:0005634;GO:0005737;GO:0005829;GO:0005856;GO:0005929;GO:0016020;GO:0030426;GO:0030427;GO:0042995;GO:0043226;GO:0043227;GO:0043228;GO:0043229;GO:0043231;GO:0043232;GO:0110165;GO:0120025	1446	1460	21.8606	21.9408	13.2285	13.7907	22.6955	12.7798	22.6939	12.6815	21.82	12.483	22.0659	12.3055	21.9515	12.8268	22.2985	21.0759	21.1385	11.2499	22.2789	23.2575	12.8235	13.7519	13.2381	12.9446	21.89	12.2003	21.9353	12.9935	22.2056	22.574	12.5189	20.3534	22.3918	12.1515	12.327
+	5.21411	2.65869	YK[54.0106]MHLYGLHEGQR[54.0106]	sp|P22105|TENX_HUMAN	13R(54.0106),2K(54.0106)	P22105	TENX_HUMAN	TNXB	Tenascin-X	GO:0001817;GO:0001819;GO:0006082;GO:0006629;GO:0006631;GO:0006638;GO:0006639;GO:0006641;GO:0006996;GO:0007010;GO:0007155;GO:0007160;GO:0008152;GO:0008284;GO:0009889;GO:0009891;GO:0009893;GO:0009966;GO:0009967;GO:0009987;GO:0010468;GO:0010556;GO:0010557;GO:0010604;GO:0010628;GO:0010646;GO:0010647;GO:0010717;GO:0010718;GO:0016043;GO:0017015;GO:0019222;GO:0019752;GO:0022607;GO:0023051;GO:0023056;GO:…	GO:0005102;GO:0005178;GO:0005198;GO:0005201;GO:0005488;GO:0005515;GO:0005518;GO:0005539;GO:0008201;GO:0044877;GO:0050839;GO:0097367;GO:0098633;GO:1901681	GO:0005576;GO:0005615;GO:0030312;GO:0031012;GO:0031982;GO:0032991;GO:0043226;GO:0043227;GO:0043229;GO:0043230;GO:0043231;GO:0062023;GO:0065010;GO:0070062;GO:0090733;GO:0098636;GO:0098637;GO:0110165;GO:1903561	1436	1448	13.4635	20.8054	12.4799	19.4977	21.3405	20.0648	21.028	13.033	13.5777	19.4908	20.7978	13.5279	12.5264	12.6371	21.0632	12.3315	19.4588	11.517	21.0217	22.2321	12.0664	19.7887	21.0744	20.498	20.0988	11.5392	21.1146	12.4416	20.8826	20.1751	12.4605	12.4246	21.0771	12.6979	20.4939
+	9.75412	2.6524	VQTTPSKPGGDR[54.0106]	sp|Q12834|CDC20_HUMAN	12R(54.0106)	Q12834	CDC20_HUMAN	CDC20	Cell division cycle protein 20 homolog	GO:0000075;GO:0000226;GO:0006508;GO:0006511;GO:0006807;GO:0006996;GO:0007010;GO:0007017;GO:0007051;GO:0007052;GO:0007062;GO:0007064;GO:0007088;GO:0007093;GO:0007094;GO:0007165;GO:0007346;GO:0007399;GO:0008152;GO:0009056;GO:0009057;GO:0009893;GO:0009894;GO:0009896;GO:0009987;GO:0010498;GO:0010564;GO:0010604;GO:0010638;GO:0010639;GO:0010646;GO:0010948;GO:0010965;GO:0016043;GO:0016567;GO:0019222;GO:…	GO:0005488;GO:0008047;GO:0010997;GO:0030234;GO:0044877;GO:0055106;GO:0097027;GO:0098772;GO:0140677;GO:1990757	GO:0000151;GO:0000152;GO:0000776;GO:0000922;GO:0005654;GO:0005680;GO:0005813;GO:0005815;GO:0005819;GO:0005829;GO:0031461;GO:0032991;GO:0033597;GO:0043226;GO:0043228;GO:0043229;GO:0043232;GO:0099080;GO:0110165;GO:0140513;GO:0140535;GO:1902494;GO:1990234	67	78	12.8818	18.0885	17.636	12.7826	19.148	12.658	13.4137	12.7558	19.366	12.4796	12.7433	12.4575	14.1448	12.5929	13.0304	11.4359	12.2745	11.8068	12.5905	20.2897	12.5032	13.3065	14.0279	11.8632	17.9389	12.5019	13.2361	13.2415	18.2174	13.3624	13.2171	13.2803	13.2322	12.9056	13.2791
+	13.022	2.61362	GR[54.0106]SPMLNHLK	sp|A8TX70|CO6A5_HUMAN	2R(54.0106)	A8TX70	CO6A5_HUMAN	COL6A5	Collagen alpha-5(VI) chain	GO:0007155;GO:0009987	GO:0005198;GO:0005201;GO:0030020	GO:0005576;GO:0005581;GO:0030312;GO:0031012;GO:0032991;GO:0062023;GO:0110165	89	98	18.7698	15.5537	18.767	18.7388	18.5138	17.1393	19.287	12.6847	17.8528	16.6641	19.0622	12.18	15.6617	16.4859	16.8702	16.197	17.1388	15.6704	16.4086	13.3557	11.7259	16.2054	18.733	17.0178	16.9262	15.4361	17.197	12.3341	18.564	13.9641	18.8671	13.2143	17.2972	12.5776	18.3973
+	5.77907	2.56936	TRSQM[15.9949]PYK[54.0106]VFHYQVK	sp|P06858|LIPL_HUMAN	5M(15.9949),8K(54.0106)	P06858	LIPL_HUMAN	LPL	Lipoprotein lipase	GO:0001817;GO:0001819;GO:0006082;GO:0006629;GO:0006631;GO:0006633;GO:0006638;GO:0006639;GO:0006641;GO:0006644;GO:0006793;GO:0006796;GO:0007154;GO:0007165;GO:0007584;GO:0008152;GO:0008610;GO:0009056;GO:0009058;GO:0009605;GO:0009607;GO:0009617;GO:0009743;GO:0009746;GO:0009749;GO:0009889;GO:0009891;GO:0009893;GO:0009987;GO:0009991;GO:0010033;GO:0010468;GO:0010556;GO:0010557;GO:0010604;GO:0010628;GO:…	GO:0003824;GO:0004465;GO:0004620;GO:0004806;GO:0005102;GO:0005488;GO:0005509;GO:0005515;GO:0005539;GO:0008201;GO:0008970;GO:0016298;GO:0016787;GO:0016788;GO:0030674;GO:0034185;GO:0042802;GO:0042803;GO:0043167;GO:0043169;GO:0043394;GO:0043395;GO:0043495;GO:0044877;GO:0046872;GO:0046983;GO:0052689;GO:0052739;GO:0052740;GO:0060090;GO:0071813;GO:0071814;GO:0097367;GO:1901681	GO:0005576;GO:0005615;GO:0005886;GO:0009986;GO:0016020;GO:0032991;GO:0032994;GO:0034358;GO:0034361;GO:0034385;GO:0042627;GO:0110165;GO:1902494;GO:1990777	332	346	12.8416	20.833	12.3752	13.2354	20.6986	20.1221	20.2048	13.428	21.4216	13.5294	20.1718	12.6245	13.4607	12.5041	21.5084	11.8184	12.1969	12.3385	21.5469	20.8436	12.7405	14.5344	14.2389	14.0263	19.8883	12.1048	19.3642	12.9536	20.3192	13.3188	13.6037	12.7842	20.8887	12.5191	12.5648
+	5.09177	2.54608	ER[54.0106]LDDLC[125.0477]TRLQM[15.9949]TSTK	sp|Q6NXT1|ANR54_HUMAN	12M(15.9949),2R(54.0106),7C(125.0477)	Q6NXT1	ANR54_HUMAN	ANKRD54	Ankyrin repeat domain-containing protein 54	GO:0002682;GO:0006810;GO:0006913;GO:0009966;GO:0009987;GO:0010646;GO:0023051;GO:0045595;GO:0045597;GO:0045637;GO:0045639;GO:0045646;GO:0045648;GO:0046907;GO:0048518;GO:0048522;GO:0048583;GO:0050789;GO:0050793;GO:0050794;GO:0051094;GO:0051169;GO:0051179;GO:0051234;GO:0051239;GO:0051641;GO:0051649;GO:0060284;GO:0065007;GO:1902531;GO:1903706;GO:2000026	GO:0005488;GO:0019207;GO:0019887;GO:0030234;GO:0044877;GO:0098772	GO:0005634;GO:0005737;GO:0030496;GO:0043226;GO:0043227;GO:0043229;GO:0043231;GO:0110165	259	274	12.7307	13.3108	19.2601	12.4875	12.8267	13.1325	12.1046	12.5207	14.337	13.2099	18.7236	12.3254	18.3856	12.5722	17.5119	17.2526	12.9734	11.9898	15.3592	14.7736	13.0668	13.9505	12.2844	17.4849	20.1609	11.8374	18.4722	12.4886	20.7503	20.0675	20.757	17.2625	16.5513	15.9849	13.819
+	7.74949	2.54352	ICGVEDAVSEMTRR[54.0106]AM[15.9949]GGAVPFK[54.0106]	sp|P78330|SERB_HUMAN	14R(54.0106),16M(15.9949),23K(54.0106)	P78330	SERB_HUMAN	PSPH	Phosphoserine phosphatase	GO:0001701;GO:0006082;GO:0006520;GO:0006563;GO:0006564;GO:0006793;GO:0006796;GO:0006807;GO:0007275;GO:0008152;GO:0008652;GO:0009058;GO:0009069;GO:0009070;GO:0009605;GO:0009612;GO:0009628;GO:0009790;GO:0009792;GO:0009987;GO:0009991;GO:0010033;GO:0014070;GO:0016053;GO:0016311;GO:0019752;GO:0031667;GO:0032501;GO:0032502;GO:0033574;GO:0033993;GO:0042221;GO:0043009;GO:0043436;GO:0044237;GO:0044238;GO:…	GO:0000287;GO:0003824;GO:0005488;GO:0005515;GO:0016787;GO:0016788;GO:0016791;GO:0036424;GO:0042578;GO:0042802;GO:0042803;GO:0043167;GO:0043169;GO:0046872;GO:0046983	GO:0005737;GO:0005829;GO:0110165	37	59	13.0444	13.7143	18.8458	12.8816	12.7671	13.3778	15.1537	12.6151	12.6827	12.8341	13.2119	13.5184	13.0996	13.2987	12.7204	11.989	11.5125	12.6516	12.977	14.0346	11.4614	13.7408	13.1295	13.4521	20.8658	12.7438	13.1596	12.8579	20.4724	13.2244	11.9665	13.0953	13.7979	13.1913	14.0316
+	4.76323	2.53369	IK[54.0106]TLGTGSFGRVMLVK[54.0106]	sp|P17612|KAPCA_HUMAN	16K(54.0106),2K(54.0106)	P17612	KAPCA_HUMAN	PRKACA	cAMP-dependent protein kinase catalytic subunit alpha	GO:0001678;GO:0001704;GO:0001707;GO:0001843;GO:0002027;GO:0002791;GO:0002793;GO:0003006;GO:0003008;GO:0003014;GO:0003091;GO:0006109;GO:0006110;GO:0006111;GO:0006139;GO:0006140;GO:0006396;GO:0006397;GO:0006468;GO:0006611;GO:0006725;GO:0006793;GO:0006796;GO:0006807;GO:0006810;GO:0006873;GO:0006874;GO:0006886;GO:0006913;GO:0006937;GO:0006942;GO:0006950;GO:0007154;GO:0007165;GO:0007166;GO:0007186;GO:…	GO:0000166;GO:0000287;GO:0003824;GO:0004672;GO:0004674;GO:0004679;GO:0004690;GO:0004691;GO:0004712;GO:0005488;GO:0005515;GO:0005524;GO:0016301;GO:0016740;GO:0016772;GO:0016773;GO:0017076;GO:0019899;GO:0019900;GO:0019901;GO:0019904;GO:0030145;GO:0030554;GO:0031625;GO:0032553;GO:0032555;GO:0032559;GO:0034237;GO:0035639;GO:0036094;GO:0043167;GO:0043168;GO:0043169;GO:0044389;GO:0046872;GO:0046914;GO:…	GO:0001669;GO:0005634;GO:0005654;GO:0005737;GO:0005739;GO:0005813;GO:0005815;GO:0005829;GO:0005886;GO:0005929;GO:0005952;GO:0016020;GO:0016604;GO:0016607;GO:0030054;GO:0030141;GO:0031410;GO:0031514;GO:0031588;GO:0031594;GO:0031982;GO:0032991;GO:0034702;GO:0034703;GO:0034704;GO:0036126;GO:0042995;GO:0043005;GO:0043197;GO:0043226;GO:0043227;GO:0043229;GO:0043230;GO:0043231;GO:0044309;GO:0044853;GO:…	47	62	12.9876	13.7295	11.9493	11.7795	22.1802	13.5564	20.9053	12.9992	13.5477	13.0462	12.7302	12.3658	13.2691	13.4039	21.4786	12.7779	12.7949	12.5356	21.4694	22.0738	12.4103	13.7674	12.5204	12.709	12.1127	12.7052	18.5702	12.2009	12.2402	12.7883	13.3244	13.0522	12.8052	12.0473	14.06
+	10.5048	2.53362	AIDKNFDSDISSVGIDGCWQADSQR[54.0106]	sp|Q9H871|RMD5A_HUMAN	25R(54.0106)	Q9H871	RMD5A_HUMAN	RMND5A	E3 ubiquitin-protein transferase RMND5A	GO:0000209;GO:0006508;GO:0006511;GO:0006807;GO:0008152;GO:0009056;GO:0009057;GO:0010498;GO:0016567;GO:0019538;GO:0019941;GO:0030163;GO:0032446;GO:0036211;GO:0043161;GO:0043170;GO:0043412;GO:0043632;GO:0043687;GO:0044238;GO:0051603;GO:0070647;GO:0071704;GO:1901564;GO:1901565;GO:1901575	GO:0003824;GO:0004842;GO:0005488;GO:0016740;GO:0016746;GO:0016755;GO:0019787;GO:0043167;GO:0043169;GO:0046872;GO:0061630;GO:0061659;GO:0140096	GO:0000151;GO:0005634;GO:0005654;GO:0005737;GO:0032991;GO:0034657;GO:0043226;GO:0043227;GO:0043229;GO:0043231;GO:0110165;GO:0140535;GO:1902494;GO:1990234	92	116	17.7132	13.0662	16.7373	11.8053	13.8134	12.5516	14.575	12.7604	13.2247	13.323	12.8879	12.7104	12.3504	12.2918	16.8617	12.7522	17.4647	11.8693	13.3306	12.8838	12.4832	13.5573	19.295	12.4845	12.6027	12.7626	12.4927	17.2027	12.2588	13.3898	18.2632	12.7319	19.0747	11.659	18.531
+	8.94352	2.52209	EC[130.0791]HKVTKTDGCTGK[54.0106]	sp|Q6ZNB6|NFXL1_HUMAN	14K(54.0106),2C(130.0791)	Q6ZNB6	NFXL1_HUMAN	NFXL1	NF-X1-type zinc finger protein NFXL1	GO:0006355;GO:0009889;GO:0010468;GO:0010556;GO:0019219;GO:0019222;GO:0031323;GO:0031326;GO:0050789;GO:0050794;GO:0051171;GO:0051252;GO:0060255;GO:0065007;GO:0080090;GO:2001141	GO:0000976;GO:0000977;GO:0000981;GO:0001067;GO:0003676;GO:0003677;GO:0003690;GO:0003700;GO:0005488;GO:0008270;GO:0043167;GO:0043169;GO:0043565;GO:0046872;GO:0046914;GO:0097159;GO:0140110;GO:1990837	GO:0000785;GO:0005634;GO:0016020;GO:0032991;GO:0032993;GO:0043226;GO:0043227;GO:0043229;GO:0043231;GO:0110165	678	691	18.5145	14.3771	17.923	13.0646	14.1974	13.5649	18.7407	12.7876	18.8046	13.2517	18.4209	12.947	13.2537	12.3502	18.0053	11.2689	13.1179	12.5174	18.2039	17.5108	11.9445	13.5586	12.941	17.81	17.9057	12.9071	18.234	12.6243	18.2869	18.5375	17.5607	11.8461	17.2193	13.8929	13.0166
+	6.97542	2.51531	K[54.0106]LASDAGIFFTR	sp|Q9NR46|SHLB2_HUMAN	1K(54.0106)	Q9NR46	SHLB2_HUMAN	SH3GLB2	Endophilin-B2	GO:0009987;GO:0016043;GO:0061024;GO:0071840	GO:0005488;GO:0005515;GO:0042802;GO:0045296;GO:0050839	GO:0005654;GO:0005737;GO:0005829;GO:0016020;GO:0110165	7	18	15.3274	15.7452	15.6158	15.0452	17.4443	16.9604	18.465	12.5242	17.0286	14.2156	17.977	12.8488	16.3129	20.4751	17.9373	17.6168	20.5001	16.1142	20.2071	17.48	12.6415	14.7743	19.4882	18.4106	20.447	12.9094	18.9102	21.5135	20.0623	18.2224	20.326	18.5264	20.2781	14.2282	13.2749
+	9.14597	2.50426	KYFAATQFEPLAAR[54.0106]	sp|Q9UIQ6|LCAP_HUMAN	14R(54.0106)	Q9UIQ6	LCAP_HUMAN	LNPEP	Leucyl-cystinyl aminopeptidase	GO:0002376;GO:0002474;GO:0002478;GO:0002480;GO:0006508;GO:0006518;GO:0006807;GO:0007154;GO:0007165;GO:0007267;GO:0007565;GO:0008152;GO:0008217;GO:0009056;GO:0009057;GO:0009892;GO:0009987;GO:0019222;GO:0019538;GO:0019882;GO:0019884;GO:0022414;GO:0023052;GO:0030163;GO:0032501;GO:0035556;GO:0042590;GO:0043170;GO:0043171;GO:0043603;GO:0044237;GO:0044238;GO:0044248;GO:0044703;GO:0044706;GO:0048002;GO:…	GO:0003824;GO:0004177;GO:0005488;GO:0008233;GO:0008235;GO:0008237;GO:0008238;GO:0008270;GO:0016787;GO:0033218;GO:0042277;GO:0043167;GO:0043169;GO:0046872;GO:0046914;GO:0070006;GO:0140096	GO:0005576;GO:0005737;GO:0005765;GO:0005774;GO:0005829;GO:0005886;GO:0012506;GO:0016020;GO:0030659;GO:0031090;GO:0031904;GO:0031905;GO:0031974;GO:0043233;GO:0048471;GO:0070013;GO:0098588;GO:0098852;GO:0110165	287	300	13.7765	13.4679	16.6722	12.6793	13.6077	13.1357	15.3453	12.6997	12.677	12.7323	14.3288	12.1747	13.2983	12.3755	14.828	12.9123	15.7584	12.3104	12.4385	14.1165	11.9382	13.7709	19.0044	11.99	17.0155	12.9239	15.5168	17.3782	18.3953	12.5663	18.5968	12.1722	12.1247	12.5902	19.5351
+	9.94752	2.48354	R[54.0106]CLQLEPYNEVC[130.0791]QYM[15.9949]K	sp|Q8NBP0|TTC13_HUMAN	12C(130.0791),15M(15.9949),1R(54.0106)	Q8NBP0	TTC13_HUMAN	TTC13	Tetratricopeptide repeat protein 13				376	391	12.3401	14.3073	13.1007	13.0535	14.0758	12.2564	17.2837	12.8839	14.413	13.3211	13.7027	12.6968	12.8007	12.4609	17.8904	13.1583	12.827	12.5963	17.9559	15.3386	11.8935	13.1568	13.6798	12.5768	12.2705	13.1313	16.9715	12.2563	18.9991	13.1663	13.2085	13.0187	17.7098	11.588	13.0945
+	8.81014	2.44398	M[15.9949]VK[54.0106]HREPFHK[54.0106]	sp|Q15031|SYLM_HUMAN	10K(54.0106),1M(15.9949),3K(54.0106)	Q15031	SYLM_HUMAN	LARS2	Leucine--tRNA ligase, mitochondrial	GO:0006082;GO:0006139;GO:0006399;GO:0006412;GO:0006418;GO:0006429;GO:0006518;GO:0006520;GO:0006725;GO:0006807;GO:0008152;GO:0009058;GO:0009059;GO:0009987;GO:0016070;GO:0019538;GO:0019752;GO:0032543;GO:0034641;GO:0034660;GO:0043038;GO:0043039;GO:0043043;GO:0043170;GO:0043436;GO:0043603;GO:0043604;GO:0044237;GO:0044238;GO:0044249;GO:0044271;GO:0044281;GO:0046483;GO:0071704;GO:0090304;GO:1901360;GO:…	GO:0000166;GO:0002161;GO:0003824;GO:0004812;GO:0004823;GO:0005488;GO:0005524;GO:0016787;GO:0016788;GO:0016874;GO:0016875;GO:0017076;GO:0030554;GO:0032553;GO:0032555;GO:0032559;GO:0035639;GO:0036094;GO:0043167;GO:0043168;GO:0052689;GO:0097159;GO:0097367;GO:0140098;GO:0140101;GO:0140640;GO:1901265;GO:1901363	GO:0005739;GO:0005759;GO:0031974;GO:0043226;GO:0043227;GO:0043229;GO:0043231;GO:0043233;GO:0070013;GO:0110165	583	592	12.9635	13.4668	16.4675	12.7657	12.9529	12.269	14.2783	11.6892	12.6598	12.4494	16.7976	14.4355	13.1326	11.8484	13.2855	11.8214	12.2987	12.4242	12.1291	14.3259	11.6953	14.8867	12.7714	13.8355	18.0176	11.5577	15.6631	12.8854	18.265	17.7555	18.2879	12.9417	13.1483	12.8809	13.1267
+	6.57785	2.43401	KLHLYEQGGR[54.0106]	sp|Q9NPG3|UBN1_HUMAN	10R(54.0106)	Q9NPG3	UBN1_HUMAN	UBN1	Ubinuclein-1	GO:0006325;GO:0006334;GO:0006338;GO:0009987;GO:0016043;GO:0022607;GO:0034728;GO:0043933;GO:0065003;GO:0065004;GO:0071824;GO:0071840	GO:0003676;GO:0003677;GO:0005488;GO:0097159	GO:0005634;GO:0005654;GO:0005911;GO:0005923;GO:0016604;GO:0016605;GO:0030054;GO:0034451;GO:0043226;GO:0043227;GO:0043229;GO:0043231;GO:0070160;GO:0070161;GO:0110165	431	440	19.6359	12.5525	19.6581	19.1846	20.8213	16.2003	20.2701	19.419	18.9848	18.7543	16.7637	12.0697	12.3007	12.613	20.0821	12.1187	18.8324	12.0153	20.3312	20.2031	12.7303	14.0721	19.6131	19.7958	19.186	12.5191	18.4736	13.3376	19.9406	19.3396	19.5281	13.9301	17.2812	12.9554	19.8638
+	11.1842	2.41666	VKEMKR[54.0106]MHK	sp|Q99459|CDC5L_HUMAN	6R(54.0106)	Q99459	CDC5L_HUMAN	CDC5L	Cell division cycle 5-like protein	GO:0000075;GO:0000077;GO:0000375;GO:0000377;GO:0000398;GO:0006139;GO:0006259;GO:0006281;GO:0006355;GO:0006357;GO:0006396;GO:0006397;GO:0006725;GO:0006807;GO:0006950;GO:0006974;GO:0007049;GO:0007165;GO:0008152;GO:0008380;GO:0009889;GO:0009891;GO:0009893;GO:0009987;GO:0010468;GO:0010556;GO:0010557;GO:0010564;GO:0010604;GO:0010948;GO:0016070;GO:0016071;GO:0019219;GO:0019222;GO:0031323;GO:0031325;GO:…	GO:0000976;GO:0000977;GO:0000981;GO:0001067;GO:0001216;GO:0001228;GO:0003676;GO:0003677;GO:0003690;GO:0003700;GO:0003723;GO:0005488;GO:0005515;GO:0019904;GO:0042802;GO:0043565;GO:0071987;GO:0097159;GO:0140110;GO:1990837	GO:0000974;GO:0005634;GO:0005654;GO:0005681;GO:0005684;GO:0005737;GO:0016020;GO:0016604;GO:0016607;GO:0032991;GO:0043226;GO:0043227;GO:0043229;GO:0043231;GO:0071007;GO:0071013;GO:0110165;GO:0140513;GO:1902494;GO:1990904	531	539	14.4347	12.69	19.6073	13.3488	13.5539	12.5651	12.8109	13.3277	14.1152	12.5781	15.157	12.9884	13.9792	12.5867	12.6721	12.8978	13.0277	11.8277	12.3192	15.3153	11.8416	13.0282	14.0819	12.6832	20.1952	12.2435	13.7507	12.1382	18.6812	17.5632	16.4148	12.2251	13.2386	13.0918	13.0133
+	10.7299	2.41601	AVAGNISDPGLQK[54.0106]	sp|P18206|VINC_HUMAN	13K(54.0106)	P18206	VINC_HUMAN	VCL	Vinculin	GO:0001894;GO:0001952;GO:0002009;GO:0007043;GO:0007155;GO:0007160;GO:0008104;GO:0009653;GO:0009987;GO:0010810;GO:0016043;GO:0016049;GO:0022607;GO:0030030;GO:0030031;GO:0030032;GO:0030155;GO:0030334;GO:0030336;GO:0030856;GO:0031589;GO:0032501;GO:0032502;GO:0032879;GO:0032880;GO:0033036;GO:0034109;GO:0034329;GO:0034330;GO:0034332;GO:0034333;GO:0034394;GO:0035633;GO:0040007;GO:0040012;GO:0040013;GO:…	GO:0002162;GO:0003779;GO:0005198;GO:0005488;GO:0005515;GO:0008013;GO:0008092;GO:0019899;GO:0031625;GO:0044389;GO:0045294;GO:0045296;GO:0050839;GO:0060090	GO:0005576;GO:0005737;GO:0005829;GO:0005856;GO:0005886;GO:0005903;GO:0005911;GO:0005912;GO:0005915;GO:0005916;GO:0005925;GO:0016020;GO:0030054;GO:0030055;GO:0030863;GO:0030864;GO:0031974;GO:0031982;GO:0031983;GO:0032991;GO:0034774;GO:0035580;GO:0042383;GO:0042995;GO:0043034;GO:0043226;GO:0043227;GO:0043228;GO:0043229;GO:0043230;GO:0043232;GO:0043233;GO:0044291;GO:0045121;GO:0060205;GO:0061826;GO:…	803	815	13.2283	13.8781	13.3534	13.7586	18.9009	14.5874	17.9661	13.6706	19.3457	13.3023	14.2589	13.6721	13.6087	11.8502	18.0382	11.8717	16.7196	12.3158	17.7228	19.7531	13.5754	12.793	17.3972	17.7055	17.1663	11.1965	17.8044	12.6145	17.6962	13.4109	16.5737	12.5121	16.5658	12.1095	16.9428
+	7.55819	2.41325	LC[125.0477]GEVLATPTENEEIQFLCIVCAK[54.0106]	sp|Q5W0V3|FHI2A_HUMAN	24K(54.0106),2C(125.0477)	Q5W0V3	FHI2A_HUMAN	FHIP2A	FHF complex subunit HOOK interacting protein 2A				138	161	13.3124	14.2409	12.5268	12.4365	13.6538	12.4673	13.092	12.5927	14.6775	13.1752	13.3067	12.8191	12.1609	12.2755	12.6096	12.9467	12.2866	11.4403	13.2863	14.6224	12.2027	12.6712	12.3083	11.976	19.2997	12.842	13.0615	12.9223	19.7514	12.9037	12.8926	12.1517	13.5214	13.1759	13.4545
+	3.48342	2.37938	KEAVESGKRQIENTLK[54.0106]	sp|P24043|LAMA2_HUMAN	16K(54.0106)	P24043	LAMA2_HUMAN	LAMA2	Laminin subunit alpha-2	GO:0001894;GO:0007155;GO:0007411;GO:0007517;GO:0009966;GO:0009967;GO:0009987;GO:0010001;GO:0010646;GO:0010647;GO:0014037;GO:0016043;GO:0023051;GO:0023056;GO:0030030;GO:0030154;GO:0030155;GO:0030334;GO:0031175;GO:0032222;GO:0032224;GO:0032501;GO:0032502;GO:0035633;GO:0040012;GO:0042592;GO:0045595;GO:0045597;GO:0045785;GO:0045995;GO:0048513;GO:0048518;GO:0048522;GO:0048583;GO:0048584;GO:0048856;GO:…	GO:0005102;GO:0005198;GO:0005488;GO:0005515	GO:0005576;GO:0005604;GO:0005886;GO:0016020;GO:0030054;GO:0030312;GO:0031012;GO:0031594;GO:0032991;GO:0042383;GO:0042995;GO:0043005;GO:0043083;GO:0043197;GO:0044309;GO:0045202;GO:0062023;GO:0098636;GO:0098637;GO:0098794;GO:0110165;GO:0120025	1818	1833	13.9036	13.4573	21.1276	13.4528	13.49	13.2237	12.9693	13.3723	12.8103	13.056	13.0415	21.7586	22.3438	20.4585	21.6871	20.5192	13.1879	20.6664	21.5162	13.738	12.5728	13.8432	20.946	13.8443	20.4444	18.4156	12.2665	12.4861	21.5185	22.0982	21.0491	20.7106	21.8676	13.8121	20.8901
+	3.55105	2.33146	EAVVDGTPCEPGK[54.0106]	sp|O95428|PPN_HUMAN	13K(54.0106)	O95428	PPN_HUMAN	PAPLN	Papilin	GO:0009987;GO:0016043;GO:0030198;GO:0043062;GO:0045229;GO:0071840	GO:0004857;GO:0004866;GO:0004867;GO:0030234;GO:0030414;GO:0061134;GO:0061135;GO:0098772;GO:0140678	GO:0005576;GO:0110165	133	145	14.0634	13.5711	12.8869	12.4181	22.2061	13.5031	21.8739	13.6645	13.4719	13.6975	21.3411	20.0256	13.998	16.9391	21.3314	20.4895	13.8701	17.6046	21.6902	22.9437	11.6674	13.8555	20.7221	12.5874	21.208	18.8593	21.9358	13.4364	21.4944	21.4588	21.0205	12.5184	22.1081	12.9855	20.6162
+	7.41172	2.32928	NK[54.0106]VSM[15.9949]APDGNGGLYR[54.0106]	sp|Q16222|UAP1_HUMAN	15R(54.0106),2K(54.0106),5M(15.9949)	Q16222	UAP1_HUMAN	UAP1	UDP-N-acetylhexosamine pyrophosphorylase	GO:0006040;GO:0006047;GO:0006048;GO:0006139;GO:0006725;GO:0006793;GO:0006807;GO:0008152;GO:0009058;GO:0009225;GO:0009226;GO:0009987;GO:0018130;GO:0019438;GO:0034641;GO:0034654;GO:0044237;GO:0044238;GO:0044249;GO:0044271;GO:0044281;GO:0046349;GO:0046483;GO:0055086;GO:0071704;GO:1901135;GO:1901137;GO:1901360;GO:1901362;GO:1901576	GO:0003824;GO:0003977;GO:0005488;GO:0005515;GO:0016740;GO:0016772;GO:0016779;GO:0042802;GO:0052630;GO:0070569	GO:0005654;GO:0005829;GO:0005886;GO:0016020;GO:0110165	214	228	13.5984	11.752	16.7448	12.9272	14.3285	14.415	13.2837	13.0207	13.5908	12.3138	14.1472	14.2268	13.0245	13.1525	13.1894	12.8398	12.7846	12.1682	13.2185	13.0349	12.6165	13.1153	13.519	11.9151	18.7951	12.0925	12.0265	12.0582	17.706	13.1718	13.3615	12.1302	13.0174	11.9665	12.5643
+	12.9875	2.32751	K[54.0106]PTSTDGPGQDAPGAESAGEPGEEAQALLEGFEGEMDMR[54.0106]	sp|Q8WYR4|RSPH1_HUMAN	1K(54.0106),39R(54.0106)	Q8WYR4	RSPH1_HUMAN	RSPH1	Radial spoke head 1 homolog	GO:0000226;GO:0001578;GO:0003006;GO:0006996;GO:0007010;GO:0007017;GO:0007049;GO:0007281;GO:0007286;GO:0009987;GO:0016043;GO:0022412;GO:0022414;GO:0022607;GO:0032502;GO:0035082;GO:0048468;GO:0048856;GO:0048869;GO:0051321;GO:0071840		GO:0000228;GO:0000793;GO:0000794;GO:0001520;GO:0001535;GO:0005634;GO:0005694;GO:0005819;GO:0005829;GO:0005929;GO:0031514;GO:0032991;GO:0042995;GO:0043226;GO:0043227;GO:0043228;GO:0043229;GO:0043231;GO:0043232;GO:0072687;GO:0099080;GO:0099081;GO:0099512;GO:0099513;GO:0110165;GO:0120025;GO:0120336;GO:0120338	227	265	13.9759	13.7942	12.291	13.1154	13.8486	12.6283	13.7757	11.8905	13.7802	12.3435	16.0952	13.1386	12.5014	13.285	18.2121	13.3509	17.1175	12.1676	17.1736	13.8261	11.0686	13.0828	14.2033	11.2534	17.0539	12.2423	14.7895	13.2223	16.8199	13.3426	19.9302	13.1671	15.5349	13.1547	13.7821
+	6.86937	2.31835	YLNEAAGVAAEEARNYK[54.0106]EK[54.0106]K	sp|Q8IZH2|XRN1_HUMAN	17K(54.0106),19K(54.0106)	Q8IZH2	XRN1_HUMAN	XRN1	5'-3' exoribonuclease 1	GO:0000956;GO:0006139;GO:0006401;GO:0006402;GO:0006417;GO:0006725;GO:0006807;GO:0008152;GO:0008334;GO:0009056;GO:0009057;GO:0009719;GO:0009889;GO:0009890;GO:0009892;GO:0009987;GO:0010033;GO:0010243;GO:0010468;GO:0010556;GO:0010558;GO:0010605;GO:0010608;GO:0010629;GO:0010639;GO:0014070;GO:0014074;GO:0016070;GO:0016071;GO:0016072;GO:0016075;GO:0017148;GO:0019219;GO:0019222;GO:0019439;GO:0031323;GO:…	GO:0002151;GO:0003676;GO:0003677;GO:0003723;GO:0003824;GO:0004518;GO:0004527;GO:0004532;GO:0004534;GO:0004540;GO:0005488;GO:0008409;GO:0016787;GO:0016788;GO:0016796;GO:0016896;GO:0051880;GO:0070034;GO:0097159;GO:0140098;GO:0140640	GO:0000932;GO:0005634;GO:0005829;GO:0005886;GO:0016020;GO:0030425;GO:0035770;GO:0036464;GO:0042995;GO:0043005;GO:0043025;GO:0043226;GO:0043227;GO:0043228;GO:0043229;GO:0043231;GO:0043232;GO:0044297;GO:0099080;GO:0110165;GO:0120025	369	388	12.4536	13.7313	19.3821	13.9744	14.0063	13.0979	13.3292	13.6719	13.4625	13.1953	19.3118	12.9137	12.7454	13.5429	17.9262	13.0853	12.6724	12.1053	18.8952	14.0275	11.4281	13.8207	12.6862	19.3619	18.7115	12.3669	12.7951	11.9394	20.1821	20.9958	19.6745	12.3569	19.4032	12.4529	12.8933
+	5.1111	2.31793	LR[54.0106]QFHLHWGSSDDHGSEHTVDGVK	sp|P07451|CAH3_HUMAN	2R(54.0106)	P07451	CAH3_HUMAN	CA3	Carbonic anhydrase 3	GO:0006730;GO:0008152;GO:0009605;GO:0009607;GO:0009617;GO:0009987;GO:0043207;GO:0044237;GO:0044281;GO:0044419;GO:0050896;GO:0051707	GO:0003824;GO:0004089;GO:0005488;GO:0008270;GO:0016151;GO:0016829;GO:0016835;GO:0016836;GO:0043167;GO:0043169;GO:0046872;GO:0046914	GO:0005737;GO:0005829;GO:0110165	90	113	13.4353	18.1872	13.7307	12.7792	13.4271	13.9506	19.9747	17.5541	20.0886	13.2631	18.1957	12.4626	13.3547	12.6103	20.2446	12.2918	18.149	11.4791	19.7352	22.0228	11.9324	13.6253	18.979	19.2013	19.0463	12.884	20.6857	12.2329	20.0158	18.8178	13.5369	12.442	20.0674	13.0149	17.1797
+	6.25809	2.31724	AK[54.0106]TGAAGK[54.0106]FK	sp|P39748|FEN1_HUMAN	2K(54.0106),8K(54.0106)	P39748	FEN1_HUMAN	FEN1	Flap endonuclease 1	GO:0000723;GO:0000724;GO:0000725;GO:0003008;GO:0006139;GO:0006259;GO:0006260;GO:0006281;GO:0006287;GO:0006302;GO:0006310;GO:0006401;GO:0006725;GO:0006807;GO:0006950;GO:0006974;GO:0006996;GO:0007063;GO:0007610;GO:0007611;GO:0007613;GO:0008152;GO:0009056;GO:0009057;GO:0009314;GO:0009411;GO:0009416;GO:0009628;GO:0009650;GO:0009987;GO:0010564;GO:0010638;GO:0016043;GO:0016070;GO:0019439;GO:0022402;GO:…	GO:0000287;GO:0003676;GO:0003677;GO:0003684;GO:0003690;GO:0003824;GO:0004518;GO:0004519;GO:0004520;GO:0004521;GO:0004523;GO:0004527;GO:0004529;GO:0004536;GO:0004540;GO:0005488;GO:0008309;GO:0008409;GO:0016787;GO:0016788;GO:0016796;GO:0016888;GO:0016891;GO:0016893;GO:0016895;GO:0017108;GO:0030145;GO:0043167;GO:0043169;GO:0046872;GO:0046914;GO:0048256;GO:0097159;GO:0140097;GO:0140098;GO:0140640	GO:0000781;GO:0005634;GO:0005654;GO:0005730;GO:0005739;GO:0016020;GO:0032991;GO:0043226;GO:0043227;GO:0043228;GO:0043229;GO:0043231;GO:0043232;GO:0098687;GO:0110165	368	377	19.2651	19.3504	18.8555	18.8752	21.2028	15.0263	21.6258	18.7546	20.6132	18.3089	18.3919	17.1433	15.8672	12.8691	20.0276	16.832	11.9041	11.0612	20.5691	22.1338	11.2414	18.8909	20.0776	20.4221	13.8422	12.0624	17.2337	17.8904	15.8067	19.9945	17.1087	17.4198	21.8475	13.1685	20.2862
+	4.40955	2.3126	DPIR[54.0106]TVGLGDAISAEGLFYSEVHPHY	sp|Q9BRR6|ADPGK_HUMAN	4R(54.0106)	Q9BRR6	ADPGK_HUMAN	ADPGK	ADP-dependent glucokinase	GO:0005975;GO:0005996;GO:0006006;GO:0006082;GO:0006090;GO:0006091;GO:0006096;GO:0006139;GO:0006163;GO:0006195;GO:0006725;GO:0006753;GO:0006793;GO:0006796;GO:0006807;GO:0008152;GO:0009056;GO:0009117;GO:0009132;GO:0009134;GO:0009135;GO:0009137;GO:0009141;GO:0009144;GO:0009150;GO:0009154;GO:0009166;GO:0009179;GO:0009181;GO:0009185;GO:0009191;GO:0009199;GO:0009205;GO:0009259;GO:0009261;GO:0009987;GO:…	GO:0003824;GO:0005488;GO:0016301;GO:0016740;GO:0016772;GO:0016773;GO:0043167;GO:0043169;GO:0043843;GO:0046872	GO:0005576;GO:0005783;GO:0005789;GO:0016020;GO:0031090;GO:0043226;GO:0043227;GO:0043229;GO:0043231;GO:0110165	472	497	20.1399	20.4631	20.2713	12.852	21.0947	20.4238	20.9622	19.9585	13.7757	13.047	20.4056	20.1136	12.686	12.547	14.2256	12.9787	12.7677	12.5425	12.7908	22.0583	12.1628	14.0737	19.9741	12.4218	20.2301	12.7832	12.2362	13.3376	18.1987	12.6975	13.0468	12.195	18.6902	12.5202	13.3287
+	14.2707	2.30803	KTTVLDVM[15.9949]R[54.0106]R	sp|P23258|TBG1_HUMAN	8M(15.9949),9R(54.0106)	P23258	TBG1_HUMAN	TUBG1	Tubulin gamma-1 chain	GO:0000070;GO:0000212;GO:0000226;GO:0000278;GO:0000819;GO:0006996;GO:0007010;GO:0007017;GO:0007020;GO:0007049;GO:0007051;GO:0007052;GO:0007059;GO:0009987;GO:0016043;GO:0022402;GO:0022414;GO:0031122;GO:0051276;GO:0071840;GO:0097435;GO:0098813;GO:1902850;GO:1903046;GO:1903047	GO:0000166;GO:0005198;GO:0005200;GO:0005488;GO:0005515;GO:0005525;GO:0017076;GO:0019001;GO:0032553;GO:0032555;GO:0032561;GO:0035639;GO:0036094;GO:0042802;GO:0043167;GO:0043168;GO:0097159;GO:0097367;GO:1901265;GO:1901363	GO:0000228;GO:0000242;GO:0000793;GO:0000794;GO:0000930;GO:0005634;GO:0005694;GO:0005737;GO:0005768;GO:0005813;GO:0005814;GO:0005815;GO:0005819;GO:0005827;GO:0005829;GO:0005874;GO:0005876;GO:0005881;GO:0005929;GO:0031252;GO:0031410;GO:0031982;GO:0032991;GO:0036064;GO:0042995;GO:0043005;GO:0043226;GO:0043227;GO:0043228;GO:0043229;GO:0043231;GO:0043232;GO:0045177;GO:0055037;GO:0097708;GO:0097730;GO:…	287	296	16.1691	15.5371	15.6355	15.4958	17.0579	15.6485	17.1784	15.1827	16.5212	15.3026	16.6365	13.3472	13.6128	11.9956	17.0857	12.0355	15.1961	12.5374	16.501	17.4756	12.9426	15.6358	15.5698	15.7575	15.5972	11.5525	16.6272	11.6362	15.5367	15.6233	16.1548	13.9249	16.6282	11.324	17.1516
+	4.65527	2.30401	K[54.0106]TLCALWQGSQTAFSPESLFYVVWK[54.0106]	sp|Q9Y6I4|UBP3_HUMAN	1K(54.0106),25K(54.0106)	Q9Y6I4	UBP3_HUMAN	USP3	Ubiquitin carboxyl-terminal hydrolase 3	GO:0000122;GO:0006139;GO:0006259;GO:0006281;GO:0006325;GO:0006338;GO:0006355;GO:0006357;GO:0006508;GO:0006725;GO:0006807;GO:0006950;GO:0006974;GO:0007049;GO:0008152;GO:0009889;GO:0009890;GO:0009892;GO:0009987;GO:0010468;GO:0010556;GO:0010558;GO:0010605;GO:0016043;GO:0019219;GO:0019222;GO:0019538;GO:0031323;GO:0031324;GO:0031326;GO:0031327;GO:0033554;GO:0034641;GO:0043170;GO:0043933;GO:0044237;GO:…	GO:0000976;GO:0000977;GO:0000978;GO:0000987;GO:0001067;GO:0003676;GO:0003677;GO:0003682;GO:0003690;GO:0003824;GO:0004843;GO:0005488;GO:0005515;GO:0008233;GO:0008234;GO:0008270;GO:0016787;GO:0019783;GO:0042393;GO:0043167;GO:0043169;GO:0043565;GO:0044877;GO:0046872;GO:0046914;GO:0097159;GO:0101005;GO:0140096;GO:1990837;GO:1990841	GO:0000785;GO:0005634;GO:0005654;GO:0005737;GO:0032991;GO:0032993;GO:0035770;GO:0036464;GO:0043226;GO:0043227;GO:0043228;GO:0043229;GO:0043231;GO:0043232;GO:0090543;GO:0099080;GO:0110165	224	248	13.4867	14.1138	13.2475	12.2735	12.6101	13.1056	13.0992	15.7646	12.6682	16.118	12.8219	14.0676	13.6512	12.9967	13.2938	13.1813	12.2752	11.4338	13.5001	13.4257	11.6766	12.5884	13.6169	12.2902	12.6362	12.493	13.5336	13.1806	21.4399	12.1201	13.4492	13.2729	12.2274	13.4541	13.1454
+	6.99724	2.30265	ISAHQGAQVDSR[54.0106]HPQGQWR	sp|O95049|ZO3_HUMAN	12R(54.0106)	O95049	ZO3_HUMAN	TJP3	Tight junction protein ZO-3	GO:0001885;GO:0001894;GO:0002064;GO:0003008;GO:0003013;GO:0003018;GO:0007155;GO:0008104;GO:0009987;GO:0016043;GO:0032501;GO:0032502;GO:0033036;GO:0034330;GO:0035633;GO:0042592;GO:0043114;GO:0043117;GO:0045216;GO:0048468;GO:0048856;GO:0048869;GO:0048871;GO:0051179;GO:0051641;GO:0060249;GO:0061028;GO:0065007;GO:0065008;GO:0070727;GO:0071840;GO:0090557;GO:0098609;GO:0150105;GO:1902414;GO:1905603;GO:…	GO:0005488;GO:0005515;GO:0050839	GO:0005634;GO:0005654;GO:0005886;GO:0005911;GO:0005923;GO:0016020;GO:0030054;GO:0043226;GO:0043227;GO:0043229;GO:0043231;GO:0070160;GO:0070161;GO:0110165	863	881	13.1782	13.4893	12.2989	12.9549	12.8253	13.8597	13.7363	11.2501	14.3947	12.1938	12.2658	13.0136	13.5474	12.9647	13.7367	13.1853	11.5551	12.8677	12.0598	13.1778	12.1966	13.3039	14.2481	11.9705	11.9982	12.1905	12.9429	13.244	18.2596	12.8327	12.0811	13.244	20.2051	12.5205	12.5372
+	6.6001	2.29863	PSIPSKFTDRRTDQFNGYSK[54.0106]	sp|Q9NR99|MXRA5_HUMAN	20K(54.0106)	Q9NR99	MXRA5_HUMAN	MXRA5	Matrix-remodeling-associated protein 5	GO:0009719;GO:0050896;GO:0070848;GO:0071559	GO:0005198;GO:0005201	GO:0005576;GO:0030312;GO:0031012;GO:0031982;GO:0043226;GO:0043227;GO:0043230;GO:0062023;GO:0065010;GO:0070062;GO:0110165;GO:1903561	1681	1700	18.5991	14.3831	18.3337	17.8562	13.7962	13.4905	12.6456	18.4996	19.6056	17.0778	13.3307	14.148	12.848	12.3483	12.2651	11.7618	12.9655	11.1138	11.8124	14.3457	11.7288	12.879	17.9524	13.606	13.0117	12.5211	12.6946	18.0184	18.5131	13.4438	18.1467	12.062	19.1586	12.4347	18.9228
+	7.11294	2.2885	VAPADGFSDLAMQVMTSPSK[54.0106]	sp|Q92896|GSLG1_HUMAN	20K(54.0106)	Q92896	GSLG1_HUMAN	GLG1	Golgi apparatus protein 1	GO:0006508;GO:0006807;GO:0007165;GO:0007166;GO:0007167;GO:0007178;GO:0007179;GO:0008152;GO:0009653;GO:0009887;GO:0009889;GO:0009890;GO:0009892;GO:0009966;GO:0009968;GO:0009987;GO:0010468;GO:0010556;GO:0010558;GO:0010605;GO:0010629;GO:0010646;GO:0010648;GO:0010955;GO:0016485;GO:0017015;GO:0019222;GO:0019538;GO:0023051;GO:0023057;GO:0030162;GO:0030512;GO:0031323;GO:0031324;GO:0031326;GO:0031327;GO:…	GO:0005102;GO:0005488;GO:0005515;GO:0017134;GO:0019838	GO:0000139;GO:0005794;GO:0005856;GO:0005886;GO:0016020;GO:0030312;GO:0031012;GO:0031090;GO:0031982;GO:0043226;GO:0043227;GO:0043228;GO:0043229;GO:0043230;GO:0043231;GO:0043232;GO:0065010;GO:0070062;GO:0098588;GO:0110165;GO:1903561	1125	1144	12.8036	13.6483	17.7491	13.2835	13.4566	13.7499	14.0775	13.2678	14.8933	13.5825	14.3303	12.6458	13.009	12.7679	12.7371	12.9208	12.5712	11.8993	13.5213	13.4638	12.3641	14.789	13.5598	13.1204	18.9387	13.0945	12.9835	12.1338	18.5182	12.1249	12.8948	12.2196	12.7589	13.0636	13.2931
+	9.11178	2.28549	HIQELSGDNIDQIK[54.0106]	sp|P10746|HEM4_HUMAN	14K(54.0106)	P10746	HEM4_HUMAN	UROS	Uroporphyrinogen-III synthase	GO:0006082;GO:0006725;GO:0006778;GO:0006779;GO:0006780;GO:0006782;GO:0006783;GO:0006807;GO:0008152;GO:0009058;GO:0009719;GO:0009987;GO:0010033;GO:0010035;GO:0010038;GO:0010243;GO:0014075;GO:0016053;GO:0018130;GO:0019438;GO:0019752;GO:0033013;GO:0033014;GO:0034641;GO:0042168;GO:0042221;GO:0042440;GO:0043436;GO:0044237;GO:0044249;GO:0044271;GO:0044281;GO:0044283;GO:0046148;GO:0046394;GO:0046483;GO:…	GO:0003824;GO:0004852;GO:0005488;GO:0005542;GO:0016829;GO:0016835;GO:0016836;GO:0019842;GO:0031406;GO:0033218;GO:0036094;GO:0043167;GO:0043168;GO:0043177;GO:0072341;GO:0097159;GO:1901363	GO:0005739;GO:0005829;GO:0043226;GO:0043227;GO:0043229;GO:0043231;GO:0110165	207	220	17.7084	16.761	17.5103	13.9351	13.8366	13.0149	13.3647	13.301	13.5439	13.3422	13.0545	12.2714	12.2788	13.009	18.8218	12.2271	17.0629	11.9029	18.5279	18.9957	12.2905	13.2422	12.6555	12.4403	13.0358	12.3891	12.6777	13.2965	18.6213	12.5477	12.9291	12.1287	12.9983	12.5418	12.6128
+	7.87837	2.28047	GFLRAIK[54.0106]ATPM[15.9949]AVADVIPVDTVVNLMLAVGWYTAVHRPK	sp|Q96K12|FACR2_HUMAN	11M(15.9949),7K(54.0106)	Q96K12	FACR2_HUMAN	FAR2	Fatty acyl-CoA reductase 2	GO:0006139;GO:0006163;GO:0006629;GO:0006637;GO:0006725;GO:0006753;GO:0006790;GO:0006793;GO:0006796;GO:0006807;GO:0008152;GO:0008610;GO:0009058;GO:0009117;GO:0009150;GO:0009259;GO:0009987;GO:0010025;GO:0010166;GO:0019637;GO:0019693;GO:0033865;GO:0033875;GO:0034032;GO:0034641;GO:0035336;GO:0035337;GO:0035383;GO:0043603;GO:0044237;GO:0044238;GO:0044281;GO:0046483;GO:0055086;GO:0071704;GO:0072521;GO:…	GO:0003824;GO:0016491;GO:0016620;GO:0016903;GO:0080019;GO:0102965	GO:0005777;GO:0005778;GO:0016020;GO:0031090;GO:0031903;GO:0042579;GO:0043226;GO:0043227;GO:0043229;GO:0043231;GO:0098588;GO:0110165	260	298	12.9484	13.1127	12.643	11.9788	20.0626	13.3791	19.1878	11.3886	13.4088	13.1298	19.3374	13.1366	12.8697	13.5891	18.2003	12.8063	12.3369	11.7887	19.7879	20.3235	12.6075	13.7452	13.7564	11.5465	17.6519	12.1901	18.248	12.429	19.1397	16.6933	12.5107	13.0336	19.6202	12.3884	13.2945
+	6.76271	2.28018	ADPSTRIETGVR[54.0106]QGDEVSVHYDPMIAK[54.0106]	sp|Q96RQ3|MCCA_HUMAN	12R(54.0106),27K(54.0106)	Q96RQ3	MCCA_HUMAN	MCCC1	Methylcrotonoyl-CoA carboxylase subunit alpha, mitochondrial	GO:0006082;GO:0006520;GO:0006551;GO:0006552;GO:0006766;GO:0006767;GO:0006768;GO:0006790;GO:0006807;GO:0008152;GO:0009056;GO:0009063;GO:0009081;GO:0009083;GO:0009987;GO:0016054;GO:0019752;GO:0032787;GO:0043436;GO:0043603;GO:0044237;GO:0044238;GO:0044248;GO:0044281;GO:0044282;GO:0046395;GO:0046483;GO:0071704;GO:1901360;GO:1901564;GO:1901565;GO:1901575;GO:1901605;GO:1901606	GO:0000166;GO:0003824;GO:0004075;GO:0004485;GO:0005488;GO:0005524;GO:0009374;GO:0016421;GO:0016874;GO:0016879;GO:0016885;GO:0017076;GO:0019842;GO:0030554;GO:0031406;GO:0032553;GO:0032555;GO:0032559;GO:0033218;GO:0033293;GO:0035639;GO:0036094;GO:0043167;GO:0043168;GO:0043169;GO:0043177;GO:0046872;GO:0097159;GO:0097367;GO:1901265;GO:1901363;GO:1901681	GO:0002169;GO:0005739;GO:0005759;GO:0005829;GO:0031974;GO:0032991;GO:0043226;GO:0043227;GO:0043229;GO:0043231;GO:0043233;GO:0070013;GO:0098798;GO:0110165;GO:1902494;GO:1905202	410	436	13.3716	13.7958	12.2193	13.5474	14.2471	12.657	12.8122	12.1536	12.9873	13.0392	13.2353	11.5956	12.5553	13.3559	17.8845	12.3718	12.9641	12.0569	16.1346	14.059	11.8787	12.7543	13.362	13.2954	12.465	12.2198	13.7386	13.0137	20.5323	12.8419	13.1988	13.2109	13.7641	12.3473	13.4344
+	8.23054	2.23796	AAQCVR[54.0106]LAR[54.0106]R[54.0106]	sp|Q9HAV7|GRPE1_HUMAN	10R(54.0106),6R(54.0106),9R(54.0106)	Q9HAV7	GRPE1_HUMAN	GRPEL1	GrpE protein homolog 1, mitochondrial	GO:0006457;GO:0006810;GO:0006839;GO:0006886;GO:0008104;GO:0009987;GO:0015031;GO:0030150;GO:0033036;GO:0033365;GO:0044743;GO:0045184;GO:0046907;GO:0051179;GO:0051234;GO:0051641;GO:0051649;GO:0055085;GO:0070585;GO:0070727;GO:0071702;GO:0071705;GO:0071806;GO:0072594;GO:0072655;GO:1990542	GO:0000166;GO:0000774;GO:0005488;GO:0005515;GO:0017076;GO:0030554;GO:0036094;GO:0042802;GO:0042803;GO:0046983;GO:0051082;GO:0051087;GO:0060590;GO:0097159;GO:0098772;GO:1901265;GO:1901363	GO:0001405;GO:0005654;GO:0005739;GO:0005743;GO:0005744;GO:0005759;GO:0016020;GO:0019866;GO:0031090;GO:0031966;GO:0031974;GO:0032991;GO:0043226;GO:0043227;GO:0043229;GO:0043231;GO:0043233;GO:0070013;GO:0098796;GO:0098798;GO:0098800;GO:0110165	2	11	17.6276	15.0076	12.7323	15.4909	17.4387	16.4582	17.002	15.9091	17.4192	15.7326	17.7705	17.2513	13.2041	13.3168	17.6247	13.0372	12.4364	12.082	17.3972	15.3593	12.1963	16.8236	12.693	12.8936	17.2553	12.3479	17.1603	12.9564	17.6924	13.9803	13.7605	12.1407	17.2791	13.3335	13.1232
+	5.85166	2.23646	K[54.0106]QILDEK[54.0106]IYCPPEASVLLASYAVQAK[54.0106]	sp|P35240|MERL_HUMAN	1K(54.0106),26K(54.0106),7K(54.0106)	P35240	MERL_HUMAN	NF2	Merlin	GO:0000165;GO:0001704;GO:0001707;GO:0001932;GO:0001933;GO:0001952;GO:0001953;GO:0006996;GO:0007010;GO:0007162;GO:0007165;GO:0007398;GO:0008283;GO:0008285;GO:0008360;GO:0009653;GO:0009887;GO:0009888;GO:0009892;GO:0009966;GO:0009968;GO:0009987;GO:0010563;GO:0010605;GO:0010624;GO:0010626;GO:0010638;GO:0010646;GO:0010648;GO:0010721;GO:0010810;GO:0010812;GO:0014009;GO:0014010;GO:0014013;GO:0014014;GO:…	GO:0003779;GO:0005102;GO:0005178;GO:0005488;GO:0005515;GO:0008092;GO:0044877;GO:0050839	GO:0005634;GO:0005730;GO:0005737;GO:0005768;GO:0005769;GO:0005829;GO:0005856;GO:0005886;GO:0005911;GO:0005912;GO:0016020;GO:0030027;GO:0030054;GO:0030175;GO:0030863;GO:0030864;GO:0031253;GO:0031256;GO:0031410;GO:0031527;GO:0031982;GO:0032154;GO:0032587;GO:0042995;GO:0043005;GO:0043226;GO:0043227;GO:0043228;GO:0043229;GO:0043231;GO:0043232;GO:0044297;GO:0045177;GO:0048471;GO:0070161;GO:0097708;GO:…	124	149	19.438	12.7761	19.3494	13.4292	20.6489	20.3636	13.4118	12.216	21.507	13.1905	20.0076	12.9635	12.6354	12.5436	20.3138	12.3759	12.7259	12.7734	19.9563	13.5168	12.1543	14.4762	19.4835	12.9306	13.2559	12.1296	12.7679	13.5598	18.8306	12.615	18.7541	13.689	19.6464	12.5517	19.8109
+	13.0274	2.23111	FEEK[54.0106]LQELESVSR[54.0106]	sp|O95786|RIGI_HUMAN	13R(54.0106),4K(54.0106)	O95786	RIGI_HUMAN	RIGI	Antiviral innate immune response receptor RIG-I	GO:0001817;GO:0001819;GO:0002218;GO:0002221;GO:0002230;GO:0002253;GO:0002376;GO:0002682;GO:0002684;GO:0002697;GO:0002699;GO:0002700;GO:0002702;GO:0002703;GO:0002705;GO:0002718;GO:0002720;GO:0002730;GO:0002732;GO:0002733;GO:0002735;GO:0002753;GO:0002757;GO:0002758;GO:0002764;GO:0002831;GO:0002833;GO:0002886;GO:0002888;GO:0006355;GO:0006357;GO:0006950;GO:0006952;GO:0006955;GO:0007165;GO:0008152;GO:…	GO:0000166;GO:0003676;GO:0003677;GO:0003690;GO:0003723;GO:0003724;GO:0003725;GO:0003727;GO:0003824;GO:0004386;GO:0005488;GO:0005515;GO:0005524;GO:0005525;GO:0008186;GO:0008270;GO:0016462;GO:0016787;GO:0016817;GO:0016818;GO:0016887;GO:0017076;GO:0017111;GO:0019001;GO:0019899;GO:0030554;GO:0031625;GO:0032553;GO:0032555;GO:0032559;GO:0032561;GO:0035639;GO:0036094;GO:0038023;GO:0038187;GO:0042802;GO:…	GO:0005737;GO:0005829;GO:0005856;GO:0005911;GO:0005923;GO:0015629;GO:0016020;GO:0030054;GO:0031253;GO:0031256;GO:0032587;GO:0032991;GO:0043226;GO:0043228;GO:0043229;GO:0043232;GO:0070160;GO:0070161;GO:0098590;GO:0110165;GO:1990904	590	602	16.1165	16.9436	16.2236	13.3605	17.8825	16.1061	16.748	12.7168	17.4995	12.9559	16.9994	13.4536	13.2328	13.6379	16.9155	12.368	12.5183	10.9331	16.9761	18.4243	12.5656	13.8429	16.4777	12.7907	16.3486	11.6215	17.0956	12.7902	16.6617	15.6775	16.1994	12.6955	17.9586	13.2645	16.992
+	5.57199	2.22819	K[54.0106]IVIRPEPNLFHDGR[54.0106]EHSVHVER[54.0106]	sp|P24043|LAMA2_HUMAN	15R(54.0106),1K(54.0106),23R(54.0106)	P24043	LAMA2_HUMAN	LAMA2	Laminin subunit alpha-2	GO:0001894;GO:0007155;GO:0007411;GO:0007517;GO:0009966;GO:0009967;GO:0009987;GO:0010001;GO:0010646;GO:0010647;GO:0014037;GO:0016043;GO:0023051;GO:0023056;GO:0030030;GO:0030154;GO:0030155;GO:0030334;GO:0031175;GO:0032222;GO:0032224;GO:0032501;GO:0032502;GO:0035633;GO:0040012;GO:0042592;GO:0045595;GO:0045597;GO:0045785;GO:0045995;GO:0048513;GO:0048518;GO:0048522;GO:0048583;GO:0048584;GO:0048856;GO:…	GO:0005102;GO:0005198;GO:0005488;GO:0005515	GO:0005576;GO:0005604;GO:0005886;GO:0016020;GO:0030054;GO:0030312;GO:0031012;GO:0031594;GO:0032991;GO:0042383;GO:0042995;GO:0043005;GO:0043083;GO:0043197;GO:0044309;GO:0045202;GO:0062023;GO:0098636;GO:0098637;GO:0098794;GO:0110165;GO:0120025	2608	2630	15.5041	12.6993	11.7385	13.0208	13.2945	14.4015	14.2852	12.932	17.9272	12.1903	13.9788	12.1808	15.9973	16.3025	17.1195	16.675	13.6895	12.6139	13.3053	13.8867	12.2623	13.0555	13.2721	11.8892	18.8446	11.9261	13.304	13.6868	11.939	11.968	12.9119	11.7734	12.9604	15.2962	14.127
+	9.51398	2.22343	K[54.0106]GGVASGFK	sp|P06396|GELS_HUMAN	1K(54.0106)	P06396	GELS_HUMAN	GSN	Gelsolin	GO:0003008;GO:0003012;GO:0003014;GO:0006807;GO:0006911;GO:0006915;GO:0006996;GO:0007015;GO:0007417;GO:0008064;GO:0008152;GO:0008154;GO:0008219;GO:0009605;GO:0009612;GO:0009628;GO:0009889;GO:0009891;GO:0009893;GO:0009987;GO:0010033;GO:0010324;GO:0010468;GO:0010556;GO:0010557;GO:0010604;GO:0010628;GO:0010638;GO:0010639;GO:0010950;GO:0010952;GO:0010954;GO:0012501;GO:0014888;GO:0014889;GO:0014891;GO:…	GO:0003779;GO:0005488;GO:0005509;GO:0005515;GO:0005543;GO:0005546;GO:0008092;GO:0008289;GO:0017022;GO:0019899;GO:0019900;GO:0035091;GO:0036313;GO:0043167;GO:0043168;GO:0043169;GO:0043548;GO:0044877;GO:0045159;GO:0046872;GO:0051015;GO:1901981;GO:1902936	GO:0002102;GO:0005576;GO:0005615;GO:0005737;GO:0005829;GO:0005856;GO:0005886;GO:0005925;GO:0015629;GO:0016020;GO:0016528;GO:0030027;GO:0030054;GO:0030055;GO:0030139;GO:0030478;GO:0030863;GO:0030864;GO:0031410;GO:0031974;GO:0031982;GO:0031983;GO:0034774;GO:0042995;GO:0043226;GO:0043227;GO:0043228;GO:0043229;GO:0043230;GO:0043231;GO:0043232;GO:0043233;GO:0045335;GO:0060205;GO:0065010;GO:0070013;GO:…	169	177	17.2597	18.0878	17.5655	17.3218	18.8367	17.6381	18.2896	17.555	19.0163	17.0461	18.2729	16.5548	13.0365	13.7547	17.9883	12.3632	16.2474	11.7019	18.5427	19.9603	11.3681	17.3672	17.6204	17.3701	17.2273	12.4422	18.2113	12.8412	17.9616	16.9098	16.7249	14.6658	18.5491	12.4113	16.8518
+	10.6526	2.21904	YLAEEEGTFGDK[54.0106]TDTHLK[54.0106]	sp|Q8IWG1|DNAI3_HUMAN	12K(54.0106),18K(54.0106)	Q8IWG1	DNAI3_HUMAN	DNAI3	Dynein axonemal intermediate chain 3	GO:0003341;GO:0007017;GO:0007018;GO:0009987;GO:0010639;GO:0016043;GO:0022607;GO:0030334;GO:0030336;GO:0032956;GO:0032970;GO:0033043;GO:0034315;GO:0034316;GO:0036159;GO:0040012;GO:0040013;GO:0043933;GO:0045595;GO:0045597;GO:0045667;GO:0045669;GO:0048518;GO:0048519;GO:0048522;GO:0048523;GO:0050789;GO:0050793;GO:0050794;GO:0051094;GO:0051125;GO:0051126;GO:0051128;GO:0051129;GO:0051493;GO:0051494;GO:…	GO:0005488;GO:0005515;GO:0044877;GO:0045503;GO:0045504;GO:0071933	GO:0005737;GO:0005858;GO:0005875;GO:0030286;GO:0032991;GO:0036156;GO:0110165;GO:1902494	306	323	12.4533	13.325	14.5065	13.1826	14.031	13.4423	12.4601	13.2866	12.8828	12.92	13.9158	12.8072	13.0537	12.8752	13.9033	13.2986	12.5918	12.2364	14.422	14.5181	13.199	13.254	13.76	12.4836	14.948	13.0184	13.8202	13.3116	16.4078	14.0772	13.2999	11.8564	12.553	11.875	13.0292
+	4.00742	2.20353	KEPM[15.9949]APSHSGIPKPGMK[54.0106]SMPGK[54.0106]	sp|Q8IVL1|NAV2_HUMAN	17K(54.0106),22K(54.0106),4M(15.9949)	Q8IVL1	NAV2_HUMAN	NAV2	Neuron navigator 2	GO:0001976;GO:0003008;GO:0003025;GO:0007600;GO:0007605;GO:0007606;GO:0007608;GO:0007610;GO:0007626;GO:0009987;GO:0021545;GO:0021554;GO:0021563;GO:0021564;GO:0021675;GO:0022008;GO:0030154;GO:0032501;GO:0032502;GO:0048856;GO:0048869;GO:0050877;GO:0050954	GO:0000166;GO:0003678;GO:0003824;GO:0004386;GO:0005488;GO:0005524;GO:0005539;GO:0008094;GO:0008201;GO:0016462;GO:0016787;GO:0016817;GO:0016818;GO:0016887;GO:0017076;GO:0017111;GO:0030554;GO:0032553;GO:0032555;GO:0032559;GO:0035639;GO:0036094;GO:0043138;GO:0043167;GO:0043168;GO:0097159;GO:0097367;GO:0140097;GO:0140640;GO:0140657;GO:1901265;GO:1901363;GO:1901681	GO:0005614;GO:0005654;GO:0030312;GO:0031012;GO:0062023;GO:0110165	577	598	12.7105	13.3386	12.6767	12.4528	22.5866	13.1132	22.6054	12.9702	13.1263	13.2457	13.1789	13.5673	12.6967	12.2231	21.984	12.6993	11.8591	12.8799	22.7596	22.2775	12.7432	13.0525	12.8149	12.5618	13.0502	12.5491	21.729	12.1521	13.2825	11.9585	12.6971	12.6059	12.7674	12.4238	12.7122
+	7.21426	2.19669	K[54.0106]YIPQDMGK	sp|P28857|DPOL_HHV6U	1K(54.0106)	P28857	DPOL_HHV6U	U38	DNA polymerase catalytic subunit				242	250	15.4031	13.4777	14.5444	12.8137	13.0113	13.3464	13.0299	12.5013	13.484	12.9128	12.8704	14.8044	12.8234	12.3096	18.5822	12.8271	19.591	11.6094	13.4959	13.2007	12.4112	12.3153	20.2741	11.4835	17.4021	14.2579	13.0803	12.4106	15.3526	12.9404	19.328	12.4478	12.5291	13.5852	19.5078
+	9.95617	2.19593	KVLAGVVMTTGTDVK[54.0106]DAK[54.0106]	sp|P78563|RED1_HUMAN	15K(54.0106),18K(54.0106)	P78563	RED1_HUMAN	ADARB1	Double-stranded RNA-specific editase 1	GO:0001932;GO:0001933;GO:0002376;GO:0003008;GO:0006139;GO:0006382;GO:0006396;GO:0006397;GO:0006469;GO:0006725;GO:0006807;GO:0006915;GO:0006950;GO:0006952;GO:0006955;GO:0007154;GO:0007267;GO:0007268;GO:0007274;GO:0007409;GO:0007610;GO:0008152;GO:0008219;GO:0008285;GO:0009451;GO:0009605;GO:0009607;GO:0009615;GO:0009653;GO:0009892;GO:0009987;GO:0010563;GO:0010605;GO:0012501;GO:0016043;GO:0016070;GO:…	GO:0003676;GO:0003723;GO:0003725;GO:0003726;GO:0003729;GO:0003824;GO:0004000;GO:0005488;GO:0005515;GO:0008251;GO:0016787;GO:0016810;GO:0016814;GO:0019239;GO:0042802;GO:0043167;GO:0043169;GO:0046872;GO:0097159	GO:0005634;GO:0005654;GO:0005730;GO:0005737;GO:0005829;GO:0030054;GO:0043226;GO:0043227;GO:0043228;GO:0043229;GO:0043231;GO:0043232;GO:0045202;GO:0110165	350	367	15.9811	14.9629	16.0033	12.8154	18.443	17.2572	17.7968	17.4148	18.78	16.551	17.8934	13.9857	14.9449	12.0518	18.0646	15.1471	15.7441	11.1178	18.2052	14.4895	11.8417	17.2209	17.4985	17.2105	17.3588	13.4346	17.953	15.4953	16.4247	16.9978	16.9563	15.2335	18.253	14.7854	16.8608
+	5.97491	2.18892	SLVKTLVCGVK[54.0106]	sp|Q9Y4A5|TRRAP_HUMAN	11K(54.0106)	Q9Y4A5	TRRAP_HUMAN	TRRAP	Transformation/transcription domain-associated protein	GO:0000018;GO:0006139;GO:0006259;GO:0006281;GO:0006282;GO:0006325;GO:0006355;GO:0006357;GO:0006725;GO:0006807;GO:0006950;GO:0006974;GO:0008152;GO:0009889;GO:0009891;GO:0009893;GO:0009987;GO:0010468;GO:0010556;GO:0010557;GO:0010569;GO:0010604;GO:0016043;GO:0019219;GO:0019222;GO:0031323;GO:0031325;GO:0031326;GO:0031328;GO:0033554;GO:0034641;GO:0042981;GO:0043067;GO:0043170;GO:0043484;GO:0043933;GO:…	GO:0003712;GO:0140110	GO:0000118;GO:0000123;GO:0000124;GO:0000786;GO:0000812;GO:0005634;GO:0005654;GO:0005667;GO:0005794;GO:0031248;GO:0032991;GO:0032993;GO:0033276;GO:0035267;GO:0043189;GO:0043226;GO:0043227;GO:0043229;GO:0043231;GO:0070461;GO:0070603;GO:0090575;GO:0097346;GO:0110165;GO:0140513;GO:0140535;GO:1902493;GO:1902494;GO:1902562;GO:1904949;GO:1905368;GO:1990234	548	558	15.7673	13.8029	12.5439	13.7307	12.7238	14.6239	13.5672	12.4597	13.6462	13.1444	13.5967	12.8884	12.471	11.7812	13.5512	13.3175	18.1005	11.6067	18.6694	19.3645	11.4379	12.8187	15.0014	14.9424	15.2646	11.7353	21.3185	19.6294	13.9895	12.3092	15.2916	13.2156	20.268	14.0999	12.6382
+	8.77623	2.16288	TIAAR[54.0106]TLGDLVRK[54.0106]LGEK[54.0106]	sp|Q92616|GCN1_HUMAN	13K(54.0106),17K(54.0106),5R(54.0106)	Q92616	GCN1_HUMAN	GCN1	eIF-2-alpha kinase activator GCN1	GO:0006414;GO:0006417;GO:0006950;GO:0006996;GO:0007154;GO:0008152;GO:0009058;GO:0009059;GO:0009267;GO:0009605;GO:0009889;GO:0009987;GO:0009991;GO:0010468;GO:0010556;GO:0010608;GO:0016043;GO:0019222;GO:0022411;GO:0031323;GO:0031326;GO:0031667;GO:0031668;GO:0031669;GO:0032790;GO:0033554;GO:0034198;GO:0034248;GO:0042594;GO:0043170;GO:0044237;GO:0044249;GO:0050789;GO:0050794;GO:0050896;GO:0051171;GO:…	GO:0003676;GO:0003723;GO:0005488;GO:0005515;GO:0008047;GO:0008135;GO:0019207;GO:0019209;GO:0019887;GO:0030234;GO:0030295;GO:0043021;GO:0043022;GO:0043539;GO:0044877;GO:0045182;GO:0045296;GO:0050839;GO:0060090;GO:0090079;GO:0097159;GO:0098772;GO:0140677;GO:0170011	GO:0005737;GO:0005829;GO:0005840;GO:0005844;GO:0016020;GO:0022626;GO:0032991;GO:0043226;GO:0043228;GO:0043229;GO:0043232;GO:0110165;GO:1990904	1943	1959	12.1652	13.9144	12.2269	13.0228	14.5113	13.3244	14.1637	12.8573	13.2428	14.034	13.1807	13.0403	12.3001	12.3955	13.1736	12.4675	13.9166	12.6132	11.668	14.477	13.3091	13.5059	12.7751	13.2657	13.4588	12.4597	13.1845	12.3306	19.7689	13.7023	14.1448	12.7936	19.3731	11.8677	13.5913
+	3.31258	2.15084	ELK[54.0106]MAEIK[54.0106]VK	sp|Q9BPX3|CND3_HUMAN	3K(54.0106),8K(54.0106)	Q9BPX3	CND3_HUMAN	NCAPG	Condensin complex subunit 3	GO:0006996;GO:0007076;GO:0009987;GO:0010564;GO:0010638;GO:0016043;GO:0022402;GO:0030261;GO:0033043;GO:0033044;GO:0045787;GO:0048518;GO:0048522;GO:0050789;GO:0050794;GO:0051128;GO:0051130;GO:0051276;GO:0051301;GO:0051726;GO:0051983;GO:0051984;GO:0060623;GO:0065007;GO:0071840;GO:0090068;GO:1903047;GO:1905818;GO:1905820;GO:1905821;GO:2001252		GO:0000228;GO:0000775;GO:0000779;GO:0000793;GO:0000794;GO:0000796;GO:0005634;GO:0005694;GO:0005737;GO:0005829;GO:0016020;GO:0032991;GO:0043226;GO:0043227;GO:0043228;GO:0043229;GO:0043231;GO:0043232;GO:0098687;GO:0110165	489	498	20.7031	14.0792	20.7437	20.4436	13.513	21.1809	21.7881	13.8471	22.2467	21.0005	13.7991	12.5088	18.4383	12.4738	20.6132	12.7004	19.519	18.1192	21.1548	23.5503	13.3715	20.7452	20.263	11.4261	12.676	16.7627	18.8917	19.7679	12.3355	13.2838	19.445	11.5465	13.6354	12.1439	20.2863
+	8.22747	2.14597	MSRGSSAGFDR[54.0106]	sp|P60900|PSA6_HUMAN	11R(54.0106)	P60900	PSA6_HUMAN	PSMA6	Proteasome subunit alpha type-6	GO:0006355;GO:0006508;GO:0006511;GO:0006807;GO:0008152;GO:0009056;GO:0009057;GO:0009889;GO:0010468;GO:0010498;GO:0010556;GO:0019219;GO:0019222;GO:0019538;GO:0019941;GO:0030163;GO:0031323;GO:0031326;GO:0031347;GO:0032101;GO:0043161;GO:0043170;GO:0043632;GO:0044093;GO:0044238;GO:0048583;GO:0050727;GO:0050789;GO:0050794;GO:0051090;GO:0051091;GO:0051092;GO:0051171;GO:0051252;GO:0051603;GO:0060255;GO:…	GO:0003676;GO:0003723;GO:0003824;GO:0004175;GO:0005488;GO:0005515;GO:0008134;GO:0008233;GO:0016787;GO:0035639;GO:0043167;GO:0043168;GO:0051059;GO:0061629;GO:0097159;GO:0140096;GO:0140297;GO:1901265	GO:0000502;GO:0000932;GO:0005634;GO:0005654;GO:0005737;GO:0005829;GO:0005839;GO:0005844;GO:0016363;GO:0019773;GO:0030016;GO:0030017;GO:0031982;GO:0032991;GO:0035770;GO:0036464;GO:0043226;GO:0043227;GO:0043228;GO:0043229;GO:0043230;GO:0043231;GO:0043232;GO:0043292;GO:0065010;GO:0070062;GO:0099080;GO:0099081;GO:0099512;GO:0110165;GO:0140535;GO:1902494;GO:1903561;GO:1905368;GO:1905369;GO:1990904	1	11	12.7433	12.0939	12.8356	12.5117	14.0191	13.6877	13.066	13.2089	13.467	13.9931	13.1494	11.9745	12.3699	11.9077	13.3843	11.988	12.4977	12.8701	12.4777	14.0854	12.5249	13.137	12.8353	13.2863	12.4701	12.1221	12.7808	13.6633	17.2857	12.2636	13.7144	12.187	18.143	13.0144	12.6469
+	8.20875	2.14204	AAAVLAAESMVVTLAK[54.0106]	sp|Q13087|PDIA2_HUMAN	16K(54.0106)	Q13087	PDIA2_HUMAN	PDIA2	Protein disulfide-isomerase A2	GO:0006457;GO:0006621;GO:0006950;GO:0007155;GO:0009987;GO:0032507;GO:0033554;GO:0034109;GO:0034975;GO:0034976;GO:0035437;GO:0045185;GO:0050896;GO:0051179;GO:0051235;GO:0051651;GO:0051716;GO:0070527;GO:0072595;GO:0098609	GO:0003756;GO:0003824;GO:0005488;GO:0005496;GO:0008289;GO:0015035;GO:0015036;GO:0016491;GO:0016667;GO:0016853;GO:0016860;GO:0016864;GO:0097159;GO:0140096	GO:0005783;GO:0005788;GO:0031974;GO:0043226;GO:0043227;GO:0043229;GO:0043231;GO:0043233;GO:0070013;GO:0110165	84	99	17.8116	15.4609	16.8099	17.2869	18.4794	18.141	16.6525	14.8776	19.3832	16.0355	17.1564	16.3351	13.5433	12.2444	17.7752	12.2324	15.0213	11.9109	17.7666	15.7306	12.678	15.7429	16.0313	11.46	15.3011	12.95	17.0887	12.6572	16.6509	14.1422	12.5444	12.9041	17.6503	11.7152	13.4588
+	6.76176	2.13772	GTFSQLSELHCDK[54.0106]LHVDPENFR	sp|P02042|HBD_HUMAN	13K(54.0106)	P02042	HBD_HUMAN	HBD	Hemoglobin subunit delta	GO:0006810;GO:0008152;GO:0009056;GO:0009987;GO:0015669;GO:0015670;GO:0015671;GO:0019755;GO:0042743;GO:0042744;GO:0044237;GO:0044248;GO:0051179;GO:0051234;GO:0071702;GO:0071704;GO:0072593;GO:0098754;GO:0098869;GO:1901575;GO:1990748	GO:0005344;GO:0005488;GO:0005515;GO:0019825;GO:0020037;GO:0030492;GO:0031721;GO:0036094;GO:0043167;GO:0043169;GO:0043177;GO:0046872;GO:0046906;GO:0097159;GO:0140104	GO:0005829;GO:0005833;GO:0031838;GO:0032991;GO:0072562;GO:0110165	84	105	16.9671	16.9425	17.1527	17.0598	19.0112	17.5312	18.0982	16.8868	18.7156	16.9669	17.7298	13.2173	13.6828	14.869	16.165	10.7449	13.536	11.8434	18.211	19.7599	17.5439	13.5226	17.0152	17.2026	16.9457	12.2948	17.9346	14.7165	13.2193	12.4771	16.5453	9.79651	18.4424	10.5259	16.6708
+	8.79745	2.13697	LTDDVK[54.0106]KEK[54.0106]	sp|Q13435|SF3B2_HUMAN	6K(54.0106),9K(54.0106)	Q13435	SF3B2_HUMAN	SF3B2	Splicing factor 3B subunit 2	GO:0000245;GO:0000375;GO:0000377;GO:0000398;GO:0006139;GO:0006396;GO:0006397;GO:0006725;GO:0006807;GO:0008152;GO:0008380;GO:0009987;GO:0016043;GO:0016070;GO:0016071;GO:0022607;GO:0022618;GO:0034641;GO:0043170;GO:0043933;GO:0044237;GO:0044238;GO:0046483;GO:0065003;GO:0071704;GO:0071826;GO:0071840;GO:0090304;GO:1901360;GO:1903241	GO:0003676;GO:0003723;GO:0005488;GO:0097159	GO:0005634;GO:0005654;GO:0005681;GO:0005684;GO:0005686;GO:0005689;GO:0016604;GO:0016607;GO:0030532;GO:0032991;GO:0043226;GO:0043227;GO:0043229;GO:0043231;GO:0071005;GO:0071011;GO:0071013;GO:0097525;GO:0110165;GO:0120114;GO:0140513;GO:1902494;GO:1990904	395	403	17.1728	12.9028	17.2281	13.2956	17.9541	12.847	14.9244	12.7647	17.3029	12.2435	17.8405	13.1576	13.9326	12.0562	17.845	11.2925	14.4266	12.3141	18.297	12.3538	12.6836	15.0947	13.3913	17.7166	18.0253	11.9333	17.8594	12.614	16.494	13.6008	15.0995	17.2133	13.3691	11.9696	13.5688
+	8.76299	2.13186	PVR[54.0106]PDSAHK	sp|Q8WX93|PALLD_HUMAN	3R(54.0106)	Q8WX93	PALLD_HUMAN	PALLD	Palladin	GO:0000902;GO:0002064;GO:0003334;GO:0003382;GO:0006996;GO:0007010;GO:0007155;GO:0007156;GO:0007411;GO:0008037;GO:0008038;GO:0009653;GO:0009987;GO:0016043;GO:0016477;GO:0030029;GO:0030030;GO:0030036;GO:0031175;GO:0032502;GO:0048468;GO:0048856;GO:0048869;GO:0048870;GO:0070593;GO:0071840;GO:0097485;GO:0098609;GO:0098742;GO:0120036	GO:0003779;GO:0005488;GO:0005515;GO:0008092;GO:0042805;GO:0050839;GO:0051371;GO:0051393;GO:0098631;GO:0098632	GO:0001725;GO:0001726;GO:0002102;GO:0005634;GO:0005739;GO:0005829;GO:0005856;GO:0005884;GO:0005886;GO:0005925;GO:0015629;GO:0016020;GO:0030018;GO:0030027;GO:0030054;GO:0030055;GO:0030424;GO:0030426;GO:0030427;GO:0032432;GO:0042641;GO:0042995;GO:0043005;GO:0043226;GO:0043227;GO:0043228;GO:0043229;GO:0043231;GO:0043232;GO:0045202;GO:0060076;GO:0070161;GO:0097517;GO:0099080;GO:0099081;GO:0099512;GO:…	1174	1182	16.9975	14.8026	17.1505	12.0331	13.2368	14.1293	12.9555	12.7446	18.9572	13.9873	17.7725	13.3685	13.1408	13.8904	17.5727	15.5876	17.0976	14.5185	18.5253	13.8282	11.4207	13.9294	18.2442	17.6014	18.0471	12.2906	12.5746	13.6737	17.5335	16.9776	18.0101	14.5502	12.8394	12.1955	18.0474
+	16.945	2.12921	SDLEIELLK[54.0106]R[54.0106]QQK[54.0106]	sp|Q9H098|F107B_HUMAN	10R(54.0106),13K(54.0106),9K(54.0106)	Q9H098	F107B_HUMAN	FAM107B	Protein FAM107B				78	90	15.4222	12.2723	12.9476	14.0278	13.9433	14.065	14.5483	12.6334	16.0434	13.2494	13.0698	12.2298	16.8151	12.6098	16.077	15.4624	13.5299	11.6205	16.3453	15.0498	11.8948	13.8919	13.6211	12.9961	15.4529	12.1155	15.3765	13.1909	16.5442	12.9117	12.6792	12.9742	15.7586	12.3392	13.4334
+	3.97633	2.11752	K[54.0106]LRAELR[54.0106]K[54.0106]	sp|B1AJZ9|FHAD1_HUMAN	1K(54.0106),7R(54.0106),8K(54.0106)	B1AJZ9	FHAD1_HUMAN	FHAD1	Forkhead-associated domain-containing protein 1				431	438	13.5427	13.2511	12.632	13.475	14.7703	11.5993	13.8993	13.9942	15.3892	12.1686	13.4683	12.8441	12.9912	13.1562	13.5931	12.495	12.3415	12.5717	18.4129	14.6354	13.3811	13.8014	12.4488	13.3682	18.8949	12.4901	12.7034	11.9746	12.3452	12.2359	13.1959	12.3186	21.7216	12.8458	21.2651
+	7.33376	2.1169	QLEESK[54.0106]TK	sp|Q03001|DYST_HUMAN	6K(54.0106)	Q03001	DYST_HUMAN	DST	Dystonin	GO:0000226;GO:0006810;GO:0006950;GO:0006996;GO:0007010;GO:0007017;GO:0007018;GO:0007044;GO:0007155;GO:0007163;GO:0007165;GO:0007166;GO:0007229;GO:0008088;GO:0008090;GO:0009611;GO:0009987;GO:0010970;GO:0016043;GO:0022607;GO:0030011;GO:0030705;GO:0031581;GO:0034329;GO:0034330;GO:0042060;GO:0045103;GO:0045104;GO:0046907;GO:0048870;GO:0050789;GO:0050794;GO:0050896;GO:0051179;GO:0051234;GO:0051641;GO:…	GO:0003779;GO:0005102;GO:0005178;GO:0005198;GO:0005488;GO:0005509;GO:0005515;GO:0008017;GO:0008092;GO:0015631;GO:0042802;GO:0042803;GO:0043167;GO:0043169;GO:0044877;GO:0046872;GO:0046983;GO:0050839;GO:0051010	GO:0005604;GO:0005634;GO:0005635;GO:0005654;GO:0005737;GO:0005789;GO:0005829;GO:0005856;GO:0005882;GO:0005925;GO:0005938;GO:0009925;GO:0015629;GO:0015630;GO:0016020;GO:0030018;GO:0030054;GO:0030055;GO:0030056;GO:0030312;GO:0030424;GO:0031012;GO:0031090;GO:0031252;GO:0031410;GO:0031673;GO:0031967;GO:0031975;GO:0031982;GO:0032838;GO:0035371;GO:0042995;GO:0043005;GO:0043226;GO:0043227;GO:0043228;GO:…	3771	3778	12.1205	14.796	18.5027	13.1272	18.2759	12.4537	18.2871	12.6072	18.7346	13.3452	13.4736	17.3105	11.9863	12.0695	18.0746	12.6659	16.4581	12.1503	16.8076	13.7985	11.7627	13.5934	18.7233	12.9234	12.6591	12.497	15.9109	12.2445	16.3726	14.0755	13.4295	12.7885	13.8287	13.3501	17.7429
+	15.4085	2.11095	ISEK[54.0106]KKIAEK[54.0106]	sp|O75822|EIF3J_HUMAN	10K(54.0106),4K(54.0106)	O75822	EIF3J_HUMAN	EIF3J	Eukaryotic translation initiation factor 3 subunit J	GO:0001732;GO:0006413;GO:0008152;GO:0009987;GO:0016043;GO:0022607;GO:0022618;GO:0043933;GO:0044237;GO:0065003;GO:0071826;GO:0071840	GO:0003676;GO:0003743;GO:0005488;GO:0005515;GO:0008135;GO:0042802;GO:0045182;GO:0090079;GO:0097159	GO:0005829;GO:0005852;GO:0016282;GO:0032991;GO:0033290;GO:0070993;GO:0110165;GO:1990904	71	80	15.7536	12.4729	14.5441	12.9373	15.7407	13.0641	16.5157	12.7816	15.8436	13.0248	15.4874	12.189	13.3137	12.2327	14.6298	12.663	15.2197	12.5258	14.1932	13.0458	11.7969	13.208	13.6124	12.0773	14.4677	12.1923	14.18	11.9993	15.5074	12.9516	12.488	12.9411	14.9801	12.5533	12.5366
+	8.94578	2.10969	K[54.0106]GISDLVLK	sp|P28288|ABCD3_HUMAN	1K(54.0106)	P28288	ABCD3_HUMAN	ABCD3	ATP-binding cassette sub-family D member 3	GO:0000038;GO:0001676;GO:0006082;GO:0006629;GO:0006631;GO:0006633;GO:0006635;GO:0006694;GO:0006699;GO:0006810;GO:0006869;GO:0006996;GO:0007031;GO:0008152;GO:0008202;GO:0008206;GO:0008610;GO:0009056;GO:0009058;GO:0009062;GO:0009410;GO:0009987;GO:0010033;GO:0014070;GO:0015711;GO:0015718;GO:0015721;GO:0015849;GO:0015850;GO:0015908;GO:0015909;GO:0015910;GO:0015919;GO:0016042;GO:0016043;GO:0016053;GO:…	GO:0000166;GO:0003824;GO:0005215;GO:0005319;GO:0005324;GO:0005488;GO:0005515;GO:0005524;GO:0015399;GO:0016289;GO:0016462;GO:0016787;GO:0016788;GO:0016790;GO:0016817;GO:0016818;GO:0016887;GO:0017076;GO:0017111;GO:0022804;GO:0022857;GO:0030554;GO:0032553;GO:0032555;GO:0032559;GO:0035639;GO:0036094;GO:0042626;GO:0042802;GO:0042803;GO:0043167;GO:0043168;GO:0043621;GO:0046983;GO:0047617;GO:0097159;GO:…	GO:0005739;GO:0005777;GO:0005778;GO:0005782;GO:0005829;GO:0016020;GO:0031090;GO:0031903;GO:0031907;GO:0031974;GO:0042579;GO:0043226;GO:0043227;GO:0043229;GO:0043231;GO:0043233;GO:0070013;GO:0098588;GO:0110165	535	543	13.5708	16.9358	12.3959	12.8997	13.9495	12.6263	16.4885	12.1406	12.7626	12.731	15.1045	12.7448	12.44	12.6672	13.7171	11.9025	15.615	12.3209	15.3183	14.1558	12.7439	12.9781	17.008	12.8643	15.8855	12.8802	14.582	12.4382	17.5231	13.1894	16.6751	12.8574	17.6062	13.476	18.0605
+	6.68157	2.10655	LQK[54.0106]VLAK[54.0106]LPLAEEEK[54.0106]	sp|Q9Y6F6|IRAG1_HUMAN	15K(54.0106),3K(54.0106),7K(54.0106)	Q9Y6F6	IRAG1_HUMAN	IRAG1	Inositol 1,4,5-triphosphate receptor associated 1	GO:0007165;GO:0009987;GO:0019932;GO:0019934;GO:0019935;GO:0035556;GO:0050789;GO:0050794;GO:0065007		GO:0005783;GO:0005789;GO:0016020;GO:0016529;GO:0031090;GO:0031095;GO:0043226;GO:0043227;GO:0043229;GO:0043231;GO:0048471;GO:0098588;GO:0110165	398	412	17.2941	12.2221	16.1954	16.7204	17.871	13.6251	18.4005	16.2853	17.8633	13.1681	17.7825	12.078	12.3661	12.41	15.4237	12.6628	17.1336	11.7645	17.2518	20.5619	12.6891	14.3277	18.4207	18.5576	17.3056	15.3185	16.7076	19.5072	17.3207	16.9973	17.1627	13.9952	21.068	13.5416	20.1739
+	3.49477	2.10109	PGEGAPPGVLPSSRIR[54.0106]HR[54.0106]	sp|Q9HB19|PKHA2_HUMAN	16R(54.0106),18R(54.0106)	Q9HB19	PKHA2_HUMAN	PLEKHA2	Pleckstrin homology domain-containing family A member 2	GO:0001952;GO:0001954;GO:0010810;GO:0010811;GO:0030155;GO:0045785;GO:0048518;GO:0048522;GO:0050789;GO:0050794;GO:0065007	GO:0001968;GO:0005488;GO:0005515;GO:0008289;GO:0019904;GO:0030165;GO:0043167;GO:0043168;GO:0043236;GO:0043325;GO:0050840	GO:0005634;GO:0005737;GO:0005886;GO:0016020;GO:0032991;GO:0043226;GO:0043227;GO:0043229;GO:0043231;GO:0110165	383	400	13.1866	13.435	13.1674	14.4707	13.165	13.8588	23.4349	12.7326	16.001	13.3751	14.1527	12.2767	13.187	12.8766	14.116	12.9404	12.9954	11.8141	14.3374	16.8674	11.91	12.5236	12.4449	11.8621	13.2604	12.0812	21.2045	12.8876	12.3801	13.2995	12.9893	11.8205	15.267	12.1373	12.8216
+	6.24247	2.09626	VQGLVISQMLRKSVETR[54.0106]	sp|Q9UID3|VPS51_HUMAN	17R(54.0106)	Q9UID3	VPS51_HUMAN	VPS51	Vacuolar protein sorting-associated protein 51 homolog	GO:0006605;GO:0006810;GO:0006869;GO:0006914;GO:0006996;GO:0007030;GO:0007034;GO:0007041;GO:0008104;GO:0008152;GO:0009056;GO:0009653;GO:0009887;GO:0009987;GO:0015850;GO:0015918;GO:0016043;GO:0016192;GO:0016197;GO:0016482;GO:0030301;GO:0032365;GO:0032366;GO:0032367;GO:0032456;GO:0032502;GO:0033036;GO:0042147;GO:0044237;GO:0044248;GO:0045184;GO:0046907;GO:0048193;GO:0048854;GO:0051179;GO:0051234;GO:…		GO:0000938;GO:0005730;GO:0005768;GO:0005794;GO:0005829;GO:0016020;GO:0031090;GO:0031410;GO:0031982;GO:0032588;GO:0032991;GO:0043226;GO:0043227;GO:0043228;GO:0043229;GO:0043231;GO:0043232;GO:0055037;GO:0097708;GO:0099023;GO:0110165;GO:1990745	582	598	12.3444	13.6261	19.7065	12.9848	19.446	12.9613	18.5961	12.797	14.6656	13.1348	18.8704	12.716	12.939	12.3949	19.3555	11.9172	11.9406	11.5988	18.9973	18.8399	12.8123	12.6048	13.6787	12.9646	18.6973	12.5488	18.3443	13.7897	18.8281	17.7565	17.6175	17.3572	13.4365	12.7877	13.1639
+	8.33663	2.0849	GDGGK[54.0106]M[15.9949]AAAGALER	sp|Q12769|NU160_HUMAN	5K(54.0106),6M(15.9949)	Q12769	NU160_HUMAN	NUP160	Nuclear pore complex protein Nup160	GO:0006405;GO:0006406;GO:0006810;GO:0006913;GO:0008104;GO:0009987;GO:0015031;GO:0015931;GO:0032502;GO:0033036;GO:0045184;GO:0046907;GO:0048856;GO:0050657;GO:0050658;GO:0051028;GO:0051168;GO:0051169;GO:0051179;GO:0051234;GO:0051236;GO:0051641;GO:0051649;GO:0070727;GO:0071702;GO:0071705;GO:0072006	GO:0005198;GO:0017056	GO:0005635;GO:0005643;GO:0005829;GO:0031080;GO:0031967;GO:0031975;GO:0032991;GO:0110165;GO:0140513	30	43	19.4291	21.2236	20.6312	20.0515	22.243	20.2752	21.5153	19.0085	22.4389	19.7074	21.3148	19.572	19.0364	16.1334	21.4521	18.8609	20.0482	16.1872	21.6731	19.7046	12.5294	20.3199	19.6368	20.7899	19.5732	14.701	20.9108	17.5852	20.9668	17.6885	20.2723	18.0018	19.5152	18.3927	19.4746
+	10.3501	2.08064	AR[54.0106]PEVNLKK	sp|P24043|LAMA2_HUMAN	2R(54.0106)	P24043	LAMA2_HUMAN	LAMA2	Laminin subunit alpha-2	GO:0001894;GO:0007155;GO:0007411;GO:0007517;GO:0009966;GO:0009967;GO:0009987;GO:0010001;GO:0010646;GO:0010647;GO:0014037;GO:0016043;GO:0023051;GO:0023056;GO:0030030;GO:0030154;GO:0030155;GO:0030334;GO:0031175;GO:0032222;GO:0032224;GO:0032501;GO:0032502;GO:0035633;GO:0040012;GO:0042592;GO:0045595;GO:0045597;GO:0045785;GO:0045995;GO:0048513;GO:0048518;GO:0048522;GO:0048583;GO:0048584;GO:0048856;GO:…	GO:0005102;GO:0005198;GO:0005488;GO:0005515	GO:0005576;GO:0005604;GO:0005886;GO:0016020;GO:0030054;GO:0030312;GO:0031012;GO:0031594;GO:0032991;GO:0042383;GO:0042995;GO:0043005;GO:0043083;GO:0043197;GO:0044309;GO:0045202;GO:0062023;GO:0098636;GO:0098637;GO:0098794;GO:0110165;GO:0120025	2483	2491	16.6823	17.4185	16.5839	17.0641	16.6845	16.5927	17.8937	17.0098	19.0903	16.3126	17.68	15.4835	13.8369	13.1197	17.9519	14.7402	15.7969	12.9393	18.1663	20.3884	18.822	16.9588	18.4044	20.1541	17.2042	13.0606	17.6058	16.3152	17.8026	16.6854	16.9747	12.7337	19.2454	14.0845	17.2005
+	8.96666	2.07425	LSQEDPDYGIR[54.0106]	sp|P04040|CATA_HUMAN	11R(54.0106)	P04040	CATA_HUMAN	CAT	Catalase	GO:0000302;GO:0001649;GO:0001657;GO:0001666;GO:0006066;GO:0006091;GO:0006629;GO:0006638;GO:0006639;GO:0006641;GO:0006807;GO:0006950;GO:0006979;GO:0007584;GO:0008152;GO:0008202;GO:0008203;GO:0009056;GO:0009060;GO:0009314;GO:0009410;GO:0009411;GO:0009416;GO:0009605;GO:0009628;GO:0009642;GO:0009650;GO:0009719;GO:0009725;GO:0009743;GO:0009888;GO:0009987;GO:0009991;GO:0010033;GO:0010035;GO:0010038;GO:…	GO:0000166;GO:0003824;GO:0004046;GO:0004096;GO:0004601;GO:0005488;GO:0005515;GO:0016209;GO:0016491;GO:0016684;GO:0016787;GO:0016810;GO:0016811;GO:0017076;GO:0019899;GO:0020037;GO:0030554;GO:0036094;GO:0042802;GO:0042803;GO:0043167;GO:0043169;GO:0046872;GO:0046906;GO:0046983;GO:0050661;GO:0097159;GO:1901265;GO:1901363	GO:0005576;GO:0005737;GO:0005739;GO:0005777;GO:0005778;GO:0005782;GO:0005829;GO:0005925;GO:0016020;GO:0030054;GO:0030055;GO:0031090;GO:0031903;GO:0031907;GO:0031974;GO:0031982;GO:0031983;GO:0032991;GO:0034774;GO:0042579;GO:0043226;GO:0043227;GO:0043229;GO:0043230;GO:0043231;GO:0043233;GO:0060205;GO:0062151;GO:0065010;GO:0070013;GO:0070062;GO:0070161;GO:0098588;GO:0110165;GO:1902494;GO:1903561;GO:…	253	263	12.9933	13.2483	18.8562	12.151	14.5549	12.1071	13.2378	13.5252	13.4189	12.6124	13.5112	13.3743	13.5622	13.1928	13.6321	12.8527	13.6273	12.4716	12.573	13.7594	11.5865	13.9983	12.7928	13.1375	18.4545	12.6332	14.5421	13.2757	18.6811	13.5421	12.9298	12.5375	13.1433	13.187	13.0812
+	3.51801	2.07425	IKSR[54.0106]NAHMK[54.0106]R	sp|Q9H0D2|ZN541_HUMAN	4R(54.0106),9K(54.0106)	Q9H0D2	ZN541_HUMAN	ZNF541	Zinc finger protein 541	GO:0000280;GO:0003006;GO:0006355;GO:0006357;GO:0006996;GO:0007140;GO:0007276;GO:0007283;GO:0009889;GO:0009890;GO:0009891;GO:0009892;GO:0009893;GO:0009987;GO:0010468;GO:0010556;GO:0010557;GO:0010558;GO:0010604;GO:0010605;GO:0016043;GO:0019219;GO:0019222;GO:0022402;GO:0022412;GO:0022414;GO:0030154;GO:0031323;GO:0031324;GO:0031325;GO:0031326;GO:0031327;GO:0031328;GO:0032502;GO:0045892;GO:0045893;GO:…	GO:0003712;GO:0003714;GO:0005488;GO:0043167;GO:0043169;GO:0046872;GO:0140110	GO:0000118;GO:0005634;GO:0005667;GO:0032991;GO:0043226;GO:0043227;GO:0043229;GO:0043231;GO:0110165;GO:0140513;GO:1902494	1301	1310	13.4718	14.2946	20.0026	13.5114	13.4386	12.5005	20.9517	19.9043	22.1658	13.1015	13.718	13.0256	13.257	13.2721	21.1107	13.7138	11.9991	12.4189	21.9245	23.6319	10.8604	13.9162	12.9772	21.2565	20.5609	14.1125	20.6687	18.7436	18.9177	17.6825	17.1333	15.3224	22.6373	12.2806	12.5743
+	3.60417	2.07386	VRETIEALR[54.0106]M[15.9949]AGIK[54.0106]	sp|Q9Y2G3|AT11B_HUMAN	10M(15.9949),14K(54.0106),9R(54.0106)	Q9Y2G3	AT11B_HUMAN	ATP11B	Phospholipid-transporting ATPase IF	GO:0006810;GO:0006811;GO:0006869;GO:0009987;GO:0015748;GO:0015914;GO:0015917;GO:0016043;GO:0034204;GO:0034220;GO:0045332;GO:0051179;GO:0051234;GO:0055085;GO:0061024;GO:0065007;GO:0065008;GO:0071702;GO:0071705;GO:0071840;GO:0097035	GO:0000166;GO:0000287;GO:0003824;GO:0005215;GO:0005319;GO:0005488;GO:0005524;GO:0005548;GO:0015075;GO:0016462;GO:0016787;GO:0016817;GO:0016818;GO:0016887;GO:0017076;GO:0017111;GO:0022857;GO:0030554;GO:0032553;GO:0032555;GO:0032559;GO:0035639;GO:0036094;GO:0043167;GO:0043168;GO:0043169;GO:0046872;GO:0090555;GO:0090556;GO:0097159;GO:0097367;GO:0140303;GO:0140326;GO:0140327;GO:0140328;GO:0140333;GO:…	GO:0005637;GO:0005765;GO:0005768;GO:0005774;GO:0005783;GO:0005794;GO:0005886;GO:0010008;GO:0012506;GO:0016020;GO:0019866;GO:0030659;GO:0030667;GO:0031090;GO:0031410;GO:0031901;GO:0031965;GO:0031982;GO:0032991;GO:0035577;GO:0043226;GO:0043227;GO:0043229;GO:0043231;GO:0055037;GO:0055038;GO:0097708;GO:0098588;GO:0098852;GO:0110165;GO:1990351;GO:1990531	688	701	19.6297	13.2071	19.3097	13.0583	19.8606	17.9461	19.4667	12.5796	18.8369	12.5451	18.9387	13.8102	18.3784	16.5065	18.5611	11.7857	12.8124	12.7918	18.2932	12.5973	12.2054	14.4734	12.4531	12.418	11.4349	12.4126	18.7954	13.153	12.5099	12.6439	13.5277	16.5894	21.6088	12.9458	13.1317
+	5.38818	2.0697	K[54.0106]LM[15.9949]FPVGYGVPAVTVAISAASR[54.0106]	sp|Q9UHX3|AGRE2_HUMAN	1K(54.0106),22R(54.0106),3M(15.9949)	Q9UHX3	AGRE2_HUMAN	ADGRE2	Adhesion G protein-coupled receptor E2	GO:0002376;GO:0002682;GO:0002697;GO:0002703;GO:0002886;GO:0006935;GO:0006950;GO:0006952;GO:0006954;GO:0007155;GO:0007165;GO:0007166;GO:0007186;GO:0007188;GO:0007189;GO:0009987;GO:0016477;GO:0017157;GO:0030595;GO:0032879;GO:0040011;GO:0042330;GO:0043300;GO:0043304;GO:0048870;GO:0050789;GO:0050794;GO:0050896;GO:0050900;GO:0051046;GO:0051049;GO:0060326;GO:0060627;GO:0065007;GO:0071621;GO:0097529;GO:…	GO:0004888;GO:0004930;GO:0005488;GO:0005509;GO:0005539;GO:0035374;GO:0038023;GO:0043167;GO:0043169;GO:0046872;GO:0060089;GO:0097367;GO:1901681	GO:0005886;GO:0016020;GO:0031253;GO:0031256;GO:0032587;GO:0098590;GO:0110165	645	666	18.9888	19.0769	12.468	12.65	20.3168	14.0301	19.0792	12.6651	21.0013	13.749	19.3873	14.3658	13.0789	12.4348	12.4331	12.5367	13.0691	12.5323	13.3374	18.9572	12.7663	12.8706	13.9198	16.0293	12.5992	12.2953	13.319	12.2235	12.4973	13.0875	13.7612	12.849	18.3462	12.8992	12.7285
+	7.44651	2.06633	AHSSM[15.9949]VGVNLPHK[54.0106]	sp|P07205|PGK2_HUMAN	13K(54.0106),5M(15.9949)	P07205	PGK2_HUMAN	PGK2	Phosphoglycerate kinase 2	GO:0001539;GO:0003341;GO:0005975;GO:0005996;GO:0006006;GO:0006007;GO:0006082;GO:0006090;GO:0006091;GO:0006094;GO:0006096;GO:0006139;GO:0006163;GO:0006195;GO:0006725;GO:0006734;GO:0006735;GO:0006753;GO:0006793;GO:0006796;GO:0006807;GO:0007017;GO:0007018;GO:0008152;GO:0009056;GO:0009058;GO:0009117;GO:0009132;GO:0009134;GO:0009135;GO:0009137;GO:0009141;GO:0009144;GO:0009150;GO:0009154;GO:0009166;GO:…	GO:0000166;GO:0003824;GO:0004618;GO:0005488;GO:0005524;GO:0016301;GO:0016740;GO:0016772;GO:0016774;GO:0017076;GO:0030554;GO:0032553;GO:0032555;GO:0032559;GO:0035639;GO:0036094;GO:0043167;GO:0043168;GO:0043531;GO:0097159;GO:0097367;GO:1901265;GO:1901363	GO:0005634;GO:0005829;GO:0031982;GO:0035686;GO:0043226;GO:0043227;GO:0043229;GO:0043230;GO:0043231;GO:0065010;GO:0070062;GO:0110165;GO:1903561	172	184	17.4056	17.8058	17.0353	17.235	19.1356	18.8657	17.0098	17.5113	19.6624	15.5188	18.0495	16.1205	13.5777	12.1634	18.6703	13.0228	16.2688	11.5151	18.3198	14.0567	18.2758	18.3903	17.4734	16.5141	16.903	11.2582	17.3029	16.8179	17.101	16.0899	13.3914	14.3656	17.7522	12.8102	17.7577
+	9.75041	2.06416	LHAK[54.0106]AK[54.0106]LTSLNK	sp|Q14789|GOGB1_HUMAN	4K(54.0106),6K(54.0106)	Q14789	GOGB1_HUMAN	GOLGB1	Golgin subfamily B member 1	GO:0006355;GO:0006996;GO:0007030;GO:0008104;GO:0009889;GO:0009987;GO:0010468;GO:0010556;GO:0016043;GO:0019219;GO:0019222;GO:0031323;GO:0031326;GO:0033036;GO:0033365;GO:0044380;GO:0050789;GO:0050794;GO:0051171;GO:0051179;GO:0051252;GO:0051641;GO:0060255;GO:0065007;GO:0070727;GO:0071539;GO:0071840;GO:0072698;GO:0080090;GO:1905508;GO:1905793;GO:2001141	GO:0003676;GO:0003677;GO:0003723;GO:0005488;GO:0043565;GO:0097159	GO:0000139;GO:0005793;GO:0005794;GO:0005795;GO:0005801;GO:0005829;GO:0016020;GO:0031090;GO:0031984;GO:0043226;GO:0043227;GO:0043229;GO:0043231;GO:0098588;GO:0098791;GO:0110165	98	109	12.4412	13.6022	12.347	12.1523	16.9459	13.1331	16.644	13.3586	13.4732	12.8387	13.5936	12.8071	12.2566	13.0404	17.7652	12.7562	13.9136	12.6207	17.1992	13.4132	12.7592	12.6733	13.5048	13.1298	12.9234	12.7438	16.4853	13.252	19.3981	13.3618	13.2832	12.6264	15.3569	12.3547	13.4972
+	9.37062	2.05295	KSPFGGLGTM[15.9949]K[54.0106]	sp|O15417|TNC18_HUMAN	10M(15.9949),11K(54.0106)	O15417	TNC18_HUMAN	TNRC18	Trinucleotide repeat-containing gene 18 protein		GO:0003682;GO:0005488;GO:0044877	GO:0005654;GO:0005739;GO:0005829;GO:0016020;GO:0031090;GO:0031965;GO:0043226;GO:0043227;GO:0043229;GO:0043231;GO:0110165	610	620	16.8859	13.3407	15.7527	12.381	17.0401	14.2665	15.8731	12.8358	14.6436	13.6957	16.5046	14.42	15.1977	12.434	16.73	12.7611	18.6846	12.3316	17.3335	13.1182	12.4228	13.9536	12.97	16.4248	17.2734	12.3976	17.7982	13.1656	16.7065	14.7045	18.2724	16.8437	17.4905	13.8111	12.7337
+	7.12158	2.05276	GLQVSIQGEAVAVR[54.0106]	sp|Q96PQ0|SORC2_HUMAN	14R(54.0106)	Q96PQ0	SORC2_HUMAN	SORCS2	VPS10 domain-containing receptor SorCS2	GO:0006810;GO:0006886;GO:0007165;GO:0007186;GO:0007218;GO:0008104;GO:0009987;GO:0010646;GO:0010648;GO:0015031;GO:0023051;GO:0023057;GO:0033036;GO:0045184;GO:0046907;GO:0048167;GO:0048519;GO:0048523;GO:0050789;GO:0050794;GO:0050804;GO:0050805;GO:0051179;GO:0051234;GO:0051641;GO:0051649;GO:0060292;GO:0065007;GO:0065008;GO:0070727;GO:0071702;GO:0071705;GO:0099177	GO:0001653;GO:0004888;GO:0004930;GO:0008188;GO:0008528;GO:0038023;GO:0060089	GO:0005829;GO:0010008;GO:0012506;GO:0016020;GO:0030659;GO:0031090;GO:0031901;GO:0042995;GO:0043005;GO:0043197;GO:0043204;GO:0043226;GO:0043227;GO:0043229;GO:0043231;GO:0044309;GO:0055038;GO:0097060;GO:0098588;GO:0098590;GO:0098794;GO:0098839;GO:0099634;GO:0110165;GO:0120025	782	795	12.7554	12.8729	12.175	13.1835	13.1839	13.4018	12.97	13.3968	13.9385	13.0835	12.6928	12.411	13.217	11.9858	20.4187	11.9104	13.2705	12.4187	12.1344	14.0944	12.765	12.4164	12.5343	12.6268	12.788	11.3703	14.0877	13.1376	12.9728	13.0993	12.1717	11.999	20.1008	13.5434	13.6931
+	10.9036	2.04722	K[54.0106]LLLSATSGEK	sp|Q9NW13|RBM28_HUMAN	1K(54.0106)	Q9NW13	RBM28_HUMAN	RBM28	RNA-binding protein 28	GO:0006139;GO:0006396;GO:0006397;GO:0006725;GO:0006807;GO:0008152;GO:0008380;GO:0009987;GO:0016070;GO:0016071;GO:0034641;GO:0043170;GO:0044237;GO:0044238;GO:0046483;GO:0071704;GO:0090304;GO:1901360	GO:0003676;GO:0003723;GO:0005488;GO:0097159	GO:0005681;GO:0005730;GO:0032991;GO:0043226;GO:0043228;GO:0043229;GO:0043232;GO:0110165;GO:0140513;GO:1990904	505	515	15.3343	16.317	13.4766	12.7326	18.0002	13.9922	17.0162	15.7824	17.1284	12.7547	17.2965	12.4602	14.3766	12.7526	16.825	11.9861	15.3391	11.4226	17.7066	19.1272	12.205	13.8716	13.6221	16.6103	14.8772	12.6788	16.1228	15.6937	16.0371	12.8815	15.9361	12.0388	17.5834	12.2843	16.9385
+	2.59648	2.03857	IR[54.0106]SSNFLVTQGYQVK[54.0106]LAGFELR	sp|Q8NB16|MLKL_HUMAN	15K(54.0106),2R(54.0106)	Q8NB16	MLKL_HUMAN	MLKL	Mixed lineage kinase domain-like protein	GO:0006950;GO:0006952;GO:0007165;GO:0007166;GO:0008219;GO:0009605;GO:0009607;GO:0009615;GO:0009987;GO:0012501;GO:0016043;GO:0022607;GO:0043207;GO:0043933;GO:0044419;GO:0050789;GO:0050794;GO:0050896;GO:0051259;GO:0051260;GO:0051607;GO:0051707;GO:0065003;GO:0065007;GO:0070206;GO:0070207;GO:0070266;GO:0071840;GO:0097300;GO:0097527;GO:0097528;GO:0098542;GO:0140546	GO:0000166;GO:0005488;GO:0005515;GO:0005524;GO:0017076;GO:0019899;GO:0019900;GO:0019901;GO:0030554;GO:0032553;GO:0032555;GO:0032559;GO:0035639;GO:0036094;GO:0042802;GO:0043167;GO:0043168;GO:0044877;GO:0097159;GO:0097367;GO:1901265;GO:1901363	GO:0005634;GO:0005737;GO:0005829;GO:0005886;GO:0016020;GO:0030054;GO:0043226;GO:0043227;GO:0043229;GO:0043231;GO:0110165	332	353	13.6745	13.2753	11.8417	13.4731	13.0161	13.6444	22.2227	12.8548	12.4651	13.4774	14.1486	13.5872	13.2398	12.2065	20.697	12.8791	12.9445	12.3428	12.647	12.7355	12.3384	12.6371	12.4899	13.2541	12.4137	11.6256	21.0568	12.1172	13.1451	12.2019	12.6948	12.0662	13.7025	11.3424	12.9101
+	6.8092	2.03139	ITHVHVHM[15.9949]R[54.0106]	sp|P22891|PROZ_HUMAN	8M(15.9949),9R(54.0106)	P22891	PROZ_HUMAN	PROZ	Vitamin K-dependent protein Z	GO:0006508;GO:0006807;GO:0007596;GO:0007599;GO:0008152;GO:0019538;GO:0032501;GO:0043170;GO:0044238;GO:0050817;GO:0050878;GO:0065007;GO:0065008;GO:0071704;GO:1901564	GO:0003824;GO:0004175;GO:0004252;GO:0005488;GO:0005509;GO:0008233;GO:0008236;GO:0016787;GO:0017171;GO:0043167;GO:0043169;GO:0046872;GO:0140096	GO:0005615;GO:0005788;GO:0005796;GO:0031974;GO:0031982;GO:0043226;GO:0043227;GO:0043230;GO:0043233;GO:0065010;GO:0070013;GO:0070062;GO:0110165;GO:1903561	244	252	13.8795	13.3132	12.149	13.0989	18.3331	13.0633	16.0521	13.4528	18.6326	12.1024	13.6251	13.708	13.8246	12.8621	17.4715	12.333	16.8804	11.5469	16.6472	19.5709	12.3237	13.5981	17.4364	12.1311	13.4067	12.2557	14.981	17.4706	12.3167	12.201	16.6369	11.5454	18.6926	12.6647	17.0661
+	6.60759	2.02868	LDLVKFYISK[54.0106]	sp|Q8IUH4|ZDH13_HUMAN	10K(54.0106)	Q8IUH4	ZDH13_HUMAN	ZDHHC13	Palmitoyltransferase ZDHHC13	GO:0009966;GO:0009967;GO:0010646;GO:0010647;GO:0023051;GO:0023056;GO:0043122;GO:0043123;GO:0048518;GO:0048522;GO:0048583;GO:0048584;GO:0050789;GO:0050794;GO:0065007;GO:1902531;GO:1902533	GO:0003824;GO:0005215;GO:0008324;GO:0015075;GO:0015095;GO:0015318;GO:0016409;GO:0016417;GO:0016740;GO:0016746;GO:0016747;GO:0019706;GO:0019707;GO:0022857;GO:0022890;GO:0046873;GO:0140096	GO:0000139;GO:0005783;GO:0012506;GO:0016020;GO:0030659;GO:0030660;GO:0031090;GO:0043226;GO:0043227;GO:0043229;GO:0043231;GO:0098588;GO:0110165	95	104	12.3082	12.9006	13.767	13.0435	13.018	13.4566	13.3238	12.1946	13.4012	13.0821	13.0183	12.0138	13.363	13.2757	20.8868	13.0533	13.6514	12.879	12.854	13.4482	12.781	11.9044	12.2614	11.4176	12.859	12.2925	12.6047	12.8549	13.2169	12.5748	12.4239	11.7676	20.8595	12.1467	12.8754
+	7.87185	2.02441	IMNGGIGGGPPPAK[54.0106]K	sp|Q6GQQ9|OTU7B_HUMAN	14K(54.0106)	Q6GQQ9	OTU7B_HUMAN	OTUD7B	OTU domain-containing protein 7B	GO:0000122;GO:0001701;GO:0001817;GO:0001818;GO:0002250;GO:0002251;GO:0002376;GO:0002385;GO:0006355;GO:0006357;GO:0006807;GO:0006955;GO:0007275;GO:0008152;GO:0009790;GO:0009792;GO:0009889;GO:0009890;GO:0009892;GO:0009966;GO:0009968;GO:0010468;GO:0010556;GO:0010558;GO:0010605;GO:0010629;GO:0010646;GO:0010648;GO:0016579;GO:0019219;GO:0019222;GO:0019538;GO:0023051;GO:0023057;GO:0031323;GO:0031324;GO:…	GO:0003676;GO:0003677;GO:0003824;GO:0004843;GO:0005488;GO:0005515;GO:0008233;GO:0008234;GO:0008270;GO:0016787;GO:0019783;GO:0031593;GO:0043167;GO:0043169;GO:0046872;GO:0046914;GO:0070530;GO:0097159;GO:0101005;GO:0140030;GO:0140096;GO:1990380	GO:0005634;GO:0005737;GO:0005829;GO:0043226;GO:0043227;GO:0043229;GO:0043231;GO:0110165	652	666	13.3425	17.8749	13.3748	12.7766	19.5783	11.6952	12.874	13.2658	19.3382	12.7447	18.3258	13.1675	14.1374	12.7648	18.5576	12.7536	13.1445	11.9457	18.8703	12.8425	12.3908	13.3035	12.8142	12.2956	17.3895	12.7321	18.2408	12.905	17.5596	12.6806	14.15	11.7693	20.413	11.7223	14.8324
+	6.07615	2.01539	EK[54.0106]ADNNQAPPGSIAQDCK[54.0106]K	sp|Q9NUL3|STAU2_HUMAN	18K(54.0106),2K(54.0106)	Q9NUL3	STAU2_HUMAN	STAU2	Double-stranded RNA-binding protein Staufen homolog 2	GO:0003006;GO:0006403;GO:0006810;GO:0006950;GO:0006979;GO:0007017;GO:0007018;GO:0007281;GO:0008088;GO:0008104;GO:0008298;GO:0009653;GO:0009887;GO:0009987;GO:0010646;GO:0010720;GO:0010770;GO:0010970;GO:0010975;GO:0010976;GO:0022412;GO:0022414;GO:0022603;GO:0022604;GO:0023051;GO:0030705;GO:0031344;GO:0031346;GO:0031503;GO:0032502;GO:0032956;GO:0032970;GO:0033036;GO:0033043;GO:0033554;GO:0034599;GO:…	GO:0003676;GO:0003723;GO:0003725;GO:0003729;GO:0005488;GO:0005515;GO:0008092;GO:0019894;GO:0019899;GO:0019900;GO:0019901;GO:0030544;GO:0031072;GO:0043021;GO:0043022;GO:0044877;GO:0051019;GO:0051087;GO:0097159	GO:0005730;GO:0005737;GO:0005783;GO:0005874;GO:0005886;GO:0010494;GO:0016020;GO:0030424;GO:0031090;GO:0031965;GO:0032838;GO:0032839;GO:0032991;GO:0035770;GO:0036464;GO:0042995;GO:0043005;GO:0043025;GO:0043198;GO:0043226;GO:0043227;GO:0043228;GO:0043229;GO:0043231;GO:0043232;GO:0044297;GO:0099080;GO:0099081;GO:0099512;GO:0099513;GO:0099568;GO:0110165;GO:0120025;GO:0120111;GO:1990124;GO:1990904	547	565	13.3194	12.8019	17.5769	13.3279	13.547	13.8819	13.9955	12.984	13.1038	13.2874	13.0252	12.4708	13.6734	12.853	11.9378	13.4937	13.5423	12.5425	13.2432	14.2779	11.1013	14.2828	18.0406	13.1171	13.0887	13.2744	13.467	11.7379	12.8128	12.1778	12.6747	12.6545	14.0008	11.9952	13.4866
+	9.06822	1.99143	K[54.0106]VSHVADTK	sp|Q9UNF1|MAGD2_HUMAN	1K(54.0106)	Q9UNF1	MAGD2_HUMAN	MAGED2	Melanoma-associated antigen D2	GO:0000122;GO:0003008;GO:0003014;GO:0003096;GO:0006355;GO:0006357;GO:0006810;GO:0006811;GO:0006812;GO:0006814;GO:0007565;GO:0009889;GO:0009890;GO:0009892;GO:0010468;GO:0010556;GO:0010558;GO:0010605;GO:0019219;GO:0019222;GO:0022414;GO:0030001;GO:0031323;GO:0031324;GO:0031326;GO:0031327;GO:0032501;GO:0044703;GO:0044706;GO:0045892;GO:0045934;GO:0048519;GO:0048523;GO:0050789;GO:0050794;GO:0051171;GO:…		GO:0005576;GO:0005634;GO:0005654;GO:0005730;GO:0005829;GO:0016020;GO:0031093;GO:0031974;GO:0031983;GO:0034774;GO:0043226;GO:0043227;GO:0043228;GO:0043229;GO:0043231;GO:0043232;GO:0043233;GO:0060205;GO:0070013;GO:0110165	125	133	12.146	15.8258	16.8372	16.1023	19.4053	16.0393	17.885	16.9963	19.7378	16.291	17.5254	17.8328	16.6204	15.4442	19.2188	17.3076	15.9751	12.2531	18.6274	20.5669	17.1212	16.3883	17.7568	20.2147	15.967	12.9445	17.826	15.0682	16.6624	14.3116	17.4228	12.5015	19.3404	16.8406	16.5526
+	8.0174	1.9905	ATLEM[15.9949]VNHEK[54.0106]	sp|P07197|NFM_HUMAN	10K(54.0106),5M(15.9949)	P07197	NFM_HUMAN	NEFM	Neurofilament medium polypeptide	GO:0006996;GO:0007010;GO:0009987;GO:0016043;GO:0022607;GO:0033693;GO:0045103;GO:0045104;GO:0045109;GO:0045110;GO:0071840;GO:0097435	GO:0005198;GO:0005200;GO:0005488;GO:0005515;GO:0008017;GO:0008092;GO:0015631	GO:0005622;GO:0005737;GO:0005856;GO:0005882;GO:0005883;GO:0016234;GO:0030424;GO:0042995;GO:0043005;GO:0043226;GO:0043228;GO:0043229;GO:0043232;GO:0045111;GO:0097418;GO:0099080;GO:0099081;GO:0099160;GO:0099512;GO:0099513;GO:0099571;GO:0110165;GO:0120025	159	168	16.9025	17.8461	12.8603	15.7234	19.0349	13.0524	18.6528	15.1895	19.6541	15.0423	17.7644	19.319	16.0949	15.5781	18.6689	14.6841	16.9875	15.4898	18.3244	21.0215	10.528	16.6714	18.4906	18.982	17.8447	15.7283	18.848	18.2064	18.1461	17.2513	17.6497	15.7943	20.1938	15.2322	17.8316
+	5.9027	1.98977	RYPAHLAR[54.0106]SSSR[54.0106]K	sp|Q9H773|DCTP1_HUMAN	12R(54.0106),8R(54.0106)	Q9H773	DCTP1_HUMAN	DCTPP1	dCTP pyrophosphatase 1	GO:0006139;GO:0006220;GO:0006244;GO:0006253;GO:0006259;GO:0006725;GO:0006753;GO:0006793;GO:0006796;GO:0006807;GO:0006950;GO:0007154;GO:0008152;GO:0009056;GO:0009117;GO:0009141;GO:0009143;GO:0009147;GO:0009149;GO:0009166;GO:0009211;GO:0009213;GO:0009219;GO:0009223;GO:0009262;GO:0009264;GO:0009394;GO:0009605;GO:0009987;GO:0009991;GO:0019439;GO:0019637;GO:0019692;GO:0031668;GO:0033554;GO:0034641;GO:…	GO:0000166;GO:0000287;GO:0003824;GO:0005488;GO:0005515;GO:0016462;GO:0016787;GO:0016817;GO:0016818;GO:0019103;GO:0032552;GO:0032556;GO:0036094;GO:0042802;GO:0043167;GO:0043169;GO:0046872;GO:0047429;GO:0047840;GO:0097159;GO:0097367;GO:1901265;GO:1901363	GO:0005634;GO:0005654;GO:0005739;GO:0005829;GO:0043226;GO:0043227;GO:0043229;GO:0043231;GO:0110165	128	140	21.8836	22.047	21.9688	21.3726	22.7289	22.1418	22.7162	21.9561	22.8421	21.2463	21.6312	20.8274	18.6442	17.015	22.2273	19.6629	19.4987	16.5373	22.2631	22.9348	21.9691	22.0428	20.5289	20.1343	20.7318	15.9876	21.8984	19.1029	20.9114	19.2924	19.3666	16.5416	21.8941	17.892	20.0718
+	10.2804	1.98044	K[54.0106]AQIQEM[15.9949]KK	sp|Q86WR0|CCD25_HUMAN	1K(54.0106),7M(15.9949)	Q86WR0	CCD25_HUMAN	CCDC25	Coiled-coil domain-containing protein 25	GO:0040012;GO:0040017;GO:0048518;GO:0048522;GO:0050789;GO:0050794;GO:0065007;GO:2000145;GO:2000147	GO:0003676;GO:0003677;GO:0005488;GO:0097159	GO:0005886;GO:0012505;GO:0016020;GO:0110165	160	168	13.0256	13.3874	12.8483	13.3551	14.1101	12.9759	14.1745	12.7925	14.1554	13.6036	12.8355	13.3737	12.9134	12.8037	18.1103	12.4971	12.9678	12.2074	12.2324	15.0716	11.786	12.6283	13.7997	12.0051	13.1901	12.4995	13.4611	13.0445	16.624	12.0413	14.0684	13.0394	18.833	12.6205	12.3373
+	5.59818	1.9767	IYLYLTK[54.0106]VGISPDKLR[54.0106]	sp|P41250|GARS_HUMAN	16R(54.0106),7K(54.0106)	P41250	GARS_HUMAN	GARS1	Glycine--tRNA ligase	GO:0000959;GO:0006082;GO:0006139;GO:0006399;GO:0006418;GO:0006426;GO:0006520;GO:0006725;GO:0006753;GO:0006793;GO:0006796;GO:0006807;GO:0008152;GO:0009058;GO:0009117;GO:0009165;GO:0009987;GO:0015959;GO:0015960;GO:0015965;GO:0015966;GO:0016070;GO:0018130;GO:0019438;GO:0019637;GO:0019752;GO:0034641;GO:0034654;GO:0034660;GO:0043038;GO:0043039;GO:0043170;GO:0043436;GO:0044237;GO:0044238;GO:0044249;GO:…	GO:0000166;GO:0003824;GO:0004081;GO:0004812;GO:0004820;GO:0005488;GO:0005515;GO:0005524;GO:0008796;GO:0016462;GO:0016740;GO:0016787;GO:0016817;GO:0016818;GO:0016874;GO:0016875;GO:0017076;GO:0030554;GO:0032553;GO:0032555;GO:0032559;GO:0035639;GO:0036094;GO:0042802;GO:0043167;GO:0043168;GO:0046983;GO:0097159;GO:0097367;GO:0140098;GO:0140101;GO:0140640;GO:1901265;GO:1901363	GO:0005737;GO:0005739;GO:0005759;GO:0005829;GO:0030141;GO:0030424;GO:0031410;GO:0031974;GO:0031982;GO:0042995;GO:0043005;GO:0043226;GO:0043227;GO:0043229;GO:0043230;GO:0043231;GO:0043233;GO:0065010;GO:0070013;GO:0070062;GO:0097708;GO:0099503;GO:0110165;GO:0120025;GO:1903561	413	428	13.2319	14.97	13.8737	13.2112	13.0344	13.9933	13.2403	13.1473	15.3085	12.7167	13.5931	12.7259	13.296	13.5774	18.4429	11.6547	12.1667	12.9161	12.4799	15.4087	11.2024	13.9219	12.9864	13.4074	18.5481	12.5573	17.3591	13.3156	19.806	20.7387	12.7766	17.2618	18.935	12.6818	12.4084
+	5.83834	1.96998	GMFR[54.0106]TVGQLYK[54.0106]	sp|P35579|MYH9_HUMAN	11K(54.0106),4R(54.0106)	P35579	MYH9_HUMAN	MYH9	Myosin-9	GO:0000212;GO:0000226;GO:0000768;GO:0001525;GO:0001667;GO:0001701;GO:0001767;GO:0001768;GO:0001778;GO:0002376;GO:0002521;GO:0002573;GO:0006508;GO:0006509;GO:0006807;GO:0006810;GO:0006887;GO:0006911;GO:0006949;GO:0006996;GO:0007009;GO:0007010;GO:0007017;GO:0007051;GO:0007155;GO:0007163;GO:0007165;GO:0007166;GO:0007229;GO:0007275;GO:0007520;GO:0008104;GO:0008152;GO:0008360;GO:0009790;GO:0009792;GO:…	GO:0000146;GO:0000166;GO:0003676;GO:0003723;GO:0003774;GO:0003779;GO:0005102;GO:0005178;GO:0005488;GO:0005515;GO:0005516;GO:0005524;GO:0008092;GO:0017076;GO:0019904;GO:0030554;GO:0030674;GO:0032553;GO:0032555;GO:0032559;GO:0035639;GO:0036094;GO:0042802;GO:0042803;GO:0043167;GO:0043168;GO:0043495;GO:0043531;GO:0044877;GO:0045296;GO:0046983;GO:0050839;GO:0051015;GO:0060090;GO:0097159;GO:0097367;GO:…	GO:0001725;GO:0001726;GO:0001772;GO:0001931;GO:0005634;GO:0005737;GO:0005819;GO:0005826;GO:0005829;GO:0005856;GO:0005886;GO:0005903;GO:0005911;GO:0005912;GO:0005925;GO:0009898;GO:0015629;GO:0016020;GO:0016459;GO:0016460;GO:0016604;GO:0030054;GO:0030055;GO:0030141;GO:0031252;GO:0031410;GO:0031594;GO:0031982;GO:0032154;GO:0032432;GO:0032982;GO:0032991;GO:0042641;GO:0042995;GO:0043226;GO:0043227;GO:…	641	651	13.0659	12.8322	17.5385	13.0444	12.981	13.9875	13.5006	12.9853	17.9288	13.1534	14.014	13.1221	14.1335	12.8	12.8033	12.3086	16.6296	12.4645	13.0413	14.2705	11.8169	13.7218	15.9824	17.8388	17.2955	13.335	13.5101	12.7886	17.3331	17.7998	17.5881	16.8277	17.9881	11.6246	17.7606
+	3.65334	1.96272	APAHHPAAISTAK[54.0106]FC[125.0477]IQEIEK[54.0106]	sp|Q5JTH9|RRP12_HUMAN	13K(54.0106),15C(125.0477),21K(54.0106)	Q5JTH9	RRP12_HUMAN	RRP12	RRP12-like protein	GO:0006139;GO:0006364;GO:0006396;GO:0006725;GO:0006807;GO:0008152;GO:0009987;GO:0016070;GO:0016072;GO:0034470;GO:0034641;GO:0034660;GO:0043170;GO:0044237;GO:0044238;GO:0046483;GO:0071704;GO:0090304;GO:1901360	GO:0003676;GO:0003723;GO:0005488;GO:0097159	GO:0005730;GO:0005829;GO:0005886;GO:0016020;GO:0031090;GO:0031965;GO:0043226;GO:0043227;GO:0043228;GO:0043229;GO:0043231;GO:0043232;GO:0110165	274	294	13.1789	12.6147	20.4223	14.2026	12.1739	14.4769	13.754	12.7399	13.1814	13.7763	20.5739	12.1209	13.7935	12.4656	20.7531	12.7531	13.7923	12.9052	20.9327	15.7636	13.083	13.4962	12.5125	21.2234	20.7739	11.4647	21.6251	13.8224	20.0573	21.1624	20.8749	12.372	19.9813	11.918	12.5129
+	8.18548	1.95969	LDQLTANSARLEVER[54.0106]	sp|P14136|GFAP_HUMAN	15R(54.0106)	P14136	GFAP_HUMAN	GFAP	Glial fibrillary acidic protein	GO:0003333;GO:0006810;GO:0006835;GO:0006865;GO:0006886;GO:0006950;GO:0006996;GO:0007010;GO:0008104;GO:0008152;GO:0008283;GO:0008284;GO:0009058;GO:0009059;GO:0009894;GO:0009987;GO:0010001;GO:0010467;GO:0010506;GO:0010624;GO:0010625;GO:0010646;GO:0010647;GO:0010720;GO:0010975;GO:0010977;GO:0014002;GO:0014009;GO:0014010;GO:0014013;GO:0014015;GO:0015031;GO:0015711;GO:0015740;GO:0015810;GO:0015849;GO:…	GO:0005102;GO:0005178;GO:0005198;GO:0005200;GO:0005488;GO:0005515;GO:0019899;GO:0019900;GO:0042802;GO:0044877;GO:0050839	GO:0005737;GO:0005829;GO:0005856;GO:0005882;GO:0042995;GO:0043226;GO:0043228;GO:0043229;GO:0043232;GO:0044297;GO:0045111;GO:0097386;GO:0097449;GO:0097450;GO:0098552;GO:0098562;GO:0098574;GO:0099080;GO:0099081;GO:0099512;GO:0099513;GO:0110165;GO:0120025	127	141	12.9106	14.3478	12.4691	13.6643	12.5437	13.2208	14.1419	12.759	15.0328	12.8328	12.9129	12.2884	12.8886	13.354	16.6926	12.0457	12.9965	11.7297	16.5797	14.6468	12.4116	13.3758	14.4772	11.6221	11.9322	12.0292	13.6329	12.3609	16.0517	12.7979	13.0406	11.8417	12.0704	12.9936	12.657
+	6.73478	1.94363	LPSRRER[54.0106]C[130.0791]QFTLK	sp|Q8NE86|MCU_HUMAN	7R(54.0106),8C(130.0791)	Q8NE86	MCU_HUMAN	MCU	Calcium uniporter protein, mitochondrial	GO:0002682;GO:0002684;GO:0002685;GO:0002687;GO:0002688;GO:0002690;GO:0002791;GO:0002793;GO:0006810;GO:0006811;GO:0006812;GO:0006816;GO:0006839;GO:0006851;GO:0006873;GO:0006874;GO:0007165;GO:0009987;GO:0010638;GO:0010646;GO:0010647;GO:0010817;GO:0010821;GO:0010822;GO:0016043;GO:0019722;GO:0019725;GO:0019932;GO:0022603;GO:0022607;GO:0023051;GO:0023056;GO:0030001;GO:0030003;GO:0030334;GO:0030335;GO:…	GO:0005215;GO:0005216;GO:0005261;GO:0005262;GO:0005488;GO:0005515;GO:0008324;GO:0015075;GO:0015085;GO:0015267;GO:0015291;GO:0015292;GO:0015318;GO:0022803;GO:0022804;GO:0022857;GO:0022890;GO:0042802;GO:0046873;GO:1901702	GO:0005739;GO:0005743;GO:0016020;GO:0019866;GO:0031090;GO:0031966;GO:0032991;GO:0034702;GO:0034703;GO:0034704;GO:0043226;GO:0043227;GO:0043229;GO:0043231;GO:0098796;GO:0098798;GO:0098800;GO:0110165;GO:1902495;GO:1990246;GO:1990351	90	102	17.4965	19.3012	17.2081	12.9791	19.3044	17.9273	18.6497	13.7207	19.1331	13.5018	18.3441	12.7792	13.06	13.9245	12.1517	14.3928	12.4264	15.5669	12.3542	18.9132	11.416	13.6736	17.6481	13.5358	12.4458	15.891	18.278	12.2174	17.6733	14.1283	17.5626	16.6736	18.9222	12.554	18.8463
+	4.44217	1.94332	PSVDTEGPALVEIDR[54.0106]	sp|Q96PC5|MIA2_HUMAN	15R(54.0106)	Q96PC5	MIA2_HUMAN	MIA2	Melanoma inhibitory activity protein 2	GO:0006810;GO:0006886;GO:0006888;GO:0008104;GO:0009306;GO:0009987;GO:0015031;GO:0016192;GO:0032527;GO:0032940;GO:0033036;GO:0033365;GO:0035459;GO:0035592;GO:0042953;GO:0044872;GO:0045184;GO:0046903;GO:0046907;GO:0048193;GO:0051179;GO:0051234;GO:0051641;GO:0051649;GO:0070727;GO:0070972;GO:0070973;GO:0071692;GO:0071702;GO:0071705;GO:0140352	GO:0008047;GO:0030234;GO:0038024;GO:0098772;GO:0140677	GO:0005783;GO:0005789;GO:0016020;GO:0031090;GO:0043226;GO:0043227;GO:0043229;GO:0043231;GO:0070971;GO:0110165	554	568	12.9589	13.2233	14.1486	12.8268	21.4723	14.7151	21.2206	12.6035	13.7416	12.2593	20.7131	12.0538	12.773	12.5841	20.7794	12.0374	12.543	11.2403	20.967	22.2166	12.3374	13.1352	13.3188	12.2206	20.3997	11.947	20.7978	12.8237	20.5903	20.5061	12.3368	12.8237	21.2388	12.3577	12.604
+	3.91482	1.93852	IEYQDGK[54.0106]FRLDSIIC[130.0791]VK[54.0106]	sp|O14508|SOCS2_HUMAN	15C(130.0791),17K(54.0106),7K(54.0106)	O14508	SOCS2_HUMAN	SOCS2	Suppressor of cytokine signaling 2	GO:0001558;GO:0006629;GO:0006644;GO:0006650;GO:0006661;GO:0006793;GO:0006796;GO:0006807;GO:0006810;GO:0007165;GO:0007166;GO:0007167;GO:0007169;GO:0007259;GO:0007589;GO:0007595;GO:0008152;GO:0008610;GO:0008654;GO:0009058;GO:0009719;GO:0009725;GO:0009966;GO:0009968;GO:0009987;GO:0010033;GO:0010646;GO:0010648;GO:0014070;GO:0016567;GO:0019538;GO:0019637;GO:0023051;GO:0023057;GO:0032355;GO:0032446;GO:…	GO:0005102;GO:0005126;GO:0005131;GO:0005159;GO:0005488;GO:0005515;GO:0008269;GO:0019207;GO:0030234;GO:0030674;GO:0035591;GO:0046935;GO:0051427;GO:0060090;GO:0098772	GO:0005737;GO:0005829;GO:0005942;GO:0032991;GO:0061695;GO:0098796;GO:0110165;GO:1902494;GO:1990234	97	113	18.7942	19.028	18.7708	13.396	19.608	18.8889	19.208	12.8671	19.4125	18.1014	18.9144	13.591	12.9084	12.3502	19.0441	12.4393	12.5086	11.7462	18.9569	20.0973	11.3288	13.0733	12.724	12.6228	11.9477	11.7613	19.3099	18.1308	12.5569	12.115	13.0518	13.0199	19.0973	11.7381	13.4682
+	2.85709	1.92143	ASLEGQLR[54.0106]VQR[54.0106]EETEVLEASLCSLR[54.0106]	sp|Q9H5N1|RABE2_HUMAN	11R(54.0106),25R(54.0106),8R(54.0106)	Q9H5N1	RABE2_HUMAN	RABEP2	Rab GTPase-binding effector protein 2	GO:0006810;GO:0006897;GO:0008104;GO:0009987;GO:0015031;GO:0016043;GO:0016192;GO:0030030;GO:0031344;GO:0033036;GO:0033043;GO:0044087;GO:0045184;GO:0050789;GO:0050794;GO:0051128;GO:0051179;GO:0051234;GO:0051641;GO:0060491;GO:0065007;GO:0070727;GO:0071702;GO:0071705;GO:0071840;GO:0098657;GO:0120032;GO:0120035;GO:1902017;GO:1902115	GO:0005096;GO:0005102;GO:0005488;GO:0005515;GO:0008047;GO:0008083;GO:0030234;GO:0030545;GO:0030546;GO:0030695;GO:0048018;GO:0060589;GO:0098772;GO:0140677	GO:0005768;GO:0005769;GO:0005813;GO:0005815;GO:0005829;GO:0031410;GO:0031982;GO:0036064;GO:0043226;GO:0043227;GO:0043229;GO:0043231;GO:0097708;GO:0110165	461	485	13.5148	13.8797	13.1766	12.5762	13.9601	13.026	13.7425	20.9545	13.7783	12.2096	13.3518	13.0975	13.2552	12.8324	21.4481	12.6255	13.402	12.0772	21.6139	13.3261	11.9449	12.4341	20.9509	12.1427	13.1916	19.0173	13.0856	20.3683	21.2986	21.0293	20.8589	12.8107	21.835	14.0568	21.1428
+	3.21237	1.91867	AKDPPAGTR[54.0106]K	sp|P03314|POLG_YEFV1	9R(54.0106)	P03314	POLG_YEFV1		Genome polyprotein				2870	2879	16.9534	13.8764	18.6146	12.5203	19.6204	18.347	19.6305	16.744	13.4425	13.7238	18.6399	19.5653	19.0972	19.6335	19.2904	19.1432	19.0471	18.6255	17.0687	14.6203	12.1557	12.6833	17.8582	18.3383	19.8211	15.0307	19.7294	17.3565	21.124	18.0851	19.8973	18.4284	12.5215	12.5938	12.9672
+	3.48929	1.91756	NDK[54.0106]RSGFGVSER[54.0106]	sp|Q9BR39|JPH2_HUMAN	12R(54.0106),3K(54.0106)	Q9BR39	JPH2_HUMAN	JPH2	Junctophilin-2	GO:0006810;GO:0006811;GO:0006812;GO:0006816;GO:0007204;GO:0009987;GO:0010959;GO:0016202;GO:0022898;GO:0030001;GO:0032409;GO:0032411;GO:0032412;GO:0032414;GO:0032879;GO:0034220;GO:0034762;GO:0034764;GO:0034765;GO:0034767;GO:0042592;GO:0043269;GO:0043270;GO:0044093;GO:0048518;GO:0048522;GO:0048634;GO:0048878;GO:0050789;GO:0050793;GO:0050794;GO:0050801;GO:0051049;GO:0051050;GO:0051179;GO:0051234;GO:…	GO:0000981;GO:0001217;GO:0001227;GO:0001786;GO:0003676;GO:0003677;GO:0003700;GO:0005488;GO:0005543;GO:0005546;GO:0005547;GO:0008289;GO:0010314;GO:0032266;GO:0035091;GO:0043167;GO:0043168;GO:0070273;GO:0070300;GO:0072341;GO:0080025;GO:0097159;GO:0140110;GO:1901981;GO:1902936	GO:0005634;GO:0005783;GO:0005789;GO:0005886;GO:0014701;GO:0016020;GO:0016529;GO:0030018;GO:0030314;GO:0031090;GO:0032991;GO:0033017;GO:0043226;GO:0043227;GO:0043229;GO:0043231;GO:0098588;GO:0110165	297	308	12.745	13.2218	13.3315	12.1751	13.1765	13.5918	13.2285	11.8986	13.7798	12.6597	13.5452	13.0969	13.3517	13.353	13.8978	11.5832	12.597	11.8566	13.8864	13.8399	12.4416	12.7026	22.2116	13.3811	11.9892	12.7617	12.8321	21.216	13.0702	11.695	23.5301	12.9991	19.0436	11.5956	22.8391
+	8.5052	1.91057	LVEM[15.9949]ASSLAIR[54.0106]	sp|Q9Y4A5|TRRAP_HUMAN	11R(54.0106),4M(15.9949)	Q9Y4A5	TRRAP_HUMAN	TRRAP	Transformation/transcription domain-associated protein	GO:0000018;GO:0006139;GO:0006259;GO:0006281;GO:0006282;GO:0006325;GO:0006355;GO:0006357;GO:0006725;GO:0006807;GO:0006950;GO:0006974;GO:0008152;GO:0009889;GO:0009891;GO:0009893;GO:0009987;GO:0010468;GO:0010556;GO:0010557;GO:0010569;GO:0010604;GO:0016043;GO:0019219;GO:0019222;GO:0031323;GO:0031325;GO:0031326;GO:0031328;GO:0033554;GO:0034641;GO:0042981;GO:0043067;GO:0043170;GO:0043484;GO:0043933;GO:…	GO:0003712;GO:0140110	GO:0000118;GO:0000123;GO:0000124;GO:0000786;GO:0000812;GO:0005634;GO:0005654;GO:0005667;GO:0005794;GO:0031248;GO:0032991;GO:0032993;GO:0033276;GO:0035267;GO:0043189;GO:0043226;GO:0043227;GO:0043229;GO:0043231;GO:0070461;GO:0070603;GO:0090575;GO:0097346;GO:0110165;GO:0140513;GO:0140535;GO:1902493;GO:1902494;GO:1902562;GO:1904949;GO:1905368;GO:1990234	2907	2917	13.1624	18.2132	13.446	11.735	15.7714	15.0224	16.1533	11.3155	16.8848	12.2946	18.2398	13.6044	14.116	13.0352	16.0495	12.3448	15.4245	10.5223	16.3386	17.4502	13.7757	14.2686	16.5351	13.1549	13.4546	12.773	16.4481	17.1835	17.7541	16.7774	16.0065	12.5679	16.1653	15.4556	16.8881
+	6.77236	1.8961	QIFIGPPDIK[54.0106]	sp|Q9Y4W6|AFG32_HUMAN	10K(54.0106)	Q9Y4W6	AFG32_HUMAN	AFG3L2	AFG3-like protein 2	GO:0006508;GO:0006807;GO:0006810;GO:0006811;GO:0006812;GO:0006816;GO:0006839;GO:0006851;GO:0006873;GO:0006874;GO:0006996;GO:0007005;GO:0007006;GO:0007007;GO:0007272;GO:0007409;GO:0007528;GO:0008053;GO:0008152;GO:0008366;GO:0009605;GO:0009653;GO:0009987;GO:0016043;GO:0016485;GO:0016540;GO:0019538;GO:0019725;GO:0021675;GO:0030001;GO:0030003;GO:0030030;GO:0032502;GO:0032989;GO:0033619;GO:0034220;GO:…	GO:0000166;GO:0003824;GO:0004175;GO:0004176;GO:0004222;GO:0005488;GO:0005515;GO:0005524;GO:0008233;GO:0008237;GO:0008270;GO:0016462;GO:0016787;GO:0016817;GO:0016818;GO:0016887;GO:0017076;GO:0017111;GO:0030554;GO:0032553;GO:0032555;GO:0032559;GO:0035639;GO:0036094;GO:0043167;GO:0043168;GO:0043169;GO:0046872;GO:0046914;GO:0051082;GO:0097159;GO:0097367;GO:0140096;GO:0140657;GO:1901265;GO:1901363	GO:0005739;GO:0005743;GO:0005745;GO:0016020;GO:0019866;GO:0031090;GO:0031966;GO:0032991;GO:0043226;GO:0043227;GO:0043229;GO:0043231;GO:0098796;GO:0098798;GO:0098800;GO:0110165;GO:1902494;GO:1905368	472	481	13.9758	13.4214	14.3067	13.6781	19.158	13.65	18.5999	17.2554	13.1053	16.5756	17.8752	13.1592	13.6831	13.0341	18.0705	13.1488	11.8331	11.8004	14.4395	20.4766	12.6199	14.232	13.4606	13.2081	14.0925	12.4628	17.8094	12.7672	14.8491	13.8347	12.9646	12.5751	17.5452	11.8036	16.6723
+	6.85509	1.89561	C[125.0477]WRSKTFPACDGSHNK[54.0106]	sp|Q8N5K1|CISD2_HUMAN	16K(54.0106),1C(125.0477)	Q8N5K1	CISD2_HUMAN	CISD2	CDGSH iron-sulfur domain-containing protein 2	GO:0000422;GO:0006914;GO:0006996;GO:0007005;GO:0008152;GO:0009056;GO:0009894;GO:0009987;GO:0010506;GO:0016043;GO:0019222;GO:0022411;GO:0031323;GO:0031329;GO:0044237;GO:0044248;GO:0050789;GO:0050794;GO:0061919;GO:0065007;GO:0071840;GO:1903008	GO:0003676;GO:0003723;GO:0005488;GO:0005515;GO:0042802;GO:0042803;GO:0043167;GO:0043169;GO:0046872;GO:0046983;GO:0051536;GO:0051537;GO:0051540;GO:0097159	GO:0005741;GO:0005783;GO:0005789;GO:0016020;GO:0019867;GO:0031090;GO:0031966;GO:0031968;GO:0032991;GO:0043226;GO:0043227;GO:0043229;GO:0043231;GO:0097038;GO:0098588;GO:0110165	101	116	12.5654	12.4685	18.4336	12.8174	17.4949	13.695	17.8498	12.4384	14.5217	12.9532	18.8266	13.0405	12.7591	13.5807	18.7655	11.9291	12.8726	13.4069	18.6001	13.5503	12.6326	14.0483	14.3732	16.5774	18.7262	11.9131	17.8988	13.9605	18.7311	14.9466	18.7876	15.9496	18.5755	12.8842	13.0048
+	9.191	1.88438	GK[54.0106]INSITVDNCKK	sp|Q01518|CAP1_HUMAN	2K(54.0106)	Q01518	CAP1_HUMAN	CAP1	Adenylyl cyclase-associated protein 1	GO:0000902;GO:0001667;GO:0006810;GO:0006897;GO:0006898;GO:0007015;GO:0007163;GO:0007165;GO:0007190;GO:0009653;GO:0009987;GO:0016043;GO:0016192;GO:0016477;GO:0019932;GO:0019933;GO:0019935;GO:0031279;GO:0031281;GO:0032502;GO:0035556;GO:0043085;GO:0044093;GO:0045761;GO:0045762;GO:0048870;GO:0050789;GO:0050790;GO:0050794;GO:0051179;GO:0051234;GO:0051339;GO:0051349;GO:0065007;GO:0065009;GO:0071840;GO:…	GO:0003779;GO:0005488;GO:0005515;GO:0008092;GO:0008179;GO:0019899	GO:0005576;GO:0005737;GO:0005775;GO:0005856;GO:0005886;GO:0005925;GO:0016020;GO:0030054;GO:0030055;GO:0030863;GO:0030864;GO:0031974;GO:0031982;GO:0031983;GO:0034774;GO:0035578;GO:0043226;GO:0043227;GO:0043228;GO:0043229;GO:0043230;GO:0043232;GO:0043233;GO:0060205;GO:0065010;GO:0070013;GO:0070062;GO:0070161;GO:0110165;GO:1903561	365	377	17.8366	13.0395	17.5564	13.7455	13.1233	13.3732	12.6664	11.7487	18.3238	12.6533	18.5817	13.476	18.3794	12.8337	16.7088	17.8557	12.2898	12.2089	11.5387	13.0386	12.9801	13.5828	13.179	18.9848	12.7461	12.7689	13.8093	12.507	14.8396	12.5177	12.8113	14.5181	16.0238	15.8561	12.9055
+	7.84745	1.88069	K[54.0106]EEIEAQIK[54.0106]ANYDVLESQK[54.0106]	sp|O00233|PSMD9_HUMAN	19K(54.0106),1K(54.0106),9K(54.0106)	O00233	PSMD9_HUMAN	PSMD9	26S proteasome non-ATPase regulatory subunit 9	GO:0002791;GO:0002792;GO:0002793;GO:0006355;GO:0006508;GO:0006511;GO:0006807;GO:0008152;GO:0009056;GO:0009057;GO:0009889;GO:0009891;GO:0009893;GO:0009987;GO:0010468;GO:0010556;GO:0010557;GO:0010604;GO:0010646;GO:0010647;GO:0010648;GO:0010817;GO:0016043;GO:0019219;GO:0019222;GO:0019538;GO:0019941;GO:0022607;GO:0023051;GO:0023056;GO:0023057;GO:0031323;GO:0031325;GO:0031326;GO:0031328;GO:0032024;GO:…	GO:0003712;GO:0003713;GO:0005488;GO:0005515;GO:0008134;GO:0043425;GO:0140110;GO:0140297	GO:0005634;GO:0005654;GO:0005737;GO:0005829;GO:0005838;GO:0032991;GO:0043226;GO:0043227;GO:0043229;GO:0043231;GO:0110165	30	48	16.0027	17.0437	15.6675	15.9692	17.9006	15.5218	16.1953	15.8076	18.5599	15.8629	16.8526	14.034	13.3475	13.6101	16.7245	12.1322	15.7443	10.9844	16.6515	19.3545	13.1899	15.1538	18.083	12.7597	15.2556	11.9494	16.6499	16.5015	16.4328	14.3696	16.7458	12.4052	19.0906	12.8918	18.3619
+	4.04828	1.87977	AFC[130.0791]VDLHTGLSEFSVTQR[54.0106]	sp|O75185|AT2C2_HUMAN	18R(54.0106),3C(130.0791)	O75185	AT2C2_HUMAN	ATP2C2	Calcium-transporting ATPase type 2C member 2	GO:0000041;GO:0006810;GO:0006811;GO:0006812;GO:0006816;GO:0006828;GO:0006873;GO:0006874;GO:0008104;GO:0009888;GO:0009987;GO:0010959;GO:0019725;GO:0030001;GO:0030003;GO:0032502;GO:0032879;GO:0033036;GO:0034220;GO:0042592;GO:0043269;GO:0043270;GO:0048518;GO:0048856;GO:0048878;GO:0050789;GO:0050801;GO:0051049;GO:0051050;GO:0051179;GO:0051234;GO:0051641;GO:0051668;GO:0051924;GO:0051928;GO:0055074;GO:…	GO:0000166;GO:0003824;GO:0005215;GO:0005384;GO:0005388;GO:0005488;GO:0005524;GO:0008324;GO:0015075;GO:0015085;GO:0015318;GO:0015399;GO:0015662;GO:0016462;GO:0016787;GO:0016817;GO:0016818;GO:0016887;GO:0017076;GO:0017111;GO:0019829;GO:0022804;GO:0022853;GO:0022857;GO:0022890;GO:0030554;GO:0032553;GO:0032555;GO:0032559;GO:0035639;GO:0036094;GO:0042626;GO:0043167;GO:0043168;GO:0043169;GO:0046872;GO:…	GO:0000139;GO:0005783;GO:0005886;GO:0009898;GO:0016020;GO:0016323;GO:0031090;GO:0031410;GO:0031982;GO:0032588;GO:0043226;GO:0043227;GO:0043229;GO:0043231;GO:0048471;GO:0097708;GO:0098552;GO:0098562;GO:0098588;GO:0098590;GO:0110165	68	85	19.7176	14.1657	12.4977	14.2409	13.3563	13.2161	13.2673	13.0871	20.8452	12.5962	12.9918	12.881	12.4231	12.609	13.9352	12.1691	12.0497	12.0401	12.2251	14.8695	11.3775	14.0324	20.0928	13.0026	12.0416	12.2017	12.581	19.2953	11.9132	11.9437	19.5762	11.8863	13.7007	13.7176	19.4041
+	3.78335	1.87922	QLTMYRVWIQCK[54.0106]YCK[54.0106]	sp|Q6P1Q9|MET2B_HUMAN	12K(54.0106),15K(54.0106)	Q6P1Q9	MET2B_HUMAN	METTL2B	tRNA N(3)-methylcytidine methyltransferase METTL2B	GO:0001510;GO:0006139;GO:0006396;GO:0006399;GO:0006400;GO:0006725;GO:0006807;GO:0008033;GO:0008152;GO:0009451;GO:0009987;GO:0016070;GO:0030488;GO:0032259;GO:0034470;GO:0034641;GO:0034660;GO:0043170;GO:0043412;GO:0043414;GO:0044237;GO:0044238;GO:0046483;GO:0071704;GO:0090304;GO:1901360	GO:0003824;GO:0008168;GO:0008173;GO:0008175;GO:0008757;GO:0016427;GO:0016740;GO:0016741;GO:0052735;GO:0140098;GO:0140101;GO:0140640	GO:0005737;GO:0110165	357	371	18.6329	19.3651	18.9251	19.2638	19.9631	18.6663	19.6996	18.6692	18.9186	19.3482	18.9174	12.8718	15.9801	12.5036	19.1822	16.5939	17.1723	16.0596	18.4092	19.6122	10.8115	20.2147	17.7093	12.7539	13.1384	11.8863	18.2877	17.119	13.5029	13.1935	17.7412	16.8818	18.4378	12.9138	18.039
+	9.2326	1.87708	SLVGVLIHC[125.0477]LK[54.0106]	sp|Q01118|SCN7A_HUMAN	11K(54.0106),9C(125.0477)	Q01118	SCN7A_HUMAN	SCN7A	Sodium channel protein type 7 subunit alpha	GO:0003008;GO:0003012;GO:0006810;GO:0006811;GO:0006812;GO:0006814;GO:0006816;GO:0006936;GO:0009605;GO:0009607;GO:0009617;GO:0009987;GO:0019725;GO:0030001;GO:0032501;GO:0032879;GO:0034220;GO:0034762;GO:0034765;GO:0042592;GO:0043207;GO:0043269;GO:0044419;GO:0048878;GO:0050789;GO:0050794;GO:0050801;GO:0050896;GO:0051049;GO:0051179;GO:0051234;GO:0051707;GO:0055078;GO:0055080;GO:0055085;GO:0065007;GO:…	GO:0005215;GO:0005216;GO:0005244;GO:0005245;GO:0005248;GO:0005261;GO:0005262;GO:0005272;GO:0008324;GO:0008331;GO:0015075;GO:0015081;GO:0015085;GO:0015267;GO:0015318;GO:0022803;GO:0022832;GO:0022836;GO:0022843;GO:0022857;GO:0022890;GO:0046873;GO:1901702	GO:0001518;GO:0005891;GO:0032991;GO:0034702;GO:0034703;GO:0034704;GO:0034706;GO:0042995;GO:0097386;GO:0098796;GO:0098797;GO:0110165;GO:0120025;GO:1902495;GO:1990351	225	235	15.3892	16.7051	15.8386	12.613	17.687	15.5419	16.5243	15.7823	17.3492	13.7062	16.1858	14.0341	13.6256	12.8117	15.3867	11.9399	14.287	11.806	17.0124	17.9402	12.1359	13.5926	15.6861	16.3951	15.0705	13.312	16.462	15.5684	16.114	13.2304	16.1337	13.0205	18.0688	12.8218	17.0439
+	4.6367	1.87174	ISPPTPK[54.0106]	sp|P27986|P85A_HUMAN	7K(54.0106)	P27986	P85A_HUMAN	PIK3R1	Phosphatidylinositol 3-kinase regulatory subunit alpha	GO:0001678;GO:0001775;GO:0001817;GO:0001819;GO:0001952;GO:0001953;GO:0002376;GO:0002521;GO:0002573;GO:0002682;GO:0002683;GO:0002684;GO:0002685;GO:0002687;GO:0002761;GO:0002762;GO:0002831;GO:0006139;GO:0006351;GO:0006355;GO:0006357;GO:0006366;GO:0006606;GO:0006629;GO:0006644;GO:0006650;GO:0006661;GO:0006725;GO:0006793;GO:0006796;GO:0006807;GO:0006810;GO:0006886;GO:0006913;GO:0006950;GO:0006955;GO:…	GO:0001727;GO:0001784;GO:0003824;GO:0005068;GO:0005102;GO:0005126;GO:0005158;GO:0005159;GO:0005165;GO:0005167;GO:0005168;GO:0005488;GO:0005515;GO:0008047;GO:0016301;GO:0016740;GO:0016772;GO:0016773;GO:0017046;GO:0019207;GO:0019209;GO:0019899;GO:0019900;GO:0019901;GO:0019902;GO:0019903;GO:0030159;GO:0030234;GO:0030674;GO:0030971;GO:0033218;GO:0035014;GO:0035591;GO:0036312;GO:0042277;GO:0042562;GO:…	GO:0005634;GO:0005737;GO:0005801;GO:0005829;GO:0005886;GO:0005911;GO:0005942;GO:0005943;GO:0016020;GO:0030054;GO:0031090;GO:0032991;GO:0043226;GO:0043227;GO:0043229;GO:0043231;GO:0048471;GO:0061695;GO:0070161;GO:0097651;GO:0098796;GO:0110165;GO:1902494;GO:1990234;GO:1990578	82	88	16.8353	13.5064	17.439	16.5641	18.6495	17.6992	18.3959	12.5264	14.4533	16.7891	18.0664	16.7958	12.6548	13.3589	18.0817	12.6881	12.7415	11.3483	18.9433	19.3729	12.4547	17.1754	13.6763	13.7851	17.9149	11.6089	18.367	13.2367	17.9139	18.0166	13.2072	11.9889	18.6857	12.9668	13.337
+	3.91764	1.86632	K[54.0106]CLETLAIQCGHK[54.0106]	sp|Q92619|HMHA1_HUMAN	13K(54.0106),1K(54.0106)	Q92619	HMHA1_HUMAN	ARHGAP45	Rho GTPase-activating protein 45	GO:0007165;GO:0009966;GO:0009987;GO:0010646;GO:0023051;GO:0048583;GO:0050789;GO:0050794;GO:0051056;GO:0065007;GO:1902531	GO:0005096;GO:0005488;GO:0008047;GO:0030234;GO:0030695;GO:0043167;GO:0043169;GO:0046872;GO:0060589;GO:0098772;GO:0140677	GO:0005576;GO:0005775;GO:0005829;GO:0005886;GO:0016020;GO:0031253;GO:0031256;GO:0031974;GO:0031983;GO:0032587;GO:0034774;GO:0035578;GO:0043233;GO:0060205;GO:0070013;GO:0098590;GO:0110165	738	750	12.6863	13.634	13.5025	14.0947	20.0871	12.5169	19.8242	14.3312	13.1767	13.1106	19.5738	12.6668	17.6103	12.8837	19.7805	17.9866	12.1455	12.0696	20.1615	21.3843	12.5083	13.8266	20.1443	13.1341	19.314	12.0449	19.8832	19.2196	19.791	19.4915	19.8193	18.5083	19.9994	12.3945	20.4299
+	6.77326	1.85946	M[15.9949]VAVNLATGK[54.0106]	sp|P78332|RBM6_HUMAN	10K(54.0106),1M(15.9949)	P78332	RBM6_HUMAN	RBM6	RNA-binding protein 6	GO:0000375;GO:0000377;GO:0000398;GO:0006139;GO:0006396;GO:0006397;GO:0006725;GO:0006807;GO:0008152;GO:0008380;GO:0009987;GO:0016070;GO:0016071;GO:0034641;GO:0043170;GO:0044237;GO:0044238;GO:0046483;GO:0071704;GO:0090304;GO:1901360	GO:0003676;GO:0003677;GO:0003723;GO:0005488;GO:0097159	GO:0005634;GO:0043226;GO:0043227;GO:0043229;GO:0043231;GO:0110165	732	741	16.3874	16.1337	15.6609	13.4933	18.2318	12.9524	18.6817	15.7559	17.9822	13.882	16.9359	13.9881	13.2958	13.3672	16.9059	13.3494	12.2204	12.644	16.8793	19.7914	11.8945	14.1883	13.7151	16.7811	16.2587	12.4219	17.2441	14.271	16.177	16.4485	15.0314	14.545	18.8082	14.0783	16.4432
+	8.86683	1.85937	SC[125.0477]NCLLLK[54.0106]VNQIGSVTESLQACK[54.0106]	sp|P06733|ENOA_HUMAN	23K(54.0106),2C(125.0477),8K(54.0106)	P06733	ENOA_HUMAN	ENO1	Alpha-enolase	GO:0000122;GO:0001558;GO:0005975;GO:0005996;GO:0006006;GO:0006007;GO:0006082;GO:0006090;GO:0006091;GO:0006094;GO:0006096;GO:0006139;GO:0006140;GO:0006163;GO:0006195;GO:0006355;GO:0006357;GO:0006725;GO:0006734;GO:0006735;GO:0006753;GO:0006793;GO:0006796;GO:0006807;GO:0006937;GO:0008152;GO:0009056;GO:0009058;GO:0009117;GO:0009132;GO:0009134;GO:0009135;GO:0009137;GO:0009141;GO:0009144;GO:0009150;GO:…	GO:0000287;GO:0000976;GO:0000977;GO:0000981;GO:0001067;GO:0001217;GO:0001221;GO:0001222;GO:0001227;GO:0003676;GO:0003677;GO:0003690;GO:0003700;GO:0003712;GO:0003714;GO:0003723;GO:0003824;GO:0004634;GO:0005488;GO:0005515;GO:0008134;GO:0016829;GO:0016835;GO:0016836;GO:0019899;GO:0042802;GO:0042803;GO:0043167;GO:0043169;GO:0043565;GO:0045296;GO:0046872;GO:0046983;GO:0050839;GO:0051020;GO:0097159;GO:…	GO:0000015;GO:0005615;GO:0005634;GO:0005640;GO:0005737;GO:0005829;GO:0005886;GO:0005938;GO:0009986;GO:0016020;GO:0019867;GO:0031090;GO:0031430;GO:0031965;GO:0031968;GO:0031982;GO:0032991;GO:0043226;GO:0043227;GO:0043229;GO:0043230;GO:0043231;GO:0065010;GO:0070062;GO:0098588;GO:0110165;GO:1902494;GO:1903561	336	358	13.3111	13.3552	15.6296	15.5933	11.8618	13.0902	13.2993	12.4113	13.4524	13.0366	16.2351	12.3937	13.4535	13.0271	16.7766	12.6646	13.2729	12.0875	16.2442	18.7043	13.2542	12.769	18.1616	14.887	14.0738	12.9869	16.4767	12.4516	16.4406	12.4488	16.3758	10.6772	18.5288	12.9955	18.3446
+	9.66823	1.85386	LSLDSYLLK[54.0106]	sp|O15068|MCF2L_HUMAN	9K(54.0106)	O15068	MCF2L_HUMAN	MCF2L	Guanine nucleotide exchange factor DBS	GO:0007165;GO:0009966;GO:0009967;GO:0009987;GO:0010646;GO:0010647;GO:0023051;GO:0023056;GO:0035023;GO:0035025;GO:0035556;GO:0046578;GO:0046579;GO:0048518;GO:0048522;GO:0048583;GO:0048584;GO:0050789;GO:0050794;GO:0051056;GO:0051057;GO:0065007;GO:1902531;GO:1902533	GO:0005085;GO:0005488;GO:0005543;GO:0008289;GO:0030234;GO:0030695;GO:0035091;GO:0060589;GO:0098772	GO:0005615;GO:0005737;GO:0005829;GO:0005886;GO:0012505;GO:0016020;GO:0019897;GO:0019898;GO:0031234;GO:0110165	758	766	14.9597	15.5033	15.9633	15.0007	19.131	15.5499	15.9321	15.7538	19.0301	14.7948	17.1762	12.5253	13.4046	12.9946	16.3584	12.6481	12.5107	12.2916	15.4917	16.6835	12.265	15.0399	16.6158	17.4864	15.8803	12.3077	15.6481	16.2789	16.6237	14.8765	15.9465	13.3652	16.7818	12.8757	18.1657
+	4.52335	1.85317	RHDLAPTK[54.0106]R[54.0106]	sp|Q96PV6|LENG8_HUMAN	8K(54.0106),9R(54.0106)	Q96PV6	LENG8_HUMAN	LENG8	Leukocyte receptor cluster member 8			GO:0005634;GO:0032991;GO:0043226;GO:0043227;GO:0043229;GO:0043231;GO:0110165	482	490	19.0171	13.2845	12.5811	12.9266	12.7674	12.4954	13.4613	13.1864	15.461	18.1431	12.8542	12.8497	14.1655	12.7015	13.7227	15.5689	12.8591	15.8379	13.3944	16.3039	12.9966	13.6114	17.4605	12.3761	19.1172	14.6351	12.6777	12.8264	12.6652	17.1075	18.8094	15.9595	14.135	12.7071	13.1686
+	5.96349	1.84828	PPPWLSELPENTSLQEHGVK[54.0106]	sp|O94885|SASH1_HUMAN	20K(54.0106)	O94885	SASH1_HUMAN	SASH1	SAM and SH3 domain-containing protein 1	GO:0000209;GO:0001932;GO:0001934;GO:0002831;GO:0002833;GO:0006807;GO:0008152;GO:0009893;GO:0009966;GO:0009967;GO:0010562;GO:0010594;GO:0010595;GO:0010604;GO:0010632;GO:0010634;GO:0010646;GO:0010647;GO:0016567;GO:0019220;GO:0019222;GO:0019538;GO:0022603;GO:0023051;GO:0023056;GO:0030334;GO:0030335;GO:0031323;GO:0031325;GO:0031396;GO:0031399;GO:0031401;GO:0031664;GO:0031666;GO:0032101;GO:0032103;GO:…	GO:0001965;GO:0005488;GO:0005515;GO:0019899;GO:0019900;GO:0019901;GO:0031435;GO:0060090	GO:0005654;GO:0005737;GO:0005829;GO:0032991;GO:0110165	1057	1076	13.8274	19.2979	12.4453	13.0941	20.0288	13.0661	14.8799	12.4509	19.6996	13.2126	19.3934	13.4024	13.2137	13.2698	19.4221	12.266	12.7967	11.931	19.7169	13.0559	12.9065	13.4333	13.1609	11.3826	19.3472	12.7504	20.1728	13.5464	19.5158	12.8263	13.6023	12.7744	19.8404	12.4788	12.3718
+	4.10287	1.84653	LHSTPR[54.0106]PLNIIK[54.0106]QNNGEQIIR[54.0106]	sp|Q9UHF7|TRPS1_HUMAN	12K(54.0106),21R(54.0106),6R(54.0106)	Q9UHF7	TRPS1_HUMAN	TRPS1	Zinc finger transcription factor Trps1	GO:0000122;GO:0001501;GO:0006355;GO:0006357;GO:0009889;GO:0009890;GO:0009892;GO:0010468;GO:0010556;GO:0010558;GO:0010605;GO:0019219;GO:0019222;GO:0031323;GO:0031324;GO:0031326;GO:0031327;GO:0032330;GO:0032502;GO:0045595;GO:0045892;GO:0045934;GO:0048519;GO:0048523;GO:0048731;GO:0048856;GO:0050789;GO:0050793;GO:0050794;GO:0051171;GO:0051172;GO:0051239;GO:0051252;GO:0051253;GO:0060255;GO:0061035;GO:…	GO:0000976;GO:0000977;GO:0000981;GO:0001067;GO:0001217;GO:0001227;GO:0003676;GO:0003677;GO:0003690;GO:0003700;GO:0005488;GO:0005515;GO:0008270;GO:0019904;GO:0043167;GO:0043169;GO:0043565;GO:0046872;GO:0046914;GO:0097159;GO:0140110;GO:1990837	GO:0000785;GO:0005634;GO:0005654;GO:0032991;GO:0032993;GO:0043226;GO:0043227;GO:0043229;GO:0043231;GO:0110165	926	946	11.3615	14.688	11.8567	13.8207	13.1177	12.2587	20.2376	13.4538	12.9579	13.2348	13.2571	12.5327	13.0874	12.7936	13.1874	11.5853	11.9984	10.4463	14.2117	14.4071	11.7845	13.823	12.88	11.9791	12.5763	12.9331	22.1274	11.8052	12.5627	13.0774	12.811	12.9116	14.1516	13.6393	12.9206
+	5.07017	1.83953	K[54.0106]ASATEARYNKLK	sp|O75146|HIP1R_HUMAN	1K(54.0106)	O75146	HIP1R_HUMAN	HIP1R	Huntingtin-interacting protein 1-related protein	GO:0006810;GO:0006897;GO:0006898;GO:0006919;GO:0006996;GO:0007005;GO:0007006;GO:0007015;GO:0008064;GO:0009893;GO:0009966;GO:0009967;GO:0009987;GO:0010604;GO:0010638;GO:0010639;GO:0010640;GO:0010641;GO:0010646;GO:0010647;GO:0010821;GO:0010822;GO:0010950;GO:0010952;GO:0016043;GO:0016192;GO:0019222;GO:0022607;GO:0023051;GO:0023056;GO:0030100;GO:0030162;GO:0030832;GO:0030833;GO:0030837;GO:0031333;GO:…	GO:0003779;GO:0005488;GO:0005515;GO:0005543;GO:0005546;GO:0005547;GO:0008092;GO:0008289;GO:0017124;GO:0019904;GO:0030276;GO:0030674;GO:0032051;GO:0035091;GO:0035615;GO:0042802;GO:0042803;GO:0043167;GO:0043168;GO:0043325;GO:0044877;GO:0046982;GO:0046983;GO:0051015;GO:0060090;GO:0080025;GO:0140312;GO:1901981;GO:1902936	GO:0005737;GO:0005739;GO:0005829;GO:0005856;GO:0005886;GO:0005905;GO:0005938;GO:0012506;GO:0014069;GO:0016020;GO:0016324;GO:0030054;GO:0030135;GO:0030136;GO:0030659;GO:0030662;GO:0030665;GO:0031090;GO:0031253;GO:0031256;GO:0031410;GO:0031982;GO:0032587;GO:0032838;GO:0032839;GO:0042995;GO:0043005;GO:0043025;GO:0043197;GO:0043226;GO:0043227;GO:0043228;GO:0043229;GO:0043231;GO:0043232;GO:0044297;GO:…	439	451	12.8072	13.6098	12.0744	13.5408	13.7224	12.5836	15.3906	12.0999	21.1402	12.8497	12.4837	13.5494	12.5701	12.7296	13.8069	11.4986	12.1863	12.4225	12.1466	19.9257	13.2743	15.4108	13.8146	12.1444	12.3704	12.7684	12.2733	13.2373	17.9401	16.0825	17.4175	12.2126	20.1568	12.6903	13.2503
+	4.72338	1.83549	WAPGTQC[130.0791]ITK[54.0106]CEHTR[54.0106]PK	sp|P42679|MATK_HUMAN	10K(54.0106),15R(54.0106),7C(130.0791)	P42679	MATK_HUMAN	MATK	Megakaryocyte-associated tyrosine-protein kinase	GO:0006468;GO:0006793;GO:0006796;GO:0006807;GO:0008152;GO:0008284;GO:0009987;GO:0016310;GO:0019538;GO:0036211;GO:0042127;GO:0043170;GO:0043412;GO:0044237;GO:0044238;GO:0048518;GO:0048522;GO:0050789;GO:0050794;GO:0065007;GO:0071704;GO:1901564	GO:0000166;GO:0003824;GO:0004672;GO:0004713;GO:0004715;GO:0005488;GO:0005524;GO:0016301;GO:0016740;GO:0016772;GO:0016773;GO:0017076;GO:0030554;GO:0032553;GO:0032555;GO:0032559;GO:0035639;GO:0036094;GO:0043167;GO:0043168;GO:0097159;GO:0097367;GO:0140096;GO:1901265;GO:1901363	GO:0005829;GO:0016020;GO:0110165	47	63	13.3006	13.2933	15.7832	12.2518	12.9707	13.5666	13.8778	13.8075	14.5931	13.2085	18.1387	14.1604	13.1468	12.7545	15.9128	12.4222	13.1217	11.5917	16.1781	13.4225	12.6736	13.9249	16.8307	18.5958	17.2519	12.4001	12.88	13.3118	18.4736	17.938	18.454	16.0539	17.6424	12.745	19.3772
+	5.15012	1.83035	ER[54.0106]PQPDSMPQDLSEALKEATK[54.0106]	sp|P09601|HMOX1_HUMAN	21K(54.0106),2R(54.0106)	P09601	HMOX1_HUMAN	HMOX1	Heme oxygenase 1	GO:0000302;GO:0001525;GO:0001666;GO:0001817;GO:0001819;GO:0001935;GO:0001936;GO:0001938;GO:0002246;GO:0002262;GO:0002376;GO:0002682;GO:0002683;GO:0002685;GO:0002686;GO:0003008;GO:0003012;GO:0006355;GO:0006725;GO:0006778;GO:0006787;GO:0006788;GO:0006807;GO:0006873;GO:0006879;GO:0006914;GO:0006915;GO:0006950;GO:0006979;GO:0007165;GO:0008152;GO:0008219;GO:0008283;GO:0008284;GO:0008285;GO:0009056;GO:…	GO:0003824;GO:0004392;GO:0004497;GO:0005198;GO:0005488;GO:0005515;GO:0016491;GO:0016705;GO:0016712;GO:0019899;GO:0020037;GO:0042802;GO:0042803;GO:0043167;GO:0043169;GO:0046872;GO:0046906;GO:0046983;GO:0097159	GO:0005615;GO:0005634;GO:0005654;GO:0005741;GO:0005783;GO:0005789;GO:0005829;GO:0016020;GO:0019867;GO:0031090;GO:0031966;GO:0031968;GO:0043226;GO:0043227;GO:0043229;GO:0043231;GO:0048471;GO:0098588;GO:0110165	2	22	13.0933	12.5394	12.9532	13.212	13.8268	12.7025	13.8895	11.9332	13.1719	12.0145	12.2453	13.6885	13.4129	12.299	12.9783	13.2326	13.6999	11.3626	13.4582	13.8583	12.2105	12.9905	20.3169	12.7841	12.8558	12.1981	12.1106	11.4446	12.6612	12.8524	20.4247	12.8815	21.4536	13.1708	20.3425
+	11.4975	1.8237	M[15.9949]SNALAIQVDSEGKIK[54.0106]YDAIAR[54.0106]	sp|Q13573|SNW1_HUMAN	16K(54.0106),1M(15.9949),22R(54.0106)	Q13573	SNW1_HUMAN	SNW1	SNW domain-containing protein 1	GO:0000122;GO:0000375;GO:0000377;GO:0000398;GO:0006139;GO:0006355;GO:0006357;GO:0006396;GO:0006397;GO:0006725;GO:0006807;GO:0006950;GO:0006974;GO:0007165;GO:0008152;GO:0008380;GO:0008630;GO:0009889;GO:0009890;GO:0009891;GO:0009892;GO:0009893;GO:0009966;GO:0009967;GO:0009987;GO:0010033;GO:0010468;GO:0010556;GO:0010557;GO:0010558;GO:0010604;GO:0010605;GO:0010628;GO:0010646;GO:0010647;GO:0010720;GO:…	GO:0003676;GO:0003712;GO:0003713;GO:0003714;GO:0003723;GO:0005102;GO:0005112;GO:0005488;GO:0005515;GO:0008134;GO:0016922;GO:0019899;GO:0042809;GO:0042974;GO:0046332;GO:0050681;GO:0061629;GO:0097159;GO:0140110;GO:0140297	GO:0005634;GO:0005654;GO:0005681;GO:0005684;GO:0016363;GO:0016604;GO:0016607;GO:0032991;GO:0043226;GO:0043227;GO:0043229;GO:0043231;GO:0071007;GO:0071013;GO:0110165;GO:0140513;GO:1902494;GO:1990904	82	103	13.4909	13.5106	16.5996	12.6411	16.0919	14.0824	15.3532	13.1386	13.2206	12.8313	15.5537	13.3127	13.4231	11.9395	16.8272	13.242	15.7527	10.7669	17.0172	13.6733	11.1543	14.393	15.5799	12.1994	15.3851	11.9369	15.5362	13.6122	16.158	12.7042	16.0294	12.3856	16.2673	11.7588	11.9959
+	4.30274	1.82188	LIDFLQAKMDQPAK[54.0106]K	sp|O14578|CTRO_HUMAN	14K(54.0106)	O14578	CTRO_HUMAN	CIT	Citron Rho-interacting kinase	GO:0000278;GO:0000281;GO:0000910;GO:0006793;GO:0006796;GO:0006915;GO:0007049;GO:0008152;GO:0008219;GO:0009966;GO:0009968;GO:0009987;GO:0010564;GO:0010646;GO:0010648;GO:0012501;GO:0016310;GO:0022008;GO:0022402;GO:0023051;GO:0023057;GO:0030154;GO:0032465;GO:0032467;GO:0032502;GO:0035330;GO:0035331;GO:0044237;GO:0045787;GO:0048518;GO:0048519;GO:0048522;GO:0048523;GO:0048583;GO:0048585;GO:0048699;GO:…	GO:0000166;GO:0001221;GO:0001223;GO:0003824;GO:0004672;GO:0004674;GO:0004857;GO:0004860;GO:0005488;GO:0005515;GO:0005524;GO:0008134;GO:0016301;GO:0016740;GO:0016772;GO:0016773;GO:0017076;GO:0017124;GO:0019207;GO:0019210;GO:0019887;GO:0019899;GO:0019900;GO:0019901;GO:0019904;GO:0030165;GO:0030234;GO:0030291;GO:0030554;GO:0032553;GO:0032555;GO:0032559;GO:0035639;GO:0036094;GO:0043167;GO:0043168;GO:…	GO:0005829;GO:0016020;GO:0110165	1222	1236	12.67	12.6418	12.0994	11.9795	21.9225	12.5371	21.2618	13.5473	13.7606	12.3891	21.2193	12.7727	13.2447	13.2059	20.1239	12.2859	11.9733	12.3031	19.99	21.4863	12.4196	13.8928	13.0241	12.6516	20.2072	11.7776	21.1383	12.4174	20.6827	19.3028	13.1301	11.7201	21.2568	12.3739	11.7166
+	7.30991	1.82092	SR[54.0106]GGFSSR[54.0106]GGFSSR[54.0106]	sp|Q8N1N4|K2C78_HUMAN	14R(54.0106),2R(54.0106),8R(54.0106)	Q8N1N4	K2C78_HUMAN	KRT78	Keratin, type II cytoskeletal 78	GO:0006996;GO:0007010;GO:0009987;GO:0016043;GO:0031424;GO:0032501;GO:0045103;GO:0045104;GO:0045109;GO:0071840;GO:0097435	GO:0005198;GO:0030280	GO:0005615;GO:0005829;GO:0005882;GO:0031982;GO:0043226;GO:0043227;GO:0043230;GO:0045095;GO:0065010;GO:0070062;GO:0099080;GO:0099081;GO:0099512;GO:0099513;GO:0110165;GO:1903561	26	39	13.1229	12.7472	16.4073	12.3559	12.4444	12.6563	13.3327	12.8404	13.4332	13.5558	13.0776	13.9626	13.3017	13.1694	13.1739	12.594	12.9503	12.4168	12.538	13.2916	12.667	13.6304	12.4878	12.9486	16.5383	12.4005	13.0783	12.901	15.9587	13.1517	12.8539	12.8061	12.0025	12.1844	12.7084
+	7.65955	1.8134	SQHTKANR[54.0106]QR	sp|P11310|ACADM_HUMAN	8R(54.0106)	P11310	ACADM_HUMAN	ACADM	Medium-chain specific acyl-CoA dehydrogenase, mitochondrial	GO:0000271;GO:0001889;GO:0005975;GO:0005976;GO:0005977;GO:0005978;GO:0006082;GO:0006091;GO:0006109;GO:0006111;GO:0006112;GO:0006575;GO:0006577;GO:0006578;GO:0006629;GO:0006631;GO:0006635;GO:0006807;GO:0006950;GO:0008152;GO:0009056;GO:0009058;GO:0009059;GO:0009062;GO:0009250;GO:0009266;GO:0009409;GO:0009437;GO:0009605;GO:0009628;GO:0009791;GO:0009889;GO:0009987;GO:0009991;GO:0010906;GO:0015980;GO:…	GO:0000166;GO:0003824;GO:0003995;GO:0005488;GO:0005515;GO:0016491;GO:0016627;GO:0036094;GO:0042802;GO:0043167;GO:0043168;GO:0050660;GO:0052890;GO:0070991;GO:0097159;GO:1901265;GO:1901363	GO:0005634;GO:0005737;GO:0005739;GO:0005759;GO:0016020;GO:0030424;GO:0031090;GO:0031966;GO:0031974;GO:0042995;GO:0043005;GO:0043226;GO:0043227;GO:0043229;GO:0043231;GO:0043233;GO:0070013;GO:0110165;GO:0120025	22	31	17.8155	13.0537	16.2122	12.6925	18.168	13.2925	18.8052	12.1002	15.2977	13.8978	18.5517	12.6987	13.5735	12.8726	17.0702	11.9666	16.4204	12.5812	15.9421	17.6939	13.4452	13.5008	12.843	12.9636	15.6756	11.5891	12.2216	12.5937	16.8602	16.1162	17.5125	12.2976	13.522	16.6875	16.6153
+	5.02289	1.8008	ILQEGVDPK[54.0106]K	sp|P40939|ECHA_HUMAN	9K(54.0106)	P40939	ECHA_HUMAN	HADHA	Trifunctional enzyme subunit alpha, mitochondrial	GO:0006082;GO:0006629;GO:0006631;GO:0006635;GO:0006644;GO:0006650;GO:0006793;GO:0006796;GO:0008152;GO:0009056;GO:0009062;GO:0009410;GO:0009719;GO:0009725;GO:0009987;GO:0010033;GO:0010243;GO:0016042;GO:0016054;GO:0019395;GO:0019637;GO:0019752;GO:0030258;GO:0032048;GO:0032787;GO:0032868;GO:0034440;GO:0035965;GO:0042221;GO:0043434;GO:0043436;GO:0044237;GO:0044238;GO:0044242;GO:0044248;GO:0044255;GO:…	GO:0000062;GO:0000166;GO:0003824;GO:0003857;GO:0003985;GO:0003988;GO:0004300;GO:0005488;GO:0008289;GO:0016407;GO:0016408;GO:0016453;GO:0016491;GO:0016509;GO:0016614;GO:0016616;GO:0016740;GO:0016746;GO:0016747;GO:0016829;GO:0016835;GO:0016836;GO:0017076;GO:0018812;GO:0030554;GO:0032553;GO:0032555;GO:0032559;GO:0033218;GO:0036094;GO:0043167;GO:0043168;GO:0044877;GO:0051287;GO:0070403;GO:0097159;GO:…	GO:0005739;GO:0005743;GO:0009295;GO:0016020;GO:0016507;GO:0019866;GO:0031090;GO:0031966;GO:0032991;GO:0036125;GO:0042645;GO:0043226;GO:0043227;GO:0043228;GO:0043229;GO:0043231;GO:0043232;GO:0098798;GO:0110165;GO:1902494	561	570	13.6095	13.8249	16.8389	13.758	13.1333	12.7471	21.0291	11.9121	12.5084	14.0295	15.8454	14.7295	12.7471	13.5451	18.6222	12.5931	11.6361	11.7323	14.7648	14.8784	13.6483	13.9244	13.7105	16.9605	15.3277	12.7085	19.2369	12.9823	17.1303	17.2129	19.2582	12.4716	18.3446	12.4533	13.6813
+	4.41966	1.79384	SVAATIPR[54.0106]R[54.0106]	sp|Q9UQC2|GAB2_HUMAN	8R(54.0106),9R(54.0106)	Q9UQC2	GAB2_HUMAN	GAB2	GRB2-associated-binding protein 2	GO:0002521;GO:0002573;GO:0002682;GO:0002684;GO:0002697;GO:0002699;GO:0002703;GO:0002886;GO:0007165;GO:0008284;GO:0009987;GO:0017157;GO:0030099;GO:0030154;GO:0030316;GO:0032502;GO:0032879;GO:0035556;GO:0042127;GO:0043300;GO:0043302;GO:0043304;GO:0043306;GO:0043491;GO:0045921;GO:0048518;GO:0048522;GO:0048869;GO:0050789;GO:0050794;GO:0051046;GO:0051047;GO:0051049;GO:0051050;GO:0060627;GO:0065007;GO:…	GO:0005068;GO:0005102;GO:0005488;GO:0005515;GO:0005543;GO:0005547;GO:0008289;GO:0019899;GO:0019900;GO:0019901;GO:0030159;GO:0030674;GO:0030971;GO:0035091;GO:0035591;GO:0043167;GO:0043168;GO:0043325;GO:0060090;GO:1901981;GO:1990782	GO:0005737;GO:0005829;GO:0005886;GO:0016020;GO:0045121;GO:0098857;GO:0110165	381	389	17.5691	13.1141	18.9434	18.269	20.9307	19.4144	20.8626	18.5689	19.9886	17.8295	19.5459	17.8228	16.5931	13.1142	20.0148	17.2812	15.8685	12.0057	20.1415	21.7344	12.7184	16.0346	16.3578	18.5207	19.3952	11.9555	20.7098	15.4896	19.2031	19.1145	17.5978	17.3614	20.6622	16.613	17.9512
+	9.77279	1.79316	GTFATLSELHCDK[54.0106]LHVDPENFR[54.0106]	sp|P68871|HBB_HUMAN	13K(54.0106),22R(54.0106)	P68871	HBB_HUMAN	HBB	Hemoglobin subunit beta	GO:0000302;GO:0003008;GO:0003013;GO:0003014;GO:0003018;GO:0006810;GO:0006950;GO:0006979;GO:0007155;GO:0008152;GO:0008217;GO:0009056;GO:0009889;GO:0009891;GO:0009893;GO:0009987;GO:0010033;GO:0010035;GO:0015669;GO:0015670;GO:0015671;GO:0019222;GO:0019755;GO:0030185;GO:0031323;GO:0031325;GO:0031326;GO:0031328;GO:0032501;GO:0034109;GO:0035150;GO:0035296;GO:0042221;GO:0042542;GO:0042743;GO:0042744;GO:…	GO:0005344;GO:0005488;GO:0005515;GO:0019825;GO:0020037;GO:0030492;GO:0031721;GO:0036094;GO:0043167;GO:0043169;GO:0043177;GO:0046872;GO:0046906;GO:0097159;GO:0140104	GO:0005576;GO:0005615;GO:0005829;GO:0005833;GO:0031838;GO:0031974;GO:0031982;GO:0032991;GO:0043226;GO:0043227;GO:0043230;GO:0043233;GO:0065010;GO:0070013;GO:0070062;GO:0071682;GO:0072562;GO:0110165;GO:1903561;GO:1904724;GO:1904813	84	105	16.7279	16.9581	17.1631	16.9721	19.1417	16.4845	18.3761	16.6968	15.4208	16.7777	17.952	15.9151	14.3627	12.331	17.1577	15.5191	16.448	11.3038	18.2337	19.8222	14.473	16.8155	18.3524	17.6235	16.7593	12.149	17.5423	17.0684	17.1727	17.5252	16.5446	15.0261	18.5465	15.0109	18.1689
+	3.58334	1.79248	SPFVVQVGEAC[130.0791]NPNACRASGRGLQPK[54.0106]	sp|O75369|FLNB_HUMAN	11C(130.0791),26K(54.0106)	O75369	FLNB_HUMAN	FLNB	Filamin-B	GO:0000902;GO:0002064;GO:0003334;GO:0003382;GO:0006996;GO:0007010;GO:0007165;GO:0007519;GO:0009653;GO:0009888;GO:0009987;GO:0010033;GO:0016043;GO:0030029;GO:0030036;GO:0032502;GO:0034097;GO:0034341;GO:0042221;GO:0048468;GO:0048856;GO:0048869;GO:0050789;GO:0050794;GO:0050896;GO:0051716;GO:0060537;GO:0065007;GO:0070887;GO:0071310;GO:0071345;GO:0071346;GO:0071840	GO:0003676;GO:0003723;GO:0003779;GO:0005488;GO:0005515;GO:0008092;GO:0042802;GO:0044877;GO:0045296;GO:0050839;GO:0051015;GO:0097159	GO:0001725;GO:0005737;GO:0005829;GO:0005856;GO:0005886;GO:0005903;GO:0005925;GO:0005938;GO:0015629;GO:0016020;GO:0030018;GO:0030054;GO:0030055;GO:0030139;GO:0031410;GO:0031982;GO:0032432;GO:0042641;GO:0043226;GO:0043227;GO:0043228;GO:0043229;GO:0043230;GO:0043231;GO:0043232;GO:0045335;GO:0065010;GO:0070062;GO:0070161;GO:0097517;GO:0097708;GO:0098862;GO:0110165;GO:1903561	440	465	18.4084	13.6795	20.1165	15.084	19.3649	19.8594	19.8954	12.6898	17.6561	18.2511	19.8019	21.0856	11.9004	19.399	19.2361	18.3719	18.332	18.1001	17.6099	16.0282	11.2986	19.7914	20.6384	18.4908	21.9168	12.7281	19.8954	18.8629	21.3743	22.0255	23.4211	11.6664	17.8826	16.4112	21.0974
+	8.72662	1.79229	AR[54.0106]PEVNLK	sp|P24043|LAMA2_HUMAN	2R(54.0106)	P24043	LAMA2_HUMAN	LAMA2	Laminin subunit alpha-2	GO:0001894;GO:0007155;GO:0007411;GO:0007517;GO:0009966;GO:0009967;GO:0009987;GO:0010001;GO:0010646;GO:0010647;GO:0014037;GO:0016043;GO:0023051;GO:0023056;GO:0030030;GO:0030154;GO:0030155;GO:0030334;GO:0031175;GO:0032222;GO:0032224;GO:0032501;GO:0032502;GO:0035633;GO:0040012;GO:0042592;GO:0045595;GO:0045597;GO:0045785;GO:0045995;GO:0048513;GO:0048518;GO:0048522;GO:0048583;GO:0048584;GO:0048856;GO:…	GO:0005102;GO:0005198;GO:0005488;GO:0005515	GO:0005576;GO:0005604;GO:0005886;GO:0016020;GO:0030054;GO:0030312;GO:0031012;GO:0031594;GO:0032991;GO:0042383;GO:0042995;GO:0043005;GO:0043083;GO:0043197;GO:0044309;GO:0045202;GO:0062023;GO:0098636;GO:0098637;GO:0098794;GO:0110165;GO:0120025	2483	2490	19.801	18.9711	18.7313	18.0891	21.488	20.0859	21.0014	17.993	21.43	19.7941	20.5966	18.1844	18.8509	15.8242	19.6679	18.6483	18.9732	16.7823	21.1726	20.4244	12.5289	17.6442	19.6507	20.742	19.9617	16.0971	19.8542	19.7747	20.5986	17.8491	19.9818	17.8415	20.434	18.1287	19.9648
+	10.7856	1.78243	ILVSLTM[15.9949]K[54.0106]NCK	sp|Q13315|ATM_HUMAN	7M(15.9949),8K(54.0106)	Q13315	ATM_HUMAN	ATM	Serine-protein kinase ATM	GO:0000075;GO:0000077;GO:0000280;GO:0000302;GO:0000425;GO:0000723;GO:0000724;GO:0000725;GO:0000956;GO:0001541;GO:0001666;GO:0001756;GO:0002200;GO:0002331;GO:0002376;GO:0002562;GO:0002682;GO:0002683;GO:0002694;GO:0002695;GO:0003002;GO:0003006;GO:0006139;GO:0006259;GO:0006281;GO:0006302;GO:0006303;GO:0006310;GO:0006355;GO:0006357;GO:0006401;GO:0006402;GO:0006468;GO:0006725;GO:0006793;GO:0006796;GO:…	GO:0000166;GO:0001727;GO:0003676;GO:0003677;GO:0003824;GO:0004672;GO:0004674;GO:0004677;GO:0005488;GO:0005515;GO:0005524;GO:0016301;GO:0016303;GO:0016740;GO:0016772;GO:0016773;GO:0017076;GO:0030554;GO:0032553;GO:0032555;GO:0032559;GO:0035639;GO:0036094;GO:0042802;GO:0043167;GO:0043168;GO:0044877;GO:0052742;GO:0097159;GO:0097367;GO:0106310;GO:0140096;GO:1901265;GO:1901363	GO:0005634;GO:0005654;GO:0005730;GO:0005737;GO:0005782;GO:0005813;GO:0005815;GO:0005819;GO:0005829;GO:0031410;GO:0031907;GO:0031974;GO:0031982;GO:0032991;GO:0043226;GO:0043227;GO:0043228;GO:0043229;GO:0043231;GO:0043232;GO:0043233;GO:0070013;GO:0097708;GO:0110165;GO:1902494;GO:1990391	611	621	15.1695	13.505	14.5309	13.1065	14.1389	13.0867	14.4987	13.255	14.3612	12.6026	16.7998	13.2382	13.1059	12.9855	15.2438	13.4352	11.7857	12.4001	16.7156	13.746	12.2478	14.2485	12.6632	12.3445	11.7008	12.0688	12.7324	12.6254	16.3976	12.9653	12.6751	12.4872	15.7775	13.2969	12.4393
+	8.5232	1.78172	K[54.0106]LDLEAWFPGSGAFR[54.0106]	sp|P49591|SYSC_HUMAN	15R(54.0106),1K(54.0106)	P49591	SYSC_HUMAN	SARS1	Serine--tRNA ligase, cytoplasmic	GO:0000122;GO:0001514;GO:0001817;GO:0001818;GO:0002181;GO:0006082;GO:0006139;GO:0006355;GO:0006357;GO:0006396;GO:0006399;GO:0006400;GO:0006412;GO:0006414;GO:0006417;GO:0006418;GO:0006434;GO:0006451;GO:0006518;GO:0006520;GO:0006725;GO:0006807;GO:0008033;GO:0008152;GO:0009058;GO:0009059;GO:0009451;GO:0009889;GO:0009890;GO:0009892;GO:0009987;GO:0010468;GO:0010556;GO:0010558;GO:0010574;GO:0010605;GO:…	GO:0000049;GO:0000166;GO:0000976;GO:0000977;GO:0000978;GO:0000987;GO:0001067;GO:0003676;GO:0003677;GO:0003690;GO:0003723;GO:0003824;GO:0004812;GO:0004828;GO:0005488;GO:0005515;GO:0005524;GO:0016874;GO:0016875;GO:0017076;GO:0019899;GO:0030554;GO:0032553;GO:0032555;GO:0032559;GO:0035639;GO:0036094;GO:0042802;GO:0042803;GO:0043167;GO:0043168;GO:0043565;GO:0046983;GO:0060090;GO:0097159;GO:0097367;GO:…	GO:0005634;GO:0005737;GO:0005829;GO:0031982;GO:0043226;GO:0043227;GO:0043229;GO:0043230;GO:0043231;GO:0065010;GO:0070062;GO:0110165;GO:1903561	376	390	13.9691	13.9806	17.0112	12.3359	12.6783	12.5596	14.0193	12.5036	11.6976	13.242	13.9503	13.2241	12.9107	13.4046	14.1696	11.4674	12.8968	12.8222	12.7919	13.8733	13.7992	14.1808	13.4537	12.975	16.755	11.7953	13.2445	11.4614	17.5139	12.3982	11.3568	12.4904	13.5751	13.1461	12.0111
+	7.1926	1.77538	VQGLVISQMLR[54.0106]K[54.0106]SVETR[54.0106]DWLSTLEPR	sp|Q9UID3|VPS51_HUMAN	11R(54.0106),12K(54.0106),17R(54.0106)	Q9UID3	VPS51_HUMAN	VPS51	Vacuolar protein sorting-associated protein 51 homolog	GO:0006605;GO:0006810;GO:0006869;GO:0006914;GO:0006996;GO:0007030;GO:0007034;GO:0007041;GO:0008104;GO:0008152;GO:0009056;GO:0009653;GO:0009887;GO:0009987;GO:0015850;GO:0015918;GO:0016043;GO:0016192;GO:0016197;GO:0016482;GO:0030301;GO:0032365;GO:0032366;GO:0032367;GO:0032456;GO:0032502;GO:0033036;GO:0042147;GO:0044237;GO:0044248;GO:0045184;GO:0046907;GO:0048193;GO:0048854;GO:0051179;GO:0051234;GO:…		GO:0000938;GO:0005730;GO:0005768;GO:0005794;GO:0005829;GO:0016020;GO:0031090;GO:0031410;GO:0031982;GO:0032588;GO:0032991;GO:0043226;GO:0043227;GO:0043228;GO:0043229;GO:0043231;GO:0043232;GO:0055037;GO:0097708;GO:0099023;GO:0110165;GO:1990745	582	607	13.6132	15.2878	12.5582	12.8278	17.8323	13.5476	16.786	13.2486	17.1394	12.8723	16.4777	13.2518	12.9519	12.9973	13.7043	11.4633	12.9823	11.655	16.7659	19.0978	11.9273	13.769	15.0037	13.2686	12.3033	11.712	15.7787	12.9435	12.7854	13.387	15.0746	12.3654	19.8476	12.3817	17.4874
+	8.34522	1.76999	TSPAVTALAVSR[54.0106]	sp|Q6ZS81|WDFY4_HUMAN	12R(54.0106)	Q6ZS81	WDFY4_HUMAN	WDFY4	WD repeat- and FYVE domain-containing protein 4	GO:0001775;GO:0002376;GO:0006914;GO:0008152;GO:0009056;GO:0009605;GO:0009607;GO:0009615;GO:0009987;GO:0019882;GO:0032501;GO:0036037;GO:0042110;GO:0043207;GO:0044237;GO:0044248;GO:0044419;GO:0045321;GO:0046631;GO:0046649;GO:0050896;GO:0051707;GO:0061919;GO:0098586		GO:0005768;GO:0005769;GO:0005783;GO:0031410;GO:0031982;GO:0043226;GO:0043227;GO:0043229;GO:0043231;GO:0097708;GO:0110165	3152	3163	13.4497	16.2622	12.8795	13.3653	18.1026	12.9478	12.8881	11.4584	17.8137	11.6666	16.382	14.2385	13.4634	12.0639	17.0518	13.0172	12.9926	11.401	16.8365	16.869	11.4357	12.4968	13.202	11.1433	16.7276	12.9273	17.3035	11.9655	17.0854	12.7579	13.994	11.907	18.4153	11.9449	12.8917
+	12.4462	1.76597	VCDLIM[15.9949]TAIK[54.0106]	sp|Q7Z6Z7|HUWE1_HUMAN	10K(54.0106),6M(15.9949)	Q7Z6Z7	HUWE1_HUMAN	HUWE1	E3 ubiquitin-protein ligase HUWE1	GO:0000209;GO:0006139;GO:0006259;GO:0006281;GO:0006284;GO:0006513;GO:0006725;GO:0006807;GO:0006950;GO:0006974;GO:0006996;GO:0007030;GO:0007623;GO:0008152;GO:0009889;GO:0009893;GO:0009987;GO:0010468;GO:0010556;GO:0010604;GO:0010635;GO:0010637;GO:0010639;GO:0010821;GO:0010823;GO:0016043;GO:0016567;GO:0019222;GO:0019538;GO:0022603;GO:0030154;GO:0031323;GO:0031326;GO:0031396;GO:0031398;GO:0031399;GO:…	GO:0003676;GO:0003677;GO:0003723;GO:0003824;GO:0004842;GO:0005488;GO:0016740;GO:0016746;GO:0016755;GO:0019787;GO:0061630;GO:0061659;GO:0097159;GO:0140096;GO:0140852;GO:0140993	GO:0000139;GO:0005576;GO:0005634;GO:0005654;GO:0005737;GO:0005739;GO:0005829;GO:0016020;GO:0031090;GO:0031974;GO:0031982;GO:0031983;GO:0034774;GO:0043226;GO:0043227;GO:0043229;GO:0043230;GO:0043231;GO:0043233;GO:0060205;GO:0065010;GO:0070013;GO:0070062;GO:0098588;GO:0110165;GO:1903561;GO:1904813	1461	1470	14.4841	13.1783	15.6742	12.3298	15.4412	15.0158	15.0368	13.6322	15.4444	13.7816	16.1591	14.9399	16.2516	15.4599	16.3828	16.0083	17.7028	14.3221	16.2808	14.2086	12.126	13.5927	17.3505	14.8534	16.4407	11.7096	15.0674	15.1622	18.1241	14.8102	17.5403	15.289	15.7603	13.5989	17.159
+	8.5168	1.76067	TVIVFPNTSIK[54.0106]	sp|Q6TUQ9|A18_YMTV5	11K(54.0106)	Q6TUQ9	A18_YMTV5	110R	Transcript termination protein A18				422	432	16.821	16.6859	17.8566	15.9858	18.9254	16.9866	17.8461	18.1816	18.7227	15.8083	18.7334	17.1771	18.4125	16.2324	20.7544	18.7748	16.1297	13.7752	19.3846	19.2902	17.9547	16.4792	16.6153	16.6806	15.6711	12.4526	14.8317	14.9118	16.4248	15.926	15.8115	14.5347	18.5869	16.8791	17.0431
+	12.2945	1.75883	HTK[54.0106]ELNCRTASC[125.0477]SNVTC[130.0791]WLK	sp|P17301|ITA2_HUMAN	12C(125.0477),17C(130.0791),3K(54.0106)	P17301	ITA2_HUMAN	ITGA2	Integrin alpha-2	GO:0001666;GO:0002682;GO:0002684;GO:0002685;GO:0002687;GO:0006417;GO:0006929;GO:0006937;GO:0006940;GO:0006950;GO:0006970;GO:0006971;GO:0007044;GO:0007155;GO:0007160;GO:0007165;GO:0007166;GO:0007229;GO:0007565;GO:0007584;GO:0007596;GO:0007599;GO:0008284;GO:0009410;GO:0009581;GO:0009582;GO:0009605;GO:0009612;GO:0009628;GO:0009653;GO:0009719;GO:0009725;GO:0009743;GO:0009887;GO:0009889;GO:0009891;GO:…	GO:0001540;GO:0001618;GO:0004888;GO:0005102;GO:0005178;GO:0005488;GO:0005515;GO:0005518;GO:0033218;GO:0038023;GO:0038064;GO:0042277;GO:0043167;GO:0043169;GO:0043236;GO:0043394;GO:0043395;GO:0044877;GO:0046872;GO:0050839;GO:0050840;GO:0060089;GO:0097367;GO:0098631;GO:0098634;GO:0098639;GO:0140272;GO:1901681	GO:0005886;GO:0005925;GO:0008305;GO:0009897;GO:0009986;GO:0016020;GO:0030054;GO:0030055;GO:0032991;GO:0034666;GO:0043235;GO:0043679;GO:0044306;GO:0045178;GO:0048471;GO:0070161;GO:0098552;GO:0098636;GO:0098793;GO:0098796;GO:0098797;GO:0098802;GO:0110165	1044	1063	13.7826	13.7693	17.0668	12.996	16.5043	12.1505	16.1118	13.9121	14.8457	12.7279	16.2773	12.4719	12.6017	11.9144	13.8851	11.7864	12.4028	12.2477	13.084	13.1095	12.3991	14.6847	13.2578	12.1341	15.8266	12.3308	14.1922	12.1573	16.7967	14.2717	13.2226	12.3823	12.8748	14.0623	12.6049
+	7.50833	1.75634	AVDALLTHCK[54.0106]	sp|O76021|RL1D1_HUMAN	10K(54.0106)	O76021	RL1D1_HUMAN	RSL1D1	Ribosomal L1 domain-containing protein 1	GO:0000470;GO:0001649;GO:0006139;GO:0006364;GO:0006396;GO:0006725;GO:0006807;GO:0008152;GO:0009987;GO:0016070;GO:0016072;GO:0019222;GO:0030154;GO:0031323;GO:0032502;GO:0032879;GO:0032880;GO:0034470;GO:0034641;GO:0034660;GO:0042981;GO:0043067;GO:0043170;GO:0044237;GO:0044238;GO:0046483;GO:0048869;GO:0050789;GO:0050794;GO:0060341;GO:0065007;GO:0071704;GO:0090304;GO:1901360;GO:2000772	GO:0003676;GO:0003723;GO:0003729;GO:0003730;GO:0005488;GO:0005515;GO:0045296;GO:0048027;GO:0050839;GO:0097159	GO:0005694;GO:0005730;GO:0015934;GO:0016020;GO:0022625;GO:0030684;GO:0030686;GO:0032991;GO:0043226;GO:0043228;GO:0043229;GO:0043232;GO:0044391;GO:0110165;GO:1990904	39	48	15.7928	16.7328	16.8321	15.9415	18.3586	16.7046	16.5873	17.2093	18.3956	16.7163	17.9285	16.1824	12.3021	13.4455	16.038	12.4575	16.8687	12.7639	16.6198	19.1926	12.2487	13.1412	16.7849	16.6879	17.0177	12.4128	17.3143	16.0978	17.6417	17.1933	16.4358	12.8535	19.2328	14.6859	18.2728
+	7.62622	1.7523	NFGK[54.0106]EFTPQM[15.9949]QAAYQK[54.0106]VVAGVANALAHK	sp|P02042|HBD_HUMAN	10M(15.9949),16K(54.0106),4K(54.0106)	P02042	HBD_HUMAN	HBD	Hemoglobin subunit delta	GO:0006810;GO:0008152;GO:0009056;GO:0009987;GO:0015669;GO:0015670;GO:0015671;GO:0019755;GO:0042743;GO:0042744;GO:0044237;GO:0044248;GO:0051179;GO:0051234;GO:0071702;GO:0071704;GO:0072593;GO:0098754;GO:0098869;GO:1901575;GO:1990748	GO:0005344;GO:0005488;GO:0005515;GO:0019825;GO:0020037;GO:0030492;GO:0031721;GO:0036094;GO:0043167;GO:0043169;GO:0043177;GO:0046872;GO:0046906;GO:0097159;GO:0140104	GO:0005829;GO:0005833;GO:0031838;GO:0032991;GO:0072562;GO:0110165	118	145	14.9964	15.5776	16.2926	16.5079	18.0854	13.0559	17.7506	13.7634	18.388	16.229	17.1479	13.4547	12.5107	12.1683	15.4943	13.9337	15.2594	12.1426	15.1872	18.4168	17.8674	12.6607	15.3902	16.6453	12.0422	12.4848	12.7637	15.3483	17.2021	15.821	14.8245	12.6396	16.9613	11.9721	15.6678
+	8.02595	1.74984	ADIGIAMGIAGSDAAK[54.0106]	sp|P54707|AT12A_HUMAN	16K(54.0106)	P54707	AT12A_HUMAN	ATP12A	Potassium-transporting ATPase alpha chain 2	GO:0006810;GO:0006811;GO:0006812;GO:0006813;GO:0006814;GO:0006873;GO:0006883;GO:0006885;GO:0009987;GO:0019725;GO:0030001;GO:0030003;GO:0030007;GO:0034220;GO:0035725;GO:0036376;GO:0042592;GO:0048878;GO:0050801;GO:0051179;GO:0051234;GO:0055075;GO:0055078;GO:0055080;GO:0055082;GO:0055085;GO:0065007;GO:0071805;GO:0098655;GO:0098657;GO:0098659;GO:0098660;GO:0098662;GO:0098739;GO:0098771;GO:0099587;GO:…	GO:0000166;GO:0003824;GO:0005215;GO:0005391;GO:0005488;GO:0005524;GO:0008324;GO:0008553;GO:0008554;GO:0008556;GO:0008900;GO:0015075;GO:0015078;GO:0015079;GO:0015081;GO:0015318;GO:0015399;GO:0015662;GO:0016462;GO:0016787;GO:0016817;GO:0016818;GO:0016887;GO:0017076;GO:0017111;GO:0019829;GO:0022804;GO:0022853;GO:0022857;GO:0022890;GO:0030554;GO:0032553;GO:0032555;GO:0032559;GO:0035639;GO:0036094;GO:…	GO:0005829;GO:0005856;GO:0005886;GO:0005889;GO:0015629;GO:0016020;GO:0016323;GO:0016324;GO:0032991;GO:0043226;GO:0043228;GO:0043229;GO:0043232;GO:0090533;GO:0098533;GO:0098590;GO:0098796;GO:0098797;GO:0110165;GO:1902495;GO:1990351	743	758	15.3501	13.4389	16.2764	13.0131	13.3137	15.3562	13.6701	12.9914	15.4082	14.1286	12.9314	15.4303	16.64	15.8373	13.1246	16.2688	17.559	14.6066	15.7543	13.538	11.9292	13.5193	16.9537	15.6622	16.4553	12.0778	15.7992	15.1581	18.2395	15.3006	17.6838	15.0892	12.8773	14.1948	17.9824
+	8.87923	1.7488	EVQAVLLTDILVFLQEK[54.0106]	sp|Q12802|AKP13_HUMAN	17K(54.0106)	Q12802	AKP13_HUMAN	AKAP13	A-kinase anchor protein 13	GO:0007165;GO:0007186;GO:0007188;GO:0007189;GO:0007507;GO:0009966;GO:0009967;GO:0009987;GO:0010646;GO:0010647;GO:0023051;GO:0023056;GO:0030154;GO:0032502;GO:0032956;GO:0032970;GO:0033043;GO:0035023;GO:0035025;GO:0035051;GO:0042692;GO:0043122;GO:0043123;GO:0046578;GO:0046579;GO:0048513;GO:0048518;GO:0048522;GO:0048583;GO:0048584;GO:0048856;GO:0048869;GO:0050789;GO:0050794;GO:0051056;GO:0051057;GO:…	GO:0005078;GO:0005085;GO:0005488;GO:0005515;GO:0019899;GO:0030234;GO:0030674;GO:0030695;GO:0031267;GO:0035591;GO:0043167;GO:0043169;GO:0046872;GO:0051018;GO:0051020;GO:0060090;GO:0060589;GO:0098772	GO:0005634;GO:0005737;GO:0005829;GO:0005938;GO:0016020;GO:0043226;GO:0043227;GO:0043229;GO:0043231;GO:0110165	2249	2265	16.0863	16.5681	16.6627	13.4362	18.3529	16.9882	17.6215	15.3241	13.5998	12.4015	16.4785	15.3696	16.0896	14.7888	18.2193	15.9433	16.0259	15.2019	18.2021	18.8014	12.7944	12.357	15.9525	16.7077	17.0402	12.9729	17.7949	15.2936	17.6295	16.1301	15.9615	15.7719	17.0594	13.0194	14.2081
+	2.26387	1.74576	AFSPGLPPQSC[125.0477]SLNLKQDSYK[54.0106]K[54.0106]	sp|Q8N6M3|FITM2_HUMAN	11C(125.0477),21K(54.0106),22K(54.0106)	Q8N6M3	FITM2_HUMAN	FITM2	Acyl-coenzyme A diphosphatase FITM2	GO:0006139;GO:0006163;GO:0006195;GO:0006629;GO:0006637;GO:0006644;GO:0006725;GO:0006753;GO:0006790;GO:0006793;GO:0006796;GO:0006807;GO:0006996;GO:0007010;GO:0008152;GO:0008610;GO:0008654;GO:0009056;GO:0009058;GO:0009117;GO:0009150;GO:0009154;GO:0009166;GO:0009259;GO:0009261;GO:0009889;GO:0009987;GO:0010866;GO:0010883;GO:0010884;GO:0010889;GO:0010890;GO:0016042;GO:0016043;GO:0019216;GO:0019222;GO:…	GO:0005488;GO:0008289;GO:0017129;GO:0019992	GO:0005789;GO:0016020;GO:0031090;GO:0110165	241	262	21.3708	20.6659	20.8234	19.892	21.1159	20.5133	13.0527	11.4973	14.3323	19.7518	20.6991	19.9476	13.2194	13.6919	20.6845	11.7726	19.9896	11.8646	20.8317	13.4459	11.6801	21.328	20.3779	20.469	20.3236	12.2283	14.3462	13.7242	20.6519	12.8823	12.9436	12.147	21.0778	12.5969	20.3689
+	2.22062	1.73551	GR[54.0106]LDSELR[54.0106]GMQDLVEDFK	sp|P02538|K2C6A_HUMAN	2R(54.0106),8R(54.0106)	P02538	K2C6A_HUMAN	KRT6A	Keratin, type II cytoskeletal 6A	GO:0001906;GO:0002009;GO:0002376;GO:0006950;GO:0006952;GO:0006955;GO:0006959;GO:0006996;GO:0007010;GO:0008284;GO:0009605;GO:0009607;GO:0009611;GO:0009617;GO:0009653;GO:0009987;GO:0016043;GO:0019730;GO:0030154;GO:0031424;GO:0031640;GO:0032501;GO:0032502;GO:0042060;GO:0042127;GO:0042742;GO:0043207;GO:0043903;GO:0044419;GO:0045103;GO:0045104;GO:0045109;GO:0048518;GO:0048519;GO:0048522;GO:0048729;GO:…	GO:0005198;GO:0005200;GO:0030280	GO:0005634;GO:0005829;GO:0005882;GO:0016020;GO:0031982;GO:0043226;GO:0043227;GO:0043229;GO:0043230;GO:0043231;GO:0045095;GO:0065010;GO:0070062;GO:0099080;GO:0099081;GO:0099512;GO:0099513;GO:0110165;GO:1903561	233	250	13.1648	14.2784	20.5163	19.0652	12.7878	20.3206	19.0451	17.9282	13.6326	18.9457	12.3096	19.9229	19.9048	20.0867	12.6554	18.4476	18.2929	17.3368	13.5288	13.2788	11.6877	19.3429	21.1222	18.4168	22.0589	17.2905	19.7725	18.0617	22.2021	21.2261	22.4373	18.4705	11.2423	13.6738	21.5388
+	8.3429	1.73501	K[54.0106]PTSTDGPGQDAPGAESAGEPGEEAQALLEGFEGEM[15.9949]DMR[54.0106]	sp|Q8WYR4|RSPH1_HUMAN	1K(54.0106),36M(15.9949),39R(54.0106)	Q8WYR4	RSPH1_HUMAN	RSPH1	Radial spoke head 1 homolog	GO:0000226;GO:0001578;GO:0003006;GO:0006996;GO:0007010;GO:0007017;GO:0007049;GO:0007281;GO:0007286;GO:0009987;GO:0016043;GO:0022412;GO:0022414;GO:0022607;GO:0032502;GO:0035082;GO:0048468;GO:0048856;GO:0048869;GO:0051321;GO:0071840		GO:0000228;GO:0000793;GO:0000794;GO:0001520;GO:0001535;GO:0005634;GO:0005694;GO:0005819;GO:0005829;GO:0005929;GO:0031514;GO:0032991;GO:0042995;GO:0043226;GO:0043227;GO:0043228;GO:0043229;GO:0043231;GO:0043232;GO:0072687;GO:0099080;GO:0099081;GO:0099512;GO:0099513;GO:0110165;GO:0120025;GO:0120336;GO:0120338	227	265	12.2348	13.2627	13.0981	13.4417	12.9702	14.1448	16.8653	12.8576	14.5825	12.4682	15.421	13.6	15.1241	12.607	17.8511	15.2308	16.8452	11.774	16.7884	11.922	12.0843	12.7932	15.8775	12.4649	17.2435	12.1452	12.8716	12.2255	16.4143	12.7509	19.4941	16.2847	15.6179	14.1901	15.7923
+	3.34235	1.732	CK[54.0106]SQSGGKFTC[130.0791]DCNK	sp|P78504|JAG1_HUMAN	11C(130.0791),2K(54.0106)	P78504	JAG1_HUMAN	JAG1	Protein jagged-1	GO:0001525;GO:0001709;GO:0001952;GO:0001953;GO:0001974;GO:0002009;GO:0002011;GO:0002064;GO:0002065;GO:0002085;GO:0002250;GO:0002252;GO:0002376;GO:0002443;GO:0002449;GO:0002456;GO:0002460;GO:0002682;GO:0003179;GO:0003180;GO:0003184;GO:0003206;GO:0003208;GO:0003215;GO:0006355;GO:0006357;GO:0006955;GO:0007162;GO:0007165;GO:0007166;GO:0007219;GO:0007399;GO:0008593;GO:0009653;GO:0009888;GO:0009889;GO:…	GO:0005102;GO:0005112;GO:0005198;GO:0005488;GO:0005509;GO:0005515;GO:0005543;GO:0008083;GO:0008289;GO:0030545;GO:0030546;GO:0043167;GO:0043169;GO:0046872;GO:0048018;GO:0060090;GO:0098772;GO:0140677	GO:0005576;GO:0005886;GO:0005911;GO:0005912;GO:0016020;GO:0016324;GO:0030054;GO:0070161;GO:0098590;GO:0110165	605	619	22.5094	12.5832	22.365	12.7105	22.9879	21.7063	22.6144	12.9727	22.3623	13.0326	21.8802	12.9868	13.508	12.3025	21.9212	13.0462	12.6757	11.011	21.2755	13.4537	11.1503	13.1023	13.5155	12.5008	12.6749	12.3184	22.1377	14.1841	13.2771	13.5448	12.9569	12.6136	11.8187	11.7179	12.3337
+	7.16853	1.72786	TKDAIDMYTQAGR[54.0106]	sp|Q9UG01|IF172_HUMAN	13R(54.0106)	Q9UG01	IF172_HUMAN	IFT172	Intraflagellar transport protein 172 homolog	GO:0000226;GO:0001843;GO:0001947;GO:0002009;GO:0003002;GO:0003143;GO:0006508;GO:0006807;GO:0006810;GO:0006996;GO:0007010;GO:0007017;GO:0007018;GO:0007165;GO:0007166;GO:0007219;GO:0007224;GO:0007389;GO:0007420;GO:0008152;GO:0008283;GO:0008285;GO:0008544;GO:0008589;GO:0009653;GO:0009798;GO:0009887;GO:0009888;GO:0009953;GO:0009966;GO:0009967;GO:0009968;GO:0009987;GO:0010646;GO:0010647;GO:0010648;GO:…		GO:0005815;GO:0005929;GO:0005930;GO:0030992;GO:0031410;GO:0031982;GO:0032991;GO:0036064;GO:0042995;GO:0043226;GO:0043227;GO:0043229;GO:0043230;GO:0043231;GO:0065010;GO:0097225;GO:0097228;GO:0097542;GO:0097598;GO:0097708;GO:0110165;GO:0120025;GO:1903561	941	953	13.4398	12.9016	12.3283	13.7692	13.8348	13.275	13.1972	12.5193	13.6137	13.2994	12.6929	11.9843	12.7948	12.8213	14.4342	12.596	12.462	12.1574	12.8887	14.7336	12.2619	13.8215	13.7265	12.5557	13.3546	12.1469	12.4054	11.9953	16.8911	11.882	12.1508	13.7662	18.0935	12.8258	13.8632
+	2.65075	1.72452	QHQGNK[54.0106]DAK[54.0106]DK[54.0106]	sp|Q9NUQ6|SPS2L_HUMAN	11K(54.0106),6K(54.0106),9K(54.0106)	Q9NUQ6	SPS2L_HUMAN	SPATS2L	SPATS2-like protein		GO:0003676;GO:0003723;GO:0005488;GO:0097159	GO:0005654;GO:0005730;GO:0005737;GO:0005829;GO:0032991;GO:0043226;GO:0043228;GO:0043229;GO:0043232;GO:0110165	77	87	17.6498	22.1292	18.4687	16.1725	19.1073	17.7788	18.4105	18.7056	12.839	16.4549	19.4683	20.6101	20.0533	18.4904	19.4243	12.6142	13.2446	12.7276	17.9283	15.5258	18.8723	18.0959	18.4503	12.5895	21.4804	17.8512	11.261	13.0189	16.3845	12.3866	16.1908	19.9384	19.1433	13.0415	18.6467
+	10.9193	1.72235	GTFATLSELHC[125.0477]DK[54.0106]LHVDPENFR	sp|P68871|HBB_HUMAN	11C(125.0477),13K(54.0106)	P68871	HBB_HUMAN	HBB	Hemoglobin subunit beta	GO:0000302;GO:0003008;GO:0003013;GO:0003014;GO:0003018;GO:0006810;GO:0006950;GO:0006979;GO:0007155;GO:0008152;GO:0008217;GO:0009056;GO:0009889;GO:0009891;GO:0009893;GO:0009987;GO:0010033;GO:0010035;GO:0015669;GO:0015670;GO:0015671;GO:0019222;GO:0019755;GO:0030185;GO:0031323;GO:0031325;GO:0031326;GO:0031328;GO:0032501;GO:0034109;GO:0035150;GO:0035296;GO:0042221;GO:0042542;GO:0042743;GO:0042744;GO:…	GO:0005344;GO:0005488;GO:0005515;GO:0019825;GO:0020037;GO:0030492;GO:0031721;GO:0036094;GO:0043167;GO:0043169;GO:0043177;GO:0046872;GO:0046906;GO:0097159;GO:0140104	GO:0005576;GO:0005615;GO:0005829;GO:0005833;GO:0031838;GO:0031974;GO:0031982;GO:0032991;GO:0043226;GO:0043227;GO:0043230;GO:0043233;GO:0065010;GO:0070013;GO:0070062;GO:0071682;GO:0072562;GO:0110165;GO:1903561;GO:1904724;GO:1904813	84	105	15.7367	16.1988	15.8315	15.7096	17.147	15.7407	16.6492	15.2893	16.6013	15.5248	16.1074	14.9245	12.1298	13.2181	16.3333	12.3171	14.5758	11.124	16.7962	17.9328	15.9675	15.6383	15.6781	15.9509	16.0141	12.1418	16.0849	15.3196	15.9963	16.1185	15.6463	14.1452	17.3003	14.3761	15.8651
+	4.20528	1.71558	K[54.0106]PAPPPAPPQATK	sp|Q86VM9|ZCH18_HUMAN	1K(54.0106)	Q86VM9	ZCH18_HUMAN	ZC3H18	Zinc finger CCCH domain-containing protein 18	GO:0009889;GO:0009893;GO:0009894;GO:0009896;GO:0010468;GO:0010556;GO:0010604;GO:0010608;GO:0019219;GO:0019222;GO:0031323;GO:0031325;GO:0031326;GO:0031329;GO:0031331;GO:0043487;GO:0045935;GO:0048518;GO:0048522;GO:0050779;GO:0050789;GO:0050794;GO:0051171;GO:0051173;GO:0051252;GO:0051254;GO:0060255;GO:0065007;GO:0065008;GO:0080090	GO:0003676;GO:0003723;GO:0005488;GO:0030674;GO:0043167;GO:0043169;GO:0044877;GO:0046872;GO:0060090;GO:0097159;GO:0140262	GO:0016604;GO:0016607;GO:0032991;GO:0110165;GO:1990904	639	651	14.6604	13.237	14.4951	13.6443	21.73	13.2438	21.3738	12.4234	13.7993	13.451	20.1953	13.4259	12.7018	12.3362	20.5822	12.3575	13.8418	11.5337	21.1572	21.897	13.2971	14.0921	13.4929	19.9009	19.7404	12.3525	20.2331	13.0379	18.1158	12.3896	13.7114	13.5242	20.6069	12.9497	13.5572
+	6.37171	1.71302	ATVHIQVNDVNEYAPVFK[54.0106]EK[54.0106]SYK[54.0106]	sp|O94985|CSTN1_HUMAN	18K(54.0106),20K(54.0106),23K(54.0106)	O94985	CSTN1_HUMAN	CLSTN1	Calsyntenin-1	GO:0001558;GO:0006810;GO:0007155;GO:0007156;GO:0008104;GO:0009987;GO:0010646;GO:0010647;GO:0015031;GO:0016192;GO:0023051;GO:0023056;GO:0031503;GO:0033036;GO:0035418;GO:0040008;GO:0044087;GO:0044089;GO:0045184;GO:0048518;GO:0048522;GO:0050789;GO:0050793;GO:0050794;GO:0050804;GO:0050806;GO:0050807;GO:0051094;GO:0051128;GO:0051130;GO:0051179;GO:0051234;GO:0051239;GO:0051240;GO:0051641;GO:0051668;GO:…	GO:0001540;GO:0005488;GO:0005509;GO:0005515;GO:0008092;GO:0019894;GO:0033218;GO:0042277;GO:0042988;GO:0043167;GO:0043169;GO:0046872	GO:0000139;GO:0005576;GO:0005634;GO:0005768;GO:0005789;GO:0009986;GO:0014069;GO:0016020;GO:0030054;GO:0031090;GO:0031410;GO:0031982;GO:0042995;GO:0043005;GO:0043226;GO:0043227;GO:0043229;GO:0043231;GO:0045202;GO:0045211;GO:0097060;GO:0097708;GO:0098588;GO:0098590;GO:0098845;GO:0098978;GO:0099572;GO:0110165;GO:0120025	148	170	13.2167	12.9406	12.4857	13.2228	12.8616	12.4899	13.1359	12.9762	13.1236	12.2149	12.9007	12.912	13.4282	13.7146	18.8181	12.9361	12.3198	12.0755	11.2178	13.6083	11.4032	12.452	13.6452	12.5574	12.3614	11.2934	13.9238	13.0471	12.2428	12.8412	13.0563	13.1688	19.7754	13.3915	13.2699
+	9.112	1.70498	DC[125.0477]K[54.0106]FLILEK	sp|Q9UMD9|COHA1_HUMAN	2C(125.0477),3K(54.0106)	Q9UMD9	COHA1_HUMAN	COL17A1	Collagen alpha-1(XVII) chain	GO:0007044;GO:0007155;GO:0007160;GO:0008544;GO:0009888;GO:0009987;GO:0016043;GO:0022607;GO:0030198;GO:0031581;GO:0031589;GO:0032502;GO:0034329;GO:0034330;GO:0043062;GO:0045229;GO:0048856;GO:0071840;GO:0150115	GO:0005198;GO:0005201;GO:0005488;GO:0005539;GO:0008201;GO:0030020;GO:0097367;GO:1901681	GO:0005576;GO:0005581;GO:0005604;GO:0005615;GO:0005788;GO:0005886;GO:0005911;GO:0016020;GO:0030054;GO:0030055;GO:0030056;GO:0030312;GO:0031012;GO:0031974;GO:0032991;GO:0043233;GO:0062023;GO:0070013;GO:0070161;GO:0110165	341	349	16.9356	14.135	16.9637	12.3605	13.2656	12.842	12.8697	13.445	13.4076	13.6543	15.1528	13.2196	12.2569	12.5581	14.9081	12.9778	15.1783	12.2948	11.703	13.2748	13.7025	13.6504	16.7206	15.7029	14.9	12.0149	14.8995	13.9862	16.6068	16.7651	16.2865	13.5216	15.8775	12.2066	16.5479
+	8.23088	1.70262	VLC[125.0477]LHLK[54.0106]	sp|Q9Y6I4|UBP3_HUMAN	3C(125.0477),7K(54.0106)	Q9Y6I4	UBP3_HUMAN	USP3	Ubiquitin carboxyl-terminal hydrolase 3	GO:0000122;GO:0006139;GO:0006259;GO:0006281;GO:0006325;GO:0006338;GO:0006355;GO:0006357;GO:0006508;GO:0006725;GO:0006807;GO:0006950;GO:0006974;GO:0007049;GO:0008152;GO:0009889;GO:0009890;GO:0009892;GO:0009987;GO:0010468;GO:0010556;GO:0010558;GO:0010605;GO:0016043;GO:0019219;GO:0019222;GO:0019538;GO:0031323;GO:0031324;GO:0031326;GO:0031327;GO:0033554;GO:0034641;GO:0043170;GO:0043933;GO:0044237;GO:…	GO:0000976;GO:0000977;GO:0000978;GO:0000987;GO:0001067;GO:0003676;GO:0003677;GO:0003682;GO:0003690;GO:0003824;GO:0004843;GO:0005488;GO:0005515;GO:0008233;GO:0008234;GO:0008270;GO:0016787;GO:0019783;GO:0042393;GO:0043167;GO:0043169;GO:0043565;GO:0044877;GO:0046872;GO:0046914;GO:0097159;GO:0101005;GO:0140096;GO:1990837;GO:1990841	GO:0000785;GO:0005634;GO:0005654;GO:0005737;GO:0032991;GO:0032993;GO:0035770;GO:0036464;GO:0043226;GO:0043227;GO:0043228;GO:0043229;GO:0043231;GO:0043232;GO:0090543;GO:0099080;GO:0110165	406	412	14.115	15.928	15.695	14.0479	17.6424	15.2294	15.8566	13.1721	16.2528	13.4931	16.9565	15.9673	13.7372	15.1418	17.8312	16.7289	12.2521	12.2473	17.2451	18.3316	13.1705	14.4912	14.8476	17.709	13.6591	12.771	15.7739	13.2173	15.2055	12.75	13.2149	12.4842	17.4893	12.9833	15.9659
+	5.49003	1.70242	VM[15.9949]C[130.0791]IEHEIK[54.0106]	sp|P42224|STAT1_HUMAN	2M(15.9949),3C(130.0791),9K(54.0106)	P42224	STAT1_HUMAN	STAT1	Signal transducer and activator of transcription 1-alpha/beta	GO:0000122;GO:0000302;GO:0001817;GO:0001819;GO:0001936;GO:0001937;GO:0002053;GO:0002230;GO:0002682;GO:0002831;GO:0003008;GO:0003013;GO:0003339;GO:0003340;GO:0006355;GO:0006357;GO:0006950;GO:0006952;GO:0006979;GO:0007165;GO:0007166;GO:0007259;GO:0007584;GO:0008015;GO:0008283;GO:0008284;GO:0008285;GO:0009410;GO:0009605;GO:0009607;GO:0009612;GO:0009615;GO:0009628;GO:0009719;GO:0009725;GO:0009888;GO:…	GO:0000976;GO:0000977;GO:0000978;GO:0000979;GO:0000981;GO:0000987;GO:0001046;GO:0001067;GO:0001221;GO:0001222;GO:0001223;GO:0001664;GO:0003676;GO:0003677;GO:0003682;GO:0003690;GO:0003700;GO:0005102;GO:0005126;GO:0005164;GO:0005488;GO:0005515;GO:0008134;GO:0016922;GO:0019899;GO:0019902;GO:0019903;GO:0031730;GO:0032813;GO:0035035;GO:0042379;GO:0042393;GO:0042802;GO:0042803;GO:0043565;GO:0044389;GO:…	GO:0000785;GO:0005634;GO:0005654;GO:0005667;GO:0005730;GO:0005737;GO:0005829;GO:0030424;GO:0030425;GO:0032991;GO:0032993;GO:0042995;GO:0043005;GO:0043226;GO:0043227;GO:0043228;GO:0043229;GO:0043231;GO:0043232;GO:0048471;GO:0070721;GO:0090575;GO:0110165;GO:0120025;GO:0140513	153	161	17.4128	17.6634	17.1934	16.4694	13.9494	16.9704	18.0813	11.3549	18.3486	13.6649	17.6065	13.981	13.3236	13.2267	17.2761	12.0401	12.7382	12.889	17.8124	18.797	12.4497	13.7161	12.7417	17.6346	13.2554	12.5143	17.4825	13.1506	13.9359	11.4101	12.5632	12.5978	18.5149	13.1648	17.9391
+	7.7538	1.70035	IAVTGTGAHPAFK[54.0106]YLAQTSGK[54.0106]	sp|Q96SL4|GPX7_HUMAN	13K(54.0106),21K(54.0106)	Q96SL4	GPX7_HUMAN	GPX7	Glutathione peroxidase 7	GO:0006950;GO:0006979;GO:0009987;GO:0033554;GO:0034599;GO:0042221;GO:0050896;GO:0051716;GO:0062197;GO:0070887	GO:0003824;GO:0004096;GO:0004601;GO:0004602;GO:0016209;GO:0016491;GO:0016684	GO:0005576;GO:0005783;GO:0005788;GO:0031974;GO:0043226;GO:0043227;GO:0043229;GO:0043231;GO:0043233;GO:0070013;GO:0110165	118	138	14.0316	16.6075	12.6603	13.806	13.3991	12.2626	13.2246	13.1245	13.7504	13.5622	13.7784	12.8257	15.4083	13.7505	13.6465	16.2752	16.2203	13.2044	12.4031	14.4175	11.8352	12.9535	13.6443	15.2994	17.2287	12.4018	12.7849	14.9473	15.9769	17.5714	16.6867	11.9286	13.3486	12.743	16.8458
+	3.54795	1.69222	GEQNGQEEK[54.0106]WC[125.0477]EK	sp|P84022|SMAD3_HUMAN	11C(125.0477),9K(54.0106)	P84022	SMAD3_HUMAN	SMAD3	Mothers against decapentaplegic homolog 3	GO:0000122;GO:0000165;GO:0001558;GO:0001657;GO:0001666;GO:0001701;GO:0001704;GO:0001707;GO:0001756;GO:0001775;GO:0001817;GO:0001819;GO:0001889;GO:0001947;GO:0001952;GO:0001954;GO:0002009;GO:0002076;GO:0002376;GO:0002520;GO:0002682;GO:0003002;GO:0003143;GO:0006139;GO:0006355;GO:0006357;GO:0006396;GO:0006725;GO:0006807;GO:0006919;GO:0006950;GO:0006955;GO:0007165;GO:0007166;GO:0007167;GO:0007178;GO:…	GO:0000976;GO:0000977;GO:0000978;GO:0000981;GO:0000987;GO:0001067;GO:0001216;GO:0001217;GO:0001221;GO:0001222;GO:0001223;GO:0001228;GO:0003676;GO:0003677;GO:0003682;GO:0003690;GO:0003700;GO:0005102;GO:0005126;GO:0005160;GO:0005488;GO:0005515;GO:0005518;GO:0008013;GO:0008134;GO:0008270;GO:0016922;GO:0017151;GO:0019899;GO:0019900;GO:0019901;GO:0019902;GO:0031490;GO:0031625;GO:0031962;GO:0032182;GO:…	GO:0000785;GO:0005634;GO:0005637;GO:0005654;GO:0005667;GO:0005737;GO:0005829;GO:0005886;GO:0016020;GO:0019866;GO:0031090;GO:0031965;GO:0032991;GO:0032993;GO:0043226;GO:0043227;GO:0043229;GO:0043231;GO:0043235;GO:0071141;GO:0071144;GO:0090575;GO:0110165;GO:0140513	21	33	13.1877	13.4158	12.9425	12.3267	13.8682	12.341	13.2996	12.7309	13.4412	12.8644	13.6864	11.8333	13.0973	12.8021	13.3615	13.2436	12.1776	11.6115	13.1766	13.0802	12.5781	14.0683	14.0524	12.5423	19.197	12.8069	13.1722	12.0057	12.8498	13.9916	13.1108	12.0514	12.5311	12.0325	13.1994
+	5.01741	1.68313	SPFVVQVGEAC[130.0791]NPNAC[130.0791]RASGRGLQPK[54.0106]	sp|O75369|FLNB_HUMAN	11C(130.0791),16C(130.0791),26K(54.0106)	O75369	FLNB_HUMAN	FLNB	Filamin-B	GO:0000902;GO:0002064;GO:0003334;GO:0003382;GO:0006996;GO:0007010;GO:0007165;GO:0007519;GO:0009653;GO:0009888;GO:0009987;GO:0010033;GO:0016043;GO:0030029;GO:0030036;GO:0032502;GO:0034097;GO:0034341;GO:0042221;GO:0048468;GO:0048856;GO:0048869;GO:0050789;GO:0050794;GO:0050896;GO:0051716;GO:0060537;GO:0065007;GO:0070887;GO:0071310;GO:0071345;GO:0071346;GO:0071840	GO:0003676;GO:0003723;GO:0003779;GO:0005488;GO:0005515;GO:0008092;GO:0042802;GO:0044877;GO:0045296;GO:0050839;GO:0051015;GO:0097159	GO:0001725;GO:0005737;GO:0005829;GO:0005856;GO:0005886;GO:0005903;GO:0005925;GO:0005938;GO:0015629;GO:0016020;GO:0030018;GO:0030054;GO:0030055;GO:0030139;GO:0031410;GO:0031982;GO:0032432;GO:0042641;GO:0043226;GO:0043227;GO:0043228;GO:0043229;GO:0043230;GO:0043231;GO:0043232;GO:0045335;GO:0065010;GO:0070062;GO:0070161;GO:0097517;GO:0097708;GO:0098862;GO:0110165;GO:1903561	440	465	13.1041	13.6333	17.2952	13.7347	13.4331	13.0738	12.65	12.4745	14.262	13.4798	13.7207	12.8101	12.2532	12.2097	13.3184	12.5715	13.2298	11.2719	12.2219	13.867	12.185	12.8183	13.3194	12.582	18.3576	12.1672	14.671	12.5758	18.51	17.4983	13.6412	12.8866	12.8206	11.6773	13.1491
+	4.38408	1.66594	R[54.0106]MSDHRPAMGYHGQGPSDHYR	sp|O14647|CHD2_HUMAN	1R(54.0106)	O14647	CHD2_HUMAN	CHD2	Chromodomain-helicase-DNA-binding protein 2	GO:0002244;GO:0006325;GO:0006338;GO:0006355;GO:0006357;GO:0006950;GO:0006974;GO:0007517;GO:0008152;GO:0009058;GO:0009059;GO:0009889;GO:0009987;GO:0010467;GO:0010468;GO:0010556;GO:0016043;GO:0019219;GO:0019222;GO:0030154;GO:0031323;GO:0031326;GO:0032502;GO:0033554;GO:0034728;GO:0043170;GO:0043933;GO:0044237;GO:0044249;GO:0048513;GO:0048856;GO:0048863;GO:0048869;GO:0050789;GO:0050794;GO:0050896;GO:…	GO:0000166;GO:0000976;GO:0000977;GO:0000978;GO:0000987;GO:0001067;GO:0003676;GO:0003677;GO:0003682;GO:0003690;GO:0003723;GO:0003824;GO:0004386;GO:0005488;GO:0005515;GO:0005524;GO:0008094;GO:0016462;GO:0016787;GO:0016817;GO:0016818;GO:0016887;GO:0017076;GO:0017111;GO:0030554;GO:0032553;GO:0032555;GO:0032559;GO:0035639;GO:0036094;GO:0042393;GO:0043167;GO:0043168;GO:0043565;GO:0044877;GO:0097159;GO:…	GO:0000785;GO:0005634;GO:0032991;GO:0032993;GO:0043226;GO:0043227;GO:0043229;GO:0043231;GO:0110165	1743	1763	13.8587	13.1386	17.5698	16.6528	16.7793	14.1347	16.6111	14.0825	12.9638	16.7316	16.9114	17.3971	16.3668	16.2359	15.794	14.263	14.1919	14.6429	12.5313	12.9439	12.8714	16.6627	17.5723	14.725	19.004	11.4213	16.9013	16.2294	18.3514	18.1921	19.5798	14.7054	12.932	12.0576	17.2399
+	11.3005	1.66303	GGLIDDIALIR[54.0106]	sp|Q7L273|KCTD9_HUMAN	11R(54.0106)	Q7L273	KCTD9_HUMAN	KCTD9	BTB/POZ domain-containing protein KCTD9	GO:0006807;GO:0007165;GO:0008152;GO:0009987;GO:0016043;GO:0016567;GO:0019538;GO:0022607;GO:0032446;GO:0035556;GO:0036211;GO:0043170;GO:0043412;GO:0043687;GO:0043933;GO:0044238;GO:0050789;GO:0050794;GO:0051259;GO:0051260;GO:0065003;GO:0065007;GO:0070647;GO:0071704;GO:0071840;GO:1901564	GO:0005488;GO:0005515;GO:0042802;GO:0043621;GO:0097602		47	57	16.9443	13.2328	16.2015	13.0976	16.3127	12.8903	15.3658	12.2508	14.6873	12.8111	16.9989	13.0372	13.2324	14.8996	16.12	14.6825	17.1046	14.7936	15.6046	14.7091	12.9709	14.3509	13.5759	15.3525	15.9411	15.4219	15.5403	13.0181	16.8849	15.2256	17.1687	13.7366	16.6372	12.4096	12.9867
+	7.57185	1.65903	FDGYVIDGATALWCAAGAGHFEVVK[54.0106]	sp|Q9UK73|FEM1B_HUMAN	25K(54.0106)	Q9UK73	FEM1B_HUMAN	FEM1B	Protein fem-1 homolog B	GO:0001763;GO:0002009;GO:0002070;GO:0003006;GO:0006508;GO:0006511;GO:0006807;GO:0006915;GO:0008152;GO:0008219;GO:0009056;GO:0009057;GO:0009653;GO:0009966;GO:0009987;GO:0010498;GO:0010564;GO:0010646;GO:0012501;GO:0016567;GO:0019538;GO:0019941;GO:0021700;GO:0022414;GO:0023051;GO:0030163;GO:0032446;GO:0032501;GO:0032502;GO:0036211;GO:0042981;GO:0043067;GO:0043161;GO:0043170;GO:0043412;GO:0043632;GO:…	GO:0005102;GO:0005123;GO:0005126;GO:0005488;GO:0005515;GO:0030674;GO:0032813;GO:0060090;GO:0140767;GO:1990756	GO:0000151;GO:0005634;GO:0005654;GO:0005737;GO:0005829;GO:0031461;GO:0031462;GO:0032991;GO:0043226;GO:0043227;GO:0043229;GO:0043231;GO:0110165;GO:0140535;GO:1902494;GO:1990234	81	105	11.0001	14.4977	15.6562	13.3599	14.8709	13.3853	14.9724	12.9321	13.973	12.4603	15.0198	14.2072	12.4581	13.0715	13.0961	13.0839	11.8666	11.8799	12.3442	14.8868	11.7139	13.8115	16.1224	13.1883	17.3562	12.9857	14.8509	14.6468	17.5369	16.4593	17.0184	12.6051	12.4571	12.5565	16.1359
+	5.04779	1.65463	KVLGAFSDGLAHLDNLK[54.0106]GTFSQLSELHCDK[54.0106]LHVDPENFR	sp|P02042|HBD_HUMAN	17K(54.0106),30K(54.0106)	P02042	HBD_HUMAN	HBD	Hemoglobin subunit delta	GO:0006810;GO:0008152;GO:0009056;GO:0009987;GO:0015669;GO:0015670;GO:0015671;GO:0019755;GO:0042743;GO:0042744;GO:0044237;GO:0044248;GO:0051179;GO:0051234;GO:0071702;GO:0071704;GO:0072593;GO:0098754;GO:0098869;GO:1901575;GO:1990748	GO:0005344;GO:0005488;GO:0005515;GO:0019825;GO:0020037;GO:0030492;GO:0031721;GO:0036094;GO:0043167;GO:0043169;GO:0043177;GO:0046872;GO:0046906;GO:0097159;GO:0140104	GO:0005829;GO:0005833;GO:0031838;GO:0032991;GO:0072562;GO:0110165	67	105	17.5134	13.7077	12.7038	13.2281	12.5634	13.1264	17.6192	12.8621	14.0987	13.2162	13.269	11.9792	12.7878	12.4639	12.8129	12.2274	13.1624	11.5109	15.6137	15.8637	11.0514	12.5516	17.677	16.9912	11.7958	13.2043	18.4009	17.1196	13.1077	12.3343	16.8108	12.2282	13.0635	12.7866	17.8655
+	5.36841	1.65135	PVSAR[54.0106]YSNVSSIEDSFAMEK	sp|O15231|ZN185_HUMAN	5R(54.0106)	O15231	ZN185_HUMAN	ZNF185	Zinc finger protein 185		GO:0005488;GO:0008270;GO:0043167;GO:0043169;GO:0046872;GO:0046914	GO:0005737;GO:0005856;GO:0005925;GO:0030054;GO:0030055;GO:0043226;GO:0043228;GO:0043229;GO:0043232;GO:0070161;GO:0110165	592	611	13.2083	13.9499	12.8049	13.0121	12.9817	14.4938	12.5302	11.9354	12.7689	13.1587	14.2011	14.2485	11.9519	12.8721	15.0416	11.8988	12.82	10.2591	12.7893	14.2611	12.2256	13.2275	12.8724	12.0552	12.7228	12.01	12.1428	12.2726	19.426	13.6411	12.5745	12.7929	13.3227	11.9132	13.1483
+	2.5696	1.65053	AAQIR[54.0106]SQVMTHLR[54.0106]	sp|P05067|A4_HUMAN	13R(54.0106),5R(54.0106)	P05067	A4_HUMAN	APP	Amyloid-beta precursor protein	GO:0000086;GO:0001774;GO:0001775;GO:0001817;GO:0001819;GO:0001932;GO:0001934;GO:0001967;GO:0002252;GO:0002263;GO:0002265;GO:0002269;GO:0002274;GO:0002376;GO:0002682;GO:0002684;GO:0002685;GO:0002687;GO:0003008;GO:0006066;GO:0006109;GO:0006110;GO:0006139;GO:0006140;GO:0006355;GO:0006357;GO:0006378;GO:0006396;GO:0006397;GO:0006417;GO:0006468;GO:0006629;GO:0006725;GO:0006793;GO:0006796;GO:0006807;GO:…	GO:0000976;GO:0000977;GO:0000978;GO:0000987;GO:0001067;GO:0003676;GO:0003677;GO:0003690;GO:0004857;GO:0004866;GO:0004867;GO:0005102;GO:0005488;GO:0005515;GO:0005539;GO:0008201;GO:0019899;GO:0019904;GO:0030234;GO:0030414;GO:0030545;GO:0030546;GO:0042802;GO:0043167;GO:0043169;GO:0043565;GO:0046872;GO:0046914;GO:0048018;GO:0051425;GO:0061134;GO:0061135;GO:0097159;GO:0097367;GO:0098772;GO:0140677;GO:…	GO:0005576;GO:0005615;GO:0005641;GO:0005737;GO:0005768;GO:0005769;GO:0005783;GO:0005788;GO:0005790;GO:0005794;GO:0005796;GO:0005798;GO:0005829;GO:0005886;GO:0005905;GO:0005911;GO:0008021;GO:0009986;GO:0016020;GO:0030054;GO:0030133;GO:0030134;GO:0030135;GO:0030424;GO:0030426;GO:0030427;GO:0031090;GO:0031093;GO:0031410;GO:0031594;GO:0031904;GO:0031970;GO:0031974;GO:0031982;GO:0031983;GO:0032588;GO:…	523	535	21.7837	21.8346	21.9483	21.6321	19.5766	22.083	19.0738	21.9337	20.2073	21.2702	14.8553	20.97	13.0148	18.2522	18.5687	19.7998	20.6547	19.6728	23.4663	24.8923	15.0096	21.9547	12.9268	16.5536	22.4345	17.3959	22.6495	20.4912	21.5847	20.9374	20.5126	19.1451	23.7868	17.7322	16.422
+	6.58716	1.64679	SLALQAEK[54.0106]K[54.0106]LLSK[54.0106]	sp|Q6P589|TP8L2_HUMAN	13K(54.0106),8K(54.0106),9K(54.0106)	Q6P589	TP8L2_HUMAN	TNFAIP8L2	Tumor necrosis factor alpha-induced protein 8-like protein 2	GO:0001775;GO:0002376;GO:0002682;GO:0002683;GO:0002694;GO:0002695;GO:0006950;GO:0006952;GO:0006955;GO:0007162;GO:0009605;GO:0009607;GO:0009987;GO:0022407;GO:0022408;GO:0030155;GO:0031347;GO:0031348;GO:0032101;GO:0032102;GO:0032501;GO:0042110;GO:0042981;GO:0043067;GO:0043207;GO:0044419;GO:0045087;GO:0045321;GO:0046649;GO:0048519;GO:0048523;GO:0048583;GO:0048585;GO:0050727;GO:0050728;GO:0050789;GO:…		GO:0005737;GO:0110165	8	20	12.4273	17.486	12.551	16.6257	18.462	12.755	13.2972	17.2814	20.1078	16.0579	17.9439	12.6997	13.6772	13.088	18.3605	13.4741	13.2494	11.873	13.2123	13.8419	11.8996	13.7252	13.8935	12.5375	16.8933	12.3097	17.8526	13.8224	17.3918	14.0428	13.7366	11.9688	17.4234	12.6879	13.8316
+	5.4037	1.64629	ITQNSAEEKEDSVDK[54.0106]TK[54.0106]	sp|O15021|MAST4_HUMAN	15K(54.0106),17K(54.0106)	O15021	MAST4_HUMAN	MAST4	Microtubule-associated serine/threonine-protein kinase 4	GO:0006508;GO:0006793;GO:0006796;GO:0006807;GO:0006996;GO:0007010;GO:0007165;GO:0008152;GO:0009987;GO:0016043;GO:0016310;GO:0019538;GO:0035556;GO:0043170;GO:0044237;GO:0044238;GO:0050789;GO:0050794;GO:0065007;GO:0071704;GO:0071840;GO:1901564	GO:0000166;GO:0000287;GO:0003824;GO:0004672;GO:0004674;GO:0005488;GO:0005524;GO:0016301;GO:0016740;GO:0016772;GO:0016773;GO:0017076;GO:0030554;GO:0032553;GO:0032555;GO:0032559;GO:0035639;GO:0036094;GO:0043167;GO:0043168;GO:0043169;GO:0046872;GO:0097159;GO:0097367;GO:0106310;GO:0140096;GO:1901265;GO:1901363	GO:0005737;GO:0110165	918	934	13.3056	14.5765	17.6793	13.3736	13.9415	12.2512	16.8157	12.3202	14.5274	13.8886	13.3008	13.5476	13.4984	16.4385	13.4194	16.6165	17.8064	15.0532	16.9848	15.0674	10.9751	13.41	17.698	17.326	17.6027	14.7555	17.4359	16.2695	17.631	17.6411	17.7771	15.2056	13.3206	12.097	16.7984
+	5.57675	1.64574	TYEAALETIQNM[15.9949]SK[54.0106]VVDSLYNK[54.0106]	sp|O00231|PSD11_HUMAN	12M(15.9949),14K(54.0106),22K(54.0106)	O00231	PSD11_HUMAN	PSMD11	26S proteasome non-ATPase regulatory subunit 11	GO:0006508;GO:0006511;GO:0006807;GO:0008152;GO:0009056;GO:0009057;GO:0009987;GO:0010498;GO:0016043;GO:0019538;GO:0019941;GO:0022607;GO:0030154;GO:0030163;GO:0032502;GO:0043161;GO:0043170;GO:0043248;GO:0043632;GO:0043933;GO:0044238;GO:0048863;GO:0048869;GO:0051603;GO:0065003;GO:0071704;GO:0071840;GO:1901564;GO:1901565;GO:1901575	GO:0005198	GO:0000502;GO:0005576;GO:0005634;GO:0005654;GO:0005829;GO:0008541;GO:0016020;GO:0022624;GO:0031974;GO:0031983;GO:0032991;GO:0034774;GO:0043226;GO:0043227;GO:0043229;GO:0043231;GO:0043233;GO:0060205;GO:0070013;GO:0110165;GO:0140535;GO:1902494;GO:1904813;GO:1905368;GO:1905369	396	417	13.869	13.6326	13.0993	13.5041	12.7338	13.2696	14.2273	12.4689	13.5072	12.6203	13.0024	12.7668	13.0665	12.9732	12.4928	12.0298	18.2367	13.0359	12.2817	13.8525	12.7628	12.7575	18.4943	18.6741	17.4751	11.7128	12.6978	12.3712	19.2034	12.736	18.9065	12.6367	15.8592	11.4794	18.5554
+	5.31369	1.64108	K[54.0106]KYDLESASAILPSSAIEDPDLGSLGKM[15.9949]GK	sp|Q9BXF6|RFIP5_HUMAN	1K(54.0106),28M(15.9949)	Q9BXF6	RFIP5_HUMAN	RAB11FIP5	Rab11 family-interacting protein 5	GO:0002790;GO:0006810;GO:0006887;GO:0008104;GO:0009268;GO:0009306;GO:0009628;GO:0009914;GO:0009987;GO:0010447;GO:0010646;GO:0010648;GO:0010817;GO:0015031;GO:0015833;GO:0016192;GO:0023051;GO:0023057;GO:0023061;GO:0030072;GO:0030073;GO:0032879;GO:0032880;GO:0032940;GO:0033036;GO:0035592;GO:0035773;GO:0042886;GO:0045055;GO:0045184;GO:0046879;GO:0046883;GO:0046888;GO:0046903;GO:0048519;GO:0048523;GO:…	GO:0005488;GO:0005515;GO:0008092;GO:0015631;GO:0019899;GO:0031267;GO:0043015;GO:0051020	GO:0000139;GO:0005739;GO:0005741;GO:0005768;GO:0005769;GO:0005794;GO:0010008;GO:0012506;GO:0016020;GO:0019867;GO:0030139;GO:0030141;GO:0030658;GO:0030659;GO:0031090;GO:0031410;GO:0031901;GO:0031966;GO:0031968;GO:0031982;GO:0034451;GO:0043226;GO:0043227;GO:0043229;GO:0043231;GO:0045335;GO:0055037;GO:0055038;GO:0097708;GO:0098588;GO:0099503;GO:0110165	201	230	12.462	12.273	13.4887	13.5486	20.6639	12.7337	18.8782	12.6835	13.8089	12.2232	19.9372	13.6539	12.5055	12.4822	20.347	12.3258	13.2055	11.2568	18.415	20.4961	11.8219	13.5425	13.376	12.1838	18.1615	12.7816	19.539	13.5356	18.7044	12.587	13.5875	12.2993	19.9703	13.5087	13.4148
+	8.89562	1.63589	LPSVEEAEVPK[54.0106]	sp|O00515|LAD1_HUMAN	11K(54.0106)	O00515	LAD1_HUMAN	LAD1	Ladinin-1		GO:0005198;GO:0005488;GO:0005515;GO:0045296;GO:0050839	GO:0005604;GO:0005856;GO:0015629;GO:0030312;GO:0031012;GO:0031982;GO:0043226;GO:0043227;GO:0043228;GO:0043229;GO:0043230;GO:0043232;GO:0062023;GO:0065010;GO:0070062;GO:0110165;GO:1903561	62	72	12.9897	13.5931	16.3642	14.4361	13.85	13.3926	13.105	12.8531	14.9908	12.6475	12.8333	12.209	12.8918	12.8536	13.0897	12.4225	13.4486	11.2743	12.7453	15.1646	12.025	12.9245	15.5832	13.3008	16.9257	13.1298	13.1841	12.2045	16.6794	12.5143	13.7143	12.0927	12.931	12.4815	11.1901
+	5.81024	1.6358	FHTIYRQLHSLC[125.0477]QR[54.0106]R[54.0106]	sp|P46199|IF2M_HUMAN	12C(125.0477),14R(54.0106),15R(54.0106)	P46199	IF2M_HUMAN	MTIF2	Translation initiation factor IF-2, mitochondrial	GO:0006413;GO:0006417;GO:0006446;GO:0006996;GO:0008152;GO:0009889;GO:0009987;GO:0010468;GO:0010556;GO:0010608;GO:0016043;GO:0019222;GO:0022411;GO:0031323;GO:0031326;GO:0032790;GO:0034248;GO:0044237;GO:0050789;GO:0050794;GO:0051171;GO:0051246;GO:0060255;GO:0065007;GO:0070124;GO:0071840;GO:0080090;GO:1903008	GO:0000166;GO:0003676;GO:0003723;GO:0003743;GO:0003824;GO:0003924;GO:0005488;GO:0005525;GO:0008135;GO:0016462;GO:0016787;GO:0016817;GO:0016818;GO:0017076;GO:0017111;GO:0019001;GO:0032553;GO:0032555;GO:0032561;GO:0035639;GO:0036094;GO:0043021;GO:0043022;GO:0043024;GO:0043167;GO:0043168;GO:0044877;GO:0045182;GO:0090079;GO:0097159;GO:0097367;GO:1901265;GO:1901363	GO:0005654;GO:0005737;GO:0005739;GO:0043226;GO:0043227;GO:0043229;GO:0043231;GO:0110165	14	28	12.6352	12.6911	12.5335	13.1082	13.3279	12.7718	13.2332	13.3365	12.6263	13.2156	13.3317	13.681	12.689	12.6318	20.2591	13.3222	12.7857	12.1568	12.5241	13.3964	12.0981	13.8042	13.7978	12.9216	13.1975	12.1015	13.1801	12.251	12.3398	13.3921	12.6471	11.2575	19.0415	12.4079	12.4891
+	4.82233	1.6334	EHLPK[54.0106]VEMPSLKM[15.9949]PK	sp|Q8IVF2|AHNK2_HUMAN	13M(15.9949),5K(54.0106)	Q8IVF2	AHNK2_HUMAN	AHNAK2	Protein AHNAK2	GO:0009889;GO:0010468;GO:0010556;GO:0019219;GO:0019222;GO:0031323;GO:0031326;GO:0043484;GO:0050789;GO:0050794;GO:0051171;GO:0051252;GO:0060255;GO:0065007;GO:0080090		GO:0005634;GO:0005737;GO:0005829;GO:0005886;GO:0016020;GO:0030315;GO:0042383;GO:0043034;GO:0043226;GO:0043227;GO:0043229;GO:0043231;GO:0110165	3719	3733	13.223	13.9225	12.6045	13.4334	13.72	12.7885	14.2558	13.2409	13.6354	12.7275	14.1863	14.1425	11.9913	13.4594	13.1332	13.1701	12.3686	12.0801	12.8713	15.1974	12.5104	13.8914	18.7934	11.3273	11.9516	12.0296	13.2543	13.0451	12.0632	12.6042	13.7749	12.0693	14.4926	12.7181	18.9384
+	4.67158	1.63278	SAGSALYASRLYLSR[54.0106]	sp|Q96IJ6|GMPPA_HUMAN	15R(54.0106)	Q96IJ6	GMPPA_HUMAN	GMPPA	Mannose-1-phosphate guanyltransferase alpha	GO:0008152;GO:0009058	GO:0003824;GO:0016740	GO:0005737;GO:0031982;GO:0043226;GO:0043227;GO:0043230;GO:0065010;GO:0070062;GO:0110165;GO:1903561	250	264	13.0983	13.7682	17.6344	12.3212	12.4511	12.9361	15.211	11.504	14.1268	13.5534	18.9167	13.759	13.0008	12.6357	18.8669	11.777	13.0095	12.2848	19.559	13.7883	12.4739	13.2875	12.998	18.1289	17.7853	12.7024	18.9031	11.6579	18.6142	18.5958	17.6641	11.7185	20.6862	13.2296	13.4187
+	4.17751	1.62905	VQELK[54.0106]DKLTELLEENPDTPEAPR[54.0106]WK[54.0106]	sp|Q03001|DYST_HUMAN	23R(54.0106),25K(54.0106),5K(54.0106)	Q03001	DYST_HUMAN	DST	Dystonin	GO:0000226;GO:0006810;GO:0006950;GO:0006996;GO:0007010;GO:0007017;GO:0007018;GO:0007044;GO:0007155;GO:0007163;GO:0007165;GO:0007166;GO:0007229;GO:0008088;GO:0008090;GO:0009611;GO:0009987;GO:0010970;GO:0016043;GO:0022607;GO:0030011;GO:0030705;GO:0031581;GO:0034329;GO:0034330;GO:0042060;GO:0045103;GO:0045104;GO:0046907;GO:0048870;GO:0050789;GO:0050794;GO:0050896;GO:0051179;GO:0051234;GO:0051641;GO:…	GO:0003779;GO:0005102;GO:0005178;GO:0005198;GO:0005488;GO:0005509;GO:0005515;GO:0008017;GO:0008092;GO:0015631;GO:0042802;GO:0042803;GO:0043167;GO:0043169;GO:0044877;GO:0046872;GO:0046983;GO:0050839;GO:0051010	GO:0005604;GO:0005634;GO:0005635;GO:0005654;GO:0005737;GO:0005789;GO:0005829;GO:0005856;GO:0005882;GO:0005925;GO:0005938;GO:0009925;GO:0015629;GO:0015630;GO:0016020;GO:0030018;GO:0030054;GO:0030055;GO:0030056;GO:0030312;GO:0030424;GO:0031012;GO:0031090;GO:0031252;GO:0031410;GO:0031673;GO:0031967;GO:0031975;GO:0031982;GO:0032838;GO:0035371;GO:0042995;GO:0043005;GO:0043226;GO:0043227;GO:0043228;GO:…	4572	4596	13.6004	13.5978	12.3302	12.2617	21.036	12.9031	20.5783	12.8741	13.076	13.1045	19.6312	12.9684	13.0211	12.407	19.3771	12.9881	12.3734	11.5698	20.1758	21.6276	13.6548	12.5892	13.4578	12.8656	18.8506	12.2429	19.1455	12.6851	18.9758	19.2319	13.35	12.0921	21.0872	12.7096	13.0528
+	4.34036	1.62452	QTSR[54.0106]SFASAAAFGDK[54.0106]	sp|Q8IY47|KBTB2_HUMAN	15K(54.0106),4R(54.0106)	Q8IY47	KBTB2_HUMAN	KBTBD2	Kelch repeat and BTB domain-containing protein 2	GO:0005975;GO:0005996;GO:0006006;GO:0006629;GO:0006807;GO:0008152;GO:0009058;GO:0009059;GO:0009719;GO:0009725;GO:0009987;GO:0010033;GO:0010243;GO:0010467;GO:0016567;GO:0019318;GO:0019538;GO:0032446;GO:0032868;GO:0036211;GO:0042221;GO:0043170;GO:0043412;GO:0043434;GO:0043687;GO:0044237;GO:0044238;GO:0044249;GO:0044281;GO:0050896;GO:0070647;GO:0071704;GO:1901564;GO:1901576;GO:1901652;GO:1901698;GO:…			456	470	13.5695	13.3654	17.8363	12.1497	13.9493	14.1415	19.7121	12.43	11.9647	12.8309	12.9262	13.1007	12.4914	12.7722	12.9859	12.3935	13.4713	12.528	19.2274	12.7016	11.0123	13.5223	13.5878	14.8583	17.5088	12.3003	18.5435	12.5522	18.3363	17.826	18.1229	12.2364	13.1577	13.1675	11.816
+	6.95921	1.62199	QLSLTHPEILVPQISTEGGISTER[54.0106]	sp|Q9ULI3|HEG1_HUMAN	24R(54.0106)	Q9ULI3	HEG1_HUMAN	HEG1	Protein HEG homolog 1	GO:0000902;GO:0001570;GO:0001701;GO:0001817;GO:0001819;GO:0001886;GO:0001932;GO:0001933;GO:0001945;GO:0003008;GO:0003013;GO:0003017;GO:0003206;GO:0003209;GO:0003222;GO:0003279;GO:0003281;GO:0003382;GO:0006469;GO:0007275;GO:0007507;GO:0008104;GO:0009653;GO:0009790;GO:0009791;GO:0009792;GO:0009888;GO:0009889;GO:0009891;GO:0009892;GO:0009893;GO:0009966;GO:0009968;GO:0009987;GO:0010468;GO:0010556;GO:…	GO:0005488;GO:0005509;GO:0043167;GO:0043169;GO:0046872	GO:0005576;GO:0005911;GO:0009897;GO:0030054;GO:0070161;GO:0098552;GO:0110165	880	903	12.9432	13.0417	13.0051	13.2837	13.8933	12.1134	13.6722	12.9027	13.8627	13.2258	13.471	13.516	12.65	14.1729	12.6946	13.1407	12.9271	12.1227	12.8559	13.3081	12.2752	12.7115	13.4706	11.89	13.5195	14.3943	13.4614	13.5282	19.0655	12.9181	12.6654	12.9174	18.0163	11.9031	13.2677
+	5.65637	1.62184	ELK[54.0106]IQLAK	sp|P35580|MYH10_HUMAN	3K(54.0106)	P35580	MYH10_HUMAN	MYH10	Myosin-10	GO:0000281;GO:0000910;GO:0006996;GO:0007010;GO:0007155;GO:0008360;GO:0009987;GO:0016043;GO:0022402;GO:0022603;GO:0022604;GO:0030029;GO:0030036;GO:0030048;GO:0031032;GO:0032879;GO:0032880;GO:0048518;GO:0048522;GO:0050708;GO:0050714;GO:0050789;GO:0050793;GO:0050794;GO:0051046;GO:0051047;GO:0051049;GO:0051050;GO:0051222;GO:0051223;GO:0060341;GO:0061640;GO:0065007;GO:0065008;GO:0070201;GO:0071840;GO:…	GO:0000146;GO:0000166;GO:0003676;GO:0003723;GO:0003729;GO:0003774;GO:0003779;GO:0005488;GO:0005515;GO:0005516;GO:0005524;GO:0008092;GO:0017076;GO:0030554;GO:0032553;GO:0032555;GO:0032559;GO:0035613;GO:0035639;GO:0036094;GO:0043167;GO:0043168;GO:0043531;GO:0044877;GO:0048027;GO:0051015;GO:0097159;GO:0097367;GO:0140657;GO:1901265;GO:1901363	GO:0001725;GO:0005634;GO:0005737;GO:0005829;GO:0005844;GO:0005938;GO:0016020;GO:0016459;GO:0016460;GO:0030027;GO:0030496;GO:0031982;GO:0032154;GO:0032432;GO:0032982;GO:0032991;GO:0042641;GO:0042995;GO:0043226;GO:0043227;GO:0043229;GO:0043230;GO:0043231;GO:0065010;GO:0070062;GO:0097513;GO:0097517;GO:0098590;GO:0099080;GO:0099081;GO:0099512;GO:0110165;GO:0120025;GO:1903561;GO:1990904	1080	1087	14.8303	16.1352	14.0611	13.5197	15.3982	12.4585	16.7652	12.2524	13.6616	12.7126	14.8342	12.4642	11.7775	12.867	13.9897	12.8727	16.408	11.3175	15.225	18.6085	11.65	13.2473	16.9905	17.3833	15.7207	12.3416	15.9952	17.4111	17.5136	17.6515	16.6894	13.2631	17.7344	14.2834	16.8398
+	3.49688	1.61877	PGSFANVSIDMC[130.0791]AIIDR[54.0106]	sp|Q9UHC6|CNTP2_HUMAN	12C(130.0791),17R(54.0106)	Q9UHC6	CNTP2_HUMAN	CNTNAP2	Contactin-associated protein-like 2	GO:0003008;GO:0007155;GO:0007420;GO:0007610;GO:0007611;GO:0007612;GO:0007638;GO:0008037;GO:0008038;GO:0008104;GO:0008283;GO:0009653;GO:0009987;GO:0016043;GO:0019226;GO:0021756;GO:0021761;GO:0021794;GO:0021987;GO:0030030;GO:0030534;GO:0031175;GO:0031223;GO:0032101;GO:0032102;GO:0032501;GO:0032502;GO:0032989;GO:0033036;GO:0035176;GO:0042297;GO:0044087;GO:0044089;GO:0045161;GO:0045163;GO:0048513;GO:…	GO:0002020;GO:0005488;GO:0005515;GO:0019899;GO:0044325	GO:0005768;GO:0005769;GO:0005794;GO:0005911;GO:0008076;GO:0009986;GO:0016020;GO:0030054;GO:0030424;GO:0030425;GO:0030673;GO:0031253;GO:0031256;GO:0031410;GO:0031982;GO:0032589;GO:0032991;GO:0033010;GO:0033270;GO:0034702;GO:0034703;GO:0034705;GO:0042995;GO:0043005;GO:0043025;GO:0043204;GO:0043226;GO:0043227;GO:0043229;GO:0043231;GO:0044224;GO:0044297;GO:0070161;GO:0097060;GO:0097708;GO:0098590;GO:…	541	557	21.3753	13.0792	21.4189	12.0598	13.39	14.1113	15.0414	12.4326	13.9261	13.7838	13.4183	13.2215	13.1084	13.4001	13.7837	12.845	13.0949	12.296	13.8198	14.1831	12.2819	13.527	12.7773	12.4438	11.9119	11.9132	13.1077	12.217	11.9755	12.1401	12.9644	11.8466	12.9864	11.3945	12.6997
+	2.28834	1.61366	QNVSISTVPNAVTSLSK[54.0106]	sp|Q9HD43|PTPRH_HUMAN	17K(54.0106)	Q9HD43	PTPRH_HUMAN	PTPRH	Receptor-type tyrosine-protein phosphatase H	GO:0006470;GO:0006793;GO:0006796;GO:0006807;GO:0006915;GO:0008152;GO:0008219;GO:0009987;GO:0012501;GO:0016311;GO:0019538;GO:0036211;GO:0043170;GO:0043412;GO:0044237;GO:0044238;GO:0071704;GO:1901564	GO:0003824;GO:0004721;GO:0004725;GO:0004888;GO:0005001;GO:0005488;GO:0005515;GO:0016787;GO:0016788;GO:0016791;GO:0019198;GO:0038023;GO:0042578;GO:0045296;GO:0050839;GO:0060089;GO:0140096	GO:0005829;GO:0005886;GO:0016020;GO:0016324;GO:0016604;GO:0016607;GO:0031253;GO:0031528;GO:0098590;GO:0110165	467	483	17.6899	13.4178	16.9694	14.2041	18.9636	15.8517	17.375	12.7609	16.7194	13.3742	16.9443	12.9071	13.3101	12.2568	17.4713	11.6892	21.1478	12.1907	16.8529	13.4429	11.7057	12.6125	19.2265	22.3048	21.8915	12.4186	18.1149	13.4003	22.2123	22.5724	16.9217	20.352	12.0085	14.0055	20.2341
+	6.50396	1.60699	K[54.0106]PIGADSKEVHYK[54.0106]NR	sp|Q13642|FHL1_HUMAN	13K(54.0106),1K(54.0106)	Q13642	FHL1_HUMAN	FHL1	Four and a half LIM domains protein 1	GO:0001558;GO:0003254;GO:0007346;GO:0007517;GO:0009653;GO:0009887;GO:0009987;GO:0010389;GO:0010564;GO:0010948;GO:0010959;GO:0010972;GO:0022898;GO:0030154;GO:0030308;GO:0032409;GO:0032412;GO:0032502;GO:0032879;GO:0034762;GO:0034765;GO:0040008;GO:0042391;GO:0043266;GO:0043268;GO:0043269;GO:0043270;GO:0045786;GO:0045926;GO:0045930;GO:0048513;GO:0048518;GO:0048519;GO:0048523;GO:0048856;GO:0048869;GO:…	GO:0005488;GO:0005515;GO:0043167;GO:0043169;GO:0044325;GO:0046872	GO:0005634;GO:0005737;GO:0005829;GO:0005886;GO:0005925;GO:0016020;GO:0030054;GO:0030055;GO:0043226;GO:0043227;GO:0043229;GO:0043231;GO:0070161;GO:0110165	45	59	13.2677	17.0626	15.4038	13.4151	17.4398	12.777	14.5823	12.9035	18.2675	13.0837	17.6065	14.218	11.9087	13.0889	12.9045	12.5058	13.4587	11.1159	11.9206	17.4709	12.4082	13.5004	13.8318	12.8374	16.0325	12.3865	16.7729	13.1408	16.5693	11.6174	13.3596	12.9961	11.6531	12.6427	11.7598
+	4.16378	1.60177	R[54.0106]GGSIQQYIYKQEPVQKCPGR	sp|Q92954|PRG4_HUMAN	1R(54.0106)	Q92954	PRG4_HUMAN	PRG4	Proteoglycan 4	GO:0002376;GO:0006955;GO:0050896	GO:0005044;GO:0005488;GO:0030246;GO:0030247;GO:0038024	GO:0005615;GO:0030312;GO:0031012;GO:0062023;GO:0110165	1264	1284	21.1343	14.3977	13.5377	12.5779	22.5937	14.5618	20.8086	12.3277	13.5794	13.0514	21.792	12.4283	13.2807	12.3996	13.4045	12.5274	12.2119	12.9249	12.1558	14.3068	12.4919	13.6439	12.2346	12.4233	13.3574	11.8842	13.4058	12.6608	12.3462	12.5604	13.857	12.4067	12.9087	11.2904	12.1693
+	5.63316	1.59116	NIILPVYDKSLWDFLK[54.0106]LDVTTSIGR	sp|P04114|APOB_HUMAN	16K(54.0106)	P04114	APOB_HUMAN	APOB	Apolipoprotein B-100	GO:0001539;GO:0001701;GO:0003006;GO:0003341;GO:0006066;GO:0006629;GO:0006638;GO:0006639;GO:0006641;GO:0006642;GO:0006807;GO:0006810;GO:0006869;GO:0007017;GO:0007018;GO:0007275;GO:0007276;GO:0007283;GO:0007399;GO:0008104;GO:0008152;GO:0008202;GO:0008203;GO:0009056;GO:0009057;GO:0009058;GO:0009059;GO:0009566;GO:0009605;GO:0009607;GO:0009615;GO:0009653;GO:0009790;GO:0009791;GO:0009792;GO:0009889;GO:…	GO:0005102;GO:0005215;GO:0005319;GO:0005488;GO:0005515;GO:0005539;GO:0005543;GO:0008201;GO:0008289;GO:0015248;GO:0019899;GO:0035473;GO:0050750;GO:0070325;GO:0097367;GO:0120013;GO:0120015;GO:0120020;GO:1901681	GO:0005576;GO:0005615;GO:0005737;GO:0005768;GO:0005769;GO:0005775;GO:0005783;GO:0005788;GO:0005789;GO:0005790;GO:0005811;GO:0005829;GO:0005886;GO:0010008;GO:0012506;GO:0016020;GO:0030659;GO:0030662;GO:0030665;GO:0030666;GO:0030669;GO:0031090;GO:0031410;GO:0031904;GO:0031974;GO:0031982;GO:0032991;GO:0032994;GO:0034358;GO:0034359;GO:0034360;GO:0034361;GO:0034362;GO:0034363;GO:0034385;GO:0042627;GO:…	3674	3698	13.6009	12.4953	17.9093	12.8165	13.4335	12.9782	14.0548	11.6447	14.568	12.9901	19.1008	13.0016	13.0388	12.9286	18.6658	12.1524	12.8056	11.7613	17.6864	12.3017	11.3024	13.6007	13.7573	13.2944	17.4067	12.6769	18.5557	12.9173	18.9604	18.2744	17.5284	13.8466	17.6335	12.2719	12.6778
+	9.97605	1.58977	AQGFKAALVIDVTAK[54.0106]	sp|Q9BZR8|B2L14_HUMAN	15K(54.0106)	Q9BZR8	B2L14_HUMAN	BCL2L14	Apoptosis facilitator Bcl-2-like protein 14	GO:0006915;GO:0008219;GO:0009966;GO:0009967;GO:0009987;GO:0010646;GO:0010647;GO:0012501;GO:0023051;GO:0023056;GO:0042981;GO:0043065;GO:0043067;GO:0043068;GO:0048518;GO:0048522;GO:0048583;GO:0048584;GO:0050789;GO:0050794;GO:0065007;GO:2001233;GO:2001235;GO:2001236;GO:2001238	GO:0005488;GO:0005515;GO:0019899;GO:0019900;GO:0019901	GO:0005829;GO:0012505;GO:0016020;GO:0043226;GO:0043229;GO:0110165	267	281	14.2068	14.6751	14.1531	13.1038	16.4786	15.7816	16.1709	15.7527	17.3694	13.0877	16.2829	13.6771	13.6238	12.2876	15.8983	12.5233	15.3978	11.1495	15.3858	17.8571	12.5403	13.7103	15.9234	15.2725	14.872	12.5265	15.7068	12.8293	15.4042	14.2502	14.7018	12.1641	13.3069	11.943	15.278
+	4.23822	1.58937	C[130.0791]QDSHER[54.0106]K[54.0106]	sp|O15553|MEFV_HUMAN	1C(130.0791),7R(54.0106),8K(54.0106)	O15553	MEFV_HUMAN	MEFV	Pyrin	GO:0001817;GO:0001818;GO:0001819;GO:0002218;GO:0002221;GO:0002253;GO:0002376;GO:0002682;GO:0002684;GO:0002757;GO:0002758;GO:0002764;GO:0002831;GO:0002833;GO:0006807;GO:0006950;GO:0006952;GO:0006954;GO:0006955;GO:0007165;GO:0008152;GO:0008219;GO:0009605;GO:0009607;GO:0009889;GO:0009890;GO:0009891;GO:0009892;GO:0009893;GO:0009894;GO:0009896;GO:0009987;GO:0010033;GO:0010468;GO:0010506;GO:0010508;GO:…	GO:0003779;GO:0003824;GO:0004842;GO:0005488;GO:0005515;GO:0008092;GO:0008270;GO:0016740;GO:0016746;GO:0016755;GO:0019787;GO:0042802;GO:0043167;GO:0043169;GO:0046872;GO:0046914;GO:0061630;GO:0061659;GO:0140096	GO:0001726;GO:0005634;GO:0005654;GO:0005737;GO:0005773;GO:0005776;GO:0005829;GO:0005874;GO:0005875;GO:0030027;GO:0031410;GO:0031982;GO:0032991;GO:0042995;GO:0043226;GO:0043227;GO:0043229;GO:0043231;GO:0061702;GO:0097708;GO:0099080;GO:0099081;GO:0099512;GO:0099513;GO:0110165;GO:0120025	355	362	18.8672	14.1701	16.2171	13.2	16.8407	13.7263	15.002	12.6348	13.7478	12.7091	14.6781	12.3349	13.3381	11.6806	13.7221	12.3748	13.3941	10.983	13.126	12.8525	11.3278	13.204	20.4342	12.3399	13.0486	11.5113	12.5035	13.006	13.6345	13.0775	12.9734	13.0865	13.6405	12.1213	13.429
+	2.54713	1.58857	NIIEDLNSVIR[54.0106]TQGQK	sp|Q8NDM7|CFA43_HUMAN	11R(54.0106)	Q8NDM7	CFA43_HUMAN	CFAP43	Cilia- and flagella-associated protein 43	GO:0000226;GO:0001578;GO:0003006;GO:0003008;GO:0003016;GO:0003341;GO:0003351;GO:0003352;GO:0003356;GO:0006810;GO:0006858;GO:0006996;GO:0007010;GO:0007017;GO:0007018;GO:0007288;GO:0007420;GO:0009987;GO:0016043;GO:0022412;GO:0022414;GO:0022607;GO:0030030;GO:0030031;GO:0032501;GO:0032502;GO:0032886;GO:0035082;GO:0044782;GO:0048513;GO:0048856;GO:0050789;GO:0050794;GO:0050877;GO:0051179;GO:0051234;GO:…		GO:0005576;GO:0005929;GO:0005930;GO:0031514;GO:0042995;GO:0043226;GO:0043227;GO:0097729;GO:0110165;GO:0120025	1467	1482	17.6253	20.7649	20.329	15.0467	21.3126	14.0995	15.0079	12.6181	21.2467	15.377	17.6403	12.6919	12.0677	13.3168	14.9508	16.5971	19.6022	19.8752	15.6379	22.5405	11.9642	16.3987	19.9654	11.7971	14.4168	15.0325	14.0816	12.3004	20.0408	15.1506	13.0402	20.2538	21.5856	12.5765	20.0806
+	2.43181	1.58199	QLM[15.9949]VHAFIK[54.0106]R[54.0106]	sp|Q02750|MP2K1_HUMAN	10R(54.0106),3M(15.9949),9K(54.0106)	Q02750	MP2K1_HUMAN	MAP2K1	Dual specificity mitogen-activated protein kinase kinase 1	GO:0000165;GO:0001568;GO:0001932;GO:0001934;GO:0006355;GO:0006468;GO:0006793;GO:0006796;GO:0006807;GO:0006935;GO:0007165;GO:0007166;GO:0007167;GO:0007169;GO:0007507;GO:0008152;GO:0008283;GO:0008285;GO:0009889;GO:0009891;GO:0009893;GO:0009913;GO:0009966;GO:0009967;GO:0009987;GO:0010001;GO:0010468;GO:0010556;GO:0010557;GO:0010562;GO:0010604;GO:0010628;GO:0010646;GO:0010647;GO:0010720;GO:0010975;GO:…	GO:0000166;GO:0003824;GO:0004672;GO:0004674;GO:0004708;GO:0004712;GO:0004713;GO:0005078;GO:0005488;GO:0005515;GO:0005524;GO:0008047;GO:0016301;GO:0016740;GO:0016772;GO:0016773;GO:0017076;GO:0019207;GO:0019209;GO:0019887;GO:0030234;GO:0030295;GO:0030554;GO:0030674;GO:0032553;GO:0032555;GO:0032559;GO:0035591;GO:0035639;GO:0036094;GO:0043167;GO:0043168;GO:0043539;GO:0060090;GO:0097110;GO:0097159;GO:…	GO:0005634;GO:0005739;GO:0005768;GO:0005769;GO:0005770;GO:0005783;GO:0005794;GO:0005815;GO:0005829;GO:0005886;GO:0005925;GO:0016020;GO:0030054;GO:0030055;GO:0031410;GO:0031982;GO:0043226;GO:0043227;GO:0043229;GO:0043231;GO:0070161;GO:0097708;GO:0110165	354	363	20.0174	20.4905	20.0786	13.4165	21.1458	20.5442	20.5633	12.3952	21.7902	13.3258	19.5883	18.2483	12.6687	12.6807	20.3623	12.8936	13.3272	12.4168	20.3842	21.1138	11.7654	20.2697	13.1578	12.0325	17.9634	12.2421	19.6637	12.919	18.2281	16.9611	13.0763	12.7065	20.0233	12.2136	13.0359
+	4.57655	1.58163	KEAVQTAAK[54.0106]ELLK[54.0106]FVNR[54.0106]	sp|Q9ULA0|DNPEP_HUMAN	13K(54.0106),17R(54.0106),9K(54.0106)	Q9ULA0	DNPEP_HUMAN	DNPEP	Aspartyl aminopeptidase	GO:0006508;GO:0006518;GO:0006807;GO:0008152;GO:0019538;GO:0043170;GO:0043603;GO:0044238;GO:0071704;GO:1901564	GO:0003824;GO:0004177;GO:0005488;GO:0005515;GO:0008233;GO:0008237;GO:0008238;GO:0008270;GO:0016787;GO:0042802;GO:0043167;GO:0043169;GO:0046872;GO:0046914;GO:0140096	GO:0005634;GO:0005737;GO:0005829;GO:0043226;GO:0043227;GO:0043229;GO:0043231;GO:0072562;GO:0110165	21	37	12.3284	13.2741	14.1782	12.9313	12.7611	13.9579	14.9634	12.629	13.2643	13.1089	12.8726	13.665	12.8955	13.1424	13.133	12.6769	12.4808	11.4785	12.121	15.0423	12.8015	13.156	13.1471	12.6679	12.3384	12.1721	13.8961	11.9038	13.4788	13.5258	13.0871	12.6879	13.1464	13.4981	13.824
+	5.70378	1.58018	KQDGALYLMAER[54.0106]	sp|P32780|TF2H1_HUMAN	12R(54.0106)	P32780	TF2H1_HUMAN	GTF2H1	General transcription factor IIH subunit 1	GO:0000079;GO:0001932;GO:0006139;GO:0006259;GO:0006281;GO:0006289;GO:0006351;GO:0006355;GO:0006360;GO:0006366;GO:0006725;GO:0006807;GO:0006950;GO:0006974;GO:0007165;GO:0008152;GO:0009058;GO:0009059;GO:0009755;GO:0009889;GO:0009891;GO:0009893;GO:0009987;GO:0010468;GO:0010556;GO:0010557;GO:0010604;GO:0016070;GO:0018130;GO:0019219;GO:0019220;GO:0019222;GO:0019438;GO:0031323;GO:0031325;GO:0031326;GO:…	GO:0003682;GO:0005488;GO:0005515;GO:0008134;GO:0016922;GO:0044877;GO:0046966;GO:0061629;GO:0140297	GO:0000439;GO:0005654;GO:0005667;GO:0005675;GO:0032806;GO:0032991;GO:0061695;GO:0090575;GO:0110165;GO:0140513;GO:1902494;GO:1902554;GO:1902911;GO:1990234	19	30	13.0305	12.9829	13.0165	13.8734	13.6401	12.3676	14.2057	12.6071	13.5195	13.6163	13.2901	12.9876	13.3609	12.8432	13.419	12.5054	12.3758	11.665	11.4309	13.8609	11.5641	13.349	13.1435	12.205	16.3465	12.3447	13.2088	13.6648	16.9742	13.5269	16.8569	12.2099	13.2656	11.4241	17.4116
+	9.31446	1.57902	K[54.0106]NQTLQKEIQGHQPR	sp|Q01082|SPTB2_HUMAN	1K(54.0106)	Q01082	SPTB2_HUMAN	SPTBN1	Spectrin beta chain, non-erythrocytic 1	GO:0000281;GO:0000910;GO:0001817;GO:0001819;GO:0006810;GO:0006892;GO:0006893;GO:0006996;GO:0007009;GO:0007010;GO:0007417;GO:0008064;GO:0008104;GO:0009889;GO:0009891;GO:0009893;GO:0009966;GO:0009987;GO:0010468;GO:0010556;GO:0010557;GO:0010604;GO:0010628;GO:0010639;GO:0010646;GO:0015031;GO:0016043;GO:0016192;GO:0019222;GO:0021556;GO:0022402;GO:0022607;GO:0023051;GO:0030029;GO:0030036;GO:0030832;GO:…	GO:0003676;GO:0003723;GO:0003779;GO:0005198;GO:0005200;GO:0005488;GO:0005515;GO:0005516;GO:0005543;GO:0008092;GO:0008289;GO:0019899;GO:0030506;GO:0044877;GO:0045296;GO:0050839;GO:0051015;GO:0051020;GO:0097159	GO:0005730;GO:0005737;GO:0005829;GO:0005856;GO:0005886;GO:0008091;GO:0014069;GO:0014731;GO:0016020;GO:0030054;GO:0030673;GO:0030863;GO:0030864;GO:0031253;GO:0031256;GO:0031430;GO:0031982;GO:0032437;GO:0032589;GO:0032991;GO:0042995;GO:0043226;GO:0043227;GO:0043228;GO:0043229;GO:0043230;GO:0043232;GO:0045202;GO:0065010;GO:0070062;GO:0098590;GO:0098978;GO:0099572;GO:0110165;GO:1903561	1526	1540	13.2699	13.2848	13.7672	12.2547	12.4303	13.4116	13.3386	12.2757	15.2807	12.7193	13.8769	12.5955	13.4089	12.2158	13.9583	12.9495	16.5352	12.3583	13.0041	13.9561	13.2418	13.7509	17.0086	13.1935	12.3876	12.3699	13.1884	16.5368	16.2647	13.9451	16.5837	12.383	16.2754	13.6018	16.4566
+	5.74742	1.57824	VGPNAEPRFR[54.0106]DEFVIPHLHK[54.0106]	sp|Q9P260|RELCH_HUMAN	10R(54.0106),20K(54.0106)	Q9P260	RELCH_HUMAN	RELCH	RAB11-binding protein RELCH	GO:0006810;GO:0006869;GO:0009987;GO:0015850;GO:0015918;GO:0030301;GO:0032365;GO:0032366;GO:0032367;GO:0046907;GO:0051179;GO:0051234;GO:0051641;GO:0051649;GO:0071702		GO:0005768;GO:0005802;GO:0031410;GO:0031982;GO:0031984;GO:0043226;GO:0043227;GO:0043229;GO:0043231;GO:0055037;GO:0097708;GO:0098791;GO:0110165	1073	1092	12.8732	13.2063	12.2869	13.7509	13.3523	12.8847	13.3716	12.9848	14.4641	13.3524	12.117	12.7765	12.1308	12.9069	18.7481	12.0711	13.1415	11.9628	17.8233	13.4155	12.5627	13.4004	14.228	12.441	12.441	11.7402	12.9677	13.0778	16.677	12.594	12.6941	13.5113	13.4515	12.0938	13.2322
+	2.74531	1.57425	K[54.0106]NINC[130.0791]SIEESFQR	sp|P35914|HMGCL_HUMAN	1K(54.0106),5C(130.0791)	P35914	HMGCL_HUMAN	HMGCL	Hydroxymethylglutaryl-CoA lyase, mitochondrial	GO:0006082;GO:0006091;GO:0006520;GO:0006551;GO:0006552;GO:0006629;GO:0006807;GO:0006996;GO:0007005;GO:0008152;GO:0008610;GO:0009056;GO:0009058;GO:0009063;GO:0009081;GO:0009083;GO:0009987;GO:0016043;GO:0016054;GO:0019752;GO:0043436;GO:0044237;GO:0044238;GO:0044248;GO:0044249;GO:0044281;GO:0044282;GO:0044283;GO:0046395;GO:0046950;GO:0046951;GO:0071704;GO:0071840;GO:1901564;GO:1901565;GO:1901568;GO:…	GO:0000287;GO:0003824;GO:0004419;GO:0005198;GO:0005488;GO:0016829;GO:0016830;GO:0016833;GO:0030145;GO:0043167;GO:0043169;GO:0046872;GO:0046914	GO:0005739;GO:0005759;GO:0005777;GO:0005782;GO:0005829;GO:0031907;GO:0031974;GO:0032991;GO:0042579;GO:0043226;GO:0043227;GO:0043229;GO:0043231;GO:0043233;GO:0070013;GO:0110165	137	149	13.3431	13.6425	18.8362	13.4417	13.0733	13.6428	13.9014	13.9018	15.3099	13.4163	13.4987	12.9571	13.476	12.5811	12.9025	12.1157	16.566	17.0166	11.9244	13.6331	12.0425	13.7252	19.3019	12.9439	12.0108	12.4826	12.3159	13.9081	12.4569	12.9779	13.0938	16.986	15.4886	12.1296	20.0984
+	3.43761	1.57327	FKDELDIM[15.9949]K[54.0106]	sp|Q86SZ2|TPC6B_HUMAN	8M(15.9949),9K(54.0106)	Q86SZ2	TPC6B_HUMAN	TRAPPC6B	Trafficking protein particle complex subunit 6B	GO:0006810;GO:0006888;GO:0006901;GO:0006996;GO:0007399;GO:0009987;GO:0016043;GO:0016050;GO:0016192;GO:0032502;GO:0046907;GO:0048193;GO:0048731;GO:0048856;GO:0051179;GO:0051234;GO:0051641;GO:0051649;GO:0071840;GO:0099022		GO:0005737;GO:0005783;GO:0005801;GO:0005802;GO:0005829;GO:0030008;GO:0031984;GO:0032991;GO:0043226;GO:0043227;GO:0043229;GO:0043231;GO:0098791;GO:0099023;GO:0110165;GO:0140535;GO:1990071	58	66	12.9199	13.5171	11.8169	14.1349	13.7528	13.1261	11.5811	12.2286	13.2182	13.5579	13.1241	13.8059	13.0501	13.2547	13.6526	12.8811	18.4718	11.6991	13.6883	13.8772	12.2973	13.2732	19.6703	18.4658	16.407	11.6041	13.1614	12.6765	19.7044	19.6624	19.2726	16.1422	20.0431	12.0931	19.2758
+	6.36427	1.57073	ENLVLHLDR[54.0106]	sp|O43166|SI1L1_HUMAN	9R(54.0106)	O43166	SI1L1_HUMAN	SIPA1L1	Signal-induced proliferation-associated 1-like protein 1	GO:0006996;GO:0007010;GO:0007165;GO:0007166;GO:0007167;GO:0007169;GO:0009966;GO:0009987;GO:0010646;GO:0010975;GO:0016043;GO:0022603;GO:0023051;GO:0030029;GO:0030036;GO:0031344;GO:0043085;GO:0043087;GO:0043547;GO:0044093;GO:0048013;GO:0048167;GO:0048583;GO:0050770;GO:0050789;GO:0050790;GO:0050793;GO:0050794;GO:0050804;GO:0050807;GO:0051056;GO:0051128;GO:0051336;GO:0051345;GO:0061001;GO:0065007;GO:…	GO:0005096;GO:0005102;GO:0005488;GO:0005515;GO:0008047;GO:0030234;GO:0030695;GO:0046875;GO:0060589;GO:0098772;GO:0140677	GO:0005737;GO:0005856;GO:0005886;GO:0014069;GO:0015629;GO:0016020;GO:0042995;GO:0043005;GO:0043197;GO:0043226;GO:0043228;GO:0043229;GO:0043232;GO:0044309;GO:0098794;GO:0099572;GO:0110165;GO:0120025	468	476	15.735	16.3319	15.5574	16.0725	17.407	16.8497	16.7304	15.9652	17.5524	16.1851	16.4924	11.9317	15.5002	12.0487	16.8676	13.1278	12.1273	12.4	16.3723	17.5578	11.4342	16.8776	15.1898	16.451	15.1206	12.2332	17.0341	12.9576	16.4507	16.718	15.6124	15.913	16.9526	16.4518	12.4833
+	3.19483	1.5651	ISPVLSNAM[15.9949]DVGSTRSESEK[54.0106]	sp|Q6ZP82|CC141_HUMAN	20K(54.0106),9M(15.9949)	Q6ZP82	CC141_HUMAN	CCDC141	Coiled-coil domain-containing protein 141	GO:0009987;GO:0016477;GO:0021795;GO:0021799;GO:0021885;GO:0022029;GO:0048870;GO:0051179;GO:0051642;GO:0061842		GO:0005737;GO:0005813;GO:0005815;GO:0110165	477	496	12.7768	12.5854	14.1843	13.8187	13.2894	13.1322	13.2115	12.0512	13.3045	13.4038	13.2083	12.5854	11.9122	12.4346	21.4843	12.5832	13.1349	11.4676	21.6425	14.7588	12.0744	14.1637	20.8754	12.1959	20.7249	11.803	12.4931	12.9213	21.1607	21.0601	20.8382	13.188	22.0768	12.4364	21.0312
+	3.30678	1.56503	K[54.0106]ELDILLQEK	sp|Q9H2U1|DHX36_HUMAN	1K(54.0106)	Q9H2U1	DHX36_HUMAN	DHX36	ATP-dependent DNA/RNA helicase DHX36	GO:0001503;GO:0001817;GO:0001819;GO:0002376;GO:0002682;GO:0002684;GO:0002697;GO:0002699;GO:0002700;GO:0002702;GO:0002703;GO:0002705;GO:0002718;GO:0002720;GO:0002730;GO:0002732;GO:0002733;GO:0002735;GO:0002886;GO:0002888;GO:0003006;GO:0006139;GO:0006355;GO:0006357;GO:0006359;GO:0006417;GO:0006725;GO:0006807;GO:0006950;GO:0006952;GO:0006955;GO:0006996;GO:0007276;GO:0007283;GO:0008152;GO:0009266;GO:…	GO:0000166;GO:0000287;GO:0000976;GO:0000977;GO:0000978;GO:0000987;GO:0001067;GO:0002151;GO:0003676;GO:0003677;GO:0003678;GO:0003690;GO:0003697;GO:0003723;GO:0003724;GO:0003725;GO:0003729;GO:0003730;GO:0003824;GO:0004386;GO:0005488;GO:0005515;GO:0005524;GO:0008094;GO:0008186;GO:0016462;GO:0016787;GO:0016817;GO:0016818;GO:0016887;GO:0017076;GO:0017111;GO:0019899;GO:0030554;GO:0032553;GO:0032555;GO:…	GO:0000781;GO:0005634;GO:0005654;GO:0005737;GO:0005739;GO:0005829;GO:0010494;GO:0016604;GO:0016607;GO:0030424;GO:0030425;GO:0031982;GO:0035770;GO:0036464;GO:0042995;GO:0043005;GO:0043204;GO:0043226;GO:0043227;GO:0043228;GO:0043229;GO:0043230;GO:0043231;GO:0043232;GO:0065010;GO:0070062;GO:0098687;GO:0099080;GO:0110165;GO:0120025;GO:1903561	951	960	18.1489	18.6409	18.3062	18.0808	19.2471	19.4198	18.3647	17.5211	20.062	17.5555	18.608	17.7992	17.5793	15.5881	18.6952	12.6905	16.5546	12.2258	18.0922	18.5333	13.9234	18.8971	17.4607	12.3261	12.7668	11.723	18.3092	12.5429	12.5861	13.425	13.3073	15.1034	12.7204	13.5689	17.7242
+	6.6656	1.56211	NFFITTENLLASWNFWTPLLESLAHK[54.0106]	sp|O95479|G6PE_HUMAN	26K(54.0106)	O95479	G6PE_HUMAN	H6PD	GDH/6PGL endoplasmic bifunctional protein	GO:0005975;GO:0005996;GO:0006006;GO:0006091;GO:0006139;GO:0006163;GO:0006725;GO:0006739;GO:0006740;GO:0006753;GO:0006793;GO:0006796;GO:0006807;GO:0008152;GO:0009051;GO:0009117;GO:0009605;GO:0009889;GO:0009987;GO:0009991;GO:0010033;GO:0010565;GO:0010566;GO:0010817;GO:0019216;GO:0019218;GO:0019222;GO:0019318;GO:0019362;GO:0019637;GO:0031323;GO:0031326;GO:0031667;GO:0031943;GO:0031946;GO:0032350;GO:…	GO:0000166;GO:0003824;GO:0004344;GO:0004345;GO:0005488;GO:0016491;GO:0016614;GO:0016616;GO:0016787;GO:0016788;GO:0017057;GO:0017076;GO:0030246;GO:0030554;GO:0036094;GO:0047934;GO:0047935;GO:0047936;GO:0050661;GO:0052689;GO:0097159;GO:1901265;GO:1901363	GO:0005783;GO:0005788;GO:0031974;GO:0043226;GO:0043227;GO:0043229;GO:0043231;GO:0043233;GO:0070013;GO:0110165	471	496	16.2161	17.1443	16.2565	15.7381	17.0739	15.9951	13.7399	15.6621	17.5891	14.2727	16.7345	15.6628	12.5081	11.8305	15.9515	12.6159	15.0998	11.4772	16.8276	14.7577	12.7304	16.3491	16.4374	12.6157	15.5882	12.1508	16.6982	12.5568	15.9971	13.0285	15.1823	12.6413	13.1767	12.8385	16.7825
+	4.22584	1.56154	QVETIR[54.0106]NLVDSYM[15.9949]AIVNK[54.0106]	sp|Q05193|DYN1_HUMAN	13M(15.9949),18K(54.0106),6R(54.0106)	Q05193	DYN1_HUMAN	DNM1	Dynamin-1	GO:0006810;GO:0006897;GO:0006898;GO:0006900;GO:0006996;GO:0007032;GO:0009987;GO:0010646;GO:0016043;GO:0016050;GO:0016185;GO:0016192;GO:0023051;GO:0031623;GO:0048488;GO:0050789;GO:0050794;GO:0050804;GO:0051179;GO:0051234;GO:0051649;GO:0061024;GO:0065007;GO:0070142;GO:0071840;GO:0098657;GO:0099003;GO:0099177;GO:0140238	GO:0000166;GO:0003676;GO:0003723;GO:0003824;GO:0003924;GO:0005488;GO:0005515;GO:0005525;GO:0008017;GO:0008092;GO:0015631;GO:0016462;GO:0016787;GO:0016817;GO:0016818;GO:0017076;GO:0017111;GO:0019001;GO:0019899;GO:0019900;GO:0019901;GO:0032553;GO:0032555;GO:0032561;GO:0035639;GO:0036094;GO:0042802;GO:0043167;GO:0043168;GO:0097159;GO:0097367;GO:1901265;GO:1901363	GO:0001917;GO:0005737;GO:0005874;GO:0005886;GO:0016020;GO:0030054;GO:0030117;GO:0031982;GO:0032991;GO:0043226;GO:0043227;GO:0043230;GO:0045202;GO:0065010;GO:0070062;GO:0097060;GO:0097470;GO:0098590;GO:0098684;GO:0098796;GO:0098835;GO:0098978;GO:0099080;GO:0099081;GO:0099512;GO:0099513;GO:0110165;GO:1903561	658	675	12.3755	17.094	12.7538	13.4685	15.5472	13.1583	16.9689	12.5319	15.9989	13.109	15.5851	12.9289	12.1103	12.2886	13.1549	13.0762	13.2716	11.7243	17.7452	15.0867	12.2866	13.9217	19.2573	12.3852	17.7279	12.3742	14.9363	12.8185	19.6088	19.2922	19.7921	12.4925	20.7507	12.103	21.1653
+	7.90284	1.55476	LSDLVNTAILIALNK[54.0106]	sp|Q8WUM0|NU133_HUMAN	15K(54.0106)	Q8WUM0	NU133_HUMAN	NUP133	Nuclear pore complex protein Nup133	GO:0000972;GO:0006405;GO:0006406;GO:0006606;GO:0006810;GO:0006886;GO:0006913;GO:0006996;GO:0006997;GO:0006999;GO:0007498;GO:0008104;GO:0009888;GO:0009987;GO:0015031;GO:0015931;GO:0016043;GO:0016973;GO:0021915;GO:0022008;GO:0030154;GO:0032502;GO:0033036;GO:0033365;GO:0034504;GO:0035295;GO:0043933;GO:0045184;GO:0046907;GO:0048339;GO:0048856;GO:0048869;GO:0050657;GO:0050658;GO:0051028;GO:0051168;GO:…	GO:0005198;GO:0017056	GO:0000776;GO:0005635;GO:0005643;GO:0005829;GO:0016020;GO:0031080;GO:0031090;GO:0031965;GO:0031967;GO:0031975;GO:0032991;GO:0043226;GO:0043228;GO:0043229;GO:0043232;GO:0099080;GO:0110165;GO:0140513	660	674	13.3324	13.1262	12.0322	14.1678	14.1696	12.4829	14.2669	11.9816	13.635	13.0934	12.9936	12.4938	13.0487	12.6747	13.2173	11.5033	12.9085	11.2413	12.5723	13.6535	12.0819	14.2792	13.3131	12.5097	11.9487	11.6743	14.284	12.463	16.6684	13.0706	13.4794	12.4819	15.5496	12.2853	13.2698
+	1.90416	1.55425	AAPSPQEALVR[54.0106]	sp|Q96CF2|CHM4C_HUMAN	11R(54.0106)	Q96CF2	CHM4C_HUMAN	CHMP4C	Charged multivesicular body protein 4c	GO:0000075;GO:0001778;GO:0006508;GO:0006511;GO:0006807;GO:0006810;GO:0006900;GO:0006906;GO:0006914;GO:0006996;GO:0006997;GO:0007009;GO:0007032;GO:0007033;GO:0007034;GO:0007041;GO:0007080;GO:0007093;GO:0007165;GO:0007346;GO:0008104;GO:0008152;GO:0009056;GO:0009057;GO:0009838;GO:0009987;GO:0010389;GO:0010564;GO:0010824;GO:0010948;GO:0010972;GO:0015031;GO:0016032;GO:0016043;GO:0016050;GO:0016192;GO:…	GO:0005488;GO:0005515;GO:0042802;GO:0042803;GO:0046983	GO:0000421;GO:0000776;GO:0000815;GO:0005643;GO:0005765;GO:0005768;GO:0005770;GO:0005771;GO:0005774;GO:0005828;GO:0005829;GO:0005874;GO:0005876;GO:0005886;GO:0009898;GO:0010008;GO:0012506;GO:0016020;GO:0030496;GO:0030659;GO:0031090;GO:0031410;GO:0031902;GO:0031982;GO:0032585;GO:0032991;GO:0036452;GO:0043226;GO:0043227;GO:0043228;GO:0043229;GO:0043231;GO:0043232;GO:0090543;GO:0097708;GO:0098552;GO:…	18	28	12.8615	13.261	12.7518	12.9423	14.0764	13.3766	12.582	13.7906	13.7694	13.0143	13.3176	13.8702	13.0617	12.2355	13.6496	13.038	13.0618	11.9187	13.1272	13.1225	12.195	12.7494	21.9957	13.2418	12.7477	11.384	12.7946	12.8221	13.1839	14.1205	23.3808	12.6728	19.1438	12.6627	22.9057
+	6.31827	1.55314	THSR[54.0106]ASSLDLNK	sp|Q8NFH8|REPS2_HUMAN	4R(54.0106)	Q8NFH8	REPS2_HUMAN	REPS2	RalBP1-associated Eps domain-containing protein 2	GO:0006810;GO:0006897;GO:0007165;GO:0007166;GO:0007167;GO:0007169;GO:0007173;GO:0009987;GO:0016043;GO:0016192;GO:0016197;GO:0022607;GO:0038127;GO:0043933;GO:0046907;GO:0050789;GO:0050794;GO:0051179;GO:0051234;GO:0051641;GO:0051649;GO:0065003;GO:0065007;GO:0071840;GO:0098657	GO:0005488;GO:0005509;GO:0043167;GO:0043169;GO:0046872	GO:0005737;GO:0005829;GO:0005886;GO:0016020;GO:0110165	487	498	17.4138	18.4715	16.4213	17.6278	18.5291	17.8194	18.7197	17.9462	19.3399	17.2805	18.1259	16.8622	15.7395	14.0802	18.046	12.3398	16.2512	12.0852	18.933	13.6132	15.685	17.5854	16.7844	16.3146	17.6192	13.2806	18.3063	17.1228	18.0404	17.705	16.5999	15.5642	18.3538	15.8729	17.0633
+	2.71553	1.5509	C[125.0477]IK[54.0106]PNETK[54.0106]R	sp|O00160|MYO1F_HUMAN	1C(125.0477),3K(54.0106),8K(54.0106)	O00160	MYO1F_HUMAN	MYO1F	Unconventional myosin-If	GO:0006810;GO:0007015;GO:0009987;GO:0016043;GO:0030029;GO:0030048;GO:0030050;GO:0030705;GO:0046907;GO:0051179;GO:0051234;GO:0051640;GO:0051641;GO:0051648;GO:0051649;GO:0051650;GO:0051656;GO:0071840;GO:0097435;GO:0099515;GO:0099518	GO:0000146;GO:0000166;GO:0003774;GO:0003779;GO:0005488;GO:0005515;GO:0005516;GO:0005524;GO:0008092;GO:0017076;GO:0030554;GO:0032553;GO:0032555;GO:0032559;GO:0035639;GO:0036094;GO:0043167;GO:0043168;GO:0044877;GO:0051015;GO:0097159;GO:0097367;GO:0140657;GO:1901265;GO:1901363	GO:0005737;GO:0005829;GO:0005856;GO:0005886;GO:0005902;GO:0015629;GO:0016020;GO:0016459;GO:0016461;GO:0031982;GO:0032991;GO:0042995;GO:0043226;GO:0043227;GO:0043228;GO:0043229;GO:0043232;GO:0098858;GO:0110165;GO:0120025	584	592	13.4103	13.2614	17.6379	13.081	14.2085	12.5541	13.2405	12.4267	14.8543	12.9126	13.0695	13.8259	12.0779	12.6354	12.6712	13.0811	20.445	12.0946	12.7146	13.7634	12.1932	13.0572	13.301	12.677	11.2804	12.35	14.3841	13.0046	11.941	12.1455	13.0627	12.6687	12.6344	13.081	12.7562
+	6.08117	1.5488	VVQHTKGCK[54.0106]R	sp|Q09472|EP300_HUMAN	9K(54.0106)	Q09472	EP300_HUMAN	EP300	Histone acetyltransferase p300	GO:0000122;GO:0001101;GO:0001666;GO:0001756;GO:0001775;GO:0001966;GO:0002209;GO:0002218;GO:0002220;GO:0002223;GO:0002253;GO:0002376;GO:0002429;GO:0002521;GO:0002682;GO:0002684;GO:0002757;GO:0002758;GO:0002764;GO:0002768;GO:0002831;GO:0002833;GO:0003002;GO:0003008;GO:0006109;GO:0006110;GO:0006111;GO:0006139;GO:0006140;GO:0006325;GO:0006338;GO:0006351;GO:0006355;GO:0006357;GO:0006366;GO:0006473;GO:…	GO:0001221;GO:0001223;GO:0002039;GO:0003676;GO:0003677;GO:0003682;GO:0003684;GO:0003712;GO:0003713;GO:0003723;GO:0003824;GO:0004402;GO:0004468;GO:0005488;GO:0005515;GO:0008013;GO:0008080;GO:0008092;GO:0008134;GO:0008270;GO:0010484;GO:0010485;GO:0016407;GO:0016410;GO:0016740;GO:0016746;GO:0016747;GO:0016922;GO:0031490;GO:0034212;GO:0036002;GO:0043167;GO:0043169;GO:0044013;GO:0044877;GO:0046872;GO:…	GO:0000123;GO:0000785;GO:0005634;GO:0005654;GO:0005667;GO:0005737;GO:0005829;GO:0031248;GO:0032991;GO:0032993;GO:0043226;GO:0043227;GO:0043229;GO:0043231;GO:0110165;GO:0140535;GO:1902493;GO:1902494;GO:1990234	1764	1773	13.8787	16.9111	12.5782	13.3431	17.8308	13.1291	13.1724	12.7836	18.3095	12.9497	18.2105	13.2109	13.1551	12.8839	18.0953	11.6995	13.6888	12.0972	18.6895	14.3224	13.2844	13.7527	14.1544	12.7941	18.3195	12.3022	18.1146	12.7856	19.1952	13.1786	12.9693	12.4443	18.4067	12.1128	12.3827
+	1.95148	1.54823	GSIHK[54.0106]FVPYLIAGIQHSCQDIGAK[54.0106]	sp|P12268|IMDH2_HUMAN	24K(54.0106),5K(54.0106)	P12268	IMDH2_HUMAN	IMPDH2	Inosine-5'-monophosphate dehydrogenase 2	GO:0001775;GO:0002376;GO:0006139;GO:0006163;GO:0006164;GO:0006177;GO:0006183;GO:0006725;GO:0006753;GO:0006793;GO:0006796;GO:0006807;GO:0007623;GO:0008152;GO:0008283;GO:0009058;GO:0009117;GO:0009123;GO:0009124;GO:0009126;GO:0009127;GO:0009141;GO:0009142;GO:0009144;GO:0009145;GO:0009150;GO:0009152;GO:0009156;GO:0009161;GO:0009165;GO:0009167;GO:0009168;GO:0009199;GO:0009201;GO:0009205;GO:0009206;GO:…	GO:0000166;GO:0003676;GO:0003677;GO:0003723;GO:0003824;GO:0003938;GO:0005488;GO:0016491;GO:0016614;GO:0016616;GO:0036094;GO:0043167;GO:0043169;GO:0046872;GO:0097159;GO:1901265;GO:1901363	GO:0005576;GO:0005634;GO:0005737;GO:0005778;GO:0005829;GO:0016020;GO:0031090;GO:0031903;GO:0031974;GO:0031982;GO:0031983;GO:0034774;GO:0042579;GO:0043226;GO:0043227;GO:0043229;GO:0043230;GO:0043231;GO:0043233;GO:0060205;GO:0065010;GO:0070013;GO:0070062;GO:0098588;GO:0110165;GO:1903561;GO:1904813	451	474	20.893	20.7423	20.8025	14.3379	21.0608	18.9881	21.0146	19.5742	19.4822	12.9785	20.6523	15.8641	18.4851	16.8874	19.964	18.323	20.0427	12.5641	20.46	22.0401	12.4836	13.3961	21.0075	20.5015	11.4527	18.3596	19.9091	19.9416	12.0159	12.896	21.6125	19.2647	21.7084	21.1146	21.0304
+	5.39963	1.54556	NGFMVSPM[15.9949]K[54.0106]PLEIK	sp|Q86TI2|DPP9_HUMAN	8M(15.9949),9K(54.0106)	Q86TI2	DPP9_HUMAN	DPP9	Dipeptidyl peptidase 9	GO:0006508;GO:0006807;GO:0008152;GO:0008219;GO:0009987;GO:0012501;GO:0019538;GO:0043067;GO:0043069;GO:0043170;GO:0044238;GO:0048519;GO:0048523;GO:0050789;GO:0050794;GO:0065007;GO:0070269;GO:0071704;GO:1901564	GO:0003824;GO:0004177;GO:0005488;GO:0005515;GO:0008233;GO:0008236;GO:0008238;GO:0008239;GO:0016787;GO:0017171;GO:0042802;GO:0140096	GO:0005634;GO:0005829;GO:0005874;GO:0031252;GO:0043226;GO:0043227;GO:0043229;GO:0043231;GO:0099080;GO:0099081;GO:0099512;GO:0099513;GO:0110165	168	181	12.1669	12.1003	15.9928	12.5105	12.8493	12.7905	12.8006	12.862	14.0503	13.5788	13.1864	13.5443	12.9141	12.9232	13.2671	12.1764	12.7211	12.6003	13.6614	14.5462	12.6229	11.8914	13.1324	12.5303	15.1053	12.1295	13.3165	12.2994	18.0141	12.8028	13.075	12.7174	11.7447	20.0572	13.4963
+	5.91696	1.54366	LGANSLLDLVVFGR[54.0106]AC[125.0477]ALSIEESCR	sp|P31040|SDHA_HUMAN	14R(54.0106),16C(125.0477)	P31040	SDHA_HUMAN	SDHA	Succinate dehydrogenase [ubiquinone] flavoprotein subunit, mitochondrial	GO:0006082;GO:0006091;GO:0006099;GO:0006105;GO:0006121;GO:0006139;GO:0006163;GO:0006164;GO:0006725;GO:0006753;GO:0006754;GO:0006793;GO:0006796;GO:0006807;GO:0007399;GO:0008152;GO:0009058;GO:0009060;GO:0009117;GO:0009141;GO:0009142;GO:0009144;GO:0009145;GO:0009150;GO:0009152;GO:0009165;GO:0009199;GO:0009201;GO:0009205;GO:0009206;GO:0009259;GO:0009260;GO:0009987;GO:0015980;GO:0015986;GO:0018130;GO:…	GO:0000104;GO:0000166;GO:0003824;GO:0005488;GO:0008177;GO:0009055;GO:0016491;GO:0016627;GO:0036094;GO:0043167;GO:0043168;GO:0050660;GO:0097159;GO:0102040;GO:1901265;GO:1901363	GO:0005730;GO:0005739;GO:0005743;GO:0005749;GO:0016020;GO:0019866;GO:0031090;GO:0031966;GO:0032991;GO:0043226;GO:0043227;GO:0043228;GO:0043229;GO:0043231;GO:0043232;GO:0045257;GO:0045281;GO:0045283;GO:0098796;GO:0098798;GO:0098800;GO:0098803;GO:0110165;GO:1902494;GO:1990204	452	476	14.2997	12.6168	13.2247	13.3577	13.1717	13.2979	13.3659	12.7844	13.5334	13.1486	13.6858	12.1412	14.3557	13.4503	16.1412	13.1672	12.6786	12.3805	15.6912	14.1096	12.8407	13.3761	13.7232	12.7262	11.7136	12.5543	13.2983	13.5476	17.1164	12.1376	13.1737	12.8729	12.8942	11.6054	12.4459
+	5.4217	1.54356	LYVAVVGDKVQLYK[54.0106]NLEEYHLGIGITFIDMSVGNVK[54.0106]	sp|Q96P48|ARAP1_HUMAN	14K(54.0106),36K(54.0106)	Q96P48	ARAP1_HUMAN	ARAP1	Arf-GAP with Rho-GAP domain, ANK repeat and PH domain-containing protein 1	GO:0001919;GO:0001921;GO:0007015;GO:0007165;GO:0008360;GO:0009893;GO:0009966;GO:0009987;GO:0010604;GO:0010639;GO:0010646;GO:0016043;GO:0019222;GO:0022603;GO:0022604;GO:0023051;GO:0023056;GO:0031344;GO:0031346;GO:0032231;GO:0032232;GO:0032956;GO:0032970;GO:0033043;GO:0043085;GO:0043087;GO:0043547;GO:0044087;GO:0044089;GO:0044093;GO:0048518;GO:0048519;GO:0048522;GO:0048523;GO:0048583;GO:0050789;GO:…	GO:0001664;GO:0005096;GO:0005102;GO:0005488;GO:0005515;GO:0005543;GO:0005547;GO:0008047;GO:0008289;GO:0030234;GO:0030695;GO:0031701;GO:0031702;GO:0035091;GO:0043167;GO:0043168;GO:0043169;GO:0046872;GO:0060589;GO:0098772;GO:0140677;GO:1901981	GO:0005654;GO:0005737;GO:0005794;GO:0005802;GO:0005829;GO:0005886;GO:0016020;GO:0031090;GO:0031984;GO:0032580;GO:0043226;GO:0043227;GO:0043229;GO:0043231;GO:0098791;GO:0110165	456	491	13.0038	13.5398	13.1259	13.5251	13.7851	13.3602	12.5533	13.0302	13.0101	13.6296	13.2399	13.1289	14.2142	12.0803	12.7362	12.0396	18.0766	12.5747	13.6444	14.4843	11.9051	13.5013	17.2484	13.1455	15.7332	12.0407	12.1236	13.8169	12.6948	11.6195	18.2765	12.5357	12.0694	12.2744	17.9032
+	3.87088	1.53968	EIPETTR[54.0106]TSQMQELHK[54.0106]	sp|O43172|PRP4_HUMAN	16K(54.0106),7R(54.0106)	O43172	PRP4_HUMAN	PRPF4	U4/U6 small nuclear ribonucleoprotein Prp4	GO:0000375;GO:0000377;GO:0000398;GO:0006139;GO:0006396;GO:0006397;GO:0006725;GO:0006807;GO:0008152;GO:0008380;GO:0009987;GO:0016070;GO:0016071;GO:0034641;GO:0043170;GO:0044237;GO:0044238;GO:0046483;GO:0071704;GO:0090304;GO:1901360	GO:0003676;GO:0003723;GO:0005488;GO:0017069;GO:0017070;GO:0030621;GO:0097159	GO:0005634;GO:0005654;GO:0005681;GO:0005684;GO:0015030;GO:0016604;GO:0016607;GO:0030532;GO:0032991;GO:0043226;GO:0043227;GO:0043229;GO:0043231;GO:0046540;GO:0071001;GO:0071005;GO:0071011;GO:0097525;GO:0097526;GO:0110165;GO:0120114;GO:0140513;GO:1990904	201	216	17.1701	18.0525	17.7732	12.1656	19.5912	18.7568	18.3709	17.7242	14.9929	13.5577	18.6545	12.9947	11.8843	13.929	13.9746	12.2151	12.8139	12.8411	11.6169	19.7925	11.8051	13.1694	16.7931	12.4014	16.8383	12.2498	18.8077	14.0235	17.493	12.5251	12.5666	12.4864	12.1331	12.3413	12.7906
+	4.62525	1.53761	MAEERPGAWFGFGFC[125.0477]GFGQELGSGR[54.0106]GR[54.0106]	sp|A6NED2|RCCD1_HUMAN	15C(125.0477),25R(54.0106),27R(54.0106)	A6NED2	RCCD1_HUMAN	RCCD1	RCC1 domain-containing protein 1	GO:0006325;GO:0009987;GO:0016043;GO:0043933;GO:0071824;GO:0071840		GO:0005694;GO:0005829;GO:0005886;GO:0016020;GO:0043226;GO:0043228;GO:0043229;GO:0043232;GO:0110165	1	27	13.6035	13.4584	12.3568	13.3034	13.8341	12.8987	12.2766	11.7803	13.8837	12.8517	12.9683	13.4876	12.4891	12.8443	13.448	12.9807	15.1426	14.4906	13.0123	15.4192	11.7498	12.2917	16.2871	14.3265	17.5183	12.5874	12.3745	13.4372	17.4526	18.6089	21.441	13.9919	12.8294	13.3902	17.8383
+	3.11467	1.53473	TGEVIFK[54.0106]DNFSSAIAGVVEGDYR	sp|Q9BXC9|BBS2_HUMAN	7K(54.0106)	Q9BXC9	BBS2_HUMAN	BBS2	Bardet-Biedl syndrome 2 protein	GO:0000226;GO:0001578;GO:0003006;GO:0003008;GO:0003012;GO:0003013;GO:0003018;GO:0003352;GO:0003356;GO:0006810;GO:0006892;GO:0006893;GO:0006936;GO:0006939;GO:0006996;GO:0007010;GO:0007017;GO:0007165;GO:0007166;GO:0007288;GO:0007600;GO:0007601;GO:0007610;GO:0008104;GO:0008152;GO:0009058;GO:0009059;GO:0009653;GO:0009887;GO:0009889;GO:0009890;GO:0009892;GO:0009987;GO:0010467;GO:0010468;GO:0010556;GO:…	GO:0005488;GO:0005515;GO:0008134;GO:0061629;GO:0140297	GO:0005815;GO:0005829;GO:0005902;GO:0005929;GO:0016020;GO:0031090;GO:0031253;GO:0031514;GO:0032420;GO:0032991;GO:0034464;GO:0036064;GO:0042995;GO:0043005;GO:0043226;GO:0043227;GO:0060170;GO:0098588;GO:0098590;GO:0098858;GO:0110165;GO:0120025	276	298	18.3979	14.3529	18.2093	18.4034	13.3776	18.0952	14.6897	18.6665	13.7001	17.4525	14.2592	15.4678	13.4319	11.9034	13.836	12.261	11.5271	11.9111	13.0007	15.4589	10.5216	17.8894	13.9046	12.7382	17.3548	11.5927	12.4363	12.679	19.0647	13.181	12.805	12.7634	14.4407	12.8091	13.6713
+	2.56706	1.53456	AFRQALQLAACGLAGGSAAVLFSAVAVGK[54.0106]PR[54.0106]	sp|Q96HS1|PGAM5_HUMAN	29K(54.0106),31R(54.0106)	Q96HS1	PGAM5_HUMAN	PGAM5	Serine/threonine-protein phosphatase PGAM5, mitochondrial	GO:0006914;GO:0008152;GO:0008219;GO:0009056;GO:0009892;GO:0009987;GO:0010638;GO:0010821;GO:0010822;GO:0012501;GO:0016236;GO:0019222;GO:0022603;GO:0033043;GO:0044237;GO:0044248;GO:0048518;GO:0048519;GO:0048522;GO:0050789;GO:0050793;GO:0050794;GO:0051094;GO:0051128;GO:0051130;GO:0051239;GO:0051241;GO:0061919;GO:0065007;GO:0070266;GO:0090140;GO:0090141;GO:0097300;GO:0120161;GO:0120163	GO:0003824;GO:0004721;GO:0004722;GO:0005096;GO:0005488;GO:0008047;GO:0016787;GO:0016788;GO:0016791;GO:0017018;GO:0030234;GO:0030695;GO:0042578;GO:0044877;GO:0060589;GO:0098772;GO:0140096;GO:0140677	GO:0005739;GO:0005741;GO:0005743;GO:0016020;GO:0019866;GO:0019867;GO:0031090;GO:0031966;GO:0031968;GO:0043226;GO:0043227;GO:0043229;GO:0043231;GO:0098588;GO:0110165	2	32	13.0189	13.5442	13.4684	19.0713	14.2944	19.0328	13.0408	19.5495	13.6436	13.5145	14.2513	22.483	13.3754	12.5473	13.3418	11.1903	12.0568	11.8543	12.768	14.3351	11.9932	12.8624	13.3517	11.6958	12.5918	12.4794	12.301	19.2435	19.1618	13.5161	13.0777	11.8052	20.5545	17.7393	12.6309
+	4.86996	1.5287	PGPGPRSASASLLPDAFALTAFECEPQALR[54.0106]	sp|Q6NV75|GP153_HUMAN	30R(54.0106)	Q6NV75	GP153_HUMAN	GPR153	Probable G-protein coupled receptor 153		GO:0004888;GO:0004930;GO:0038023;GO:0060089	GO:0005886;GO:0016020;GO:0110165	487	516	14.0096	12.7339	12.4693	18.1292	19.3621	12.4308	12.9029	13.0864	16.2263	12.8413	17.0286	12.068	12.8369	12.192	13.2223	12.016	12.7933	11.2606	18.3072	13.5891	11.997	14.4864	13.2431	17.5298	16.1941	11.7256	13.1362	13.6225	16.9215	16.4968	12.925	12.3243	18.9721	12.6459	12.8159
+	4.686	1.52712	K[54.0106]DVSSPGGSGGKK	sp|Q9UGJ0|AAKG2_HUMAN	1K(54.0106)	Q9UGJ0	AAKG2_HUMAN	PRKAG2	5'-AMP-activated protein kinase subunit gamma-2	GO:0001932;GO:0001933;GO:0001934;GO:0005975;GO:0005976;GO:0005977;GO:0006082;GO:0006091;GO:0006109;GO:0006110;GO:0006112;GO:0006139;GO:0006140;GO:0006163;GO:0006164;GO:0006469;GO:0006629;GO:0006631;GO:0006633;GO:0006694;GO:0006725;GO:0006753;GO:0006754;GO:0006793;GO:0006796;GO:0006807;GO:0007154;GO:0007165;GO:0008152;GO:0008202;GO:0008610;GO:0009058;GO:0009117;GO:0009141;GO:0009142;GO:0009144;GO:…	GO:0000166;GO:0003824;GO:0004672;GO:0004674;GO:0004679;GO:0004857;GO:0004860;GO:0004862;GO:0005488;GO:0005515;GO:0005524;GO:0008047;GO:0008603;GO:0008607;GO:0016208;GO:0016301;GO:0016740;GO:0016772;GO:0016773;GO:0017076;GO:0019207;GO:0019209;GO:0019210;GO:0019887;GO:0019899;GO:0019900;GO:0019901;GO:0030234;GO:0030291;GO:0030295;GO:0030554;GO:0032553;GO:0032555;GO:0032559;GO:0035639;GO:0036094;GO:…	GO:0005615;GO:0005634;GO:0005654;GO:0005737;GO:0005829;GO:0031588;GO:0032991;GO:0043226;GO:0043227;GO:0043229;GO:0043231;GO:0061695;GO:0110165;GO:0140535;GO:1902494;GO:1902911;GO:1990234	12	24	14.0549	13.1842	17.6929	14.0267	12.8371	14.0446	14.3904	12.0973	13.0986	13.6511	18.211	14.1681	13.2251	13.396	17.4964	12.9394	12.7353	12.6623	16.7155	14.1842	13.0398	12.9202	12.8598	17.3461	17.6612	11.5764	16.7785	17.1672	20.0375	17.7825	19.2786	12.4924	18.1072	12.9544	12.6981
+	8.20474	1.52466	VEPFTSLHVQLQSGR[54.0106]	sp|Q6ZNJ1|NBEL2_HUMAN	15R(54.0106)	Q6ZNJ1	NBEL2_HUMAN	NBEAL2	Neurobeachin-like protein 2	GO:0008104;GO:0009987;GO:0030099;GO:0030154;GO:0030220;GO:0032502;GO:0033036;GO:0048646;GO:0048869;GO:0051179;GO:0051641;GO:0070727	GO:0005488;GO:0005515;GO:0019899;GO:0019900;GO:0019901	GO:0005783;GO:0005829;GO:0005886;GO:0012506;GO:0016020;GO:0030659;GO:0030667;GO:0031090;GO:0043226;GO:0043227;GO:0043229;GO:0043231;GO:0070821;GO:0098588;GO:0101003;GO:0110165	2173	2187	11.407	13.5262	12.6246	14.0341	13.6181	13.1871	13.059	12.5087	13.9476	12.8206	12.583	12.337	13.507	12.8203	16.3564	12.3513	14.471	11.4886	16.3942	13.2316	12.7692	13.2716	13.6641	13.0153	13.2781	12.9757	13.0024	13.1729	13.0301	13.0137	12.8481	12.4236	16.5458	12.3286	16.9345
+	3.29713	1.52068	PYLFLDSTHK[54.0106]	sp|O43795|MYO1B_HUMAN	10K(54.0106)	O43795	MYO1B_HUMAN	MYO1B	Unconventional myosin-Ib	GO:0006810;GO:0006892;GO:0007015;GO:0009987;GO:0016043;GO:0016192;GO:0022607;GO:0030029;GO:0030048;GO:0030050;GO:0030705;GO:0046907;GO:0048193;GO:0051017;GO:0051179;GO:0051234;GO:0051640;GO:0051641;GO:0051648;GO:0051649;GO:0051650;GO:0051656;GO:0061572;GO:0071840;GO:0097435;GO:0099515;GO:0099518	GO:0000146;GO:0000166;GO:0003774;GO:0003779;GO:0005488;GO:0005515;GO:0005516;GO:0005524;GO:0005543;GO:0005546;GO:0005547;GO:0008092;GO:0008289;GO:0017076;GO:0030554;GO:0032553;GO:0032555;GO:0032559;GO:0035091;GO:0035639;GO:0036094;GO:0043167;GO:0043168;GO:0044877;GO:0045296;GO:0050839;GO:0051015;GO:0097159;GO:0097367;GO:0140657;GO:1901265;GO:1901363;GO:1901981;GO:1902936	GO:0005737;GO:0005768;GO:0005769;GO:0005856;GO:0005884;GO:0005886;GO:0005902;GO:0005903;GO:0010008;GO:0012506;GO:0015629;GO:0016020;GO:0016459;GO:0030175;GO:0030659;GO:0031090;GO:0031410;GO:0031982;GO:0032991;GO:0042995;GO:0043226;GO:0043227;GO:0043228;GO:0043229;GO:0043230;GO:0043231;GO:0043232;GO:0045177;GO:0048471;GO:0065010;GO:0070062;GO:0071944;GO:0097708;GO:0098588;GO:0098858;GO:0098862;GO:…	903	912	14.1559	14.3776	13.8929	13.2808	20.6928	13.0103	21.0373	12.1845	13.1614	12.768	13.0207	13.8486	12.2534	13.0069	20.0331	13.0426	12.6517	11.8766	19.8254	18.571	11.9007	12.5897	12.7898	13.6322	12.3118	12.3831	21.8009	12.739	13.126	12.9312	12.9947	12.7081	13.3706	12.789	13.1017
+	7.80491	1.52053	WGPDCIECPGGAGSPCNGR[54.0106]	sp|Q8WWQ8|STAB2_HUMAN	19R(54.0106)	Q8WWQ8	STAB2_HUMAN	STAB2	Stabilin-2	GO:0001525;GO:0006022;GO:0006026;GO:0006027;GO:0006807;GO:0006810;GO:0006897;GO:0006898;GO:0006950;GO:0006952;GO:0007155;GO:0008152;GO:0009056;GO:0009057;GO:0009605;GO:0009607;GO:0009617;GO:0009987;GO:0016192;GO:0030203;GO:0030212;GO:0030214;GO:0032502;GO:0042742;GO:0043170;GO:0043207;GO:0044419;GO:0048646;GO:0050830;GO:0050896;GO:0051179;GO:0051234;GO:0051707;GO:0071704;GO:0098542;GO:0098657;GO:…	GO:0003824;GO:0005041;GO:0005044;GO:0005488;GO:0005509;GO:0005539;GO:0005540;GO:0015035;GO:0015036;GO:0016491;GO:0016667;GO:0030169;GO:0030228;GO:0038024;GO:0043167;GO:0043169;GO:0044877;GO:0046872;GO:0071813;GO:0071814;GO:0097367;GO:0140096	GO:0005829;GO:0005886;GO:0009897;GO:0012506;GO:0016020;GO:0030659;GO:0030666;GO:0031090;GO:0098552;GO:0098588;GO:0110165	105	123	14.2797	11.7636	14.9897	13.3535	15.3177	13.3076	14.4147	11.5366	14.2996	12.3662	14.2889	12.3277	13.3795	14.1723	15.2853	11.5037	15.7478	11.2478	14.9358	13.8107	11.7026	12.6768	15.5594	11.8136	14.9791	12.2123	13.9385	13.4375	16.5259	13.2636	15.6871	11.9359	14.7955	11.8244	16.9815
+	7.41397	1.51945	IDYERVSQER[54.0106]	sp|P15924|DESP_HUMAN	10R(54.0106)	P15924	DESP_HUMAN	DSP	Desmoplakin	GO:0002027;GO:0002934;GO:0003223;GO:0006807;GO:0006937;GO:0006942;GO:0006950;GO:0006996;GO:0007010;GO:0007155;GO:0008016;GO:0008104;GO:0008152;GO:0008544;GO:0009611;GO:0009653;GO:0009888;GO:0009913;GO:0009987;GO:0016043;GO:0018149;GO:0019538;GO:0030154;GO:0030216;GO:0030855;GO:0032502;GO:0032970;GO:0033036;GO:0034109;GO:0034113;GO:0034330;GO:0034332;GO:0036211;GO:0042060;GO:0042391;GO:0043170;GO:…	GO:0003676;GO:0003723;GO:0005080;GO:0005198;GO:0005200;GO:0005488;GO:0005515;GO:0019899;GO:0019900;GO:0019901;GO:0050839;GO:0086080;GO:0086083;GO:0097110;GO:0097159;GO:0098631;GO:0098632	GO:0001533;GO:0005634;GO:0005737;GO:0005882;GO:0005886;GO:0005911;GO:0005912;GO:0005916;GO:0012506;GO:0014704;GO:0016020;GO:0016323;GO:0030054;GO:0030057;GO:0030659;GO:0030667;GO:0031090;GO:0031982;GO:0043226;GO:0043227;GO:0043229;GO:0043230;GO:0043231;GO:0044291;GO:0065010;GO:0070062;GO:0070161;GO:0098588;GO:0098590;GO:0099080;GO:0099081;GO:0099512;GO:0099513;GO:0101003;GO:0110165;GO:1903561	1540	1549	13.0434	13.0291	15.7701	13.3193	13.208	13.7028	13.5717	13.3564	14.2935	12.7672	13.4599	12.4803	12.7499	12.8194	13.4671	11.3299	17.0967	11.5457	12.6046	12.9935	11.2073	13.4987	16.9021	12.4136	15.4813	11.2859	14.1578	13.113	11.4255	12.9155	12.5502	11.2862	13.6212	12.2426	16.2987
+	13.6964	1.5163	FHTSYDK[54.0106]R	sp|P48426|PI42A_HUMAN	7K(54.0106)	P48426	PI42A_HUMAN	PIP4K2A	Phosphatidylinositol 5-phosphate 4-kinase type-2 alpha	GO:0006629;GO:0006644;GO:0006650;GO:0006661;GO:0006793;GO:0006796;GO:0006810;GO:0006869;GO:0006906;GO:0006996;GO:0008152;GO:0008610;GO:0008654;GO:0009058;GO:0009893;GO:0009894;GO:0009896;GO:0009966;GO:0009968;GO:0009987;GO:0010506;GO:0010508;GO:0010638;GO:0010646;GO:0010648;GO:0015850;GO:0015918;GO:0016043;GO:0016050;GO:0016192;GO:0016239;GO:0016241;GO:0016310;GO:0016482;GO:0019222;GO:0019637;GO:…	GO:0000166;GO:0001727;GO:0003824;GO:0005488;GO:0005515;GO:0005524;GO:0016301;GO:0016308;GO:0016309;GO:0016740;GO:0016772;GO:0016773;GO:0017076;GO:0030554;GO:0032553;GO:0032555;GO:0032559;GO:0035639;GO:0036094;GO:0042802;GO:0042803;GO:0043167;GO:0043168;GO:0046983;GO:0052742;GO:0097159;GO:0097367;GO:1901265;GO:1901363	GO:0000323;GO:0001750;GO:0001917;GO:0005654;GO:0005764;GO:0005773;GO:0005776;GO:0005829;GO:0005886;GO:0016020;GO:0043226;GO:0043227;GO:0043229;GO:0043231;GO:0110165	134	141	15.7458	12.4769	13.6262	13.4771	16.1924	12.813	15.4876	12.322	14.3513	14.3025	14.5633	13.1415	15.6267	14.6659	16.0548	14.7024	16.5694	11.8603	16.1731	13.9452	12.9897	13.8933	15.9619	14.8731	15.8533	12.5084	15.6206	13.3505	15.7455	14.6024	16.1451	15.7484	15.6767	12.844	15.9978
+	6.21778	1.51362	QK[54.0106]VHC[125.0477]LNTLFSR	sp|P26196|DDX6_HUMAN	2K(54.0106),5C(125.0477)	P26196	DDX6_HUMAN	DDX6	Probable ATP-dependent RNA helicase DDX6	GO:0006417;GO:0006996;GO:0009889;GO:0009890;GO:0009892;GO:0009987;GO:0010468;GO:0010556;GO:0010558;GO:0010605;GO:0010608;GO:0010629;GO:0016032;GO:0016043;GO:0016441;GO:0017148;GO:0019072;GO:0019074;GO:0019222;GO:0019827;GO:0022607;GO:0030154;GO:0030182;GO:0031047;GO:0031323;GO:0031324;GO:0031326;GO:0031327;GO:0032501;GO:0032502;GO:0033962;GO:0034063;GO:0034248;GO:0034249;GO:0035194;GO:0035195;GO:…	GO:0000166;GO:0003676;GO:0003723;GO:0003724;GO:0003729;GO:0003824;GO:0004386;GO:0005488;GO:0005515;GO:0005524;GO:0008186;GO:0016462;GO:0016787;GO:0016817;GO:0016818;GO:0016887;GO:0017076;GO:0017111;GO:0019904;GO:0030554;GO:0032553;GO:0032555;GO:0032559;GO:0035639;GO:0036094;GO:0043167;GO:0043168;GO:0045296;GO:0050839;GO:0097159;GO:0097367;GO:0140098;GO:0140640;GO:0140657;GO:1901265;GO:1901363	GO:0000932;GO:0005634;GO:0005737;GO:0005829;GO:0010494;GO:0016020;GO:0016442;GO:0031332;GO:0032991;GO:0035770;GO:0036464;GO:0043226;GO:0043227;GO:0043228;GO:0043229;GO:0043231;GO:0043232;GO:0099080;GO:0110165;GO:1990904	320	331	15.3808	13.3874	12.2203	13.5124	17.3036	12.5989	17.3169	12.7104	17.7998	12.4717	16.8647	13.604	13.4594	13.2213	12.3374	12.3394	11.8445	12.4765	12.5209	18.0696	11.2967	14.3904	13.5378	13.3204	13.5891	11.956	12.6206	12.4576	13.1091	12.7784	13.0887	12.9767	18.1914	12.599	12.9938
+	3.61713	1.51244	M[15.9949]VLSELAAR[54.0106]LNC[130.0791]AEYKNWVK	sp|Q8TB03|CX038_HUMAN	12C(130.0791),1M(15.9949),9R(54.0106)	Q8TB03	CX038_HUMAN	CXorf38	Uncharacterized protein CXorf38				1	20	13.7141	11.927	12.834	13.1081	21.2776	12.9581	19.6734	12.4019	21.654	11.7536	13.2477	12.549	12.8	12.7547	12.9586	11.6526	13.0673	12.5873	18.8503	13.6444	12.6858	12.6355	13.5985	11.9588	13.2012	12.1353	11.7078	12.4333	12.6615	11.9606	13.1901	12.3928	18.685	11.9602	18.6315
+	2.85503	1.5099	KM[15.9949]TTSTDHLK[54.0106]RGTILDC[125.0477]NTCK	sp|P56199|ITA1_HUMAN	10K(54.0106),17C(125.0477),2M(15.9949)	P56199	ITA1_HUMAN	ITGA1	Integrin alpha-1	GO:0002376;GO:0003008;GO:0003013;GO:0003018;GO:0006935;GO:0007155;GO:0007160;GO:0007165;GO:0007166;GO:0007229;GO:0008285;GO:0009653;GO:0009893;GO:0009966;GO:0009967;GO:0009968;GO:0009987;GO:0010562;GO:0010604;GO:0010646;GO:0010647;GO:0010648;GO:0010921;GO:0010922;GO:0016043;GO:0016477;GO:0019220;GO:0019222;GO:0023051;GO:0023056;GO:0023057;GO:0030030;GO:0030593;GO:0030595;GO:0031323;GO:0031325;GO:…	GO:0005102;GO:0005178;GO:0005488;GO:0005515;GO:0005518;GO:0019899;GO:0019902;GO:0019903;GO:0043167;GO:0043169;GO:0044877;GO:0046872;GO:0050839;GO:0098631;GO:0098634;GO:0098639	GO:0001669;GO:0005886;GO:0005925;GO:0008305;GO:0009897;GO:0009986;GO:0016020;GO:0030054;GO:0030055;GO:0030141;GO:0031410;GO:0031982;GO:0032991;GO:0034665;GO:0043204;GO:0043226;GO:0043227;GO:0043229;GO:0043230;GO:0043231;GO:0043235;GO:0045178;GO:0065010;GO:0070062;GO:0070161;GO:0097708;GO:0098552;GO:0098636;GO:0098796;GO:0098797;GO:0098802;GO:0099503;GO:0110165;GO:1903561	1046	1066	11.6919	12.2244	12.7821	12.457	20.3819	13.6185	19.7725	12.2745	13.6135	13.6408	18.8985	14.0484	16.3899	15.5309	18.8714	17.1521	17.5866	16.733	19.6499	21.1801	13.1852	13.9055	18.1301	18.7032	13.4492	15.8668	19.5952	17.994	18.854	19.2742	18.703	17.5054	21.0631	17.593	19.2176
+	5.98934	1.50833	EKEC[130.0791]LQAC[125.0477]LDK[54.0106]K	sp|Q9BZW7|TSG10_HUMAN	11K(54.0106),4C(130.0791),8C(125.0477)	Q9BZW7	TSG10_HUMAN	TSGA10	Testis-specific gene 10 protein	GO:0003006;GO:0007276;GO:0007283;GO:0022414;GO:0032502;GO:0048232;GO:0048609		GO:0005737;GO:0005814;GO:0005929;GO:0031514;GO:0042995;GO:0043226;GO:0043227;GO:0043228;GO:0043229;GO:0043232;GO:0110165;GO:0120025	269	280	12.6537	14.0916	15.1295	13.1338	14.7225	13.0454	14.2576	13.1412	14.0628	12.6609	14.4047	13.5461	12.5601	13.8067	13.7547	11.5678	15.3403	12.3574	13.3538	14.4632	12.8791	12.6151	13.6436	12.718	16.0208	12.1051	13.3014	12.354	16.5377	13.6865	16.4161	12.5096	13.3802	12.3602	17.1817
+	9.39823	1.50625	RAATSVAICPPIPYYLAVGCSDSSVR[54.0106]	sp|Q58WW2|DCAF6_HUMAN	26R(54.0106)	Q58WW2	DCAF6_HUMAN	DCAF6	DDB1- and CUL4-associated factor 6	GO:0006355;GO:0006357;GO:0006807;GO:0008152;GO:0009889;GO:0009891;GO:0009893;GO:0010468;GO:0010556;GO:0010557;GO:0010604;GO:0016567;GO:0019219;GO:0019222;GO:0019538;GO:0031323;GO:0031325;GO:0031326;GO:0031328;GO:0032446;GO:0036211;GO:0043170;GO:0043412;GO:0043687;GO:0044238;GO:0045893;GO:0045935;GO:0045944;GO:0048518;GO:0048522;GO:0050789;GO:0050794;GO:0051171;GO:0051173;GO:0051252;GO:0051254;GO:…	GO:0003712;GO:0003713;GO:0030374;GO:0140110	GO:0000151;GO:0005634;GO:0005654;GO:0005737;GO:0005829;GO:0005925;GO:0030054;GO:0030055;GO:0031461;GO:0032991;GO:0043226;GO:0043227;GO:0043229;GO:0043231;GO:0070161;GO:0080008;GO:0110165;GO:0140535;GO:1902494;GO:1990234	192	217	12.07	12.5944	13.6141	13.4632	13.4886	13.7947	14.6761	12.7704	14.1045	13.3593	13.2564	12.4151	13.4341	12.4223	16.4552	12.4405	12.4424	12.2491	17.0152	13.7132	11.8887	11.9646	14.0788	12.0199	12.3751	12.835	13.8185	12.7385	16.4451	11.2472	13.1038	12.9157	12.8135	13.7833	13.9989
+	8.74061	1.49969	AK[54.0106]DSAK[54.0106]TTEETSK	sp|P20810|ICAL_HUMAN	2K(54.0106),6K(54.0106)	P20810	ICAL_HUMAN	CAST	Calpastatin	GO:0009889;GO:0009890;GO:0009892;GO:0009987;GO:0010466;GO:0010468;GO:0010556;GO:0010558;GO:0010605;GO:0010629;GO:0010951;GO:0010955;GO:0016043;GO:0019222;GO:0030162;GO:0031323;GO:0031324;GO:0031326;GO:0031327;GO:0042981;GO:0043066;GO:0043067;GO:0043069;GO:0043086;GO:0044092;GO:0045861;GO:0048519;GO:0048523;GO:0050789;GO:0050790;GO:0050794;GO:0051171;GO:0051172;GO:0051246;GO:0051248;GO:0051336;GO:…	GO:0003676;GO:0003723;GO:0004857;GO:0004866;GO:0004869;GO:0005488;GO:0005515;GO:0010859;GO:0030234;GO:0030414;GO:0045296;GO:0050839;GO:0061134;GO:0061135;GO:0097159;GO:0098772;GO:0140678	GO:0005737;GO:0005783;GO:0005829;GO:0016020;GO:0043226;GO:0043227;GO:0043229;GO:0043231;GO:0110165	692	704	14.0032	13.7816	13.0622	12.4108	13.0165	12.8976	13.0062	13.0154	13.3401	13.1953	13.115	14.2986	14.307	12.2407	12.3317	12.3202	12.4014	11.8976	12.2464	14.4924	12.9792	14.6509	13.0135	12.8849	14.8394	12.3871	12.9587	13.4775	16.2301	12.0934	12.7848	12.9426	13.8943	11.6627	16.7496
+	5.76159	1.48973	HQELFVDIC[130.0791]SEK[54.0106]DNLR[54.0106]	sp|Q7Z3E2|CC186_HUMAN	12K(54.0106),16R(54.0106),9C(130.0791)	Q7Z3E2	CC186_HUMAN	CCDC186	Coiled-coil domain-containing protein 186	GO:0002790;GO:0006810;GO:0008104;GO:0009306;GO:0009605;GO:0009607;GO:0009617;GO:0009914;GO:0009987;GO:0010817;GO:0015031;GO:0015833;GO:0023061;GO:0030072;GO:0030073;GO:0030705;GO:0032940;GO:0033036;GO:0035592;GO:0035773;GO:0042886;GO:0043207;GO:0044419;GO:0045184;GO:0046879;GO:0046903;GO:0046907;GO:0050896;GO:0051179;GO:0051234;GO:0051640;GO:0051641;GO:0051648;GO:0051649;GO:0051650;GO:0051656;GO:…	GO:0005488;GO:0005515;GO:0019899;GO:0031267;GO:0051020	GO:0005802;GO:0031984;GO:0098791;GO:0110165	219	234	14.5294	13.9008	12.7683	13.4257	13.9949	13.6661	13.9669	12.9473	17.7425	12.631	13.8323	13.7744	14.1794	12.7332	13.2439	11.524	12.4332	11.7851	12.6436	17.2302	12.3088	13.0501	12.4873	13.278	12.6027	13.23	13.3558	13.2233	15.2691	12.7586	12.313	12.0172	16.8193	12.7325	12.9197
+	9.23242	1.48325	AAWGK[54.0106]VGAHAGEYGAEALER	sp|P69905|HBA_HUMAN	5K(54.0106)	P69905	HBA_HUMAN	HBA2	Hemoglobin subunit alpha	GO:0000302;GO:0006810;GO:0006950;GO:0006979;GO:0008152;GO:0009056;GO:0009987;GO:0010033;GO:0010035;GO:0015669;GO:0015670;GO:0015671;GO:0019755;GO:0030185;GO:0042221;GO:0042542;GO:0042743;GO:0042744;GO:0044237;GO:0044248;GO:0050896;GO:0051179;GO:0051234;GO:0071702;GO:0071704;GO:0071705;GO:0072593;GO:0098754;GO:0098869;GO:1901575;GO:1901700;GO:1990748	GO:0005344;GO:0005488;GO:0005506;GO:0019825;GO:0020037;GO:0036094;GO:0043167;GO:0043169;GO:0043177;GO:0046872;GO:0046906;GO:0046914;GO:0097159;GO:0140104	GO:0005576;GO:0005615;GO:0005829;GO:0005833;GO:0016020;GO:0031838;GO:0031974;GO:0031982;GO:0032991;GO:0043226;GO:0043227;GO:0043230;GO:0043233;GO:0065010;GO:0070013;GO:0070062;GO:0071682;GO:0072562;GO:0110165;GO:1903561	13	32	13.2322	14.2286	13.3892	14.4308	15.0238	13.67	15.5469	13.1125	16.3538	13.3515	13.1556	12.0343	12.9507	13.2856	15.751	12.2666	13.9596	12.2835	13.4816	16.6395	17.533	13.7693	14.8284	13.3256	15.2529	13.1706	13.1418	12.7394	13.2857	12.1547	14.3247	12.3467	15.5998	13.0061	15.9138
+	6.81344	1.4826	VC[125.0477]GK[54.0106]IGHYMKDC[125.0477]PKR	sp|Q5TAX3|TUT4_HUMAN	12C(125.0477),2C(125.0477),4K(54.0106)	Q5TAX3	TUT4_HUMAN	TUT4	Terminal uridylyltransferase 4	GO:0000289;GO:0000956;GO:0001556;GO:0003006;GO:0006139;GO:0006396;GO:0006401;GO:0006402;GO:0006725;GO:0006807;GO:0008152;GO:0009056;GO:0009057;GO:0009889;GO:0009890;GO:0009892;GO:0009893;GO:0009894;GO:0009896;GO:0009987;GO:0010468;GO:0010526;GO:0010556;GO:0010558;GO:0010586;GO:0010587;GO:0010604;GO:0010605;GO:0010608;GO:0010629;GO:0016070;GO:0016071;GO:0019219;GO:0019222;GO:0019439;GO:0019827;GO:…	GO:0003676;GO:0003723;GO:0003824;GO:0005488;GO:0008270;GO:0016740;GO:0016772;GO:0016779;GO:0035198;GO:0043167;GO:0043169;GO:0046872;GO:0046914;GO:0050265;GO:0061980;GO:0070569;GO:0097159;GO:0140098;GO:0140640	GO:0005615;GO:0005730;GO:0005737;GO:0005829;GO:0031982;GO:0035770;GO:0036464;GO:0043226;GO:0043227;GO:0043228;GO:0043229;GO:0043230;GO:0043232;GO:0065010;GO:0070062;GO:0099080;GO:0110165;GO:1903561	1297	1311	12.1944	13.6636	12.592	13.5834	13.6167	13.7275	13.2542	12.5203	12.9582	12.9083	13.5135	12.9275	12.6039	12.9236	15.8037	12.5741	12.3794	12.7324	12.3004	14.3487	12.1738	12.3591	13.2512	13.6167	13.8414	12.9366	13.1056	13.0203	15.3856	12.326	13.4096	12.5443	15.9819	13.0148	12.9892
+	5.65819	1.4814	K[54.0106]GDR[54.0106]SPEPGQTWTR	sp|Q09666|AHNK_HUMAN	1K(54.0106),4R(54.0106)	Q09666	AHNK_HUMAN	AHNAK	Neuroblast differentiation-associated protein AHNAK	GO:0009889;GO:0010468;GO:0010556;GO:0010959;GO:0019219;GO:0019222;GO:0022898;GO:0031323;GO:0031326;GO:0032409;GO:0032412;GO:0032879;GO:0034762;GO:0034765;GO:0043269;GO:0043484;GO:0048518;GO:0048522;GO:0050789;GO:0050794;GO:0051049;GO:0051128;GO:0051130;GO:0051171;GO:0051252;GO:0051924;GO:0060255;GO:0065007;GO:0065009;GO:0080090;GO:1901019;GO:1901385;GO:1903169;GO:1903729;GO:1904062;GO:1905684;GO:…	GO:0003676;GO:0003723;GO:0005198;GO:0005488;GO:0005515;GO:0042802;GO:0044548;GO:0045296;GO:0050839;GO:0097159;GO:0097493	GO:0005634;GO:0005737;GO:0005765;GO:0005774;GO:0005829;GO:0005856;GO:0005886;GO:0005911;GO:0005925;GO:0015629;GO:0016020;GO:0030054;GO:0030055;GO:0030315;GO:0031090;GO:0031982;GO:0032991;GO:0042383;GO:0043034;GO:0043226;GO:0043227;GO:0043228;GO:0043229;GO:0043230;GO:0043231;GO:0043232;GO:0044291;GO:0065010;GO:0070062;GO:0070161;GO:0098588;GO:0098796;GO:0098797;GO:0098852;GO:0110165;GO:1903561	89	102	13.2375	13.4822	12.3656	12.2727	12.0695	13.2036	13.5792	13.2918	13.5012	12.9987	13.9652	13.0028	12.4412	12.8067	17.6009	11.556	11.698	11.8322	13.8955	13.2751	11.772	13.2387	13.892	11.6998	13.0691	12.1022	13.2098	13.3172	12.8433	11.4147	12.6629	14.077	18.365	13.2212	13.0621
+	3.67474	1.48076	TGFLIC[125.0477]AFLVEK[54.0106]MDWSIEAAVATFAQAR	sp|O60942|MCE1_HUMAN	12K(54.0106),6C(125.0477)	O60942	MCE1_HUMAN	RNGTT	mRNA-capping enzyme	GO:0006139;GO:0006370;GO:0006396;GO:0006397;GO:0006725;GO:0006793;GO:0006796;GO:0006807;GO:0008152;GO:0009452;GO:0009987;GO:0016070;GO:0016071;GO:0016311;GO:0034641;GO:0036260;GO:0043170;GO:0044237;GO:0044238;GO:0046483;GO:0071704;GO:0090304;GO:1901360	GO:0000166;GO:0003824;GO:0004484;GO:0004651;GO:0004721;GO:0005488;GO:0005524;GO:0005525;GO:0008138;GO:0008192;GO:0016462;GO:0016740;GO:0016772;GO:0016779;GO:0016787;GO:0016788;GO:0016791;GO:0016817;GO:0016818;GO:0017076;GO:0019001;GO:0030554;GO:0032553;GO:0032555;GO:0032559;GO:0032561;GO:0035639;GO:0036094;GO:0042578;GO:0043167;GO:0043168;GO:0050355;GO:0070568;GO:0097159;GO:0097367;GO:0140096;GO:…	GO:0005634;GO:0005654;GO:0043226;GO:0043227;GO:0043229;GO:0043231;GO:0110165	133	160	19.5332	13.7616	19.4662	12.4531	14.0269	13.0728	14.5296	12.4224	12.5344	13.1435	11.5703	13.4222	13.5486	12.8513	12.4622	12.346	12.4225	11.7495	13.1789	13.5637	13.7484	13.7877	13.8654	12.7611	13.092	11.8568	12.3539	12.105	12.3175	12.8349	13.0803	12.2534	12.6944	12.4745	13.057
+	2.57757	1.47703	GQLEALQVDGGR[54.0106]	sp|P08729|K2C7_HUMAN	12R(54.0106)	P08729	K2C7_HUMAN	KRT7	Keratin, type II cytoskeletal 7	GO:0006996;GO:0007010;GO:0009987;GO:0016043;GO:0031424;GO:0032501;GO:0045103;GO:0045104;GO:0045109;GO:0071840;GO:0097435	GO:0005198;GO:0030280	GO:0005634;GO:0005737;GO:0005829;GO:0005856;GO:0005882;GO:0031982;GO:0043226;GO:0043227;GO:0043228;GO:0043229;GO:0043230;GO:0043231;GO:0043232;GO:0045095;GO:0045111;GO:0065010;GO:0070062;GO:0099080;GO:0099081;GO:0099512;GO:0099513;GO:0110165;GO:1903561	150	161	13.0744	19.5511	12.9	11.995	21.5591	11.9081	12.7294	13.0561	21.8142	14.2546	20.6076	13.5671	13.018	16.2374	21.0222	17.902	12.5828	17.8712	21.2137	14.4146	12.8763	12.4807	13.2025	11.3989	20.1142	15.2723	21.0818	12.9397	20.4206	12.3473	13.2759	12.6644	21.6076	13.3254	11.9328
+	3.72747	1.47622	LR[54.0106]KQVEEIFNLK[54.0106]FAQALGLTEAVK[54.0106]	sp|P78347|GTF2I_HUMAN	12K(54.0106),24K(54.0106),2R(54.0106)	P78347	GTF2I_HUMAN	GTF2I	General transcription factor II-I	GO:0006139;GO:0006351;GO:0006355;GO:0006357;GO:0006366;GO:0006725;GO:0006807;GO:0008152;GO:0009058;GO:0009059;GO:0009889;GO:0009891;GO:0009893;GO:0009987;GO:0010468;GO:0010556;GO:0010557;GO:0010604;GO:0016070;GO:0016525;GO:0018130;GO:0019219;GO:0019222;GO:0019438;GO:0022603;GO:0031323;GO:0031325;GO:0031326;GO:0031328;GO:0032774;GO:0034641;GO:0034654;GO:0043170;GO:0044237;GO:0044238;GO:0044249;GO:…	GO:0000981;GO:0001216;GO:0001228;GO:0003676;GO:0003677;GO:0003700;GO:0005488;GO:0005515;GO:0008134;GO:0061629;GO:0097159;GO:0140110;GO:0140297	GO:0005634;GO:0005654;GO:0005737;GO:0016020;GO:0043226;GO:0043227;GO:0043229;GO:0043231;GO:0110165	571	594	13.5188	12.7686	13.994	13.1104	12.3383	12.3544	13.1777	13.244	15.1498	13.2015	13.5553	11.5781	11.9636	12.5885	13.7452	12.468	12.4896	12.0887	12.3105	13.908	11.838	13.7642	13.1251	17.5609	11.5025	11.8474	12.7894	12.498	11.9459	18.2669	11.4888	13.161	21.6256	12.9003	12.1799
+	10.6371	1.47319	TGQYKLGSK[54.0106]TGPGQK	sp|P09038|FGF2_HUMAN	9K(54.0106)	P09038	FGF2_HUMAN	FGF2	Fibroblast growth factor 2	GO:0000165;GO:0001525;GO:0001649;GO:0001658;GO:0001667;GO:0001759;GO:0001763;GO:0001932;GO:0001934;GO:0001935;GO:0001936;GO:0001938;GO:0002009;GO:0002042;GO:0002052;GO:0002065;GO:0002067;GO:0003156;GO:0006022;GO:0006026;GO:0006027;GO:0006066;GO:0006139;GO:0006351;GO:0006355;GO:0006357;GO:0006366;GO:0006629;GO:0006644;GO:0006650;GO:0006661;GO:0006725;GO:0006793;GO:0006796;GO:0006807;GO:0006810;GO:…	GO:0003712;GO:0003713;GO:0005102;GO:0005104;GO:0005125;GO:0005178;GO:0005488;GO:0005515;GO:0005539;GO:0008083;GO:0008201;GO:0019955;GO:0019956;GO:0030374;GO:0030545;GO:0030546;GO:0042056;GO:0042802;GO:0044877;GO:0048018;GO:0050839;GO:0070851;GO:0090722;GO:0097367;GO:0098772;GO:0140110;GO:0140677;GO:1901681	GO:0005576;GO:0005615;GO:0005634;GO:0005737;GO:0043226;GO:0043227;GO:0043229;GO:0043231;GO:0110165	263	277	13.4587	12.0835	15.6633	12.8239	12.7089	12.9104	13.3548	12.956	14.8712	13.242	13.7019	12.8934	12.5415	12.3457	12.84	12.1427	13.2003	12.1014	12.8912	12.602	11.7304	12.5408	13.2647	13.2282	15.5667	12.463	12.9107	12.3525	13.5819	13.9965	13.3093	11.7814	12.7148	12.9309	13.0443
+	6.15807	1.4624	SLGRGAFGKVVQASAFGIK[54.0106]K	sp|P17948|VGFR1_HUMAN	19K(54.0106)	P17948	VGFR1_HUMAN	FLT1	Vascular endothelial growth factor receptor 1	GO:0001525;GO:0001932;GO:0001934;GO:0001936;GO:0001937;GO:0002376;GO:0002548;GO:0006468;GO:0006793;GO:0006796;GO:0006807;GO:0006935;GO:0007165;GO:0007166;GO:0007167;GO:0007169;GO:0008152;GO:0008284;GO:0008285;GO:0009653;GO:0009719;GO:0009893;GO:0009966;GO:0009967;GO:0009987;GO:0010517;GO:0010518;GO:0010562;GO:0010604;GO:0010646;GO:0010647;GO:0010863;GO:0016310;GO:0016477;GO:0018108;GO:0018193;GO:…	GO:0000166;GO:0003824;GO:0004672;GO:0004713;GO:0004714;GO:0004888;GO:0005021;GO:0005488;GO:0005515;GO:0005524;GO:0016301;GO:0016740;GO:0016772;GO:0016773;GO:0017076;GO:0019199;GO:0019838;GO:0030554;GO:0032553;GO:0032555;GO:0032559;GO:0035639;GO:0036094;GO:0036332;GO:0038023;GO:0043167;GO:0043168;GO:0060089;GO:0097159;GO:0097367;GO:0140096;GO:1901265;GO:1901363	GO:0005615;GO:0005768;GO:0005856;GO:0005886;GO:0005925;GO:0015629;GO:0016020;GO:0030054;GO:0030055;GO:0031410;GO:0031982;GO:0032991;GO:0043226;GO:0043227;GO:0043228;GO:0043229;GO:0043231;GO:0043232;GO:0043235;GO:0070161;GO:0097708;GO:0110165	832	851	13.1252	18.0549	12.7925	13.8639	18.1679	13.3573	14.8299	12.625	20.3368	11.8703	17.9412	13.4705	13.6651	12.8533	18.4243	11.7997	12.6544	10.7854	17.5011	13.8038	13.2431	12.089	14.1014	11.2348	16.2545	12.748	15.5555	12.7479	16.4413	12.4834	13.3914	13.856	16.3337	11.7462	12.5518
+	6.44183	1.4617	MLR[54.0106]PAGLWR	sp|Q5TEU4|NDUF5_HUMAN	3R(54.0106)	Q5TEU4	NDUF5_HUMAN	NDUFAF5	Arginine-hydroxylase NDUFAF5, mitochondrial	GO:0006807;GO:0008152;GO:0009987;GO:0010257;GO:0016043;GO:0018193;GO:0018195;GO:0019538;GO:0022607;GO:0030961;GO:0032259;GO:0032981;GO:0033108;GO:0036211;GO:0043170;GO:0043412;GO:0043933;GO:0044238;GO:0065003;GO:0071704;GO:0071840;GO:1901564	GO:0003824;GO:0008168;GO:0008757;GO:0016491;GO:0016740;GO:0016741	GO:0005739;GO:0005743;GO:0016020;GO:0019866;GO:0031090;GO:0031966;GO:0043226;GO:0043227;GO:0043229;GO:0043231;GO:0098552;GO:0098576;GO:0099617;GO:0110165	1	9	16.0489	16.9491	14.4155	16.7057	17.6144	15.5403	18.1116	14.7018	17.73	15.6035	15.3843	14.8296	15.9101	12.3281	16.4973	12.5116	15.4853	11.8782	15.5865	17.8382	13.7162	15.7137	16.3315	16.8122	14.5211	13.0093	16.1292	16.1045	15.4433	14.25	15.6822	14.5711	12.5694	15.2808	15.798
+	7.08677	1.45705	AVDALAALQDFYHR[54.0106]EHVTKTQILCAERR	sp|Q96C10|DHX58_HUMAN	14R(54.0106)	Q96C10	DHX58_HUMAN	DHX58	ATP-dependent RNA helicase DHX58	GO:0001817;GO:0001818;GO:0001819;GO:0002218;GO:0002221;GO:0002253;GO:0002376;GO:0002682;GO:0002683;GO:0002684;GO:0002697;GO:0002699;GO:0002753;GO:0002757;GO:0002758;GO:0002764;GO:0002831;GO:0002832;GO:0002833;GO:0006950;GO:0006952;GO:0006955;GO:0007165;GO:0009605;GO:0009607;GO:0009615;GO:0009617;GO:0009889;GO:0009890;GO:0009891;GO:0009892;GO:0009893;GO:0009966;GO:0009967;GO:0009968;GO:0009987;GO:…	GO:0000166;GO:0003676;GO:0003677;GO:0003723;GO:0003724;GO:0003725;GO:0003727;GO:0003824;GO:0004386;GO:0005488;GO:0005524;GO:0008186;GO:0008270;GO:0016462;GO:0016787;GO:0016817;GO:0016818;GO:0016887;GO:0017076;GO:0017111;GO:0030554;GO:0032553;GO:0032555;GO:0032559;GO:0035639;GO:0036094;GO:0043167;GO:0043168;GO:0043169;GO:0046872;GO:0046914;GO:0097159;GO:0097367;GO:0140098;GO:0140640;GO:0140657;GO:…	GO:0005737;GO:0110165	299	326	11.8654	12.935	13.1429	13.0369	13.4057	14.0625	17.01	12.4726	13.8036	12.1625	12.464	13.6986	14.1091	12.5731	16.3479	12.7893	11.8367	12.173	16.9132	18.3491	12.0571	13.8458	13.0702	13.1006	12.389	12.594	16.8434	12.5893	11.1121	13.7157	12.4967	12.0462	14.0843	12.1522	14.2707
+	4.91569	1.45632	GNAGGIQPDLLISLTAPK[54.0106]K[54.0106]SATQFTGR[54.0106]	sp|Q8NCW5|NNRE_HUMAN	18K(54.0106),19K(54.0106),27R(54.0106)	Q8NCW5	NNRE_HUMAN	NAXE	NAD(P)H-hydrate epimerase	GO:0001525;GO:0002040;GO:0006139;GO:0006725;GO:0006753;GO:0006793;GO:0006796;GO:0006807;GO:0006810;GO:0006869;GO:0008152;GO:0009117;GO:0009987;GO:0010874;GO:0016043;GO:0016525;GO:0019362;GO:0019637;GO:0022603;GO:0031579;GO:0031580;GO:0032368;GO:0032371;GO:0032374;GO:0032502;GO:0032879;GO:0034641;GO:0044237;GO:0044238;GO:0044281;GO:0045765;GO:0046483;GO:0046496;GO:0048519;GO:0048646;GO:0050789;GO:…	GO:0000166;GO:0003824;GO:0005488;GO:0005515;GO:0016853;GO:0016854;GO:0036094;GO:0042802;GO:0043167;GO:0043169;GO:0046872;GO:0052856;GO:0052857;GO:0097159;GO:1901265;GO:1901363	GO:0005576;GO:0005615;GO:0005759;GO:0005929;GO:0031974;GO:0031982;GO:0042995;GO:0043226;GO:0043227;GO:0043230;GO:0043233;GO:0044297;GO:0065010;GO:0070013;GO:0070062;GO:0110165;GO:0120025;GO:1903561	228	254	12.9598	13.3875	13.6301	13.5825	20.1936	13.7368	13.9633	13.4588	16.7533	13.1523	13.0065	12.4985	12.8845	13.3398	18.9796	13.0427	13.6458	12.1484	19.3968	13.8823	12.1465	13.5484	14.1866	12.4565	12.4089	12.2369	18.3545	12.5811	13.6445	12.8817	12.5516	12.7028	13.088	12.9678	12.2194
+	6.31281	1.45536	VEAGGGVGPFQAC[130.0791]GC[130.0791]R[54.0106]	sp|Q9NTG7|SIR3_HUMAN	13C(130.0791),15C(130.0791),16R(54.0106)	Q9NTG7	SIR3_HUMAN	SIRT3	NAD-dependent protein deacetylase sirtuin-3, mitochondrial	GO:0002791;GO:0002793;GO:0006091;GO:0006476;GO:0006807;GO:0008152;GO:0009060;GO:0009889;GO:0009891;GO:0009892;GO:0009893;GO:0009966;GO:0009968;GO:0009987;GO:0010556;GO:0010646;GO:0010647;GO:0010648;GO:0010817;GO:0015980;GO:0018193;GO:0018205;GO:0019216;GO:0019222;GO:0019538;GO:0023051;GO:0023056;GO:0023057;GO:0031323;GO:0031324;GO:0031325;GO:0031326;GO:0031328;GO:0032024;GO:0032879;GO:0032880;GO:…	GO:0000166;GO:0003676;GO:0003677;GO:0003824;GO:0004407;GO:0005488;GO:0005515;GO:0008270;GO:0016740;GO:0016787;GO:0016810;GO:0016811;GO:0017076;GO:0017136;GO:0019213;GO:0019899;GO:0030554;GO:0033558;GO:0034979;GO:0036094;GO:0043167;GO:0043168;GO:0043169;GO:0043565;GO:0046872;GO:0046914;GO:0051287;GO:0070403;GO:0097159;GO:0140096;GO:0140993;GO:1901265;GO:1901363	GO:0005634;GO:0005654;GO:0005739;GO:0005759;GO:0031974;GO:0032991;GO:0043226;GO:0043227;GO:0043229;GO:0043231;GO:0043233;GO:0070013;GO:0110165	22	37	13.3452	13.8092	14.4643	13.2224	17.68	13.4584	13.1844	12.9272	17.8866	12.1811	17.127	12.1304	13.5026	12.3007	17.4841	11.9369	12.301	12.4967	17.7564	13.8226	12.6842	12.2148	13.7377	17.1626	16.1553	12.4193	17.11	12.2526	16.7159	16.384	16.9017	13.4409	18.0691	13.3041	12.783
+	4.51278	1.45365	SVCGGFRAGSC[130.0791]GR[54.0106]	sp|P15241|K2M2_SHEEP	11C(130.0791),13R(54.0106)	P15241	K2M2_SHEEP		Keratin, type II microfibrillar, component 7C				52	64	12.7833	17.023	13.3562	12.1132	13.1094	13.1766	17.0733	16.0071	17.9578	12.3893	12.8971	14.8541	12.8066	13.2739	17.0748	12.4878	15.5021	11.3014	17.316	18.6597	12.6606	16.6073	16.8673	16.4239	12.1261	11.8116	13.5441	15.6188	13.0777	13.5239	16.0777	12.5586	18.2422	12.1703	17.1101
+	4.30809	1.453	SDPDPK[54.0106]APANKAFTGFIVEADTPGIQIGR[54.0106]	sp|P11310|ACADM_HUMAN	29R(54.0106),6K(54.0106)	P11310	ACADM_HUMAN	ACADM	Medium-chain specific acyl-CoA dehydrogenase, mitochondrial	GO:0000271;GO:0001889;GO:0005975;GO:0005976;GO:0005977;GO:0005978;GO:0006082;GO:0006091;GO:0006109;GO:0006111;GO:0006112;GO:0006575;GO:0006577;GO:0006578;GO:0006629;GO:0006631;GO:0006635;GO:0006807;GO:0006950;GO:0008152;GO:0009056;GO:0009058;GO:0009059;GO:0009062;GO:0009250;GO:0009266;GO:0009409;GO:0009437;GO:0009605;GO:0009628;GO:0009791;GO:0009889;GO:0009987;GO:0009991;GO:0010906;GO:0015980;GO:…	GO:0000166;GO:0003824;GO:0003995;GO:0005488;GO:0005515;GO:0016491;GO:0016627;GO:0036094;GO:0042802;GO:0043167;GO:0043168;GO:0050660;GO:0052890;GO:0070991;GO:0097159;GO:1901265;GO:1901363	GO:0005634;GO:0005737;GO:0005739;GO:0005759;GO:0016020;GO:0030424;GO:0031090;GO:0031966;GO:0031974;GO:0042995;GO:0043005;GO:0043226;GO:0043227;GO:0043229;GO:0043231;GO:0043233;GO:0070013;GO:0110165;GO:0120025	207	235	13.9426	17.9137	12.7514	12.7817	19.5724	18.7999	13.192	12.7765	13.3245	13.0818	13.2563	12.3668	13.3053	12.3568	18.3582	12.0024	12.3799	11.5726	13.4412	13.5629	12.1403	13.6475	13.3871	12.3419	11.5673	11.9893	13.7509	12.7331	12.7814	11.9935	13.3525	11.8481	12.3368	13.0564	13.1204
+	9.29698	1.45265	HKDTEYK[54.0106]KTDIC[130.0791]IPQTK	sp|O14967|CLGN_HUMAN	12C(130.0791),7K(54.0106)	O14967	CLGN_HUMAN	CLGN	Calmegin	GO:0006457;GO:0006508;GO:0006511;GO:0006807;GO:0006950;GO:0007338;GO:0007339;GO:0008037;GO:0008152;GO:0009056;GO:0009057;GO:0009566;GO:0009987;GO:0009988;GO:0010033;GO:0010243;GO:0010498;GO:0016043;GO:0019538;GO:0019941;GO:0022414;GO:0022607;GO:0030163;GO:0030433;GO:0033554;GO:0034976;GO:0035036;GO:0036503;GO:0042221;GO:0043161;GO:0043170;GO:0043632;GO:0043933;GO:0044238;GO:0050896;GO:0051603;GO:…	GO:0005488;GO:0005509;GO:0005515;GO:0043167;GO:0043169;GO:0044183;GO:0046872;GO:0051082	GO:0005783;GO:0005789;GO:0016020;GO:0031090;GO:0043226;GO:0043227;GO:0043229;GO:0043231;GO:0110165	500	516	12.878	14.4883	13.6307	13.739	13.812	12.7082	14.4662	11.5816	14.1793	11.4729	13.0178	12.9168	13.8644	13.3011	16.499	12.6587	12.359	12.181	16.5228	13.7036	11.9186	13.8733	13.0255	12.0845	12.038	12.1992	13.4221	13.7153	16.3189	13.1717	14.0641	13.2293	12.4923	13.0341	12.9015
+	2.98696	1.45224	IHGLTETIER[54.0106]	sp|Q86X02|CDR2L_HUMAN	10R(54.0106)	Q86X02	CDR2L_HUMAN	CDR2L	Cerebellar degeneration-related protein 2-like	GO:0006810;GO:0007017;GO:0007018;GO:0009987;GO:0010970;GO:0030705;GO:0046907;GO:0047496;GO:0051179;GO:0051234;GO:0051640;GO:0051641;GO:0051648;GO:0051649;GO:0051650;GO:0051656;GO:0055107;GO:0072384;GO:0099111;GO:0099518	GO:0005488;GO:0005515;GO:0042802	GO:0005737;GO:0110165	112	121	20.047	13.3227	19.7897	13.0034	12.9424	20.3913	18.4868	12.2585	13.3829	19.1481	13.5136	13.2661	12.7268	12.5242	20.585	11.9773	12.9271	11.9369	20.2867	20.6417	11.5399	13.1631	13.4805	12.3168	12.259	11.6887	19.6635	13.5164	14.3734	13.2354	12.2692	12.4693	12.7371	11.9226	11.7354
+	7.0392	1.44836	LLSHC[125.0477]LLVTLAAHLPAEFTPAVHASLDK[54.0106]FLASVSTVLTSK	sp|P69905|HBA_HUMAN	28K(54.0106),5C(125.0477)	P69905	HBA_HUMAN	HBA2	Hemoglobin subunit alpha	GO:0000302;GO:0006810;GO:0006950;GO:0006979;GO:0008152;GO:0009056;GO:0009987;GO:0010033;GO:0010035;GO:0015669;GO:0015670;GO:0015671;GO:0019755;GO:0030185;GO:0042221;GO:0042542;GO:0042743;GO:0042744;GO:0044237;GO:0044248;GO:0050896;GO:0051179;GO:0051234;GO:0071702;GO:0071704;GO:0071705;GO:0072593;GO:0098754;GO:0098869;GO:1901575;GO:1901700;GO:1990748	GO:0005344;GO:0005488;GO:0005506;GO:0019825;GO:0020037;GO:0036094;GO:0043167;GO:0043169;GO:0043177;GO:0046872;GO:0046906;GO:0046914;GO:0097159;GO:0140104	GO:0005576;GO:0005615;GO:0005829;GO:0005833;GO:0016020;GO:0031838;GO:0031974;GO:0031982;GO:0032991;GO:0043226;GO:0043227;GO:0043230;GO:0043233;GO:0065010;GO:0070013;GO:0070062;GO:0071682;GO:0072562;GO:0110165;GO:1903561	101	140	13.4201	14.7835	12.0497	15.4826	16.2453	15.8044	16.5073	15.6486	16.6085	15.2286	15.3373	11.752	12.5324	12.8671	16.0197	11.9915	13.2007	12.8379	15.9549	16.1785	15.0627	13.9198	12.6349	13.6582	12.4906	11.8306	16.5	14.0224	15.7559	11.6571	12.443	12.9858	16.0715	13.0178	15.843
+	1.6792	1.44795	NGIFPAAAGSR[54.0106]	sp|Q8N6S5|AR6P6_HUMAN	11R(54.0106)	Q8N6S5	AR6P6_HUMAN	ARL6IP6	ADP-ribosylation factor-like protein 6-interacting protein 6			GO:0005637;GO:0016020;GO:0019866;GO:0031090;GO:0031965;GO:0110165	88	98	22.2187	22.5754	13.6455	13.2027	23.9215	12.9126	23.2844	12.8614	23.8462	13.4112	22.959	12.784	14.1297	13.2251	13.711	12.3449	12.8721	12.4256	13.1614	24.5584	12.3606	12.8688	13.4419	11.9557	13.578	12.7337	21.4662	13.2751	12.5265	12.134	14.0071	12.2367	13.4505	11.7398	13.245
+	5.01753	1.44663	DLSAR[54.0106]FSEASHK[54.0106]HK[54.0106]	sp|Q03001|DYST_HUMAN	12K(54.0106),14K(54.0106),5R(54.0106)	Q03001	DYST_HUMAN	DST	Dystonin	GO:0000226;GO:0006810;GO:0006950;GO:0006996;GO:0007010;GO:0007017;GO:0007018;GO:0007044;GO:0007155;GO:0007163;GO:0007165;GO:0007166;GO:0007229;GO:0008088;GO:0008090;GO:0009611;GO:0009987;GO:0010970;GO:0016043;GO:0022607;GO:0030011;GO:0030705;GO:0031581;GO:0034329;GO:0034330;GO:0042060;GO:0045103;GO:0045104;GO:0046907;GO:0048870;GO:0050789;GO:0050794;GO:0050896;GO:0051179;GO:0051234;GO:0051641;GO:…	GO:0003779;GO:0005102;GO:0005178;GO:0005198;GO:0005488;GO:0005509;GO:0005515;GO:0008017;GO:0008092;GO:0015631;GO:0042802;GO:0042803;GO:0043167;GO:0043169;GO:0044877;GO:0046872;GO:0046983;GO:0050839;GO:0051010	GO:0005604;GO:0005634;GO:0005635;GO:0005654;GO:0005737;GO:0005789;GO:0005829;GO:0005856;GO:0005882;GO:0005925;GO:0005938;GO:0009925;GO:0015629;GO:0015630;GO:0016020;GO:0030018;GO:0030054;GO:0030055;GO:0030056;GO:0030312;GO:0030424;GO:0031012;GO:0031090;GO:0031252;GO:0031410;GO:0031673;GO:0031967;GO:0031975;GO:0031982;GO:0032838;GO:0035371;GO:0042995;GO:0043005;GO:0043226;GO:0043227;GO:0043228;GO:…	4242	4255	13.0233	15.4053	13.3838	13.1688	14.2915	12.9191	13.4702	11.9562	14.4577	13.2782	14.081	13.1596	12.3811	12.5832	13.1205	12.6893	12.9991	13.0711	12.6467	14.3566	12.189	11.8563	13.2827	13.1257	16.9966	11.7157	12.6595	12.2893	12.7854	13.09	12.5762	12.2668	12.2044	12.249	12.8047
+	5.15808	1.44177	EVQPLVNEAK[54.0106]	sp|Q8NCM8|DYHC2_HUMAN	10K(54.0106)	Q8NCM8	DYHC2_HUMAN	DYNC2H1	Cytoplasmic dynein 2 heavy chain 1	GO:0001568;GO:0001822;GO:0003002;GO:0003341;GO:0006508;GO:0006807;GO:0006810;GO:0006996;GO:0007017;GO:0007018;GO:0007030;GO:0007368;GO:0007389;GO:0008104;GO:0008152;GO:0008589;GO:0009653;GO:0009799;GO:0009855;GO:0009953;GO:0009966;GO:0009967;GO:0009987;GO:0010646;GO:0010647;GO:0010970;GO:0016043;GO:0016485;GO:0019538;GO:0021515;GO:0021522;GO:0021953;GO:0022607;GO:0023051;GO:0023056;GO:0030030;GO:…	GO:0000166;GO:0003774;GO:0003777;GO:0003824;GO:0005488;GO:0005515;GO:0005524;GO:0008569;GO:0016462;GO:0016787;GO:0016817;GO:0016818;GO:0016887;GO:0017076;GO:0017111;GO:0030554;GO:0032553;GO:0032555;GO:0032559;GO:0035639;GO:0036094;GO:0043167;GO:0043168;GO:0045505;GO:0051959;GO:0097159;GO:0097367;GO:0140657;GO:1901265;GO:1901363	GO:0005794;GO:0005868;GO:0005874;GO:0005875;GO:0005886;GO:0005929;GO:0005930;GO:0016020;GO:0030286;GO:0031514;GO:0031982;GO:0032991;GO:0042995;GO:0043226;GO:0043227;GO:0043229;GO:0043230;GO:0043231;GO:0045177;GO:0065010;GO:0070062;GO:0097542;GO:0097729;GO:0099080;GO:0099081;GO:0099512;GO:0099513;GO:0110165;GO:0120025;GO:1902494;GO:1903561	2980	2989	12.1783	19.6804	13.0894	12.7186	19.5282	13.0307	12.6545	12.4477	19.6192	13.1542	20.4601	13.6682	12.5108	12.8662	18.5045	13.1008	11.877	12.5994	20.2924	13.7119	13.1831	13.2717	13.7155	12.1239	16.6411	12.491	17.1076	12.9177	16.8695	11.0902	13.1196	12.2129	17.3152	12.4774	12.7957
+	7.98562	1.44027	AKADAEC[125.0477]YTAMKIAEANK[54.0106]	sp|O94905|ERLN2_HUMAN	18K(54.0106),7C(125.0477)	O94905	ERLN2_HUMAN	ERLIN2	Erlin-2	GO:0006066;GO:0006508;GO:0006511;GO:0006629;GO:0006807;GO:0006950;GO:0006984;GO:0006991;GO:0007165;GO:0008152;GO:0008202;GO:0008203;GO:0009056;GO:0009057;GO:0009889;GO:0009890;GO:0009892;GO:0009987;GO:0010033;GO:0010243;GO:0010498;GO:0010565;GO:0010894;GO:0016125;GO:0019216;GO:0019217;GO:0019218;GO:0019222;GO:0019538;GO:0019941;GO:0030163;GO:0030433;GO:0031323;GO:0031324;GO:0031326;GO:0031327;GO:…	GO:0005488;GO:0005496;GO:0005515;GO:0008289;GO:0015485;GO:0019899;GO:0031625;GO:0032934;GO:0036094;GO:0043178;GO:0044389;GO:0097159	GO:0005783;GO:0005789;GO:0005829;GO:0005886;GO:0016020;GO:0031090;GO:0032991;GO:0043226;GO:0043227;GO:0043229;GO:0043231;GO:0045121;GO:0098857;GO:0110165	256	273	13.2699	13.9809	13.2556	12.1799	12.986	13.3321	12.5362	12.5719	13.4095	13.0405	12.6404	13.4654	12.013	13.0117	16.9715	12.2522	13.3922	12.4795	17.1587	14.179	12.4948	13.8499	13.0174	13.63	12.9864	13.1266	12.8988	13.6611	17.0816	13.5123	13.131	12.7087	12.9951	12.3984	14.1734
+	7.35108	1.43649	SAK[54.0106]KPAVQK	sp|Q13459|MYO9B_HUMAN	3K(54.0106)	Q13459	MYO9B_HUMAN	MYO9B	Unconventional myosin-IXb	GO:0007165;GO:0007166;GO:0007264;GO:0007265;GO:0007266;GO:0009653;GO:0009966;GO:0009987;GO:0010646;GO:0016043;GO:0023051;GO:0030029;GO:0030030;GO:0030048;GO:0032502;GO:0032989;GO:0035023;GO:0035385;GO:0035556;GO:0046578;GO:0048583;GO:0048858;GO:0050789;GO:0050794;GO:0051056;GO:0065007;GO:0071840;GO:0072673;GO:0097581;GO:0120036;GO:0120039;GO:1902531	GO:0000146;GO:0000166;GO:0003774;GO:0003779;GO:0003824;GO:0005096;GO:0005102;GO:0005488;GO:0005515;GO:0005516;GO:0005524;GO:0008047;GO:0008092;GO:0016462;GO:0016787;GO:0016817;GO:0016818;GO:0016887;GO:0017076;GO:0017111;GO:0019899;GO:0030234;GO:0030554;GO:0030695;GO:0031267;GO:0032553;GO:0032555;GO:0032559;GO:0035639;GO:0036094;GO:0043167;GO:0043168;GO:0043169;GO:0043531;GO:0044877;GO:0046872;GO:…	GO:0001726;GO:0005737;GO:0005829;GO:0005856;GO:0005884;GO:0005938;GO:0015629;GO:0016020;GO:0016459;GO:0030027;GO:0032991;GO:0042995;GO:0043226;GO:0043228;GO:0043229;GO:0043232;GO:0048471;GO:0099080;GO:0099081;GO:0099512;GO:0099513;GO:0110165;GO:0120025	1382	1390	14.1911	15.5316	13.3363	13.7235	13.1194	12.7511	15.9293	12.0193	13.7302	13.0931	14.3406	12.7207	12.9055	12.6747	13.1146	12.4407	14.8847	12.5459	12.6173	15.1983	13.2375	13.284	16.2146	15.5771	13.3337	10.991	13.7043	16.3729	15.4087	15.2557	15.7716	12.766	17.0816	13.4021	17.1957
+	6.89741	1.4349	AIVNVIGM[15.9949]HK[54.0106]MTPPIK[54.0106]	sp|O75533|SF3B1_HUMAN	10K(54.0106),16K(54.0106),8M(15.9949)	O75533	SF3B1_HUMAN	SF3B1	Splicing factor 3B subunit 1	GO:0000245;GO:0000375;GO:0000377;GO:0000398;GO:0006139;GO:0006325;GO:0006338;GO:0006355;GO:0006356;GO:0006357;GO:0006359;GO:0006396;GO:0006397;GO:0006725;GO:0006807;GO:0008152;GO:0008380;GO:0009889;GO:0009891;GO:0009893;GO:0009987;GO:0010468;GO:0010556;GO:0010557;GO:0010604;GO:0016043;GO:0016070;GO:0016071;GO:0019219;GO:0019222;GO:0022607;GO:0022618;GO:0031056;GO:0031323;GO:0031325;GO:0031326;GO:…	GO:0003676;GO:0003723;GO:0003729;GO:0005488;GO:0005515;GO:0097159;GO:1990935	GO:0005634;GO:0005654;GO:0005681;GO:0005684;GO:0005686;GO:0005689;GO:0005730;GO:0016604;GO:0016607;GO:0030532;GO:0032991;GO:0034693;GO:0043226;GO:0043227;GO:0043228;GO:0043229;GO:0043231;GO:0043232;GO:0070603;GO:0071004;GO:0071005;GO:0071010;GO:0071011;GO:0071013;GO:0097525;GO:0110016;GO:0110165;GO:0120114;GO:0140513;GO:1902494;GO:1904949;GO:1990904	999	1014	13.0403	13.1719	14.8288	13.2098	17.3232	12.9971	16.6064	14.7924	16.6881	15.3749	14.6017	13.1645	12.7396	12.3538	16.0797	11.4866	13.2712	11.4871	16.4033	18.1311	11.7957	14.0896	13.8647	15.7501	15.094	11.6976	15.5939	12.261	14.4711	14.3431	13.5308	12.4174	17.7182	12.6785	13.0993
+	4.85578	1.43206	R[54.0106]MSDHRPAM[15.9949]GYHGQGPSDHYR	sp|O14647|CHD2_HUMAN	1R(54.0106),9M(15.9949)	O14647	CHD2_HUMAN	CHD2	Chromodomain-helicase-DNA-binding protein 2	GO:0002244;GO:0006325;GO:0006338;GO:0006355;GO:0006357;GO:0006950;GO:0006974;GO:0007517;GO:0008152;GO:0009058;GO:0009059;GO:0009889;GO:0009987;GO:0010467;GO:0010468;GO:0010556;GO:0016043;GO:0019219;GO:0019222;GO:0030154;GO:0031323;GO:0031326;GO:0032502;GO:0033554;GO:0034728;GO:0043170;GO:0043933;GO:0044237;GO:0044249;GO:0048513;GO:0048856;GO:0048863;GO:0048869;GO:0050789;GO:0050794;GO:0050896;GO:…	GO:0000166;GO:0000976;GO:0000977;GO:0000978;GO:0000987;GO:0001067;GO:0003676;GO:0003677;GO:0003682;GO:0003690;GO:0003723;GO:0003824;GO:0004386;GO:0005488;GO:0005515;GO:0005524;GO:0008094;GO:0016462;GO:0016787;GO:0016817;GO:0016818;GO:0016887;GO:0017076;GO:0017111;GO:0030554;GO:0032553;GO:0032555;GO:0032559;GO:0035639;GO:0036094;GO:0042393;GO:0043167;GO:0043168;GO:0043565;GO:0044877;GO:0097159;GO:…	GO:0000785;GO:0005634;GO:0032991;GO:0032993;GO:0043226;GO:0043227;GO:0043229;GO:0043231;GO:0110165	1743	1763	12.6282	11.9058	11.6676	13.2528	11.7955	14.5491	12.1947	13.3605	13.1327	13.2336	13.968	12.7912	12.9755	12.36	12.2431	11.9868	12.8947	11.114	11.9566	13.7868	11.5729	13.7557	13.3828	13.2582	17.6535	11.5487	12.8155	13.3564	12.3256	12.4082	12.0827	11.9174	13.6584	12.7995	13.7591
+	5.0343	1.42638	LVTSTR[54.0106]AHAK[54.0106]	sp|P47989|XDH_HUMAN	10K(54.0106),6R(54.0106)	P47989	XDH_HUMAN	XDH	Xanthine dehydrogenase/oxidase	GO:0000255;GO:0001932;GO:0001933;GO:0001936;GO:0001937;GO:0006139;GO:0006144;GO:0006145;GO:0006147;GO:0006148;GO:0006149;GO:0006152;GO:0006154;GO:0006157;GO:0006161;GO:0006163;GO:0006195;GO:0006196;GO:0006204;GO:0006725;GO:0006753;GO:0006790;GO:0006793;GO:0006796;GO:0006807;GO:0006810;GO:0006919;GO:0007589;GO:0007595;GO:0008152;GO:0008285;GO:0009056;GO:0009112;GO:0009114;GO:0009115;GO:0009116;GO:…	GO:0000166;GO:0003824;GO:0004854;GO:0004855;GO:0005488;GO:0005506;GO:0005515;GO:0016491;GO:0016725;GO:0016726;GO:0016727;GO:0036094;GO:0042802;GO:0042803;GO:0043167;GO:0043168;GO:0043169;GO:0043546;GO:0046872;GO:0046914;GO:0046983;GO:0050660;GO:0051536;GO:0051537;GO:0051540;GO:0070674;GO:0070675;GO:0071949;GO:0097159;GO:1901265;GO:1901363	GO:0005615;GO:0005777;GO:0005783;GO:0005829;GO:0016529;GO:0042579;GO:0043226;GO:0043227;GO:0043229;GO:0043231;GO:0110165	608	617	17.2888	15.9173	16.0037	13.5582	17.0768	12.8509	12.5223	12.2146	17.9466	13.1607	16.2405	19.4111	13.1059	12.399	16.0357	13.6512	12.8869	11.857	16.4907	13.6529	12.5336	13.7092	13.4259	12.6511	15.2849	13.3394	16.2759	19.7885	15.1095	12.3182	12.0053	12.161	16.6156	13.1535	12.774
+	5.3043	1.42593	IIMLTC[130.0791]AFLACK[54.0106]	sp|P51946|CCNH_HUMAN	12K(54.0106),6C(130.0791)	P51946	CCNH_HUMAN	CCNH	Cyclin-H	GO:0006139;GO:0006351;GO:0006352;GO:0006355;GO:0006357;GO:0006366;GO:0006367;GO:0006725;GO:0006807;GO:0007049;GO:0007346;GO:0008152;GO:0009058;GO:0009059;GO:0009889;GO:0009987;GO:0010468;GO:0010556;GO:0010564;GO:0016070;GO:0018130;GO:0019219;GO:0019222;GO:0019438;GO:0031323;GO:0031326;GO:0031647;GO:0032774;GO:0034641;GO:0034654;GO:0043170;GO:0044237;GO:0044238;GO:0044249;GO:0044271;GO:0046483;GO:…	GO:0016538;GO:0019207;GO:0019887;GO:0030234;GO:0098772	GO:0000307;GO:0000439;GO:0005634;GO:0005654;GO:0005667;GO:0005675;GO:0019907;GO:0019908;GO:0032806;GO:0032991;GO:0043226;GO:0043227;GO:0043229;GO:0043231;GO:0061695;GO:0070516;GO:0070985;GO:0090575;GO:0110165;GO:0140513;GO:0150005;GO:1902494;GO:1902554;GO:1902911;GO:1990234	103	114	12.6851	14.0696	13.3087	12.6804	14.0848	12.9197	12.9509	12.5615	13.0685	13.2763	12.5521	13.4318	13.3479	13.4987	13.8488	11.6588	12.6886	11.9907	12.6125	15.0764	10.869	12.6079	13.3583	13.2491	12.7279	12.6163	12.0151	12.9952	18.0633	11.9864	12.8725	12.7514	15.5039	12.5658	12.5511
+	3.11754	1.42526	LIVVVAGQPSEVR[54.0106]	sp|Q6ZNJ1|NBEL2_HUMAN	13R(54.0106)	Q6ZNJ1	NBEL2_HUMAN	NBEAL2	Neurobeachin-like protein 2	GO:0008104;GO:0009987;GO:0030099;GO:0030154;GO:0030220;GO:0032502;GO:0033036;GO:0048646;GO:0048869;GO:0051179;GO:0051641;GO:0070727	GO:0005488;GO:0005515;GO:0019899;GO:0019900;GO:0019901	GO:0005783;GO:0005829;GO:0005886;GO:0012506;GO:0016020;GO:0030659;GO:0030667;GO:0031090;GO:0043226;GO:0043227;GO:0043229;GO:0043231;GO:0070821;GO:0098588;GO:0101003;GO:0110165	2711	2723	14.6709	16.7209	15.0628	17.9004	20.8574	18.6824	20.0086	10.2345	20.7272	18.0342	17.4689	19.9636	18.641	15.58	17.3447	15.7713	16.7137	18.7398	20.6829	16.3371	12.7668	15.4919	17.5559	15.752	20.3678	15.5055	22.2106	17.3419	16.131	16.2131	15.6881	16.6523	15.0385	16.5725	20.0113
+	3.377	1.41954	LDETPDGR[54.0106]	sp|Q9HCL2|GPAT1_HUMAN	8R(54.0106)	Q9HCL2	GPAT1_HUMAN	GPAM	Glycerol-3-phosphate acyltransferase 1, mitochondrial	GO:0001775;GO:0001817;GO:0002376;GO:0002682;GO:0002683;GO:0002684;GO:0002694;GO:0002696;GO:0006072;GO:0006082;GO:0006139;GO:0006163;GO:0006629;GO:0006631;GO:0006637;GO:0006638;GO:0006639;GO:0006641;GO:0006644;GO:0006650;GO:0006651;GO:0006654;GO:0006655;GO:0006725;GO:0006753;GO:0006790;GO:0006793;GO:0006796;GO:0006807;GO:0006915;GO:0006924;GO:0006950;GO:0006952;GO:0008152;GO:0008219;GO:0008283;GO:…	GO:0003824;GO:0004366;GO:0008374;GO:0016740;GO:0016746;GO:0016747;GO:0102420	GO:0005741;GO:0005886;GO:0016020;GO:0019867;GO:0031090;GO:0031966;GO:0031968;GO:0098588;GO:0110165	280	287	13.101	12.8211	12.3431	13.2174	11.9832	13.941	13.3441	12.7504	13.4856	13.3973	12.5941	13.2721	13.1193	13.345	13.5758	12.6882	12.3173	11.2029	13.0143	14.8553	12.8688	13.721	12.4252	12.3042	18.5859	12.5578	12.6175	12.9526	12.9836	14.051	12.7793	12.1013	13.3177	12.673	13.128
+	7.45924	1.41837	LLGNVLVC[130.0791]VLARNFGK[54.0106]EFTPQM[15.9949]QAAYQKVVAGVANALAHK	sp|P02042|HBD_HUMAN	16K(54.0106),22M(15.9949),8C(130.0791)	P02042	HBD_HUMAN	HBD	Hemoglobin subunit delta	GO:0006810;GO:0008152;GO:0009056;GO:0009987;GO:0015669;GO:0015670;GO:0015671;GO:0019755;GO:0042743;GO:0042744;GO:0044237;GO:0044248;GO:0051179;GO:0051234;GO:0071702;GO:0071704;GO:0072593;GO:0098754;GO:0098869;GO:1901575;GO:1990748	GO:0005344;GO:0005488;GO:0005515;GO:0019825;GO:0020037;GO:0030492;GO:0031721;GO:0036094;GO:0043167;GO:0043169;GO:0043177;GO:0046872;GO:0046906;GO:0097159;GO:0140104	GO:0005829;GO:0005833;GO:0031838;GO:0032991;GO:0072562;GO:0110165	106	145	12.4129	12.9345	15.1545	12.8486	16.9525	15.8201	15.4838	14.6357	17.3316	12.9986	16.4135	12.506	12.9931	12.6613	15.9813	12.0293	13.0165	12.2281	17.2678	13.882	15.9528	15.2469	14.6523	12.064	15.1003	11.3719	13.8192	12.6958	12.3265	15.1963	16.4945	12.7929	12.0686	11.9203	13.1125
+	9.08604	1.41734	RVGLSGAPADAC[130.0791]STAQK[54.0106]AVGYIC[125.0477]K	sp|Q8NFW8|NEUA_HUMAN	12C(130.0791),17K(54.0106),23C(125.0477)	Q8NFW8	NEUA_HUMAN	CMAS	N-acylneuraminate cytidylyltransferase	GO:0006040;GO:0006054;GO:0006082;GO:0006807;GO:0008152;GO:0009987;GO:0019752;GO:0043436;GO:0043603;GO:0044237;GO:0044281;GO:0071704;GO:1901135;GO:1901564	GO:0003824;GO:0008781;GO:0016740;GO:0016772;GO:0016779;GO:0070567	GO:0005634;GO:0005654;GO:0016020;GO:0043226;GO:0043227;GO:0043229;GO:0043231;GO:0110165	383	406	12.661	13.9326	16.2184	13.346	13.6008	13.8121	13.6802	11.8174	13.577	13.3705	14.623	13.6028	13.0839	13.2119	13.9061	12.5667	13.211	11.3842	12.9388	13.4142	11.3978	13.4074	12.3556	13.1626	16.3562	12.1452	12.3738	13.0604	16.4976	13.6378	14.009	12.4819	13.2822	13.1368	13.0317
+	3.25452	1.41434	K[54.0106]SGVVLHR[54.0106]AVPKDK[54.0106]	sp|P07332|FES_HUMAN	14K(54.0106),1K(54.0106),8R(54.0106)	P07332	FES_HUMAN	FES	Tyrosine-protein kinase Fes/Fps	GO:0000226;GO:0001578;GO:0002682;GO:0002684;GO:0002697;GO:0002703;GO:0002761;GO:0002763;GO:0002886;GO:0006468;GO:0006793;GO:0006796;GO:0006807;GO:0006935;GO:0006996;GO:0007010;GO:0007017;GO:0007098;GO:0007154;GO:0007155;GO:0007584;GO:0008152;GO:0008283;GO:0008360;GO:0009605;GO:0009987;GO:0009991;GO:0010033;GO:0010638;GO:0010720;GO:0010975;GO:0010976;GO:0014070;GO:0014855;GO:0016043;GO:0016310;GO:…	GO:0000166;GO:0003824;GO:0004672;GO:0004713;GO:0004715;GO:0005102;GO:0005488;GO:0005515;GO:0005524;GO:0005543;GO:0008017;GO:0008092;GO:0008289;GO:0015631;GO:0016301;GO:0016740;GO:0016772;GO:0016773;GO:0017076;GO:0030554;GO:0032553;GO:0032555;GO:0032559;GO:0034987;GO:0035091;GO:0035639;GO:0036094;GO:0043167;GO:0043168;GO:0097159;GO:0097367;GO:0140096;GO:1901265;GO:1901363	GO:0005737;GO:0005794;GO:0005829;GO:0005856;GO:0005925;GO:0009898;GO:0015630;GO:0030054;GO:0030055;GO:0031410;GO:0031982;GO:0043226;GO:0043227;GO:0043228;GO:0043229;GO:0043231;GO:0043232;GO:0070161;GO:0097708;GO:0098552;GO:0098562;GO:0110165	540	553	20.7128	21.0172	20.1344	15.5538	20.6511	18.7165	20.937	20.5799	20.7399	19.5681	21.5415	20.1688	20.0576	17.8436	21.9156	16.3911	18.8589	16.0345	17.8663	21.0126	18.8216	20.7303	18.5681	18.8733	17.5579	13.8158	17.424	15.4716	18.7353	17.5416	16.4749	16.703	21.066	19.903	18.0647
+	6.71753	1.41274	K[54.0106]QEVPEEK	sp|Q9Y4D8|HECD4_HUMAN	1K(54.0106)	Q9Y4D8	HECD4_HUMAN	HECTD4	Probable E3 ubiquitin-protein ligase HECTD4	GO:0005975;GO:0005996;GO:0006006;GO:0006807;GO:0008152;GO:0016567;GO:0019318;GO:0019538;GO:0032446;GO:0033500;GO:0036211;GO:0042592;GO:0042593;GO:0043170;GO:0043412;GO:0043687;GO:0044238;GO:0044281;GO:0048878;GO:0070647;GO:0071704;GO:1901564	GO:0003824;GO:0004842;GO:0016740;GO:0016746;GO:0016755;GO:0019787;GO:0140096	GO:0016020;GO:0110165	3399	3406	18.4602	19.6484	18.7021	18.857	20.7146	19.1568	19.7654	19.2546	20.7707	18.6427	19.7889	18.1044	17.8674	16.2153	20.2351	17.9707	19.0052	16.9999	20.5361	21.9807	18.9652	15.9879	19.649	19.8073	19.4396	16.0536	20.4027	19.2011	19.8951	19.5256	19.2819	17.3735	20.3266	17.7043	18.4264
+	3.65149	1.41122	C[130.0791]LNNLAASQLK[54.0106]LDHYR[54.0106]	sp|Q14318|FKBP8_HUMAN	11K(54.0106),16R(54.0106),1C(130.0791)	Q14318	FKBP8_HUMAN	FKBP8	Peptidyl-prolyl cis-trans isomerase FKBP8	GO:0001654;GO:0001708;GO:0001932;GO:0001933;GO:0003002;GO:0006457;GO:0006915;GO:0007165;GO:0007166;GO:0007167;GO:0007178;GO:0007224;GO:0007389;GO:0007423;GO:0008104;GO:0008219;GO:0009889;GO:0009892;GO:0009894;GO:0009953;GO:0009966;GO:0009967;GO:0009987;GO:0010468;GO:0010506;GO:0010556;GO:0010563;GO:0010605;GO:0010646;GO:0010647;GO:0010821;GO:0012501;GO:0019220;GO:0019222;GO:0021904;GO:0023051;GO:…	GO:0003755;GO:0003824;GO:0005488;GO:0005515;GO:0005516;GO:0016853;GO:0016859;GO:0019904;GO:0042802;GO:0043167;GO:0043169;GO:0044183;GO:0046872;GO:0097718;GO:0140096	GO:0005739;GO:0005740;GO:0005783;GO:0005789;GO:0005829;GO:0012505;GO:0016020;GO:0031090;GO:0031966;GO:0031967;GO:0031975;GO:0032991;GO:0043226;GO:0043227;GO:0043229;GO:0043231;GO:0110165	274	289	12.3289	13.3279	12.716	12.5469	14.3981	12.6223	13.9637	13.2927	13.5702	13.042	13.3307	13.328	13.9949	13.0319	13.5692	11.7268	18.8323	12.744	13.1286	13.781	12.6105	14.2284	13.0714	18.6259	18.2363	12.168	13.2678	13.0026	19.4959	11.8768	19.3835	12.6966	12.4807	11.8393	12.5613
+	3.96842	1.40601	QPK[54.0106]EKIQAIIESC[130.0791]SR[54.0106]	sp|Q96MY1|NOL4L_HUMAN	13C(130.0791),15R(54.0106),3K(54.0106)	Q96MY1	NOL4L_HUMAN	NOL4L	Nucleolar protein 4-like			GO:0005654;GO:0005829;GO:0110165	211	225	13.9576	13.8714	15.5803	13.2537	14.3217	13.4222	13.4118	13.0143	13.2348	13.6386	13.9227	15.1995	13.4617	12.6003	13.4186	12.4451	15.1057	12.1343	15.1895	13.742	12.7741	14.4687	12.9399	17.7	16.2969	12.4078	16.6416	12.4073	16.4981	17.7106	15.2946	12.6041	13.1433	12.8609	15.3978
+	3.68259	1.40355	CNKRLR[54.0106]EK	sp|P16885|PLCG2_HUMAN	6R(54.0106)	P16885	PLCG2_HUMAN	PLCG2	1-phosphatidylinositol 4,5-bisphosphate phosphodiesterase gamma-2	GO:0001775;GO:0001817;GO:0001819;GO:0001878;GO:0001932;GO:0001934;GO:0002090;GO:0002092;GO:0002218;GO:0002220;GO:0002221;GO:0002223;GO:0002224;GO:0002252;GO:0002253;GO:0002263;GO:0002274;GO:0002281;GO:0002285;GO:0002312;GO:0002313;GO:0002316;GO:0002335;GO:0002366;GO:0002376;GO:0002429;GO:0002521;GO:0002682;GO:0002684;GO:0002697;GO:0002699;GO:0002700;GO:0002702;GO:0002703;GO:0002705;GO:0002718;GO:…	GO:0001784;GO:0003824;GO:0004435;GO:0004620;GO:0004629;GO:0005488;GO:0005515;GO:0008081;GO:0016298;GO:0016787;GO:0016788;GO:0019899;GO:0019900;GO:0019901;GO:0042578;GO:0045309;GO:0051219;GO:0097110;GO:0140030;GO:0140031;GO:1990782	GO:0005737;GO:0005829;GO:0005886;GO:0016020;GO:0031253;GO:0031256;GO:0031982;GO:0032587;GO:0043226;GO:0043227;GO:0043229;GO:0043230;GO:0043231;GO:0045121;GO:0048471;GO:0065010;GO:0070062;GO:0097708;GO:0098590;GO:0098857;GO:0110165;GO:1903561	1249	1256	19.7975	13.7444	19.7471	13.9077	12.9494	12.2195	13.7209	13.1782	13.3677	13.4002	13.6162	14.1603	12.7181	12.6212	13.7236	12.3951	12.3925	13.1852	13.2699	14.0368	12.2166	14.6885	13.4393	12.2104	12.439	11.3046	13.5544	13.1395	13.1107	12.8032	13.3719	12.6078	13.1929	12.6897	13.5103
+	4.02506	1.40305	PSQNNIGIQTM[15.9949]EC[130.0791]SLR[54.0106]	sp|Q12888|TP53B_HUMAN	11M(15.9949),13C(130.0791),16R(54.0106)	Q12888	TP53B_HUMAN	TP53BP1	TP53-binding protein 1	GO:0000018;GO:0000075;GO:0000077;GO:0002637;GO:0002639;GO:0002682;GO:0002684;GO:0002694;GO:0002696;GO:0002697;GO:0002699;GO:0002700;GO:0002702;GO:0002703;GO:0002705;GO:0002706;GO:0002708;GO:0002712;GO:0002714;GO:0002819;GO:0002821;GO:0002822;GO:0002824;GO:0002889;GO:0002891;GO:0006139;GO:0006259;GO:0006281;GO:0006282;GO:0006302;GO:0006303;GO:0006355;GO:0006357;GO:0006725;GO:0006807;GO:0006950;GO:…	GO:0002039;GO:0003676;GO:0003677;GO:0003684;GO:0003712;GO:0005488;GO:0005515;GO:0008134;GO:0035064;GO:0042162;GO:0042393;GO:0043565;GO:0061629;GO:0061649;GO:0097159;GO:0140030;GO:0140034;GO:0140035;GO:0140036;GO:0140110;GO:0140297	GO:0000776;GO:0000781;GO:0005634;GO:0005654;GO:0005657;GO:0005737;GO:0016604;GO:0032991;GO:0035861;GO:0043226;GO:0043227;GO:0043228;GO:0043229;GO:0043231;GO:0043232;GO:0090734;GO:0098687;GO:0099080;GO:0110165;GO:1902494;GO:1990391	1147	1162	18.0072	15.9664	18.242	12.3901	17.7413	12.4317	17.3355	12.4655	17.8346	12.5287	17.7421	13.1231	13.7987	13.0752	16.9568	13.0284	12.7045	10.7297	16.6355	13.9523	12.0599	13.3765	12.9207	14.67	18.1021	12.2916	15.564	13.3022	15.9008	17.5602	16.2818	11.7659	16.022	11.7771	12.4116
+	3.37879	1.40192	GK[54.0106]K[54.0106]DDNGIGTAIDFVLSNAR	sp|Q9NQG6|MID51_HUMAN	2K(54.0106),3K(54.0106)	Q9NQG6	MID51_HUMAN	MIEF1	Mitochondrial dynamics protein MID51	GO:0000266;GO:0001666;GO:0006950;GO:0006996;GO:0007005;GO:0009628;GO:0009987;GO:0010638;GO:0010821;GO:0010822;GO:0016043;GO:0022603;GO:0032879;GO:0032880;GO:0033043;GO:0033554;GO:0036293;GO:0036294;GO:0042221;GO:0048285;GO:0048518;GO:0048522;GO:0050789;GO:0050793;GO:0050794;GO:0050896;GO:0051094;GO:0051128;GO:0051130;GO:0051716;GO:0060341;GO:0065007;GO:0070201;GO:0070482;GO:0070887;GO:0071453;GO:…	GO:0000166;GO:0005488;GO:0005515;GO:0017076;GO:0019001;GO:0019003;GO:0030554;GO:0032553;GO:0032555;GO:0032559;GO:0032561;GO:0036094;GO:0042802;GO:0043167;GO:0043168;GO:0043531;GO:0097159;GO:0097367;GO:1901265;GO:1901363	GO:0005739;GO:0005741;GO:0016020;GO:0019867;GO:0031090;GO:0031966;GO:0031968;GO:0043226;GO:0043227;GO:0043229;GO:0043231;GO:0098588;GO:0110165	9	28	13.965	12.5092	13.2642	12.9735	12.765	12.5381	12.4213	11.9716	13.1823	13.5083	13.9091	12.6668	12.9791	13.0912	18.0828	13.364	13.3563	12.2575	18.6	13.1158	11.5656	13.561	19.6092	13.828	18.7543	13.0135	12.7186	13.0589	20.1722	19.8009	20.4127	12.8536	20.5635	12.3163	21.7793
+	6.67866	1.39765	VGK[54.0106]FQQAIDTWEEK	sp|Q96NG3|ODAD4_HUMAN	3K(54.0106)	Q96NG3	ODAD4_HUMAN	ODAD4	Outer dynein arm-docking complex subunit 4	GO:0003008;GO:0003016;GO:0003341;GO:0003351;GO:0006810;GO:0006858;GO:0007017;GO:0007018;GO:0007420;GO:0007507;GO:0008104;GO:0009987;GO:0016043;GO:0022607;GO:0030324;GO:0032501;GO:0032502;GO:0033036;GO:0033365;GO:0036158;GO:0043933;GO:0048513;GO:0048856;GO:0050877;GO:0051179;GO:0051234;GO:0051641;GO:0060287;GO:0061512;GO:0065003;GO:0070286;GO:0070727;GO:0071840;GO:0090660;GO:0099111;GO:0120197;GO:…		GO:0005576;GO:0005737;GO:0005929;GO:0005930;GO:0031514;GO:0032991;GO:0042995;GO:0043226;GO:0043227;GO:0097728;GO:0097729;GO:0110165;GO:0120025;GO:0120228	373	386	19.833	20.3598	19.8959	19.5082	21.3229	20.0485	20.8387	19.8361	21.2467	19.3746	19.1211	19.0302	17.9488	16.6965	19.5538	18.3304	19.2674	17.1845	20.9267	22.2373	20.5296	19.7019	20.3536	20.3775	19.7329	16.2763	20.3683	19.3945	20.4139	20.0147	20.0096	18.2799	21.3159	18.5145	20.2803
+	5.99762	1.39729	IFNHK[54.0106]TVVGSKK[54.0106]VNGK	sp|Q7Z7G0|TARSH_HUMAN	12K(54.0106),5K(54.0106)	Q7Z7G0	TARSH_HUMAN	ABI3BP	Target of Nesh-SH3	GO:0009987;GO:0010810;GO:0010811;GO:0016043;GO:0030155;GO:0030198;GO:0043062;GO:0045229;GO:0045785;GO:0048518;GO:0048522;GO:0050789;GO:0050794;GO:0065007;GO:0071840		GO:0005576;GO:0005615;GO:0030312;GO:0031012;GO:0062023;GO:0110165	206	221	12.6123	13.6724	14.0615	12.4971	12.4632	11.9177	14.8442	13.3695	13.2236	13.5108	13.7936	12.7995	13.4314	13.3976	15.558	11.8542	12.802	12.335	17.0108	14.4859	11.3758	13.8178	13.3979	12.2012	11.9705	12.1143	12.7942	12.2466	19.0914	12.7868	13.3341	11.5513	13.4668	12.4697	13.3552
+	5.63084	1.3952	VYNTLR[54.0106]HAVGTM[15.9949]YR	sp|Q9HC21|TPC_HUMAN	12M(15.9949),6R(54.0106)	Q9HC21	TPC_HUMAN	SLC25A19	Mitochondrial thiamine pyrophosphate carrier	GO:0006725;GO:0006766;GO:0006767;GO:0006790;GO:0006793;GO:0006796;GO:0006807;GO:0006810;GO:0006862;GO:0008152;GO:0009058;GO:0009110;GO:0009229;GO:0009987;GO:0015695;GO:0015697;GO:0015711;GO:0015748;GO:0015888;GO:0015931;GO:0018130;GO:0019438;GO:0019637;GO:0030302;GO:0030974;GO:0034641;GO:0035461;GO:0042357;GO:0042364;GO:0042723;GO:0042724;GO:0044237;GO:0044249;GO:0044271;GO:0044272;GO:0044281;GO:…	GO:0005215;GO:0008514;GO:0015101;GO:0015215;GO:0015234;GO:0015291;GO:0015297;GO:0015605;GO:0015651;GO:0015932;GO:0022804;GO:0022857;GO:0030233;GO:0090422;GO:0090482;GO:1901474;GO:1901682;GO:1901702	GO:0005634;GO:0005739;GO:0005743;GO:0016020;GO:0019866;GO:0031090;GO:0031966;GO:0043226;GO:0043227;GO:0043229;GO:0043231;GO:0110165	154	167	15.8614	16.7107	16.1149	12.4135	12.1433	13.3203	12.752	12.5848	13.9571	14.1761	16.9993	13.2764	13.3173	12.1323	14.3159	12.2806	14.2277	12.3542	12.7347	18.3455	18.1925	14.0582	16.847	12.206	12.1944	12.0118	12.6672	13.1207	13.3983	13.5975	14.8117	12.2266	18.581	11.5002	17.263
+	9.37047	1.39391	IHTTAEK[54.0106]	sp|A6NJ78|MET15_HUMAN	7K(54.0106)	A6NJ78	MET15_HUMAN	METTL15	12S rRNA N4-methylcytidine (m4C) methyltransferase	GO:0000154;GO:0001510;GO:0006139;GO:0006364;GO:0006396;GO:0006725;GO:0006807;GO:0008152;GO:0009451;GO:0009987;GO:0016070;GO:0016072;GO:0031167;GO:0032259;GO:0034470;GO:0034641;GO:0034660;GO:0043170;GO:0043412;GO:0043414;GO:0044237;GO:0044238;GO:0046483;GO:0070475;GO:0071704;GO:0090304;GO:1901360	GO:0003824;GO:0008168;GO:0008170;GO:0008173;GO:0008649;GO:0008757;GO:0016434;GO:0016740;GO:0016741;GO:0071424;GO:0140098;GO:0140102;GO:0140640	GO:0005739;GO:0005759;GO:0031974;GO:0043226;GO:0043227;GO:0043229;GO:0043231;GO:0043233;GO:0070013;GO:0110165	33	39	13.1593	12.9717	12.8859	13.745	15.8526	13.2245	13.7845	12.6508	16.3242	11.8244	15.6515	13.3199	13.5902	13.0295	15.5735	11.6544	14.3408	12.184	15.7972	17.0396	13.6713	13.9341	13.2293	15.2686	14.1344	12.9211	12.6016	13.0361	15.2631	13.03	15.3639	13.4841	15.4286	12.0962	15.9545
+	3.7049	1.39314	SAK[54.0106]GEEVDVAR	sp|O94760|DDAH1_HUMAN	3K(54.0106)	O94760	DDAH1_HUMAN	DDAH1	N(G),N(G)-dimethylarginine dimethylaminohydrolase 1	GO:0000052;GO:0003008;GO:0003013;GO:0003018;GO:0003073;GO:0006082;GO:0006520;GO:0006525;GO:0006527;GO:0006807;GO:0007165;GO:0007263;GO:0008152;GO:0008217;GO:0008285;GO:0009056;GO:0009063;GO:0009064;GO:0009065;GO:0009889;GO:0009891;GO:0009893;GO:0009987;GO:0016054;GO:0019222;GO:0019752;GO:0019932;GO:0022603;GO:0031323;GO:0031325;GO:0031326;GO:0031328;GO:0032501;GO:0035556;GO:0042127;GO:0043114;GO:…	GO:0003824;GO:0005488;GO:0016403;GO:0016597;GO:0016787;GO:0016810;GO:0016813;GO:0031406;GO:0036094;GO:0043167;GO:0043168;GO:0043169;GO:0043177;GO:0046872	GO:0005829;GO:0031982;GO:0043226;GO:0043227;GO:0043230;GO:0065010;GO:0070062;GO:0110165;GO:1903561	32	42	17.9789	14.5726	17.1925	12.5903	12.8639	18.0134	13.0426	13.0402	15.163	12.7329	13.4999	17.7159	12.7148	12.8496	13.5717	13.1069	12.4624	12.271	13.765	13.6395	12.8882	19.2256	12.6857	11.7766	18.7325	11.9469	12.661	12.2948	17.4853	13.4307	12.5818	13.4318	13.2427	12.9738	13.6775
+	5.7047	1.391	KASEPAGGPRR[54.0106]EDIVDTM[15.9949]VFK	sp|Q8WWM7|ATX2L_HUMAN	11R(54.0106),18M(15.9949)	Q8WWM7	ATX2L_HUMAN	ATXN2L	Ataxin-2-like protein	GO:0006139;GO:0006725;GO:0006807;GO:0006996;GO:0008152;GO:0009987;GO:0016043;GO:0016070;GO:0016071;GO:0022607;GO:0034063;GO:0034641;GO:0043170;GO:0044237;GO:0044238;GO:0046483;GO:0070925;GO:0071704;GO:0071840;GO:0090304;GO:0140694;GO:1901360	GO:0003676;GO:0003723;GO:0003729;GO:0005488;GO:0005515;GO:0045296;GO:0050839;GO:0097159	GO:0005829;GO:0010494;GO:0016020;GO:0016604;GO:0016607;GO:0035770;GO:0036464;GO:0043226;GO:0043228;GO:0043229;GO:0043232;GO:0099080;GO:0110165	166	186	13.104	12.9129	13.4586	13.2613	19.2003	13.2057	16.9558	12.5727	12.5017	12.6794	18.3444	13.9185	12.8998	11.9751	18.7169	12.0695	13.1187	12.8735	18.4018	18.9536	12.0369	11.9083	13.7258	11.4741	16.248	11.7925	17.8992	13.1198	16.6602	14.1608	12.9959	12.2747	18.491	12.2776	13.7084
+	12.0769	1.39075	KQELVTQNELLK[54.0106]	sp|Q15025|TNIP1_HUMAN	12K(54.0106)	Q15025	TNIP1_HUMAN	TNIP1	TNFAIP3-interacting protein 1	GO:0002218;GO:0002221;GO:0002224;GO:0002237;GO:0002253;GO:0002376;GO:0002682;GO:0002684;GO:0002755;GO:0002757;GO:0002758;GO:0002764;GO:0002831;GO:0002833;GO:0006355;GO:0006357;GO:0006412;GO:0006518;GO:0006807;GO:0006950;GO:0006952;GO:0006954;GO:0007155;GO:0007159;GO:0007165;GO:0008152;GO:0009058;GO:0009059;GO:0009100;GO:0009101;GO:0009605;GO:0009607;GO:0009889;GO:0009891;GO:0009893;GO:0009966;GO:…	GO:0005488;GO:0005515;GO:0019899;GO:0019900;GO:0019901;GO:0042802;GO:0051019	GO:0005654;GO:0005829;GO:0110165	452	463	15.0662	13.6747	14.8159	13.0257	14.8745	13.4645	14.6476	13.4049	16.1667	13.7145	15.3754	13.1983	12.3575	12.427	15.7117	12.947	12.9418	10.9037	15.0894	12.7613	12.7435	13.3221	13.996	12.2427	12.4593	12.1568	14.5066	13.1934	15.6086	13.2612	13.4388	12.7608	14.5421	12.3526	13.399
+	3.82475	1.3882	FYWM[15.9949]HSKLPEEEGLGEK[54.0106]	sp|O95149|SPN1_HUMAN	17K(54.0106),4M(15.9949)	O95149	SPN1_HUMAN	SNUPN	Snurportin-1	GO:0006404;GO:0006606;GO:0006810;GO:0006886;GO:0006913;GO:0008104;GO:0009987;GO:0015031;GO:0015931;GO:0033036;GO:0033365;GO:0034504;GO:0045184;GO:0046907;GO:0050657;GO:0050658;GO:0051030;GO:0051169;GO:0051170;GO:0051179;GO:0051234;GO:0051236;GO:0051641;GO:0051649;GO:0061015;GO:0070727;GO:0071702;GO:0071705;GO:0072594	GO:0000339;GO:0003676;GO:0003723;GO:0005488;GO:0061608;GO:0097159;GO:0140104;GO:0140142	GO:0005643;GO:0005654;GO:0005829;GO:0005886;GO:0016020;GO:0031074;GO:0032991;GO:0042564;GO:0110165;GO:0140513	205	221	13.804	14.0811	13.5231	12.3232	19.7676	13.6825	19.1037	12.9524	13.5984	13.6533	19.033	14.1509	12.7583	12.0815	19.1413	13.2658	12.4778	11.3728	19.3521	20.8477	12.7358	13.5714	13.5678	13.087	18.1601	12.3715	19.1979	11.931	18.8663	17.8353	11.8791	12.1851	19.7938	12.2132	12.4671
+	8.43867	1.38728	TNFDGLPR[54.0106]VKDER	sp|Q9BXM9|FSD1L_HUMAN	8R(54.0106)	Q9BXM9	FSD1L_HUMAN	FSD1L	FSD1-like protein				237	249	13.017	16.125	14.0065	12.8226	16.8698	14.7773	15.5379	13.246	16.5278	13.6392	15.4898	13.3874	14.2953	13.1905	16.4128	11.9697	14.5179	11.2258	16.583	18.4645	12.894	13.7365	16.3185	13.2078	15.441	12.4111	15.3483	12.3144	16.8905	15.6371	14.6292	12.4113	15.6584	11.6995	14.8863
+	5.69789	1.3867	PAQTTVLIKTAK[54.0106]	sp|Q9H967|WDR76_HUMAN	12K(54.0106)	Q9H967	WDR76_HUMAN	WDR76	WD repeat-containing protein 76	GO:0006950;GO:0006974;GO:0009966;GO:0009987;GO:0010564;GO:0010646;GO:0023051;GO:0033554;GO:0048583;GO:0050789;GO:0050794;GO:0050896;GO:0051716;GO:0051726;GO:0065007;GO:0080134;GO:0080135;GO:1901976;GO:1901987;GO:1902531;GO:2000001	GO:0003676;GO:0003677;GO:0005488;GO:0005515;GO:0019899;GO:0097159	GO:0000785;GO:0000792;GO:0005634;GO:0032991;GO:0032993;GO:0043226;GO:0043227;GO:0043229;GO:0043231;GO:0090734;GO:0110165	37	48	13.501	15.2164	12.3798	12.9969	13.373	12.4369	13.3343	11.9761	14.8793	12.5929	12.3775	13.6501	13.6001	12.9284	15.9279	13.5174	15.1098	11.7631	15.9128	14.6157	13.1781	12.9681	14.9559	11.7385	12.876	12.4478	13.5091	12.9637	15.7472	12.7069	12.234	13.4772	13.6163	11.524	14.802
+	5.09296	1.3856	HLIDGDVVLFNRQPSLHK[54.0106]	sp|O14802|RPC1_HUMAN	18K(54.0106)	O14802	RPC1_HUMAN	POLR3A	DNA-directed RNA polymerase III subunit RPC1	GO:0001817;GO:0001819;GO:0002376;GO:0006139;GO:0006351;GO:0006383;GO:0006725;GO:0006807;GO:0006950;GO:0006952;GO:0006955;GO:0008152;GO:0009058;GO:0009059;GO:0009605;GO:0009607;GO:0009615;GO:0009889;GO:0009891;GO:0009893;GO:0009987;GO:0010468;GO:0010556;GO:0010557;GO:0010604;GO:0010628;GO:0016070;GO:0018130;GO:0019222;GO:0019438;GO:0031323;GO:0031325;GO:0031326;GO:0031328;GO:0032479;GO:0032481;GO:…	GO:0003676;GO:0003677;GO:0003682;GO:0003824;GO:0003899;GO:0005488;GO:0016740;GO:0016772;GO:0016779;GO:0034062;GO:0043167;GO:0043169;GO:0044877;GO:0046872;GO:0097159;GO:0097747;GO:0140098;GO:0140640	GO:0000428;GO:0005634;GO:0005654;GO:0005666;GO:0005829;GO:0016020;GO:0030880;GO:0032991;GO:0043226;GO:0043227;GO:0043229;GO:0043231;GO:0055029;GO:0061695;GO:0110165;GO:0140513;GO:0140535;GO:1902494;GO:1990234	453	470	12.7612	13.4006	12.4258	13.4405	17.1823	12.8302	17.3304	14.2167	13.4309	12.4982	13.0985	12.8839	13.7646	12.057	18.2751	13.5178	13.0321	11.9449	17.0024	14.707	11.7465	13.8185	13.152	12.7247	12.2595	12.2531	16.5031	12.9098	13.3014	13.2061	12.7805	12.6331	13.3292	13.1122	12.9967
+	9.722	1.38134	AGGVMK[54.0106]IVREHYLR	sp|Q9Y2L1|RRP44_HUMAN	6K(54.0106)	Q9Y2L1	RRP44_HUMAN	DIS3	Exosome complex exonuclease RRP44	GO:0000291;GO:0000956;GO:0006139;GO:0006364;GO:0006396;GO:0006401;GO:0006402;GO:0006725;GO:0006807;GO:0008152;GO:0009056;GO:0009057;GO:0009889;GO:0009890;GO:0009892;GO:0009987;GO:0010468;GO:0010556;GO:0010558;GO:0010605;GO:0010629;GO:0016070;GO:0016071;GO:0016072;GO:0016075;GO:0019222;GO:0019439;GO:0031323;GO:0031324;GO:0031326;GO:0031327;GO:0034470;GO:0034641;GO:0034655;GO:0034660;GO:0034661;GO:…	GO:0000175;GO:0003676;GO:0003723;GO:0003824;GO:0004518;GO:0004519;GO:0004527;GO:0004532;GO:0004540;GO:0005085;GO:0005488;GO:0008408;GO:0016787;GO:0016788;GO:0016796;GO:0016896;GO:0030234;GO:0030695;GO:0060589;GO:0097159;GO:0098772;GO:0140098;GO:0140640	GO:0000176;GO:0000177;GO:0000178;GO:0005634;GO:0005654;GO:0005829;GO:0016020;GO:0032991;GO:0043226;GO:0043227;GO:0043229;GO:0043231;GO:0110165;GO:0140513;GO:1902494;GO:1905354	13	26	12.9495	12.9724	16.1643	12.5612	16.2482	12.6129	14.63	11.7156	17.5749	12.8256	15.8092	13.5292	13.8736	12.2718	16.0209	12.7385	14.8851	11.9662	15.3971	14.6066	12.648	12.3905	15.3563	13.4554	13.115	11.9659	13.0731	11.7332	14.7526	13.1049	12.6903	12.1239	12.5421	12.2331	16.5049
+	7.11164	1.38103	VYDRRM[15.9949]ALSEC[130.0791]R[54.0106]	sp|Q8N122|RPTOR_HUMAN	11C(130.0791),12R(54.0106),6M(15.9949)	Q8N122	RPTOR_HUMAN	RPTOR	Regulatory-associated protein of mTOR	GO:0001101;GO:0001558;GO:0001666;GO:0001932;GO:0001934;GO:0001936;GO:0001938;GO:0002682;GO:0002684;GO:0002761;GO:0002763;GO:0006109;GO:0006110;GO:0006140;GO:0006355;GO:0006359;GO:0006950;GO:0006970;GO:0006974;GO:0007154;GO:0007165;GO:0007346;GO:0007610;GO:0008284;GO:0008361;GO:0009267;GO:0009410;GO:0009605;GO:0009628;GO:0009719;GO:0009889;GO:0009891;GO:0009892;GO:0009893;GO:0009894;GO:0009895;GO:…	GO:0000182;GO:0000976;GO:0000987;GO:0000992;GO:0001002;GO:0001003;GO:0001006;GO:0001016;GO:0001025;GO:0001067;GO:0001156;GO:0003676;GO:0003677;GO:0003690;GO:0004857;GO:0004860;GO:0005488;GO:0005515;GO:0008047;GO:0008134;GO:0019207;GO:0019209;GO:0019210;GO:0019887;GO:0019899;GO:0019900;GO:0019901;GO:0030234;GO:0030291;GO:0030295;GO:0030674;GO:0031267;GO:0043565;GO:0044877;GO:0051020;GO:0060090;GO:…	GO:0000323;GO:0005654;GO:0005737;GO:0005764;GO:0005765;GO:0005773;GO:0005774;GO:0005829;GO:0010494;GO:0016020;GO:0030425;GO:0031090;GO:0031931;GO:0032991;GO:0035770;GO:0036464;GO:0038201;GO:0042995;GO:0043005;GO:0043025;GO:0043226;GO:0043227;GO:0043228;GO:0043229;GO:0043231;GO:0043232;GO:0044297;GO:0098588;GO:0098852;GO:0099080;GO:0110165;GO:0120025;GO:0140535	1192	1203	12.8795	14.0017	12.8876	12.8013	12.3294	13.348	13.3123	13.8839	13.4618	13.1604	13.7482	12.2842	12.4011	12.7823	12.0046	12.3093	12.4607	11.1486	13.1812	13.194	13.1453	13.014	15.3831	14.1067	13.1202	12.1316	13.0019	12.7479	12.0973	13.3537	15.44	12.2255	16.2904	12.4257	16.7165
+	7.82642	1.38092	HEIK[54.0106]LPVKWTAPEAIR[54.0106]	sp|P42685|FRK_HUMAN	16R(54.0106),4K(54.0106)	P42685	FRK_HUMAN	FRK	Tyrosine-protein kinase FRK	GO:0000122;GO:0002376;GO:0006355;GO:0006357;GO:0006793;GO:0006796;GO:0006950;GO:0006952;GO:0006955;GO:0007165;GO:0007166;GO:0007167;GO:0007169;GO:0008152;GO:0009605;GO:0009607;GO:0009889;GO:0009890;GO:0009892;GO:0009987;GO:0010468;GO:0010556;GO:0010558;GO:0010605;GO:0016310;GO:0019219;GO:0019222;GO:0030154;GO:0031323;GO:0031324;GO:0031326;GO:0031327;GO:0032502;GO:0043207;GO:0044237;GO:0044419;GO:…	GO:0000166;GO:0003824;GO:0004672;GO:0004713;GO:0004715;GO:0005102;GO:0005488;GO:0005515;GO:0005524;GO:0016301;GO:0016740;GO:0016772;GO:0016773;GO:0017076;GO:0030554;GO:0032553;GO:0032555;GO:0032559;GO:0035639;GO:0036094;GO:0043167;GO:0043168;GO:0097159;GO:0097367;GO:0140096;GO:1901265;GO:1901363	GO:0005576;GO:0005634;GO:0005654;GO:0005775;GO:0005829;GO:0019897;GO:0019898;GO:0031234;GO:0031974;GO:0031982;GO:0031983;GO:0034774;GO:0035578;GO:0035580;GO:0043226;GO:0043227;GO:0043229;GO:0043230;GO:0043231;GO:0043233;GO:0060205;GO:0065010;GO:0070013;GO:0070062;GO:0110165;GO:1903561	391	406	13.5865	14.2628	12.721	12.9673	13.684	12.5147	14.0532	11.9202	13.4089	13.6938	12.9453	12.3054	13.0178	12.8751	12.7957	13.1184	12.3446	12.3206	13.1224	13.6522	11.8798	13.6628	13.9663	12.9102	12.1859	12.7351	13.3123	12.5177	15.829	13.4936	13.2744	11.8129	16.856	12.0317	12.4487
+	3.72602	1.379	SLR[54.0106]EC[125.0477]QGAPVTASHFRFAR	sp|Q8IUL8|CILP2_HUMAN	3R(54.0106),5C(125.0477)	Q8IUL8	CILP2_HUMAN	CILP2	Cartilage intermediate layer protein 2			GO:0005615;GO:0031982;GO:0043226;GO:0043227;GO:0043230;GO:0065010;GO:0070062;GO:0110165;GO:1903561	883	901	19.6275	19.9311	19.4376	15.5217	20.9771	15.7316	20.2942	19.0222	20.5594	15.4717	19.6994	19.3965	18.1635	17.4177	20.1137	18.582	18.0628	18.0608	19.9322	21.5779	12.3402	19.5741	19.8425	19.9549	19.8212	17.4064	20.4614	19.3118	20.143	20.0689	18.4503	19.0931	21.1561	18.7623	19.791
+	7.93986	1.37708	SQPSMYEQLR[54.0106]DIAIDNIC[125.0477]R	sp|P42356|PI4KA_HUMAN	10R(54.0106),18C(125.0477)	P42356	PI4KA_HUMAN	PI4KA	Phosphatidylinositol 4-kinase alpha	GO:0006629;GO:0006644;GO:0006650;GO:0006661;GO:0006793;GO:0006796;GO:0007165;GO:0008152;GO:0008610;GO:0008654;GO:0009058;GO:0009987;GO:0016310;GO:0019637;GO:0035556;GO:0044237;GO:0044238;GO:0044249;GO:0044255;GO:0044403;GO:0044419;GO:0044788;GO:0045017;GO:0046474;GO:0046486;GO:0046488;GO:0046854;GO:0048015;GO:0050789;GO:0050794;GO:0051702;GO:0051851;GO:0065007;GO:0071704;GO:0090407;GO:0140754;GO:…	GO:0000166;GO:0001727;GO:0003824;GO:0004430;GO:0005488;GO:0005515;GO:0005524;GO:0016301;GO:0016740;GO:0016772;GO:0016773;GO:0017076;GO:0030554;GO:0032553;GO:0032555;GO:0032559;GO:0035639;GO:0036094;GO:0043167;GO:0043168;GO:0045296;GO:0050839;GO:0052742;GO:0097159;GO:0097367;GO:1901265;GO:1901363	GO:0005737;GO:0005829;GO:0005886;GO:0005925;GO:0012506;GO:0016020;GO:0030054;GO:0030055;GO:0030659;GO:0030660;GO:0031090;GO:0031982;GO:0043226;GO:0043227;GO:0043230;GO:0065010;GO:0070062;GO:0070161;GO:0098588;GO:0110165;GO:1903561	557	575	12.93	13.1381	12.4369	12.5282	12.6611	13.2089	13.0443	13.512	14.5658	13.2997	13.5795	12.5114	13.3744	11.938	12.1345	12.8881	12.1456	11.8168	12.7257	14.7343	11.3476	13.7412	13.8926	12.6959	13.265	11.3902	12.9138	12.3731	15.1864	12.9027	15.7824	13.3671	15.695	12.6084	13.4251
+	10.4786	1.37472	K[54.0106]TFSFVM[15.9949]PSLVEEIPLDK	sp|O43826|G6PT1_HUMAN	1K(54.0106),7M(15.9949)	O43826	G6PT1_HUMAN	SLC37A4	Glucose-6-phosphate exchanger SLC37A4	GO:0005975;GO:0005996;GO:0006006;GO:0006094;GO:0006810;GO:0006817;GO:0008152;GO:0008643;GO:0009058;GO:0009987;GO:0015698;GO:0015712;GO:0015748;GO:0015760;GO:0016051;GO:0019318;GO:0019319;GO:0033500;GO:0035435;GO:0042592;GO:0042593;GO:0044238;GO:0044281;GO:0044283;GO:0046364;GO:0048878;GO:0051179;GO:0051234;GO:0055085;GO:0071702;GO:0071704;GO:0098660;GO:0098661;GO:1901264;GO:1901576	GO:0005215;GO:0005452;GO:0015103;GO:0015114;GO:0015119;GO:0015152;GO:0015291;GO:0015297;GO:0015315;GO:0015318;GO:0015526;GO:0015605;GO:0022804;GO:0022857;GO:0061513;GO:1901505	GO:0005783;GO:0005789;GO:0016020;GO:0031090;GO:0043226;GO:0043227;GO:0043229;GO:0043231;GO:0110165	29	46	17.0377	13.647	15.4968	12.659	13.352	13.5963	13.5799	12.4817	15.92	13.5412	16.0809	13.0887	13.1152	12.8933	13.5697	12.8649	15.3828	11.6623	12.144	15.2146	12.6448	13.9848	15.6163	12.9914	13.2445	12.3899	12.7427	12.8062	12.6201	12.7614	14.6615	11.9432	15.1873	12.2333	15.747
+	4.0461	1.37068	K[54.0106]SGVVLHR[54.0106]AVPK[54.0106]DK	sp|P07332|FES_HUMAN	12K(54.0106),1K(54.0106),8R(54.0106)	P07332	FES_HUMAN	FES	Tyrosine-protein kinase Fes/Fps	GO:0000226;GO:0001578;GO:0002682;GO:0002684;GO:0002697;GO:0002703;GO:0002761;GO:0002763;GO:0002886;GO:0006468;GO:0006793;GO:0006796;GO:0006807;GO:0006935;GO:0006996;GO:0007010;GO:0007017;GO:0007098;GO:0007154;GO:0007155;GO:0007584;GO:0008152;GO:0008283;GO:0008360;GO:0009605;GO:0009987;GO:0009991;GO:0010033;GO:0010638;GO:0010720;GO:0010975;GO:0010976;GO:0014070;GO:0014855;GO:0016043;GO:0016310;GO:…	GO:0000166;GO:0003824;GO:0004672;GO:0004713;GO:0004715;GO:0005102;GO:0005488;GO:0005515;GO:0005524;GO:0005543;GO:0008017;GO:0008092;GO:0008289;GO:0015631;GO:0016301;GO:0016740;GO:0016772;GO:0016773;GO:0017076;GO:0030554;GO:0032553;GO:0032555;GO:0032559;GO:0034987;GO:0035091;GO:0035639;GO:0036094;GO:0043167;GO:0043168;GO:0097159;GO:0097367;GO:0140096;GO:1901265;GO:1901363	GO:0005737;GO:0005794;GO:0005829;GO:0005856;GO:0005925;GO:0009898;GO:0015630;GO:0030054;GO:0030055;GO:0031410;GO:0031982;GO:0043226;GO:0043227;GO:0043228;GO:0043229;GO:0043231;GO:0043232;GO:0070161;GO:0097708;GO:0098552;GO:0098562;GO:0110165	540	553	12.766	13.6917	12.2277	13.4263	13.4293	12.5381	13.5768	12.6198	14.3785	12.4155	13.1042	12.2676	12.8036	13.3852	20.5773	12.131	12.7803	12.758	19.7194	12.9252	11.3894	12.5021	18.3982	13.2848	17.4492	11.6782	12.271	14.0582	18.9101	17.7946	17.3723	12.6604	18.4037	12.1211	17.6406
+	8.76013	1.36859	QFIEMVNGTDSEVR[54.0106]C[125.0477]LGGR[54.0106]	sp|Q96S59|RANB9_HUMAN	14R(54.0106),15C(125.0477),19R(54.0106)	Q96S59	RANB9_HUMAN	RANBP9	Ran-binding protein 9	GO:0000226;GO:0006996;GO:0007010;GO:0007017;GO:0007020;GO:0009893;GO:0009966;GO:0009968;GO:0009987;GO:0010604;GO:0010646;GO:0010648;GO:0016043;GO:0019222;GO:0022607;GO:0023051;GO:0023057;GO:0043408;GO:0043409;GO:0043933;GO:0048518;GO:0048519;GO:0048523;GO:0048583;GO:0048585;GO:0050789;GO:0050794;GO:0051171;GO:0051173;GO:0051246;GO:0051247;GO:0060255;GO:0065003;GO:0065007;GO:0070372;GO:0070373;GO:…	GO:0005488;GO:0005515;GO:0019899;GO:0031267;GO:0051020	GO:0000151;GO:0005634;GO:0005654;GO:0005737;GO:0005829;GO:0005875;GO:0005886;GO:0016020;GO:0016604;GO:0032991;GO:0043226;GO:0043227;GO:0043229;GO:0043231;GO:0110165;GO:0140535;GO:1902494;GO:1990234	448	466	13.2771	13.77	12.2403	12.8135	13.2883	13.2082	14.371	12.9792	14.0873	12.7053	12.5867	13.5135	13.8607	12.2323	16.2328	12.8652	12.6764	11.8008	16.2003	13.2244	11.7556	13.8006	13.7424	10.5437	12.8153	11.9095	12.5765	12.9272	15.9559	14.0506	12.9139	12.3839	13.3131	12.1348	12.9935
+	4.75384	1.36748	DK[54.0106]LEFAPK[54.0106]AVLNRNR	sp|Q96EX1|SIM12_HUMAN	2K(54.0106),8K(54.0106)	Q96EX1	SIM12_HUMAN	SMIM12	Small integral membrane protein 12			GO:0016020;GO:0110165	74	88	19.3163	14.295	18.477	13.4332	19.3286	18.0223	18.8438	13.8527	18.3711	12.5435	17.7863	13.3008	13.1814	13.2281	18.2109	11.6992	12.0012	11.9021	18.3402	14.1506	13.2856	14.4515	12.9917	12.4455	13.2737	13.485	17.9128	12.9584	13.0236	12.3887	13.8604	11.8666	14.4136	13.4068	12.265
+	5.21825	1.3598	FGANAILGVSLAVC[130.0791]KAGAVEKGVPLYR[54.0106]	sp|P06733|ENOA_HUMAN	14C(130.0791),27R(54.0106)	P06733	ENOA_HUMAN	ENO1	Alpha-enolase	GO:0000122;GO:0001558;GO:0005975;GO:0005996;GO:0006006;GO:0006007;GO:0006082;GO:0006090;GO:0006091;GO:0006094;GO:0006096;GO:0006139;GO:0006140;GO:0006163;GO:0006195;GO:0006355;GO:0006357;GO:0006725;GO:0006734;GO:0006735;GO:0006753;GO:0006793;GO:0006796;GO:0006807;GO:0006937;GO:0008152;GO:0009056;GO:0009058;GO:0009117;GO:0009132;GO:0009134;GO:0009135;GO:0009137;GO:0009141;GO:0009144;GO:0009150;GO:…	GO:0000287;GO:0000976;GO:0000977;GO:0000981;GO:0001067;GO:0001217;GO:0001221;GO:0001222;GO:0001227;GO:0003676;GO:0003677;GO:0003690;GO:0003700;GO:0003712;GO:0003714;GO:0003723;GO:0003824;GO:0004634;GO:0005488;GO:0005515;GO:0008134;GO:0016829;GO:0016835;GO:0016836;GO:0019899;GO:0042802;GO:0042803;GO:0043167;GO:0043169;GO:0043565;GO:0045296;GO:0046872;GO:0046983;GO:0050839;GO:0051020;GO:0097159;GO:…	GO:0000015;GO:0005615;GO:0005634;GO:0005640;GO:0005737;GO:0005829;GO:0005886;GO:0005938;GO:0009986;GO:0016020;GO:0019867;GO:0031090;GO:0031430;GO:0031965;GO:0031968;GO:0031982;GO:0032991;GO:0043226;GO:0043227;GO:0043229;GO:0043230;GO:0043231;GO:0065010;GO:0070062;GO:0098588;GO:0110165;GO:1902494;GO:1903561	106	132	13.6182	18.5157	15.3336	13.6544	16.0865	14.273	16.277	13.2184	13.2812	12.6267	17.1252	14.0443	13.066	12.214	16.9266	11.7486	12.6641	11.7971	17.0928	16.7645	12.0687	13.5813	15.5231	13.0414	12.344	12.362	17.6856	14.7793	16.6136	17.1134	13.1083	12.5444	15.3382	13.1697	12.7935
+	6.12278	1.35892	R[54.0106]LPVSPSGRTDK[54.0106]HQPVSTAGK[54.0106]	sp|Q01484|ANK2_HUMAN	12K(54.0106),1R(54.0106),21K(54.0106)	Q01484	ANK2_HUMAN	ANK2	Ankyrin-2	GO:0001508;GO:0002027;GO:0003279;GO:0003283;GO:0006810;GO:0006811;GO:0006812;GO:0006816;GO:0006873;GO:0006874;GO:0006897;GO:0006937;GO:0006942;GO:0007043;GO:0007154;GO:0007165;GO:0008016;GO:0008104;GO:0009889;GO:0009891;GO:0009893;GO:0009987;GO:0010033;GO:0010468;GO:0010556;GO:0010557;GO:0010604;GO:0010628;GO:0010646;GO:0010880;GO:0010881;GO:0010882;GO:0010927;GO:0010959;GO:0015031;GO:0016043;GO:…	GO:0005198;GO:0005200;GO:0005488;GO:0005515;GO:0008092;GO:0008093;GO:0019899;GO:0019900;GO:0019901;GO:0030507;GO:0030674;GO:0044325;GO:0044877;GO:0051117;GO:0060090;GO:0140030;GO:0140031	GO:0000323;GO:0005739;GO:0005764;GO:0005768;GO:0005769;GO:0005773;GO:0005829;GO:0005856;GO:0005886;GO:0005911;GO:0014704;GO:0016020;GO:0016323;GO:0016324;GO:0030018;GO:0030054;GO:0030315;GO:0031410;GO:0031430;GO:0031672;GO:0031982;GO:0042383;GO:0042995;GO:0043005;GO:0043034;GO:0043226;GO:0043227;GO:0043228;GO:0043229;GO:0043231;GO:0043232;GO:0044291;GO:0045211;GO:0055037;GO:0070161;GO:0097060;GO:…	1936	1956	12.448	13.4133	13.2433	12.4103	13.4896	13.6428	14.0367	12.4013	13.7716	13.2483	12.4787	13.4916	12.5497	13.2985	13.2711	12.5247	12.8962	11.4507	12.727	13.2491	13.1876	13.7616	13.0932	12.7102	12.9829	12.2487	13.849	12.8453	12.1914	12.6489	13.194	11.9586	13.1943	12.0934	12.0384
+	5.23005	1.35676	VIVSMSIAFAQQTELSRISGGK[54.0106]	sp|Q99996|AKAP9_HUMAN	22K(54.0106)	Q99996	AKAP9_HUMAN	AKAP9	A-kinase anchor protein 9	GO:0000226;GO:0001932;GO:0001934;GO:0002027;GO:0006996;GO:0007010;GO:0007017;GO:0007020;GO:0007154;GO:0007165;GO:0007267;GO:0007268;GO:0008016;GO:0009628;GO:0009719;GO:0009893;GO:0009987;GO:0010033;GO:0010243;GO:0010562;GO:0010604;GO:0010638;GO:0010959;GO:0014070;GO:0014074;GO:0016043;GO:0019220;GO:0019222;GO:0022898;GO:0023052;GO:0031110;GO:0031112;GO:0031113;GO:0031116;GO:0031323;GO:0031325;GO:…	GO:0003676;GO:0003677;GO:0005102;GO:0005488;GO:0005515;GO:0015459;GO:0016247;GO:0034237;GO:0044325;GO:0051018;GO:0060090;GO:0097159;GO:0098772;GO:0099106;GO:0141108	GO:0005794;GO:0005795;GO:0005801;GO:0005813;GO:0005815;GO:0005829;GO:0005856;GO:0008076;GO:0016020;GO:0019897;GO:0019898;GO:0030054;GO:0030425;GO:0031984;GO:0032991;GO:0034702;GO:0034703;GO:0034705;GO:0042995;GO:0043005;GO:0043025;GO:0043226;GO:0043227;GO:0043228;GO:0043229;GO:0043231;GO:0043232;GO:0044297;GO:0044307;GO:0045202;GO:0097060;GO:0098590;GO:0098791;GO:0098796;GO:0098797;GO:0098890;GO:…	1447	1468	13.0362	13.7034	12.7435	12.3492	14.4828	14.8383	13.4239	12.2613	13.4546	13.1149	13.2629	13.1762	13.0495	12.4909	12.5762	12.8368	12.8927	12.1422	12.486	15.2802	12.9302	14.3977	12.9782	12.9468	13.0849	12.3068	13.1861	12.8556	17.7347	13.0703	12.3571	12.6956	12.4436	13.2285	12.3671
+	2.42138	1.35597	KEAAWAITNATSGGTPEQIR[54.0106]	sp|O60684|IMA7_HUMAN	20R(54.0106)	O60684	IMA7_HUMAN	KPNA6	Importin subunit alpha-7	GO:0001817;GO:0001819;GO:0006139;GO:0006351;GO:0006355;GO:0006357;GO:0006366;GO:0006606;GO:0006607;GO:0006725;GO:0006807;GO:0006810;GO:0006886;GO:0006913;GO:0008104;GO:0008152;GO:0009058;GO:0009059;GO:0009889;GO:0009891;GO:0009893;GO:0009987;GO:0010468;GO:0010556;GO:0010557;GO:0010604;GO:0010628;GO:0015031;GO:0016032;GO:0016070;GO:0018130;GO:0019079;GO:0019219;GO:0019222;GO:0019438;GO:0022414;GO:…	GO:0005048;GO:0005488;GO:0008139;GO:0033218;GO:0042277;GO:0061608;GO:0140104;GO:0140142	GO:0005634;GO:0005654;GO:0005829;GO:0016020;GO:0018995;GO:0031074;GO:0032991;GO:0042564;GO:0043226;GO:0043227;GO:0043229;GO:0043231;GO:0043657;GO:0110165	396	415	19.4405	20.007	19.4405	19.0727	20.4938	20.2869	19.1681	19.4608	20.3458	17.3363	19.9275	17.7883	12.7331	16.1095	20.2572	16.9898	18.6275	14.3047	20.2915	20.6523	12.8326	20.1018	19.3617	17.4896	17.8496	13.8021	19.5073	18.9507	12.8647	16.8182	18.6608	11.6333	12.3171	15.022	19.1531
+	4.04964	1.35323	EIM[15.9949]SQHNIYVDALLK[54.0106]	sp|Q96JG6|VPS50_HUMAN	15K(54.0106),3M(15.9949)	Q96JG6	VPS50_HUMAN	VPS50	Syndetin	GO:0006810;GO:0008104;GO:0009987;GO:0015031;GO:0016192;GO:0016197;GO:0032456;GO:0033036;GO:0045184;GO:0046907;GO:0051179;GO:0051234;GO:0051641;GO:0051649;GO:0051668;GO:0070727;GO:0071702;GO:0071705;GO:0098876	GO:0000149;GO:0005488;GO:0005515	GO:0005768;GO:0016020;GO:0031410;GO:0031982;GO:0032991;GO:0043226;GO:0043227;GO:0043229;GO:0043230;GO:0043231;GO:0048471;GO:0055037;GO:0065010;GO:0070062;GO:0097708;GO:0110165;GO:1903561;GO:1990745	807	821	14.1877	14.1958	18.1948	13.7208	12.7894	12.3558	13.619	12.4879	13.5923	13.0292	17.7983	14.1445	12.8111	12.3737	17.8676	13.0082	12.9418	12.4176	18.0148	14.5611	13.4716	13.6668	13.9177	18.4866	18.0386	12.0935	18.2898	12.7038	17.7186	17.7214	18.2506	12.6429	17.8789	12.4384	13.2807
+	2.39505	1.35317	IGPQHQAGSDSLLTGM[15.9949]AFFK[54.0106]M[15.9949]R	sp|Q9UIV1|CNOT7_HUMAN	16M(15.9949),20K(54.0106),21M(15.9949)	Q9UIV1	CNOT7_HUMAN	CNOT7	CCR4-NOT transcription complex subunit 7	GO:0000289;GO:0000290;GO:0000291;GO:0000956;GO:0001932;GO:0001959;GO:0001960;GO:0002682;GO:0002683;GO:0002831;GO:0002832;GO:0006139;GO:0006355;GO:0006357;GO:0006401;GO:0006402;GO:0006725;GO:0006807;GO:0006950;GO:0006952;GO:0006996;GO:0008152;GO:0008284;GO:0008285;GO:0009056;GO:0009057;GO:0009605;GO:0009607;GO:0009615;GO:0009889;GO:0009890;GO:0009891;GO:0009892;GO:0009893;GO:0009894;GO:0009896;GO:…	GO:0000175;GO:0003676;GO:0003712;GO:0003714;GO:0003723;GO:0003824;GO:0004518;GO:0004527;GO:0004532;GO:0004535;GO:0004540;GO:0005488;GO:0005515;GO:0008134;GO:0008408;GO:0016787;GO:0016788;GO:0016796;GO:0016896;GO:0043167;GO:0043169;GO:0046872;GO:0097159;GO:0140098;GO:0140110;GO:0140297;GO:0140640	GO:0000932;GO:0005634;GO:0005737;GO:0005829;GO:0016020;GO:0016604;GO:0016607;GO:0030014;GO:0030015;GO:0032991;GO:0035770;GO:0036464;GO:0043226;GO:0043227;GO:0043228;GO:0043229;GO:0043231;GO:0043232;GO:0099080;GO:0110165;GO:0140535	221	242	14.5705	20.6767	12.5501	13.4014	21.5118	20.6064	21.2609	13.3539	21.5068	12.2721	20.776	12.8929	13.264	11.9161	13.2627	11.7679	13.0307	11.7173	12.5493	22.2975	12.3228	12.8349	12.8563	12.3379	11.9921	13.6363	21.1674	13.7909	13.2893	12.3765	13.7953	12.6279	13.7642	11.8579	13.2314
+	4.65896	1.35185	AQLQEQVGQVTC[125.0477]QK[54.0106]	sp|H7BZ55|CRCC2_HUMAN	12C(125.0477),14K(54.0106)	H7BZ55	CRCC2_HUMAN	CROCC2	Ciliary rootlet coiled-coil protein 2			GO:0005813;GO:0005814;GO:0005815;GO:0043226;GO:0043228;GO:0043229;GO:0043232;GO:0110165	715	728	12.6939	13.4209	12.1508	12.9865	12.6505	13.1841	12.5144	12.0134	13.3469	13.439	14.0393	13.6233	12.9151	12.888	13.7629	11.7742	12.9635	12.785	12.8789	14.712	12.5265	13.7138	12.9588	13.0568	17.5181	12.3569	12.9457	13.1111	12.4917	13.2675	13.2368	12.4298	12.4559	11.7446	13.1349
+	2.94155	1.34883	K[54.0106]EVQQLSVSFSSLQIKALQNAVEK	sp|Q96D42|HAVR1_HUMAN	1K(54.0106)	Q96D42	HAVR1_HUMAN	HAVCR1	Hepatitis A virus cellular receptor 1	GO:0002682;GO:0002684;GO:0002694;GO:0002696;GO:0006911;GO:0009987;GO:0010324;GO:0016043;GO:0033003;GO:0033005;GO:0048518;GO:0048522;GO:0050789;GO:0050794;GO:0050865;GO:0050867;GO:0051239;GO:0051240;GO:0061024;GO:0065007;GO:0071840;GO:0099024	GO:0001618;GO:0001786;GO:0005488;GO:0005515;GO:0005543;GO:0008289;GO:0072341;GO:0140272	GO:0005886;GO:0005929;GO:0009986;GO:0016020;GO:0031514;GO:0042995;GO:0043226;GO:0043227;GO:0110165;GO:0120025	323	346	19.5838	20.7501	19.5043	18.7262	20.6344	20.7687	19.9548	19.1039	21.2372	19.1145	20.1372	16.0014	19.1378	17.348	20.4237	17.8431	18.0009	16.9896	19.8853	20.9491	13.214	19.3204	18.9363	15.8631	18.7982	15.5627	19.9237	17.9524	20.1556	19.708	18.7312	17.5456	19.6496	16.8579	19.0753
+	7.92314	1.34512	HVVC[125.0477]AAETGSGK[54.0106]	sp|Q9NUL7|DDX28_HUMAN	12K(54.0106),4C(125.0477)	Q9NUL7	DDX28_HUMAN	DDX28	Probable ATP-dependent RNA helicase DDX28	GO:0000027;GO:0009987;GO:0016043;GO:0022607;GO:0022618;GO:0043933;GO:0065003;GO:0071826;GO:0071840;GO:1902775	GO:0000166;GO:0003676;GO:0003723;GO:0003724;GO:0003824;GO:0004386;GO:0005488;GO:0005524;GO:0008186;GO:0016462;GO:0016787;GO:0016817;GO:0016818;GO:0016887;GO:0017076;GO:0017111;GO:0019843;GO:0030554;GO:0032553;GO:0032555;GO:0032559;GO:0035639;GO:0036094;GO:0043167;GO:0043168;GO:0097159;GO:0097367;GO:0140098;GO:0140640;GO:0140657;GO:1901265;GO:1901363	GO:0005654;GO:0005730;GO:0005739;GO:0005829;GO:0009295;GO:0035770;GO:0042645;GO:0043226;GO:0043227;GO:0043228;GO:0043229;GO:0043231;GO:0043232;GO:0099080;GO:0110165	167	178	16.525	13.1734	17.0064	15.3131	16.511	16.31	15.8868	13.2641	16.4546	12.8354	16.8578	12.1386	16.0462	12.8254	16.051	15.2901	15.9745	12.0531	15.7145	13.405	13.1986	13.1418	15.701	15.5245	15.2193	11.4244	14.9285	11.9702	16.3989	15.7298	15.8193	15.2596	14.6974	12.5299	16.4119
+	7.85049	1.34188	WKSASEAVQDPQFWK[54.0106]LVDDER	sp|C5H431|POLG_WSLV	15K(54.0106)	C5H431	POLG_WSLV		Genome polyprotein				2919	2939	12.6171	13.5496	15.6138	12.2013	13.7232	12.6866	13.4367	14.032	13.4214	13.8496	13.7336	12.8957	13.0236	12.6528	14.0442	13.5563	12.4808	11.9755	13.0906	14.2899	12.9088	12.7226	12.5322	14.0557	15.1114	12.0373	13.8018	12.4031	16.3889	12.9582	13.0624	12.841	17.4902	11.24	13.412
+	4.4545	1.34092	CIKPNDEKLPFHFDPK[54.0106]	sp|Q9ULV0|MYO5B_HUMAN	16K(54.0106)	Q9ULV0	MYO5B_HUMAN	MYO5B	Unconventional myosin-Vb	GO:0003008;GO:0003014;GO:0003091;GO:0006810;GO:0007015;GO:0008104;GO:0009987;GO:0015031;GO:0016043;GO:0016192;GO:0016197;GO:0030029;GO:0030048;GO:0030050;GO:0030705;GO:0032501;GO:0033036;GO:0042592;GO:0045184;GO:0046907;GO:0048871;GO:0048878;GO:0050878;GO:0050891;GO:0051179;GO:0051234;GO:0051640;GO:0051641;GO:0051648;GO:0051649;GO:0051650;GO:0051656;GO:0065007;GO:0065008;GO:0070727;GO:0071702;GO:…	GO:0000146;GO:0000166;GO:0003774;GO:0003779;GO:0005488;GO:0005515;GO:0005516;GO:0005524;GO:0008092;GO:0017076;GO:0019899;GO:0030554;GO:0031267;GO:0032553;GO:0032555;GO:0032559;GO:0035639;GO:0036094;GO:0043167;GO:0043168;GO:0044877;GO:0051015;GO:0051020;GO:0097159;GO:0097367;GO:0140657;GO:1901265;GO:1901363	GO:0005737;GO:0005856;GO:0005938;GO:0012506;GO:0015629;GO:0016020;GO:0016459;GO:0030659;GO:0031090;GO:0031982;GO:0032991;GO:0043226;GO:0043227;GO:0043228;GO:0043229;GO:0043230;GO:0043232;GO:0045179;GO:0065010;GO:0070062;GO:0099568;GO:0099738;GO:0110165;GO:1903561	657	672	20.1506	20.4429	19.9906	16.9862	20.5286	19.7785	20.3258	20.0479	21.979	19.0901	19.857	19.4154	18.5319	12.6691	18.9195	17.3559	18.9669	17.2676	19.0571	19.4222	13.1715	19.4309	19.7302	17.907	19.464	15.3451	20.2993	20.015	18.6795	18.2499	19.032	18.3453	18.458	16.7499	19.4437
+	3.85884	1.33584	DGLLPTGLGQR[54.0106]	sp|P58107|EPIPL_HUMAN	11R(54.0106)	P58107	EPIPL_HUMAN	EPPK1	Epiplakin	GO:0006950;GO:0006996;GO:0007010;GO:0008285;GO:0009611;GO:0009987;GO:0010632;GO:0010633;GO:0010837;GO:0010839;GO:0016043;GO:0022607;GO:0030334;GO:0030336;GO:0032101;GO:0032102;GO:0040008;GO:0040012;GO:0040013;GO:0042060;GO:0042127;GO:0045103;GO:0045104;GO:0045109;GO:0045110;GO:0048519;GO:0048523;GO:0048583;GO:0048585;GO:0048638;GO:0050678;GO:0050680;GO:0050789;GO:0050793;GO:0050794;GO:0050896;GO:…	GO:0003676;GO:0003723;GO:0005198;GO:0005488;GO:0019215;GO:0097159;GO:1990254	GO:0005737;GO:0005856;GO:0005882;GO:0005911;GO:0005923;GO:0016020;GO:0016323;GO:0016327;GO:0030054;GO:0030055;GO:0030056;GO:0042995;GO:0043226;GO:0043228;GO:0043229;GO:0043232;GO:0045095;GO:0045111;GO:0070160;GO:0070161;GO:0071944;GO:0097356;GO:0098590;GO:0099080;GO:0099081;GO:0099512;GO:0099513;GO:0110165	1268	1278	19.663	12.799	18.5268	13.0696	19.5687	18.4313	19.902	13.7659	19.7052	13.6244	20.4813	13.6428	13.0403	12.847	18.7656	12.9382	11.7562	11.9594	20.3331	14.5667	12.272	14.0469	14.8874	12.9198	13.1381	12.0287	17.5319	11.7464	12.5442	13.5507	13.1475	12.9873	13.3267	11.4771	12.4402
+	5.53587	1.33489	NK[54.0106]ADQQLVEIDKKYAGFIHMK[54.0106]	sp|Q6KC79|NIPBL_HUMAN	21K(54.0106),2K(54.0106)	Q6KC79	NIPBL_HUMAN	NIPBL	Nipped-B-like protein	GO:0000070;GO:0000122;GO:0000724;GO:0000725;GO:0000819;GO:0001656;GO:0001822;GO:0003006;GO:0003007;GO:0003008;GO:0003151;GO:0006139;GO:0006259;GO:0006281;GO:0006302;GO:0006310;GO:0006325;GO:0006338;GO:0006355;GO:0006357;GO:0006725;GO:0006807;GO:0006950;GO:0006974;GO:0006996;GO:0007059;GO:0007062;GO:0007064;GO:0007420;GO:0007600;GO:0007605;GO:0008104;GO:0008152;GO:0009314;GO:0009628;GO:0009653;GO:…	GO:0003682;GO:0003712;GO:0003714;GO:0003824;GO:0005488;GO:0005515;GO:0019899;GO:0019904;GO:0036033;GO:0042826;GO:0044877;GO:0061775;GO:0070087;GO:0140097;GO:0140110;GO:0140640;GO:1990841	GO:0000785;GO:0005634;GO:0005654;GO:0005829;GO:0031982;GO:0032039;GO:0032116;GO:0032991;GO:0032993;GO:0043226;GO:0043227;GO:0043229;GO:0043230;GO:0043231;GO:0065010;GO:0070062;GO:0090694;GO:0110165;GO:0140513;GO:1903561	2336	2356	13.5807	13.7461	14.906	13.252	13.3895	12.6628	13.8851	12.9264	13.7297	12.9038	12.5574	13.4025	13.47	12.8509	13.82	12.1017	13.3981	11.933	12.4881	15.0407	12.4143	13.2222	14.4126	12.4595	15.8125	13.1549	12.7903	13.6449	16.3032	12.0308	11.9757	12.9603	13.0274	12.9305	12.9834
+	6.33021	1.33342	LFPNADSK[54.0106]ALDLLDK[54.0106]	sp|P28482|MK01_HUMAN	15K(54.0106),8K(54.0106)	P28482	MK01_HUMAN	MAPK1	Mitogen-activated protein kinase 1	GO:0000165;GO:0000302;GO:0001568;GO:0001932;GO:0001934;GO:0002253;GO:0002376;GO:0002429;GO:0002682;GO:0002684;GO:0002685;GO:0002687;GO:0002688;GO:0002690;GO:0002757;GO:0002764;GO:0002768;GO:0003008;GO:0006139;GO:0006206;GO:0006468;GO:0006725;GO:0006793;GO:0006796;GO:0006807;GO:0006810;GO:0006873;GO:0006885;GO:0006897;GO:0006915;GO:0006935;GO:0006950;GO:0006974;GO:0006979;GO:0007049;GO:0007154;GO:…	GO:0000166;GO:0001784;GO:0003676;GO:0003677;GO:0003824;GO:0004672;GO:0004674;GO:0004707;GO:0004708;GO:0004712;GO:0005488;GO:0005515;GO:0005524;GO:0008353;GO:0016301;GO:0016740;GO:0016772;GO:0016773;GO:0017076;GO:0019899;GO:0019902;GO:0030554;GO:0032553;GO:0032555;GO:0032559;GO:0035639;GO:0036094;GO:0042802;GO:0043167;GO:0043168;GO:0045309;GO:0051219;GO:0097159;GO:0097367;GO:0106310;GO:0140096;GO:…	GO:0005576;GO:0005634;GO:0005654;GO:0005737;GO:0005739;GO:0005768;GO:0005769;GO:0005770;GO:0005775;GO:0005788;GO:0005794;GO:0005815;GO:0005819;GO:0005829;GO:0005856;GO:0005886;GO:0005901;GO:0005925;GO:0016020;GO:0030054;GO:0030055;GO:0031143;GO:0031410;GO:0031974;GO:0031982;GO:0031983;GO:0034774;GO:0035578;GO:0042995;GO:0043226;GO:0043227;GO:0043228;GO:0043229;GO:0043231;GO:0043232;GO:0043233;GO:…	278	292	13.6539	12.8295	13.4409	12.703	12.6491	13.9005	14.3982	12.4278	14.7674	13.0775	14.83	12.2547	13.278	12.3578	17.4989	12.055	12.6569	11.8607	17.5043	14.3007	12.9027	13.7818	18.7039	12.5957	17.6366	12.5773	13.4066	11.7857	18.8105	13.0121	18.0655	13.1497	18.1781	11.0847	17.9554
+	11.5818	1.3304	EGIPLIILAGK[54.0106]K[54.0106]	sp|P48200|IREB2_HUMAN	11K(54.0106),12K(54.0106)	P48200	IREB2_HUMAN	IREB2	Iron-responsive element-binding protein 2	GO:0002262;GO:0002376;GO:0002521;GO:0002573;GO:0003008;GO:0006082;GO:0006099;GO:0006101;GO:0006417;GO:0006725;GO:0006778;GO:0006779;GO:0006782;GO:0006807;GO:0006810;GO:0006873;GO:0006879;GO:0008152;GO:0009058;GO:0009791;GO:0009889;GO:0009891;GO:0009892;GO:0009893;GO:0009894;GO:0009895;GO:0009987;GO:0010468;GO:0010556;GO:0010557;GO:0010604;GO:0010605;GO:0010608;GO:0010628;GO:0018130;GO:0019219;GO:…	GO:0003676;GO:0003723;GO:0003729;GO:0003824;GO:0003994;GO:0005488;GO:0016829;GO:0016835;GO:0016836;GO:0030350;GO:0043167;GO:0043169;GO:0046872;GO:0051536;GO:0051539;GO:0051540;GO:0097159	GO:0005737;GO:0005739;GO:0005829;GO:0043226;GO:0043227;GO:0043229;GO:0043231;GO:0110165	837	848	13.2286	13.3122	15.4244	12.3653	12.5238	13.6377	13.8751	12.9153	12.8224	12.1066	13.2066	13.3804	12.9319	12.1067	12.4441	12.3235	13.2695	11.3591	14.0438	14.1499	12.106	13.2465	13.5162	12.9866	15.21	11.7142	12.6449	12.612	14.7437	13.2583	14.5761	12.2242	12.5511	12.0601	12.5427
+	8.45616	1.33033	DQNFLTLM[15.9949]K[54.0106]R[54.0106]	sp|P10632|CP2C8_HUMAN	10R(54.0106),8M(15.9949),9K(54.0106)	P10632	CP2C8_HUMAN	CYP2C8	Cytochrome P450 2C8	GO:0001523;GO:0001676;GO:0002933;GO:0006066;GO:0006082;GO:0006629;GO:0006631;GO:0006633;GO:0006690;GO:0006720;GO:0006721;GO:0006805;GO:0008152;GO:0008202;GO:0008210;GO:0008610;GO:0009056;GO:0009058;GO:0009987;GO:0010817;GO:0016053;GO:0016101;GO:0019369;GO:0019373;GO:0019752;GO:0030258;GO:0032787;GO:0033559;GO:0034308;GO:0042178;GO:0042445;GO:0042572;GO:0042573;GO:0042759;GO:0043436;GO:0044237;GO:…	GO:0003824;GO:0004497;GO:0005488;GO:0005506;GO:0008391;GO:0008392;GO:0008395;GO:0008401;GO:0016491;GO:0016705;GO:0016712;GO:0016725;GO:0020037;GO:0033695;GO:0034875;GO:0043167;GO:0043169;GO:0046872;GO:0046906;GO:0046914;GO:0070330;GO:0097159;GO:0101020	GO:0005737;GO:0005789;GO:0005886;GO:0016020;GO:0031090;GO:0043226;GO:0043227;GO:0043229;GO:0043231;GO:0110165	191	200	12.5695	13.1615	14.3949	12.68	12.4934	13.3344	13.975	12.8299	15.0266	13.102	13.2093	12.364	12.4678	13.291	14.3778	12.2216	16.2366	11.7678	15.5384	14.0506	13.7841	13.1994	16.3798	12.2258	15.167	11.9675	15.0715	12.7789	13.0513	13.7948	16.1805	13.0173	15.0374	12.1075	15.5455
+	5.71325	1.32249	LYDLRDLSLSMK[54.0106]	sp|Q5JSH3|WDR44_HUMAN	12K(54.0106)	Q5JSH3	WDR44_HUMAN	WDR44	WD repeat-containing protein 44	GO:0006996;GO:0009987;GO:0010639;GO:0016043;GO:0022607;GO:0030030;GO:0030031;GO:0031344;GO:0031345;GO:0032879;GO:0033043;GO:0044087;GO:0044782;GO:0048519;GO:0048523;GO:0050789;GO:0050794;GO:0051049;GO:0051128;GO:0051129;GO:0060271;GO:0060491;GO:0060627;GO:0061824;GO:0065007;GO:0070925;GO:0071840;GO:0120031;GO:0120032;GO:0120033;GO:0120035;GO:0120036;GO:1902017;GO:1902018;GO:1902115;GO:1902116	GO:0005488;GO:0005515;GO:0019899;GO:0031267;GO:0051020;GO:0140313	GO:0005794;GO:0005829;GO:0010008;GO:0012506;GO:0016020;GO:0030659;GO:0031090;GO:0043226;GO:0043227;GO:0043229;GO:0043231;GO:0048471;GO:0098588;GO:0110165	768	779	12.8273	12.955	13.1652	13.0083	13.5832	14.0902	13.216	12.8938	13.4983	12.3067	13.2919	13.0131	12.9805	12.8504	13.5349	13.419	13.0652	11.7157	12.9229	14.7042	12.4239	13.6068	13.4078	12.7134	12.4057	12.2571	12.5085	12.7609	12.8089	11.5426	12.819	12.1798	12.8004	12.7847	12.6093
+	6.24233	1.32243	WGSQGER[54.0106]GKDK	sp|Q06210|GFPT1_HUMAN	7R(54.0106)	Q06210	GFPT1_HUMAN	GFPT1	Glutamine--fructose-6-phosphate aminotransferase [isomerizing] 1	GO:0006002;GO:0006040;GO:0006047;GO:0006048;GO:0006082;GO:0006091;GO:0006112;GO:0006139;GO:0006486;GO:0006487;GO:0006520;GO:0006541;GO:0006725;GO:0006793;GO:0006796;GO:0006807;GO:0007623;GO:0008152;GO:0009058;GO:0009064;GO:0009225;GO:0009226;GO:0009889;GO:0009987;GO:0010468;GO:0010556;GO:0015980;GO:0018130;GO:0019222;GO:0019438;GO:0019538;GO:0019637;GO:0019752;GO:0031323;GO:0031326;GO:0032922;GO:…	GO:0003824;GO:0004360;GO:0005488;GO:0008483;GO:0016740;GO:0016769;GO:0070548;GO:0097367	GO:0005829;GO:0031982;GO:0043226;GO:0043227;GO:0043230;GO:0065010;GO:0070062;GO:0110165;GO:1903561	240	250	12.2283	12.8111	13.1529	14.1442	13.0554	13.2117	15.733	13.5182	12.8575	12.5819	13.8985	13.2769	13.0758	12.6721	15.508	11.7373	16.8058	12.4541	12.9237	14.8195	13.3024	14.1389	16.8274	12.2696	11.9084	11.8855	15.9728	16.1624	12.6868	15.3053	16.9372	12.0105	18.1899	15.1528	17.3785
+	7.83439	1.3199	ILM[15.9949]QLQADILYIPVVK[54.0106]	sp|P32189|GLPK_HUMAN	16K(54.0106),3M(15.9949)	P32189	GLPK_HUMAN	GK	Glycerol kinase	GO:0005975;GO:0006066;GO:0006071;GO:0006072;GO:0006629;GO:0006638;GO:0006639;GO:0006641;GO:0006793;GO:0006796;GO:0008152;GO:0008610;GO:0009056;GO:0009058;GO:0009987;GO:0016052;GO:0016310;GO:0019400;GO:0019405;GO:0019432;GO:0019563;GO:0019637;GO:0019751;GO:0044237;GO:0044238;GO:0044249;GO:0044255;GO:0044281;GO:0044282;GO:0045017;GO:0046164;GO:0046167;GO:0046174;GO:0046460;GO:0046463;GO:0046486;GO:…	GO:0000166;GO:0003824;GO:0004370;GO:0005488;GO:0005524;GO:0016301;GO:0016740;GO:0016772;GO:0016773;GO:0017076;GO:0030554;GO:0032553;GO:0032555;GO:0032559;GO:0035639;GO:0036094;GO:0043167;GO:0043168;GO:0097159;GO:0097367;GO:1901265;GO:1901363	GO:0005739;GO:0005741;GO:0005829;GO:0016020;GO:0019867;GO:0031090;GO:0031966;GO:0031968;GO:0031982;GO:0043226;GO:0043227;GO:0043229;GO:0043230;GO:0043231;GO:0065010;GO:0070062;GO:0098588;GO:0110165;GO:1903561	439	454	16.6861	12.9212	15.7068	15.0228	12.3545	14.9057	14.1428	13.0601	16.0333	15.7811	15.8625	13.4627	14.4115	12.1579	14.7076	13.2649	12.1337	12.0072	14.6388	13.7366	12.8848	16.0757	13.2738	12.2112	15.111	11.9022	14.9438	12.7373	16.0285	14.7	15.9496	14.5507	14.5968	12.8676	13.7161
+	4.03353	1.31446	WK[54.0106]EVK[54.0106]R[54.0106]AALSEMVEYITHNR	sp|Q13362|2A5G_HUMAN	2K(54.0106),5K(54.0106),6R(54.0106)	Q13362	2A5G_HUMAN	PPP2R5C	Serine/threonine-protein phosphatase 2A 56 kDa regulatory subunit gamma isoform	GO:0000075;GO:0000077;GO:0006508;GO:0006511;GO:0006807;GO:0006950;GO:0006974;GO:0006977;GO:0007093;GO:0007165;GO:0007346;GO:0008152;GO:0008285;GO:0008630;GO:0009056;GO:0009057;GO:0009987;GO:0010498;GO:0010564;GO:0010948;GO:0019538;GO:0019941;GO:0022402;GO:0030163;GO:0030330;GO:0031570;GO:0031571;GO:0033554;GO:0035556;GO:0042127;GO:0042770;GO:0042771;GO:0043161;GO:0043170;GO:0043632;GO:0044238;GO:…	GO:0008047;GO:0019208;GO:0019211;GO:0019888;GO:0030234;GO:0072542;GO:0098772;GO:0140677	GO:0000159;GO:0000775;GO:0005634;GO:0005654;GO:0005794;GO:0005829;GO:0008287;GO:0032991;GO:0043226;GO:0043227;GO:0043229;GO:0043231;GO:0098687;GO:0110165;GO:1902494;GO:1903293	65	84	18.3477	13.3554	18.4736	14.5169	19.3465	18.4655	19.1945	13.3521	19.1754	13.5822	18.5757	12.4252	12.7339	13.1646	18.6662	13.3454	13.1195	11.6891	18.9615	14.3657	10.6107	12.9192	13.0375	13.0801	12.3571	12.47	18.9591	12.688	12.4282	12.1628	13.2865	13.2869	12.6242	13.4238	13.0266
+	5.94187	1.31234	K[54.0106]GM[15.9949]FR[54.0106]TVGQLYK	sp|P35579|MYH9_HUMAN	1K(54.0106),3M(15.9949),5R(54.0106)	P35579	MYH9_HUMAN	MYH9	Myosin-9	GO:0000212;GO:0000226;GO:0000768;GO:0001525;GO:0001667;GO:0001701;GO:0001767;GO:0001768;GO:0001778;GO:0002376;GO:0002521;GO:0002573;GO:0006508;GO:0006509;GO:0006807;GO:0006810;GO:0006887;GO:0006911;GO:0006949;GO:0006996;GO:0007009;GO:0007010;GO:0007017;GO:0007051;GO:0007155;GO:0007163;GO:0007165;GO:0007166;GO:0007229;GO:0007275;GO:0007520;GO:0008104;GO:0008152;GO:0008360;GO:0009790;GO:0009792;GO:…	GO:0000146;GO:0000166;GO:0003676;GO:0003723;GO:0003774;GO:0003779;GO:0005102;GO:0005178;GO:0005488;GO:0005515;GO:0005516;GO:0005524;GO:0008092;GO:0017076;GO:0019904;GO:0030554;GO:0030674;GO:0032553;GO:0032555;GO:0032559;GO:0035639;GO:0036094;GO:0042802;GO:0042803;GO:0043167;GO:0043168;GO:0043495;GO:0043531;GO:0044877;GO:0045296;GO:0046983;GO:0050839;GO:0051015;GO:0060090;GO:0097159;GO:0097367;GO:…	GO:0001725;GO:0001726;GO:0001772;GO:0001931;GO:0005634;GO:0005737;GO:0005819;GO:0005826;GO:0005829;GO:0005856;GO:0005886;GO:0005903;GO:0005911;GO:0005912;GO:0005925;GO:0009898;GO:0015629;GO:0016020;GO:0016459;GO:0016460;GO:0016604;GO:0030054;GO:0030055;GO:0030141;GO:0031252;GO:0031410;GO:0031594;GO:0031982;GO:0032154;GO:0032432;GO:0032982;GO:0032991;GO:0042641;GO:0042995;GO:0043226;GO:0043227;GO:…	640	651	13.6215	13.0569	12.053	13.1686	13.2583	13.8902	13.0498	13.196	13.0172	13.3199	12.8377	14.1926	14.1453	13.9466	13.8622	11.9198	13.1186	12.8848	13.345	14.8666	11.8722	13.0775	12.8513	12.9232	11.8068	11.722	13.0766	12.5814	16.1118	12.2834	12.6898	12.4861	13.072	12.6855	11.9817
+	7.83022	1.31084	ENAGAAEKAISVHSTPEGC[125.0477]SSAC[130.0791]K[54.0106]	sp|Q9NZI8|IF2B1_HUMAN	19C(125.0477),23C(130.0791),24K(54.0106)	Q9NZI8	IF2B1_HUMAN	IGF2BP1	Insulin-like growth factor 2 mRNA-binding protein 1	GO:0001817;GO:0006417;GO:0006810;GO:0007399;GO:0008283;GO:0009653;GO:0009889;GO:0009890;GO:0009891;GO:0009892;GO:0009893;GO:0009894;GO:0009895;GO:0009987;GO:0010468;GO:0010556;GO:0010557;GO:0010558;GO:0010604;GO:0010605;GO:0010608;GO:0010610;GO:0010628;GO:0010629;GO:0015931;GO:0016043;GO:0017148;GO:0019219;GO:0019222;GO:0019827;GO:0021846;GO:0022013;GO:0030030;GO:0031323;GO:0031324;GO:0031325;GO:…	GO:0003676;GO:0003723;GO:0003729;GO:0003730;GO:0005488;GO:0030674;GO:0045182;GO:0048027;GO:0060090;GO:0097159;GO:0140517;GO:1990247	GO:0000932;GO:0005634;GO:0005654;GO:0005737;GO:0005829;GO:0010494;GO:0030027;GO:0030175;GO:0030426;GO:0030427;GO:0032991;GO:0035770;GO:0036464;GO:0042995;GO:0043005;GO:0043025;GO:0043197;GO:0043226;GO:0043227;GO:0043228;GO:0043229;GO:0043231;GO:0043232;GO:0044297;GO:0044309;GO:0048471;GO:0070937;GO:0098794;GO:0098858;GO:0099080;GO:0110165;GO:0120025;GO:0140535;GO:1990904	235	258	13.4392	12.6195	12.5935	12.228	16.0838	13.1583	15.7379	13.3631	12.9115	13.0231	12.0468	12.8606	13.3544	12.3781	15.0796	12.7557	12.7037	13.0298	14.8949	16.7942	11.5743	12.3081	12.7657	13.0374	12.4901	12.0078	11.7062	13.8354	16.0514	13.1302	13.1431	11.7415	15.9632	13.546	13.0981
+	7.56089	1.3051	GK[54.0106]AAILDLEK	sp|Q15075|EEA1_HUMAN	2K(54.0106)	Q15075	EEA1_HUMAN	EEA1	Early endosome antigen 1	GO:0003008;GO:0006810;GO:0006897;GO:0006906;GO:0006996;GO:0007032;GO:0007165;GO:0007166;GO:0009987;GO:0016043;GO:0016050;GO:0016189;GO:0016192;GO:0016197;GO:0032501;GO:0044403;GO:0044419;GO:0044788;GO:0045022;GO:0046907;GO:0048284;GO:0050789;GO:0050794;GO:0050877;GO:0051179;GO:0051234;GO:0051641;GO:0051649;GO:0051702;GO:0051851;GO:0061024;GO:0061025;GO:0065007;GO:0071840;GO:0090174;GO:0098657;GO:…	GO:0005488;GO:0005515;GO:0005516;GO:0005543;GO:0005545;GO:0008270;GO:0008289;GO:0030742;GO:0035091;GO:0042802;GO:0042803;GO:0043167;GO:0043169;GO:0046872;GO:0046914;GO:0046983	GO:0005768;GO:0005769;GO:0005829;GO:0005969;GO:0010008;GO:0012506;GO:0016020;GO:0030054;GO:0030659;GO:0031090;GO:0031410;GO:0031901;GO:0031982;GO:0032991;GO:0042995;GO:0043005;GO:0043226;GO:0043227;GO:0043229;GO:0043230;GO:0043231;GO:0044308;GO:0044309;GO:0045202;GO:0055037;GO:0065010;GO:0070062;GO:0097708;GO:0098588;GO:0098685;GO:0098794;GO:0098978;GO:0110165;GO:0120025;GO:1902494;GO:1903561;GO:…	883	892	14.7083	15.5234	12.5039	12.143	16.5475	15.5261	17.1529	14.7103	16.7296	14.726	17.337	16.2233	15.9375	13.9737	16.3414	14.3178	15.6929	13.384	15.4343	17.8402	16.7385	14.3623	16.0059	15.8496	15.2737	12.2951	16.4457	15.5314	16.0468	15.6112	15.0153	14.5567	16.3046	12.9697	15.2996
+	4.0597	1.30474	WDIQKYAR[54.0106]	sp|Q93088|BHMT1_HUMAN	8R(54.0106)	Q93088	BHMT1_HUMAN	BHMT	Betaine--homocysteine S-methyltransferase 1	GO:0000096;GO:0000097;GO:0006082;GO:0006479;GO:0006520;GO:0006521;GO:0006555;GO:0006575;GO:0006577;GO:0006579;GO:0006790;GO:0006807;GO:0008152;GO:0008213;GO:0008652;GO:0009056;GO:0009058;GO:0009066;GO:0009067;GO:0009086;GO:0009987;GO:0010565;GO:0016053;GO:0019222;GO:0019538;GO:0019752;GO:0031323;GO:0031335;GO:0032259;GO:0033238;GO:0034641;GO:0036211;GO:0042219;GO:0042762;GO:0043094;GO:0043102;GO:…	GO:0003824;GO:0005488;GO:0008168;GO:0008172;GO:0008270;GO:0016740;GO:0016741;GO:0043167;GO:0043169;GO:0046872;GO:0046914;GO:0047150	GO:0005634;GO:0005829;GO:0031982;GO:0043226;GO:0043227;GO:0043229;GO:0043230;GO:0043231;GO:0065010;GO:0070062;GO:0110165;GO:1903561	279	286	13.7482	12.549	13.3769	13.0697	12.8977	14.2667	13.5457	12.2876	13.3519	13.3689	13.8437	13.6377	13.3654	12.9658	17.4601	12.2574	13.0478	12.1424	17.7262	13.5117	11.578	14.0916	16.2556	19.2707	17.9255	11.5657	13.266	12.4642	18.0113	16.1537	19.7874	13.3727	12.1187	12.3294	15.9026
+	4.18261	1.30459	ALTEC[130.0791]QGAVGLGSK[54.0106]PVR[54.0106]	sp|Q9NX07|TSAP1_HUMAN	14K(54.0106),17R(54.0106),5C(130.0791)	Q9NX07	TSAP1_HUMAN	TRNAU1AP	tRNA selenocysteine 1-associated protein 1	GO:0001514;GO:0006414;GO:0006417;GO:0006451;GO:0008152;GO:0009058;GO:0009059;GO:0009889;GO:0009987;GO:0010468;GO:0010556;GO:0010608;GO:0019222;GO:0031323;GO:0031326;GO:0034248;GO:0043170;GO:0044237;GO:0044249;GO:0050789;GO:0050794;GO:0051171;GO:0051246;GO:0060255;GO:0065007;GO:0071704;GO:0080090;GO:1901576	GO:0000049;GO:0003676;GO:0003723;GO:0005488;GO:0097159	GO:0005634;GO:0005737;GO:0043226;GO:0043227;GO:0043229;GO:0043231;GO:0110165	153	169	19.0385	17.7598	18.6748	13.1496	18.9237	13.4717	15.2177	12.6291	19.7566	12.4572	19.6286	12.2512	13.0229	12.5554	18.273	12.6875	13.6338	11.8656	17.7332	18.7596	12.7002	12.7285	13.3526	12.3888	13.1685	11.7752	16.638	11.9191	13.6694	12.9095	12.197	12.2994	12.3677	13.325	13.9847
+	3.62671	1.30103	AALGASLAAARLLPLGR[54.0106]C[130.0791]SPSPAPR[54.0106]	sp|Q9BVL4|SELO_HUMAN	17R(54.0106),18C(130.0791),25R(54.0106)	Q9BVL4	SELO_HUMAN	SELENOO	Protein adenylyltransferase SelO, mitochondrial	GO:0006807;GO:0008152;GO:0018117;GO:0018175;GO:0019538;GO:0036211;GO:0043170;GO:0043412;GO:0044238;GO:0071704;GO:1901564	GO:0000166;GO:0003824;GO:0005488;GO:0005524;GO:0016740;GO:0016772;GO:0016779;GO:0017076;GO:0030554;GO:0032553;GO:0032555;GO:0032559;GO:0035639;GO:0036094;GO:0043167;GO:0043168;GO:0043169;GO:0046872;GO:0070566;GO:0070733;GO:0097159;GO:0097367;GO:1901265;GO:1901363	GO:0005694;GO:0005739;GO:0043226;GO:0043227;GO:0043228;GO:0043229;GO:0043231;GO:0043232;GO:0110165	6	30	13.3134	20.7453	12.8349	12.5998	19.9665	13.2868	13.4055	14.1309	13.3286	12.9064	13.2994	12.2462	13.6333	13.6164	13.5296	12.2208	11.9675	11.8599	13.299	14.6871	12.086	12.9582	17.592	13.1738	13.1991	12.4061	17.1649	12.1645	12.127	12.4494	13.4621	11.794	13.2067	12.6965	16.6519
+	6.31637	1.29733	K[54.0106]QLGSVATGSTLQQSLELK[54.0106]	sp|Q9BSJ2|GCP2_HUMAN	19K(54.0106),1K(54.0106)	Q9BSJ2	GCP2_HUMAN	TUBGCP2	Gamma-tubulin complex component 2	GO:0000226;GO:0000278;GO:0001764;GO:0006996;GO:0007010;GO:0007017;GO:0007020;GO:0007049;GO:0007051;GO:0007420;GO:0009987;GO:0016043;GO:0016477;GO:0022402;GO:0022414;GO:0022607;GO:0031122;GO:0032502;GO:0043933;GO:0048513;GO:0048856;GO:0048870;GO:0051225;GO:0051321;GO:0065003;GO:0070925;GO:0071840;GO:0097435;GO:0140694	GO:0005488;GO:0005515;GO:0008092;GO:0015631;GO:0043015	GO:0000922;GO:0000923;GO:0000930;GO:0005654;GO:0005813;GO:0005815;GO:0005829;GO:0005874;GO:0005881;GO:0016020;GO:0032991;GO:0099080;GO:0099081;GO:0099512;GO:0099513;GO:0110165	139	157	12.81	13.6121	12.5878	12.1121	13.3396	13.6404	12.4889	14.2215	13.7687	12.9533	12.9586	12.6295	13.2137	12.5145	13.6055	13.0315	13.5898	12.2284	12.3686	13.1671	10.8127	12.4933	14.1673	13.6604	16.0387	11.3785	14.0664	13.5036	12.2703	11.9392	13.2371	12.2367	12.7441	12.9456	13.5393
+	4.26507	1.29697	SLETLSSEQK[54.0106]	sp|Q9P2L0|WDR35_HUMAN	10K(54.0106)	Q9P2L0	WDR35_HUMAN	WDR35	WD repeat-containing protein 35	GO:0006810;GO:0006996;GO:0007017;GO:0007018;GO:0008104;GO:0009987;GO:0010033;GO:0010970;GO:0016043;GO:0022607;GO:0030030;GO:0030031;GO:0030705;GO:0031503;GO:0033036;GO:0033365;GO:0034097;GO:0035721;GO:0042073;GO:0042221;GO:0044782;GO:0046907;GO:0050896;GO:0051179;GO:0051234;GO:0051641;GO:0051649;GO:0051716;GO:0060271;GO:0061512;GO:0070727;GO:0070887;GO:0070925;GO:0071310;GO:0071345;GO:0071840;GO:…		GO:0005813;GO:0005815;GO:0005929;GO:0005930;GO:0030991;GO:0032991;GO:0036064;GO:0042995;GO:0043226;GO:0043227;GO:0097542;GO:0110165;GO:0120025	1093	1102	14.0896	18.9198	12.9206	13.4914	17.8081	14.0749	12.1106	12.3028	19.0737	12.3927	18.8373	12.6245	12.3064	12.2644	21.1216	12.5116	12.2678	11.9786	18.2644	13.5227	12.129	12.9856	12.9314	13.1112	14.8404	12.0256	15.5366	12.1466	15.4485	12.8656	13.3226	12.9634	18.284	11.7609	14.2685
+	4.452	1.29346	NLFPC[130.0791]GDSMVCIIDDR[54.0106]	sp|Q9Y5B0|CTDP1_HUMAN	16R(54.0106),5C(130.0791)	Q9Y5B0	CTDP1_HUMAN	CTDP1	RNA polymerase II subunit A C-terminal domain phosphatase	GO:0001558;GO:0006139;GO:0006354;GO:0006368;GO:0006470;GO:0006725;GO:0006793;GO:0006796;GO:0006807;GO:0008152;GO:0009058;GO:0009059;GO:0009987;GO:0010458;GO:0010611;GO:0010614;GO:0014741;GO:0014743;GO:0016070;GO:0016311;GO:0018130;GO:0019438;GO:0019538;GO:0022402;GO:0030308;GO:0032774;GO:0034641;GO:0034654;GO:0036211;GO:0040008;GO:0043170;GO:0043412;GO:0043502;GO:0043923;GO:0044057;GO:0044237;GO:…	GO:0001091;GO:0001096;GO:0001098;GO:0001099;GO:0003824;GO:0004721;GO:0004722;GO:0005488;GO:0005515;GO:0008134;GO:0008420;GO:0016787;GO:0016788;GO:0016791;GO:0017018;GO:0030957;GO:0042578;GO:0044877;GO:0061629;GO:0140096;GO:0140296;GO:0140297;GO:0140994	GO:0000922;GO:0005634;GO:0005654;GO:0005737;GO:0005813;GO:0005815;GO:0005819;GO:0030496;GO:0032991;GO:0043226;GO:0043227;GO:0043228;GO:0043229;GO:0043231;GO:0043232;GO:0051233;GO:0110165	289	304	12.3149	13.3681	12.9292	13.4248	13.3016	12.7733	14.7353	12.9636	13.478	13.4819	15.4841	12.6026	13.9439	12.0394	16.2042	12.5482	13.2883	10.7625	17.0907	13.2076	12.2765	14.5106	13.9214	19.6266	16.7335	13.8299	16.1855	11.2236	15.9008	18.3191	19.4216	12.1883	17.4955	11.2018	13.5006
+	4.95114	1.29341	ELAR[54.0106]K[54.0106]EQELTK[54.0106]	sp|Q13439|GOGA4_HUMAN	11K(54.0106),4R(54.0106),5K(54.0106)	Q13439	GOGA4_HUMAN	GOLGA4	Golgin subfamily A member 4	GO:0001558;GO:0006810;GO:0006892;GO:0006893;GO:0008104;GO:0009987;GO:0010720;GO:0010975;GO:0015031;GO:0016192;GO:0022603;GO:0030307;GO:0030516;GO:0031344;GO:0031346;GO:0033036;GO:0040008;GO:0043001;GO:0045184;GO:0045595;GO:0045597;GO:0045773;GO:0045927;GO:0048193;GO:0048518;GO:0048522;GO:0048638;GO:0048639;GO:0050767;GO:0050769;GO:0050770;GO:0050772;GO:0050789;GO:0050793;GO:0050794;GO:0051094;GO:…	GO:0005488;GO:0005515;GO:0019899;GO:0031267;GO:0051020	GO:0000139;GO:0005654;GO:0005737;GO:0005794;GO:0005802;GO:0005829;GO:0005886;GO:0016020;GO:0031090;GO:0031982;GO:0031984;GO:0043226;GO:0043227;GO:0043229;GO:0043230;GO:0043231;GO:0065010;GO:0070062;GO:0098588;GO:0098791;GO:0110165;GO:1903561	488	498	13.0236	12.9602	12.3538	12.1875	13.6855	12.1638	11.8048	12.3687	13.5104	12.7877	13.3658	13.6839	13.2466	13.3282	13.2891	12.3647	12.7404	12.2293	12.9971	11.6816	11.8986	13.5931	18.2083	11.8123	12.2744	11.8662	14.1579	12.8946	12.3098	13.6538	17.5405	11.7606	19.1453	12.4216	18.3037
+	4.29212	1.2924	FFESFGDLSTPDAVMGNPKVK[54.0106]AHGK[54.0106]K[54.0106]	sp|P68871|HBB_HUMAN	21K(54.0106),25K(54.0106),26K(54.0106)	P68871	HBB_HUMAN	HBB	Hemoglobin subunit beta	GO:0000302;GO:0003008;GO:0003013;GO:0003014;GO:0003018;GO:0006810;GO:0006950;GO:0006979;GO:0007155;GO:0008152;GO:0008217;GO:0009056;GO:0009889;GO:0009891;GO:0009893;GO:0009987;GO:0010033;GO:0010035;GO:0015669;GO:0015670;GO:0015671;GO:0019222;GO:0019755;GO:0030185;GO:0031323;GO:0031325;GO:0031326;GO:0031328;GO:0032501;GO:0034109;GO:0035150;GO:0035296;GO:0042221;GO:0042542;GO:0042743;GO:0042744;GO:…	GO:0005344;GO:0005488;GO:0005515;GO:0019825;GO:0020037;GO:0030492;GO:0031721;GO:0036094;GO:0043167;GO:0043169;GO:0043177;GO:0046872;GO:0046906;GO:0097159;GO:0140104	GO:0005576;GO:0005615;GO:0005829;GO:0005833;GO:0031838;GO:0031974;GO:0031982;GO:0032991;GO:0043226;GO:0043227;GO:0043230;GO:0043233;GO:0065010;GO:0070013;GO:0070062;GO:0071682;GO:0072562;GO:0110165;GO:1903561;GO:1904724;GO:1904813	42	67	10.7126	12.7878	12.101	14.0252	15.2369	13.0006	12.3554	13.3307	17.7577	14.4319	13.8632	13.3101	12.0301	12.8706	14.0062	12.592	12.1055	11.8284	12.765	14.8476	12.4904	12.9587	13.3393	12.5388	11.9316	12.8385	12.3094	12.4416	14.0446	13.3908	13.5377	12.633	14.382	12.6941	11.6717
+	2.64262	1.28965	NQLAR[54.0106]AVLNPNPMDFC[130.0791]TK[54.0106]DLLTTTSER	sp|Q7Z333|SETX_HUMAN	16C(130.0791),18K(54.0106),5R(54.0106)	Q7Z333	SETX_HUMAN	SETX	Probable helicase senataxin	GO:0000165;GO:0000302;GO:0003006;GO:0006139;GO:0006259;GO:0006281;GO:0006302;GO:0006310;GO:0006353;GO:0006355;GO:0006357;GO:0006369;GO:0006376;GO:0006396;GO:0006725;GO:0006807;GO:0006950;GO:0006974;GO:0006979;GO:0007165;GO:0007166;GO:0007167;GO:0007169;GO:0007276;GO:0007283;GO:0007399;GO:0007623;GO:0008152;GO:0008543;GO:0009058;GO:0009059;GO:0009719;GO:0009889;GO:0009891;GO:0009893;GO:0009987;GO:…	GO:0000166;GO:0000976;GO:0001067;GO:0001147;GO:0003676;GO:0003677;GO:0003678;GO:0003690;GO:0003723;GO:0003824;GO:0004386;GO:0005488;GO:0005515;GO:0005524;GO:0008094;GO:0016787;GO:0017076;GO:0030554;GO:0032553;GO:0032555;GO:0032559;GO:0035639;GO:0036094;GO:0042802;GO:0043167;GO:0043168;GO:0043565;GO:0097159;GO:0097367;GO:0140097;GO:0140640;GO:0140657;GO:1901265;GO:1901363;GO:1990837	GO:0000228;GO:0000781;GO:0005634;GO:0005654;GO:0005694;GO:0005730;GO:0005737;GO:0016604;GO:0030424;GO:0030426;GO:0030427;GO:0042995;GO:0043005;GO:0043226;GO:0043227;GO:0043228;GO:0043229;GO:0043231;GO:0043232;GO:0045171;GO:0098687;GO:0110165;GO:0120025	1900	1926	19.1762	19.36	19.2658	18.2205	19.4646	18.2898	20.3615	19.3008	19.3445	18.995	19.1586	18.4988	17.1752	16.5125	19.1631	17.7198	18.4291	17.571	19.6371	20.9585	11.3876	19.2472	18.6129	19.114	18.6693	16.3077	18.6529	18.3885	18.8843	19.1997	19.0356	17.883	19.8543	18.2074	19.235
+	5.82389	1.28873	LDHSMC[125.0477]IIPWPVTCASEK[54.0106]	sp|Q7Z6M1|RABEK_HUMAN	18K(54.0106),6C(125.0477)	Q7Z6M1	RABEK_HUMAN	RABEPK	Rab9 effector protein with kelch motifs	GO:0006810;GO:0006897;GO:0006898;GO:0006904;GO:0009987;GO:0016192;GO:0022406;GO:0048278;GO:0051179;GO:0051234;GO:0051640;GO:0098657;GO:0140029;GO:0140056		GO:0005768;GO:0005829;GO:0010008;GO:0012506;GO:0016020;GO:0030133;GO:0030659;GO:0031090;GO:0031410;GO:0031982;GO:0032588;GO:0043226;GO:0043227;GO:0043229;GO:0043231;GO:0097708;GO:0098588;GO:0110165	294	311	13.5219	12.15	13.7402	13.1262	12.797	14.2236	12.341	12.978	13.1071	12.7564	13.7328	12.5421	13.885	12.5495	17.5596	12.8031	17.7302	12.2871	17.6231	15.0702	12.8235	13.0909	12.9369	11.326	17.5018	12.6079	13.4979	12.5851	12.7578	12.7516	12.4395	15.8993	12.8572	13.221	13.5563
+	4.8348	1.28574	GDMDVSVPK[54.0106]VEGEMK[54.0106]	sp|Q09666|AHNK_HUMAN	15K(54.0106),9K(54.0106)	Q09666	AHNK_HUMAN	AHNAK	Neuroblast differentiation-associated protein AHNAK	GO:0009889;GO:0010468;GO:0010556;GO:0010959;GO:0019219;GO:0019222;GO:0022898;GO:0031323;GO:0031326;GO:0032409;GO:0032412;GO:0032879;GO:0034762;GO:0034765;GO:0043269;GO:0043484;GO:0048518;GO:0048522;GO:0050789;GO:0050794;GO:0051049;GO:0051128;GO:0051130;GO:0051171;GO:0051252;GO:0051924;GO:0060255;GO:0065007;GO:0065009;GO:0080090;GO:1901019;GO:1901385;GO:1903169;GO:1903729;GO:1904062;GO:1905684;GO:…	GO:0003676;GO:0003723;GO:0005198;GO:0005488;GO:0005515;GO:0042802;GO:0044548;GO:0045296;GO:0050839;GO:0097159;GO:0097493	GO:0005634;GO:0005737;GO:0005765;GO:0005774;GO:0005829;GO:0005856;GO:0005886;GO:0005911;GO:0005925;GO:0015629;GO:0016020;GO:0030054;GO:0030055;GO:0030315;GO:0031090;GO:0031982;GO:0032991;GO:0042383;GO:0043034;GO:0043226;GO:0043227;GO:0043228;GO:0043229;GO:0043230;GO:0043231;GO:0043232;GO:0044291;GO:0065010;GO:0070062;GO:0070161;GO:0098588;GO:0098796;GO:0098797;GO:0098852;GO:0110165;GO:1903561	1669	1683	12.1654	12.8242	13.2416	11.1794	14.7787	12.4995	13.2387	13.2374	13.7897	13.9551	14.0084	14.4288	13.4792	13.7224	13.1094	12.2551	11.7514	11.0484	12.4016	14.5107	12.6128	13.6	12.3563	13.0263	13.2734	12.6494	11.8695	12.8183	11.6633	13.9852	12.2553	13.1221	13.0528	11.36	12.9094
+	3.63326	1.28538	KM[15.9949]TTSTDHLKR[54.0106]GTILDC[125.0477]NTCK	sp|P56199|ITA1_HUMAN	11R(54.0106),17C(125.0477),2M(15.9949)	P56199	ITA1_HUMAN	ITGA1	Integrin alpha-1	GO:0002376;GO:0003008;GO:0003013;GO:0003018;GO:0006935;GO:0007155;GO:0007160;GO:0007165;GO:0007166;GO:0007229;GO:0008285;GO:0009653;GO:0009893;GO:0009966;GO:0009967;GO:0009968;GO:0009987;GO:0010562;GO:0010604;GO:0010646;GO:0010647;GO:0010648;GO:0010921;GO:0010922;GO:0016043;GO:0016477;GO:0019220;GO:0019222;GO:0023051;GO:0023056;GO:0023057;GO:0030030;GO:0030593;GO:0030595;GO:0031323;GO:0031325;GO:…	GO:0005102;GO:0005178;GO:0005488;GO:0005515;GO:0005518;GO:0019899;GO:0019902;GO:0019903;GO:0043167;GO:0043169;GO:0044877;GO:0046872;GO:0050839;GO:0098631;GO:0098634;GO:0098639	GO:0001669;GO:0005886;GO:0005925;GO:0008305;GO:0009897;GO:0009986;GO:0016020;GO:0030054;GO:0030055;GO:0030141;GO:0031410;GO:0031982;GO:0032991;GO:0034665;GO:0043204;GO:0043226;GO:0043227;GO:0043229;GO:0043230;GO:0043231;GO:0043235;GO:0045178;GO:0065010;GO:0070062;GO:0070161;GO:0097708;GO:0098552;GO:0098636;GO:0098796;GO:0098797;GO:0098802;GO:0099503;GO:0110165;GO:1903561	1046	1066	12.6497	13.8747	13.5426	12.8888	13.8276	13.5052	12.7883	12.0332	12.7411	13.4336	13.7277	12.616	12.7491	12.9821	12.5108	12.7204	12.798	12.4026	13.2062	13.846	12.4855	13.5513	14.1643	11.4118	18.448	12.0457	12.8532	12.4882	12.8106	12.9662	12.7067	12.6778	12.4954	12.9113	13.6863
+	4.64485	1.28477	VKDM[15.9949]AGDWHWALR[54.0106]	sp|Q9H2V7|SPNS1_HUMAN	13R(54.0106),4M(15.9949)	Q9H2V7	SPNS1_HUMAN	SPNS1	Protein spinster homolog 1	GO:0006810;GO:0006869;GO:0006873;GO:0006885;GO:0015748;GO:0015914;GO:0019725;GO:0030003;GO:0030641;GO:0033700;GO:0035751;GO:0042592;GO:0048878;GO:0050801;GO:0051179;GO:0051234;GO:0051453;GO:0051977;GO:0055080;GO:0055082;GO:0065007;GO:0065008;GO:0071702;GO:1901264	GO:0005215;GO:0022857	GO:0005743;GO:0005765;GO:0005774;GO:0016020;GO:0019866;GO:0031090;GO:0031966;GO:0098588;GO:0098852;GO:0110165	209	221	13.402	13.8316	12.4605	13.0792	15.4012	13.1065	13.0973	13.8023	15.7134	12.9731	13.1881	15.9887	12.8396	13.3363	16.4831	12.3798	13.1629	12.676	14.1926	15.7965	12.2468	13.6232	14.0423	12.9033	12.452	12.0824	13.6664	11.6322	11.0453	12.2145	16.6593	12.1765	19.1402	12.4984	13.1887
+	5.63652	1.28449	QLRQEVVVCM[15.9949]R[54.0106]RDTALETALNAK[54.0106]	sp|P51532|SMCA4_HUMAN	10M(15.9949),11R(54.0106),23K(54.0106)	P51532	SMCA4_HUMAN	SMARCA4	Transcription activator BRG1	GO:0000122;GO:0001188;GO:0001558;GO:0002682;GO:0002684;GO:0002694;GO:0002696;GO:0003407;GO:0006282;GO:0006325;GO:0006337;GO:0006338;GO:0006355;GO:0006356;GO:0006357;GO:0007346;GO:0007399;GO:0008284;GO:0009889;GO:0009890;GO:0009891;GO:0009892;GO:0009893;GO:0009966;GO:0009967;GO:0009968;GO:0009987;GO:0010468;GO:0010556;GO:0010557;GO:0010558;GO:0010564;GO:0010604;GO:0010605;GO:0010646;GO:0010647;GO:…	GO:0000166;GO:0001221;GO:0002039;GO:0003676;GO:0003677;GO:0003712;GO:0003713;GO:0003714;GO:0003723;GO:0003824;GO:0004386;GO:0005488;GO:0005515;GO:0005524;GO:0008094;GO:0008134;GO:0016787;GO:0016922;GO:0017076;GO:0019899;GO:0030554;GO:0030957;GO:0032553;GO:0032555;GO:0032559;GO:0035639;GO:0036094;GO:0042393;GO:0043167;GO:0043168;GO:0050681;GO:0061629;GO:0070182;GO:0070577;GO:0097159;GO:0097367;GO:…	GO:0000776;GO:0000785;GO:0001650;GO:0005615;GO:0005634;GO:0005654;GO:0005730;GO:0016020;GO:0016363;GO:0016514;GO:0016586;GO:0032991;GO:0032993;GO:0043226;GO:0043227;GO:0043228;GO:0043229;GO:0043231;GO:0043232;GO:0070603;GO:0071564;GO:0071565;GO:0099080;GO:0110165;GO:0140092;GO:0140288;GO:0140513;GO:1902494;GO:1904949	415	437	12.7929	12.8103	13.3984	13.2321	14.2226	13.1258	13.1141	12.7315	13.86	13.1603	13.4305	12.0523	13.1672	12.7076	17.104	12.6046	12.4839	12.3178	13.1833	13.8815	13.083	13.104	13.2942	12.1684	12.333	12.8629	12.5753	12.1109	11.5605	13.8985	12.9873	12.1839	19.2598	11.7522	13.6855
+	5.16999	1.28327	M[15.9949]EEVSGTK[54.0106]GR	sp|P06213|INSR_HUMAN	1M(15.9949),8K(54.0106)	P06213	INSR_HUMAN	INSR	Insulin receptor	GO:0001932;GO:0001934;GO:0002090;GO:0002092;GO:0003006;GO:0003007;GO:0003008;GO:0003013;GO:0003018;GO:0005975;GO:0005979;GO:0006109;GO:0006110;GO:0006140;GO:0006355;GO:0006468;GO:0006793;GO:0006796;GO:0006807;GO:0006810;GO:0006897;GO:0006898;GO:0007088;GO:0007165;GO:0007166;GO:0007167;GO:0007169;GO:0007186;GO:0007346;GO:0007530;GO:0007610;GO:0007611;GO:0007612;GO:0007613;GO:0008152;GO:0008284;GO:…	GO:0000166;GO:0001540;GO:0003824;GO:0004672;GO:0004713;GO:0004714;GO:0004888;GO:0005009;GO:0005102;GO:0005159;GO:0005488;GO:0005515;GO:0005520;GO:0005524;GO:0005525;GO:0016301;GO:0016500;GO:0016740;GO:0016772;GO:0016773;GO:0017046;GO:0017076;GO:0019001;GO:0019199;GO:0019838;GO:0019904;GO:0030554;GO:0031994;GO:0031995;GO:0032553;GO:0032555;GO:0032559;GO:0032561;GO:0033218;GO:0035639;GO:0036094;GO:…	GO:0000323;GO:0005764;GO:0005768;GO:0005770;GO:0005773;GO:0005886;GO:0005899;GO:0005901;GO:0009897;GO:0010008;GO:0012506;GO:0016020;GO:0030424;GO:0030659;GO:0031090;GO:0031253;GO:0031256;GO:0031410;GO:0031982;GO:0032589;GO:0032590;GO:0032809;GO:0032991;GO:0042995;GO:0043005;GO:0043226;GO:0043227;GO:0043229;GO:0043230;GO:0043231;GO:0043235;GO:0044298;GO:0044853;GO:0045121;GO:0061695;GO:0065010;GO:…	469	478	16.4199	17.1055	16.4667	16.0695	17.7151	16.7585	17.3994	16.4512	17.7896	15.9011	16.937	15.8148	15.161	12.8224	17.1917	15.1985	15.9494	11.8604	17.3284	18.5744	12.1028	16.5294	16.7467	16.9528	16.291	11.9886	17.2996	15.8098	16.7888	16.5628	12.9271	15.0099	17.7469	14.6611	16.8541
+	5.04176	1.28318	ETLNGPAGGGAPDAK[54.0106]	sp|Q9Y4B5|MTCL1_HUMAN	15K(54.0106)	Q9Y4B5	MTCL1_HUMAN	MTCL1	Microtubule cross-linking factor 1	GO:0000226;GO:0001578;GO:0006996;GO:0007010;GO:0007017;GO:0007163;GO:0009894;GO:0009987;GO:0010506;GO:0016043;GO:0019222;GO:0031323;GO:0031329;GO:0032879;GO:0032880;GO:0035088;GO:0045197;GO:0048518;GO:0048522;GO:0050789;GO:0050794;GO:0060341;GO:0061245;GO:0065007;GO:0070201;GO:0071840;GO:0090313;GO:0090314;GO:1903533;GO:1903829;GO:1904951;GO:1905475;GO:1905477	GO:0003676;GO:0003723;GO:0005488;GO:0005515;GO:0008017;GO:0008092;GO:0015631;GO:0042802;GO:0042803;GO:0046983;GO:0097159	GO:0000922;GO:0005615;GO:0005737;GO:0005856;GO:0016020;GO:0016324;GO:0016327;GO:0016328;GO:0030496;GO:0043226;GO:0043228;GO:0043229;GO:0043232;GO:0097427;GO:0098590;GO:0110165	2	16	12.3355	13.051	12.4985	13.0752	13.9445	13.4009	13.2735	11.8305	14.1914	12.4632	11.8632	13.2992	13.0622	12.559	13.8941	12.4959	11.9544	11.5758	12.2058	14.5537	12.4659	13.1363	13.6867	13.4451	15.9625	12.6793	13.2308	13.3131	12.4996	11.365	13.4778	12.7862	12.8795	13.2324	13.41
+	4.74969	1.28077	R[54.0106]FC[130.0791]VGLQK[54.0106]IEEIFKK	sp|P06732|KCRM_HUMAN	1R(54.0106),3C(130.0791),8K(54.0106)	P06732	KCRM_HUMAN	CKM	Creatine kinase M-type	GO:0006575;GO:0006599;GO:0006603;GO:0006793;GO:0006796;GO:0006807;GO:0008152;GO:0009058;GO:0009987;GO:0016310;GO:0019637;GO:0042396;GO:0042398;GO:0044237;GO:0046314;GO:0071704;GO:0090407;GO:1901564;GO:1901566;GO:1901576	GO:0000166;GO:0003824;GO:0004111;GO:0005488;GO:0005524;GO:0016301;GO:0016740;GO:0016772;GO:0016775;GO:0017076;GO:0030554;GO:0032553;GO:0032555;GO:0032559;GO:0035639;GO:0036094;GO:0043167;GO:0043168;GO:0097159;GO:0097367;GO:1901265;GO:1901363	GO:0005615;GO:0005829;GO:0110165	252	266	15.4838	16.9028	12.9551	12.8156	16.9525	13.3551	18.7259	13.1806	17.1743	12.959	16.8491	13.1995	14.3601	12.7882	16.6291	13.0996	13.1429	13.0407	17.9239	17.4991	12.578	14.2189	13.794	11.8657	12.1528	11.4743	17.5756	13.0248	12.0878	13.3801	12.0365	12.8828	13.6758	11.9573	12.5368
+	5.20035	1.2796	RNYGGVYVGLPSEAVNMVSSQTK[54.0106]	sp|Q8TAD7|OCC1_HUMAN	23K(54.0106)	Q8TAD7	OCC1_HUMAN	OCC1	Overexpressed in colon carcinoma 1 protein				36	58	13.8502	13.9844	12.9497	13.7184	13.013	13.7003	12.2024	12.4796	13.9996	12.9681	12.5468	13.273	13.2446	11.7194	13.7235	13.1131	12.7772	11.3248	12.745	13.7856	10.7335	12.5604	19.1906	13.1056	12.4528	12.3378	13.8057	12.8165	13.1417	12.8876	18.5324	12.0356	18.7202	12.357	16.2947
+	8.58508	1.27856	VANTFK[54.0106]PHRLQARK	sp|Q8IUC6|TCAM1_HUMAN	6K(54.0106)	Q8IUC6	TCAM1_HUMAN	TICAM1	TIR domain-containing adapter molecule 1	GO:0001775;GO:0001817;GO:0001819;GO:0002218;GO:0002221;GO:0002224;GO:0002237;GO:0002252;GO:0002253;GO:0002263;GO:0002274;GO:0002281;GO:0002366;GO:0002376;GO:0002682;GO:0002684;GO:0002694;GO:0002696;GO:0002697;GO:0002699;GO:0002700;GO:0002702;GO:0002703;GO:0002705;GO:0002718;GO:0002720;GO:0002730;GO:0002732;GO:0002733;GO:0002735;GO:0002753;GO:0002756;GO:0002757;GO:0002758;GO:0002764;GO:0002831;GO:…	GO:0005488;GO:0005515;GO:0019899;GO:0019900;GO:0019901;GO:0060090	GO:0005739;GO:0005768;GO:0005769;GO:0005773;GO:0005776;GO:0005829;GO:0010008;GO:0012506;GO:0016020;GO:0030659;GO:0031090;GO:0031410;GO:0031982;GO:0032991;GO:0043226;GO:0043227;GO:0043229;GO:0043231;GO:0097342;GO:0097708;GO:0098588;GO:0110165;GO:1902494	524	537	13.6645	13.961	15.5567	13.8235	13.5545	13.7263	13.3246	12.514	13.7122	13.1908	12.7766	13.2146	12.8519	12.6516	12.8914	12.2718	12.8289	12.0118	13.3185	13.4412	12.1114	13.2185	13.4993	14.2772	15.4065	12.2056	13.1949	12.5705	15.3875	13.1664	13.0529	12.7196	12.8796	12.4152	12.7575
+	6.97644	1.27737	TYGESMLYLDGQRHFNSMSGPATLR[54.0106]	sp|Q9Y305|ACOT9_HUMAN	25R(54.0106)	Q9Y305	ACOT9_HUMAN	ACOT9	Acyl-coenzyme A thioesterase 9, mitochondrial	GO:0006139;GO:0006163;GO:0006637;GO:0006725;GO:0006753;GO:0006790;GO:0006793;GO:0006796;GO:0006807;GO:0008152;GO:0009117;GO:0009150;GO:0009259;GO:0009987;GO:0019637;GO:0019693;GO:0033865;GO:0033875;GO:0034032;GO:0034641;GO:0035383;GO:0043603;GO:0044237;GO:0044238;GO:0044281;GO:0046483;GO:0055086;GO:0071704;GO:0072521;GO:1901135;GO:1901360;GO:1901564	GO:0003824;GO:0003986;GO:0016289;GO:0016290;GO:0016787;GO:0016788;GO:0016790;GO:0047617;GO:0052689	GO:0005739;GO:0005759;GO:0031974;GO:0043226;GO:0043227;GO:0043229;GO:0043231;GO:0043233;GO:0070013;GO:0110165	408	432	13.0319	14.0793	16.9039	12.5171	13.0949	12.7677	14.2958	14.3461	13.2357	13.8486	14.5358	13.8222	13.0614	12.8303	12.7896	11.737	12.7419	11.722	13.6865	14.3846	12.6652	12.7097	14.1955	13.3583	14.8611	11.907	14.0065	11.9727	16.1813	12.9865	12.5946	12.2472	12.9887	11.9362	12.9762
+	7.36545	1.27575	DIQTINPLDVLC[130.0791]ATMLC[130.0791]SDSSLQR[54.0106]	sp|Q9BX69|CARD6_HUMAN	12C(130.0791),17C(130.0791),24R(54.0106)	Q9BX69	CARD6_HUMAN	CARD6	Caspase recruitment domain-containing protein 6	GO:0006915;GO:0008219;GO:0009987;GO:0012501;GO:0042981;GO:0043067;GO:0050789;GO:0050794;GO:0065007			369	392	11.8622	14.0327	14.7945	13.3181	13.3891	13.1614	13.1268	12.5919	15.3003	13.5219	13.8804	13.4192	13.3055	12.1716	12.2162	11.5815	15.5066	12.8096	15.5504	13.8478	11.9583	12.3293	12.2092	13.2525	15.3876	12.4342	12.9535	12.1299	12.0108	11.8512	15.0111	12.9792	16.4239	13.6852	12.2433
+	7.00436	1.27504	VLGAFSDGLAHLDNLK[54.0106]GTFSQLSELHC[125.0477]DK[54.0106]LHVDPENFR	sp|P02042|HBD_HUMAN	16K(54.0106),27C(125.0477),29K(54.0106)	P02042	HBD_HUMAN	HBD	Hemoglobin subunit delta	GO:0006810;GO:0008152;GO:0009056;GO:0009987;GO:0015669;GO:0015670;GO:0015671;GO:0019755;GO:0042743;GO:0042744;GO:0044237;GO:0044248;GO:0051179;GO:0051234;GO:0071702;GO:0071704;GO:0072593;GO:0098754;GO:0098869;GO:1901575;GO:1990748	GO:0005344;GO:0005488;GO:0005515;GO:0019825;GO:0020037;GO:0030492;GO:0031721;GO:0036094;GO:0043167;GO:0043169;GO:0043177;GO:0046872;GO:0046906;GO:0097159;GO:0140104	GO:0005829;GO:0005833;GO:0031838;GO:0032991;GO:0072562;GO:0110165	68	105	15.4871	16.5683	14.9526	13.3064	15.4515	15.7994	14.8505	14.7292	16.1209	13.3723	15.8799	12.8289	14.2927	11.5059	15.3592	11.8566	14.9105	11.9238	12.9493	16.9469	13.8309	14.7491	14.6241	11.8669	14.5595	10.97	13.7914	11.6434	15.4251	12.924	14.7338	13.5794	16.6963	12.1837	14.9535
+	5.11389	1.2732	DGGLIC[125.0477]TSC[130.0791]R[54.0106]DK	sp|P31146|COR1A_HUMAN	10R(54.0106),6C(125.0477),9C(130.0791)	P31146	COR1A_HUMAN	CORO1A	Coronin-1A	GO:0001667;GO:0001775;GO:0001776;GO:0001845;GO:0001894;GO:0002252;GO:0002260;GO:0002376;GO:0002682;GO:0002684;GO:0002685;GO:0002687;GO:0002694;GO:0002696;GO:0006810;GO:0006811;GO:0006812;GO:0006816;GO:0006887;GO:0006897;GO:0006906;GO:0006909;GO:0006915;GO:0006935;GO:0006950;GO:0006952;GO:0006955;GO:0006996;GO:0007010;GO:0007015;GO:0007033;GO:0007040;GO:0007155;GO:0007165;GO:0007166;GO:0008064;GO:…	GO:0003676;GO:0003723;GO:0003779;GO:0003785;GO:0005488;GO:0005515;GO:0008092;GO:0017022;GO:0032036;GO:0042802;GO:0042803;GO:0043548;GO:0044877;GO:0046983;GO:0051015;GO:0097159	GO:0001772;GO:0001891;GO:0005737;GO:0005768;GO:0005769;GO:0005829;GO:0005856;GO:0005884;GO:0005886;GO:0005911;GO:0012506;GO:0016020;GO:0030027;GO:0030054;GO:0030139;GO:0030424;GO:0030659;GO:0030666;GO:0030670;GO:0030863;GO:0030864;GO:0031090;GO:0031410;GO:0031982;GO:0032991;GO:0042995;GO:0043005;GO:0043226;GO:0043227;GO:0043228;GO:0043229;GO:0043230;GO:0043231;GO:0043232;GO:0045202;GO:0045335;GO:…	187	198	12.8411	13.5057	12.7605	12.5833	13.2153	12.2548	12.6733	12.8204	12.6536	13.2096	13.3651	12.4637	12.8266	12.3031	17.0949	12.5347	13.4045	12.3746	13.0306	18.4486	13.1344	12.4391	15.2485	12.8176	12.1333	11.9285	12.6984	12.5729	11.9753	13.5084	12.3135	12.447	17.7358	11.6546	12.9337
+	3.50768	1.27302	K[54.0106]FGK[54.0106]VTSVQIHGTSEER	sp|Q96T58|MINT_HUMAN	1K(54.0106),4K(54.0106)	Q96T58	MINT_HUMAN	SPEN	Msx2-interacting protein	GO:0000122;GO:0006355;GO:0006357;GO:0007165;GO:0007166;GO:0007219;GO:0009889;GO:0009890;GO:0009892;GO:0009987;GO:0010468;GO:0010556;GO:0010558;GO:0010605;GO:0010720;GO:0019219;GO:0019222;GO:0031323;GO:0031324;GO:0031326;GO:0031327;GO:0045595;GO:0045597;GO:0045892;GO:0045934;GO:0048518;GO:0048519;GO:0048522;GO:0048523;GO:0050767;GO:0050769;GO:0050789;GO:0050793;GO:0050794;GO:0051094;GO:0051171;GO:…	GO:0003676;GO:0003677;GO:0003712;GO:0003714;GO:0003723;GO:0003729;GO:0005488;GO:0005515;GO:0008134;GO:0061629;GO:0097159;GO:0140110;GO:0140297	GO:0005634;GO:0005654;GO:0005667;GO:0017053;GO:0031982;GO:0032991;GO:0043226;GO:0043227;GO:0043229;GO:0043230;GO:0043231;GO:0065010;GO:0070062;GO:0110165;GO:1903561	361	377	13.3753	14.9587	19.363	14.144	13.2684	13.8455	12.4998	13.3919	13.4376	12.499	13.0536	12.8954	12.7453	11.8026	11.7754	12.4651	18.3046	12.1635	11.8181	13.1438	12.0464	12.8723	19.2964	12.8792	11.5426	11.8629	13.3877	13.5095	13.4683	12.6327	12.2489	12.4669	12.0569	11.5621	19.9339
+	6.28249	1.2711	AIVNVIGM[15.9949]HK[54.0106]M[15.9949]TPPIK	sp|O75533|SF3B1_HUMAN	10K(54.0106),11M(15.9949),8M(15.9949)	O75533	SF3B1_HUMAN	SF3B1	Splicing factor 3B subunit 1	GO:0000245;GO:0000375;GO:0000377;GO:0000398;GO:0006139;GO:0006325;GO:0006338;GO:0006355;GO:0006356;GO:0006357;GO:0006359;GO:0006396;GO:0006397;GO:0006725;GO:0006807;GO:0008152;GO:0008380;GO:0009889;GO:0009891;GO:0009893;GO:0009987;GO:0010468;GO:0010556;GO:0010557;GO:0010604;GO:0016043;GO:0016070;GO:0016071;GO:0019219;GO:0019222;GO:0022607;GO:0022618;GO:0031056;GO:0031323;GO:0031325;GO:0031326;GO:…	GO:0003676;GO:0003723;GO:0003729;GO:0005488;GO:0005515;GO:0097159;GO:1990935	GO:0005634;GO:0005654;GO:0005681;GO:0005684;GO:0005686;GO:0005689;GO:0005730;GO:0016604;GO:0016607;GO:0030532;GO:0032991;GO:0034693;GO:0043226;GO:0043227;GO:0043228;GO:0043229;GO:0043231;GO:0043232;GO:0070603;GO:0071004;GO:0071005;GO:0071010;GO:0071011;GO:0071013;GO:0097525;GO:0110016;GO:0110165;GO:0120114;GO:0140513;GO:1902494;GO:1904949;GO:1990904	999	1014	14.6905	13.4485	15.0531	15.3853	16.2163	14.0333	16.0176	12.4567	15.675	13.0946	15.1855	14.8548	12.8122	12.3003	12.405	12.3679	13.2751	11.6778	12.375	16.7077	13.0051	13.8896	13.4988	12.8444	16.4695	12.1606	15.2545	14.3219	14.8023	15.6615	13.4351	11.1598	13.4761	13.5783	15.2052
+	5.81834	1.27078	EVAVVMPTLAR[54.0106]	sp|Q5T0Z8|CF132_HUMAN	11R(54.0106)	Q5T0Z8	CF132_HUMAN	C6orf132	Uncharacterized protein C6orf132				781	791	14.1096	12.9295	12.1461	13.4154	16.4038	12.8468	16.9155	12.9269	14.6632	12.6637	13.4732	12.9461	14.089	12.692	15.6896	13.2395	13.2162	13.0917	16.0404	16.5259	12.1035	14.1489	12.7768	12.0852	13.0739	12.6639	15.4808	12.7125	13.1354	11.4086	12.3429	13.3884	15.8369	12.4818	14.1365
[truncated: 2,890 more rows]
[truncated: 105 more columns]
