# Supplementary material for: Active Oxidative Metabolism and Impaired Glyoxalase System Under Increased Intracellular Oxidative Stress in Non-Small Cell Lung Cancer
Source: Research Square preprint supplement (doi:10.21203/rs.3.rs-4535848/v1), 2024-06-19
Supplement: Supplementary file 3 [file 983e9632fb30b8721e8673e9.xlsx]

## Sheet: GOCC_moreOx_Healthy
Term ID	Term description	Observed gene count	Background gene count	Genes (%)	Strength	FDR	Matching proteins (IDs)	Matching proteins (labels)
GO:0005589	Collagen type VI trimer	2	2	100	1.97	0.0113	9606.ENSP00000295550,9606.ENSP00000355180	COL6A3,COL6A1
GO:0005853	Eukaryotic translation elongation factor 1 complex	3	4	75	1.84	0.00095	9606.ENSP00000339063,9606.ENSP00000376055,9606.ENSP00000410059	EEF1A1,EEF1B2,EEF1D
GO:0034668	Integrin alpha4-beta1 complex	2	3	66.6667	1.79	0.0178	9606.ENSP00000369677,9606.ENSP00000379350	EMILIN1,ITGB1
GO:0005577	Fibrinogen complex	4	8	50	1.67	0.00016	9606.ENSP00000306099,9606.ENSP00000321853,9606.ENSP00000336829,9606.ENSP00000498441	FGB,SERPINF2,FGG,FGA
GO:0046696	Lipopolysaccharide receptor complex	2	5	40	1.57	0.0342	9606.ENSP00000340019,9606.ENSP00000385519	HSPD1,CD14
GO:0097013	Phagocytic vesicle lumen	2	5	40	1.57	0.0342	9606.ENSP00000225275,9606.ENSP00000231751	MPO,LTF
GO:0008091	Spectrin	3	9	33.3333	1.49	0.0049	9606.ENSP00000349259,9606.ENSP00000487444,9606.ENSP00000495214	SPTBN1,SPTAN1,SPTA1
GO:0060473	Cortical granule	2	6	33.3333	1.49	0.0425	9606.ENSP00000216181,9606.ENSP00000320866	MYH9,CALR
GO:0030126	COPI vesicle coat	3	13	23.0769	1.33	0.0104	9606.ENSP00000325002,9606.ENSP00000329419,9606.ENSP00000469035	COPG1,COPB2,COPE
GO:0072562	Blood microparticle	26	118	22.0339	1.31	1.55e-22	9606.ENSP00000245907,9606.ENSP00000259396,9606.ENSP00000262418,9606.ENSP00000263408,9606.ENSP00000264613,9606.ENSP00000265132,9606.ENSP00000265983,9606.ENSP00000286713,9606.ENSP00000295897,9606.ENSP00000306099,9606.ENSP00000308541,9606.ENSP00000321853,9606.ENSP00000323929,9606.ENSP00000336829,9606.ENSP00000348170,9606.ENSP00000356399,9606.ENSP00000356969,9606.ENSP00000364802,9606.ENSP00000364935,…	C3,ORM1,SLC4A1,C9,CP,AMBP,HPX,STOM,ALB,FGB,F2,SERPINF2,A2M,FGG,HP,CFH,APOA2,HSPA1A,CLIC1,TF,CFB,DNPEP,HSPA8,JCHAIN,C1R,FGA
GO:0071682	Endocytic vesicle lumen	5	23	21.7391	1.31	0.00027	9606.ENSP00000225275,9606.ENSP00000231751,9606.ENSP00000265983,9606.ENSP00000320866,9606.ENSP00000348170	MPO,LTF,HPX,CALR,HP
GO:0031093	Platelet alpha granule lumen	11	66	16.6667	1.19	2.99e-08	9606.ENSP00000252699,9606.ENSP00000259396,9606.ENSP00000295897,9606.ENSP00000296028,9606.ENSP00000306099,9606.ENSP00000321853,9606.ENSP00000323929,9606.ENSP00000336829,9606.ENSP00000377941,9606.ENSP00000496166,9606.ENSP00000498441	ACTN4,ORM1,ALB,PPBP,FGB,SERPINF2,A2M,FGG,ACTN1,ALDOA,FGA
GO:0016460	Myosin II complex	4	26	15.3846	1.16	0.0054	9606.ENSP00000216181,9606.ENSP00000379616,9606.ENSP00000384330,9606.ENSP00000446955	MYH9,MYH11,MYH8,MYL6
GO:1905370	Serine-type endopeptidase complex	4	26	15.3846	1.16	0.0054	9606.ENSP00000245907,9606.ENSP00000264690,9606.ENSP00000308541,9606.ENSP00000356399	C3,KLKB1,F2,CFH
GO:0032432	Actin filament bundle	11	74	14.8649	1.14	7.62e-08	9606.ENSP00000216181,9606.ENSP00000252699,9606.ENSP00000267257,9606.ENSP00000324422,9606.ENSP00000348163,9606.ENSP00000358081,9606.ENSP00000360305,9606.ENSP00000377941,9606.ENSP00000381581,9606.ENSP00000422896,9606.ENSP00000456436	MYH9,ACTN4,PXN,ZYX,PLS3,BAG3,PDLIM1,ACTN1,LCP1,SEPTIN11,CNN2
GO:0031362	Anchored component of external side of plasma membrane	3	20	15	1.14	0.0273	9606.ENSP00000298223,9606.ENSP00000377284,9606.ENSP00000385519	FOLR2,FOLR1,CD14
GO:1904724	Tertiary granule lumen	8	55	14.5455	1.13	1.24e-05	9606.ENSP00000231751,9606.ENSP00000259396,9606.ENSP00000296028,9606.ENSP00000348170,9606.ENSP00000377696,9606.ENSP00000456436,9606.ENSP00000487444,9606.ENSP00000496166	LTF,ORM1,PPBP,HP,NIT2,CNN2,SPTAN1,ALDOA
GO:0101031	Chaperone complex	6	41	14.6341	1.13	0.00027	9606.ENSP00000280326,9606.ENSP00000358081,9606.ENSP00000360609,9606.ENSP00000377958,9606.ENSP00000437125,9606.ENSP00000482075	CCT5,BAG3,HSP90AB1,CCT4,HSPA8,PTGES3
GO:0030120	Vesicle coat	8	57	14.0351	1.12	1.44e-05	9606.ENSP00000325002,9606.ENSP00000329419,9606.ENSP00000338844,9606.ENSP00000362807,9606.ENSP00000377148,9606.ENSP00000469035,9606.ENSP00000479606,9606.ENSP00000483185	COPG1,COPB2,SEC23B,PEF1,AP1G1,COPE,CLTC,AP2B1
GO:0001725	Stress fiber	9	65	13.8462	1.11	3.76e-06	9606.ENSP00000216181,9606.ENSP00000252699,9606.ENSP00000267257,9606.ENSP00000324422,9606.ENSP00000358081,9606.ENSP00000360305,9606.ENSP00000377941,9606.ENSP00000422896,9606.ENSP00000456436	MYH9,ACTN4,PXN,ZYX,BAG3,PDLIM1,ACTN1,SEPTIN11,CNN2
GO:0042470	Melanosome	14	109	12.844	1.08	3.59e-09	9606.ENSP00000286713,9606.ENSP00000300289,9606.ENSP00000333298,9606.ENSP00000345672,9606.ENSP00000346032,9606.ENSP00000346550,9606.ENSP00000346762,9606.ENSP00000360609,9606.ENSP00000377958,9606.ENSP00000379350,9606.ENSP00000379616,9606.ENSP00000398610,9606.ENSP00000437125,9606.ENSP00000479606	STOM,PDIA3,LAMP1,CTSB,ANXA2,ANXA6,SND1,HSP90AB1,CCT4,ITGB1,MYH11,ANXA11,HSPA8,CLTC
GO:0098576	Lumenal side of membrane	4	32	12.5	1.07	0.0099	9606.ENSP00000320866,9606.ENSP00000353099,9606.ENSP00000365402,9606.ENSP00000437125	CALR,HLA-DRB1,HLA-C,HSPA8
GO:0005751	Mitochondrial respiratory chain complex IV	3	24	12.5	1.07	0.0419	9606.ENSP00000339720,9606.ENSP00000425759,9606.ENSP00000466818	NDUFA4,COX7C,COX6B1
GO:0032982	Myosin filament	3	24	12.5	1.07	0.0419	9606.ENSP00000216181,9606.ENSP00000379616,9606.ENSP00000384330	MYH9,MYH11,MYH8
GO:0030864	Cortical actin cytoskeleton	9	73	12.3288	1.06	8.41e-06	9606.ENSP00000216181,9606.ENSP00000246069,9606.ENSP00000252699,9606.ENSP00000268182,9606.ENSP00000339063,9606.ENSP00000349259,9606.ENSP00000377941,9606.ENSP00000487444,9606.ENSP00000495214	MYH9,DSTN,ACTN4,IQGAP1,EEF1A1,SPTBN1,ACTN1,SPTAN1,SPTA1
GO:1904813	ficolin-1-rich granule lumen	15	124	12.0968	1.05	1.68e-09	9606.ENSP00000241052,9606.ENSP00000263401,9606.ENSP00000339063,9606.ENSP00000345347,9606.ENSP00000345672,9606.ENSP00000359991,9606.ENSP00000360609,9606.ENSP00000364802,9606.ENSP00000378760,9606.ENSP00000386284,9606.ENSP00000405573,9606.ENSP00000419425,9606.ENSP00000437125,9606.ENSP00000442318,9606.ENSP00000496166	CAT,COMMD9,EEF1A1,HMGB1,CTSB,PGAM1,HSP90AB1,HSPA1A,MVP,ALAD,GPI,PPIA,HSPA8,CAND1,ALDOA
GO:0034774	Secretory granule lumen	38	321	11.838	1.04	1.46e-24	9606.ENSP00000225275,9606.ENSP00000231751,9606.ENSP00000241052,9606.ENSP00000245907,9606.ENSP00000252699,9606.ENSP00000259396,9606.ENSP00000263401,9606.ENSP00000295897,9606.ENSP00000296028,9606.ENSP00000297258,9606.ENSP00000306099,9606.ENSP00000321853,9606.ENSP00000323929,9606.ENSP00000328359,9606.ENSP00000336829,9606.ENSP00000339063,9606.ENSP00000342026,9606.ENSP00000345347,9606.ENSP00000346032,…	MPO,LTF,CAT,C3,ACTN4,ORM1,COMMD9,ALB,PPBP,FABP5,FGB,SERPINF2,A2M,DEFA3,FGG,EEF1A1,PRDX6,HMGB1,ANXA2,HP,PGAM1,HSP90AB1,GDI2,CPPED1,NIT2,ACTN1,MVP,TF,ALAD,GPI,PPIA,HSPA8,CAND1,NPC2,CNN2,SPTAN1,ALDOA,FGA
GO:0071556	Integral component of lumenal side of endoplasmic reticulum membrane	3	26	11.5385	1.03	0.0484	9606.ENSP00000320866,9606.ENSP00000353099,9606.ENSP00000365402	CALR,HLA-DRB1,HLA-C
GO:0030863	Cortical cytoskeleton	11	102	10.7843	1	1.48e-06	9606.ENSP00000216181,9606.ENSP00000246069,9606.ENSP00000252699,9606.ENSP00000262418,9606.ENSP00000268182,9606.ENSP00000339063,9606.ENSP00000349259,9606.ENSP00000358547,9606.ENSP00000377941,9606.ENSP00000487444,9606.ENSP00000495214	MYH9,DSTN,ACTN4,SLC4A1,IQGAP1,EEF1A1,SPTBN1,MPP1,ACTN1,SPTAN1,SPTA1
GO:0042582	Azurophil granule	15	154	9.74026	0.96	2.28e-08	9606.ENSP00000225275,9606.ENSP00000245907,9606.ENSP00000283415,9606.ENSP00000286713,9606.ENSP00000297258,9606.ENSP00000328359,9606.ENSP00000333298,9606.ENSP00000342026,9606.ENSP00000345656,9606.ENSP00000346032,9606.ENSP00000369538,9606.ENSP00000371193,9606.ENSP00000378394,9606.ENSP00000398610,9606.ENSP00000451206	MPO,C3,LPCAT1,STOM,FABP5,DEFA3,LAMP1,PRDX6,VAPA,ANXA2,GDI2,CPPED1,PSAP,ANXA11,NPC2
GO:0035578	Azurophil granule lumen	9	91	9.89011	0.96	3.85e-05	9606.ENSP00000225275,9606.ENSP00000245907,9606.ENSP00000297258,9606.ENSP00000328359,9606.ENSP00000342026,9606.ENSP00000346032,9606.ENSP00000369538,9606.ENSP00000371193,9606.ENSP00000451206	MPO,C3,FABP5,DEFA3,PRDX6,ANXA2,GDI2,CPPED1,NPC2
GO:0035580	Specific granule lumen	6	62	9.67742	0.95	0.0019	9606.ENSP00000231751,9606.ENSP00000259396,9606.ENSP00000348170,9606.ENSP00000377696,9606.ENSP00000456436,9606.ENSP00000487444	LTF,ORM1,HP,NIT2,CNN2,SPTAN1
GO:0101002	ficolin-1-rich granule	17	185	9.18919	0.93	3.66e-09	9606.ENSP00000241052,9606.ENSP00000263401,9606.ENSP00000333298,9606.ENSP00000339063,9606.ENSP00000345347,9606.ENSP00000345672,9606.ENSP00000359991,9606.ENSP00000360609,9606.ENSP00000364802,9606.ENSP00000378760,9606.ENSP00000386284,9606.ENSP00000405573,9606.ENSP00000419425,9606.ENSP00000437125,9606.ENSP00000442318,9606.ENSP00000484343,9606.ENSP00000496166	CAT,COMMD9,LAMP1,EEF1A1,HMGB1,CTSB,PGAM1,HSP90AB1,HSPA1A,MVP,ALAD,GPI,PPIA,HSPA8,CAND1,SERPINB6,ALDOA
GO:0016459	Myosin complex	5	56	8.92857	0.92	0.0087	9606.ENSP00000216181,9606.ENSP00000379616,9606.ENSP00000384330,9606.ENSP00000446955,9606.ENSP00000496954	MYH9,MYH11,MYH8,MYL6,MYO1C
GO:0030660	Golgi-associated vesicle membrane	5	57	8.77193	0.91	0.0093	9606.ENSP00000325002,9606.ENSP00000329419,9606.ENSP00000377148,9606.ENSP00000469035,9606.ENSP00000479606	COPG1,COPB2,AP1G1,COPE,CLTC
GO:0035577	Azurophil granule membrane	5	57	8.77193	0.91	0.0093	9606.ENSP00000283415,9606.ENSP00000286713,9606.ENSP00000333298,9606.ENSP00000345656,9606.ENSP00000378394	LPCAT1,STOM,LAMP1,VAPA,PSAP
GO:0005775	Vacuolar lumen	15	175	8.57143	0.9	8.88e-08	9606.ENSP00000225275,9606.ENSP00000245907,9606.ENSP00000297258,9606.ENSP00000327336,9606.ENSP00000328359,9606.ENSP00000342026,9606.ENSP00000345672,9606.ENSP00000346032,9606.ENSP00000363827,9606.ENSP00000369538,9606.ENSP00000371193,9606.ENSP00000378394,9606.ENSP00000384886,9606.ENSP00000437125,9606.ENSP00000451206	MPO,C3,FABP5,BGN,DEFA3,PRDX6,CTSB,ANXA2,HSPG2,GDI2,CPPED1,PSAP,IFI30,HSPA8,NPC2
GO:0005903	Brush border	9	106	8.49057	0.9	0.00012	9606.ENSP00000216181,9606.ENSP00000323856,9606.ENSP00000360609,9606.ENSP00000364935,9606.ENSP00000377284,9606.ENSP00000377941,9606.ENSP00000446955,9606.ENSP00000449089,9606.ENSP00000496954	MYH9,PLEC,HSP90AB1,CLIC1,FOLR1,ACTN1,MYL6,DNM1L,MYO1C
GO:0012507	ER to Golgi transport vesicle membrane	5	58	8.62069	0.9	0.0099	9606.ENSP00000338844,9606.ENSP00000353099,9606.ENSP00000362807,9606.ENSP00000365402,9606.ENSP00000377284	SEC23B,HLA-DRB1,PEF1,HLA-C,FOLR1
GO:0005782	Peroxisomal matrix	4	52	7.69231	0.85	0.0423	9606.ENSP00000221418,9606.ENSP00000241052,9606.ENSP00000313432,9606.ENSP00000363614	ECH1,CAT,GRHPR,HMGCL
GO:0005925	Focal adhesion	31	416	7.45192	0.84	1.07e-14	9606.ENSP00000216181,9606.ENSP00000226299,9606.ENSP00000241052,9606.ENSP00000252699,9606.ENSP00000261263,9606.ENSP00000267257,9606.ENSP00000268182,9606.ENSP00000278572,9606.ENSP00000300289,9606.ENSP00000306330,9606.ENSP00000311430,9606.ENSP00000316029,9606.ENSP00000320866,9606.ENSP00000323856,9606.ENSP00000324422,9606.ENSP00000346550,9606.ENSP00000354251,9606.ENSP00000360305,9606.ENSP00000363827,…	MYH9,LAP3,CAT,ACTN4,RAB21,PXN,IQGAP1,RPS3,PDIA3,YWHAG,RPL4,TLN1,CALR,PLEC,ZYX,ANXA6,NCKAP1,PDLIM1,HSPG2,HSPA1A,GDI2,YWHAQ,ACTN1,ITGB1,LCP1,ARPC1B,CD44,PPIA,HSPA8,CNN2,CLTC
GO:0070820	Tertiary granule	12	164	7.31707	0.83	1.44e-05	9606.ENSP00000231751,9606.ENSP00000259396,9606.ENSP00000286713,9606.ENSP00000296028,9606.ENSP00000319096,9606.ENSP00000333298,9606.ENSP00000348170,9606.ENSP00000377696,9606.ENSP00000456436,9606.ENSP00000484343,9606.ENSP00000487444,9606.ENSP00000496166	LTF,ORM1,STOM,PPBP,RAP2B,LAMP1,HP,NIT2,CNN2,SERPINB6,SPTAN1,ALDOA
GO:0043202	Lysosomal lumen	7	97	7.21649	0.83	0.0027	9606.ENSP00000327336,9606.ENSP00000345672,9606.ENSP00000363827,9606.ENSP00000378394,9606.ENSP00000384886,9606.ENSP00000437125,9606.ENSP00000451206	BGN,CTSB,HSPG2,PSAP,IFI30,HSPA8,NPC2
GO:0005884	Actin filament	7	99	7.07071	0.82	0.003	9606.ENSP00000268182,9606.ENSP00000348163,9606.ENSP00000354251,9606.ENSP00000360305,9606.ENSP00000381581,9606.ENSP00000496494,9606.ENSP00000496954	IQGAP1,PLS3,NCKAP1,PDLIM1,LCP1,TPM2,MYO1C
GO:0005905	Clathrin-coated pit	5	71	7.04225	0.82	0.0203	9606.ENSP00000340019,9606.ENSP00000385834,9606.ENSP00000449089,9606.ENSP00000479606,9606.ENSP00000483185	HSPD1,TF,DNM1L,CLTC,AP2B1
GO:0030662	Coated vesicle membrane	13	193	6.73575	0.8	1.24e-05	9606.ENSP00000325002,9606.ENSP00000329419,9606.ENSP00000338844,9606.ENSP00000353099,9606.ENSP00000362807,9606.ENSP00000365402,9606.ENSP00000377148,9606.ENSP00000377284,9606.ENSP00000385834,9606.ENSP00000437125,9606.ENSP00000469035,9606.ENSP00000479606,9606.ENSP00000483185	COPG1,COPB2,SEC23B,HLA-DRB1,PEF1,HLA-C,AP1G1,FOLR1,TF,HSPA8,COPE,CLTC,AP2B1
GO:0030134	COPII-coated ER to Golgi transport vesicle	6	90	6.66667	0.79	0.0099	9606.ENSP00000330945,9606.ENSP00000338844,9606.ENSP00000353099,9606.ENSP00000362807,9606.ENSP00000365402,9606.ENSP00000377284	TMED9,SEC23B,HLA-DRB1,PEF1,HLA-C,FOLR1
GO:0070062	Extracellular exosome	135	2096	6.44084	0.78	5.51e-72	9606.ENSP00000044462,9606.ENSP00000216181,9606.ENSP00000221418,9606.ENSP00000222219,9606.ENSP00000225275,9606.ENSP00000226299,9606.ENSP00000231751,9606.ENSP00000241052,9606.ENSP00000245907,9606.ENSP00000246069,9606.ENSP00000252603,9606.ENSP00000252699,9606.ENSP00000252999,9606.ENSP00000253039,9606.ENSP00000254810,9606.ENSP00000259396,9606.ENSP00000261263,9606.ENSP00000261313,9606.ENSP00000261772,…	PSMA4,MYH9,ECH1,DNASE2,MPO,LAP3,LTF,CAT,C3,DSTN,PGLS,ACTN4,LAMA5,EIF2S3,H3-3B,ORM1,RAB21,PEBP1,AARS1,SLC4A1,BLVRB,C9,CP,KLKB1,AMBP,HPX,IQGAP1,SOD1,BCAM,RPS3,CCT5,GPD1L,STOM,COL6A3,ALB,FABP5,HPRT1,CKB,PDIA3,GLOD4,HINT1,FGB,YWHAG,F2,RPL4,GRHPR,PFAS,TLN1,RAP2B,CALR,TALDO1,SERPINF2,PLEC,A2M,MDH2,BGN,DEFA3,TMED9,EEF1G,LAMP1,FGG,EEF1A1,HSPD1,PARK7,PPL,SFN,PRDX6,SNRPD2,CTSB,ANXA2,ANXA6,SND1,ALDH9A1,WARS…
GO:0030141	Secretory granule	56	873	6.41466	0.78	1.31e-24	9606.ENSP00000216181,9606.ENSP00000225275,9606.ENSP00000231751,9606.ENSP00000241052,9606.ENSP00000245907,9606.ENSP00000252699,9606.ENSP00000259396,9606.ENSP00000263401,9606.ENSP00000268182,9606.ENSP00000270142,9606.ENSP00000283415,9606.ENSP00000286713,9606.ENSP00000295897,9606.ENSP00000296028,9606.ENSP00000297258,9606.ENSP00000306099,9606.ENSP00000319096,9606.ENSP00000320866,9606.ENSP00000321853,…	MYH9,MPO,LTF,CAT,C3,ACTN4,ORM1,COMMD9,IQGAP1,SOD1,LPCAT1,STOM,ALB,PPBP,FABP5,FGB,RAP2B,CALR,SERPINF2,A2M,DEFA3,LAMP1,FGG,EEF1A1,HSPD1,PRDX6,HMGB1,VAPA,CTSB,ANXA2,HP,PGAM1,HSP90AB1,HSPA1A,HLA-C,GDI2,CPPED1,NIT2,ACTN1,PSAP,MVP,CD14,TF,ALAD,ANXA11,CD44,GPI,PPIA,HSPA8,CAND1,NPC2,CNN2,SERPINB6,SPTAN1,ALDOA,FGA
GO:0045335	Phagocytic vesicle	9	139	6.47482	0.78	0.00073	9606.ENSP00000225275,9606.ENSP00000231751,9606.ENSP00000300289,9606.ENSP00000320866,9606.ENSP00000324422,9606.ENSP00000333298,9606.ENSP00000365402,9606.ENSP00000398610,9606.ENSP00000496954	MPO,LTF,PDIA3,CALR,ZYX,LAMP1,HLA-C,ANXA11,MYO1C
GO:0005798	Golgi-associated vesicle	6	92	6.52174	0.78	0.0108	9606.ENSP00000325002,9606.ENSP00000329419,9606.ENSP00000330945,9606.ENSP00000377148,9606.ENSP00000469035,9606.ENSP00000479606	COPG1,COPB2,TMED9,AP1G1,COPE,CLTC
GO:0062023	Collagen-containing extracellular matrix	25	407	6.14251	0.76	4.83e-10	9606.ENSP00000252999,9606.ENSP00000259396,9606.ENSP00000265132,9606.ENSP00000265983,9606.ENSP00000270233,9606.ENSP00000295550,9606.ENSP00000306099,9606.ENSP00000308541,9606.ENSP00000320866,9606.ENSP00000321853,9606.ENSP00000323929,9606.ENSP00000325527,9606.ENSP00000327336,9606.ENSP00000336829,9606.ENSP00000345672,9606.ENSP00000346032,9606.ENSP00000346550,9606.ENSP00000353654,9606.ENSP00000355180,…	LAMA5,ORM1,AMBP,HPX,BCAM,COL6A3,FGB,F2,CALR,SERPINF2,A2M,FBN1,BGN,FGG,CTSB,ANXA2,ANXA6,COL4A2,COL6A1,HSPG2,EMILIN1,PSAP,ANXA11,SERPINB6,FGA
GO:0098862	Cluster of actin-based cell projections	10	163	6.13497	0.76	0.00042	9606.ENSP00000216181,9606.ENSP00000323856,9606.ENSP00000358547,9606.ENSP00000360609,9606.ENSP00000364935,9606.ENSP00000377284,9606.ENSP00000377941,9606.ENSP00000446955,9606.ENSP00000449089,9606.ENSP00000496954	MYH9,PLEC,MPP1,HSP90AB1,CLIC1,FOLR1,ACTN1,MYL6,DNM1L,MYO1C
GO:1905369	Endopeptidase complex	6	104	5.76923	0.73	0.0183	9606.ENSP00000044462,9606.ENSP00000210313,9606.ENSP00000245907,9606.ENSP00000264690,9606.ENSP00000308541,9606.ENSP00000356399	PSMA4,PSMD5,C3,KLKB1,F2,CFH
GO:0001726	Ruffle	10	179	5.58659	0.72	0.00087	9606.ENSP00000216181,9606.ENSP00000268182,9606.ENSP00000278572,9606.ENSP00000316029,9606.ENSP00000339063,9606.ENSP00000354251,9606.ENSP00000377941,9606.ENSP00000379350,9606.ENSP00000381581,9606.ENSP00000496954	MYH9,IQGAP1,RPS3,TLN1,EEF1A1,NCKAP1,ACTN1,ITGB1,LCP1,MYO1C
GO:0042581	Specific granule	9	159	5.66038	0.72	0.0018	9606.ENSP00000231751,9606.ENSP00000259396,9606.ENSP00000286713,9606.ENSP00000319096,9606.ENSP00000348170,9606.ENSP00000377696,9606.ENSP00000398610,9606.ENSP00000456436,9606.ENSP00000487444	LTF,ORM1,STOM,RAP2B,HP,NIT2,ANXA11,CNN2,SPTAN1
GO:0099503	Secretory vesicle	58	1047	5.53964	0.71	9.64e-23	9606.ENSP00000216181,9606.ENSP00000225275,9606.ENSP00000231751,9606.ENSP00000241052,9606.ENSP00000245907,9606.ENSP00000252699,9606.ENSP00000259396,9606.ENSP00000263401,9606.ENSP00000268182,9606.ENSP00000270142,9606.ENSP00000283415,9606.ENSP00000286713,9606.ENSP00000295897,9606.ENSP00000296028,9606.ENSP00000297258,9606.ENSP00000306099,9606.ENSP00000319096,9606.ENSP00000320866,9606.ENSP00000321853,…	MYH9,MPO,LTF,CAT,C3,ACTN4,ORM1,COMMD9,IQGAP1,SOD1,LPCAT1,STOM,ALB,PPBP,FABP5,FGB,RAP2B,CALR,SERPINF2,A2M,DEFA3,TMED9,LAMP1,FGG,EEF1A1,HSPD1,PRDX6,HMGB1,VAPA,CTSB,ANXA2,HP,PGAM1,HSP90AB1,HSPA1A,HLA-C,GDI2,CPPED1,NIT2,ACTN1,PSAP,MVP,CD14,TF,ALAD,ANXA11,CD44,GPI,PPIA,HSPA8,CAND1,DNM1L,NPC2,CNN2,SERPINB6,SPTAN1,ALDOA,FGA
GO:0015629	Actin cytoskeleton	26	482	5.39419	0.7	2.57e-09	9606.ENSP00000216181,9606.ENSP00000246069,9606.ENSP00000252699,9606.ENSP00000267257,9606.ENSP00000268182,9606.ENSP00000324422,9606.ENSP00000339063,9606.ENSP00000348163,9606.ENSP00000349259,9606.ENSP00000354251,9606.ENSP00000358081,9606.ENSP00000360305,9606.ENSP00000376800,9606.ENSP00000377941,9606.ENSP00000379616,9606.ENSP00000381581,9606.ENSP00000384330,9606.ENSP00000389631,9606.ENSP00000422896,…	MYH9,DSTN,ACTN4,PXN,IQGAP1,ZYX,EEF1A1,PLS3,SPTBN1,NCKAP1,BAG3,PDLIM1,MTPN,ACTN1,MYH11,LCP1,MYH8,ARPC1B,SEPTIN11,MYL6,CNN2,SPTAN1,SPTA1,ALDOA,TPM2,MYO1C
GO:0005788	Endoplasmic reticulum lumen	17	312	5.44872	0.7	3.79e-06	9606.ENSP00000245907,9606.ENSP00000264613,9606.ENSP00000295550,9606.ENSP00000295897,9606.ENSP00000300289,9606.ENSP00000303920,9606.ENSP00000308541,9606.ENSP00000320866,9606.ENSP00000325527,9606.ENSP00000336829,9606.ENSP00000353654,9606.ENSP00000355180,9606.ENSP00000356969,9606.ENSP00000361926,9606.ENSP00000385834,9606.ENSP00000460236,9606.ENSP00000498441	C3,CP,COL6A3,ALB,PDIA3,MZB1,F2,CALR,FBN1,FGG,COL4A2,COL6A1,APOA2,CNPY3,TF,SPON1,FGA
GO:0042383	Sarcolemma	7	132	5.30303	0.69	0.0122	9606.ENSP00000295550,9606.ENSP00000323856,9606.ENSP00000327336,9606.ENSP00000333298,9606.ENSP00000346032,9606.ENSP00000355180,9606.ENSP00000379350	COL6A3,PLEC,BGN,LAMP1,ANXA2,COL6A1,ITGB1
GO:0031256	Leading edge membrane	9	173	5.20231	0.68	0.0031	9606.ENSP00000278572,9606.ENSP00000316029,9606.ENSP00000339063,9606.ENSP00000349259,9606.ENSP00000354251,9606.ENSP00000379350,9606.ENSP00000381581,9606.ENSP00000398632,9606.ENSP00000496954	RPS3,TLN1,EEF1A1,SPTBN1,NCKAP1,ITGB1,LCP1,CD44,MYO1C
GO:0005764	Lysosome	37	746	4.95979	0.66	1.67e-12	9606.ENSP00000222219,9606.ENSP00000225275,9606.ENSP00000229268,9606.ENSP00000241052,9606.ENSP00000245907,9606.ENSP00000258198,9606.ENSP00000264613,9606.ENSP00000270142,9606.ENSP00000283415,9606.ENSP00000286713,9606.ENSP00000297258,9606.ENSP00000320866,9606.ENSP00000327336,9606.ENSP00000328359,9606.ENSP00000333298,9606.ENSP00000339063,9606.ENSP00000342026,9606.ENSP00000345656,9606.ENSP00000345672,…	DNASE2,MPO,USP5,CAT,C3,DYNC1LI2,CP,SOD1,LPCAT1,STOM,FABP5,CALR,BGN,DEFA3,LAMP1,EEF1A1,PRDX6,VAPA,CTSB,ANXA2,ANXA6,HLA-DRB1,COL6A1,HSP90AB1,ATP6V1G1,HSPG2,GDI2,CPPED1,AP1G1,PSAP,IFI30,PCYOX1,ANXA11,HSPA8,NPC2,CLTC,AP2B1
GO:0030135	Coated vesicle	15	307	4.88599	0.66	6.15e-05	9606.ENSP00000325002,9606.ENSP00000329419,9606.ENSP00000330945,9606.ENSP00000338844,9606.ENSP00000340019,9606.ENSP00000353099,9606.ENSP00000362807,9606.ENSP00000365402,9606.ENSP00000377148,9606.ENSP00000377284,9606.ENSP00000385834,9606.ENSP00000437125,9606.ENSP00000469035,9606.ENSP00000479606,9606.ENSP00000483185	COPG1,COPB2,TMED9,SEC23B,HSPD1,HLA-DRB1,PEF1,HLA-C,AP1G1,FOLR1,TF,HSPA8,COPE,CLTC,AP2B1
GO:0005777	Peroxisome	7	143	4.8951	0.66	0.0183	9606.ENSP00000221418,9606.ENSP00000223136,9606.ENSP00000241052,9606.ENSP00000270142,9606.ENSP00000313432,9606.ENSP00000363614,9606.ENSP00000449089	ECH1,FIS1,CAT,SOD1,GRHPR,HMGCL,DNM1L
GO:0031674	I band	7	146	4.79452	0.65	0.0201	9606.ENSP00000252699,9606.ENSP00000262418,9606.ENSP00000323856,9606.ENSP00000358081,9606.ENSP00000360305,9606.ENSP00000377941,9606.ENSP00000496166	ACTN4,SLC4A1,PLEC,BAG3,PDLIM1,ACTN1,ALDOA
GO:0031012	Extracellular matrix	26	552	4.71014	0.64	3.22e-08	9606.ENSP00000252999,9606.ENSP00000259396,9606.ENSP00000265132,9606.ENSP00000265983,9606.ENSP00000270233,9606.ENSP00000295550,9606.ENSP00000306099,9606.ENSP00000308541,9606.ENSP00000320866,9606.ENSP00000321853,9606.ENSP00000323929,9606.ENSP00000325527,9606.ENSP00000327336,9606.ENSP00000336829,9606.ENSP00000345672,9606.ENSP00000346032,9606.ENSP00000346550,9606.ENSP00000353654,9606.ENSP00000355180,…	LAMA5,ORM1,AMBP,HPX,BCAM,COL6A3,FGB,F2,CALR,SERPINF2,A2M,FBN1,BGN,FGG,CTSB,ANXA2,ANXA6,COL4A2,COL6A1,HSPG2,EMILIN1,PSAP,ANXA11,SPON1,SERPINB6,FGA
GO:0005938	Cell cortex	14	304	4.60526	0.63	0.00023	9606.ENSP00000216181,9606.ENSP00000246069,9606.ENSP00000252699,9606.ENSP00000262418,9606.ENSP00000267257,9606.ENSP00000268182,9606.ENSP00000306099,9606.ENSP00000339063,9606.ENSP00000349259,9606.ENSP00000358547,9606.ENSP00000377941,9606.ENSP00000422896,9606.ENSP00000487444,9606.ENSP00000495214	MYH9,DSTN,ACTN4,SLC4A1,PXN,IQGAP1,FGB,EEF1A1,SPTBN1,MPP1,ACTN1,SEPTIN11,SPTAN1,SPTA1
GO:0030017	Sarcomere	10	217	4.60829	0.63	0.0035	9606.ENSP00000252699,9606.ENSP00000262418,9606.ENSP00000323856,9606.ENSP00000349259,9606.ENSP00000358081,9606.ENSP00000360305,9606.ENSP00000377941,9606.ENSP00000384330,9606.ENSP00000496166,9606.ENSP00000496494	ACTN4,SLC4A1,PLEC,SPTBN1,BAG3,PDLIM1,ACTN1,MYH8,ALDOA,TPM2
GO:0030665	Clathrin-coated vesicle membrane	6	130	4.61538	0.63	0.0469	9606.ENSP00000353099,9606.ENSP00000377148,9606.ENSP00000385834,9606.ENSP00000437125,9606.ENSP00000479606,9606.ENSP00000483185	HLA-DRB1,AP1G1,TF,HSPA8,CLTC,AP2B1
GO:0030018	Z disc	6	131	4.58015	0.63	0.0483	9606.ENSP00000252699,9606.ENSP00000262418,9606.ENSP00000323856,9606.ENSP00000358081,9606.ENSP00000360305,9606.ENSP00000377941	ACTN4,SLC4A1,PLEC,BAG3,PDLIM1,ACTN1
GO:0030139	Endocytic vesicle	15	338	4.43787	0.62	0.00017	9606.ENSP00000225275,9606.ENSP00000231751,9606.ENSP00000265983,9606.ENSP00000300289,9606.ENSP00000320866,9606.ENSP00000324422,9606.ENSP00000333298,9606.ENSP00000348170,9606.ENSP00000353099,9606.ENSP00000365402,9606.ENSP00000385834,9606.ENSP00000398610,9606.ENSP00000479606,9606.ENSP00000483185,9606.ENSP00000496954	MPO,LTF,HPX,PDIA3,CALR,ZYX,LAMP1,HP,HLA-DRB1,HLA-C,TF,ANXA11,CLTC,AP2B1,MYO1C
GO:0043292	Contractile fiber	11	246	4.47154	0.62	0.0022	9606.ENSP00000252699,9606.ENSP00000262418,9606.ENSP00000323856,9606.ENSP00000349259,9606.ENSP00000358081,9606.ENSP00000360305,9606.ENSP00000377941,9606.ENSP00000379616,9606.ENSP00000384330,9606.ENSP00000496166,9606.ENSP00000496494	ACTN4,SLC4A1,PLEC,SPTBN1,BAG3,PDLIM1,ACTN1,MYH11,MYH8,ALDOA,TPM2
GO:0005615	Extracellular space	140	3247	4.31167	0.6	9.25e-55	9606.ENSP00000044462,9606.ENSP00000216181,9606.ENSP00000221418,9606.ENSP00000222219,9606.ENSP00000225275,9606.ENSP00000226299,9606.ENSP00000231751,9606.ENSP00000241052,9606.ENSP00000245907,9606.ENSP00000246069,9606.ENSP00000252603,9606.ENSP00000252699,9606.ENSP00000252999,9606.ENSP00000253039,9606.ENSP00000254810,9606.ENSP00000259396,9606.ENSP00000261263,9606.ENSP00000261313,9606.ENSP00000261772,…	PSMA4,MYH9,ECH1,DNASE2,MPO,LAP3,LTF,CAT,C3,DSTN,PGLS,ACTN4,LAMA5,EIF2S3,H3-3B,ORM1,RAB21,PEBP1,AARS1,SLC4A1,BLVRB,C9,CP,KLKB1,AMBP,HPX,IQGAP1,SOD1,BCAM,RPS3,CCT5,GPD1L,STOM,COL6A3,ALB,PPBP,FABP5,HPRT1,CKB,PDIA3,GLOD4,HINT1,FGB,YWHAG,F2,RPL4,GRHPR,PFAS,TLN1,RAP2B,CALR,TALDO1,SERPINF2,PLEC,A2M,FBN1,MDH2,BGN,DEFA3,TMED9,EEF1G,LAMP1,FGG,EEF1A1,HSPD1,PARK7,PPL,SFN,PRDX6,SNRPD2,HMGB1,CTSB,ANXA2,ANXA6,S…
GO:0005765	Lysosomal membrane	17	417	4.07674	0.58	0.00013	9606.ENSP00000264613,9606.ENSP00000283415,9606.ENSP00000286713,9606.ENSP00000333298,9606.ENSP00000339063,9606.ENSP00000345656,9606.ENSP00000346032,9606.ENSP00000346550,9606.ENSP00000353099,9606.ENSP00000355180,9606.ENSP00000360609,9606.ENSP00000363162,9606.ENSP00000377148,9606.ENSP00000378394,9606.ENSP00000437125,9606.ENSP00000479606,9606.ENSP00000483185	CP,LPCAT1,STOM,LAMP1,EEF1A1,VAPA,ANXA2,ANXA6,HLA-DRB1,COL6A1,HSP90AB1,ATP6V1G1,AP1G1,PSAP,HSPA8,CLTC,AP2B1
GO:0031982	Vesicle	154	3957	3.89184	0.56	2.07e-57	9606.ENSP00000044462,9606.ENSP00000216181,9606.ENSP00000221418,9606.ENSP00000222219,9606.ENSP00000225275,9606.ENSP00000226299,9606.ENSP00000231751,9606.ENSP00000241052,9606.ENSP00000245907,9606.ENSP00000246069,9606.ENSP00000252603,9606.ENSP00000252699,9606.ENSP00000252999,9606.ENSP00000253039,9606.ENSP00000254810,9606.ENSP00000258198,9606.ENSP00000259396,9606.ENSP00000261263,9606.ENSP00000261313,…	PSMA4,MYH9,ECH1,DNASE2,MPO,LAP3,LTF,CAT,C3,DSTN,PGLS,ACTN4,LAMA5,EIF2S3,H3-3B,DYNC1LI2,ORM1,RAB21,PEBP1,AARS1,SLC4A1,BLVRB,COMMD9,C9,CP,KLKB1,AMBP,HPX,PML,IQGAP1,SOD1,BCAM,RPS3,CCT5,GPD1L,LPCAT1,STOM,COL6A3,ALB,PPBP,FABP5,HPRT1,CKB,PDIA3,GLOD4,HINT1,FGB,YWHAG,F2,RPL4,GRHPR,PFAS,TLN1,RAP2B,CALR,TALDO1,SERPINF2,PLEC,A2M,ZYX,COPG1,MDH2,BGN,DEFA3,COPB2,TMED9,EEF1G,LAMP1,FGG,SEC23B,EEF1A1,HSPD1,PARK7,…
GO:0030667	Secretory granule membrane	12	308	3.8961	0.56	0.0035	9606.ENSP00000268182,9606.ENSP00000283415,9606.ENSP00000286713,9606.ENSP00000297258,9606.ENSP00000319096,9606.ENSP00000333298,9606.ENSP00000345656,9606.ENSP00000365402,9606.ENSP00000378394,9606.ENSP00000385519,9606.ENSP00000398632,9606.ENSP00000484343	IQGAP1,LPCAT1,STOM,FABP5,RAP2B,LAMP1,VAPA,HLA-C,PSAP,CD14,CD44,SERPINB6
GO:0030136	Clathrin-coated vesicle	8	211	3.79147	0.55	0.036	9606.ENSP00000330945,9606.ENSP00000353099,9606.ENSP00000377148,9606.ENSP00000377284,9606.ENSP00000385834,9606.ENSP00000437125,9606.ENSP00000479606,9606.ENSP00000483185	TMED9,HLA-DRB1,AP1G1,FOLR1,TF,HSPA8,CLTC,AP2B1
GO:0098552	Side of membrane	22	611	3.60065	0.52	3.83e-05	9606.ENSP00000216181,9606.ENSP00000261263,9606.ENSP00000262418,9606.ENSP00000268182,9606.ENSP00000270233,9606.ENSP00000298223,9606.ENSP00000306099,9606.ENSP00000320866,9606.ENSP00000333298,9606.ENSP00000336829,9606.ENSP00000339063,9606.ENSP00000345672,9606.ENSP00000353099,9606.ENSP00000365402,9606.ENSP00000377284,9606.ENSP00000379350,9606.ENSP00000385519,9606.ENSP00000385834,9606.ENSP00000437125,…	MYH9,RAB21,SLC4A1,IQGAP1,BCAM,FOLR2,FGB,CALR,LAMP1,FGG,EEF1A1,CTSB,HLA-DRB1,HLA-C,FOLR1,ITGB1,CD14,TF,HSPA8,AP2B1,SPTA1,FGA
GO:0030658	Transport vesicle membrane	8	222	3.6036	0.52	0.0462	9606.ENSP00000338844,9606.ENSP00000353099,9606.ENSP00000362807,9606.ENSP00000365402,9606.ENSP00000377148,9606.ENSP00000377284,9606.ENSP00000449089,9606.ENSP00000479606	SEC23B,HLA-DRB1,PEF1,HLA-C,AP1G1,FOLR1,DNM1L,CLTC
GO:0005576	Extracellular region	146	4175	3.49701	0.51	7.25e-47	9606.ENSP00000044462,9606.ENSP00000216181,9606.ENSP00000221418,9606.ENSP00000222219,9606.ENSP00000225275,9606.ENSP00000226299,9606.ENSP00000231751,9606.ENSP00000241052,9606.ENSP00000245907,9606.ENSP00000246069,9606.ENSP00000252603,9606.ENSP00000252699,9606.ENSP00000252999,9606.ENSP00000253039,9606.ENSP00000254810,9606.ENSP00000259396,9606.ENSP00000261263,9606.ENSP00000261313,9606.ENSP00000261772,…	PSMA4,MYH9,ECH1,DNASE2,MPO,LAP3,LTF,CAT,C3,DSTN,PGLS,ACTN4,LAMA5,EIF2S3,H3-3B,ORM1,RAB21,PEBP1,AARS1,SLC4A1,BLVRB,COMMD9,C9,CP,KLKB1,AMBP,HPX,IQGAP1,SOD1,BCAM,RPS3,CCT5,GPD1L,STOM,COL6A3,ALB,PPBP,FABP5,FOLR2,HPRT1,CKB,PDIA3,GLOD4,MZB1,HINT1,FGB,YWHAG,F2,RPL4,GRHPR,PFAS,TLN1,RAP2B,CALR,TALDO1,SERPINF2,PLEC,A2M,FBN1,MDH2,BGN,DEFA3,TMED9,EEF1G,LAMP1,FGG,EEF1A1,HSPD1,PARK7,PPL,SFN,PRDX6,SNRPD2,HMGB1,…
GO:0031253	Cell projection membrane	12	342	3.50877	0.51	0.008	9606.ENSP00000278572,9606.ENSP00000316029,9606.ENSP00000339063,9606.ENSP00000349259,9606.ENSP00000354251,9606.ENSP00000360609,9606.ENSP00000377284,9606.ENSP00000379350,9606.ENSP00000381581,9606.ENSP00000398632,9606.ENSP00000405573,9606.ENSP00000496954	RPS3,TLN1,EEF1A1,SPTBN1,NCKAP1,HSP90AB1,FOLR1,ITGB1,LCP1,CD44,GPI,MYO1C
GO:0031410	Cytoplasmic vesicle	84	2482	3.38437	0.5	1.13e-20	9606.ENSP00000216181,9606.ENSP00000225275,9606.ENSP00000231751,9606.ENSP00000241052,9606.ENSP00000245907,9606.ENSP00000252699,9606.ENSP00000258198,9606.ENSP00000259396,9606.ENSP00000261263,9606.ENSP00000263401,9606.ENSP00000265983,9606.ENSP00000268058,9606.ENSP00000268182,9606.ENSP00000270142,9606.ENSP00000283415,9606.ENSP00000286713,9606.ENSP00000295897,9606.ENSP00000296028,9606.ENSP00000297258,…	MYH9,MPO,LTF,CAT,C3,ACTN4,DYNC1LI2,ORM1,RAB21,COMMD9,HPX,PML,IQGAP1,SOD1,LPCAT1,STOM,ALB,PPBP,FABP5,PDIA3,FGB,RAP2B,CALR,SERPINF2,A2M,ZYX,COPG1,BGN,DEFA3,COPB2,TMED9,LAMP1,FGG,SEC23B,EEF1A1,HSPD1,PRDX6,HMGB1,VAPA,CTSB,ANXA2,ANXA6,SND1,HP,HLA-DRB1,APOA2,PGAM1,HSP90AB1,PEF1,HSPA1A,HLA-C,GDI2,CPPED1,AP1G1,FOLR1,NIT2,ACTN1,CCT4,PSAP,MVP,ITGB1,MYH11,CD14,TF,ALAD,ANXA11,CD44,GPI,PPIA,HSPA8,CAND1,DNM1L,…
GO:0048471	Perinuclear region of cytoplasm	25	727	3.43879	0.5	1.58e-05	9606.ENSP00000216714,9606.ENSP00000252699,9606.ENSP00000268717,9606.ENSP00000273986,9606.ENSP00000286713,9606.ENSP00000320866,9606.ENSP00000323856,9606.ENSP00000333298,9606.ENSP00000338844,9606.ENSP00000340278,9606.ENSP00000342026,9606.ENSP00000345672,9606.ENSP00000346550,9606.ENSP00000357283,9606.ENSP00000360609,9606.ENSP00000364802,9606.ENSP00000364935,9606.ENSP00000376800,9606.ENSP00000377148,…	APEX1,ACTN4,COPS3,CISD2,STOM,CALR,PLEC,LAMP1,SEC23B,PARK7,PRDX6,CTSB,ANXA6,LMNA,HSP90AB1,HSPA1A,CLIC1,MTPN,AP1G1,MVP,ITGB1,LCP1,TF,HSPA8,DNM1L
GO:0009897	External side of plasma membrane	13	388	3.35052	0.49	0.0072	9606.ENSP00000270233,9606.ENSP00000298223,9606.ENSP00000306099,9606.ENSP00000320866,9606.ENSP00000333298,9606.ENSP00000336829,9606.ENSP00000345672,9606.ENSP00000353099,9606.ENSP00000377284,9606.ENSP00000379350,9606.ENSP00000385519,9606.ENSP00000385834,9606.ENSP00000498441	BCAM,FOLR2,FGB,CALR,LAMP1,FGG,CTSB,HLA-DRB1,FOLR1,ITGB1,CD14,TF,FGA
GO:0030133	Transport vesicle	14	427	3.27869	0.48	0.0054	9606.ENSP00000325002,9606.ENSP00000327336,9606.ENSP00000329419,9606.ENSP00000330945,9606.ENSP00000333298,9606.ENSP00000338844,9606.ENSP00000353099,9606.ENSP00000362807,9606.ENSP00000365402,9606.ENSP00000377148,9606.ENSP00000377284,9606.ENSP00000449089,9606.ENSP00000469035,9606.ENSP00000479606	COPG1,BGN,COPB2,TMED9,LAMP1,SEC23B,HLA-DRB1,PEF1,HLA-C,AP1G1,FOLR1,DNM1L,COPE,CLTC
GO:0070161	Anchoring junction	42	1325	3.16981	0.47	2.27e-08	9606.ENSP00000216181,9606.ENSP00000226299,9606.ENSP00000241052,9606.ENSP00000252699,9606.ENSP00000261263,9606.ENSP00000267257,9606.ENSP00000268182,9606.ENSP00000278572,9606.ENSP00000297258,9606.ENSP00000297991,9606.ENSP00000300289,9606.ENSP00000306330,9606.ENSP00000311430,9606.ENSP00000316029,9606.ENSP00000319096,9606.ENSP00000320866,9606.ENSP00000323856,9606.ENSP00000324422,9606.ENSP00000340278,…	MYH9,LAP3,CAT,ACTN4,RAB21,PXN,IQGAP1,RPS3,FABP5,AQP3,PDIA3,YWHAG,RPL4,TLN1,RAP2B,CALR,PLEC,ZYX,PARK7,PPL,VAPA,ANXA2,ANXA6,NCKAP1,MPP1,PDLIM1,HSPG2,HSPA1A,GDI2,YWHAQ,ACTN1,ITGB1,LCP1,ARPC1B,CD44,MPST,PPIA,SEPTIN11,HSPA8,DNM1L,CNN2,CLTC
GO:0005911	Cell-cell junction	16	499	3.20641	0.47	0.0029	9606.ENSP00000216181,9606.ENSP00000267257,9606.ENSP00000268182,9606.ENSP00000297991,9606.ENSP00000316029,9606.ENSP00000319096,9606.ENSP00000324422,9606.ENSP00000340278,9606.ENSP00000340510,9606.ENSP00000345656,9606.ENSP00000346032,9606.ENSP00000358547,9606.ENSP00000360305,9606.ENSP00000377941,9606.ENSP00000379350,9606.ENSP00000456436	MYH9,PXN,IQGAP1,AQP3,TLN1,RAP2B,ZYX,PARK7,PPL,VAPA,ANXA2,MPP1,PDLIM1,ACTN1,ITGB1,CNN2
GO:0031252	Cell leading edge	13	422	3.08057	0.46	0.0136	9606.ENSP00000216181,9606.ENSP00000267257,9606.ENSP00000268182,9606.ENSP00000278572,9606.ENSP00000316029,9606.ENSP00000339063,9606.ENSP00000349259,9606.ENSP00000354251,9606.ENSP00000377941,9606.ENSP00000379350,9606.ENSP00000381581,9606.ENSP00000398632,9606.ENSP00000496954	MYH9,PXN,IQGAP1,RPS3,TLN1,EEF1A1,SPTBN1,NCKAP1,ACTN1,ITGB1,LCP1,CD44,MYO1C
GO:0099081	Supramolecular polymer	29	1009	2.87413	0.43	6.04e-05	9606.ENSP00000216181,9606.ENSP00000252699,9606.ENSP00000258198,9606.ENSP00000262418,9606.ENSP00000268182,9606.ENSP00000280326,9606.ENSP00000295550,9606.ENSP00000323856,9606.ENSP00000325527,9606.ENSP00000348163,9606.ENSP00000349259,9606.ENSP00000353099,9606.ENSP00000353375,9606.ENSP00000353654,9606.ENSP00000354251,9606.ENSP00000355180,9606.ENSP00000357283,9606.ENSP00000358081,9606.ENSP00000360305,…	MYH9,ACTN4,DYNC1LI2,SLC4A1,IQGAP1,CCT5,COL6A3,PLEC,FBN1,PLS3,SPTBN1,HLA-DRB1,MAP4,COL4A2,NCKAP1,COL6A1,LMNA,BAG3,PDLIM1,ACTN1,CCT4,MYH11,LCP1,MYH8,DNM1L,CLTC,ALDOA,TPM2,MYO1C
GO:0009986	Cell surface	26	894	2.90828	0.43	0.00016	9606.ENSP00000231751,9606.ENSP00000245907,9606.ENSP00000265132,9606.ENSP00000270233,9606.ENSP00000298223,9606.ENSP00000300289,9606.ENSP00000306099,9606.ENSP00000316029,9606.ENSP00000320866,9606.ENSP00000321853,9606.ENSP00000327336,9606.ENSP00000333298,9606.ENSP00000336829,9606.ENSP00000340019,9606.ENSP00000345347,9606.ENSP00000345672,9606.ENSP00000346032,9606.ENSP00000353099,9606.ENSP00000360609,…	LTF,C3,AMBP,BCAM,FOLR2,PDIA3,FGB,TLN1,CALR,SERPINF2,BGN,LAMP1,FGG,HSPD1,HMGB1,CTSB,ANXA2,HLA-DRB1,HSP90AB1,HLA-C,FOLR1,ITGB1,CD14,TF,CD44,FGA
GO:0005635	Nuclear envelope	14	487	2.87474	0.43	0.0162	9606.ENSP00000261574,9606.ENSP00000265132,9606.ENSP00000266732,9606.ENSP00000268058,9606.ENSP00000320866,9606.ENSP00000345656,9606.ENSP00000356864,9606.ENSP00000357283,9606.ENSP00000364935,9606.ENSP00000378760,9606.ENSP00000384863,9606.ENSP00000398610,9606.ENSP00000433760,9606.ENSP00000496954	IPO5,AMBP,TMPO,PML,CALR,VAPA,MGST3,LMNA,CLIC1,MVP,XPO1,ANXA11,BANF1,MYO1C
GO:0030659	Cytoplasmic vesicle membrane	34	1190	2.85714	0.42	9.59e-06	9606.ENSP00000261263,9606.ENSP00000268058,9606.ENSP00000268182,9606.ENSP00000283415,9606.ENSP00000286713,9606.ENSP00000297258,9606.ENSP00000300289,9606.ENSP00000319096,9606.ENSP00000320866,9606.ENSP00000325002,9606.ENSP00000329419,9606.ENSP00000333298,9606.ENSP00000338844,9606.ENSP00000345656,9606.ENSP00000346032,9606.ENSP00000346550,9606.ENSP00000353099,9606.ENSP00000362807,9606.ENSP00000365402,…	RAB21,PML,IQGAP1,LPCAT1,STOM,FABP5,PDIA3,RAP2B,CALR,COPG1,COPB2,LAMP1,SEC23B,VAPA,ANXA2,ANXA6,HLA-DRB1,PEF1,HLA-C,AP1G1,FOLR1,PSAP,ITGB1,CD14,TF,CD44,HSPA8,DNM1L,COPE,CLTC,SNX12,AP2B1,SERPINB6,MYO1C
GO:0099512	Supramolecular fiber	28	1000	2.8	0.42	0.00014	9606.ENSP00000216181,9606.ENSP00000252699,9606.ENSP00000258198,9606.ENSP00000262418,9606.ENSP00000268182,9606.ENSP00000280326,9606.ENSP00000295550,9606.ENSP00000323856,9606.ENSP00000325527,9606.ENSP00000348163,9606.ENSP00000349259,9606.ENSP00000353099,9606.ENSP00000353375,9606.ENSP00000354251,9606.ENSP00000355180,9606.ENSP00000357283,9606.ENSP00000358081,9606.ENSP00000360305,9606.ENSP00000377941,…	MYH9,ACTN4,DYNC1LI2,SLC4A1,IQGAP1,CCT5,COL6A3,PLEC,FBN1,PLS3,SPTBN1,HLA-DRB1,MAP4,NCKAP1,COL6A1,LMNA,BAG3,PDLIM1,ACTN1,CCT4,MYH11,LCP1,MYH8,DNM1L,CLTC,ALDOA,TPM2,MYO1C
GO:0010008	Endosome membrane	15	540	2.77778	0.41	0.0152	9606.ENSP00000261263,9606.ENSP00000268058,9606.ENSP00000300289,9606.ENSP00000319096,9606.ENSP00000333298,9606.ENSP00000346032,9606.ENSP00000346550,9606.ENSP00000353099,9606.ENSP00000365402,9606.ENSP00000379350,9606.ENSP00000385519,9606.ENSP00000385834,9606.ENSP00000479606,9606.ENSP00000481314,9606.ENSP00000483185	RAB21,PML,PDIA3,RAP2B,LAMP1,ANXA2,ANXA6,HLA-DRB1,HLA-C,ITGB1,CD14,TF,CLTC,SNX12,AP2B1
GO:0030054	Cell junction	54	2115	2.55319	0.38	7.62e-08	9606.ENSP00000216181,9606.ENSP00000226299,9606.ENSP00000241052,9606.ENSP00000247970,9606.ENSP00000252699,9606.ENSP00000252999,9606.ENSP00000261263,9606.ENSP00000267257,9606.ENSP00000268182,9606.ENSP00000278572,9606.ENSP00000297258,9606.ENSP00000297991,9606.ENSP00000300289,9606.ENSP00000306099,9606.ENSP00000306330,9606.ENSP00000311430,9606.ENSP00000313199,9606.ENSP00000316029,9606.ENSP00000319096,…	MYH9,LAP3,CAT,PIN1,ACTN4,LAMA5,RAB21,PXN,IQGAP1,RPS3,FABP5,AQP3,PDIA3,FGB,YWHAG,RPL4,HNRNPD,TLN1,RAP2B,CALR,PLEC,ZYX,TMED9,LAMP1,PARK7,PPL,VAPA,ANXA2,ANXA6,SPTBN1,NCKAP1,MPP1,PDLIM1,HSPG2,HSPA1A,GDI2,YWHAQ,ACTN1,ITGB1,LCP1,IFI30,ARPC1B,CD44,MPST,EIF4G1,PPIA,SEPTIN11,HSPA8,DNM1L,CNN2,CLTC,AP2B1,SPTAN1,SPTA1
GO:0005768	Endosome	26	1030	2.52427	0.37	0.0014	9606.ENSP00000231751,9606.ENSP00000258198,9606.ENSP00000261263,9606.ENSP00000268058,9606.ENSP00000300289,9606.ENSP00000319096,9606.ENSP00000333298,9606.ENSP00000340019,9606.ENSP00000345347,9606.ENSP00000345672,9606.ENSP00000346032,9606.ENSP00000346550,9606.ENSP00000353099,9606.ENSP00000356969,9606.ENSP00000365402,9606.ENSP00000377148,9606.ENSP00000377284,9606.ENSP00000378394,9606.ENSP00000379350,…	LTF,DYNC1LI2,RAB21,PML,PDIA3,RAP2B,LAMP1,HSPD1,HMGB1,CTSB,ANXA2,ANXA6,HLA-DRB1,APOA2,HLA-C,AP1G1,FOLR1,PSAP,ITGB1,CD14,TF,HSPA8,F8A3,CLTC,SNX12,AP2B1
GO:0099080	Supramolecular complex	33	1366	2.41581	0.35	0.00033	9606.ENSP00000044462,9606.ENSP00000216181,9606.ENSP00000252699,9606.ENSP00000254810,9606.ENSP00000258198,9606.ENSP00000262418,9606.ENSP00000268182,9606.ENSP00000280326,9606.ENSP00000295550,9606.ENSP00000323856,9606.ENSP00000325527,9606.ENSP00000348163,9606.ENSP00000349259,9606.ENSP00000353099,9606.ENSP00000353375,9606.ENSP00000353654,9606.ENSP00000354251,9606.ENSP00000355180,9606.ENSP00000357283,…	PSMA4,MYH9,ACTN4,H3-3B,DYNC1LI2,SLC4A1,IQGAP1,CCT5,COL6A3,PLEC,FBN1,PLS3,SPTBN1,HLA-DRB1,MAP4,COL4A2,NCKAP1,COL6A1,LMNA,BAG3,PDLIM1,ACTN1,CCT4,MYH11,LCP1,MYH8,XPO1,EIF4G1,DNM1L,CLTC,ALDOA,TPM2,MYO1C
GO:0098796	Membrane protein complex	29	1218	2.38095	0.34	0.0014	9606.ENSP00000263408,9606.ENSP00000300289,9606.ENSP00000320866,9606.ENSP00000325002,9606.ENSP00000329419,9606.ENSP00000338844,9606.ENSP00000339720,9606.ENSP00000340019,9606.ENSP00000345347,9606.ENSP00000346032,9606.ENSP00000353099,9606.ENSP00000358460,9606.ENSP00000362807,9606.ENSP00000363162,9606.ENSP00000363827,9606.ENSP00000364935,9606.ENSP00000365402,9606.ENSP00000369677,9606.ENSP00000377148,…	C9,PDIA3,CALR,COPG1,COPB2,SEC23B,NDUFA4,HSPD1,HMGB1,ANXA2,HLA-DRB1,CLIC2,PEF1,ATP6V1G1,HSPG2,CLIC1,HLA-C,EMILIN1,AP1G1,ITGB1,CD14,TF,COX7C,OSTC,COX6B1,COPE,CLTC,SNX12,AP2B1
GO:0005783	Endoplasmic reticulum	47	2021	2.32558	0.33	1.34e-05	9606.ENSP00000216714,9606.ENSP00000223136,9606.ENSP00000241052,9606.ENSP00000245907,9606.ENSP00000261263,9606.ENSP00000264613,9606.ENSP00000265132,9606.ENSP00000268058,9606.ENSP00000273986,9606.ENSP00000278572,9606.ENSP00000283415,9606.ENSP00000286713,9606.ENSP00000295550,9606.ENSP00000295897,9606.ENSP00000300289,9606.ENSP00000303920,9606.ENSP00000306099,9606.ENSP00000308541,9606.ENSP00000311430,…	APEX1,FIS1,CAT,C3,RAB21,CP,AMBP,PML,CISD2,RPS3,LPCAT1,STOM,COL6A3,ALB,PDIA3,MZB1,FGB,F2,RPL4,CALR,COPG1,FBN1,COPB2,TMED9,FGG,SEC23B,PARK7,VAPA,HLA-DRB1,COL4A2,COL6A1,MGST3,APOA2,CNPY3,PEF1,HSPA1A,HLA-C,RRBP1,FOLR1,TF,OSTC,DNM1L,NPC2,SPON1,COPE,EPHX1,FGA
GO:0005829	Cytosol	123	5438	2.26186	0.32	3.38e-18	9606.ENSP00000044462,9606.ENSP00000210313,9606.ENSP00000216181,9606.ENSP00000221418,9606.ENSP00000223136,9606.ENSP00000226299,9606.ENSP00000229268,9606.ENSP00000241052,9606.ENSP00000247970,9606.ENSP00000252603,9606.ENSP00000252699,9606.ENSP00000253039,9606.ENSP00000258198,9606.ENSP00000258317,9606.ENSP00000261263,9606.ENSP00000261313,9606.ENSP00000261772,9606.ENSP00000263368,9606.ENSP00000263401,…	PSMA4,PSMD5,MYH9,ECH1,FIS1,LAP3,USP5,CAT,PIN1,PGLS,ACTN4,EIF2S3,DYNC1LI2,NPL,RAB21,PEBP1,AARS1,BLVRB,COMMD9,AMBP,PXN,PML,IQGAP1,COPS3,SOD1,RPS3,CCT5,GPD1L,FABP5,HPRT1,CKB,HINT1,YWHAG,ADH1B,RPL4,HNRNPD,GRHPR,PFAS,TLN1,RAP2B,CALR,TALDO1,PLEC,ZYX,COPG1,COPB2,EEF1G,LAMP1,ISYNA1,SEC23B,EEF1A1,HSPD1,PARK7,PPL,MAOA,SFN,PRDX6,SNRPD2,VAPA,ANXA2,SND1,ALDH9A1,WARS1,PLS3,SPTBN1,RPE,NCKAP1,APOA2,LMNA,BAG3,CLI…
GO:0012505	Endomembrane system	107	4721	2.26647	0.32	1.07e-14	9606.ENSP00000216181,9606.ENSP00000216714,9606.ENSP00000223136,9606.ENSP00000225275,9606.ENSP00000226299,9606.ENSP00000231751,9606.ENSP00000241052,9606.ENSP00000245907,9606.ENSP00000252699,9606.ENSP00000258198,9606.ENSP00000259396,9606.ENSP00000261263,9606.ENSP00000261574,9606.ENSP00000263401,9606.ENSP00000264613,9606.ENSP00000265132,9606.ENSP00000266732,9606.ENSP00000268058,9606.ENSP00000268182,…	MYH9,APEX1,FIS1,MPO,LAP3,LTF,CAT,C3,ACTN4,DYNC1LI2,ORM1,RAB21,IPO5,COMMD9,CP,AMBP,TMPO,PML,IQGAP1,SOD1,CISD2,RPS3,LPCAT1,STOM,COL6A3,ALB,PPBP,FABP5,PDIA3,MZB1,FGB,F2,RPL4,RAP2B,CALR,SERPINF2,A2M,COPG1,FBN1,BGN,DEFA3,COPB2,TMED9,LAMP1,FGG,SEC23B,EEF1A1,HSPD1,PARK7,PRDX6,HMGB1,VAPA,CTSB,ANXA2,ANXA6,HP,HLA-DRB1,COL4A2,COL6A1,MGST3,APOA2,LMNA,PGAM1,HSP90AB1,CNPY3,PEF1,HSPG2,HSPA1A,CLIC1,HLA-C,RRBP1,G…
GO:0031967	Organelle envelope	28	1262	2.2187	0.31	0.0052	9606.ENSP00000223136,9606.ENSP00000241052,9606.ENSP00000261574,9606.ENSP00000265132,9606.ENSP00000266732,9606.ENSP00000268058,9606.ENSP00000270142,9606.ENSP00000273986,9606.ENSP00000278572,9606.ENSP00000320866,9606.ENSP00000323856,9606.ENSP00000339720,9606.ENSP00000340019,9606.ENSP00000340278,9606.ENSP00000340684,9606.ENSP00000345656,9606.ENSP00000356864,9606.ENSP00000357283,9606.ENSP00000364935,…	FIS1,CAT,IPO5,AMBP,TMPO,PML,SOD1,CISD2,RPS3,CALR,PLEC,NDUFA4,HSPD1,PARK7,MAOA,VAPA,MGST3,LMNA,CLIC1,MVP,XPO1,OGDH,ANXA11,COX7C,BANF1,DNM1L,COX6B1,MYO1C
GO:0098588	Bounding membrane of organelle	45	2125	2.11765	0.29	0.00023	9606.ENSP00000223136,9606.ENSP00000241052,9606.ENSP00000261263,9606.ENSP00000264613,9606.ENSP00000268058,9606.ENSP00000268182,9606.ENSP00000273986,9606.ENSP00000283415,9606.ENSP00000286713,9606.ENSP00000297258,9606.ENSP00000300289,9606.ENSP00000319096,9606.ENSP00000320866,9606.ENSP00000323856,9606.ENSP00000325002,9606.ENSP00000329419,9606.ENSP00000330945,9606.ENSP00000333298,9606.ENSP00000338844,…	FIS1,CAT,RAB21,CP,PML,IQGAP1,CISD2,LPCAT1,STOM,FABP5,PDIA3,RAP2B,CALR,PLEC,COPG1,COPB2,TMED9,LAMP1,SEC23B,EEF1A1,MAOA,VAPA,ANXA2,ANXA6,HLA-DRB1,COL6A1,HSP90AB1,PEF1,ATP6V1G1,HLA-C,AP1G1,FOLR1,PSAP,ITGB1,CD14,TF,CD44,GPI,HSPA8,DNM1L,COPE,CLTC,SNX12,AP2B1,SERPINB6
GO:0032991	Protein-containing complex	114	5506	2.07047	0.28	3.3e-13	9606.ENSP00000044462,9606.ENSP00000210313,9606.ENSP00000216181,9606.ENSP00000216714,9606.ENSP00000223136,9606.ENSP00000231751,9606.ENSP00000241052,9606.ENSP00000245907,9606.ENSP00000252699,9606.ENSP00000252999,9606.ENSP00000253039,9606.ENSP00000254810,9606.ENSP00000258198,9606.ENSP00000261574,9606.ENSP00000263408,9606.ENSP00000264690,9606.ENSP00000267257,9606.ENSP00000268182,9606.ENSP00000268717,…	PSMA4,PSMD5,MYH9,APEX1,FIS1,LTF,CAT,C3,ACTN4,LAMA5,EIF2S3,H3-3B,DYNC1LI2,IPO5,C9,KLKB1,PXN,IQGAP1,COPS3,SOD1,CISD2,RPS3,CCT5,GPD1L,COL6A3,ALB,PDIA3,MZB1,HINT1,FGB,F2,RPL4,HNRNPD,GRHPR,CALR,SERPINF2,COPG1,COPB2,FGG,SEC23B,EEF1A1,NDUFA4,HSPD1,SNRPD2,HMGB1,CTSB,ANXA2,SND1,WARS1,HP,SPTBN1,HLA-DRB1,MAP4,COL4A2,NCKAP1,COL6A1,CFH,APOA2,BAG3,CLIC2,PDLIM1,HSP90AB1,PEF1,ATP6V1G1,HMGCL,HSPG2,HSPA1A,CLIC1,HL…
GO:0005856	Cytoskeleton	49	2369	2.06838	0.28	0.00016	9606.ENSP00000216181,9606.ENSP00000216714,9606.ENSP00000246069,9606.ENSP00000247970,9606.ENSP00000252699,9606.ENSP00000258198,9606.ENSP00000262418,9606.ENSP00000267257,9606.ENSP00000268182,9606.ENSP00000278572,9606.ENSP00000280326,9606.ENSP00000286713,9606.ENSP00000304229,9606.ENSP00000316029,9606.ENSP00000323856,9606.ENSP00000324422,9606.ENSP00000339063,9606.ENSP00000340510,9606.ENSP00000345656,…	MYH9,APEX1,DSTN,PIN1,ACTN4,DYNC1LI2,SLC4A1,PXN,IQGAP1,RPS3,CCT5,STOM,HINT1,TLN1,PLEC,ZYX,EEF1A1,PPL,VAPA,PLS3,SPTBN1,HLA-DRB1,MAP4,NCKAP1,LMNA,BAG3,MPP1,PDLIM1,HSPA1A,MTPN,NIT2,ACTN1,CCT4,MVP,MYH11,LCP1,MYH8,ARPC1B,ANXA11,SEPTIN11,MYL6,DNM1L,CNN2,CLTC,SPTAN1,SPTA1,ALDOA,TPM2,MYO1C
GO:0098590	Plasma membrane region	25	1237	2.02102	0.27	0.0308	9606.ENSP00000216181,9606.ENSP00000261263,9606.ENSP00000262418,9606.ENSP00000278572,9606.ENSP00000297991,9606.ENSP00000316029,9606.ENSP00000339063,9606.ENSP00000340019,9606.ENSP00000345672,9606.ENSP00000346032,9606.ENSP00000349259,9606.ENSP00000354251,9606.ENSP00000360609,9606.ENSP00000363162,9606.ENSP00000377284,9606.ENSP00000379350,9606.ENSP00000381581,9606.ENSP00000385834,9606.ENSP00000398632,…	MYH9,RAB21,SLC4A1,RPS3,AQP3,TLN1,EEF1A1,HSPD1,CTSB,ANXA2,SPTBN1,NCKAP1,HSP90AB1,ATP6V1G1,FOLR1,ITGB1,LCP1,TF,CD44,GPI,HSPA8,DNM1L,CLTC,AP2B1,MYO1C
GO:0005739	Mitochondrion	33	1681	1.96312	0.26	0.0108	9606.ENSP00000216714,9606.ENSP00000221418,9606.ENSP00000223136,9606.ENSP00000241052,9606.ENSP00000261772,9606.ENSP00000265132,9606.ENSP00000270142,9606.ENSP00000273986,9606.ENSP00000278572,9606.ENSP00000285093,9606.ENSP00000286713,9606.ENSP00000299198,9606.ENSP00000301329,9606.ENSP00000323856,9606.ENSP00000327070,9606.ENSP00000339720,9606.ENSP00000340019,9606.ENSP00000340278,9606.ENSP00000340684,…	APEX1,ECH1,FIS1,CAT,AARS1,AMBP,SOD1,CISD2,RPS3,ACAA2,STOM,CKB,GLOD4,PLEC,MDH2,NDUFA4,HSPD1,PARK7,MAOA,PRDX6,ANXA6,HSP90AB1,HMGCL,HSPA1A,CLIC1,ACOT9,HAGH,OGDH,MPST,COX7C,DNM1L,COX6B1,GATD3B
GO:0070013	Intracellular organelle lumen	103	5660	1.81979	0.23	5.34e-08	9606.ENSP00000044462,9606.ENSP00000210313,9606.ENSP00000216181,9606.ENSP00000216714,9606.ENSP00000221418,9606.ENSP00000225275,9606.ENSP00000226299,9606.ENSP00000231751,9606.ENSP00000241052,9606.ENSP00000245907,9606.ENSP00000247970,9606.ENSP00000252699,9606.ENSP00000254810,9606.ENSP00000259396,9606.ENSP00000261574,9606.ENSP00000263368,9606.ENSP00000263401,9606.ENSP00000264613,9606.ENSP00000265983,…	PSMA4,PSMD5,MYH9,APEX1,ECH1,MPO,LAP3,LTF,CAT,C3,PIN1,ACTN4,H3-3B,ORM1,IPO5,BLVRB,COMMD9,CP,HPX,PML,COPS3,SOD1,RPS3,ACAA2,COL6A3,ALB,PPBP,FABP5,AQP3,PDIA3,MZB1,HINT1,FGB,ADH1B,F2,RPL4,HNRNPD,GRHPR,CALR,SERPINF2,A2M,FBN1,MDH2,BGN,DEFA3,FGG,EEF1A1,HSPD1,PARK7,PRDX6,SNRPD2,HMGB1,CTSB,ANXA2,HP,SPTBN1,COL4A2,COL6A1,APOA2,LMNA,CLIC2,PGAM1,HSP90AB1,CNPY3,HMGCL,HSPG2,HSPA1A,ACOT9,GDI2,CPPED1,NIT2,ACTN1,CC…
GO:0031090	Organelle membrane	61	3673	1.66077	0.19	0.0049	9606.ENSP00000223136,9606.ENSP00000241052,9606.ENSP00000261263,9606.ENSP00000264613,9606.ENSP00000265132,9606.ENSP00000266732,9606.ENSP00000268058,9606.ENSP00000268182,9606.ENSP00000273986,9606.ENSP00000278572,9606.ENSP00000283415,9606.ENSP00000286713,9606.ENSP00000297258,9606.ENSP00000300289,9606.ENSP00000319096,9606.ENSP00000320866,9606.ENSP00000323856,9606.ENSP00000325002,9606.ENSP00000329419,…	FIS1,CAT,RAB21,CP,AMBP,TMPO,PML,IQGAP1,CISD2,RPS3,LPCAT1,STOM,FABP5,PDIA3,RAP2B,CALR,PLEC,COPG1,COPB2,TMED9,LAMP1,SEC23B,EEF1A1,NDUFA4,HSPD1,MAOA,VAPA,ANXA2,ANXA6,HLA-DRB1,COL6A1,MGST3,LMNA,HSP90AB1,PEF1,ATP6V1G1,CLIC1,HLA-C,RRBP1,AP1G1,FOLR1,PSAP,ITGB1,XPO1,CD14,TF,OGDH,CD44,GPI,COX7C,OSTC,HSPA8,DNM1L,COX6B1,COPE,CLTC,EPHX1,SNX12,AP2B1,SERPINB6,MYO1C
GO:0005737	Cytoplasm	196	12056	1.62575	0.18	5.87e-23	9606.ENSP00000044462,9606.ENSP00000210313,9606.ENSP00000216181,9606.ENSP00000216714,9606.ENSP00000221418,9606.ENSP00000222219,9606.ENSP00000223136,9606.ENSP00000225275,9606.ENSP00000226299,9606.ENSP00000229268,9606.ENSP00000231751,9606.ENSP00000241052,9606.ENSP00000245907,9606.ENSP00000246069,9606.ENSP00000247970,9606.ENSP00000252603,9606.ENSP00000252699,9606.ENSP00000253039,9606.ENSP00000258198,…	PSMA4,PSMD5,MYH9,APEX1,ECH1,DNASE2,FIS1,MPO,LAP3,USP5,LTF,CAT,C3,DSTN,PIN1,PGLS,ACTN4,EIF2S3,DYNC1LI2,NPL,ORM1,RAB21,PEBP1,IPO5,AARS1,SLC4A1,BLVRB,COMMD9,CP,AMBP,HPX,TMPO,PXN,PML,IQGAP1,COPS3,SOD1,CISD2,RPS3,CCT5,GPD1L,LPCAT1,ACAA2,STOM,COL6A3,ALB,PPBP,FABP5,AQP3,HPRT1,CKB,PDIA3,GLOD4,MZB1,HINT1,FGB,YWHAG,ADH1B,F2,GMPPB,RPL4,HNRNPD,GRHPR,PFAS,TLN1,RAP2B,CALR,TALDO1,SERPINF2,PLEC,A2M,ZYX,COPG1,FBN…
GO:0071944	Cell periphery	92	6015	1.52951	0.15	0.0013	9606.ENSP00000216181,9606.ENSP00000231751,9606.ENSP00000241052,9606.ENSP00000245907,9606.ENSP00000246069,9606.ENSP00000252699,9606.ENSP00000252999,9606.ENSP00000259396,9606.ENSP00000261263,9606.ENSP00000262418,9606.ENSP00000263368,9606.ENSP00000263408,9606.ENSP00000264613,9606.ENSP00000264690,9606.ENSP00000265132,9606.ENSP00000265983,9606.ENSP00000267257,9606.ENSP00000268182,9606.ENSP00000270233,…	MYH9,LTF,CAT,C3,DSTN,ACTN4,LAMA5,ORM1,RAB21,SLC4A1,BLVRB,C9,CP,KLKB1,AMBP,HPX,PXN,IQGAP1,BCAM,RPS3,GPD1L,LPCAT1,STOM,COL6A3,FABP5,AQP3,FOLR2,HINT1,FGB,ADH1B,F2,TLN1,RAP2B,CALR,SERPINF2,PLEC,A2M,ZYX,FBN1,BGN,LAMP1,FGG,EEF1A1,HSPD1,PARK7,PPL,HMGB1,VAPA,CTSB,ANXA2,ANXA6,PLS3,SPTBN1,SUSD2,HLA-DRB1,COL4A2,NCKAP1,COL6A1,CLIC2,MPP1,HSP90AB1,ATP6V1G1,HSPG2,HSPA1A,CLIC1,HLA-C,EMILIN1,CPPED1,FOLR1,ACTN1,PS…
GO:0043226	Organelle	206	14017	1.46964	0.14	5.19e-21	9606.ENSP00000044462,9606.ENSP00000210313,9606.ENSP00000216181,9606.ENSP00000216714,9606.ENSP00000221418,9606.ENSP00000222219,9606.ENSP00000223136,9606.ENSP00000225275,9606.ENSP00000226299,9606.ENSP00000229268,9606.ENSP00000231751,9606.ENSP00000241052,9606.ENSP00000245907,9606.ENSP00000246069,9606.ENSP00000247970,9606.ENSP00000252603,9606.ENSP00000252699,9606.ENSP00000252999,9606.ENSP00000253039,…	PSMA4,PSMD5,MYH9,APEX1,ECH1,DNASE2,FIS1,MPO,LAP3,USP5,LTF,CAT,C3,DSTN,PIN1,PGLS,ACTN4,LAMA5,EIF2S3,H3-3B,DYNC1LI2,ORM1,RAB21,PEBP1,IPO5,AARS1,SLC4A1,BLVRB,COMMD9,C9,CP,KLKB1,AMBP,HPX,TMPO,PXN,PML,IQGAP1,COPS3,SOD1,BCAM,CISD2,RPS3,CCT5,GPD1L,LPCAT1,ACAA2,STOM,COL6A3,ALB,PPBP,FABP5,AQP3,HPRT1,CKB,PDIA3,GLOD4,MZB1,HINT1,FGB,YWHAG,ADH1B,F2,RPL4,HNRNPD,GRHPR,PFAS,TLN1,RAP2B,CALR,TALDO1,SERPINF2,PLEC,A…
GO:0043227	Membrane-bounded organelle	198	13188	1.50136	0.14	3.02e-18	9606.ENSP00000044462,9606.ENSP00000210313,9606.ENSP00000216181,9606.ENSP00000216714,9606.ENSP00000221418,9606.ENSP00000222219,9606.ENSP00000223136,9606.ENSP00000225275,9606.ENSP00000226299,9606.ENSP00000229268,9606.ENSP00000231751,9606.ENSP00000241052,9606.ENSP00000245907,9606.ENSP00000246069,9606.ENSP00000247970,9606.ENSP00000252603,9606.ENSP00000252699,9606.ENSP00000252999,9606.ENSP00000253039,…	PSMA4,PSMD5,MYH9,APEX1,ECH1,DNASE2,FIS1,MPO,LAP3,USP5,LTF,CAT,C3,DSTN,PIN1,PGLS,ACTN4,LAMA5,EIF2S3,H3-3B,DYNC1LI2,ORM1,RAB21,PEBP1,IPO5,AARS1,SLC4A1,BLVRB,COMMD9,C9,CP,KLKB1,AMBP,HPX,TMPO,PML,IQGAP1,COPS3,SOD1,BCAM,CISD2,RPS3,CCT5,GPD1L,LPCAT1,ACAA2,STOM,COL6A3,ALB,PPBP,FABP5,AQP3,HPRT1,CKB,PDIA3,GLOD4,MZB1,HINT1,FGB,YWHAG,ADH1B,F2,RPL4,HNRNPD,GRHPR,PFAS,TLN1,RAP2B,CALR,TALDO1,SERPINF2,PLEC,A2M,Z…
GO:0005886	Plasma membrane	80	5544	1.443	0.13	0.0254	9606.ENSP00000216181,9606.ENSP00000231751,9606.ENSP00000241052,9606.ENSP00000245907,9606.ENSP00000252699,9606.ENSP00000261263,9606.ENSP00000262418,9606.ENSP00000263368,9606.ENSP00000263408,9606.ENSP00000264613,9606.ENSP00000264690,9606.ENSP00000265132,9606.ENSP00000267257,9606.ENSP00000268182,9606.ENSP00000270233,9606.ENSP00000278572,9606.ENSP00000282541,9606.ENSP00000283415,9606.ENSP00000286713,…	MYH9,LTF,CAT,C3,ACTN4,RAB21,SLC4A1,BLVRB,C9,CP,KLKB1,AMBP,PXN,IQGAP1,BCAM,RPS3,GPD1L,LPCAT1,STOM,COL6A3,FABP5,AQP3,FOLR2,HINT1,FGB,ADH1B,F2,TLN1,RAP2B,CALR,PLEC,ZYX,BGN,LAMP1,FGG,EEF1A1,HSPD1,PARK7,PPL,HMGB1,VAPA,CTSB,ANXA2,PLS3,SPTBN1,SUSD2,HLA-DRB1,NCKAP1,COL6A1,CLIC2,MPP1,HSP90AB1,ATP6V1G1,HSPG2,HSPA1A,CLIC1,HLA-C,EMILIN1,CPPED1,FOLR1,ACTN1,PSAP,ITGB1,LCP1,CD14,TF,PCYOX1,CD44,GPI,CFB,HSPA8,DNM…
GO:0043229	Intracellular organelle	182	13231	1.37556	0.11	2.87e-08	9606.ENSP00000044462,9606.ENSP00000210313,9606.ENSP00000216181,9606.ENSP00000216714,9606.ENSP00000221418,9606.ENSP00000222219,9606.ENSP00000223136,9606.ENSP00000225275,9606.ENSP00000226299,9606.ENSP00000229268,9606.ENSP00000231751,9606.ENSP00000241052,9606.ENSP00000245907,9606.ENSP00000246069,9606.ENSP00000247970,9606.ENSP00000252699,9606.ENSP00000252999,9606.ENSP00000254810,9606.ENSP00000258198,…	PSMA4,PSMD5,MYH9,APEX1,ECH1,DNASE2,FIS1,MPO,LAP3,USP5,LTF,CAT,C3,DSTN,PIN1,ACTN4,LAMA5,H3-3B,DYNC1LI2,ORM1,RAB21,PEBP1,IPO5,AARS1,SLC4A1,BLVRB,COMMD9,CP,AMBP,HPX,TMPO,PXN,PML,IQGAP1,COPS3,SOD1,CISD2,RPS3,CCT5,LPCAT1,ACAA2,STOM,COL6A3,ALB,PPBP,FABP5,AQP3,CKB,PDIA3,GLOD4,MZB1,HINT1,FGB,ADH1B,F2,RPL4,HNRNPD,GRHPR,TLN1,RAP2B,CALR,TALDO1,SERPINF2,PLEC,A2M,ZYX,COPG1,FBN1,MDH2,BGN,DEFA3,COPB2,TMED9,EEF1…
GO:0016020	Membrane	131	9523	1.37562	0.11	0.0014	9606.ENSP00000216181,9606.ENSP00000221418,9606.ENSP00000223136,9606.ENSP00000231751,9606.ENSP00000241052,9606.ENSP00000245907,9606.ENSP00000252699,9606.ENSP00000258198,9606.ENSP00000261263,9606.ENSP00000261574,9606.ENSP00000261772,9606.ENSP00000262418,9606.ENSP00000263368,9606.ENSP00000263408,9606.ENSP00000264613,9606.ENSP00000264690,9606.ENSP00000265132,9606.ENSP00000266732,9606.ENSP00000267257,…	MYH9,ECH1,FIS1,LTF,CAT,C3,ACTN4,DYNC1LI2,RAB21,IPO5,AARS1,SLC4A1,BLVRB,C9,CP,KLKB1,AMBP,TMPO,PXN,PML,IQGAP1,BCAM,CISD2,RPS3,GPD1L,LPCAT1,STOM,COL6A3,FABP5,AQP3,FOLR2,PDIA3,HINT1,FGB,YWHAG,ADH1B,F2,RPL4,TLN1,RAP2B,CALR,PLEC,ZYX,COPG1,MDH2,BGN,COPB2,TMED9,EEF1G,LAMP1,FGG,SEC23B,EEF1A1,NDUFA4,HSPD1,PARK7,PPL,MAOA,PRDX6,HMGB1,VAPA,CTSB,ANXA2,ANXA6,SND1,PLS3,SPTBN1,SUSD2,HLA-DRB1,COL4A2,NCKAP1,COL6A1,…
GO:0005622	Intracellular anatomical structure	200	14891	1.34309	0.1	3.33e-11	9606.ENSP00000044462,9606.ENSP00000210313,9606.ENSP00000216181,9606.ENSP00000216714,9606.ENSP00000221418,9606.ENSP00000222219,9606.ENSP00000223136,9606.ENSP00000225275,9606.ENSP00000226299,9606.ENSP00000229268,9606.ENSP00000231751,9606.ENSP00000241052,9606.ENSP00000245907,9606.ENSP00000246069,9606.ENSP00000247970,9606.ENSP00000252603,9606.ENSP00000252699,9606.ENSP00000252999,9606.ENSP00000253039,…	PSMA4,PSMD5,MYH9,APEX1,ECH1,DNASE2,FIS1,MPO,LAP3,USP5,LTF,CAT,C3,DSTN,PIN1,PGLS,ACTN4,LAMA5,EIF2S3,H3-3B,DYNC1LI2,NPL,ORM1,RAB21,PEBP1,IPO5,AARS1,SLC4A1,BLVRB,COMMD9,CP,AMBP,HPX,TMPO,PXN,PML,IQGAP1,COPS3,SOD1,CISD2,RPS3,CCT5,GPD1L,LPCAT1,ACAA2,STOM,COL6A3,ALB,PPBP,FABP5,AQP3,HPRT1,CKB,PDIA3,GLOD4,MZB1,HINT1,FGB,YWHAG,ADH1B,F2,GMPPB,RPL4,HNRNPD,GRHPR,PFAS,TLN1,RAP2B,CALR,TALDO1,SERPINF2,PLEC,A2M,Z…
GO:0043231	Intracellular membrane-bounded organelle	165	12149	1.35814	0.1	1.44e-05	9606.ENSP00000044462,9606.ENSP00000210313,9606.ENSP00000216181,9606.ENSP00000216714,9606.ENSP00000221418,9606.ENSP00000222219,9606.ENSP00000223136,9606.ENSP00000225275,9606.ENSP00000226299,9606.ENSP00000229268,9606.ENSP00000231751,9606.ENSP00000241052,9606.ENSP00000245907,9606.ENSP00000247970,9606.ENSP00000252699,9606.ENSP00000252999,9606.ENSP00000254810,9606.ENSP00000258198,9606.ENSP00000259396,…	PSMA4,PSMD5,MYH9,APEX1,ECH1,DNASE2,FIS1,MPO,LAP3,USP5,LTF,CAT,C3,PIN1,ACTN4,LAMA5,H3-3B,DYNC1LI2,ORM1,RAB21,PEBP1,IPO5,AARS1,BLVRB,COMMD9,CP,AMBP,HPX,TMPO,PML,IQGAP1,COPS3,SOD1,CISD2,RPS3,LPCAT1,ACAA2,STOM,COL6A3,ALB,PPBP,FABP5,AQP3,CKB,PDIA3,GLOD4,MZB1,HINT1,FGB,ADH1B,F2,RPL4,HNRNPD,GRHPR,RAP2B,CALR,TALDO1,SERPINF2,PLEC,A2M,ZYX,COPG1,FBN1,MDH2,BGN,DEFA3,COPB2,TMED9,EEF1G,LAMP1,FGG,SEC23B,EEF1A1,…
GO:0110165	Cellular anatomical entity	212	18293	1.15891	0.03	6.54e-06	9606.ENSP00000044462,9606.ENSP00000210313,9606.ENSP00000216181,9606.ENSP00000216714,9606.ENSP00000221418,9606.ENSP00000222219,9606.ENSP00000223136,9606.ENSP00000225275,9606.ENSP00000226299,9606.ENSP00000229268,9606.ENSP00000231751,9606.ENSP00000241052,9606.ENSP00000245907,9606.ENSP00000246069,9606.ENSP00000247970,9606.ENSP00000252603,9606.ENSP00000252699,9606.ENSP00000252999,9606.ENSP00000253039,…	PSMA4,PSMD5,MYH9,APEX1,ECH1,DNASE2,FIS1,MPO,LAP3,USP5,LTF,CAT,C3,DSTN,PIN1,PGLS,ACTN4,LAMA5,EIF2S3,H3-3B,DYNC1LI2,NPL,ORM1,RAB21,PEBP1,IPO5,AARS1,SLC4A1,BLVRB,COMMD9,C9,CP,KLKB1,AMBP,HPX,TMPO,PXN,PML,IQGAP1,COPS3,SOD1,BCAM,CISD2,RPS3,CCT5,GPD1L,LPCAT1,ACAA2,STOM,COL6A3,ALB,PPBP,FABP5,AQP3,FOLR2,HPRT1,CKB,PDIA3,GLOD4,MZB1,HINT1,FGB,YWHAG,ADH1B,F2,GMPPB,RPL4,HNRNPD,GRHPR,PFAS,TLN1,RAP2B,CALR,TALDO1…

## Sheet: GOCC_moreOx_Tumor
Term ID	Term description	Observed gene count	Background gene count	Genes (%)	Strength	FDR	Matching proteins (IDs)	Matching proteins (labels)
GO:0016507	Mitochondrial fatty acid beta-oxidation multienzyme complex	2	2	100	2.04	0.0084	9606.ENSP00000325136,9606.ENSP00000370023	HADHB,HADHA
GO:0000015	Phosphopyruvate hydratase complex	2	4	50	1.74	0.0181	9606.ENSP00000437402,9606.ENSP00000495530	ENO2,ENO1
GO:0008091	Spectrin	3	9	33.3333	1.56	0.0034	9606.ENSP00000349259,9606.ENSP00000357110,9606.ENSP00000495909	SPTBN1,EPB41L2,SPTB
GO:0014731	Spectrin-associated cytoskeleton	3	9	33.3333	1.56	0.0034	9606.ENSP00000265709,9606.ENSP00000349259,9606.ENSP00000495909	ANK1,SPTBN1,SPTB
GO:0005832	Chaperonin-containing T-complex	3	10	30	1.52	0.0041	9606.ENSP00000258091,9606.ENSP00000295688,9606.ENSP00000377958	CCT7,CCT3,CCT4
GO:0002199	Zona pellucida receptor complex	2	8	25	1.44	0.0471	9606.ENSP00000295688,9606.ENSP00000377958	CCT3,CCT4
GO:0008290	F-actin capping protein complex	2	8	25	1.44	0.0471	9606.ENSP00000264758,9606.ENSP00000354947	ADD1,CAPZA2
GO:0005940	Septin ring	3	14	21.4286	1.37	0.0082	9606.ENSP00000391249,9606.ENSP00000422896,9606.ENSP00000479861	SEPTIN9,SEPTIN11,SEPTIN2
GO:0031105	Septin complex	3	14	21.4286	1.37	0.0082	9606.ENSP00000391249,9606.ENSP00000422896,9606.ENSP00000479861	SEPTIN9,SEPTIN11,SEPTIN2
GO:0030127	COPII vesicle coat	3	15	20	1.34	0.009	9606.ENSP00000373312,9606.ENSP00000378721,9606.ENSP00000405926	SEC13,SEC31A,TMED7
GO:0030132	Clathrin coat of coated pit	3	15	20	1.34	0.009	9606.ENSP00000309415,9606.ENSP00000479606,9606.ENSP00000483185	CLTB,CLTC,AP2B1
GO:0030864	Cortical actin cytoskeleton	12	73	16.4384	1.26	1.06e-09	9606.ENSP00000216181,9606.ENSP00000219150,9606.ENSP00000252699,9606.ENSP00000268182,9606.ENSP00000312634,9606.ENSP00000339063,9606.ENSP00000349259,9606.ENSP00000357110,9606.ENSP00000361883,9606.ENSP00000377941,9606.ENSP00000427687,9606.ENSP00000495909	MYH9,CORO1A,ACTN4,IQGAP1,PDLIM2,EEF1A1,SPTBN1,EPB41L2,CAP1,ACTN1,WDR1,SPTB
GO:0031143	Pseudopodium	3	18	16.6667	1.26	0.0133	9606.ENSP00000215832,9606.ENSP00000252699,9606.ENSP00000377941	MAPK1,ACTN4,ACTN1
GO:0001725	Stress fiber	10	65	15.3846	1.23	7e-08	9606.ENSP00000216181,9606.ENSP00000252699,9606.ENSP00000312634,9606.ENSP00000360305,9606.ENSP00000377941,9606.ENSP00000391249,9606.ENSP00000420213,9606.ENSP00000422896,9606.ENSP00000491657,9606.ENSP00000498577	MYH9,ACTN4,PDLIM2,PDLIM1,ACTN1,SEPTIN9,FLNB,SEPTIN11,LPP,TPM3
GO:0042641	Actomyosin	11	72	15.2778	1.22	1.32e-08	9606.ENSP00000216181,9606.ENSP00000252699,9606.ENSP00000312634,9606.ENSP00000360305,9606.ENSP00000377941,9606.ENSP00000391249,9606.ENSP00000411825,9606.ENSP00000420213,9606.ENSP00000422896,9606.ENSP00000491657,9606.ENSP00000498577	MYH9,ACTN4,PDLIM2,PDLIM1,ACTN1,SEPTIN9,PDCD6IP,FLNB,SEPTIN11,LPP,TPM3
GO:0030863	Cortical cytoskeleton	15	102	14.7059	1.21	1.57e-11	9606.ENSP00000216181,9606.ENSP00000219150,9606.ENSP00000252699,9606.ENSP00000262418,9606.ENSP00000268182,9606.ENSP00000312634,9606.ENSP00000338934,9606.ENSP00000339063,9606.ENSP00000349259,9606.ENSP00000354947,9606.ENSP00000357110,9606.ENSP00000361883,9606.ENSP00000377941,9606.ENSP00000427687,9606.ENSP00000495909	MYH9,CORO1A,ACTN4,SLC4A1,IQGAP1,PDLIM2,EZR,EEF1A1,SPTBN1,CAPZA2,EPB41L2,CAP1,ACTN1,WDR1,SPTB
GO:0032432	Actin filament bundle	11	74	14.8649	1.21	1.66e-08	9606.ENSP00000216181,9606.ENSP00000252699,9606.ENSP00000312634,9606.ENSP00000358866,9606.ENSP00000360305,9606.ENSP00000377941,9606.ENSP00000391249,9606.ENSP00000420213,9606.ENSP00000422896,9606.ENSP00000491657,9606.ENSP00000498577	MYH9,ACTN4,PDLIM2,FLNA,PDLIM1,ACTN1,SEPTIN9,FLNB,SEPTIN11,LPP,TPM3
GO:0001891	Phagocytic cup	4	28	14.2857	1.19	0.0041	9606.ENSP00000219150,9606.ENSP00000366109,9606.ENSP00000373905,9606.ENSP00000426909	CORO1A,ANXA1,DNM2,RACK1
GO:0031941	Filamentous actin	4	29	13.7931	1.18	0.0045	9606.ENSP00000312634,9606.ENSP00000354251,9606.ENSP00000360305,9606.ENSP00000458162	PDLIM2,NCKAP1,PDLIM1,ACTG1
GO:0022627	Cytosolic small ribosomal subunit	6	44	13.6364	1.17	0.00017	9606.ENSP00000270625,9606.ENSP00000341885,9606.ENSP00000362744,9606.ENSP00000389351,9606.ENSP00000426909,9606.ENSP00000472985	RPS11,RPS2,RPS4X,RPSA,RACK1,RPS5
GO:0071682	Endocytic vesicle lumen	3	23	13.0435	1.15	0.0243	9606.ENSP00000335153,9606.ENSP00000348170,9606.ENSP00000494175	HSP90AA1,HP,HBB
GO:0031430	M band	3	24	12.5	1.14	0.0267	9606.ENSP00000265709,9606.ENSP00000349259,9606.ENSP00000495530	ANK1,SPTBN1,ENO1
GO:0030120	Vesicle coat	7	57	12.2807	1.13	5.8e-05	9606.ENSP00000309415,9606.ENSP00000357048,9606.ENSP00000373312,9606.ENSP00000378721,9606.ENSP00000405926,9606.ENSP00000479606,9606.ENSP00000483185	CLTB,COPA,SEC13,SEC31A,TMED7,CLTC,AP2B1
GO:0022626	Cytosolic ribosome	12	101	11.8812	1.11	2.4e-08	9606.ENSP00000270625,9606.ENSP00000341885,9606.ENSP00000346015,9606.ENSP00000346088,9606.ENSP00000354739,9606.ENSP00000359345,9606.ENSP00000362744,9606.ENSP00000379506,9606.ENSP00000389351,9606.ENSP00000426909,9606.ENSP00000428085,9606.ENSP00000472985	RPS11,RPS2,RPL27A,RPL22,RPL12,RPL5,RPS4X,RPL14,RPSA,RACK1,RPL30,RPS5
GO:1905370	Serine-type endopeptidase complex	3	26	11.5385	1.1	0.0317	9606.ENSP00000245907,9606.ENSP00000253496,9606.ENSP00000356399	C3,F12,CFH
GO:0022625	Cytosolic large ribosomal subunit	6	56	10.7143	1.07	0.00054	9606.ENSP00000346015,9606.ENSP00000346088,9606.ENSP00000354739,9606.ENSP00000359345,9606.ENSP00000379506,9606.ENSP00000428085	RPL27A,RPL22,RPL12,RPL5,RPL14,RPL30
GO:0005903	Brush border	11	106	10.3774	1.06	3.98e-07	9606.ENSP00000216181,9606.ENSP00000303356,9606.ENSP00000335153,9606.ENSP00000338934,9606.ENSP00000354947,9606.ENSP00000357051,9606.ENSP00000358866,9606.ENSP00000364935,9606.ENSP00000377941,9606.ENSP00000420213,9606.ENSP00000449089	MYH9,DCXR,HSP90AA1,EZR,CAPZA2,PEX19,FLNA,CLIC1,ACTN1,FLNB,DNM1L
GO:0030055	Cell-substrate junction	43	426	10.0939	1.04	1.42e-28	9606.ENSP00000215832,9606.ENSP00000216181,9606.ENSP00000225655,9606.ENSP00000226299,9606.ENSP00000252456,9606.ENSP00000252699,9606.ENSP00000264758,9606.ENSP00000268182,9606.ENSP00000270625,9606.ENSP00000279227,9606.ENSP00000305260,9606.ENSP00000316029,9606.ENSP00000337598,9606.ENSP00000338934,9606.ENSP00000339191,9606.ENSP00000341885,9606.ENSP00000346088,9606.ENSP00000346550,9606.ENSP00000353731,…	MAPK1,MYH9,PFN1,LAP3,CNN1,ACTN4,ADD1,IQGAP1,RPS11,FERMT3,GNB2,TLN1,LIMS1,EZR,CAV1,RPS2,RPL22,ANXA6,DPP4,NCKAP1,RPL12,EPB41L2,FLNA,CNN3,RPL5,PDLIM1,CAP1,RPS4X,ANXA1,DNM2,ACTN1,PPP1CB,RHOA,PDCD6IP,PPIA,FLNB,RPL30,ACTG1,RPS5,CLTC,EPPK1,LPP,CD59
GO:0030125	Clathrin vesicle coat	3	30	10	1.04	0.0445	9606.ENSP00000309415,9606.ENSP00000479606,9606.ENSP00000483185	CLTB,CLTC,AP2B1
GO:0005925	Focal adhesion	41	416	9.85577	1.03	8.66e-27	9606.ENSP00000215832,9606.ENSP00000216181,9606.ENSP00000225655,9606.ENSP00000226299,9606.ENSP00000252456,9606.ENSP00000252699,9606.ENSP00000264758,9606.ENSP00000268182,9606.ENSP00000270625,9606.ENSP00000305260,9606.ENSP00000316029,9606.ENSP00000337598,9606.ENSP00000338934,9606.ENSP00000339191,9606.ENSP00000341885,9606.ENSP00000346088,9606.ENSP00000346550,9606.ENSP00000353731,9606.ENSP00000354251,…	MAPK1,MYH9,PFN1,LAP3,CNN1,ACTN4,ADD1,IQGAP1,RPS11,GNB2,TLN1,LIMS1,EZR,CAV1,RPS2,RPL22,ANXA6,DPP4,NCKAP1,RPL12,EPB41L2,FLNA,CNN3,RPL5,PDLIM1,CAP1,RPS4X,ANXA1,DNM2,ACTN1,PPP1CB,RHOA,PDCD6IP,PPIA,FLNB,RPL30,ACTG1,RPS5,CLTC,LPP,CD59
GO:1904813	ficolin-1-rich granule lumen	12	124	9.67742	1.02	1.79e-07	9606.ENSP00000215832,9606.ENSP00000228740,9606.ENSP00000236671,9606.ENSP00000269848,9606.ENSP00000307940,9606.ENSP00000320171,9606.ENSP00000335153,9606.ENSP00000339063,9606.ENSP00000360124,9606.ENSP00000376886,9606.ENSP00000419425,9606.ENSP00000494175	MAPK1,LTA4H,CTSD,PFKL,EEF2,PKM,HSP90AA1,EEF1A1,PGM1,NME2,PPIA,HBB
GO:0002102	Podosome	3	31	9.67742	1.02	0.0472	9606.ENSP00000269886,9606.ENSP00000279227,9606.ENSP00000427687	SH3GL1,FERMT3,WDR1
GO:0072562	Blood microparticle	11	118	9.32203	1.01	9.69e-07	9606.ENSP00000225655,9606.ENSP00000245907,9606.ENSP00000262418,9606.ENSP00000264613,9606.ENSP00000273784,9606.ENSP00000295897,9606.ENSP00000348170,9606.ENSP00000356399,9606.ENSP00000364935,9606.ENSP00000458162,9606.ENSP00000494175	PFN1,C3,SLC4A1,CP,AHSG,ALB,HP,CFH,CLIC1,ACTG1,HBB
GO:0001772	Immunological synapse	4	43	9.30233	1.01	0.0133	9606.ENSP00000216181,9606.ENSP00000219150,9606.ENSP00000338934,9606.ENSP00000411825	MYH9,CORO1A,EZR,PDCD6IP
GO:1904724	Tertiary granule lumen	5	55	9.09091	1	0.0044	9606.ENSP00000228740,9606.ENSP00000236671,9606.ENSP00000348170,9606.ENSP00000360124,9606.ENSP00000494175	LTA4H,CTSD,HP,PGM1,HBB
GO:0005938	Cell cortex	27	304	8.88158	0.99	3.92e-16	9606.ENSP00000216181,9606.ENSP00000219150,9606.ENSP00000225655,9606.ENSP00000252699,9606.ENSP00000262418,9606.ENSP00000268182,9606.ENSP00000309415,9606.ENSP00000312634,9606.ENSP00000338934,9606.ENSP00000339063,9606.ENSP00000339191,9606.ENSP00000348965,9606.ENSP00000349259,9606.ENSP00000354947,9606.ENSP00000357110,9606.ENSP00000358866,9606.ENSP00000361883,9606.ENSP00000377941,9606.ENSP00000391249,…	MYH9,CORO1A,PFN1,ACTN4,SLC4A1,IQGAP1,CLTB,PDLIM2,EZR,EEF1A1,CAV1,DYNC1H1,SPTBN1,CAPZA2,EPB41L2,FLNA,CAP1,ACTN1,SEPTIN9,RHOA,FLNB,SEPTIN11,WDR1,ENO2,SEPTIN2,ENO1,SPTB
GO:0005905	Clathrin-coated pit	6	71	8.4507	0.97	0.0017	9606.ENSP00000309415,9606.ENSP00000340019,9606.ENSP00000373905,9606.ENSP00000449089,9606.ENSP00000479606,9606.ENSP00000483185	CLTB,HSPD1,DNM2,DNM1L,CLTC,AP2B1
GO:0005884	Actin filament	8	99	8.08081	0.95	0.00017	9606.ENSP00000219150,9606.ENSP00000268182,9606.ENSP00000312634,9606.ENSP00000338934,9606.ENSP00000354251,9606.ENSP00000360305,9606.ENSP00000458162,9606.ENSP00000498577	CORO1A,IQGAP1,PDLIM2,EZR,NCKAP1,PDLIM1,ACTG1,TPM3
GO:0031093	Platelet alpha granule lumen	5	66	7.57576	0.92	0.0082	9606.ENSP00000252699,9606.ENSP00000273784,9606.ENSP00000279227,9606.ENSP00000295897,9606.ENSP00000377941	ACTN4,AHSG,FERMT3,ALB,ACTN1
GO:0009898	Cytoplasmic side of plasma membrane	13	174	7.47126	0.91	6.39e-07	9606.ENSP00000216181,9606.ENSP00000262418,9606.ENSP00000265709,9606.ENSP00000268182,9606.ENSP00000305260,9606.ENSP00000312999,9606.ENSP00000338934,9606.ENSP00000357709,9606.ENSP00000367872,9606.ENSP00000377192,9606.ENSP00000400175,9606.ENSP00000483185,9606.ENSP00000495909	MYH9,SLC4A1,ANK1,IQGAP1,GNB2,GNAI2,EZR,S100A6,GNB1,G6PD,RHOA,AP2B1,SPTB
GO:0042470	Melanosome	8	109	7.33945	0.9	0.00031	9606.ENSP00000236671,9606.ENSP00000254722,9606.ENSP00000304592,9606.ENSP00000335153,9606.ENSP00000346550,9606.ENSP00000377958,9606.ENSP00000411825,9606.ENSP00000479606	CTSD,SERPINF1,FASN,HSP90AA1,ANXA6,CCT4,PDCD6IP,CLTC
GO:0101002	ficolin-1-rich granule	13	185	7.02703	0.89	1.17e-06	9606.ENSP00000215832,9606.ENSP00000228740,9606.ENSP00000236671,9606.ENSP00000269848,9606.ENSP00000307940,9606.ENSP00000320171,9606.ENSP00000335153,9606.ENSP00000339063,9606.ENSP00000360124,9606.ENSP00000376886,9606.ENSP00000400175,9606.ENSP00000419425,9606.ENSP00000494175	MAPK1,LTA4H,CTSD,PFKL,EEF2,PKM,HSP90AA1,EEF1A1,PGM1,NME2,RHOA,PPIA,HBB
GO:0032153	Cell division site	5	70	7.14286	0.89	0.0097	9606.ENSP00000216181,9606.ENSP00000391249,9606.ENSP00000400175,9606.ENSP00000422896,9606.ENSP00000479861	MYH9,SEPTIN9,RHOA,SEPTIN11,SEPTIN2
GO:0030660	Golgi-associated vesicle membrane	4	57	7.01754	0.89	0.0317	9606.ENSP00000309415,9606.ENSP00000357048,9606.ENSP00000405926,9606.ENSP00000479606	CLTB,COPA,TMED7,CLTC
GO:0034774	Secretory granule lumen	22	321	6.85358	0.88	5.34e-11	9606.ENSP00000205948,9606.ENSP00000215832,9606.ENSP00000225371,9606.ENSP00000236671,9606.ENSP00000245907,9606.ENSP00000252699,9606.ENSP00000269848,9606.ENSP00000273784,9606.ENSP00000279227,9606.ENSP00000295897,9606.ENSP00000302886,9606.ENSP00000307940,9606.ENSP00000320171,9606.ENSP00000335153,9606.ENSP00000339063,9606.ENSP00000348170,9606.ENSP00000348965,9606.ENSP00000361883,9606.ENSP00000375978,…	APOH,MAPK1,EPX,CTSD,C3,ACTN4,PFKL,AHSG,FERMT3,ALB,PA2G4,EEF2,PKM,HSP90AA1,EEF1A1,HP,DYNC1H1,CAP1,XRCC5,NME2,ACTN1,PPIA
GO:0012507	ER to Golgi transport vesicle membrane	4	58	6.89655	0.88	0.0333	9606.ENSP00000373312,9606.ENSP00000378721,9606.ENSP00000405926,9606.ENSP00000498879	SEC13,SEC31A,TMED7,CD59
GO:0098562	Cytoplasmic side of membrane	14	207	6.76329	0.87	5.89e-07	9606.ENSP00000216181,9606.ENSP00000262418,9606.ENSP00000265709,9606.ENSP00000268182,9606.ENSP00000305260,9606.ENSP00000312999,9606.ENSP00000338934,9606.ENSP00000339063,9606.ENSP00000357709,9606.ENSP00000367872,9606.ENSP00000377192,9606.ENSP00000400175,9606.ENSP00000483185,9606.ENSP00000495909	MYH9,SLC4A1,ANK1,IQGAP1,GNB2,GNAI2,EZR,EEF1A1,S100A6,GNB1,G6PD,RHOA,AP2B1,SPTB
GO:0031091	Platelet alpha granule	6	89	6.74157	0.87	0.0046	9606.ENSP00000252699,9606.ENSP00000273784,9606.ENSP00000279227,9606.ENSP00000295897,9606.ENSP00000356218,9606.ENSP00000377941	ACTN4,AHSG,FERMT3,ALB,CYB5R1,ACTN1
GO:0044391	Ribosomal subunit	12	187	6.41711	0.85	9.98e-06	9606.ENSP00000270625,9606.ENSP00000341885,9606.ENSP00000346015,9606.ENSP00000346088,9606.ENSP00000354739,9606.ENSP00000359345,9606.ENSP00000362744,9606.ENSP00000379506,9606.ENSP00000389351,9606.ENSP00000426909,9606.ENSP00000428085,9606.ENSP00000472985	RPS11,RPS2,RPL27A,RPL22,RPL12,RPL5,RPS4X,RPL14,RPSA,RACK1,RPL30,RPS5
GO:0015629	Actin cytoskeleton	30	482	6.22407	0.83	3.65e-14	9606.ENSP00000216181,9606.ENSP00000219150,9606.ENSP00000252699,9606.ENSP00000264758,9606.ENSP00000268182,9606.ENSP00000269886,9606.ENSP00000279227,9606.ENSP00000312634,9606.ENSP00000338934,9606.ENSP00000339063,9606.ENSP00000349259,9606.ENSP00000354251,9606.ENSP00000354947,9606.ENSP00000357110,9606.ENSP00000358866,9606.ENSP00000359225,9606.ENSP00000360305,9606.ENSP00000361883,9606.ENSP00000363500,…	MYH9,CORO1A,ACTN4,ADD1,IQGAP1,SH3GL1,FERMT3,PDLIM2,EZR,EEF1A1,SPTBN1,NCKAP1,CAPZA2,EPB41L2,FLNA,CNN3,PDLIM1,CAP1,CLIC4,ACTN1,SEPTIN9,PDCD6IP,FLNB,SEPTIN11,WDR1,ACTG1,SEPTIN2,LPP,SPTB,TPM3
GO:0001726	Ruffle	11	179	6.14525	0.83	4.43e-05	9606.ENSP00000216181,9606.ENSP00000268182,9606.ENSP00000316029,9606.ENSP00000338934,9606.ENSP00000339063,9606.ENSP00000354251,9606.ENSP00000357709,9606.ENSP00000373905,9606.ENSP00000376886,9606.ENSP00000377941,9606.ENSP00000400175	MYH9,IQGAP1,TLN1,EZR,EEF1A1,NCKAP1,S100A6,DNM2,NME2,ACTN1,RHOA
GO:0031234	Extrinsic component of cytoplasmic side of plasma membrane	6	102	5.88235	0.81	0.0082	9606.ENSP00000268182,9606.ENSP00000305260,9606.ENSP00000312999,9606.ENSP00000357709,9606.ENSP00000367872,9606.ENSP00000400175	IQGAP1,GNB2,GNAI2,S100A6,GNB1,RHOA
GO:0070062	Extracellular exosome	117	2096	5.58206	0.79	8.27e-64	9606.ENSP00000205948,9606.ENSP00000216181,9606.ENSP00000216802,9606.ENSP00000219150,9606.ENSP00000221419,9606.ENSP00000225371,9606.ENSP00000225655,9606.ENSP00000226299,9606.ENSP00000228318,9606.ENSP00000228740,9606.ENSP00000236671,9606.ENSP00000245206,9606.ENSP00000245907,9606.ENSP00000248437,9606.ENSP00000252603,9606.ENSP00000252699,9606.ENSP00000253496,9606.ENSP00000254722,9606.ENSP00000258091,…	APOH,MYH9,PSME2,CORO1A,HNRNPL,EPX,PFN1,LAP3,SLC25A3,LTA4H,CTSD,GOT2,C3,TUBA4A,PGLS,ACTN4,F12,SERPINF1,CCT7,ALDH2,SLC4A1,BLVRB,CP,IQGAP1,PFKL,RPS11,TINAGL1,AHSG,FERMT3,AKR1B1,PGLYRP2,RNPEP,CCT3,ALB,VPS35,DDB1,PA2G4,DCXR,LMAN2,FASN,GNB2,PCBP1,EEF2,GNAI2,TLN1,PKM,BGN,HSP90AA1,EZR,EEF1A1,HSPD1,PPL,RPS2,RPL22,ANXA6,HP,DYNC1H1,SPTBN1,DPP4,NCKAP1,GSTM3,COMT,RPL12,CAPZA2,CYB5R1,CFH,COPA,EPB41L2,S100A6,FL…
GO:0030134	COPII-coated ER to Golgi transport vesicle	5	90	5.55556	0.78	0.0256	9606.ENSP00000303366,9606.ENSP00000373312,9606.ENSP00000378721,9606.ENSP00000405926,9606.ENSP00000498879	LMAN2,SEC13,SEC31A,TMED7,CD59
GO:0035578	Azurophil granule lumen	5	91	5.49451	0.78	0.0267	9606.ENSP00000215832,9606.ENSP00000245907,9606.ENSP00000302886,9606.ENSP00000348965,9606.ENSP00000361883	MAPK1,C3,PA2G4,DYNC1H1,CAP1
GO:0030018	Z disc	7	131	5.34351	0.77	0.0052	9606.ENSP00000252699,9606.ENSP00000262418,9606.ENSP00000312634,9606.ENSP00000358866,9606.ENSP00000360305,9606.ENSP00000377941,9606.ENSP00000420213	ACTN4,SLC4A1,PDLIM2,FLNA,PDLIM1,ACTN1,FLNB
GO:0032587	Ruffle membrane	5	94	5.31915	0.77	0.0295	9606.ENSP00000316029,9606.ENSP00000338934,9606.ENSP00000339063,9606.ENSP00000373905,9606.ENSP00000400175	TLN1,EZR,EEF1A1,DNM2,RHOA
GO:0005912	Adherens junction	9	177	5.08475	0.75	0.0013	9606.ENSP00000216181,9606.ENSP00000264758,9606.ENSP00000312634,9606.ENSP00000316029,9606.ENSP00000338934,9606.ENSP00000355771,9606.ENSP00000359225,9606.ENSP00000360305,9606.ENSP00000366109	MYH9,ADD1,PDLIM2,TLN1,EZR,AFDN,CNN3,PDLIM1,ANXA1
GO:0030016	Myofibril	12	237	5.06329	0.74	9.34e-05	9606.ENSP00000252699,9606.ENSP00000262418,9606.ENSP00000265709,9606.ENSP00000312634,9606.ENSP00000349259,9606.ENSP00000358866,9606.ENSP00000360305,9606.ENSP00000377941,9606.ENSP00000420213,9606.ENSP00000458162,9606.ENSP00000495530,9606.ENSP00000498577	ACTN4,SLC4A1,ANK1,PDLIM2,SPTBN1,FLNA,PDLIM1,ACTN1,FLNB,ACTG1,ENO1,TPM3
GO:0030017	Sarcomere	11	217	5.06912	0.74	0.00022	9606.ENSP00000252699,9606.ENSP00000262418,9606.ENSP00000265709,9606.ENSP00000312634,9606.ENSP00000349259,9606.ENSP00000358866,9606.ENSP00000360305,9606.ENSP00000377941,9606.ENSP00000420213,9606.ENSP00000495530,9606.ENSP00000498577	ACTN4,SLC4A1,ANK1,PDLIM2,SPTBN1,FLNA,PDLIM1,ACTN1,FLNB,ENO1,TPM3
GO:0030496	Midbody	10	201	4.97512	0.74	0.00061	9606.ENSP00000226299,9606.ENSP00000268182,9606.ENSP00000312999,9606.ENSP00000363500,9606.ENSP00000373905,9606.ENSP00000394071,9606.ENSP00000400175,9606.ENSP00000411825,9606.ENSP00000426909,9606.ENSP00000479861	LAP3,IQGAP1,GNAI2,CLIC4,DNM2,GDI1,RHOA,PDCD6IP,RACK1,SEPTIN2
GO:0070820	Tertiary granule	8	164	4.87805	0.73	0.0039	9606.ENSP00000228740,9606.ENSP00000236671,9606.ENSP00000348170,9606.ENSP00000357288,9606.ENSP00000360124,9606.ENSP00000400175,9606.ENSP00000494175,9606.ENSP00000498879	LTA4H,CTSD,HP,LAMTOR2,PGM1,RHOA,HBB,CD59
GO:0005911	Cell-cell junction	23	499	4.60922	0.7	2.06e-08	9606.ENSP00000216181,9606.ENSP00000219150,9606.ENSP00000264758,9606.ENSP00000268182,9606.ENSP00000312634,9606.ENSP00000316029,9606.ENSP00000337598,9606.ENSP00000338934,9606.ENSP00000340510,9606.ENSP00000353731,9606.ENSP00000355771,9606.ENSP00000358866,9606.ENSP00000359225,9606.ENSP00000360305,9606.ENSP00000363500,9606.ENSP00000366109,9606.ENSP00000376345,9606.ENSP00000377941,9606.ENSP00000400175,…	MYH9,CORO1A,ADD1,IQGAP1,PDLIM2,TLN1,LIMS1,EZR,PPL,DPP4,AFDN,FLNA,CNN3,PDLIM1,CLIC4,ANXA1,GRB2,ACTN1,RHOA,PDCD6IP,WDR1,ACTG1,EPPK1
GO:0031256	Leading edge membrane	8	173	4.62428	0.7	0.005	9606.ENSP00000316029,9606.ENSP00000338934,9606.ENSP00000339063,9606.ENSP00000349259,9606.ENSP00000353731,9606.ENSP00000354251,9606.ENSP00000373905,9606.ENSP00000400175	TLN1,EZR,EEF1A1,SPTBN1,DPP4,NCKAP1,DNM2,RHOA
GO:0005775	Vacuolar lumen	8	175	4.57143	0.7	0.0052	9606.ENSP00000215832,9606.ENSP00000236671,9606.ENSP00000245907,9606.ENSP00000302886,9606.ENSP00000327336,9606.ENSP00000335153,9606.ENSP00000348965,9606.ENSP00000361883	MAPK1,CTSD,C3,PA2G4,BGN,HSP90AA1,DYNC1H1,CAP1
GO:0019897	Extrinsic component of plasma membrane	8	176	4.54545	0.7	0.0054	9606.ENSP00000268182,9606.ENSP00000305260,9606.ENSP00000312999,9606.ENSP00000346300,9606.ENSP00000357709,9606.ENSP00000366109,9606.ENSP00000367872,9606.ENSP00000400175	IQGAP1,GNB2,GNAI2,CRKL,S100A6,ANXA1,GNB1,RHOA
GO:0030662	Coated vesicle membrane	8	193	4.14508	0.66	0.0085	9606.ENSP00000309415,9606.ENSP00000357048,9606.ENSP00000373312,9606.ENSP00000378721,9606.ENSP00000405926,9606.ENSP00000479606,9606.ENSP00000483185,9606.ENSP00000498879	CLTB,COPA,SEC13,SEC31A,TMED7,CLTC,AP2B1,CD59
GO:0070161	Anchoring junction	53	1325	4	0.64	5.84e-18	9606.ENSP00000215832,9606.ENSP00000216181,9606.ENSP00000219150,9606.ENSP00000225655,9606.ENSP00000226299,9606.ENSP00000252456,9606.ENSP00000252699,9606.ENSP00000264758,9606.ENSP00000268182,9606.ENSP00000269886,9606.ENSP00000270625,9606.ENSP00000279227,9606.ENSP00000305260,9606.ENSP00000312634,9606.ENSP00000316029,9606.ENSP00000337598,9606.ENSP00000338934,9606.ENSP00000339191,9606.ENSP00000340510,…	MAPK1,MYH9,CORO1A,PFN1,LAP3,CNN1,ACTN4,ADD1,IQGAP1,SH3GL1,RPS11,FERMT3,GNB2,PDLIM2,TLN1,LIMS1,EZR,CAV1,PPL,RPS2,RPL22,ANXA6,DPP4,NCKAP1,RPL12,AFDN,EPB41L2,FLNA,CNN3,RPL5,PDLIM1,CAP1,RPS4X,CLIC4,ANXA1,DNM2,GRB2,ACTN1,PPP1CB,RHOA,PDCD6IP,PPIA,FLNB,SEPTIN11,WDR1,RPL30,DNM1L,ACTG1,RPS5,CLTC,EPPK1,LPP,CD59
GO:0030141	Secretory granule	35	873	4.00916	0.64	2.36e-11	9606.ENSP00000205948,9606.ENSP00000215832,9606.ENSP00000216181,9606.ENSP00000225371,9606.ENSP00000228740,9606.ENSP00000236671,9606.ENSP00000245907,9606.ENSP00000252699,9606.ENSP00000268182,9606.ENSP00000269848,9606.ENSP00000273784,9606.ENSP00000279227,9606.ENSP00000295897,9606.ENSP00000302886,9606.ENSP00000307940,9606.ENSP00000320171,9606.ENSP00000335153,9606.ENSP00000339063,9606.ENSP00000339191,…	APOH,MAPK1,MYH9,EPX,LTA4H,CTSD,C3,ACTN4,IQGAP1,PFKL,AHSG,FERMT3,ALB,PA2G4,EEF2,PKM,HSP90AA1,EEF1A1,CAV1,HSPD1,HP,DYNC1H1,CYB5R1,LAMTOR2,PGM1,VDAC2,CAP1,XRCC5,NME2,ACTN1,RHOA,PPIA,HBB,STING1,CD59
GO:1990904	Ribonucleoprotein complex	26	687	3.78457	0.62	7e-08	9606.ENSP00000221419,9606.ENSP00000248342,9606.ENSP00000252699,9606.ENSP00000268182,9606.ENSP00000270625,9606.ENSP00000305230,9606.ENSP00000307940,9606.ENSP00000311747,9606.ENSP00000335321,9606.ENSP00000341885,9606.ENSP00000346015,9606.ENSP00000346088,9606.ENSP00000354739,9606.ENSP00000359345,9606.ENSP00000362744,9606.ENSP00000375978,9606.ENSP00000376309,9606.ENSP00000379506,9606.ENSP00000380070,…	HNRNPL,EIF3K,ACTN4,IQGAP1,RPS11,SRP9,EEF2,RBM14,SF3B1,RPS2,RPL27A,RPL22,RPL12,RPL5,RPS4X,XRCC5,HNRNPA3,RPL14,GAPDH,RPSA,SNRPG,HNRNPF,DDX39B,RACK1,RPL30,RPS5
GO:0005615	Extracellular space	120	3247	3.69572	0.61	1.37e-47	9606.ENSP00000205948,9606.ENSP00000216181,9606.ENSP00000216802,9606.ENSP00000219150,9606.ENSP00000221419,9606.ENSP00000225371,9606.ENSP00000225655,9606.ENSP00000225698,9606.ENSP00000226299,9606.ENSP00000228318,9606.ENSP00000228740,9606.ENSP00000236671,9606.ENSP00000245206,9606.ENSP00000245907,9606.ENSP00000248437,9606.ENSP00000252603,9606.ENSP00000252699,9606.ENSP00000253496,9606.ENSP00000254722,…	APOH,MYH9,PSME2,CORO1A,HNRNPL,EPX,PFN1,C1QBP,LAP3,SLC25A3,LTA4H,CTSD,GOT2,C3,TUBA4A,PGLS,ACTN4,F12,SERPINF1,CCT7,ALDH2,SLC4A1,BLVRB,CP,IQGAP1,PFKL,RPS11,TINAGL1,AHSG,FERMT3,AKR1B1,PGLYRP2,RNPEP,CCT3,ALB,VPS35,DDB1,PA2G4,DCXR,LMAN2,FASN,GNB2,PCBP1,EEF2,GNAI2,TLN1,PKM,BGN,HSP90AA1,EZR,EEF1A1,HSPD1,PPL,RPS2,RPL22,ANXA6,HP,DYNC1H1,SPTBN1,DPP4,NCKAP1,GSTM3,COMT,RPL12,CAPZA2,CYB5R1,CFH,COPA,EPB41L2,S10…
GO:0099503	Secretory vesicle	38	1047	3.62942	0.6	3.53e-11	9606.ENSP00000205948,9606.ENSP00000215832,9606.ENSP00000216181,9606.ENSP00000225371,9606.ENSP00000228740,9606.ENSP00000236671,9606.ENSP00000245907,9606.ENSP00000252699,9606.ENSP00000268182,9606.ENSP00000269848,9606.ENSP00000273784,9606.ENSP00000279227,9606.ENSP00000295897,9606.ENSP00000302886,9606.ENSP00000307940,9606.ENSP00000309415,9606.ENSP00000320171,9606.ENSP00000335153,9606.ENSP00000339063,…	APOH,MAPK1,MYH9,EPX,LTA4H,CTSD,C3,ACTN4,IQGAP1,PFKL,AHSG,FERMT3,ALB,PA2G4,EEF2,CLTB,PKM,HSP90AA1,EEF1A1,CAV1,HSPD1,HP,DYNC1H1,CYB5R1,LAMTOR2,PGM1,VDAC2,CAP1,XRCC5,NME2,ACTN1,RHOA,PPIA,DNM1L,SEPTIN2,HBB,STING1,CD59
GO:0030139	Endocytic vesicle	12	338	3.5503	0.59	0.0021	9606.ENSP00000219150,9606.ENSP00000309415,9606.ENSP00000335153,9606.ENSP00000339191,9606.ENSP00000348170,9606.ENSP00000353731,9606.ENSP00000373905,9606.ENSP00000420213,9606.ENSP00000458162,9606.ENSP00000479606,9606.ENSP00000483185,9606.ENSP00000494175	CORO1A,CLTB,HSP90AA1,CAV1,HP,DPP4,DNM2,FLNB,ACTG1,CLTC,AP2B1,HBB
GO:0030135	Coated vesicle	11	307	3.58306	0.59	0.0035	9606.ENSP00000303366,9606.ENSP00000309415,9606.ENSP00000340019,9606.ENSP00000357048,9606.ENSP00000373312,9606.ENSP00000373905,9606.ENSP00000378721,9606.ENSP00000405926,9606.ENSP00000479606,9606.ENSP00000483185,9606.ENSP00000498879	LMAN2,CLTB,HSPD1,COPA,SEC13,DNM2,SEC31A,TMED7,CLTC,AP2B1,CD59
GO:0031253	Cell projection membrane	12	342	3.50877	0.58	0.0023	9606.ENSP00000309415,9606.ENSP00000316029,9606.ENSP00000335153,9606.ENSP00000338934,9606.ENSP00000339063,9606.ENSP00000349259,9606.ENSP00000353731,9606.ENSP00000354251,9606.ENSP00000357051,9606.ENSP00000373905,9606.ENSP00000400175,9606.ENSP00000479861	CLTB,TLN1,HSP90AA1,EZR,EEF1A1,SPTBN1,DPP4,NCKAP1,PEX19,DNM2,RHOA,SEPTIN2
GO:0045121	Membrane raft	11	320	3.4375	0.58	0.0046	9606.ENSP00000215832,9606.ENSP00000236671,9606.ENSP00000312999,9606.ENSP00000338934,9606.ENSP00000339191,9606.ENSP00000353731,9606.ENSP00000357288,9606.ENSP00000361635,9606.ENSP00000362413,9606.ENSP00000418447,9606.ENSP00000437402	MAPK1,CTSD,GNAI2,EZR,CAV1,DPP4,LAMTOR2,VDAC2,PGK1,PPP2CA,ENO2
GO:0031982	Vesicle	131	3957	3.31059	0.56	5.9e-49	9606.ENSP00000205948,9606.ENSP00000215832,9606.ENSP00000216181,9606.ENSP00000216802,9606.ENSP00000219150,9606.ENSP00000221419,9606.ENSP00000225371,9606.ENSP00000225655,9606.ENSP00000226299,9606.ENSP00000228318,9606.ENSP00000228740,9606.ENSP00000236671,9606.ENSP00000245206,9606.ENSP00000245907,9606.ENSP00000248437,9606.ENSP00000252603,9606.ENSP00000252699,9606.ENSP00000253496,9606.ENSP00000254722,…	APOH,MAPK1,MYH9,PSME2,CORO1A,HNRNPL,EPX,PFN1,LAP3,SLC25A3,LTA4H,CTSD,GOT2,C3,TUBA4A,PGLS,ACTN4,F12,SERPINF1,CCT7,ALDH2,SLC4A1,BLVRB,CP,IQGAP1,PFKL,SH3GL1,RPS11,TINAGL1,AHSG,FERMT3,AKR1B1,PGLYRP2,RNPEP,CCT3,ALB,PRDX3,VPS35,DDB1,PA2G4,DCXR,LMAN2,FASN,GNB2,PCBP1,EEF2,CLTB,GNAI2,TLN1,PKM,BGN,HSP90AA1,EZR,EEF1A1,CAV1,HSPD1,PPL,RPS2,RPL22,ANXA6,HP,DYNC1H1,SPTBN1,DPP4,NCKAP1,GSTM3,COMT,RPL12,CAPZA2,CYB5…
GO:0031252	Cell leading edge	14	422	3.31754	0.56	0.0011	9606.ENSP00000216181,9606.ENSP00000219150,9606.ENSP00000268182,9606.ENSP00000316029,9606.ENSP00000338934,9606.ENSP00000339063,9606.ENSP00000349259,9606.ENSP00000353731,9606.ENSP00000354251,9606.ENSP00000357709,9606.ENSP00000373905,9606.ENSP00000376886,9606.ENSP00000377941,9606.ENSP00000400175	MYH9,CORO1A,IQGAP1,TLN1,EZR,EEF1A1,SPTBN1,DPP4,NCKAP1,S100A6,DNM2,NME2,ACTN1,RHOA
GO:0098978	Glutamatergic synapse	11	334	3.29341	0.56	0.0061	9606.ENSP00000219150,9606.ENSP00000225655,9606.ENSP00000225698,9606.ENSP00000269886,9606.ENSP00000299138,9606.ENSP00000346088,9606.ENSP00000349259,9606.ENSP00000373905,9606.ENSP00000377941,9606.ENSP00000400175,9606.ENSP00000483185	CORO1A,PFN1,C1QBP,SH3GL1,VPS35,RPL22,SPTBN1,DNM2,ACTN1,RHOA,AP2B1
GO:0030054	Cell junction	67	2115	3.16785	0.54	2.78e-18	9606.ENSP00000215832,9606.ENSP00000216181,9606.ENSP00000219150,9606.ENSP00000225655,9606.ENSP00000225698,9606.ENSP00000226299,9606.ENSP00000252456,9606.ENSP00000252699,9606.ENSP00000264758,9606.ENSP00000268182,9606.ENSP00000269886,9606.ENSP00000270625,9606.ENSP00000279227,9606.ENSP00000299138,9606.ENSP00000305260,9606.ENSP00000307940,9606.ENSP00000309415,9606.ENSP00000312634,9606.ENSP00000312999,…	MAPK1,MYH9,CORO1A,PFN1,C1QBP,LAP3,CNN1,ACTN4,ADD1,IQGAP1,SH3GL1,RPS11,FERMT3,VPS35,GNB2,EEF2,CLTB,PDLIM2,GNAI2,TLN1,LIMS1,EZR,CAV1,PPL,RPS2,RPL22,CRKL,ANXA6,SPTBN1,DPP4,NCKAP1,RPL12,AFDN,EPB41L2,FLNA,CNN3,RPL5,PDLIM1,CAP1,RPS4X,CLIC4,ANXA1,GNB1,DNM2,GRB2,ACTN1,PPP1CB,RPL14,RHOA,PDCD6IP,PPP2CA,PPIA,FLNB,SEPTIN11,WDR1,RPL30,ENO2,DNM1L,ACTG1,RPS5,CLTC,SEPTIN2,AP2B1,EPPK1,LPP,SPTB,CD59
GO:0062023	Collagen-containing extracellular matrix	13	407	3.1941	0.54	0.0028	9606.ENSP00000205948,9606.ENSP00000236671,9606.ENSP00000253496,9606.ENSP00000254722,9606.ENSP00000271064,9606.ENSP00000273784,9606.ENSP00000320171,9606.ENSP00000327336,9606.ENSP00000335153,9606.ENSP00000346550,9606.ENSP00000357709,9606.ENSP00000366109,9606.ENSP00000378058	APOH,CTSD,F12,SERPINF1,TINAGL1,AHSG,PKM,BGN,HSP90AA1,ANXA6,S100A6,ANXA1,EFEMP1
GO:0009925	Basal plasma membrane	8	251	3.18725	0.54	0.0349	9606.ENSP00000262418,9606.ENSP00000265709,9606.ENSP00000335153,9606.ENSP00000338934,9606.ENSP00000339191,9606.ENSP00000360269,9606.ENSP00000366109,9606.ENSP00000484472	SLC4A1,ANK1,HSP90AA1,EZR,CAV1,TACSTD2,ANXA1,EPPK1
GO:0099512	Supramolecular fiber	30	1000	3	0.52	5.49e-07	9606.ENSP00000216181,9606.ENSP00000219150,9606.ENSP00000248437,9606.ENSP00000252699,9606.ENSP00000258091,9606.ENSP00000262418,9606.ENSP00000265709,9606.ENSP00000268182,9606.ENSP00000295688,9606.ENSP00000303356,9606.ENSP00000312634,9606.ENSP00000338934,9606.ENSP00000348965,9606.ENSP00000349259,9606.ENSP00000354251,9606.ENSP00000358866,9606.ENSP00000360305,9606.ENSP00000373905,9606.ENSP00000377941,…	MYH9,CORO1A,TUBA4A,ACTN4,CCT7,SLC4A1,ANK1,IQGAP1,CCT3,DCXR,PDLIM2,EZR,DYNC1H1,SPTBN1,NCKAP1,FLNA,PDLIM1,DNM2,ACTN1,CCT4,SEPTIN9,FLNB,TUBA1C,DNM1L,ACTG1,TPT1,CLTC,EPPK1,ENO1,TPM3
GO:0005576	Extracellular region	122	4175	2.92216	0.5	5.28e-38	9606.ENSP00000205948,9606.ENSP00000215832,9606.ENSP00000216181,9606.ENSP00000216802,9606.ENSP00000219150,9606.ENSP00000221419,9606.ENSP00000225371,9606.ENSP00000225655,9606.ENSP00000225698,9606.ENSP00000226299,9606.ENSP00000228318,9606.ENSP00000228740,9606.ENSP00000236671,9606.ENSP00000245206,9606.ENSP00000245907,9606.ENSP00000248437,9606.ENSP00000252603,9606.ENSP00000252699,9606.ENSP00000253496,…	APOH,MAPK1,MYH9,PSME2,CORO1A,HNRNPL,EPX,PFN1,C1QBP,LAP3,SLC25A3,LTA4H,CTSD,GOT2,C3,TUBA4A,PGLS,ACTN4,F12,SERPINF1,CCT7,ALDH2,SLC4A1,BLVRB,CP,IQGAP1,PFKL,RPS11,TINAGL1,AHSG,FERMT3,AKR1B1,PGLYRP2,RNPEP,CCT3,ALB,VPS35,DDB1,PA2G4,DCXR,LMAN2,FASN,GNB2,PCBP1,EEF2,GNAI2,TLN1,PKM,BGN,HSP90AA1,EZR,EEF1A1,HSPD1,PPL,RPS2,RPL22,ANXA6,HP,DYNC1H1,SPTBN1,DPP4,NCKAP1,GSTM3,COMT,RPL12,CAPZA2,CYB5R1,CFH,COPA,EPB41…
GO:0048471	Perinuclear region of cytoplasm	21	727	2.88858	0.5	0.00013	9606.ENSP00000221419,9606.ENSP00000252699,9606.ENSP00000254722,9606.ENSP00000299138,9606.ENSP00000305260,9606.ENSP00000335153,9606.ENSP00000337598,9606.ENSP00000338934,9606.ENSP00000339191,9606.ENSP00000346550,9606.ENSP00000357709,9606.ENSP00000363500,9606.ENSP00000364935,9606.ENSP00000373905,9606.ENSP00000376886,9606.ENSP00000378721,9606.ENSP00000380070,9606.ENSP00000391249,9606.ENSP00000426909,…	HNRNPL,ACTN4,SERPINF1,VPS35,GNB2,HSP90AA1,LIMS1,EZR,CAV1,ANXA6,S100A6,CLIC4,CLIC1,DNM2,NME2,SEC31A,GAPDH,SEPTIN9,RACK1,DNM1L,STING1
GO:0005874	Microtubule	13	453	2.86976	0.5	0.0063	9606.ENSP00000248437,9606.ENSP00000258091,9606.ENSP00000268182,9606.ENSP00000295688,9606.ENSP00000303356,9606.ENSP00000348965,9606.ENSP00000373905,9606.ENSP00000377958,9606.ENSP00000391249,9606.ENSP00000443475,9606.ENSP00000449089,9606.ENSP00000477781,9606.ENSP00000479606	TUBA4A,CCT7,IQGAP1,CCT3,DCXR,DYNC1H1,DNM2,CCT4,SEPTIN9,TUBA1C,DNM1L,TPT1,CLTC
GO:0005765	Lysosomal membrane	12	417	2.8777	0.5	0.0092	9606.ENSP00000236671,9606.ENSP00000264613,9606.ENSP00000299138,9606.ENSP00000305260,9606.ENSP00000339063,9606.ENSP00000346550,9606.ENSP00000353731,9606.ENSP00000357288,9606.ENSP00000367872,9606.ENSP00000373312,9606.ENSP00000479606,9606.ENSP00000483185	CTSD,CP,VPS35,GNB2,EEF1A1,ANXA6,DPP4,LAMTOR2,GNB1,SEC13,CLTC,AP2B1
GO:0005764	Lysosome	21	746	2.81501	0.49	0.00019	9606.ENSP00000215832,9606.ENSP00000236671,9606.ENSP00000245907,9606.ENSP00000264613,9606.ENSP00000271064,9606.ENSP00000299138,9606.ENSP00000302886,9606.ENSP00000305260,9606.ENSP00000327336,9606.ENSP00000335153,9606.ENSP00000339063,9606.ENSP00000346550,9606.ENSP00000348965,9606.ENSP00000353731,9606.ENSP00000357288,9606.ENSP00000359664,9606.ENSP00000361883,9606.ENSP00000367872,9606.ENSP00000373312,…	MAPK1,CTSD,C3,CP,TINAGL1,VPS35,PA2G4,GNB2,BGN,HSP90AA1,EEF1A1,ANXA6,DYNC1H1,DPP4,LAMTOR2,CTBS,CAP1,GNB1,SEC13,CLTC,AP2B1
GO:0005774	Vacuolar membrane	13	459	2.83224	0.49	0.007	9606.ENSP00000236671,9606.ENSP00000264613,9606.ENSP00000299138,9606.ENSP00000305260,9606.ENSP00000339063,9606.ENSP00000346550,9606.ENSP00000353731,9606.ENSP00000357288,9606.ENSP00000367872,9606.ENSP00000373312,9606.ENSP00000479606,9606.ENSP00000483185,9606.ENSP00000498596	CTSD,CP,VPS35,GNB2,EEF1A1,ANXA6,DPP4,LAMTOR2,GNB1,SEC13,CLTC,AP2B1,STING1
GO:0099513	Polymeric cytoskeletal fiber	21	757	2.77411	0.48	0.00023	9606.ENSP00000219150,9606.ENSP00000248437,9606.ENSP00000258091,9606.ENSP00000268182,9606.ENSP00000295688,9606.ENSP00000303356,9606.ENSP00000312634,9606.ENSP00000338934,9606.ENSP00000348965,9606.ENSP00000354251,9606.ENSP00000360305,9606.ENSP00000373905,9606.ENSP00000377958,9606.ENSP00000391249,9606.ENSP00000443475,9606.ENSP00000449089,9606.ENSP00000458162,9606.ENSP00000477781,9606.ENSP00000479606,…	CORO1A,TUBA4A,CCT7,IQGAP1,CCT3,DCXR,PDLIM2,EZR,DYNC1H1,NCKAP1,PDLIM1,DNM2,CCT4,SEPTIN9,TUBA1C,DNM1L,ACTG1,TPT1,CLTC,EPPK1,TPM3
GO:0019898	Extrinsic component of membrane	9	323	2.78638	0.48	0.0454	9606.ENSP00000268182,9606.ENSP00000305260,9606.ENSP00000312999,9606.ENSP00000338934,9606.ENSP00000346300,9606.ENSP00000357709,9606.ENSP00000366109,9606.ENSP00000367872,9606.ENSP00000400175	IQGAP1,GNB2,GNAI2,EZR,CRKL,S100A6,ANXA1,GNB1,RHOA
GO:0031410	Cytoplasmic vesicle	65	2482	2.61886	0.46	1.03e-13	9606.ENSP00000205948,9606.ENSP00000215832,9606.ENSP00000216181,9606.ENSP00000219150,9606.ENSP00000225371,9606.ENSP00000228740,9606.ENSP00000236671,9606.ENSP00000245907,9606.ENSP00000252699,9606.ENSP00000254722,9606.ENSP00000268182,9606.ENSP00000269848,9606.ENSP00000269886,9606.ENSP00000273784,9606.ENSP00000279227,9606.ENSP00000295897,9606.ENSP00000298510,9606.ENSP00000299138,9606.ENSP00000302886,…	APOH,MAPK1,MYH9,CORO1A,EPX,LTA4H,CTSD,C3,ACTN4,SERPINF1,IQGAP1,PFKL,SH3GL1,AHSG,FERMT3,ALB,PRDX3,VPS35,PA2G4,LMAN2,FASN,EEF2,CLTB,PKM,BGN,HSP90AA1,EZR,EEF1A1,CAV1,HSPD1,ANXA6,HP,DYNC1H1,DPP4,CYB5R1,COPA,LAMTOR2,PGM1,VDAC2,CAP1,CLIC4,ANXA1,ESD,SEC13,DNM2,XRCC5,GRB2,NME2,ACTN1,CCT4,SEC31A,RHOA,TMED7,PDCD6IP,PPIA,FLNB,DNM1L,ACTG1,TPT1,CLTC,SEPTIN2,AP2B1,HBB,STING1,CD59
GO:0099080	Supramolecular complex	36	1366	2.63543	0.46	4.32e-07	9606.ENSP00000216181,9606.ENSP00000219150,9606.ENSP00000221419,9606.ENSP00000248437,9606.ENSP00000252699,9606.ENSP00000258091,9606.ENSP00000262418,9606.ENSP00000263579,9606.ENSP00000265709,9606.ENSP00000268182,9606.ENSP00000295688,9606.ENSP00000303356,9606.ENSP00000305556,9606.ENSP00000312634,9606.ENSP00000338934,9606.ENSP00000348965,9606.ENSP00000349259,9606.ENSP00000354251,9606.ENSP00000358866,…	MYH9,CORO1A,HNRNPL,TUBA4A,ACTN4,CCT7,SLC4A1,DCPS,ANK1,IQGAP1,CCT3,DCXR,PCBP1,PDLIM2,EZR,DYNC1H1,SPTBN1,NCKAP1,FLNA,PDLIM1,RPS4X,DNM2,ACTN1,CCT4,SEPTIN9,SNRPG,FLNB,TUBA1C,DNM1L,ACTG1,TPT1,CLTC,SEPTIN2,EPPK1,ENO1,TPM3
GO:0005773	Vacuole	22	839	2.62217	0.46	0.00031	9606.ENSP00000215832,9606.ENSP00000236671,9606.ENSP00000245907,9606.ENSP00000264613,9606.ENSP00000271064,9606.ENSP00000299138,9606.ENSP00000302886,9606.ENSP00000305260,9606.ENSP00000327336,9606.ENSP00000335153,9606.ENSP00000339063,9606.ENSP00000346550,9606.ENSP00000348965,9606.ENSP00000353731,9606.ENSP00000357288,9606.ENSP00000359664,9606.ENSP00000361883,9606.ENSP00000367872,9606.ENSP00000373312,…	MAPK1,CTSD,C3,CP,TINAGL1,VPS35,PA2G4,GNB2,BGN,HSP90AA1,EEF1A1,ANXA6,DYNC1H1,DPP4,LAMTOR2,CTBS,CAP1,GNB1,SEC13,CLTC,AP2B1,STING1
GO:0098552	Side of membrane	16	611	2.61866	0.46	0.0041	9606.ENSP00000216181,9606.ENSP00000262418,9606.ENSP00000265709,9606.ENSP00000268182,9606.ENSP00000305260,9606.ENSP00000312999,9606.ENSP00000338934,9606.ENSP00000339063,9606.ENSP00000357709,9606.ENSP00000366109,9606.ENSP00000367872,9606.ENSP00000377192,9606.ENSP00000400175,9606.ENSP00000483185,9606.ENSP00000495909,9606.ENSP00000498879	MYH9,SLC4A1,ANK1,IQGAP1,GNB2,GNAI2,EZR,EEF1A1,S100A6,ANXA1,GNB1,G6PD,RHOA,AP2B1,SPTB,CD59
GO:0030424	Axon	16	651	2.45776	0.43	0.007	9606.ENSP00000219150,9606.ENSP00000254722,9606.ENSP00000268182,9606.ENSP00000335153,9606.ENSP00000348965,9606.ENSP00000349259,9606.ENSP00000354511,9606.ENSP00000357048,9606.ENSP00000358866,9606.ENSP00000373905,9606.ENSP00000394071,9606.ENSP00000400175,9606.ENSP00000422896,9606.ENSP00000427985,9606.ENSP00000437402,9606.ENSP00000458162	CORO1A,SERPINF1,IQGAP1,HSP90AA1,DYNC1H1,SPTBN1,COMT,COPA,FLNA,DNM2,GDI1,RHOA,SEPTIN11,DPYSL2,ENO2,ACTG1
GO:0005856	Cytoskeleton	57	2369	2.40608	0.42	2.9e-10	9606.ENSP00000215832,9606.ENSP00000216181,9606.ENSP00000219150,9606.ENSP00000225655,9606.ENSP00000248437,9606.ENSP00000252456,9606.ENSP00000252699,9606.ENSP00000253363,9606.ENSP00000258091,9606.ENSP00000262418,9606.ENSP00000264758,9606.ENSP00000265709,9606.ENSP00000268182,9606.ENSP00000269886,9606.ENSP00000279227,9606.ENSP00000295688,9606.ENSP00000303356,9606.ENSP00000312634,9606.ENSP00000312999,…	MAPK1,MYH9,CORO1A,PFN1,TUBA4A,CNN1,ACTN4,RBM39,CCT7,SLC4A1,ADD1,ANK1,IQGAP1,SH3GL1,FERMT3,CCT3,DCXR,PDLIM2,GNAI2,TLN1,EZR,EEF1A1,PPL,DYNC1H1,SPTBN1,NCKAP1,CAPZA2,EPB41L2,FLNA,CNN3,PDLIM1,CAP1,CLIC4,DNM2,TAGLN,G6PD,ACTN1,CCT4,GAPDH,SEPTIN9,RHOA,PDCD6IP,PPP2CA,FLNB,SEPTIN11,WDR1,DPYSL2,TUBA1C,DNM1L,ACTG1,TPT1,CLTC,SEPTIN2,EPPK1,LPP,SPTB,TPM3
GO:0098794	Postsynapse	14	621	2.25443	0.39	0.0285	9606.ENSP00000264758,9606.ENSP00000299138,9606.ENSP00000309415,9606.ENSP00000346300,9606.ENSP00000349259,9606.ENSP00000354739,9606.ENSP00000373905,9606.ENSP00000377941,9606.ENSP00000379506,9606.ENSP00000400175,9606.ENSP00000422896,9606.ENSP00000428085,9606.ENSP00000458162,9606.ENSP00000483185	ADD1,VPS35,CLTB,CRKL,SPTBN1,RPL12,DNM2,ACTN1,RPL14,RHOA,SEPTIN11,RPL30,ACTG1,AP2B1
GO:0005829	Cytosol	116	5438	2.13314	0.37	2.88e-22	9606.ENSP00000215832,9606.ENSP00000216181,9606.ENSP00000216802,9606.ENSP00000219150,9606.ENSP00000221419,9606.ENSP00000221566,9606.ENSP00000225655,9606.ENSP00000225698,9606.ENSP00000226299,9606.ENSP00000228740,9606.ENSP00000248342,9606.ENSP00000248437,9606.ENSP00000252603,9606.ENSP00000252699,9606.ENSP00000258091,9606.ENSP00000263368,9606.ENSP00000263579,9606.ENSP00000264758,9606.ENSP00000265709,…	MAPK1,MYH9,PSME2,CORO1A,HNRNPL,SGTA,PFN1,C1QBP,LAP3,LTA4H,EIF3K,TUBA4A,PGLS,ACTN4,CCT7,BLVRB,DCPS,ADD1,ANK1,IQGAP1,PFKL,SH3GL1,RPS11,AKR1B1,CCT3,METAP1,PRDX3,VPS35,FASN,SRP9,GNB2,PCBP1,ADH1B,EEF2,CLTB,GNAI2,TLN1,PKM,HSP90AA1,LIMS1,EZR,EEF1A1,HSPD1,PPL,RPS2,RPL27A,RPL22,CRKL,DYNC1H1,SPTBN1,NCKAP1,GSTM3,COMT,RPL12,CAPZA2,AFDN,COPA,PEX19,EPB41L2,S100A6,FLNA,CNN3,RPL5,PGM1,TACSTD2,PGK1,GLO1,RPS4X,CLI…
GO:0042995	Cell projection	51	2379	2.14376	0.37	1.97e-07	9606.ENSP00000215832,9606.ENSP00000216181,9606.ENSP00000219150,9606.ENSP00000252699,9606.ENSP00000254722,9606.ENSP00000265709,9606.ENSP00000268182,9606.ENSP00000269886,9606.ENSP00000279227,9606.ENSP00000299138,9606.ENSP00000303356,9606.ENSP00000309415,9606.ENSP00000312999,9606.ENSP00000316029,9606.ENSP00000320171,9606.ENSP00000335153,9606.ENSP00000338934,9606.ENSP00000339063,9606.ENSP00000339191,…	MAPK1,MYH9,CORO1A,ACTN4,SERPINF1,ANK1,IQGAP1,SH3GL1,FERMT3,VPS35,DCXR,CLTB,GNAI2,TLN1,PKM,HSP90AA1,EZR,EEF1A1,CAV1,HSPD1,DYNC1H1,SPTBN1,DPP4,NCKAP1,GSTM3,COMT,COPA,PEX19,S100A6,FLNA,VDAC2,CLIC4,ANXA1,GNB1,DNM2,NME2,ACTN1,CCT4,ERO1A,SEPTIN9,GDI1,RHOA,SEPTIN11,RACK1,WDR1,DPYSL2,ENO2,ACTG1,SEPTIN2,EPPK1,SPTB
GO:0045202	Synapse	29	1350	2.14815	0.37	0.00048	9606.ENSP00000215832,9606.ENSP00000216181,9606.ENSP00000219150,9606.ENSP00000225655,9606.ENSP00000225698,9606.ENSP00000264758,9606.ENSP00000269886,9606.ENSP00000299138,9606.ENSP00000307940,9606.ENSP00000309415,9606.ENSP00000312999,9606.ENSP00000346088,9606.ENSP00000346300,9606.ENSP00000349259,9606.ENSP00000354739,9606.ENSP00000359345,9606.ENSP00000367872,9606.ENSP00000373905,9606.ENSP00000377941,…	MAPK1,MYH9,CORO1A,PFN1,C1QBP,ADD1,SH3GL1,VPS35,EEF2,CLTB,GNAI2,RPL22,CRKL,SPTBN1,RPL12,RPL5,GNB1,DNM2,ACTN1,RPL14,RHOA,PPP2CA,SEPTIN11,RPL30,ENO2,DNM1L,ACTG1,SEPTIN2,AP2B1
GO:0098590	Plasma membrane region	26	1237	2.10186	0.36	0.0018	9606.ENSP00000215832,9606.ENSP00000216181,9606.ENSP00000262418,9606.ENSP00000265709,9606.ENSP00000309415,9606.ENSP00000316029,9606.ENSP00000335153,9606.ENSP00000338934,9606.ENSP00000339063,9606.ENSP00000339191,9606.ENSP00000340019,9606.ENSP00000346300,9606.ENSP00000349259,9606.ENSP00000353731,9606.ENSP00000354251,9606.ENSP00000357051,9606.ENSP00000360269,9606.ENSP00000366109,9606.ENSP00000373905,…	MAPK1,MYH9,SLC4A1,ANK1,CLTB,TLN1,HSP90AA1,EZR,EEF1A1,CAV1,HSPD1,CRKL,SPTBN1,DPP4,NCKAP1,PEX19,TACSTD2,ANXA1,DNM2,RHOA,ENO2,DNM1L,CLTC,SEPTIN2,AP2B1,EPPK1
GO:0120025	Plasma membrane bounded cell projection	45	2268	1.98413	0.34	1.57e-05	9606.ENSP00000215832,9606.ENSP00000216181,9606.ENSP00000219150,9606.ENSP00000252699,9606.ENSP00000254722,9606.ENSP00000265709,9606.ENSP00000268182,9606.ENSP00000299138,9606.ENSP00000303356,9606.ENSP00000309415,9606.ENSP00000312999,9606.ENSP00000316029,9606.ENSP00000320171,9606.ENSP00000335153,9606.ENSP00000338934,9606.ENSP00000339063,9606.ENSP00000339191,9606.ENSP00000340019,9606.ENSP00000348965,…	MAPK1,MYH9,CORO1A,ACTN4,SERPINF1,ANK1,IQGAP1,VPS35,DCXR,CLTB,GNAI2,TLN1,PKM,HSP90AA1,EZR,EEF1A1,CAV1,HSPD1,DYNC1H1,SPTBN1,DPP4,NCKAP1,GSTM3,COMT,COPA,PEX19,S100A6,FLNA,VDAC2,CLIC4,ANXA1,GNB1,DNM2,NME2,ACTN1,ERO1A,SEPTIN9,GDI1,RHOA,SEPTIN11,RACK1,DPYSL2,ENO2,ACTG1,SEPTIN2
GO:0012506	Vesicle membrane	24	1209	1.98511	0.34	0.0062	9606.ENSP00000219150,9606.ENSP00000236671,9606.ENSP00000268182,9606.ENSP00000269886,9606.ENSP00000299138,9606.ENSP00000309415,9606.ENSP00000339191,9606.ENSP00000346550,9606.ENSP00000356218,9606.ENSP00000357048,9606.ENSP00000357288,9606.ENSP00000363500,9606.ENSP00000366109,9606.ENSP00000373312,9606.ENSP00000373905,9606.ENSP00000376345,9606.ENSP00000378721,9606.ENSP00000400175,9606.ENSP00000405926,…	CORO1A,CTSD,IQGAP1,SH3GL1,VPS35,CLTB,CAV1,ANXA6,CYB5R1,COPA,LAMTOR2,CLIC4,ANXA1,SEC13,DNM2,GRB2,SEC31A,RHOA,TMED7,DNM1L,CLTC,AP2B1,STING1,CD59
GO:0098796	Membrane protein complex	24	1218	1.97044	0.33	0.0067	9606.ENSP00000299138,9606.ENSP00000305230,9606.ENSP00000305260,9606.ENSP00000309415,9606.ENSP00000312999,9606.ENSP00000317159,9606.ENSP00000339191,9606.ENSP00000340019,9606.ENSP00000355771,9606.ENSP00000357048,9606.ENSP00000357288,9606.ENSP00000358866,9606.ENSP00000361635,9606.ENSP00000363500,9606.ENSP00000364935,9606.ENSP00000367872,9606.ENSP00000373312,9606.ENSP00000376345,9606.ENSP00000378721,…	VPS35,SRP9,GNB2,CLTB,GNAI2,CYC1,CAV1,HSPD1,AFDN,COPA,LAMTOR2,FLNA,VDAC2,CLIC4,CLIC1,GNB1,SEC13,GRB2,SEC31A,TMED7,CLIC3,CLTC,AP2B1,STING1
GO:0030659	Cytoplasmic vesicle membrane	23	1190	1.93277	0.33	0.0101	9606.ENSP00000219150,9606.ENSP00000236671,9606.ENSP00000268182,9606.ENSP00000269886,9606.ENSP00000299138,9606.ENSP00000309415,9606.ENSP00000339191,9606.ENSP00000346550,9606.ENSP00000356218,9606.ENSP00000357048,9606.ENSP00000357288,9606.ENSP00000363500,9606.ENSP00000366109,9606.ENSP00000373312,9606.ENSP00000373905,9606.ENSP00000378721,9606.ENSP00000400175,9606.ENSP00000405926,9606.ENSP00000449089,…	CORO1A,CTSD,IQGAP1,SH3GL1,VPS35,CLTB,CAV1,ANXA6,CYB5R1,COPA,LAMTOR2,CLIC4,ANXA1,SEC13,DNM2,SEC31A,RHOA,TMED7,DNM1L,CLTC,AP2B1,STING1,CD59
GO:0005768	Endosome	20	1030	1.94175	0.33	0.0205	9606.ENSP00000215832,9606.ENSP00000219150,9606.ENSP00000236671,9606.ENSP00000269886,9606.ENSP00000298510,9606.ENSP00000299138,9606.ENSP00000338934,9606.ENSP00000339191,9606.ENSP00000340019,9606.ENSP00000346550,9606.ENSP00000357288,9606.ENSP00000366109,9606.ENSP00000373905,9606.ENSP00000376345,9606.ENSP00000400175,9606.ENSP00000411825,9606.ENSP00000477781,9606.ENSP00000479606,9606.ENSP00000483185,…	MAPK1,CORO1A,CTSD,SH3GL1,PRDX3,VPS35,EZR,CAV1,HSPD1,ANXA6,LAMTOR2,ANXA1,DNM2,GRB2,RHOA,PDCD6IP,TPT1,CLTC,AP2B1,STING1
GO:0032991	Protein-containing complex	102	5506	1.85252	0.31	1e-13	9606.ENSP00000205948,9606.ENSP00000216181,9606.ENSP00000216802,9606.ENSP00000219150,9606.ENSP00000221419,9606.ENSP00000221566,9606.ENSP00000245907,9606.ENSP00000248342,9606.ENSP00000252699,9606.ENSP00000253363,9606.ENSP00000253496,9606.ENSP00000258091,9606.ENSP00000261574,9606.ENSP00000264758,9606.ENSP00000268182,9606.ENSP00000269848,9606.ENSP00000270625,9606.ENSP00000295688,9606.ENSP00000295897,…	APOH,MYH9,PSME2,CORO1A,HNRNPL,SGTA,C3,EIF3K,ACTN4,RBM39,F12,CCT7,IPO5,ADD1,IQGAP1,PFKL,RPS11,CCT3,ALB,PRDX3,VPS35,DDB1,SRP9,GNB2,EEF2,CLTB,RBM14,PDLIM2,GNAI2,CYC1,HADHB,HSP90AA1,SF3B1,EZR,EEF1A1,CAV1,HSPD1,RPS2,RPL27A,RPL22,CRKL,HP,DYNC1H1,SPTBN1,NCKAP1,RPL12,CAPZA2,AFDN,CFH,COPA,PEX19,EPB41L2,LAMTOR2,FLNA,RPL5,PDLIM1,VDAC2,RPS4X,CLIC4,CLIC1,GNB1,IPO7,HADHA,SEC13,DNM2,XRCC5,HNRNPA3,GRB2,CCT4,SEC3…
GO:0015630	Microtubule cytoskeleton	25	1355	1.84502	0.31	0.011	9606.ENSP00000215832,9606.ENSP00000216181,9606.ENSP00000248437,9606.ENSP00000253363,9606.ENSP00000258091,9606.ENSP00000268182,9606.ENSP00000295688,9606.ENSP00000303356,9606.ENSP00000312999,9606.ENSP00000338934,9606.ENSP00000348965,9606.ENSP00000363500,9606.ENSP00000373905,9606.ENSP00000377192,9606.ENSP00000377958,9606.ENSP00000380070,9606.ENSP00000391249,9606.ENSP00000411825,9606.ENSP00000418447,…	MAPK1,MYH9,TUBA4A,RBM39,CCT7,IQGAP1,CCT3,DCXR,GNAI2,EZR,DYNC1H1,CLIC4,DNM2,G6PD,CCT4,GAPDH,SEPTIN9,PDCD6IP,PPP2CA,SEPTIN11,TUBA1C,DNM1L,TPT1,CLTC,SEPTIN2
GO:0043005	Neuron projection	25	1391	1.79727	0.29	0.0154	9606.ENSP00000219150,9606.ENSP00000252699,9606.ENSP00000254722,9606.ENSP00000265709,9606.ENSP00000268182,9606.ENSP00000299138,9606.ENSP00000312999,9606.ENSP00000335153,9606.ENSP00000348965,9606.ENSP00000349259,9606.ENSP00000354511,9606.ENSP00000357048,9606.ENSP00000358866,9606.ENSP00000367872,9606.ENSP00000373905,9606.ENSP00000377941,9606.ENSP00000379042,9606.ENSP00000394071,9606.ENSP00000400175,…	CORO1A,ACTN4,SERPINF1,ANK1,IQGAP1,VPS35,GNAI2,HSP90AA1,DYNC1H1,SPTBN1,COMT,COPA,FLNA,GNB1,DNM2,ACTN1,ERO1A,GDI1,RHOA,SEPTIN11,RACK1,DPYSL2,ENO2,ACTG1,SEPTIN2
GO:0012505	Endomembrane system	80	4721	1.69456	0.27	7.93e-08	9606.ENSP00000205948,9606.ENSP00000215832,9606.ENSP00000216181,9606.ENSP00000219150,9606.ENSP00000225371,9606.ENSP00000226299,9606.ENSP00000228740,9606.ENSP00000236671,9606.ENSP00000245907,9606.ENSP00000252699,9606.ENSP00000253496,9606.ENSP00000261574,9606.ENSP00000264613,9606.ENSP00000265709,9606.ENSP00000268182,9606.ENSP00000269848,9606.ENSP00000269886,9606.ENSP00000273784,9606.ENSP00000277865,…	APOH,MAPK1,MYH9,CORO1A,EPX,LAP3,LTA4H,CTSD,C3,ACTN4,F12,IPO5,CP,ANK1,IQGAP1,PFKL,SH3GL1,AHSG,GLUD1,FERMT3,ALB,PRDX3,VPS35,PA2G4,LMAN2,FASN,SRP9,EEF2,CLTB,PKM,HADHB,BGN,HSP90AA1,EZR,EEF1A1,CAV1,HSPD1,RPL27A,ANXA6,HP,DYNC1H1,CYB5R1,COPA,LAMTOR2,S100A6,FLNA,RPL5,PGM1,VDAC2,CAP1,CLIC1,ANXA1,ESD,IPO7,SEC13,DNM2,HNRNPUL1,XRCC5,GRB2,NME2,ACTN1,SEC31A,KTN1,ERO1A,GAPDH,GDI1,RHOA,TMED7,PDCD6IP,PPIA,ACSL1,D…
GO:0070013	Intracellular organelle lumen	94	5660	1.66078	0.26	2.69e-09	9606.ENSP00000157600,9606.ENSP00000205948,9606.ENSP00000215832,9606.ENSP00000216181,9606.ENSP00000216802,9606.ENSP00000221419,9606.ENSP00000225371,9606.ENSP00000225698,9606.ENSP00000226299,9606.ENSP00000228740,9606.ENSP00000236671,9606.ENSP00000245206,9606.ENSP00000245907,9606.ENSP00000252699,9606.ENSP00000253363,9606.ENSP00000261574,9606.ENSP00000261733,9606.ENSP00000263368,9606.ENSP00000263579,…	LMCD1,APOH,MAPK1,MYH9,PSME2,HNRNPL,EPX,C1QBP,LAP3,LTA4H,CTSD,GOT2,C3,ACTN4,RBM39,IPO5,ALDH2,BLVRB,DCPS,CP,ADD1,PFKL,RPS11,AHSG,GLUD1,FERMT3,AKR1B1,ALB,PRDX3,DDB1,PA2G4,PCBP1,ADH1B,EEF2,RBM14,GNAI2,PKM,HADHB,BGN,HSP90AA1,SF3B1,EZR,EEF1A1,HSPD1,RPS2,CRKL,HP,DYNC1H1,SPTBN1,RPL12,AFDN,PEX19,EPB41L2,FLNA,RPL5,FUBP1,PGM1,VDAC2,CAP1,GLO1,RPS4X,CLIC4,TXN,ANXA1,ESD,IPO7,HADHA,SEC13,HNRNPUL1,XRCC5,HNRNPA3,…
GO:0043232	Intracellular non-membrane-bounded organelle	87	5191	1.67598	0.26	1.66e-08	9606.ENSP00000215832,9606.ENSP00000216181,9606.ENSP00000219150,9606.ENSP00000221419,9606.ENSP00000225655,9606.ENSP00000225698,9606.ENSP00000248437,9606.ENSP00000252456,9606.ENSP00000252699,9606.ENSP00000253363,9606.ENSP00000258091,9606.ENSP00000261574,9606.ENSP00000262418,9606.ENSP00000263579,9606.ENSP00000264758,9606.ENSP00000265709,9606.ENSP00000268182,9606.ENSP00000269886,9606.ENSP00000270625,…	MAPK1,MYH9,CORO1A,HNRNPL,PFN1,C1QBP,TUBA4A,CNN1,ACTN4,RBM39,CCT7,IPO5,SLC4A1,DCPS,ADD1,ANK1,IQGAP1,SH3GL1,RPS11,FERMT3,CCT3,DDB1,PA2G4,DCXR,PCBP1,RBM14,PDLIM2,GNAI2,TLN1,HADHB,SF3B1,EZR,EEF1A1,CAV1,PPL,RPS2,RPL27A,RPL22,DYNC1H1,SPTBN1,NCKAP1,RPL12,CAPZA2,EPB41L2,FLNA,CNN3,RPL5,PDLIM1,VDAC2,CAP1,RPS4X,CLIC4,HADHA,DNM2,XRCC5,GRB2,TAGLN,G6PD,ACTN1,CCT4,PPP1CB,RPL14,GAPDH,RPSA,SEPTIN9,SNRPG,RHOA,PDCD…
GO:0098588	Bounding membrane of organelle	35	2125	1.64706	0.26	0.0082	9606.ENSP00000219150,9606.ENSP00000236671,9606.ENSP00000264613,9606.ENSP00000268182,9606.ENSP00000269886,9606.ENSP00000299138,9606.ENSP00000303366,9606.ENSP00000305230,9606.ENSP00000305260,9606.ENSP00000309415,9606.ENSP00000325136,9606.ENSP00000339063,9606.ENSP00000339191,9606.ENSP00000346550,9606.ENSP00000353731,9606.ENSP00000356218,9606.ENSP00000357048,9606.ENSP00000357051,9606.ENSP00000357288,…	CORO1A,CTSD,CP,IQGAP1,SH3GL1,VPS35,LMAN2,SRP9,GNB2,CLTB,HADHB,EEF1A1,CAV1,ANXA6,DPP4,CYB5R1,COPA,PEX19,LAMTOR2,VDAC2,ANXA1,GNB1,SEC13,DNM2,SEC31A,RHOA,TMED7,ACSL1,DNM1L,CLTC,SEPTIN2,AP2B1,ENO1,STING1,CD59
GO:0071944	Cell periphery	97	6015	1.61264	0.25	4.87e-09	9606.ENSP00000205948,9606.ENSP00000215832,9606.ENSP00000216181,9606.ENSP00000219150,9606.ENSP00000225655,9606.ENSP00000225698,9606.ENSP00000228318,9606.ENSP00000236671,9606.ENSP00000245206,9606.ENSP00000245907,9606.ENSP00000252699,9606.ENSP00000253496,9606.ENSP00000254722,9606.ENSP00000262418,9606.ENSP00000263368,9606.ENSP00000264613,9606.ENSP00000264758,9606.ENSP00000265709,9606.ENSP00000268182,…	APOH,MAPK1,MYH9,CORO1A,PFN1,C1QBP,SLC25A3,CTSD,GOT2,C3,ACTN4,F12,SERPINF1,SLC4A1,BLVRB,CP,ADD1,ANK1,IQGAP1,TINAGL1,AHSG,RNPEP,DCXR,LMAN2,FASN,GNB2,ADH1B,EEF2,CLTB,PDLIM2,GNAI2,TLN1,PKM,BGN,HSP90AA1,LIMS1,EZR,EEF1A1,CAV1,HSPD1,PPL,CRKL,ANXA6,DYNC1H1,SPTBN1,DPP4,NCKAP1,COMT,CAPZA2,AFDN,CYB5R1,PEX19,EPB41L2,LAMTOR2,S100A6,FLNA,TACSTD2,CAP1,GLO1,CLIC4,CLIC1,ANXA1,GNB1,DNM2,XRCC5,GRB2,NME2,G6PD,ACTN1,…
GO:0005886	Plasma membrane	82	5544	1.47908	0.21	1.93e-05	9606.ENSP00000215832,9606.ENSP00000216181,9606.ENSP00000219150,9606.ENSP00000225698,9606.ENSP00000228318,9606.ENSP00000245206,9606.ENSP00000245907,9606.ENSP00000252699,9606.ENSP00000253496,9606.ENSP00000262418,9606.ENSP00000263368,9606.ENSP00000264613,9606.ENSP00000264758,9606.ENSP00000265709,9606.ENSP00000268182,9606.ENSP00000295640,9606.ENSP00000303356,9606.ENSP00000303366,9606.ENSP00000304592,…	MAPK1,MYH9,CORO1A,C1QBP,SLC25A3,GOT2,C3,ACTN4,F12,SLC4A1,BLVRB,CP,ADD1,ANK1,IQGAP1,RNPEP,DCXR,LMAN2,FASN,GNB2,ADH1B,EEF2,CLTB,GNAI2,TLN1,BGN,HSP90AA1,LIMS1,EZR,EEF1A1,CAV1,HSPD1,PPL,CRKL,SPTBN1,DPP4,NCKAP1,COMT,AFDN,CYB5R1,PEX19,EPB41L2,LAMTOR2,S100A6,FLNA,TACSTD2,CAP1,GLO1,CLIC4,CLIC1,ANXA1,GNB1,DNM2,XRCC5,GRB2,G6PD,ACTN1,KTN1,PPP1CB,GAPDH,RPSA,RHOA,HNRNPF,PDCD6IP,PPP2CA,FLNB,ACSL1,RACK1,WDR1,DP…
GO:0005737	Cytoplasm	170	12056	1.41009	0.19	1.09e-22	9606.ENSP00000157600,9606.ENSP00000205948,9606.ENSP00000215832,9606.ENSP00000216181,9606.ENSP00000216802,9606.ENSP00000219150,9606.ENSP00000221419,9606.ENSP00000221566,9606.ENSP00000225371,9606.ENSP00000225655,9606.ENSP00000225698,9606.ENSP00000226299,9606.ENSP00000228318,9606.ENSP00000228740,9606.ENSP00000236671,9606.ENSP00000245206,9606.ENSP00000245907,9606.ENSP00000248342,9606.ENSP00000248437,…	LMCD1,APOH,MAPK1,MYH9,PSME2,CORO1A,HNRNPL,SGTA,EPX,PFN1,C1QBP,LAP3,SLC25A3,LTA4H,CTSD,GOT2,C3,EIF3K,TUBA4A,PGLS,ACTN4,F12,SERPINF1,CCT7,IPO5,ALDH2,SLC4A1,BLVRB,DCPS,CP,ADD1,ANK1,IQGAP1,PFKL,SH3GL1,RPS11,TINAGL1,AHSG,GLUD1,FERMT3,AKR1B1,CCT3,ALB,METAP1,PRDX3,VPS35,DDB1,PA2G4,DCXR,LMAN2,FASN,SRP9,GNB2,PCBP1,ADH1B,EEF2,CLTB,RBM14,PDLIM2,GNAI2,TLN1,CYC1,PKM,HADHB,BGN,HSP90AA1,LIMS1,EZR,EEF1A1,CAV1,HS…
GO:0031981	Nuclear lumen	63	4526	1.39196	0.18	0.004	9606.ENSP00000157600,9606.ENSP00000215832,9606.ENSP00000216181,9606.ENSP00000216802,9606.ENSP00000221419,9606.ENSP00000225698,9606.ENSP00000226299,9606.ENSP00000228740,9606.ENSP00000252699,9606.ENSP00000253363,9606.ENSP00000261574,9606.ENSP00000263368,9606.ENSP00000263579,9606.ENSP00000264758,9606.ENSP00000270625,9606.ENSP00000285930,9606.ENSP00000301764,9606.ENSP00000302886,9606.ENSP00000305556,…	LMCD1,MAPK1,MYH9,PSME2,HNRNPL,C1QBP,LAP3,LTA4H,ACTN4,RBM39,IPO5,BLVRB,DCPS,ADD1,RPS11,AKR1B1,DDB1,PA2G4,PCBP1,ADH1B,RBM14,GNAI2,HSP90AA1,SF3B1,EZR,EEF1A1,RPS2,CRKL,SPTBN1,RPL12,AFDN,PEX19,EPB41L2,FLNA,RPL5,FUBP1,GLO1,RPS4X,CLIC4,TXN,ANXA1,IPO7,SEC13,HNRNPUL1,XRCC5,HNRNPA3,GRB2,CCT4,PPP1CB,CSTF2,RPSA,SNRPG,HNRNPF,DDX39B,CLIC3,RACK1,RNH1,RPS5,TPT1,SEPTIN2,EPPK1,CPSF1,STING1
GO:0043227	Membrane-bounded organelle	170	13188	1.28905	0.15	5.76e-17	9606.ENSP00000157600,9606.ENSP00000205948,9606.ENSP00000215832,9606.ENSP00000216181,9606.ENSP00000216802,9606.ENSP00000219150,9606.ENSP00000221419,9606.ENSP00000221566,9606.ENSP00000225371,9606.ENSP00000225655,9606.ENSP00000225698,9606.ENSP00000226299,9606.ENSP00000228318,9606.ENSP00000228740,9606.ENSP00000236671,9606.ENSP00000245206,9606.ENSP00000245907,9606.ENSP00000248342,9606.ENSP00000248437,…	LMCD1,APOH,MAPK1,MYH9,PSME2,CORO1A,HNRNPL,SGTA,EPX,PFN1,C1QBP,LAP3,SLC25A3,LTA4H,CTSD,GOT2,C3,EIF3K,TUBA4A,PGLS,ACTN4,RBM39,F12,SERPINF1,CCT7,IPO5,ALDH2,SLC4A1,BLVRB,DCPS,CP,ADD1,ANK1,IQGAP1,PFKL,SH3GL1,RPS11,TINAGL1,AHSG,GLUD1,FERMT3,AKR1B1,PGLYRP2,RNPEP,CCT3,ALB,PRDX3,VPS35,DDB1,PA2G4,DCXR,LMAN2,FASN,SRP9,GNB2,PCBP1,ADH1B,EEF2,CLTB,RBM14,PDLIM2,GNAI2,TLN1,CYC1,PKM,HADHB,BGN,HSP90AA1,SF3B1,EZR,E…
GO:0016020	Membrane	124	9523	1.30211	0.15	8.64e-07	9606.ENSP00000215832,9606.ENSP00000216181,9606.ENSP00000216802,9606.ENSP00000219150,9606.ENSP00000221419,9606.ENSP00000221566,9606.ENSP00000225655,9606.ENSP00000225698,9606.ENSP00000228318,9606.ENSP00000236671,9606.ENSP00000245206,9606.ENSP00000245907,9606.ENSP00000248342,9606.ENSP00000252699,9606.ENSP00000253496,9606.ENSP00000261574,9606.ENSP00000262418,9606.ENSP00000263368,9606.ENSP00000264613,…	MAPK1,MYH9,PSME2,CORO1A,HNRNPL,SGTA,PFN1,C1QBP,SLC25A3,CTSD,GOT2,C3,EIF3K,ACTN4,F12,IPO5,SLC4A1,BLVRB,CP,ADD1,ANK1,IQGAP1,PFKL,SH3GL1,RPS11,FERMT3,PGLYRP2,RNPEP,VPS35,PA2G4,DCXR,LMAN2,FASN,SRP9,GNB2,PCBP1,ADH1B,EEF2,CLTB,GNAI2,TLN1,CYC1,HADHB,BGN,HSP90AA1,LIMS1,EZR,EEF1A1,CAV1,HSPD1,PPL,RPS2,RPL27A,CRKL,ANXA6,DYNC1H1,SPTBN1,DPP4,NCKAP1,COMT,RPL12,CAPZA2,AFDN,CYB5R1,COPA,PEX19,EPB41L2,LAMTOR2,S100…
GO:0043226	Organelle	176	14017	1.25562	0.14	6.85e-19	9606.ENSP00000157600,9606.ENSP00000205948,9606.ENSP00000215832,9606.ENSP00000216181,9606.ENSP00000216802,9606.ENSP00000219150,9606.ENSP00000221419,9606.ENSP00000221566,9606.ENSP00000225371,9606.ENSP00000225655,9606.ENSP00000225698,9606.ENSP00000226299,9606.ENSP00000228318,9606.ENSP00000228740,9606.ENSP00000236671,9606.ENSP00000245206,9606.ENSP00000245907,9606.ENSP00000248342,9606.ENSP00000248437,…	LMCD1,APOH,MAPK1,MYH9,PSME2,CORO1A,HNRNPL,SGTA,EPX,PFN1,C1QBP,LAP3,SLC25A3,LTA4H,CTSD,GOT2,C3,EIF3K,TUBA4A,CNN1,PGLS,ACTN4,RBM39,F12,SERPINF1,CCT7,IPO5,ALDH2,SLC4A1,BLVRB,DCPS,CP,ADD1,ANK1,IQGAP1,PFKL,SH3GL1,RPS11,TINAGL1,AHSG,GLUD1,FERMT3,AKR1B1,PGLYRP2,RNPEP,CCT3,ALB,PRDX3,VPS35,DDB1,PA2G4,DCXR,LMAN2,FASN,SRP9,GNB2,PCBP1,ADH1B,EEF2,CLTB,RBM14,PDLIM2,GNAI2,TLN1,CYC1,PKM,HADHB,BGN,HSP90AA1,SF3B1,…
GO:0043229	Intracellular organelle	168	13231	1.26975	0.14	4.32e-15	9606.ENSP00000157600,9606.ENSP00000205948,9606.ENSP00000215832,9606.ENSP00000216181,9606.ENSP00000216802,9606.ENSP00000219150,9606.ENSP00000221419,9606.ENSP00000221566,9606.ENSP00000225371,9606.ENSP00000225655,9606.ENSP00000225698,9606.ENSP00000226299,9606.ENSP00000228318,9606.ENSP00000228740,9606.ENSP00000236671,9606.ENSP00000245206,9606.ENSP00000245907,9606.ENSP00000248342,9606.ENSP00000248437,…	LMCD1,APOH,MAPK1,MYH9,PSME2,CORO1A,HNRNPL,SGTA,EPX,PFN1,C1QBP,LAP3,SLC25A3,LTA4H,CTSD,GOT2,C3,EIF3K,TUBA4A,CNN1,ACTN4,RBM39,F12,SERPINF1,CCT7,IPO5,ALDH2,SLC4A1,BLVRB,DCPS,CP,ADD1,ANK1,IQGAP1,PFKL,SH3GL1,RPS11,TINAGL1,AHSG,GLUD1,FERMT3,AKR1B1,CCT3,ALB,PRDX3,VPS35,DDB1,PA2G4,DCXR,LMAN2,FASN,SRP9,GNB2,PCBP1,ADH1B,EEF2,CLTB,RBM14,PDLIM2,GNAI2,TLN1,CYC1,PKM,HADHB,BGN,HSP90AA1,SF3B1,EZR,EEF1A1,CAV1,HSP…
GO:0043231	Intracellular membrane-bounded organelle	149	12149	1.22644	0.13	3.62e-08	9606.ENSP00000157600,9606.ENSP00000205948,9606.ENSP00000215832,9606.ENSP00000216181,9606.ENSP00000216802,9606.ENSP00000219150,9606.ENSP00000221419,9606.ENSP00000221566,9606.ENSP00000225371,9606.ENSP00000225655,9606.ENSP00000225698,9606.ENSP00000226299,9606.ENSP00000228318,9606.ENSP00000228740,9606.ENSP00000236671,9606.ENSP00000245206,9606.ENSP00000245907,9606.ENSP00000248342,9606.ENSP00000252699,…	LMCD1,APOH,MAPK1,MYH9,PSME2,CORO1A,HNRNPL,SGTA,EPX,PFN1,C1QBP,LAP3,SLC25A3,LTA4H,CTSD,GOT2,C3,EIF3K,ACTN4,RBM39,F12,SERPINF1,IPO5,ALDH2,BLVRB,DCPS,CP,ADD1,ANK1,IQGAP1,PFKL,SH3GL1,RPS11,TINAGL1,AHSG,GLUD1,FERMT3,AKR1B1,ALB,PRDX3,VPS35,DDB1,PA2G4,DCXR,LMAN2,FASN,SRP9,GNB2,PCBP1,ADH1B,EEF2,CLTB,RBM14,PDLIM2,GNAI2,CYC1,PKM,HADHB,BGN,HSP90AA1,SF3B1,EZR,EEF1A1,CAV1,HSPD1,RPS2,RPL27A,RPL22,CRKL,ANXA6,HP…
GO:0005634	Nucleus	92	7672	1.19917	0.12	0.0103	9606.ENSP00000157600,9606.ENSP00000215832,9606.ENSP00000216181,9606.ENSP00000216802,9606.ENSP00000221419,9606.ENSP00000221566,9606.ENSP00000225655,9606.ENSP00000225698,9606.ENSP00000226299,9606.ENSP00000228740,9606.ENSP00000248342,9606.ENSP00000252699,9606.ENSP00000253363,9606.ENSP00000261574,9606.ENSP00000263368,9606.ENSP00000263579,9606.ENSP00000264758,9606.ENSP00000268182,9606.ENSP00000270625,…	LMCD1,MAPK1,MYH9,PSME2,HNRNPL,SGTA,PFN1,C1QBP,LAP3,LTA4H,EIF3K,ACTN4,RBM39,IPO5,BLVRB,DCPS,ADD1,IQGAP1,RPS11,AKR1B1,ALB,DDB1,PA2G4,DCXR,PCBP1,ADH1B,EEF2,RBM14,PDLIM2,GNAI2,CYC1,PKM,HSP90AA1,SF3B1,EZR,EEF1A1,RPS2,RPL22,CRKL,SPTBN1,GSTM3,RPL12,AFDN,PEX19,EPB41L2,S100A6,FLNA,RPL5,FUBP1,TACSTD2,VDAC2,GLO1,RPS4X,CLIC4,TXN,CLIC1,ANXA1,IPO7,SEC13,DNM2,HNRNPUL1,XRCC5,HNRNPA3,GRB2,NME2,G6PD,ACTN1,CCT4,PPP…
GO:0005622	Intracellular anatomical structure	176	14891	1.18192	0.11	9.35e-15	9606.ENSP00000157600,9606.ENSP00000205948,9606.ENSP00000215832,9606.ENSP00000216181,9606.ENSP00000216802,9606.ENSP00000219150,9606.ENSP00000221419,9606.ENSP00000221566,9606.ENSP00000225371,9606.ENSP00000225655,9606.ENSP00000225698,9606.ENSP00000226299,9606.ENSP00000228318,9606.ENSP00000228740,9606.ENSP00000236671,9606.ENSP00000245206,9606.ENSP00000245907,9606.ENSP00000248342,9606.ENSP00000248437,…	LMCD1,APOH,MAPK1,MYH9,PSME2,CORO1A,HNRNPL,SGTA,EPX,PFN1,C1QBP,LAP3,SLC25A3,LTA4H,CTSD,GOT2,C3,EIF3K,TUBA4A,CNN1,PGLS,ACTN4,RBM39,F12,SERPINF1,CCT7,IPO5,ALDH2,SLC4A1,BLVRB,DCPS,CP,ADD1,ANK1,IQGAP1,PFKL,SH3GL1,RPS11,TINAGL1,AHSG,GLUD1,FERMT3,AKR1B1,CCT3,ALB,METAP1,PRDX3,VPS35,DDB1,PA2G4,DCXR,LMAN2,FASN,SRP9,GNB2,PCBP1,ADH1B,EEF2,CLTB,RBM14,PDLIM2,GNAI2,TLN1,CYC1,PKM,HADHB,BGN,HSP90AA1,SF3B1,LIMS1,E…
GO:0110165	Cellular anatomical entity	180	18293	0.983983	0.03	5.72e-05	9606.ENSP00000157600,9606.ENSP00000205948,9606.ENSP00000215832,9606.ENSP00000216181,9606.ENSP00000216802,9606.ENSP00000219150,9606.ENSP00000221419,9606.ENSP00000221566,9606.ENSP00000225371,9606.ENSP00000225655,9606.ENSP00000225698,9606.ENSP00000226299,9606.ENSP00000228318,9606.ENSP00000228740,9606.ENSP00000236671,9606.ENSP00000245206,9606.ENSP00000245907,9606.ENSP00000248342,9606.ENSP00000248437,…	LMCD1,APOH,MAPK1,MYH9,PSME2,CORO1A,HNRNPL,SGTA,EPX,PFN1,C1QBP,LAP3,SLC25A3,LTA4H,CTSD,GOT2,C3,EIF3K,TUBA4A,CNN1,PGLS,ACTN4,RBM39,F12,SERPINF1,CCT7,IPO5,ALDH2,SLC4A1,BLVRB,DCPS,CP,ADD1,ANK1,IQGAP1,PFKL,SH3GL1,RPS11,TINAGL1,AHSG,GLUD1,FERMT3,AKR1B1,PGLYRP2,RNPEP,CCT3,ALB,METAP1,PRDX3,VPS35,DDB1,PA2G4,DCXR,LMAN2,FASN,SRP9,GNB2,PCBP1,ADH1B,EEF2,CLTB,RBM14,PDLIM2,GNAI2,TLN1,CYC1,PKM,HADHB,BGN,HSP90AA1…

## Sheet: GOBP_REDOX
Term ID	Term description	Observed gene count	Background gene count	Genes (%)	Strength	FDR	Matching proteins (IDs)	Matching proteins (labels)
GO:1903179	Regulation of dopamine biosynthetic process	3	3	100	1.74	0.0051	9606.ENSP00000261733,9606.ENSP00000299138,9606.ENSP00000340278	ALDH2,VPS35,PARK7
GO:1905323	Telomerase holoenzyme complex assembly	3	4	75	1.61	0.0081	9606.ENSP00000335153,9606.ENSP00000360609,9606.ENSP00000482075	HSP90AA1,HSP90AB1,PTGES3
GO:0031639	Plasminogen activation	6	11	54.5455	1.47	4.12e-05	9606.ENSP00000205948,9606.ENSP00000264690,9606.ENSP00000306099,9606.ENSP00000336829,9606.ENSP00000362413,9606.ENSP00000498441	APOH,KLKB1,FGB,FGG,PGK1,FGA
GO:0009438	Methylglyoxal metabolic process	3	7	42.8571	1.37	0.0217	9606.ENSP00000340278,9606.ENSP00000362463,9606.ENSP00000380514	PARK7,GLO1,HAGH
GO:0045964	Positive regulation of dopamine metabolic process	3	7	42.8571	1.37	0.0217	9606.ENSP00000298556,9606.ENSP00000299138,9606.ENSP00000340278	HPRT1,VPS35,PARK7
GO:0042730	Fibrinolysis	8	19	42.1053	1.36	3.46e-06	9606.ENSP00000253496,9606.ENSP00000264690,9606.ENSP00000306099,9606.ENSP00000308541,9606.ENSP00000321853,9606.ENSP00000336829,9606.ENSP00000346032,9606.ENSP00000498441	F12,KLKB1,FGB,F2,SERPINF2,FGG,ANXA2,FGA
GO:1904851	Positive regulation of establishment of protein localization to telomere	4	10	40	1.34	0.0043	9606.ENSP00000258091,9606.ENSP00000280326,9606.ENSP00000295688,9606.ENSP00000377958	CCT7,CCT5,CCT3,CCT4
GO:1904816	Positive regulation of protein localization to chromosome, telomeric region	5	13	38.4615	1.32	0.0008	9606.ENSP00000258091,9606.ENSP00000268058,9606.ENSP00000280326,9606.ENSP00000295688,9606.ENSP00000377958	CCT7,PML,CCT5,CCT3,CCT4
GO:0002840	Regulation of T cell mediated immune response to tumor cell	3	8	37.5	1.31	0.0281	9606.ENSP00000340019,9606.ENSP00000345347,9606.ENSP00000353099	HSPD1,HMGB1,HLA-DRB1
GO:0006107	Oxaloacetate metabolic process	3	8	37.5	1.31	0.0281	9606.ENSP00000245206,9606.ENSP00000327070,9606.ENSP00000377696	GOT2,MDH2,NIT2
GO:0010756	Positive regulation of plasminogen activation	3	8	37.5	1.31	0.0281	9606.ENSP00000253496,9606.ENSP00000346032,9606.ENSP00000495530	F12,ANXA2,ENO1
GO:0044829	Positive regulation by host of viral genome replication	3	8	37.5	1.31	0.0281	9606.ENSP00000286713,9606.ENSP00000345656,9606.ENSP00000437125	STOM,VAPA,HSPA8
GO:0061684	Chaperone-mediated autophagy	3	8	37.5	1.31	0.0281	9606.ENSP00000335153,9606.ENSP00000358081,9606.ENSP00000437125	HSP90AA1,BAG3,HSPA8
GO:1903659	Regulation of complement-dependent cytotoxicity	3	8	37.5	1.31	0.0281	9606.ENSP00000356399,9606.ENSP00000360609,9606.ENSP00000498879	CFH,HSP90AB1,CD59
GO:1904871	Positive regulation of protein localization to Cajal body	4	11	36.3636	1.3	0.0055	9606.ENSP00000258091,9606.ENSP00000280326,9606.ENSP00000295688,9606.ENSP00000377958	CCT7,CCT5,CCT3,CCT4
GO:0072378	Blood coagulation, fibrin clot formation	8	24	33.3333	1.26	1.19e-05	9606.ENSP00000205948,9606.ENSP00000253496,9606.ENSP00000264690,9606.ENSP00000306099,9606.ENSP00000308541,9606.ENSP00000336829,9606.ENSP00000358866,9606.ENSP00000498441	APOH,F12,KLKB1,FGB,F2,FGG,FLNA,FGA
GO:0061621	Canonical glycolysis	5	16	31.25	1.23	0.0016	9606.ENSP00000269848,9606.ENSP00000320171,9606.ENSP00000362413,9606.ENSP00000437402,9606.ENSP00000495530	PFKL,PKM,PGK1,ENO2,ENO1
GO:0006098	Pentose-phosphate shunt	4	13	30.7692	1.23	0.0085	9606.ENSP00000252603,9606.ENSP00000321259,9606.ENSP00000352401,9606.ENSP00000377192	PGLS,TALDO1,RPE,G6PD
GO:0007597	Blood coagulation, intrinsic pathway	4	13	30.7692	1.23	0.0085	9606.ENSP00000205948,9606.ENSP00000253496,9606.ENSP00000264690,9606.ENSP00000358866	APOH,F12,KLKB1,FLNA
GO:0070527	Platelet aggregation	13	43	30.2326	1.22	1.9e-08	9606.ENSP00000216181,9606.ENSP00000279227,9606.ENSP00000296411,9606.ENSP00000306099,9606.ENSP00000316029,9606.ENSP00000319096,9606.ENSP00000336829,9606.ENSP00000358866,9606.ENSP00000364935,9606.ENSP00000419425,9606.ENSP00000458162,9606.ENSP00000494175,9606.ENSP00000498441	MYH9,FERMT3,METAP1,FGB,TLN1,RAP2B,FGG,FLNA,CLIC1,PPIA,ACTG1,HBB,FGA
GO:0033622	Integrin activation	3	10	30	1.21	0.0433	9606.ENSP00000279227,9606.ENSP00000303920,9606.ENSP00000316029	FERMT3,MZB1,TLN1
GO:0043653	Mitochondrial fragmentation involved in apoptotic process	3	10	30	1.21	0.0433	9606.ENSP00000223136,9606.ENSP00000299138,9606.ENSP00000449089	FIS1,VPS35,DNM1L
GO:0051917	Regulation of fibrinolysis	5	18	27.7778	1.18	0.0024	9606.ENSP00000205948,9606.ENSP00000253496,9606.ENSP00000264690,9606.ENSP00000308541,9606.ENSP00000321853	APOH,F12,KLKB1,F2,SERPINF2
GO:0010761	Fibroblast migration	5	19	26.3158	1.16	0.0029	9606.ENSP00000268058,9606.ENSP00000268182,9606.ENSP00000323856,9606.ENSP00000357288,9606.ENSP00000360305	PML,IQGAP1,PLEC,LAMTOR2,PDLIM1
GO:0034116	Positive regulation of heterotypic cell-cell adhesion	4	15	26.6667	1.16	0.0128	9606.ENSP00000306099,9606.ENSP00000336829,9606.ENSP00000398632,9606.ENSP00000498441	FGB,FGG,CD44,FGA
GO:0046185	Aldehyde catabolic process	4	15	26.6667	1.16	0.0128	9606.ENSP00000261733,9606.ENSP00000340278,9606.ENSP00000367992,9606.ENSP00000380514	ALDH2,PARK7,ESD,HAGH
GO:1904874	Positive regulation of telomerase RNA localization to Cajal body	4	15	26.6667	1.16	0.0128	9606.ENSP00000258091,9606.ENSP00000280326,9606.ENSP00000295688,9606.ENSP00000377958	CCT7,CCT5,CCT3,CCT4
GO:0006957	Complement activation, alternative pathway	4	16	25	1.13	0.015	9606.ENSP00000245907,9606.ENSP00000263408,9606.ENSP00000356399,9606.ENSP00000416561	C3,C9,CFH,CFB
GO:0006096	Glycolytic process	11	46	23.913	1.12	1.33e-06	9606.ENSP00000269848,9606.ENSP00000320171,9606.ENSP00000359991,9606.ENSP00000360124,9606.ENSP00000362413,9606.ENSP00000380070,9606.ENSP00000388183,9606.ENSP00000405573,9606.ENSP00000437402,9606.ENSP00000495530,9606.ENSP00000496166	PFKL,PKM,PGAM1,PGM1,PGK1,GAPDH,OGDH,GPI,ENO2,ENO1,ALDOA
GO:0006734	NADH metabolic process	8	34	23.5294	1.11	7.04e-05	9606.ENSP00000269848,9606.ENSP00000282541,9606.ENSP00000320171,9606.ENSP00000327070,9606.ENSP00000362413,9606.ENSP00000388183,9606.ENSP00000437402,9606.ENSP00000495530	PFKL,GPD1L,PKM,MDH2,PGK1,OGDH,ENO2,ENO1
GO:0019674	NAD metabolic process	7	31	22.5806	1.09	0.00033	9606.ENSP00000269848,9606.ENSP00000282541,9606.ENSP00000320171,9606.ENSP00000362413,9606.ENSP00000378782,9606.ENSP00000437402,9606.ENSP00000495530	PFKL,GPD1L,PKM,PGK1,QPRT,ENO2,ENO1
GO:0030449	Regulation of complement activation	5	22	22.7273	1.09	0.005	9606.ENSP00000225698,9606.ENSP00000245907,9606.ENSP00000323929,9606.ENSP00000356399,9606.ENSP00000498879	C1QBP,C3,A2M,CFH,CD59
GO:0051156	Glucose 6-phosphate metabolic process	5	22	22.7273	1.09	0.005	9606.ENSP00000252603,9606.ENSP00000321259,9606.ENSP00000352401,9606.ENSP00000377192,9606.ENSP00000405573	PGLS,TALDO1,RPE,G6PD,GPI
GO:0010954	Positive regulation of protein processing	6	27	22.2222	1.08	0.0014	9606.ENSP00000216181,9606.ENSP00000253496,9606.ENSP00000264690,9606.ENSP00000346032,9606.ENSP00000460236,9606.ENSP00000495530	MYH9,F12,KLKB1,ANXA2,SPON1,ENO1
GO:0010755	Regulation of plasminogen activation	4	18	22.2222	1.08	0.0203	9606.ENSP00000253496,9606.ENSP00000321853,9606.ENSP00000346032,9606.ENSP00000495530	F12,SERPINF2,ANXA2,ENO1
GO:2000641	Regulation of early endosome to late endosome transport	4	18	22.2222	1.08	0.0203	9606.ENSP00000215832,9606.ENSP00000261263,9606.ENSP00000338934,9606.ENSP00000481314	MAPK1,RAB21,EZR,SNX12
GO:0051131	Chaperone-mediated protein complex assembly	5	23	21.7391	1.07	0.0057	9606.ENSP00000335153,9606.ENSP00000340019,9606.ENSP00000360609,9606.ENSP00000364802,9606.ENSP00000482075	HSP90AA1,HSPD1,HSP90AB1,HSPA1A,PTGES3
GO:1900026	Positive regulation of substrate adhesion-dependent cell spreading	9	45	20	1.04	5.31e-05	9606.ENSP00000225698,9606.ENSP00000306099,9606.ENSP00000320866,9606.ENSP00000336829,9606.ENSP00000337598,9606.ENSP00000346300,9606.ENSP00000358866,9606.ENSP00000373905,9606.ENSP00000498441	C1QBP,FGB,CALR,FGG,LIMS1,CRKL,FLNA,DNM2,FGA
GO:0030866	Cortical actin cytoskeleton organization	8	40	20	1.04	0.00016	9606.ENSP00000316029,9606.ENSP00000320866,9606.ENSP00000323856,9606.ENSP00000338934,9606.ENSP00000354251,9606.ENSP00000357110,9606.ENSP00000381581,9606.ENSP00000411825	TLN1,CALR,PLEC,EZR,NCKAP1,EPB41L2,LCP1,PDCD6IP
GO:0042744	Hydrogen peroxide catabolic process	5	25	20	1.04	0.0077	9606.ENSP00000225275,9606.ENSP00000225371,9606.ENSP00000241052,9606.ENSP00000298510,9606.ENSP00000494175	MPO,EPX,CAT,PRDX3,HBB
GO:0030011	Maintenance of cell polarity	4	20	20	1.04	0.0273	9606.ENSP00000265709,9606.ENSP00000360305,9606.ENSP00000411825,9606.ENSP00000427687	ANK1,PDLIM1,PDCD6IP,WDR1
GO:0042053	Regulation of dopamine metabolic process	4	20	20	1.04	0.0273	9606.ENSP00000261733,9606.ENSP00000298556,9606.ENSP00000299138,9606.ENSP00000340278	ALDH2,HPRT1,VPS35,PARK7
GO:0030195	Negative regulation of blood coagulation	9	46	19.5652	1.03	6.01e-05	9606.ENSP00000205948,9606.ENSP00000253496,9606.ENSP00000264690,9606.ENSP00000306099,9606.ENSP00000308541,9606.ENSP00000321853,9606.ENSP00000336829,9606.ENSP00000346032,9606.ENSP00000498441	APOH,F12,KLKB1,FGB,F2,SERPINF2,FGG,ANXA2,FGA
GO:0006165	Nucleoside diphosphate phosphorylation	12	63	19.0476	1.02	2.19e-06	9606.ENSP00000269848,9606.ENSP00000320171,9606.ENSP00000359991,9606.ENSP00000360124,9606.ENSP00000362413,9606.ENSP00000376886,9606.ENSP00000380070,9606.ENSP00000388183,9606.ENSP00000405573,9606.ENSP00000437402,9606.ENSP00000495530,9606.ENSP00000496166	PFKL,PKM,PGAM1,PGM1,PGK1,NME2,GAPDH,OGDH,GPI,ENO2,ENO1,ALDOA
GO:0042743	Hydrogen peroxide metabolic process	7	37	18.9189	1.01	0.00078	9606.ENSP00000225275,9606.ENSP00000225371,9606.ENSP00000241052,9606.ENSP00000270142,9606.ENSP00000298510,9606.ENSP00000340278,9606.ENSP00000494175	MPO,EPX,CAT,SOD1,PRDX3,PARK7,HBB
GO:1900024	Regulation of substrate adhesion-dependent cell spreading	11	61	18.0328	0.99	1.08e-05	9606.ENSP00000225698,9606.ENSP00000252699,9606.ENSP00000306099,9606.ENSP00000320866,9606.ENSP00000336829,9606.ENSP00000337598,9606.ENSP00000346300,9606.ENSP00000358866,9606.ENSP00000360269,9606.ENSP00000373905,9606.ENSP00000498441	C1QBP,ACTN4,FGB,CALR,FGG,LIMS1,CRKL,FLNA,TACSTD2,DNM2,FGA
GO:0030194	Positive regulation of blood coagulation	5	28	17.8571	0.99	0.0115	9606.ENSP00000205948,9606.ENSP00000253496,9606.ENSP00000308541,9606.ENSP00000321853,9606.ENSP00000369677	APOH,F12,F2,SERPINF2,EMILIN1
GO:0009179	Purine ribonucleoside diphosphate metabolic process	12	68	17.6471	0.98	3.93e-06	9606.ENSP00000269848,9606.ENSP00000320171,9606.ENSP00000358547,9606.ENSP00000359991,9606.ENSP00000360124,9606.ENSP00000362413,9606.ENSP00000380070,9606.ENSP00000388183,9606.ENSP00000405573,9606.ENSP00000437402,9606.ENSP00000495530,9606.ENSP00000496166	PFKL,PKM,MPP1,PGAM1,PGM1,PGK1,GAPDH,OGDH,GPI,ENO2,ENO1,ALDOA
GO:0032212	Positive regulation of telomere maintenance via telomerase	6	34	17.6471	0.98	0.0036	9606.ENSP00000215832,9606.ENSP00000258091,9606.ENSP00000280326,9606.ENSP00000295688,9606.ENSP00000375978,9606.ENSP00000377958	MAPK1,CCT7,CCT5,CCT3,XRCC5,CCT4
GO:0051973	Positive regulation of telomerase activity	6	34	17.6471	0.98	0.0036	9606.ENSP00000215832,9606.ENSP00000335153,9606.ENSP00000360609,9606.ENSP00000375978,9606.ENSP00000377958,9606.ENSP00000482075	MAPK1,HSP90AA1,HSP90AB1,XRCC5,CCT4,PTGES3
GO:0031638	Zymogen activation	10	59	16.9492	0.97	4.84e-05	9606.ENSP00000205948,9606.ENSP00000253496,9606.ENSP00000264690,9606.ENSP00000306099,9606.ENSP00000308541,9606.ENSP00000336829,9606.ENSP00000348170,9606.ENSP00000362413,9606.ENSP00000444271,9606.ENSP00000498441	APOH,F12,KLKB1,FGB,F2,FGG,HP,PGK1,C1R,FGA
GO:0035036	Sperm-egg recognition	8	48	16.6667	0.96	0.00046	9606.ENSP00000258091,9606.ENSP00000280326,9606.ENSP00000295688,9606.ENSP00000298223,9606.ENSP00000361635,9606.ENSP00000377284,9606.ENSP00000377958,9606.ENSP00000496166	CCT7,CCT5,CCT3,FOLR2,VDAC2,FOLR1,CCT4,ALDOA
GO:0071353	Cellular response to interleukin-4	5	30	16.6667	0.96	0.0146	9606.ENSP00000219150,9606.ENSP00000268058,9606.ENSP00000304592,9606.ENSP00000360609,9606.ENSP00000386284	CORO1A,PML,FASN,HSP90AB1,ALAD
GO:0009651	Response to salt stress	4	24	16.6667	0.96	0.0445	9606.ENSP00000285930,9606.ENSP00000335153,9606.ENSP00000360609,9606.ENSP00000375978	AKR1B1,HSP90AA1,HSP90AB1,XRCC5
GO:0006749	Glutathione metabolic process	10	61	16.3934	0.95	6.01e-05	9606.ENSP00000270142,9606.ENSP00000331901,9606.ENSP00000340278,9606.ENSP00000354357,9606.ENSP00000358460,9606.ENSP00000362463,9606.ENSP00000364935,9606.ENSP00000377192,9606.ENSP00000380514,9606.ENSP00000419378	SOD1,EEF1G,PARK7,GSTM3,CLIC2,GLO1,CLIC1,G6PD,HAGH,CLIC3
GO:0030865	Cortical cytoskeleton organization	10	62	16.129	0.94	6.52e-05	9606.ENSP00000316029,9606.ENSP00000320866,9606.ENSP00000323856,9606.ENSP00000338934,9606.ENSP00000354251,9606.ENSP00000357110,9606.ENSP00000381581,9606.ENSP00000400175,9606.ENSP00000411825,9606.ENSP00000427687	TLN1,CALR,PLEC,EZR,NCKAP1,EPB41L2,LCP1,RHOA,PDCD6IP,WDR1
GO:0030834	Regulation of actin filament depolymerization	9	57	15.7895	0.94	0.00021	9606.ENSP00000246069,9606.ENSP00000264758,9606.ENSP00000349259,9606.ENSP00000354947,9606.ENSP00000376800,9606.ENSP00000427687,9606.ENSP00000487444,9606.ENSP00000495214,9606.ENSP00000495909	DSTN,ADD1,SPTBN1,CAPZA2,MTPN,WDR1,SPTAN1,SPTA1,SPTB
GO:0051693	Actin filament capping	6	38	15.7895	0.94	0.0057	9606.ENSP00000264758,9606.ENSP00000349259,9606.ENSP00000354947,9606.ENSP00000487444,9606.ENSP00000495214,9606.ENSP00000495909	ADD1,SPTBN1,CAPZA2,SPTAN1,SPTA1,SPTB
GO:0006541	Glutamine metabolic process	4	25	16	0.94	0.0498	9606.ENSP00000277865,9606.ENSP00000313490,9606.ENSP00000377696,9606.ENSP00000493382	GLUD1,PFAS,NIT2,PHGDH
GO:0042026	Protein refolding	4	25	16	0.94	0.0498	9606.ENSP00000335153,9606.ENSP00000340019,9606.ENSP00000364802,9606.ENSP00000437125	HSP90AA1,HSPD1,HSPA1A,HSPA8
GO:0030193	Regulation of blood coagulation	11	70	15.7143	0.93	2.79e-05	9606.ENSP00000205948,9606.ENSP00000253496,9606.ENSP00000264690,9606.ENSP00000306099,9606.ENSP00000308541,9606.ENSP00000321853,9606.ENSP00000336829,9606.ENSP00000339191,9606.ENSP00000346032,9606.ENSP00000369677,9606.ENSP00000498441	APOH,F12,KLKB1,FGB,F2,SERPINF2,FGG,CAV1,ANXA2,EMILIN1,FGA
GO:0051972	Regulation of telomerase activity	8	51	15.6863	0.93	0.00065	9606.ENSP00000215832,9606.ENSP00000268058,9606.ENSP00000313199,9606.ENSP00000335153,9606.ENSP00000360609,9606.ENSP00000375978,9606.ENSP00000377958,9606.ENSP00000482075	MAPK1,PML,HNRNPD,HSP90AA1,HSP90AB1,XRCC5,CCT4,PTGES3
GO:0045907	Positive regulation of vasoconstriction	5	32	15.625	0.93	0.0179	9606.ENSP00000306099,9606.ENSP00000336829,9606.ENSP00000339191,9606.ENSP00000400175,9606.ENSP00000498441	FGB,FGG,CAV1,RHOA,FGA
GO:1990748	Cellular detoxification	16	106	15.0943	0.92	2.7e-07	9606.ENSP00000225275,9606.ENSP00000225371,9606.ENSP00000241052,9606.ENSP00000265132,9606.ENSP00000270142,9606.ENSP00000295897,9606.ENSP00000298510,9606.ENSP00000340278,9606.ENSP00000342026,9606.ENSP00000348170,9606.ENSP00000354357,9606.ENSP00000356864,9606.ENSP00000358460,9606.ENSP00000363641,9606.ENSP00000367992,9606.ENSP00000494175	MPO,EPX,CAT,AMBP,SOD1,ALB,PRDX3,PARK7,PRDX6,HP,GSTM3,MGST3,CLIC2,TXN,ESD,HBB
GO:0098869	Cellular oxidant detoxification	14	91	15.3846	0.92	1.61e-06	9606.ENSP00000225275,9606.ENSP00000225371,9606.ENSP00000241052,9606.ENSP00000265132,9606.ENSP00000270142,9606.ENSP00000295897,9606.ENSP00000298510,9606.ENSP00000340278,9606.ENSP00000342026,9606.ENSP00000348170,9606.ENSP00000356864,9606.ENSP00000358460,9606.ENSP00000363641,9606.ENSP00000494175	MPO,EPX,CAT,AMBP,SOD1,ALB,PRDX3,PARK7,PRDX6,HP,MGST3,CLIC2,TXN,HBB
GO:0007339	Binding of sperm to zona pellucida	6	39	15.3846	0.92	0.0064	9606.ENSP00000258091,9606.ENSP00000280326,9606.ENSP00000295688,9606.ENSP00000361635,9606.ENSP00000377958,9606.ENSP00000496166	CCT7,CCT5,CCT3,VDAC2,CCT4,ALDOA
GO:0046825	Regulation of protein export from nucleus	5	33	15.1515	0.92	0.02	9606.ENSP00000340278,9606.ENSP00000340989,9606.ENSP00000358081,9606.ENSP00000363641,9606.ENSP00000384863	PARK7,SFN,BAG3,TXN,XPO1
GO:0030168	Platelet activation	14	97	14.433	0.9	2.71e-06	9606.ENSP00000216181,9606.ENSP00000279227,9606.ENSP00000296411,9606.ENSP00000306099,9606.ENSP00000308541,9606.ENSP00000316029,9606.ENSP00000319096,9606.ENSP00000336829,9606.ENSP00000358866,9606.ENSP00000364935,9606.ENSP00000419425,9606.ENSP00000458162,9606.ENSP00000494175,9606.ENSP00000498441	MYH9,FERMT3,METAP1,FGB,F2,TLN1,RAP2B,FGG,FLNA,CLIC1,PPIA,ACTG1,HBB,FGA
GO:0061045	Negative regulation of wound healing	10	69	14.4928	0.9	0.00013	9606.ENSP00000205948,9606.ENSP00000253496,9606.ENSP00000264690,9606.ENSP00000306099,9606.ENSP00000308541,9606.ENSP00000321853,9606.ENSP00000336829,9606.ENSP00000346032,9606.ENSP00000484472,9606.ENSP00000498441	APOH,F12,KLKB1,FGB,F2,SERPINF2,FGG,ANXA2,EPPK1,FGA
GO:0006081	Cellular aldehyde metabolic process	9	62	14.5161	0.9	0.00035	9606.ENSP00000261733,9606.ENSP00000313432,9606.ENSP00000321259,9606.ENSP00000340278,9606.ENSP00000346827,9606.ENSP00000362463,9606.ENSP00000367992,9606.ENSP00000370254,9606.ENSP00000380514	ALDH2,GRHPR,TALDO1,PARK7,ALDH9A1,GLO1,ESD,AKR1C1,HAGH
GO:0006953	Acute-phase response	6	42	14.2857	0.89	0.0087	9606.ENSP00000259396,9606.ENSP00000273784,9606.ENSP00000308541,9606.ENSP00000321853,9606.ENSP00000323929,9606.ENSP00000348170	ORM1,AHSG,F2,SERPINF2,A2M,HP
GO:0002181	Cytoplasmic translation	17	123	13.8211	0.88	2.7e-07	9606.ENSP00000248342,9606.ENSP00000253039,9606.ENSP00000270625,9606.ENSP00000278572,9606.ENSP00000311430,9606.ENSP00000341885,9606.ENSP00000346015,9606.ENSP00000346088,9606.ENSP00000354739,9606.ENSP00000359345,9606.ENSP00000362744,9606.ENSP00000379506,9606.ENSP00000389351,9606.ENSP00000416255,9606.ENSP00000426909,9606.ENSP00000428085,9606.ENSP00000472985	EIF3K,EIF2S3,RPS11,RPS3,RPL4,RPS2,RPL27A,RPL22,RPL12,RPL5,RPS4X,RPL14,RPSA,EIF4G1,RACK1,RPL30,RPS5
GO:0006739	NADP metabolic process	5	36	13.8889	0.88	0.0268	9606.ENSP00000252603,9606.ENSP00000303356,9606.ENSP00000321259,9606.ENSP00000352401,9606.ENSP00000377192	PGLS,DCXR,TALDO1,RPE,G6PD
GO:0009132	Nucleoside diphosphate metabolic process	13	96	13.5417	0.87	1.28e-05	9606.ENSP00000269848,9606.ENSP00000320171,9606.ENSP00000358547,9606.ENSP00000359991,9606.ENSP00000360124,9606.ENSP00000362413,9606.ENSP00000376886,9606.ENSP00000380070,9606.ENSP00000388183,9606.ENSP00000405573,9606.ENSP00000437402,9606.ENSP00000495530,9606.ENSP00000496166	PFKL,PKM,MPP1,PGAM1,PGM1,PGK1,NME2,GAPDH,OGDH,GPI,ENO2,ENO1,ALDOA
GO:0051017	Actin filament bundle assembly	8	59	13.5593	0.87	0.0015	9606.ENSP00000264758,9606.ENSP00000324422,9606.ENSP00000338934,9606.ENSP00000348163,9606.ENSP00000360305,9606.ENSP00000377941,9606.ENSP00000381581,9606.ENSP00000400175	ADD1,ZYX,EZR,PLS3,PDLIM1,ACTN1,LCP1,RHOA
GO:0046364	Monosaccharide biosynthetic process	7	51	13.7255	0.87	0.0038	9606.ENSP00000285930,9606.ENSP00000327070,9606.ENSP00000360124,9606.ENSP00000362413,9606.ENSP00000377192,9606.ENSP00000405573,9606.ENSP00000437402	AKR1B1,MDH2,PGM1,PGK1,G6PD,GPI,ENO2
GO:0090303	Positive regulation of wound healing	8	60	13.3333	0.86	0.0016	9606.ENSP00000205948,9606.ENSP00000253496,9606.ENSP00000308541,9606.ENSP00000321853,9606.ENSP00000366109,9606.ENSP00000369677,9606.ENSP00000379350,9606.ENSP00000458162	APOH,F12,F2,SERPINF2,ANXA1,EMILIN1,ITGB1,ACTG1
GO:0032506	Cytokinetic process	5	38	13.1579	0.86	0.0321	9606.ENSP00000216181,9606.ENSP00000323856,9606.ENSP00000398610,9606.ENSP00000400175,9606.ENSP00000411825	MYH9,PLEC,ANXA11,RHOA,PDCD6IP
GO:0002920	Regulation of humoral immune response	6	46	13.0435	0.85	0.013	9606.ENSP00000225698,9606.ENSP00000245907,9606.ENSP00000265983,9606.ENSP00000323929,9606.ENSP00000356399,9606.ENSP00000498879	C1QBP,C3,HPX,A2M,CFH,CD59
GO:0061077	Chaperone-mediated protein folding	9	71	12.6761	0.84	0.00083	9606.ENSP00000258091,9606.ENSP00000280326,9606.ENSP00000295688,9606.ENSP00000357051,9606.ENSP00000364802,9606.ENSP00000377958,9606.ENSP00000379042,9606.ENSP00000437125,9606.ENSP00000482075	CCT7,CCT5,CCT3,PEX19,HSPA1A,CCT4,ERO1A,HSPA8,PTGES3
GO:0032210	Regulation of telomere maintenance via telomerase	7	55	12.7273	0.84	0.0055	9606.ENSP00000215832,9606.ENSP00000258091,9606.ENSP00000268058,9606.ENSP00000280326,9606.ENSP00000295688,9606.ENSP00000375978,9606.ENSP00000377958	MAPK1,CCT7,PML,CCT5,CCT3,XRCC5,CCT4
GO:0006414	Translational elongation	6	47	12.766	0.84	0.0142	9606.ENSP00000307940,9606.ENSP00000331901,9606.ENSP00000339063,9606.ENSP00000376055,9606.ENSP00000410059,9606.ENSP00000426909	EEF2,EEF1G,EEF1A1,EEF1B2,EEF1D,RACK1
GO:0019319	Hexose biosynthetic process	6	47	12.766	0.84	0.0142	9606.ENSP00000285930,9606.ENSP00000327070,9606.ENSP00000360124,9606.ENSP00000362413,9606.ENSP00000405573,9606.ENSP00000437402	AKR1B1,MDH2,PGM1,PGK1,GPI,ENO2
GO:0021762	Substantia nigra development	6	47	12.766	0.84	0.0142	9606.ENSP00000277865,9606.ENSP00000299198,9606.ENSP00000371267,9606.ENSP00000377192,9606.ENSP00000400175,9606.ENSP00000466818	GLUD1,CKB,YWHAQ,G6PD,RHOA,COX6B1
GO:0090114	COPII-coated vesicle budding	5	39	12.8205	0.84	0.0349	9606.ENSP00000338844,9606.ENSP00000345656,9606.ENSP00000362807,9606.ENSP00000373312,9606.ENSP00000378721	SEC23B,VAPA,PEF1,SEC13,SEC31A
GO:1903036	Positive regulation of response to wounding	9	72	12.5	0.83	0.00091	9606.ENSP00000205948,9606.ENSP00000253496,9606.ENSP00000308541,9606.ENSP00000321853,9606.ENSP00000358866,9606.ENSP00000366109,9606.ENSP00000369677,9606.ENSP00000379350,9606.ENSP00000458162	APOH,F12,F2,SERPINF2,FLNA,ANXA1,EMILIN1,ITGB1,ACTG1
GO:2000573	Positive regulation of DNA biosynthetic process	9	73	12.3288	0.83	0.001	9606.ENSP00000215832,9606.ENSP00000258091,9606.ENSP00000280326,9606.ENSP00000295688,9606.ENSP00000335153,9606.ENSP00000360609,9606.ENSP00000375978,9606.ENSP00000377958,9606.ENSP00000482075	MAPK1,CCT7,CCT5,CCT3,HSP90AA1,HSP90AB1,XRCC5,CCT4,PTGES3
GO:0006458	De novo protein folding	5	40	12.5	0.83	0.038	9606.ENSP00000340019,9606.ENSP00000364802,9606.ENSP00000379042,9606.ENSP00000437125,9606.ENSP00000482075	HSPD1,HSPA1A,ERO1A,HSPA8,PTGES3
GO:0031032	Actomyosin structure organization	14	115	12.1739	0.82	1.33e-05	9606.ENSP00000216181,9606.ENSP00000252456,9606.ENSP00000323856,9606.ENSP00000324422,9606.ENSP00000357110,9606.ENSP00000359225,9606.ENSP00000360305,9606.ENSP00000379350,9606.ENSP00000379616,9606.ENSP00000400175,9606.ENSP00000411825,9606.ENSP00000427687,9606.ENSP00000456436,9606.ENSP00000458162	MYH9,CNN1,PLEC,ZYX,EPB41L2,CNN3,PDLIM1,ITGB1,MYH11,RHOA,PDCD6IP,WDR1,CNN2,ACTG1
GO:0010769	Regulation of cell morphogenesis involved in differentiation	12	99	12.1212	0.82	7.38e-05	9606.ENSP00000225698,9606.ENSP00000252699,9606.ENSP00000261263,9606.ENSP00000306099,9606.ENSP00000320866,9606.ENSP00000336829,9606.ENSP00000337598,9606.ENSP00000346300,9606.ENSP00000358866,9606.ENSP00000360269,9606.ENSP00000373905,9606.ENSP00000498441	C1QBP,ACTN4,RAB21,FGB,CALR,FGG,LIMS1,CRKL,FLNA,TACSTD2,DNM2,FGA
GO:1900182	Positive regulation of protein localization to nucleus	11	91	12.0879	0.82	0.00018	9606.ENSP00000258091,9606.ENSP00000261574,9606.ENSP00000280326,9606.ENSP00000295688,9606.ENSP00000308541,9606.ENSP00000335153,9606.ENSP00000340278,9606.ENSP00000358081,9606.ENSP00000358866,9606.ENSP00000360609,9606.ENSP00000377958	CCT7,IPO5,CCT5,CCT3,F2,HSP90AA1,PARK7,BAG3,FLNA,HSP90AB1,CCT4
GO:0010770	Positive regulation of cell morphogenesis involved in differentiation	10	82	12.1951	0.82	0.00043	9606.ENSP00000225698,9606.ENSP00000261263,9606.ENSP00000306099,9606.ENSP00000320866,9606.ENSP00000336829,9606.ENSP00000337598,9606.ENSP00000346300,9606.ENSP00000358866,9606.ENSP00000373905,9606.ENSP00000498441	C1QBP,RAB21,FGB,CALR,FGG,LIMS1,CRKL,FLNA,DNM2,FGA
GO:0008637	Apoptotic mitochondrial changes	7	58	12.069	0.82	0.007	9606.ENSP00000223136,9606.ENSP00000285093,9606.ENSP00000299138,9606.ENSP00000340019,9606.ENSP00000340989,9606.ENSP00000361635,9606.ENSP00000449089	FIS1,ACAA2,VPS35,HSPD1,SFN,VDAC2,DNM1L
GO:0045454	Cell redox homeostasis	5	41	12.1951	0.82	0.0414	9606.ENSP00000216714,9606.ENSP00000298510,9606.ENSP00000342026,9606.ENSP00000363641,9606.ENSP00000379042	APEX1,PRDX3,PRDX6,TXN,ERO1A
GO:0032206	Positive regulation of telomere maintenance	8	67	11.9403	0.81	0.003	9606.ENSP00000215832,9606.ENSP00000258091,9606.ENSP00000268058,9606.ENSP00000280326,9606.ENSP00000295688,9606.ENSP00000313199,9606.ENSP00000375978,9606.ENSP00000377958	MAPK1,CCT7,PML,CCT5,CCT3,HNRNPD,XRCC5,CCT4
GO:0042307	Positive regulation of protein import into nucleus	5	42	11.9048	0.81	0.0447	9606.ENSP00000261574,9606.ENSP00000335153,9606.ENSP00000358081,9606.ENSP00000358866,9606.ENSP00000360609	IPO5,HSP90AA1,BAG3,FLNA,HSP90AB1
GO:1901998	Toxin transport	5	42	11.9048	0.81	0.0447	9606.ENSP00000258091,9606.ENSP00000280326,9606.ENSP00000295688,9606.ENSP00000329419,9606.ENSP00000377958	CCT7,CCT5,CCT3,COPB2,CCT4
GO:0061041	Regulation of wound healing	15	130	11.5385	0.8	1e-05	9606.ENSP00000205948,9606.ENSP00000253496,9606.ENSP00000264690,9606.ENSP00000306099,9606.ENSP00000308541,9606.ENSP00000321853,9606.ENSP00000336829,9606.ENSP00000339191,9606.ENSP00000346032,9606.ENSP00000366109,9606.ENSP00000369677,9606.ENSP00000379350,9606.ENSP00000458162,9606.ENSP00000484472,9606.ENSP00000498441	APOH,F12,KLKB1,FGB,F2,SERPINF2,FGG,CAV1,ANXA2,ANXA1,EMILIN1,ITGB1,ACTG1,EPPK1,FGA
GO:0070613	Regulation of protein processing	8	69	11.5942	0.8	0.0036	9606.ENSP00000216181,9606.ENSP00000253496,9606.ENSP00000264690,9606.ENSP00000321853,9606.ENSP00000346032,9606.ENSP00000460236,9606.ENSP00000481314,9606.ENSP00000495530	MYH9,F12,KLKB1,SERPINF2,ANXA2,SPON1,SNX12,ENO1
GO:0048002	Antigen processing and presentation of peptide antigen	7	60	11.6667	0.8	0.0083	9606.ENSP00000236671,9606.ENSP00000300289,9606.ENSP00000320866,9606.ENSP00000353099,9606.ENSP00000365402,9606.ENSP00000373905,9606.ENSP00000384886	CTSD,PDIA3,CALR,HLA-DRB1,HLA-C,DNM2,IFI30
GO:2001244	Positive regulation of intrinsic apoptotic signaling pathway	7	61	11.4754	0.8	0.0089	9606.ENSP00000223136,9606.ENSP00000270142,9606.ENSP00000278572,9606.ENSP00000339191,9606.ENSP00000340278,9606.ENSP00000426909,9606.ENSP00000449089	FIS1,SOD1,RPS3,CAV1,PARK7,RACK1,DNM1L
GO:0007599	Hemostasis	20	178	11.236	0.79	2.7e-07	9606.ENSP00000205948,9606.ENSP00000216181,9606.ENSP00000253496,9606.ENSP00000262418,9606.ENSP00000264690,9606.ENSP00000279227,9606.ENSP00000296411,9606.ENSP00000306099,9606.ENSP00000308541,9606.ENSP00000316029,9606.ENSP00000319096,9606.ENSP00000336829,9606.ENSP00000358866,9606.ENSP00000364935,9606.ENSP00000405573,9606.ENSP00000419425,9606.ENSP00000458162,9606.ENSP00000494175,9606.ENSP00000498441,…	APOH,MYH9,F12,SLC4A1,KLKB1,FERMT3,METAP1,FGB,F2,TLN1,RAP2B,FGG,FLNA,CLIC1,GPI,PPIA,ACTG1,HBB,FGA,CD59
GO:0006006	Glucose metabolic process	13	116	11.2069	0.79	6.38e-05	9606.ENSP00000269848,9606.ENSP00000297258,9606.ENSP00000303356,9606.ENSP00000320171,9606.ENSP00000325527,9606.ENSP00000327070,9606.ENSP00000360124,9606.ENSP00000362413,9606.ENSP00000377192,9606.ENSP00000380070,9606.ENSP00000405573,9606.ENSP00000437402,9606.ENSP00000495530	PFKL,FABP5,DCXR,PKM,FBN1,MDH2,PGM1,PGK1,G6PD,GAPDH,GPI,ENO2,ENO1
GO:0002526	Acute inflammatory response	9	80	11.25	0.79	0.0017	9606.ENSP00000253496,9606.ENSP00000259396,9606.ENSP00000264690,9606.ENSP00000273784,9606.ENSP00000308541,9606.ENSP00000321853,9606.ENSP00000323929,9606.ENSP00000348170,9606.ENSP00000356969	F12,ORM1,KLKB1,AHSG,F2,SERPINF2,A2M,HP,APOA2
GO:0030837	Negative regulation of actin filament polymerization	7	62	11.2903	0.79	0.0097	9606.ENSP00000225655,9606.ENSP00000264758,9606.ENSP00000349259,9606.ENSP00000354947,9606.ENSP00000487444,9606.ENSP00000495214,9606.ENSP00000495909	PFN1,ADD1,SPTBN1,CAPZA2,SPTAN1,SPTA1,SPTB
GO:0006826	Iron ion transport	6	53	11.3208	0.79	0.0224	9606.ENSP00000231751,9606.ENSP00000264613,9606.ENSP00000265983,9606.ENSP00000373905,9606.ENSP00000385834,9606.ENSP00000479606	LTF,CP,HPX,DNM2,TF,CLTC
GO:0007596	Blood coagulation	19	173	10.9827	0.78	6.7e-07	9606.ENSP00000205948,9606.ENSP00000216181,9606.ENSP00000253496,9606.ENSP00000262418,9606.ENSP00000264690,9606.ENSP00000279227,9606.ENSP00000296411,9606.ENSP00000306099,9606.ENSP00000308541,9606.ENSP00000316029,9606.ENSP00000319096,9606.ENSP00000336829,9606.ENSP00000358866,9606.ENSP00000364935,9606.ENSP00000419425,9606.ENSP00000458162,9606.ENSP00000494175,9606.ENSP00000498441,9606.ENSP00000498879	APOH,MYH9,F12,SLC4A1,KLKB1,FERMT3,METAP1,FGB,F2,TLN1,RAP2B,FGG,FLNA,CLIC1,PPIA,ACTG1,HBB,FGA,CD59
GO:0050821	Protein stabilization	23	215	10.6977	0.77	5.07e-08	9606.ENSP00000225655,9606.ENSP00000247970,9606.ENSP00000258091,9606.ENSP00000261263,9606.ENSP00000268058,9606.ENSP00000280326,9606.ENSP00000295688,9606.ENSP00000320866,9606.ENSP00000333298,9606.ENSP00000335153,9606.ENSP00000340019,9606.ENSP00000340278,9606.ENSP00000356969,9606.ENSP00000357051,9606.ENSP00000358081,9606.ENSP00000358866,9606.ENSP00000359345,9606.ENSP00000360609,9606.ENSP00000364802,…	PFN1,PIN1,CCT7,RAB21,PML,CCT5,CCT3,CALR,LAMP1,HSP90AA1,HSPD1,PARK7,APOA2,PEX19,BAG3,FLNA,RPL5,HSP90AB1,HSPA1A,CCT4,GAPDH,IFI30,PTGES3
GO:0035088	Establishment or maintenance of apical/basal cell polarity	6	56	10.7143	0.77	0.0281	9606.ENSP00000265709,9606.ENSP00000338934,9606.ENSP00000363500,9606.ENSP00000400175,9606.ENSP00000411825,9606.ENSP00000427687	ANK1,EZR,CLIC4,RHOA,PDCD6IP,WDR1
GO:0016052	Carbohydrate catabolic process	12	113	10.6195	0.76	0.00021	9606.ENSP00000269848,9606.ENSP00000320171,9606.ENSP00000359664,9606.ENSP00000359991,9606.ENSP00000360124,9606.ENSP00000362413,9606.ENSP00000380070,9606.ENSP00000388183,9606.ENSP00000405573,9606.ENSP00000437402,9606.ENSP00000495530,9606.ENSP00000496166	PFKL,PKM,CTBS,PGAM1,PGM1,PGK1,GAPDH,OGDH,GPI,ENO2,ENO1,ALDOA
GO:0050764	Regulation of phagocytosis	11	104	10.5769	0.76	0.00049	9606.ENSP00000245907,9606.ENSP00000270142,9606.ENSP00000273784,9606.ENSP00000303366,9606.ENSP00000320866,9606.ENSP00000345347,9606.ENSP00000356969,9606.ENSP00000373905,9606.ENSP00000416561,9606.ENSP00000426909,9606.ENSP00000456436	C3,SOD1,AHSG,LMAN2,CALR,HMGB1,APOA2,DNM2,CFB,RACK1,CNN2
GO:0050766	Positive regulation of phagocytosis	8	75	10.6667	0.76	0.0056	9606.ENSP00000245907,9606.ENSP00000270142,9606.ENSP00000273784,9606.ENSP00000303366,9606.ENSP00000320866,9606.ENSP00000356969,9606.ENSP00000373905,9606.ENSP00000416561	C3,SOD1,AHSG,LMAN2,CALR,APOA2,DNM2,CFB
GO:1903051	Negative regulation of proteolysis involved in protein catabolic process	7	67	10.4478	0.76	0.0142	9606.ENSP00000221566,9606.ENSP00000268058,9606.ENSP00000340278,9606.ENSP00000359345,9606.ENSP00000360609,9606.ENSP00000386284,9606.ENSP00000477530	SGTA,PML,PARK7,RPL5,HSP90AB1,ALAD,F8A3
GO:0006888	Endoplasmic reticulum to Golgi vesicle-mediated transport	13	126	10.3175	0.75	0.00012	9606.ENSP00000265709,9606.ENSP00000303366,9606.ENSP00000325002,9606.ENSP00000329419,9606.ENSP00000330945,9606.ENSP00000338844,9606.ENSP00000345656,9606.ENSP00000357048,9606.ENSP00000362807,9606.ENSP00000373312,9606.ENSP00000378721,9606.ENSP00000405926,9606.ENSP00000469035	ANK1,LMAN2,COPG1,COPB2,TMED9,SEC23B,VAPA,COPA,PEF1,SEC13,SEC31A,TMED7,COPE
GO:0032272	Negative regulation of protein polymerization	8	77	10.3896	0.75	0.0064	9606.ENSP00000225655,9606.ENSP00000264758,9606.ENSP00000349259,9606.ENSP00000354947,9606.ENSP00000361635,9606.ENSP00000487444,9606.ENSP00000495214,9606.ENSP00000495909	PFN1,ADD1,SPTBN1,CAPZA2,VDAC2,SPTAN1,SPTA1,SPTB
GO:0032092	Positive regulation of protein binding	9	89	10.1124	0.74	0.0034	9606.ENSP00000247970,9606.ENSP00000264758,9606.ENSP00000339191,9606.ENSP00000346032,9606.ENSP00000360609,9606.ENSP00000418447,9606.ENSP00000460236,9606.ENSP00000495214,9606.ENSP00000498596	PIN1,ADD1,CAV1,ANXA2,HSP90AB1,PPP2CA,SPON1,SPTA1,STING1
GO:2000379	Positive regulation of reactive oxygen species metabolic process	7	69	10.1449	0.74	0.0161	9606.ENSP00000270142,9606.ENSP00000303356,9606.ENSP00000308541,9606.ENSP00000312999,9606.ENSP00000340278,9606.ENSP00000370254,9606.ENSP00000376345	SOD1,DCXR,F2,GNAI2,PARK7,AKR1C1,GRB2
GO:0031532	Actin cytoskeleton reorganization	7	70	10	0.74	0.0172	9606.ENSP00000216181,9606.ENSP00000323856,9606.ENSP00000338934,9606.ENSP00000358866,9606.ENSP00000366109,9606.ENSP00000376345,9606.ENSP00000400175	MYH9,PLEC,EZR,FLNA,ANXA1,GRB2,RHOA
GO:0031623	Receptor internalization	7	70	10	0.74	0.0172	9606.ENSP00000338934,9606.ENSP00000339191,9606.ENSP00000373905,9606.ENSP00000376345,9606.ENSP00000379350,9606.ENSP00000479606,9606.ENSP00000483185	EZR,CAV1,DNM2,GRB2,ITGB1,CLTC,AP2B1
GO:0006956	Complement activation	6	60	10	0.74	0.0367	9606.ENSP00000225698,9606.ENSP00000245907,9606.ENSP00000263408,9606.ENSP00000356399,9606.ENSP00000416561,9606.ENSP00000444271	C1QBP,C3,C9,CFH,CFB,C1R
GO:1903034	Regulation of response to wounding	16	162	9.87654	0.73	2.01e-05	9606.ENSP00000205948,9606.ENSP00000253496,9606.ENSP00000264690,9606.ENSP00000306099,9606.ENSP00000308541,9606.ENSP00000321853,9606.ENSP00000336829,9606.ENSP00000339191,9606.ENSP00000346032,9606.ENSP00000358866,9606.ENSP00000366109,9606.ENSP00000369677,9606.ENSP00000379350,9606.ENSP00000458162,9606.ENSP00000484472,9606.ENSP00000498441	APOH,F12,KLKB1,FGB,F2,SERPINF2,FGG,CAV1,ANXA2,FLNA,ANXA1,EMILIN1,ITGB1,ACTG1,EPPK1,FGA
GO:0032387	Negative regulation of intracellular transport	6	61	9.83607	0.73	0.0393	9606.ENSP00000299138,9606.ENSP00000340278,9606.ENSP00000358081,9606.ENSP00000363641,9606.ENSP00000394071,9606.ENSP00000481314	VPS35,PARK7,BAG3,TXN,GDI1,SNX12
GO:0019318	Hexose metabolic process	15	159	9.43396	0.71	6.52e-05	9606.ENSP00000269848,9606.ENSP00000285930,9606.ENSP00000297258,9606.ENSP00000303356,9606.ENSP00000320171,9606.ENSP00000325527,9606.ENSP00000327070,9606.ENSP00000360124,9606.ENSP00000362413,9606.ENSP00000377192,9606.ENSP00000380070,9606.ENSP00000405573,9606.ENSP00000437402,9606.ENSP00000495530,9606.ENSP00000496166	PFKL,AKR1B1,FABP5,DCXR,PKM,FBN1,MDH2,PGM1,PGK1,G6PD,GAPDH,GPI,ENO2,ENO1,ALDOA
GO:0008064	Regulation of actin polymerization or depolymerization	15	161	9.31677	0.71	7.15e-05	9606.ENSP00000219150,9606.ENSP00000225655,9606.ENSP00000246069,9606.ENSP00000264758,9606.ENSP00000349259,9606.ENSP00000354251,9606.ENSP00000354947,9606.ENSP00000376345,9606.ENSP00000376800,9606.ENSP00000389631,9606.ENSP00000400175,9606.ENSP00000427687,9606.ENSP00000487444,9606.ENSP00000495214,9606.ENSP00000495909	CORO1A,PFN1,DSTN,ADD1,SPTBN1,NCKAP1,CAPZA2,GRB2,MTPN,ARPC1B,RHOA,WDR1,SPTAN1,SPTA1,SPTB
GO:0051592	Response to calcium ion	14	149	9.39597	0.71	0.00013	9606.ENSP00000264758,9606.ENSP00000268182,9606.ENSP00000297991,9606.ENSP00000306099,9606.ENSP00000313199,9606.ENSP00000336829,9606.ENSP00000339191,9606.ENSP00000362807,9606.ENSP00000363500,9606.ENSP00000378721,9606.ENSP00000394071,9606.ENSP00000398610,9606.ENSP00000458162,9606.ENSP00000498441	ADD1,IQGAP1,AQP3,FGB,HNRNPD,FGG,CAV1,PEF1,CLIC4,SEC31A,GDI1,ANXA11,ACTG1,FGA
GO:0034614	Cellular response to reactive oxygen species	11	118	9.32203	0.71	0.0013	9606.ENSP00000215832,9606.ENSP00000216714,9606.ENSP00000225275,9606.ENSP00000241052,9606.ENSP00000265132,9606.ENSP00000267257,9606.ENSP00000270142,9606.ENSP00000278572,9606.ENSP00000298510,9606.ENSP00000340278,9606.ENSP00000366109	MAPK1,APEX1,MPO,CAT,AMBP,PXN,SOD1,RPS3,PRDX3,PARK7,ANXA1
GO:0006900	Vesicle budding from membrane	7	75	9.33333	0.71	0.0233	9606.ENSP00000330945,9606.ENSP00000338844,9606.ENSP00000345656,9606.ENSP00000346032,9606.ENSP00000362807,9606.ENSP00000373312,9606.ENSP00000378721	TMED9,SEC23B,VAPA,ANXA2,PEF1,SEC13,SEC31A
GO:0019731	Antibacterial humoral response	6	64	9.375	0.71	0.0473	9606.ENSP00000231751,9606.ENSP00000306099,9606.ENSP00000328359,9606.ENSP00000385834,9606.ENSP00000440066,9606.ENSP00000498441	LTF,FGB,DEFA3,TF,JCHAIN,FGA
GO:0046824	Positive regulation of nucleocytoplasmic transport	6	64	9.375	0.71	0.0473	9606.ENSP00000261574,9606.ENSP00000335153,9606.ENSP00000340989,9606.ENSP00000358081,9606.ENSP00000358866,9606.ENSP00000360609	IPO5,HSP90AA1,SFN,BAG3,FLNA,HSP90AB1
GO:0030833	Regulation of actin filament polymerization	13	142	9.15493	0.7	0.00035	9606.ENSP00000219150,9606.ENSP00000225655,9606.ENSP00000264758,9606.ENSP00000349259,9606.ENSP00000354251,9606.ENSP00000354947,9606.ENSP00000376345,9606.ENSP00000376800,9606.ENSP00000389631,9606.ENSP00000400175,9606.ENSP00000487444,9606.ENSP00000495214,9606.ENSP00000495909	CORO1A,PFN1,ADD1,SPTBN1,NCKAP1,CAPZA2,GRB2,MTPN,ARPC1B,RHOA,SPTAN1,SPTA1,SPTB
GO:1900180	Regulation of protein localization to nucleus	13	143	9.09091	0.7	0.00036	9606.ENSP00000247970,9606.ENSP00000258091,9606.ENSP00000261574,9606.ENSP00000280326,9606.ENSP00000295688,9606.ENSP00000308541,9606.ENSP00000335153,9606.ENSP00000340278,9606.ENSP00000357283,9606.ENSP00000358081,9606.ENSP00000358866,9606.ENSP00000360609,9606.ENSP00000377958	PIN1,CCT7,IPO5,CCT5,CCT3,F2,HSP90AA1,PARK7,LMNA,BAG3,FLNA,HSP90AB1,CCT4
GO:0006575	Cellular modified amino acid metabolic process	16	178	8.98876	0.69	5.36e-05	9606.ENSP00000245206,9606.ENSP00000270142,9606.ENSP00000299198,9606.ENSP00000331901,9606.ENSP00000340278,9606.ENSP00000345672,9606.ENSP00000346827,9606.ENSP00000354357,9606.ENSP00000358460,9606.ENSP00000362463,9606.ENSP00000364935,9606.ENSP00000377192,9606.ENSP00000377284,9606.ENSP00000380514,9606.ENSP00000387654,9606.ENSP00000419378	GOT2,SOD1,CKB,EEF1G,PARK7,CTSB,ALDH9A1,GSTM3,CLIC2,GLO1,CLIC1,G6PD,FOLR1,HAGH,PCYOX1,CLIC3
GO:0042177	Negative regulation of protein catabolic process	10	112	8.92857	0.69	0.0036	9606.ENSP00000221566,9606.ENSP00000247970,9606.ENSP00000299138,9606.ENSP00000340278,9606.ENSP00000346032,9606.ENSP00000358866,9606.ENSP00000360609,9606.ENSP00000386284,9606.ENSP00000477530,9606.ENSP00000481314	SGTA,PIN1,VPS35,PARK7,ANXA2,FLNA,HSP90AB1,ALAD,F8A3,SNX12
GO:0009144	Purine nucleoside triphosphate metabolic process	17	193	8.80829	0.68	3.49e-05	9606.ENSP00000269848,9606.ENSP00000320171,9606.ENSP00000359991,9606.ENSP00000360124,9606.ENSP00000362413,9606.ENSP00000364802,9606.ENSP00000376886,9606.ENSP00000380070,9606.ENSP00000384330,9606.ENSP00000388183,9606.ENSP00000400175,9606.ENSP00000405573,9606.ENSP00000437125,9606.ENSP00000437402,9606.ENSP00000493536,9606.ENSP00000495530,9606.ENSP00000496166	PFKL,PKM,PGAM1,PGM1,PGK1,HSPA1A,NME2,GAPDH,MYH8,OGDH,RHOA,GPI,HSPA8,ENO2,SAMHD1,ENO1,ALDOA
GO:0007160	Cell-matrix adhesion	12	136	8.82353	0.68	0.00095	9606.ENSP00000267257,9606.ENSP00000270233,9606.ENSP00000279227,9606.ENSP00000306099,9606.ENSP00000324422,9606.ENSP00000336829,9606.ENSP00000369677,9606.ENSP00000377941,9606.ENSP00000379350,9606.ENSP00000398632,9606.ENSP00000400175,9606.ENSP00000498441	PXN,BCAM,FERMT3,FGB,ZYX,FGG,EMILIN1,ACTN1,ITGB1,CD44,RHOA,FGA
GO:2000278	Regulation of DNA biosynthetic process	11	124	8.87097	0.68	0.0018	9606.ENSP00000215832,9606.ENSP00000258091,9606.ENSP00000268058,9606.ENSP00000280326,9606.ENSP00000295688,9606.ENSP00000313199,9606.ENSP00000335153,9606.ENSP00000360609,9606.ENSP00000375978,9606.ENSP00000377958,9606.ENSP00000482075	MAPK1,CCT7,PML,CCT5,CCT3,HNRNPD,HSP90AA1,HSP90AB1,XRCC5,CCT4,PTGES3
GO:0032204	Regulation of telomere maintenance	9	103	8.73786	0.68	0.0081	9606.ENSP00000215832,9606.ENSP00000258091,9606.ENSP00000268058,9606.ENSP00000280326,9606.ENSP00000295688,9606.ENSP00000313199,9606.ENSP00000357283,9606.ENSP00000375978,9606.ENSP00000377958	MAPK1,CCT7,PML,CCT5,CCT3,HNRNPD,LMNA,XRCC5,CCT4
GO:0042542	Response to hydrogen peroxide	9	103	8.73786	0.68	0.0081	9606.ENSP00000216714,9606.ENSP00000241052,9606.ENSP00000270142,9606.ENSP00000278572,9606.ENSP00000298510,9606.ENSP00000340278,9606.ENSP00000348170,9606.ENSP00000366109,9606.ENSP00000494175	APEX1,CAT,SOD1,RPS3,PRDX3,PARK7,HP,ANXA1,HBB
GO:0043648	Dicarboxylic acid metabolic process	8	91	8.79121	0.68	0.0156	9606.ENSP00000245206,9606.ENSP00000277865,9606.ENSP00000313432,9606.ENSP00000327070,9606.ENSP00000377284,9606.ENSP00000377696,9606.ENSP00000378782,9606.ENSP00000388183	GOT2,GLUD1,GRHPR,MDH2,FOLR1,NIT2,QPRT,OGDH
GO:0031647	Regulation of protein stability	28	328	8.53659	0.67	5.34e-08	9606.ENSP00000215832,9606.ENSP00000225655,9606.ENSP00000247970,9606.ENSP00000258091,9606.ENSP00000261263,9606.ENSP00000268058,9606.ENSP00000280326,9606.ENSP00000295688,9606.ENSP00000299138,9606.ENSP00000320866,9606.ENSP00000333298,9606.ENSP00000335153,9606.ENSP00000340019,9606.ENSP00000340278,9606.ENSP00000356969,9606.ENSP00000357051,9606.ENSP00000357283,9606.ENSP00000358081,9606.ENSP00000358866,…	MAPK1,PFN1,PIN1,CCT7,RAB21,PML,CCT5,CCT3,VPS35,CALR,LAMP1,HSP90AA1,HSPD1,PARK7,APOA2,PEX19,LMNA,BAG3,FLNA,RPL5,HSP90AB1,HSPA1A,CCT4,GAPDH,IFI30,TF,HSPA8,PTGES3
GO:0009205	Purine ribonucleoside triphosphate metabolic process	16	188	8.51064	0.67	8.69e-05	9606.ENSP00000269848,9606.ENSP00000320171,9606.ENSP00000359991,9606.ENSP00000360124,9606.ENSP00000362413,9606.ENSP00000364802,9606.ENSP00000376886,9606.ENSP00000380070,9606.ENSP00000384330,9606.ENSP00000388183,9606.ENSP00000400175,9606.ENSP00000405573,9606.ENSP00000437125,9606.ENSP00000437402,9606.ENSP00000495530,9606.ENSP00000496166	PFKL,PKM,PGAM1,PGM1,PGK1,HSPA1A,NME2,GAPDH,MYH8,OGDH,RHOA,GPI,HSPA8,ENO2,ENO1,ALDOA
GO:0046034	ATP metabolic process	14	163	8.58896	0.67	0.00031	9606.ENSP00000269848,9606.ENSP00000320171,9606.ENSP00000359991,9606.ENSP00000360124,9606.ENSP00000362413,9606.ENSP00000364802,9606.ENSP00000380070,9606.ENSP00000384330,9606.ENSP00000388183,9606.ENSP00000405573,9606.ENSP00000437125,9606.ENSP00000437402,9606.ENSP00000495530,9606.ENSP00000496166	PFKL,PKM,PGAM1,PGM1,PGK1,HSPA1A,GAPDH,MYH8,OGDH,GPI,HSPA8,ENO2,ENO1,ALDOA
GO:0009636	Response to toxic substance	19	229	8.29694	0.66	1.84e-05	9606.ENSP00000225275,9606.ENSP00000225371,9606.ENSP00000241052,9606.ENSP00000265132,9606.ENSP00000270142,9606.ENSP00000295897,9606.ENSP00000298510,9606.ENSP00000340278,9606.ENSP00000342026,9606.ENSP00000348170,9606.ENSP00000354357,9606.ENSP00000356864,9606.ENSP00000358460,9606.ENSP00000363641,9606.ENSP00000367992,9606.ENSP00000386284,9606.ENSP00000411719,9606.ENSP00000480004,9606.ENSP00000494175	MPO,EPX,CAT,AMBP,SOD1,ALB,PRDX3,PARK7,PRDX6,HP,GSTM3,MGST3,CLIC2,TXN,ESD,ALAD,MPST,EPHX1,HBB
GO:0032271	Regulation of protein polymerization	17	204	8.33333	0.66	6.11e-05	9606.ENSP00000219150,9606.ENSP00000225655,9606.ENSP00000264758,9606.ENSP00000278572,9606.ENSP00000335153,9606.ENSP00000349259,9606.ENSP00000354251,9606.ENSP00000354947,9606.ENSP00000361635,9606.ENSP00000364802,9606.ENSP00000376345,9606.ENSP00000376800,9606.ENSP00000389631,9606.ENSP00000400175,9606.ENSP00000487444,9606.ENSP00000495214,9606.ENSP00000495909	CORO1A,PFN1,ADD1,RPS3,HSP90AA1,SPTBN1,NCKAP1,CAPZA2,VDAC2,HSPA1A,GRB2,MTPN,ARPC1B,RHOA,SPTAN1,SPTA1,SPTB
GO:0051099	Positive regulation of binding	15	181	8.28729	0.66	0.00021	9606.ENSP00000221419,9606.ENSP00000247970,9606.ENSP00000264758,9606.ENSP00000339191,9606.ENSP00000340278,9606.ENSP00000345347,9606.ENSP00000346032,9606.ENSP00000358460,9606.ENSP00000360609,9606.ENSP00000363641,9606.ENSP00000416255,9606.ENSP00000418447,9606.ENSP00000460236,9606.ENSP00000495214,9606.ENSP00000498596	HNRNPL,PIN1,ADD1,CAV1,PARK7,HMGB1,ANXA2,CLIC2,HSP90AB1,TXN,EIF4G1,PPP2CA,SPON1,SPTA1,STING1
GO:0006898	Receptor-mediated endocytosis	14	166	8.43373	0.66	0.00035	9606.ENSP00000309415,9606.ENSP00000338934,9606.ENSP00000339191,9606.ENSP00000353731,9606.ENSP00000361883,9606.ENSP00000363827,9606.ENSP00000373905,9606.ENSP00000376345,9606.ENSP00000377148,9606.ENSP00000377284,9606.ENSP00000379350,9606.ENSP00000385519,9606.ENSP00000479606,9606.ENSP00000483185	CLTB,EZR,CAV1,DPP4,CAP1,HSPG2,DNM2,GRB2,AP1G1,FOLR1,ITGB1,CD14,CLTC,AP2B1
GO:0051701	Biological process involved in interaction with host	13	157	8.28025	0.65	0.00081	9606.ENSP00000292609,9606.ENSP00000301764,9606.ENSP00000333298,9606.ENSP00000339191,9606.ENSP00000345656,9606.ENSP00000345672,9606.ENSP00000353731,9606.ENSP00000360609,9606.ENSP00000364802,9606.ENSP00000379350,9606.ENSP00000389351,9606.ENSP00000416269,9606.ENSP00000419425	PGLYRP2,DDB1,LAMP1,CAV1,VAPA,CTSB,DPP4,HSP90AB1,HSPA1A,ITGB1,RPSA,DDX39B,PPIA
GO:0050878	Regulation of body fluid levels	30	371	8.08625	0.64	4.16e-08	9606.ENSP00000205948,9606.ENSP00000216181,9606.ENSP00000253496,9606.ENSP00000262418,9606.ENSP00000264690,9606.ENSP00000279227,9606.ENSP00000285930,9606.ENSP00000296411,9606.ENSP00000297991,9606.ENSP00000306099,9606.ENSP00000308541,9606.ENSP00000312999,9606.ENSP00000316029,9606.ENSP00000319096,9606.ENSP00000321853,9606.ENSP00000323856,9606.ENSP00000336829,9606.ENSP00000339191,9606.ENSP00000340989,…	APOH,MYH9,F12,SLC4A1,KLKB1,FERMT3,AKR1B1,METAP1,AQP3,FGB,F2,GNAI2,TLN1,RAP2B,SERPINF2,PLEC,FGG,CAV1,SFN,ANXA2,COPA,FLNA,CLIC1,EMILIN1,GPI,PPIA,ACTG1,HBB,FGA,CD59
GO:0042060	Wound healing	27	336	8.03571	0.64	2.7e-07	9606.ENSP00000205948,9606.ENSP00000216181,9606.ENSP00000253496,9606.ENSP00000262418,9606.ENSP00000264690,9606.ENSP00000279227,9606.ENSP00000296411,9606.ENSP00000306099,9606.ENSP00000308541,9606.ENSP00000316029,9606.ENSP00000319096,9606.ENSP00000323856,9606.ENSP00000336829,9606.ENSP00000340510,9606.ENSP00000346550,9606.ENSP00000358866,9606.ENSP00000364935,9606.ENSP00000379350,9606.ENSP00000398632,…	APOH,MYH9,F12,SLC4A1,KLKB1,FERMT3,METAP1,FGB,F2,TLN1,RAP2B,PLEC,FGG,PPL,ANXA6,FLNA,CLIC1,ITGB1,CD44,RHOA,PPIA,CNN2,ACTG1,EPPK1,HBB,FGA,CD59
GO:0046822	Regulation of nucleocytoplasmic transport	9	112	8.03571	0.64	0.0134	9606.ENSP00000261574,9606.ENSP00000335153,9606.ENSP00000340278,9606.ENSP00000340989,9606.ENSP00000358081,9606.ENSP00000358866,9606.ENSP00000360609,9606.ENSP00000363641,9606.ENSP00000384863	IPO5,HSP90AA1,PARK7,SFN,BAG3,FLNA,HSP90AB1,TXN,XPO1
GO:0045921	Positive regulation of exocytosis	7	87	8.04598	0.64	0.0454	9606.ENSP00000306099,9606.ENSP00000333298,9606.ENSP00000336829,9606.ENSP00000346032,9606.ENSP00000377148,9606.ENSP00000411825,9606.ENSP00000498441	FGB,LAMP1,FGG,ANXA2,AP1G1,PDCD6IP,FGA
GO:0030036	Actin cytoskeleton organization	43	547	7.86106	0.63	2.4e-11	9606.ENSP00000216181,9606.ENSP00000219150,9606.ENSP00000225655,9606.ENSP00000246069,9606.ENSP00000252456,9606.ENSP00000252699,9606.ENSP00000264758,9606.ENSP00000312634,9606.ENSP00000316029,9606.ENSP00000320866,9606.ENSP00000323856,9606.ENSP00000324422,9606.ENSP00000338934,9606.ENSP00000348163,9606.ENSP00000349259,9606.ENSP00000354251,9606.ENSP00000354947,9606.ENSP00000357110,9606.ENSP00000358866,…	MYH9,CORO1A,PFN1,DSTN,CNN1,ACTN4,ADD1,PDLIM2,TLN1,CALR,PLEC,ZYX,EZR,PLS3,SPTBN1,NCKAP1,CAPZA2,EPB41L2,FLNA,CNN3,PDLIM1,CAP1,ANXA1,GRB2,ACTN1,ITGB1,MYH11,LCP1,TF,ARPC1B,RHOA,PDCD6IP,FLNB,WDR1,CNN2,ACTG1,SPTAN1,SPTA1,SPTB,ALDOA,TPM2,MYO1C,TPM3
GO:0010038	Response to metal ion	28	362	7.73481	0.63	2.7e-07	9606.ENSP00000215832,9606.ENSP00000228740,9606.ENSP00000241052,9606.ENSP00000254722,9606.ENSP00000264758,9606.ENSP00000268182,9606.ENSP00000270142,9606.ENSP00000297991,9606.ENSP00000306099,9606.ENSP00000313199,9606.ENSP00000320866,9606.ENSP00000336829,9606.ENSP00000339191,9606.ENSP00000340278,9606.ENSP00000362807,9606.ENSP00000363500,9606.ENSP00000377192,9606.ENSP00000378721,9606.ENSP00000385519,…	MAPK1,LTA4H,CAT,SERPINF1,ADD1,IQGAP1,SOD1,AQP3,FGB,HNRNPD,CALR,FGG,CAV1,PARK7,PEF1,CLIC4,G6PD,SEC31A,CD14,TF,ALAD,GDI1,ANXA11,GPI,PPP2CA,ACTG1,FGA,CUTA
GO:0007338	Single fertilization	12	154	7.79221	0.63	0.0025	9606.ENSP00000216181,9606.ENSP00000254810,9606.ENSP00000258091,9606.ENSP00000280326,9606.ENSP00000295688,9606.ENSP00000298223,9606.ENSP00000340278,9606.ENSP00000346300,9606.ENSP00000361635,9606.ENSP00000377284,9606.ENSP00000377958,9606.ENSP00000496166	MYH9,H3-3B,CCT7,CCT5,CCT3,FOLR2,PARK7,CRKL,VDAC2,FOLR1,CCT4,ALDOA
GO:0031333	Negative regulation of protein-containing complex assembly	11	142	7.74648	0.63	0.0049	9606.ENSP00000225655,9606.ENSP00000264758,9606.ENSP00000299138,9606.ENSP00000340278,9606.ENSP00000345347,9606.ENSP00000349259,9606.ENSP00000354947,9606.ENSP00000361635,9606.ENSP00000487444,9606.ENSP00000495214,9606.ENSP00000495909	PFN1,ADD1,VPS35,PARK7,HMGB1,SPTBN1,CAPZA2,VDAC2,SPTAN1,SPTA1,SPTB
GO:0010811	Positive regulation of cell-substrate adhesion	10	128	7.8125	0.63	0.0084	9606.ENSP00000225698,9606.ENSP00000306099,9606.ENSP00000320866,9606.ENSP00000336829,9606.ENSP00000337598,9606.ENSP00000346300,9606.ENSP00000358866,9606.ENSP00000369677,9606.ENSP00000373905,9606.ENSP00000498441	C1QBP,FGB,CALR,FGG,LIMS1,CRKL,FLNA,EMILIN1,DNM2,FGA
GO:0001906	Cell killing	10	129	7.75194	0.63	0.0088	9606.ENSP00000219150,9606.ENSP00000231751,9606.ENSP00000245907,9606.ENSP00000263408,9606.ENSP00000296028,9606.ENSP00000298556,9606.ENSP00000308541,9606.ENSP00000328359,9606.ENSP00000380070,9606.ENSP00000428085	CORO1A,LTF,C3,C9,PPBP,HPRT1,F2,DEFA3,GAPDH,RPL30
GO:0000910	Cytokinesis	9	114	7.89474	0.63	0.0147	9606.ENSP00000216181,9606.ENSP00000323856,9606.ENSP00000349259,9606.ENSP00000391249,9606.ENSP00000398610,9606.ENSP00000400175,9606.ENSP00000411825,9606.ENSP00000422896,9606.ENSP00000479861	MYH9,PLEC,SPTBN1,SEPTIN9,ANXA11,RHOA,PDCD6IP,SEPTIN11,SEPTIN2
GO:0030029	Actin filament-based process	46	609	7.55337	0.62	2e-11	9606.ENSP00000216181,9606.ENSP00000219150,9606.ENSP00000225655,9606.ENSP00000246069,9606.ENSP00000252456,9606.ENSP00000252699,9606.ENSP00000264758,9606.ENSP00000282541,9606.ENSP00000312634,9606.ENSP00000316029,9606.ENSP00000320866,9606.ENSP00000323856,9606.ENSP00000324422,9606.ENSP00000338934,9606.ENSP00000348163,9606.ENSP00000349259,9606.ENSP00000354251,9606.ENSP00000354947,9606.ENSP00000357110,…	MYH9,CORO1A,PFN1,DSTN,CNN1,ACTN4,ADD1,GPD1L,PDLIM2,TLN1,CALR,PLEC,ZYX,EZR,PLS3,SPTBN1,NCKAP1,CAPZA2,EPB41L2,FLNA,CNN3,PDLIM1,CAP1,ANXA1,GRB2,ACTN1,ITGB1,MYH11,LCP1,MYH8,TF,ARPC1B,RHOA,PDCD6IP,FLNB,WDR1,MYL6,CNN2,ACTG1,SPTAN1,SPTA1,SPTB,ALDOA,TPM2,MYO1C,TPM3
GO:0045861	Negative regulation of proteolysis	26	339	7.66962	0.62	8.54e-07	9606.ENSP00000221566,9606.ENSP00000231751,9606.ENSP00000245907,9606.ENSP00000254722,9606.ENSP00000261313,9606.ENSP00000265132,9606.ENSP00000268058,9606.ENSP00000273784,9606.ENSP00000295550,9606.ENSP00000298510,9606.ENSP00000308541,9606.ENSP00000321853,9606.ENSP00000323929,9606.ENSP00000340278,9606.ENSP00000340989,9606.ENSP00000345672,9606.ENSP00000346032,9606.ENSP00000359345,9606.ENSP00000360609,…	SGTA,LTF,C3,SERPINF1,PEBP1,AMBP,PML,AHSG,COL6A3,PRDX3,F2,SERPINF2,A2M,PARK7,SFN,CTSB,ANXA2,RPL5,HSP90AB1,GAPDH,ALAD,CD44,GPI,F8A3,SNX12,SERPINB6
GO:0001667	Ameboidal-type cell migration	15	197	7.61421	0.62	0.00049	9606.ENSP00000216181,9606.ENSP00000219150,9606.ENSP00000252999,9606.ENSP00000267257,9606.ENSP00000268058,9606.ENSP00000268182,9606.ENSP00000323856,9606.ENSP00000346550,9606.ENSP00000353731,9606.ENSP00000357288,9606.ENSP00000360305,9606.ENSP00000361883,9606.ENSP00000377284,9606.ENSP00000379350,9606.ENSP00000400175	MYH9,CORO1A,LAMA5,PXN,PML,IQGAP1,PLEC,ANXA6,DPP4,LAMTOR2,PDLIM1,CAP1,FOLR1,ITGB1,RHOA
GO:0000302	Response to reactive oxygen species	13	169	7.69231	0.62	0.0015	9606.ENSP00000215832,9606.ENSP00000216714,9606.ENSP00000225275,9606.ENSP00000241052,9606.ENSP00000265132,9606.ENSP00000267257,9606.ENSP00000270142,9606.ENSP00000278572,9606.ENSP00000298510,9606.ENSP00000340278,9606.ENSP00000348170,9606.ENSP00000366109,9606.ENSP00000494175	MAPK1,APEX1,MPO,CAT,AMBP,PXN,SOD1,RPS3,PRDX3,PARK7,HP,ANXA1,HBB
GO:2001242	Regulation of intrinsic apoptotic signaling pathway	13	169	7.69231	0.62	0.0015	9606.ENSP00000223136,9606.ENSP00000270142,9606.ENSP00000278572,9606.ENSP00000339191,9606.ENSP00000340278,9606.ENSP00000361635,9606.ENSP00000364802,9606.ENSP00000398632,9606.ENSP00000419425,9606.ENSP00000426909,9606.ENSP00000449089,9606.ENSP00000477781,9606.ENSP00000495530	FIS1,SOD1,RPS3,CAV1,PARK7,VDAC2,HSPA1A,CD44,PPIA,RACK1,DNM1L,TPT1,ENO1
GO:0044403	Biological process involved in symbiotic interaction	19	257	7.393	0.61	6.88e-05	9606.ENSP00000231751,9606.ENSP00000286713,9606.ENSP00000292609,9606.ENSP00000301764,9606.ENSP00000308541,9606.ENSP00000333298,9606.ENSP00000339191,9606.ENSP00000340019,9606.ENSP00000345656,9606.ENSP00000345672,9606.ENSP00000353731,9606.ENSP00000360609,9606.ENSP00000364802,9606.ENSP00000379350,9606.ENSP00000380070,9606.ENSP00000389351,9606.ENSP00000416269,9606.ENSP00000419425,9606.ENSP00000437125	LTF,STOM,PGLYRP2,DDB1,F2,LAMP1,CAV1,HSPD1,VAPA,CTSB,DPP4,HSP90AB1,HSPA1A,ITGB1,GAPDH,RPSA,DDX39B,PPIA,HSPA8
GO:0006457	Protein folding	16	215	7.44186	0.61	0.00035	9606.ENSP00000258091,9606.ENSP00000280326,9606.ENSP00000295688,9606.ENSP00000300289,9606.ENSP00000320866,9606.ENSP00000335153,9606.ENSP00000340019,9606.ENSP00000357051,9606.ENSP00000358081,9606.ENSP00000360609,9606.ENSP00000364802,9606.ENSP00000377958,9606.ENSP00000379042,9606.ENSP00000419425,9606.ENSP00000437125,9606.ENSP00000482075	CCT7,CCT5,CCT3,PDIA3,CALR,HSP90AA1,HSPD1,PEX19,BAG3,HSP90AB1,HSPA1A,CCT4,ERO1A,PPIA,HSPA8,PTGES3
GO:0051702	Biological process involved in interaction with symbiont	8	108	7.40741	0.61	0.0368	9606.ENSP00000231751,9606.ENSP00000286713,9606.ENSP00000301764,9606.ENSP00000308541,9606.ENSP00000340019,9606.ENSP00000345656,9606.ENSP00000380070,9606.ENSP00000437125	LTF,STOM,DDB1,F2,HSPD1,VAPA,GAPDH,HSPA8
GO:0062197	Cellular response to chemical stress	20	272	7.35294	0.6	4.51e-05	9606.ENSP00000215832,9606.ENSP00000216714,9606.ENSP00000225275,9606.ENSP00000241052,9606.ENSP00000265132,9606.ENSP00000267257,9606.ENSP00000268058,9606.ENSP00000270142,9606.ENSP00000278572,9606.ENSP00000285930,9606.ENSP00000298510,9606.ENSP00000323856,9606.ENSP00000339191,9606.ENSP00000340278,9606.ENSP00000364802,9606.ENSP00000366109,9606.ENSP00000375978,9606.ENSP00000377192,9606.ENSP00000419425,…	MAPK1,APEX1,MPO,CAT,AMBP,PXN,PML,SOD1,RPS3,AKR1B1,PRDX3,PLEC,CAV1,PARK7,HSPA1A,ANXA1,XRCC5,G6PD,PPIA,SERPINB6
GO:0007015	Actin filament organization	20	274	7.29927	0.6	4.84e-05	9606.ENSP00000219150,9606.ENSP00000246069,9606.ENSP00000264758,9606.ENSP00000323856,9606.ENSP00000324422,9606.ENSP00000338934,9606.ENSP00000348163,9606.ENSP00000358866,9606.ENSP00000360305,9606.ENSP00000377941,9606.ENSP00000381581,9606.ENSP00000385834,9606.ENSP00000389631,9606.ENSP00000400175,9606.ENSP00000427687,9606.ENSP00000495214,9606.ENSP00000496166,9606.ENSP00000496494,9606.ENSP00000496954,…	CORO1A,DSTN,ADD1,PLEC,ZYX,EZR,PLS3,FLNA,PDLIM1,ACTN1,LCP1,TF,ARPC1B,RHOA,WDR1,SPTA1,ALDOA,TPM2,MYO1C,TPM3
GO:0110053	Regulation of actin filament organization	20	276	7.24638	0.6	5.31e-05	9606.ENSP00000219150,9606.ENSP00000225655,9606.ENSP00000246069,9606.ENSP00000264758,9606.ENSP00000267257,9606.ENSP00000321853,9606.ENSP00000349259,9606.ENSP00000354251,9606.ENSP00000354947,9606.ENSP00000358866,9606.ENSP00000360269,9606.ENSP00000376345,9606.ENSP00000376800,9606.ENSP00000389631,9606.ENSP00000400175,9606.ENSP00000427687,9606.ENSP00000458162,9606.ENSP00000487444,9606.ENSP00000495214,…	CORO1A,PFN1,DSTN,ADD1,PXN,SERPINF2,SPTBN1,NCKAP1,CAPZA2,FLNA,TACSTD2,GRB2,MTPN,ARPC1B,RHOA,WDR1,ACTG1,SPTAN1,SPTA1,SPTB
GO:0010466	Negative regulation of peptidase activity	18	249	7.22892	0.6	0.00015	9606.ENSP00000231751,9606.ENSP00000245907,9606.ENSP00000254722,9606.ENSP00000261313,9606.ENSP00000265132,9606.ENSP00000273784,9606.ENSP00000295550,9606.ENSP00000298510,9606.ENSP00000321853,9606.ENSP00000323929,9606.ENSP00000340278,9606.ENSP00000340989,9606.ENSP00000345672,9606.ENSP00000346032,9606.ENSP00000380070,9606.ENSP00000398632,9606.ENSP00000405573,9606.ENSP00000484343	LTF,C3,SERPINF1,PEBP1,AMBP,AHSG,COL6A3,PRDX3,SERPINF2,A2M,PARK7,SFN,CTSB,ANXA2,GAPDH,CD44,GPI,SERPINB6
GO:0019058	Viral life cycle	13	178	7.30337	0.6	0.0023	9606.ENSP00000301764,9606.ENSP00000305556,9606.ENSP00000333298,9606.ENSP00000339191,9606.ENSP00000345656,9606.ENSP00000345672,9606.ENSP00000353731,9606.ENSP00000360609,9606.ENSP00000364802,9606.ENSP00000379350,9606.ENSP00000389351,9606.ENSP00000411825,9606.ENSP00000419425	DDB1,PCBP1,LAMP1,CAV1,VAPA,CTSB,DPP4,HSP90AB1,HSPA1A,ITGB1,RPSA,PDCD6IP,PPIA
GO:1902904	Negative regulation of supramolecular fiber organization	12	164	7.31707	0.6	0.0041	9606.ENSP00000219150,9606.ENSP00000225655,9606.ENSP00000264758,9606.ENSP00000349259,9606.ENSP00000354947,9606.ENSP00000360269,9606.ENSP00000363827,9606.ENSP00000369677,9606.ENSP00000437125,9606.ENSP00000487444,9606.ENSP00000495214,9606.ENSP00000495909	CORO1A,PFN1,ADD1,SPTBN1,CAPZA2,TACSTD2,HSPG2,EMILIN1,HSPA8,SPTAN1,SPTA1,SPTB
GO:0006518	Peptide metabolic process	39	547	7.1298	0.59	4.75e-09	9606.ENSP00000228740,9606.ENSP00000248342,9606.ENSP00000253039,9606.ENSP00000261772,9606.ENSP00000270142,9606.ENSP00000270625,9606.ENSP00000278572,9606.ENSP00000292609,9606.ENSP00000307940,9606.ENSP00000311430,9606.ENSP00000331901,9606.ENSP00000339063,9606.ENSP00000340278,9606.ENSP00000341885,9606.ENSP00000346015,9606.ENSP00000346088,9606.ENSP00000347495,9606.ENSP00000353731,9606.ENSP00000354357,…	LTA4H,EIF3K,EIF2S3,AARS1,SOD1,RPS11,RPS3,PGLYRP2,EEF2,RPL4,EEF1G,EEF1A1,PARK7,RPS2,RPL27A,RPL22,WARS1,DPP4,GSTM3,RPL12,CLIC2,RPL5,GLO1,RPS4X,CLIC1,RRBP1,EEF1B2,G6PD,ERO1A,RPL14,HAGH,RPSA,EEF1D,EIF4G1,CLIC3,RACK1,RPL30,DNPEP,RPS5
GO:0010035	Response to inorganic substance	38	532	7.14286	0.59	7.73e-09	9606.ENSP00000215832,9606.ENSP00000216714,9606.ENSP00000225275,9606.ENSP00000228740,9606.ENSP00000241052,9606.ENSP00000254722,9606.ENSP00000264758,9606.ENSP00000268182,9606.ENSP00000270142,9606.ENSP00000278572,9606.ENSP00000297991,9606.ENSP00000298510,9606.ENSP00000306099,9606.ENSP00000313199,9606.ENSP00000320866,9606.ENSP00000323856,9606.ENSP00000336829,9606.ENSP00000339191,9606.ENSP00000340278,…	MAPK1,APEX1,MPO,LTA4H,CAT,SERPINF1,ADD1,IQGAP1,SOD1,RPS3,AQP3,PRDX3,FGB,HNRNPD,CALR,PLEC,FGG,CAV1,PARK7,HP,PEF1,CLIC4,TXN,ANXA1,DNM2,G6PD,SEC31A,CD14,TF,ALAD,GDI1,ANXA11,GPI,PPP2CA,ACTG1,HBB,FGA,CUTA
GO:0006091	Generation of precursor metabolites and energy	29	411	7.05596	0.59	6.7e-07	9606.ENSP00000241052,9606.ENSP00000252603,9606.ENSP00000261733,9606.ENSP00000269848,9606.ENSP00000285930,9606.ENSP00000306606,9606.ENSP00000317159,9606.ENSP00000320171,9606.ENSP00000321259,9606.ENSP00000323856,9606.ENSP00000327070,9606.ENSP00000339720,9606.ENSP00000352401,9606.ENSP00000359991,9606.ENSP00000360124,9606.ENSP00000362413,9606.ENSP00000363614,9606.ENSP00000377192,9606.ENSP00000378769,…	CAT,PGLS,ALDH2,PFKL,AKR1B1,ADH1B,CYC1,PKM,TALDO1,PLEC,MDH2,NDUFA4,RPE,PGAM1,PGM1,PGK1,HMGCL,G6PD,PPP1CB,GAPDH,OGDH,GPI,COX7C,ENO2,COX6B1,PTGES3,PHGDH,ENO1,ALDOA
GO:1904951	Positive regulation of establishment of protein localization	23	319	7.21003	0.59	1.15e-05	9606.ENSP00000223136,9606.ENSP00000258091,9606.ENSP00000261574,9606.ENSP00000277865,9606.ENSP00000280326,9606.ENSP00000286713,9606.ENSP00000295688,9606.ENSP00000299138,9606.ENSP00000306099,9606.ENSP00000335153,9606.ENSP00000336829,9606.ENSP00000338934,9606.ENSP00000340989,9606.ENSP00000353099,9606.ENSP00000358081,9606.ENSP00000358866,9606.ENSP00000360609,9606.ENSP00000377958,9606.ENSP00000419425,…	FIS1,CCT7,IPO5,GLUD1,CCT5,STOM,CCT3,VPS35,FGB,HSP90AA1,FGG,EZR,SFN,HLA-DRB1,BAG3,FLNA,HSP90AB1,CCT4,PPIA,RACK1,DNM1L,MYO1C,FGA
GO:0022604	Regulation of cell morphogenesis	22	311	7.07395	0.59	2.37e-05	9606.ENSP00000216181,9606.ENSP00000219150,9606.ENSP00000225698,9606.ENSP00000252699,9606.ENSP00000261263,9606.ENSP00000306099,9606.ENSP00000308541,9606.ENSP00000320866,9606.ENSP00000336829,9606.ENSP00000337598,9606.ENSP00000338934,9606.ENSP00000346300,9606.ENSP00000358866,9606.ENSP00000360269,9606.ENSP00000366109,9606.ENSP00000373905,9606.ENSP00000398632,9606.ENSP00000400175,9606.ENSP00000427687,…	MYH9,CORO1A,C1QBP,ACTN4,RAB21,FGB,F2,CALR,FGG,LIMS1,EZR,CRKL,FLNA,TACSTD2,ANXA1,DNM2,CD44,RHOA,WDR1,SPTA1,ALDOA,FGA
GO:0010951	Negative regulation of endopeptidase activity	17	240	7.08333	0.59	0.00033	9606.ENSP00000231751,9606.ENSP00000245907,9606.ENSP00000254722,9606.ENSP00000261313,9606.ENSP00000265132,9606.ENSP00000273784,9606.ENSP00000295550,9606.ENSP00000298510,9606.ENSP00000321853,9606.ENSP00000323929,9606.ENSP00000340278,9606.ENSP00000340989,9606.ENSP00000346032,9606.ENSP00000380070,9606.ENSP00000398632,9606.ENSP00000405573,9606.ENSP00000484343	LTF,C3,SERPINF1,PEBP1,AMBP,AHSG,COL6A3,PRDX3,SERPINF2,A2M,PARK7,SFN,ANXA2,GAPDH,CD44,GPI,SERPINB6
GO:0007163	Establishment or maintenance of cell polarity	15	212	7.07547	0.59	0.001	9606.ENSP00000216181,9606.ENSP00000265709,9606.ENSP00000335153,9606.ENSP00000338934,9606.ENSP00000346300,9606.ENSP00000353375,9606.ENSP00000357283,9606.ENSP00000360305,9606.ENSP00000360609,9606.ENSP00000361883,9606.ENSP00000363500,9606.ENSP00000379350,9606.ENSP00000400175,9606.ENSP00000411825,9606.ENSP00000427687	MYH9,ANK1,HSP90AA1,EZR,CRKL,MAP4,LMNA,PDLIM1,HSP90AB1,CAP1,CLIC4,ITGB1,RHOA,PDCD6IP,WDR1
GO:0031589	Cell-substrate adhesion	14	195	7.17949	0.59	0.0015	9606.ENSP00000219150,9606.ENSP00000252999,9606.ENSP00000267257,9606.ENSP00000270233,9606.ENSP00000279227,9606.ENSP00000306099,9606.ENSP00000324422,9606.ENSP00000336829,9606.ENSP00000369677,9606.ENSP00000377941,9606.ENSP00000379350,9606.ENSP00000398632,9606.ENSP00000400175,9606.ENSP00000498441	CORO1A,LAMA5,PXN,BCAM,FERMT3,FGB,ZYX,FGG,EMILIN1,ACTN1,ITGB1,CD44,RHOA,FGA
GO:0044000	Movement in host	10	139	7.19424	0.59	0.0144	9606.ENSP00000301764,9606.ENSP00000333298,9606.ENSP00000339191,9606.ENSP00000345656,9606.ENSP00000345672,9606.ENSP00000353731,9606.ENSP00000364802,9606.ENSP00000379350,9606.ENSP00000389351,9606.ENSP00000419425	DDB1,LAMP1,CAV1,VAPA,CTSB,DPP4,HSPA1A,ITGB1,RPSA,PPIA
GO:0045471	Response to ethanol	9	126	7.14286	0.59	0.0257	9606.ENSP00000241052,9606.ENSP00000245206,9606.ENSP00000270142,9606.ENSP00000362744,9606.ENSP00000377192,9606.ENSP00000385519,9606.ENSP00000386284,9606.ENSP00000400175,9606.ENSP00000416255	CAT,GOT2,SOD1,RPS4X,G6PD,CD14,ALAD,RHOA,EIF4G1
GO:0003014	Renal system process	8	111	7.20721	0.59	0.0423	9606.ENSP00000262418,9606.ENSP00000285930,9606.ENSP00000297991,9606.ENSP00000312999,9606.ENSP00000321853,9606.ENSP00000400175,9606.ENSP00000440066,9606.ENSP00000494175	SLC4A1,AKR1B1,AQP3,GNAI2,SERPINF2,RHOA,JCHAIN,HBB
GO:0010810	Regulation of cell-substrate adhesion	15	217	6.91244	0.58	0.0013	9606.ENSP00000225698,9606.ENSP00000252699,9606.ENSP00000306099,9606.ENSP00000316029,9606.ENSP00000320866,9606.ENSP00000336829,9606.ENSP00000337598,9606.ENSP00000346300,9606.ENSP00000358866,9606.ENSP00000360269,9606.ENSP00000369677,9606.ENSP00000373905,9606.ENSP00000400175,9606.ENSP00000458162,9606.ENSP00000498441	C1QBP,ACTN4,FGB,TLN1,CALR,FGG,LIMS1,CRKL,FLNA,TACSTD2,EMILIN1,DNM2,RHOA,ACTG1,FGA
GO:0016485	Protein processing	14	202	6.93069	0.58	0.0021	9606.ENSP00000205948,9606.ENSP00000253496,9606.ENSP00000264690,9606.ENSP00000296411,9606.ENSP00000306099,9606.ENSP00000308541,9606.ENSP00000336829,9606.ENSP00000348170,9606.ENSP00000353731,9606.ENSP00000362413,9606.ENSP00000379042,9606.ENSP00000444271,9606.ENSP00000460236,9606.ENSP00000498441	APOH,F12,KLKB1,METAP1,FGB,F2,FGG,HP,DPP4,PGK1,ERO1A,C1R,SPON1,FGA
GO:0022618	Ribonucleoprotein complex assembly	14	203	6.89655	0.58	0.0022	9606.ENSP00000248342,9606.ENSP00000253039,9606.ENSP00000335153,9606.ENSP00000335321,9606.ENSP00000342374,9606.ENSP00000359345,9606.ENSP00000360609,9606.ENSP00000375978,9606.ENSP00000389351,9606.ENSP00000393388,9606.ENSP00000416269,9606.ENSP00000460348,9606.ENSP00000472985,9606.ENSP00000482075	EIF3K,EIF2S3,HSP90AA1,SF3B1,SNRPD2,RPL5,HSP90AB1,XRCC5,RPSA,SNRPG,DDX39B,PRPF8,RPS5,PTGES3
GO:2000377	Regulation of reactive oxygen species metabolic process	10	143	6.99301	0.58	0.017	9606.ENSP00000270142,9606.ENSP00000303356,9606.ENSP00000308541,9606.ENSP00000312999,9606.ENSP00000340278,9606.ENSP00000348170,9606.ENSP00000370254,9606.ENSP00000376345,9606.ENSP00000377192,9606.ENSP00000400175	SOD1,DCXR,F2,GNAI2,PARK7,HP,AKR1C1,GRB2,G6PD,RHOA
GO:0045727	Positive regulation of translation	10	144	6.94444	0.58	0.0176	9606.ENSP00000221419,9606.ENSP00000225698,9606.ENSP00000253039,9606.ENSP00000307940,9606.ENSP00000313199,9606.ENSP00000320171,9606.ENSP00000359345,9606.ENSP00000362744,9606.ENSP00000400175,9606.ENSP00000416255	HNRNPL,C1QBP,EIF2S3,EEF2,HNRNPD,PKM,RPL5,RPS4X,RHOA,EIF4G1
GO:2001235	Positive regulation of apoptotic signaling pathway	9	130	6.92308	0.58	0.0303	9606.ENSP00000223136,9606.ENSP00000268058,9606.ENSP00000270142,9606.ENSP00000278572,9606.ENSP00000300289,9606.ENSP00000339191,9606.ENSP00000340278,9606.ENSP00000426909,9606.ENSP00000449089	FIS1,PML,SOD1,RPS3,PDIA3,CAV1,PARK7,RACK1,DNM1L
GO:1902903	Regulation of supramolecular fiber organization	26	382	6.80628	0.57	5.44e-06	9606.ENSP00000219150,9606.ENSP00000225655,9606.ENSP00000246069,9606.ENSP00000264758,9606.ENSP00000267257,9606.ENSP00000278572,9606.ENSP00000321853,9606.ENSP00000340278,9606.ENSP00000349259,9606.ENSP00000354251,9606.ENSP00000354947,9606.ENSP00000358866,9606.ENSP00000360269,9606.ENSP00000363827,9606.ENSP00000364802,9606.ENSP00000369677,9606.ENSP00000376345,9606.ENSP00000376800,9606.ENSP00000389631,…	CORO1A,PFN1,DSTN,ADD1,PXN,RPS3,SERPINF2,PARK7,SPTBN1,NCKAP1,CAPZA2,FLNA,TACSTD2,HSPG2,HSPA1A,EMILIN1,GRB2,MTPN,ARPC1B,RHOA,WDR1,HSPA8,ACTG1,SPTAN1,SPTA1,SPTB
GO:0031334	Positive regulation of protein-containing complex assembly	13	193	6.73575	0.57	0.0046	9606.ENSP00000225655,9606.ENSP00000278572,9606.ENSP00000335153,9606.ENSP00000340278,9606.ENSP00000347495,9606.ENSP00000354251,9606.ENSP00000364802,9606.ENSP00000376345,9606.ENSP00000381581,9606.ENSP00000400175,9606.ENSP00000416255,9606.ENSP00000426909,9606.ENSP00000442318	PFN1,RPS3,HSP90AA1,PARK7,WARS1,NCKAP1,HSPA1A,GRB2,LCP1,RHOA,EIF4G1,RACK1,CAND1
GO:0007009	Plasma membrane organization	10	146	6.84932	0.57	0.0192	9606.ENSP00000216181,9606.ENSP00000262418,9606.ENSP00000270142,9606.ENSP00000298223,9606.ENSP00000323856,9606.ENSP00000339191,9606.ENSP00000346550,9606.ENSP00000349259,9606.ENSP00000377284,9606.ENSP00000495214	MYH9,SLC4A1,SOD1,FOLR2,PLEC,CAV1,ANXA6,SPTBN1,FOLR1,SPTA1
GO:0050714	Positive regulation of protein secretion	9	131	6.87023	0.57	0.0318	9606.ENSP00000277865,9606.ENSP00000299138,9606.ENSP00000306099,9606.ENSP00000336829,9606.ENSP00000338934,9606.ENSP00000353099,9606.ENSP00000419425,9606.ENSP00000449089,9606.ENSP00000498441	GLUD1,VPS35,FGB,FGG,EZR,HLA-DRB1,PPIA,DNM1L,FGA
GO:0016051	Carbohydrate biosynthetic process	9	133	6.76692	0.57	0.0345	9606.ENSP00000285930,9606.ENSP00000327070,9606.ENSP00000337746,9606.ENSP00000360124,9606.ENSP00000362413,9606.ENSP00000377192,9606.ENSP00000405573,9606.ENSP00000437402,9606.ENSP00000482075	AKR1B1,MDH2,ISYNA1,PGM1,PGK1,G6PD,GPI,ENO2,PTGES3
GO:0006959	Humoral immune response	18	268	6.71642	0.56	0.00035	9606.ENSP00000225698,9606.ENSP00000231751,9606.ENSP00000245907,9606.ENSP00000263408,9606.ENSP00000296028,9606.ENSP00000306099,9606.ENSP00000308541,9606.ENSP00000328359,9606.ENSP00000353099,9606.ENSP00000356399,9606.ENSP00000380070,9606.ENSP00000385834,9606.ENSP00000405573,9606.ENSP00000416561,9606.ENSP00000428085,9606.ENSP00000440066,9606.ENSP00000444271,9606.ENSP00000498441	C1QBP,LTF,C3,C9,PPBP,FGB,F2,DEFA3,HLA-DRB1,CFH,GAPDH,TF,GPI,CFB,RPL30,JCHAIN,C1R,FGA
GO:0034599	Cellular response to oxidative stress	15	224	6.69643	0.56	0.0017	9606.ENSP00000215832,9606.ENSP00000216714,9606.ENSP00000225275,9606.ENSP00000241052,9606.ENSP00000265132,9606.ENSP00000267257,9606.ENSP00000268058,9606.ENSP00000270142,9606.ENSP00000278572,9606.ENSP00000298510,9606.ENSP00000340278,9606.ENSP00000364802,9606.ENSP00000366109,9606.ENSP00000377192,9606.ENSP00000419425	MAPK1,APEX1,MPO,CAT,AMBP,PXN,PML,SOD1,RPS3,PRDX3,PARK7,HSPA1A,ANXA1,G6PD,PPIA
GO:0009566	Fertilization	13	195	6.66667	0.56	0.005	9606.ENSP00000216181,9606.ENSP00000254810,9606.ENSP00000258091,9606.ENSP00000280326,9606.ENSP00000295688,9606.ENSP00000298223,9606.ENSP00000340278,9606.ENSP00000346300,9606.ENSP00000361635,9606.ENSP00000363500,9606.ENSP00000377284,9606.ENSP00000377958,9606.ENSP00000496166	MYH9,H3-3B,CCT7,CCT5,CCT3,FOLR2,PARK7,CRKL,VDAC2,CLIC4,FOLR1,CCT4,ALDOA
GO:0019730	Antimicrobial humoral response	10	149	6.71141	0.56	0.0216	9606.ENSP00000231751,9606.ENSP00000296028,9606.ENSP00000306099,9606.ENSP00000308541,9606.ENSP00000328359,9606.ENSP00000380070,9606.ENSP00000385834,9606.ENSP00000428085,9606.ENSP00000440066,9606.ENSP00000498441	LTF,PPBP,FGB,F2,DEFA3,GAPDH,TF,RPL30,JCHAIN,FGA
GO:1903829	Positive regulation of protein localization	30	461	6.50759	0.55	1.63e-06	9606.ENSP00000223136,9606.ENSP00000258091,9606.ENSP00000261574,9606.ENSP00000268058,9606.ENSP00000277865,9606.ENSP00000280326,9606.ENSP00000282541,9606.ENSP00000286713,9606.ENSP00000295688,9606.ENSP00000299138,9606.ENSP00000306099,9606.ENSP00000308541,9606.ENSP00000335153,9606.ENSP00000336829,9606.ENSP00000338934,9606.ENSP00000340278,9606.ENSP00000340989,9606.ENSP00000349259,9606.ENSP00000353099,…	FIS1,CCT7,IPO5,PML,GLUD1,CCT5,GPD1L,STOM,CCT3,VPS35,FGB,F2,HSP90AA1,FGG,EZR,PARK7,SFN,SPTBN1,HLA-DRB1,EPB41L2,BAG3,FLNA,HSP90AB1,CCT4,ITGB1,PPIA,RACK1,DNM1L,MYO1C,FGA
GO:0009611	Response to wounding	29	444	6.53153	0.55	2.33e-06	9606.ENSP00000205948,9606.ENSP00000216181,9606.ENSP00000253496,9606.ENSP00000262418,9606.ENSP00000264690,9606.ENSP00000270142,9606.ENSP00000279227,9606.ENSP00000296411,9606.ENSP00000306099,9606.ENSP00000308541,9606.ENSP00000316029,9606.ENSP00000319096,9606.ENSP00000323856,9606.ENSP00000336829,9606.ENSP00000340510,9606.ENSP00000346550,9606.ENSP00000358866,9606.ENSP00000364935,9606.ENSP00000377284,…	APOH,MYH9,F12,SLC4A1,KLKB1,SOD1,FERMT3,METAP1,FGB,F2,TLN1,RAP2B,PLEC,FGG,PPL,ANXA6,FLNA,CLIC1,FOLR1,ITGB1,CD44,RHOA,PPIA,CNN2,ACTG1,EPPK1,HBB,FGA,CD59
GO:0043254	Regulation of protein-containing complex assembly	27	413	6.53753	0.55	6.19e-06	9606.ENSP00000219150,9606.ENSP00000225655,9606.ENSP00000254810,9606.ENSP00000264758,9606.ENSP00000278572,9606.ENSP00000299138,9606.ENSP00000335153,9606.ENSP00000340278,9606.ENSP00000345347,9606.ENSP00000347495,9606.ENSP00000349259,9606.ENSP00000354251,9606.ENSP00000354947,9606.ENSP00000361635,9606.ENSP00000364802,9606.ENSP00000376345,9606.ENSP00000376800,9606.ENSP00000381581,9606.ENSP00000389631,…	CORO1A,PFN1,H3-3B,ADD1,RPS3,VPS35,HSP90AA1,PARK7,HMGB1,WARS1,SPTBN1,NCKAP1,CAPZA2,VDAC2,HSPA1A,GRB2,MTPN,LCP1,ARPC1B,RHOA,EIF4G1,RACK1,HSPA8,CAND1,SPTAN1,SPTA1,SPTB
GO:0032386	Regulation of intracellular transport	22	341	6.45161	0.55	7.57e-05	9606.ENSP00000215832,9606.ENSP00000223136,9606.ENSP00000261263,9606.ENSP00000261574,9606.ENSP00000286713,9606.ENSP00000299138,9606.ENSP00000333298,9606.ENSP00000335153,9606.ENSP00000338934,9606.ENSP00000340278,9606.ENSP00000340989,9606.ENSP00000346032,9606.ENSP00000348965,9606.ENSP00000358081,9606.ENSP00000358866,9606.ENSP00000360609,9606.ENSP00000363641,9606.ENSP00000381581,9606.ENSP00000384863,…	MAPK1,FIS1,RAB21,IPO5,STOM,VPS35,LAMP1,HSP90AA1,EZR,PARK7,SFN,ANXA2,DYNC1H1,BAG3,FLNA,HSP90AB1,TXN,LCP1,XPO1,GDI1,SNX12,MYO1C
GO:0006412	Translation	25	389	6.42674	0.54	2.01e-05	9606.ENSP00000248342,9606.ENSP00000253039,9606.ENSP00000261772,9606.ENSP00000270625,9606.ENSP00000278572,9606.ENSP00000307940,9606.ENSP00000311430,9606.ENSP00000331901,9606.ENSP00000339063,9606.ENSP00000341885,9606.ENSP00000346015,9606.ENSP00000346088,9606.ENSP00000347495,9606.ENSP00000354739,9606.ENSP00000359345,9606.ENSP00000362744,9606.ENSP00000367038,9606.ENSP00000376055,9606.ENSP00000379506,…	EIF3K,EIF2S3,AARS1,RPS11,RPS3,EEF2,RPL4,EEF1G,EEF1A1,RPS2,RPL27A,RPL22,WARS1,RPL12,RPL5,RPS4X,RRBP1,EEF1B2,RPL14,RPSA,EEF1D,EIF4G1,RACK1,RPL30,RPS5
GO:0032388	Positive regulation of intracellular transport	13	203	6.40394	0.54	0.0067	9606.ENSP00000223136,9606.ENSP00000261263,9606.ENSP00000261574,9606.ENSP00000286713,9606.ENSP00000335153,9606.ENSP00000338934,9606.ENSP00000340989,9606.ENSP00000346032,9606.ENSP00000348965,9606.ENSP00000358081,9606.ENSP00000358866,9606.ENSP00000360609,9606.ENSP00000496954	FIS1,RAB21,IPO5,STOM,HSP90AA1,EZR,SFN,ANXA2,DYNC1H1,BAG3,FLNA,HSP90AB1,MYO1C
GO:0043281	Regulation of cysteine-type endopeptidase activity involved in apoptotic process	13	205	6.34146	0.54	0.0073	9606.ENSP00000223136,9606.ENSP00000236671,9606.ENSP00000268058,9606.ENSP00000278572,9606.ENSP00000298510,9606.ENSP00000340019,9606.ENSP00000340278,9606.ENSP00000340989,9606.ENSP00000345347,9606.ENSP00000398632,9606.ENSP00000400175,9606.ENSP00000405573,9606.ENSP00000426909	FIS1,CTSD,PML,RPS3,PRDX3,HSPD1,PARK7,SFN,HMGB1,CD44,RHOA,GPI,RACK1
GO:0002833	Positive regulation of response to biotic stimulus	12	187	6.41711	0.54	0.0109	9606.ENSP00000265983,9606.ENSP00000311747,9606.ENSP00000333298,9606.ENSP00000335153,9606.ENSP00000340019,9606.ENSP00000345347,9606.ENSP00000353099,9606.ENSP00000369677,9606.ENSP00000375978,9606.ENSP00000377148,9606.ENSP00000385519,9606.ENSP00000498596	HPX,RBM14,LAMP1,HSP90AA1,HSPD1,HMGB1,HLA-DRB1,EMILIN1,XRCC5,AP1G1,CD14,STING1
GO:0052547	Regulation of peptidase activity	28	446	6.27803	0.53	7.59e-06	9606.ENSP00000216802,9606.ENSP00000223136,9606.ENSP00000231751,9606.ENSP00000236671,9606.ENSP00000245907,9606.ENSP00000254722,9606.ENSP00000261313,9606.ENSP00000265132,9606.ENSP00000268058,9606.ENSP00000273784,9606.ENSP00000278572,9606.ENSP00000295550,9606.ENSP00000298510,9606.ENSP00000321853,9606.ENSP00000323929,9606.ENSP00000339191,9606.ENSP00000340019,9606.ENSP00000340278,9606.ENSP00000340989,…	PSME2,FIS1,LTF,CTSD,C3,SERPINF1,PEBP1,AMBP,PML,AHSG,RPS3,COL6A3,PRDX3,SERPINF2,A2M,CAV1,HSPD1,PARK7,SFN,HMGB1,CTSB,ANXA2,GAPDH,CD44,RHOA,GPI,RACK1,SERPINB6
GO:0052548	Regulation of endopeptidase activity	26	414	6.28019	0.53	1.83e-05	9606.ENSP00000216802,9606.ENSP00000223136,9606.ENSP00000231751,9606.ENSP00000236671,9606.ENSP00000245907,9606.ENSP00000254722,9606.ENSP00000261313,9606.ENSP00000265132,9606.ENSP00000268058,9606.ENSP00000273784,9606.ENSP00000278572,9606.ENSP00000295550,9606.ENSP00000298510,9606.ENSP00000321853,9606.ENSP00000323929,9606.ENSP00000340019,9606.ENSP00000340278,9606.ENSP00000340989,9606.ENSP00000345347,…	PSME2,FIS1,LTF,CTSD,C3,SERPINF1,PEBP1,AMBP,PML,AHSG,RPS3,COL6A3,PRDX3,SERPINF2,A2M,HSPD1,PARK7,SFN,HMGB1,ANXA2,GAPDH,CD44,RHOA,GPI,RACK1,SERPINB6
GO:0043043	Peptide biosynthetic process	26	417	6.23501	0.53	1.99e-05	9606.ENSP00000248342,9606.ENSP00000253039,9606.ENSP00000261772,9606.ENSP00000270625,9606.ENSP00000278572,9606.ENSP00000307940,9606.ENSP00000311430,9606.ENSP00000331901,9606.ENSP00000339063,9606.ENSP00000341885,9606.ENSP00000346015,9606.ENSP00000346088,9606.ENSP00000347495,9606.ENSP00000354739,9606.ENSP00000359345,9606.ENSP00000362744,9606.ENSP00000367038,9606.ENSP00000376055,9606.ENSP00000379506,…	EIF3K,EIF2S3,AARS1,RPS11,RPS3,EEF2,RPL4,EEF1G,EEF1A1,RPS2,RPL27A,RPL22,WARS1,RPL12,RPL5,RPS4X,RRBP1,EEF1B2,RPL14,HAGH,RPSA,EEF1D,EIF4G1,RACK1,RPL30,RPS5
GO:0006163	Purine nucleotide metabolic process	25	403	6.20347	0.53	3.49e-05	9606.ENSP00000269848,9606.ENSP00000298556,9606.ENSP00000304229,9606.ENSP00000313490,9606.ENSP00000320171,9606.ENSP00000358547,9606.ENSP00000359991,9606.ENSP00000360124,9606.ENSP00000362413,9606.ENSP00000364802,9606.ENSP00000368605,9606.ENSP00000376886,9606.ENSP00000380070,9606.ENSP00000382595,9606.ENSP00000384330,9606.ENSP00000388183,9606.ENSP00000400175,9606.ENSP00000405573,9606.ENSP00000420065,…	PFKL,HPRT1,HINT1,PFAS,PKM,MPP1,PGAM1,PGM1,PGK1,HSPA1A,ACOT9,NME2,GAPDH,PAICS,MYH8,OGDH,RHOA,GPI,ABHD14B,ACSL1,HSPA8,ENO2,SAMHD1,ENO1,ALDOA
GO:0009150	Purine ribonucleotide metabolic process	24	390	6.15385	0.53	6.01e-05	9606.ENSP00000269848,9606.ENSP00000298556,9606.ENSP00000304229,9606.ENSP00000313490,9606.ENSP00000320171,9606.ENSP00000358547,9606.ENSP00000359991,9606.ENSP00000360124,9606.ENSP00000362413,9606.ENSP00000364802,9606.ENSP00000368605,9606.ENSP00000376886,9606.ENSP00000380070,9606.ENSP00000382595,9606.ENSP00000384330,9606.ENSP00000388183,9606.ENSP00000400175,9606.ENSP00000405573,9606.ENSP00000420065,…	PFKL,HPRT1,HINT1,PFAS,PKM,MPP1,PGAM1,PGM1,PGK1,HSPA1A,ACOT9,NME2,GAPDH,PAICS,MYH8,OGDH,RHOA,GPI,ABHD14B,ACSL1,HSPA8,ENO2,ENO1,ALDOA
GO:0006979	Response to oxidative stress	23	368	6.25	0.53	7.23e-05	9606.ENSP00000215832,9606.ENSP00000216714,9606.ENSP00000225275,9606.ENSP00000225371,9606.ENSP00000241052,9606.ENSP00000265132,9606.ENSP00000267257,9606.ENSP00000268058,9606.ENSP00000270142,9606.ENSP00000278572,9606.ENSP00000298510,9606.ENSP00000340278,9606.ENSP00000342026,9606.ENSP00000348170,9606.ENSP00000360305,9606.ENSP00000364802,9606.ENSP00000366109,9606.ENSP00000377192,9606.ENSP00000379042,…	MAPK1,APEX1,MPO,EPX,CAT,AMBP,PXN,PML,SOD1,RPS3,PRDX3,PARK7,PRDX6,HP,PDLIM1,HSPA1A,ANXA1,G6PD,ERO1A,ALAD,PPIA,ATOX1,HBB
GO:0051222	Positive regulation of protein transport	19	303	6.27063	0.53	0.00045	9606.ENSP00000223136,9606.ENSP00000261574,9606.ENSP00000277865,9606.ENSP00000286713,9606.ENSP00000299138,9606.ENSP00000306099,9606.ENSP00000335153,9606.ENSP00000336829,9606.ENSP00000338934,9606.ENSP00000340989,9606.ENSP00000353099,9606.ENSP00000358081,9606.ENSP00000358866,9606.ENSP00000360609,9606.ENSP00000419425,9606.ENSP00000426909,9606.ENSP00000449089,9606.ENSP00000496954,9606.ENSP00000498441	FIS1,IPO5,GLUD1,STOM,VPS35,FGB,HSP90AA1,FGG,EZR,SFN,HLA-DRB1,BAG3,FLNA,HSP90AB1,PPIA,RACK1,DNM1L,MYO1C,FGA
GO:0048193	Golgi vesicle transport	18	292	6.16438	0.53	0.00088	9606.ENSP00000265709,9606.ENSP00000303366,9606.ENSP00000325002,9606.ENSP00000329419,9606.ENSP00000330945,9606.ENSP00000333298,9606.ENSP00000338844,9606.ENSP00000345656,9606.ENSP00000349259,9606.ENSP00000357048,9606.ENSP00000362807,9606.ENSP00000373312,9606.ENSP00000373905,9606.ENSP00000377148,9606.ENSP00000378721,9606.ENSP00000405926,9606.ENSP00000469035,9606.ENSP00000481314	ANK1,LMAN2,COPG1,COPB2,TMED9,LAMP1,SEC23B,VAPA,SPTBN1,COPA,PEF1,SEC13,DNM2,AP1G1,SEC31A,TMED7,COPE,SNX12
GO:0051494	Negative regulation of cytoskeleton organization	10	161	6.21118	0.53	0.0345	9606.ENSP00000219150,9606.ENSP00000225655,9606.ENSP00000264758,9606.ENSP00000311747,9606.ENSP00000349259,9606.ENSP00000354947,9606.ENSP00000360269,9606.ENSP00000487444,9606.ENSP00000495214,9606.ENSP00000495909	CORO1A,PFN1,ADD1,RBM14,SPTBN1,CAPZA2,TACSTD2,SPTAN1,SPTA1,SPTB
GO:0070201	Regulation of establishment of protein localization	32	528	6.06061	0.52	2.2e-06	9606.ENSP00000223136,9606.ENSP00000236671,9606.ENSP00000258091,9606.ENSP00000261574,9606.ENSP00000269848,9606.ENSP00000277865,9606.ENSP00000280326,9606.ENSP00000286713,9606.ENSP00000295688,9606.ENSP00000299138,9606.ENSP00000306099,9606.ENSP00000335153,9606.ENSP00000336829,9606.ENSP00000338934,9606.ENSP00000340278,9606.ENSP00000340989,9606.ENSP00000353099,9606.ENSP00000358081,9606.ENSP00000358866,…	FIS1,CTSD,CCT7,IPO5,PFKL,GLUD1,CCT5,STOM,CCT3,VPS35,FGB,HSP90AA1,FGG,EZR,PARK7,SFN,HLA-DRB1,BAG3,FLNA,HSP90AB1,TXN,CCT4,LCP1,XPO1,GDI1,PPIA,RACK1,HSPA8,DNM1L,SNX12,MYO1C,FGA
GO:0002685	Regulation of leukocyte migration	14	231	6.06061	0.52	0.0066	9606.ENSP00000215832,9606.ENSP00000219150,9606.ENSP00000225698,9606.ENSP00000320866,9606.ENSP00000345347,9606.ENSP00000346300,9606.ENSP00000353731,9606.ENSP00000358547,9606.ENSP00000366109,9606.ENSP00000369677,9606.ENSP00000381386,9606.ENSP00000400175,9606.ENSP00000449089,9606.ENSP00000456436	MAPK1,CORO1A,C1QBP,CALR,HMGB1,CRKL,DPP4,MPP1,ANXA1,EMILIN1,DDT,RHOA,DNM1L,CNN2
GO:0033157	Regulation of intracellular protein transport	14	231	6.06061	0.52	0.0066	9606.ENSP00000223136,9606.ENSP00000261574,9606.ENSP00000286713,9606.ENSP00000335153,9606.ENSP00000340278,9606.ENSP00000340989,9606.ENSP00000358081,9606.ENSP00000358866,9606.ENSP00000360609,9606.ENSP00000363641,9606.ENSP00000381581,9606.ENSP00000384863,9606.ENSP00000394071,9606.ENSP00000496954	FIS1,IPO5,STOM,HSP90AA1,PARK7,SFN,BAG3,FLNA,HSP90AB1,TXN,LCP1,XPO1,GDI1,MYO1C
GO:0005975	Carbohydrate metabolic process	28	470	5.95745	0.51	1.73e-05	9606.ENSP00000252603,9606.ENSP00000258317,9606.ENSP00000261733,9606.ENSP00000269848,9606.ENSP00000282541,9606.ENSP00000285930,9606.ENSP00000297258,9606.ENSP00000303356,9606.ENSP00000320171,9606.ENSP00000321259,9606.ENSP00000325527,9606.ENSP00000327070,9606.ENSP00000337746,9606.ENSP00000352401,9606.ENSP00000359664,9606.ENSP00000359991,9606.ENSP00000360124,9606.ENSP00000362413,9606.ENSP00000362463,…	PGLS,NPL,ALDH2,PFKL,GPD1L,AKR1B1,FABP5,DCXR,PKM,TALDO1,FBN1,MDH2,ISYNA1,RPE,CTBS,PGAM1,PGM1,PGK1,GLO1,G6PD,PPP1CB,GAPDH,OGDH,GPI,ENO2,PTGES3,ENO1,ALDOA
GO:0006417	Regulation of translation	27	456	5.92105	0.51	2.83e-05	9606.ENSP00000221419,9606.ENSP00000225698,9606.ENSP00000248342,9606.ENSP00000253039,9606.ENSP00000261772,9606.ENSP00000263579,9606.ENSP00000268058,9606.ENSP00000278572,9606.ENSP00000296411,9606.ENSP00000302886,9606.ENSP00000305230,9606.ENSP00000307940,9606.ENSP00000313199,9606.ENSP00000320171,9606.ENSP00000320866,9606.ENSP00000331901,9606.ENSP00000339063,9606.ENSP00000346088,9606.ENSP00000359345,…	HNRNPL,C1QBP,EIF3K,EIF2S3,AARS1,DCPS,PML,RPS3,METAP1,PA2G4,SRP9,EEF2,HNRNPD,PKM,CALR,EEF1G,EEF1A1,RPL22,RPL5,RPS4X,EEF1B2,MTPN,GAPDH,RHOA,EEF1D,EIF4G1,RACK1
GO:0019693	Ribose phosphate metabolic process	25	419	5.96659	0.51	6.01e-05	9606.ENSP00000269848,9606.ENSP00000298556,9606.ENSP00000304229,9606.ENSP00000313490,9606.ENSP00000320171,9606.ENSP00000358547,9606.ENSP00000359991,9606.ENSP00000360124,9606.ENSP00000362413,9606.ENSP00000364802,9606.ENSP00000368605,9606.ENSP00000376886,9606.ENSP00000377192,9606.ENSP00000380070,9606.ENSP00000382595,9606.ENSP00000384330,9606.ENSP00000388183,9606.ENSP00000400175,9606.ENSP00000405573,…	PFKL,HPRT1,HINT1,PFAS,PKM,MPP1,PGAM1,PGM1,PGK1,HSPA1A,ACOT9,NME2,G6PD,GAPDH,PAICS,MYH8,OGDH,RHOA,GPI,ABHD14B,ACSL1,HSPA8,ENO2,ENO1,ALDOA
GO:0032970	Regulation of actin filament-based process	24	406	5.91133	0.51	9.72e-05	9606.ENSP00000216181,9606.ENSP00000219150,9606.ENSP00000225655,9606.ENSP00000246069,9606.ENSP00000264758,9606.ENSP00000267257,9606.ENSP00000268182,9606.ENSP00000321853,9606.ENSP00000339191,9606.ENSP00000349259,9606.ENSP00000354251,9606.ENSP00000354947,9606.ENSP00000358866,9606.ENSP00000360269,9606.ENSP00000376345,9606.ENSP00000376800,9606.ENSP00000389631,9606.ENSP00000400175,9606.ENSP00000427687,…	MYH9,CORO1A,PFN1,DSTN,ADD1,PXN,IQGAP1,SERPINF2,CAV1,SPTBN1,NCKAP1,CAPZA2,FLNA,TACSTD2,GRB2,MTPN,ARPC1B,RHOA,WDR1,CNN2,ACTG1,SPTAN1,SPTA1,SPTB
GO:0032535	Regulation of cellular component size	22	370	5.94595	0.51	0.00021	9606.ENSP00000219150,9606.ENSP00000225655,9606.ENSP00000246069,9606.ENSP00000261263,9606.ENSP00000264758,9606.ENSP00000335153,9606.ENSP00000338934,9606.ENSP00000349259,9606.ENSP00000354251,9606.ENSP00000354947,9606.ENSP00000360609,9606.ENSP00000373905,9606.ENSP00000376345,9606.ENSP00000376800,9606.ENSP00000389631,9606.ENSP00000394071,9606.ENSP00000400175,9606.ENSP00000427687,9606.ENSP00000427985,…	CORO1A,PFN1,DSTN,RAB21,ADD1,HSP90AA1,EZR,SPTBN1,NCKAP1,CAPZA2,HSP90AB1,DNM2,GRB2,MTPN,ARPC1B,GDI1,RHOA,WDR1,DPYSL2,SPTAN1,SPTA1,SPTB
GO:0051346	Negative regulation of hydrolase activity	21	354	5.9322	0.51	0.00035	9606.ENSP00000231751,9606.ENSP00000245907,9606.ENSP00000254722,9606.ENSP00000261313,9606.ENSP00000265132,9606.ENSP00000273784,9606.ENSP00000295550,9606.ENSP00000298510,9606.ENSP00000312999,9606.ENSP00000321853,9606.ENSP00000323929,9606.ENSP00000340278,9606.ENSP00000340989,9606.ENSP00000345672,9606.ENSP00000346032,9606.ENSP00000356969,9606.ENSP00000366109,9606.ENSP00000380070,9606.ENSP00000398632,…	LTF,C3,SERPINF1,PEBP1,AMBP,AHSG,COL6A3,PRDX3,GNAI2,SERPINF2,A2M,PARK7,SFN,CTSB,ANXA2,APOA2,ANXA1,GAPDH,CD44,GPI,SERPINB6
GO:2000116	Regulation of cysteine-type endopeptidase activity	14	236	5.9322	0.51	0.0079	9606.ENSP00000223136,9606.ENSP00000231751,9606.ENSP00000236671,9606.ENSP00000268058,9606.ENSP00000278572,9606.ENSP00000298510,9606.ENSP00000340019,9606.ENSP00000340278,9606.ENSP00000340989,9606.ENSP00000345347,9606.ENSP00000398632,9606.ENSP00000400175,9606.ENSP00000405573,9606.ENSP00000426909	FIS1,LTF,CTSD,PML,RPS3,PRDX3,HSPD1,PARK7,SFN,HMGB1,CD44,RHOA,GPI,RACK1
GO:0030162	Regulation of proteolysis	43	739	5.81867	0.5	5.42e-08	9606.ENSP00000216181,9606.ENSP00000216802,9606.ENSP00000221566,9606.ENSP00000223136,9606.ENSP00000229268,9606.ENSP00000231751,9606.ENSP00000236671,9606.ENSP00000245907,9606.ENSP00000253496,9606.ENSP00000254722,9606.ENSP00000261313,9606.ENSP00000264690,9606.ENSP00000265132,9606.ENSP00000268058,9606.ENSP00000273784,9606.ENSP00000278572,9606.ENSP00000295550,9606.ENSP00000298510,9606.ENSP00000308541,…	MYH9,PSME2,SGTA,FIS1,USP5,LTF,CTSD,C3,F12,SERPINF1,PEBP1,KLKB1,AMBP,PML,AHSG,RPS3,COL6A3,PRDX3,F2,SERPINF2,A2M,CAV1,HSPD1,PARK7,SFN,HMGB1,CTSB,ANXA2,RPL5,HSP90AB1,HSPA1A,GAPDH,XPO1,ALAD,CD44,RHOA,GPI,RACK1,SPON1,F8A3,SNX12,SERPINB6,ENO1
GO:0034248	Regulation of cellular amide metabolic process	30	516	5.81395	0.5	1.14e-05	9606.ENSP00000221419,9606.ENSP00000225698,9606.ENSP00000247970,9606.ENSP00000248342,9606.ENSP00000253039,9606.ENSP00000261772,9606.ENSP00000263579,9606.ENSP00000268058,9606.ENSP00000278572,9606.ENSP00000296411,9606.ENSP00000302886,9606.ENSP00000305230,9606.ENSP00000307940,9606.ENSP00000313199,9606.ENSP00000320171,9606.ENSP00000320866,9606.ENSP00000331901,9606.ENSP00000339063,9606.ENSP00000346088,…	HNRNPL,C1QBP,PIN1,EIF3K,EIF2S3,AARS1,DCPS,PML,RPS3,METAP1,PA2G4,SRP9,EEF2,HNRNPD,PKM,CALR,EEF1G,EEF1A1,RPL22,RPL5,PGAM1,RPS4X,EEF1B2,MTPN,GAPDH,RHOA,EEF1D,EIF4G1,RACK1,SPON1
GO:0032956	Regulation of actin cytoskeleton organization	21	365	5.75342	0.5	0.00051	9606.ENSP00000219150,9606.ENSP00000225655,9606.ENSP00000246069,9606.ENSP00000264758,9606.ENSP00000267257,9606.ENSP00000268182,9606.ENSP00000321853,9606.ENSP00000349259,9606.ENSP00000354251,9606.ENSP00000354947,9606.ENSP00000358866,9606.ENSP00000360269,9606.ENSP00000376345,9606.ENSP00000376800,9606.ENSP00000389631,9606.ENSP00000400175,9606.ENSP00000427687,9606.ENSP00000458162,9606.ENSP00000487444,…	CORO1A,PFN1,DSTN,ADD1,PXN,IQGAP1,SERPINF2,SPTBN1,NCKAP1,CAPZA2,FLNA,TACSTD2,GRB2,MTPN,ARPC1B,RHOA,WDR1,ACTG1,SPTAN1,SPTA1,SPTB
GO:2001233	Regulation of apoptotic signaling pathway	21	365	5.75342	0.5	0.00051	9606.ENSP00000223136,9606.ENSP00000268058,9606.ENSP00000270142,9606.ENSP00000278572,9606.ENSP00000285093,9606.ENSP00000300289,9606.ENSP00000306099,9606.ENSP00000312999,9606.ENSP00000336829,9606.ENSP00000339191,9606.ENSP00000340278,9606.ENSP00000357283,9606.ENSP00000361635,9606.ENSP00000364802,9606.ENSP00000398632,9606.ENSP00000419425,9606.ENSP00000426909,9606.ENSP00000449089,9606.ENSP00000477781,…	FIS1,PML,SOD1,RPS3,ACAA2,PDIA3,FGB,GNAI2,FGG,CAV1,PARK7,LMNA,VDAC2,HSPA1A,CD44,PPIA,RACK1,DNM1L,TPT1,ENO1,FGA
GO:0051604	Protein maturation	16	275	5.81818	0.5	0.004	9606.ENSP00000205948,9606.ENSP00000253496,9606.ENSP00000264690,9606.ENSP00000296411,9606.ENSP00000306099,9606.ENSP00000308541,9606.ENSP00000320866,9606.ENSP00000336829,9606.ENSP00000340019,9606.ENSP00000348170,9606.ENSP00000353731,9606.ENSP00000362413,9606.ENSP00000379042,9606.ENSP00000444271,9606.ENSP00000460236,9606.ENSP00000498441	APOH,F12,KLKB1,METAP1,FGB,F2,CALR,FGG,HSPD1,HP,DPP4,PGK1,ERO1A,C1R,SPON1,FGA
GO:0034249	Negative regulation of cellular amide metabolic process	11	191	5.75916	0.5	0.035	9606.ENSP00000247970,9606.ENSP00000263579,9606.ENSP00000268058,9606.ENSP00000278572,9606.ENSP00000305230,9606.ENSP00000313199,9606.ENSP00000320866,9606.ENSP00000380070,9606.ENSP00000416255,9606.ENSP00000426909,9606.ENSP00000460236	PIN1,DCPS,PML,RPS3,SRP9,HNRNPD,CALR,GAPDH,EIF4G1,RACK1,SPON1
GO:0043603	Cellular amide metabolic process	46	810	5.67901	0.49	3.29e-08	9606.ENSP00000228740,9606.ENSP00000248342,9606.ENSP00000253039,9606.ENSP00000258317,9606.ENSP00000261772,9606.ENSP00000270142,9606.ENSP00000270625,9606.ENSP00000278572,9606.ENSP00000292609,9606.ENSP00000307940,9606.ENSP00000311430,9606.ENSP00000331901,9606.ENSP00000339063,9606.ENSP00000340278,9606.ENSP00000341885,9606.ENSP00000345656,9606.ENSP00000346015,9606.ENSP00000346088,9606.ENSP00000347495,…	LTA4H,EIF3K,EIF2S3,NPL,AARS1,SOD1,RPS11,RPS3,PGLYRP2,EEF2,RPL4,EEF1G,EEF1A1,PARK7,RPS2,VAPA,RPL27A,RPL22,WARS1,DPP4,GSTM3,RPL12,CLIC2,RPL5,GLO1,RPS4X,CLIC1,RRBP1,ACOT9,EEF1B2,G6PD,FOLR1,ERO1A,RPL14,HAGH,OGDH,RPSA,EEF1D,EIF4G1,PPP2CA,CLIC3,ACSL1,RACK1,RPL30,DNPEP,RPS5
GO:0010638	Positive regulation of organelle organization	29	508	5.70866	0.49	2.15e-05	9606.ENSP00000215832,9606.ENSP00000223136,9606.ENSP00000225655,9606.ENSP00000246069,9606.ENSP00000258091,9606.ENSP00000267257,9606.ENSP00000268058,9606.ENSP00000278572,9606.ENSP00000280326,9606.ENSP00000295688,9606.ENSP00000299138,9606.ENSP00000313199,9606.ENSP00000321853,9606.ENSP00000330945,9606.ENSP00000340278,9606.ENSP00000346032,9606.ENSP00000348965,9606.ENSP00000354251,9606.ENSP00000364802,…	MAPK1,FIS1,PFN1,DSTN,CCT7,PXN,PML,RPS3,CCT5,CCT3,VPS35,HNRNPD,SERPINF2,TMED9,PARK7,ANXA2,DYNC1H1,NCKAP1,HSPA1A,ANXA1,XRCC5,GRB2,CCT4,LCP1,SEPTIN9,RHOA,PDCD6IP,WDR1,DNM1L
GO:0042176	Regulation of protein catabolic process	21	367	5.72207	0.49	0.00054	9606.ENSP00000216802,9606.ENSP00000221566,9606.ENSP00000229268,9606.ENSP00000247970,9606.ENSP00000283415,9606.ENSP00000299138,9606.ENSP00000301764,9606.ENSP00000335153,9606.ENSP00000338934,9606.ENSP00000339063,9606.ENSP00000339191,9606.ENSP00000340278,9606.ENSP00000346032,9606.ENSP00000358866,9606.ENSP00000360609,9606.ENSP00000364802,9606.ENSP00000384863,9606.ENSP00000386284,9606.ENSP00000426909,…	PSME2,SGTA,USP5,PIN1,LPCAT1,VPS35,DDB1,HSP90AA1,EZR,EEF1A1,CAV1,PARK7,ANXA2,FLNA,HSP90AB1,HSPA1A,XPO1,ALAD,RACK1,F8A3,SNX12
GO:1903050	Regulation of proteolysis involved in protein catabolic process	13	230	5.65217	0.49	0.0176	9606.ENSP00000216802,9606.ENSP00000221566,9606.ENSP00000229268,9606.ENSP00000268058,9606.ENSP00000339191,9606.ENSP00000340278,9606.ENSP00000359345,9606.ENSP00000360609,9606.ENSP00000364802,9606.ENSP00000384863,9606.ENSP00000386284,9606.ENSP00000426909,9606.ENSP00000477530	PSME2,SGTA,USP5,PML,CAV1,PARK7,RPL5,HSP90AB1,HSPA1A,XPO1,ALAD,RACK1,F8A3
GO:2001234	Negative regulation of apoptotic signaling pathway	13	230	5.65217	0.49	0.0176	9606.ENSP00000285093,9606.ENSP00000306099,9606.ENSP00000312999,9606.ENSP00000336829,9606.ENSP00000340278,9606.ENSP00000357283,9606.ENSP00000361635,9606.ENSP00000364802,9606.ENSP00000398632,9606.ENSP00000419425,9606.ENSP00000477781,9606.ENSP00000495530,9606.ENSP00000498441	ACAA2,FGB,GNAI2,FGG,PARK7,LMNA,VDAC2,HSPA1A,CD44,PPIA,TPT1,ENO1,FGA
GO:0051495	Positive regulation of cytoskeleton organization	11	195	5.64103	0.49	0.04	9606.ENSP00000225655,9606.ENSP00000246069,9606.ENSP00000267257,9606.ENSP00000278572,9606.ENSP00000321853,9606.ENSP00000348965,9606.ENSP00000354251,9606.ENSP00000364802,9606.ENSP00000376345,9606.ENSP00000400175,9606.ENSP00000427687	PFN1,DSTN,PXN,RPS3,SERPINF2,DYNC1H1,NCKAP1,HSPA1A,GRB2,RHOA,WDR1
GO:0061136	Regulation of proteasomal protein catabolic process	11	196	5.61224	0.49	0.0414	9606.ENSP00000216802,9606.ENSP00000221566,9606.ENSP00000229268,9606.ENSP00000339191,9606.ENSP00000340278,9606.ENSP00000360609,9606.ENSP00000364802,9606.ENSP00000384863,9606.ENSP00000386284,9606.ENSP00000426909,9606.ENSP00000477530	PSME2,SGTA,USP5,CAV1,PARK7,HSP90AB1,HSPA1A,XPO1,ALAD,RACK1,F8A3
GO:0090066	Regulation of anatomical structure size	28	505	5.54455	0.48	5.31e-05	9606.ENSP00000219150,9606.ENSP00000225655,9606.ENSP00000246069,9606.ENSP00000261263,9606.ENSP00000264758,9606.ENSP00000270142,9606.ENSP00000306099,9606.ENSP00000321853,9606.ENSP00000335153,9606.ENSP00000336829,9606.ENSP00000338934,9606.ENSP00000339191,9606.ENSP00000349259,9606.ENSP00000354251,9606.ENSP00000354947,9606.ENSP00000360609,9606.ENSP00000373905,9606.ENSP00000376345,9606.ENSP00000376800,…	CORO1A,PFN1,DSTN,RAB21,ADD1,SOD1,FGB,SERPINF2,HSP90AA1,FGG,EZR,CAV1,SPTBN1,NCKAP1,CAPZA2,HSP90AB1,DNM2,GRB2,MTPN,ARPC1B,GDI1,RHOA,WDR1,DPYSL2,SPTAN1,SPTA1,SPTB,FGA
GO:0009117	Nucleotide metabolic process	27	493	5.47667	0.48	8.64e-05	9606.ENSP00000269848,9606.ENSP00000298556,9606.ENSP00000304229,9606.ENSP00000313490,9606.ENSP00000320171,9606.ENSP00000340278,9606.ENSP00000358547,9606.ENSP00000359991,9606.ENSP00000360124,9606.ENSP00000362413,9606.ENSP00000364802,9606.ENSP00000368605,9606.ENSP00000376886,9606.ENSP00000378782,9606.ENSP00000380070,9606.ENSP00000382595,9606.ENSP00000384330,9606.ENSP00000388183,9606.ENSP00000400175,…	PFKL,HPRT1,HINT1,PFAS,PKM,PARK7,MPP1,PGAM1,PGM1,PGK1,HSPA1A,ACOT9,NME2,QPRT,GAPDH,PAICS,MYH8,OGDH,RHOA,GPI,ABHD14B,ACSL1,HSPA8,ENO2,SAMHD1,ENO1,ALDOA
GO:0002831	Regulation of response to biotic stimulus	20	361	5.54017	0.48	0.0012	9606.ENSP00000225698,9606.ENSP00000231751,9606.ENSP00000245907,9606.ENSP00000265983,9606.ENSP00000268058,9606.ENSP00000311747,9606.ENSP00000323929,9606.ENSP00000333298,9606.ENSP00000335153,9606.ENSP00000340019,9606.ENSP00000345347,9606.ENSP00000353099,9606.ENSP00000356399,9606.ENSP00000369677,9606.ENSP00000375978,9606.ENSP00000377148,9606.ENSP00000385519,9606.ENSP00000433760,9606.ENSP00000493536,…	C1QBP,LTF,C3,HPX,PML,RBM14,A2M,LAMP1,HSP90AA1,HSPD1,HMGB1,HLA-DRB1,CFH,EMILIN1,XRCC5,AP1G1,CD14,BANF1,SAMHD1,STING1
GO:1901215	Negative regulation of neuron death	12	219	5.47945	0.48	0.0326	9606.ENSP00000219150,9606.ENSP00000254722,9606.ENSP00000261772,9606.ENSP00000270142,9606.ENSP00000299138,9606.ENSP00000340278,9606.ENSP00000360609,9606.ENSP00000400175,9606.ENSP00000405573,9606.ENSP00000416255,9606.ENSP00000426909,9606.ENSP00000437402	CORO1A,SERPINF1,AARS1,SOD1,VPS35,PARK7,HSP90AB1,RHOA,GPI,EIF4G1,RACK1,ENO2
GO:0043393	Regulation of protein binding	11	201	5.47264	0.48	0.0482	9606.ENSP00000247970,9606.ENSP00000264758,9606.ENSP00000339191,9606.ENSP00000340278,9606.ENSP00000346032,9606.ENSP00000360609,9606.ENSP00000418447,9606.ENSP00000426909,9606.ENSP00000460236,9606.ENSP00000495214,9606.ENSP00000498596	PIN1,ADD1,CAV1,PARK7,ANXA2,HSP90AB1,PPP2CA,RACK1,SPON1,SPTA1,STING1
GO:0032787	Monocarboxylic acid metabolic process	27	502	5.37849	0.47	0.00011	9606.ENSP00000221418,9606.ENSP00000245907,9606.ENSP00000269848,9606.ENSP00000285093,9606.ENSP00000285930,9606.ENSP00000304592,9606.ENSP00000306606,9606.ENSP00000313432,9606.ENSP00000320171,9606.ENSP00000325136,9606.ENSP00000340278,9606.ENSP00000359991,9606.ENSP00000360124,9606.ENSP00000362413,9606.ENSP00000370023,9606.ENSP00000370254,9606.ENSP00000380070,9606.ENSP00000380514,9606.ENSP00000388183,…	ECH1,C3,PFKL,ACAA2,AKR1B1,FASN,ADH1B,GRHPR,PKM,HADHB,PARK7,PGAM1,PGM1,PGK1,HADHA,AKR1C1,GAPDH,HAGH,OGDH,GPI,ACSL1,ENO2,EPHX1,PTGES3,PHGDH,ENO1,ALDOA
GO:0051223	Regulation of protein transport	27	503	5.36779	0.47	0.00012	9606.ENSP00000223136,9606.ENSP00000261574,9606.ENSP00000269848,9606.ENSP00000277865,9606.ENSP00000286713,9606.ENSP00000299138,9606.ENSP00000306099,9606.ENSP00000335153,9606.ENSP00000336829,9606.ENSP00000338934,9606.ENSP00000340278,9606.ENSP00000340989,9606.ENSP00000353099,9606.ENSP00000358081,9606.ENSP00000358866,9606.ENSP00000360609,9606.ENSP00000363641,9606.ENSP00000381581,9606.ENSP00000384863,…	FIS1,IPO5,PFKL,GLUD1,STOM,VPS35,FGB,HSP90AA1,FGG,EZR,PARK7,SFN,HLA-DRB1,BAG3,FLNA,HSP90AB1,TXN,LCP1,XPO1,GDI1,PPIA,RACK1,HSPA8,DNM1L,SNX12,MYO1C,FGA
GO:0032102	Negative regulation of response to external stimulus	21	387	5.42636	0.47	0.0011	9606.ENSP00000205948,9606.ENSP00000225698,9606.ENSP00000231751,9606.ENSP00000253496,9606.ENSP00000254722,9606.ENSP00000264690,9606.ENSP00000270142,9606.ENSP00000299138,9606.ENSP00000306099,9606.ENSP00000308541,9606.ENSP00000321853,9606.ENSP00000323929,9606.ENSP00000336829,9606.ENSP00000346032,9606.ENSP00000353099,9606.ENSP00000353731,9606.ENSP00000381386,9606.ENSP00000433760,9606.ENSP00000484472,…	APOH,C1QBP,LTF,F12,SERPINF1,KLKB1,SOD1,VPS35,FGB,F2,SERPINF2,A2M,FGG,ANXA2,HLA-DRB1,DPP4,DDT,BANF1,EPPK1,SAMHD1,FGA
GO:0045088	Regulation of innate immune response	13	238	5.46218	0.47	0.0224	9606.ENSP00000245907,9606.ENSP00000265983,9606.ENSP00000311747,9606.ENSP00000323929,9606.ENSP00000333298,9606.ENSP00000335153,9606.ENSP00000345347,9606.ENSP00000356399,9606.ENSP00000375978,9606.ENSP00000377148,9606.ENSP00000433760,9606.ENSP00000493536,9606.ENSP00000498596	C3,HPX,RBM14,A2M,LAMP1,HSP90AA1,HMGB1,CFH,XRCC5,AP1G1,BANF1,SAMHD1,STING1
GO:0010608	Post-transcriptional regulation of gene expression	29	546	5.31136	0.46	6.72e-05	9606.ENSP00000216714,9606.ENSP00000221419,9606.ENSP00000225698,9606.ENSP00000248342,9606.ENSP00000253039,9606.ENSP00000261772,9606.ENSP00000263579,9606.ENSP00000268058,9606.ENSP00000278572,9606.ENSP00000296411,9606.ENSP00000302886,9606.ENSP00000305230,9606.ENSP00000307940,9606.ENSP00000313199,9606.ENSP00000320171,9606.ENSP00000320866,9606.ENSP00000331901,9606.ENSP00000339063,9606.ENSP00000339191,…	APEX1,HNRNPL,C1QBP,EIF3K,EIF2S3,AARS1,DCPS,PML,RPS3,METAP1,PA2G4,SRP9,EEF2,HNRNPD,PKM,CALR,EEF1G,EEF1A1,CAV1,RPL22,RPL5,RPS4X,EEF1B2,MTPN,GAPDH,RHOA,EEF1D,EIF4G1,RACK1
GO:0060627	Regulation of vesicle-mediated transport	29	551	5.26316	0.46	7.57e-05	9606.ENSP00000215832,9606.ENSP00000219150,9606.ENSP00000245907,9606.ENSP00000261263,9606.ENSP00000270142,9606.ENSP00000273784,9606.ENSP00000303366,9606.ENSP00000306099,9606.ENSP00000312999,9606.ENSP00000320866,9606.ENSP00000333298,9606.ENSP00000336829,9606.ENSP00000338934,9606.ENSP00000339191,9606.ENSP00000345347,9606.ENSP00000346032,9606.ENSP00000356969,9606.ENSP00000366109,9606.ENSP00000373905,…	MAPK1,CORO1A,C3,RAB21,SOD1,AHSG,LMAN2,FGB,GNAI2,CALR,LAMP1,FGG,EZR,CAV1,HMGB1,ANXA2,APOA2,ANXA1,DNM2,AP1G1,CD14,TF,PDCD6IP,CFB,RACK1,CNN2,SEPTIN2,SNX12,FGA
GO:2000146	Negative regulation of cell motility	16	304	5.26316	0.46	0.0099	9606.ENSP00000205948,9606.ENSP00000216714,9606.ENSP00000247970,9606.ENSP00000254722,9606.ENSP00000319096,9606.ENSP00000320866,9606.ENSP00000345347,9606.ENSP00000353731,9606.ENSP00000355771,9606.ENSP00000360269,9606.ENSP00000363500,9606.ENSP00000369677,9606.ENSP00000381386,9606.ENSP00000400175,9606.ENSP00000456436,9606.ENSP00000484472	APOH,APEX1,PIN1,SERPINF1,RAP2B,CALR,HMGB1,DPP4,AFDN,TACSTD2,CLIC4,EMILIN1,DDT,RHOA,CNN2,EPPK1
GO:0030099	Myeloid cell differentiation	14	263	5.32319	0.46	0.0188	9606.ENSP00000216181,9606.ENSP00000222219,9606.ENSP00000262418,9606.ENSP00000268058,9606.ENSP00000298510,9606.ENSP00000304592,9606.ENSP00000346032,9606.ENSP00000353099,9606.ENSP00000358866,9606.ENSP00000362463,9606.ENSP00000377192,9606.ENSP00000377941,9606.ENSP00000385834,9606.ENSP00000427687	MYH9,DNASE2,SLC4A1,PML,PRDX3,FASN,ANXA2,HLA-DRB1,FLNA,GLO1,G6PD,ACTN1,TF,WDR1
GO:0033673	Negative regulation of kinase activity	12	229	5.24017	0.46	0.0437	9606.ENSP00000261574,9606.ENSP00000298510,9606.ENSP00000306330,9606.ENSP00000323856,9606.ENSP00000339191,9606.ENSP00000340278,9606.ENSP00000340989,9606.ENSP00000347495,9606.ENSP00000369042,9606.ENSP00000378760,9606.ENSP00000419425,9606.ENSP00000426909	IPO5,PRDX3,YWHAG,PLEC,CAV1,PARK7,SFN,WARS1,IPO7,MVP,PPIA,RACK1
GO:0051248	Negative regulation of protein metabolic process	54	1038	5.20231	0.45	1.72e-08	9606.ENSP00000221566,9606.ENSP00000231751,9606.ENSP00000245907,9606.ENSP00000247970,9606.ENSP00000254722,9606.ENSP00000261313,9606.ENSP00000261574,9606.ENSP00000263579,9606.ENSP00000265132,9606.ENSP00000268058,9606.ENSP00000273784,9606.ENSP00000278572,9606.ENSP00000282541,9606.ENSP00000295550,9606.ENSP00000298510,9606.ENSP00000299138,9606.ENSP00000305230,9606.ENSP00000306330,9606.ENSP00000308541,…	SGTA,LTF,C3,PIN1,SERPINF1,PEBP1,IPO5,DCPS,AMBP,PML,AHSG,RPS3,GPD1L,COL6A3,PRDX3,VPS35,SRP9,YWHAG,F2,GNAI2,HNRNPD,CALR,SERPINF2,PLEC,A2M,CAV1,PARK7,SFN,CTSB,ANXA2,CRKL,WARS1,FLNA,RPL5,HSP90AB1,HSPG2,HSPA1A,IPO7,EMILIN1,G6PD,MVP,GAPDH,ALAD,CD44,GPI,EIF4G1,PPP2CA,PPIA,RACK1,SPON1,F8A3,SNX12,SERPINB6,FGA
GO:0060341	Regulation of cellular localization	50	963	5.19211	0.45	5.57e-08	9606.ENSP00000215832,9606.ENSP00000223136,9606.ENSP00000236671,9606.ENSP00000247970,9606.ENSP00000258091,9606.ENSP00000261263,9606.ENSP00000261574,9606.ENSP00000268058,9606.ENSP00000269848,9606.ENSP00000277865,9606.ENSP00000280326,9606.ENSP00000282541,9606.ENSP00000286713,9606.ENSP00000295688,9606.ENSP00000299138,9606.ENSP00000306099,9606.ENSP00000308541,9606.ENSP00000333298,9606.ENSP00000335153,…	MAPK1,FIS1,CTSD,PIN1,CCT7,RAB21,IPO5,PML,PFKL,GLUD1,CCT5,GPD1L,STOM,CCT3,VPS35,FGB,F2,LAMP1,HSP90AA1,FGG,EZR,CAV1,PARK7,SFN,ANXA2,CRKL,DYNC1H1,SPTBN1,HLA-DRB1,AFDN,EPB41L2,LMNA,BAG3,FLNA,HSP90AB1,TXN,GDI2,CCT4,ITGB1,LCP1,XPO1,GDI1,PPIA,RACK1,HSPA8,DNM1L,CLTC,SNX12,MYO1C,FGA
GO:0032880	Regulation of protein localization	44	852	5.16432	0.45	5.73e-07	9606.ENSP00000223136,9606.ENSP00000236671,9606.ENSP00000247970,9606.ENSP00000258091,9606.ENSP00000261574,9606.ENSP00000268058,9606.ENSP00000269848,9606.ENSP00000277865,9606.ENSP00000280326,9606.ENSP00000282541,9606.ENSP00000286713,9606.ENSP00000295688,9606.ENSP00000299138,9606.ENSP00000306099,9606.ENSP00000308541,9606.ENSP00000335153,9606.ENSP00000336829,9606.ENSP00000338934,9606.ENSP00000340278,…	FIS1,CTSD,PIN1,CCT7,IPO5,PML,PFKL,GLUD1,CCT5,GPD1L,STOM,CCT3,VPS35,FGB,F2,HSP90AA1,FGG,EZR,PARK7,SFN,CRKL,SPTBN1,HLA-DRB1,AFDN,EPB41L2,LMNA,BAG3,FLNA,HSP90AB1,TXN,GDI2,CCT4,ITGB1,LCP1,XPO1,GDI1,PPIA,RACK1,HSPA8,DNM1L,CLTC,SNX12,MYO1C,FGA
GO:0043604	Amide biosynthetic process	28	536	5.22388	0.45	0.00012	9606.ENSP00000248342,9606.ENSP00000253039,9606.ENSP00000261772,9606.ENSP00000270625,9606.ENSP00000278572,9606.ENSP00000307940,9606.ENSP00000311430,9606.ENSP00000331901,9606.ENSP00000339063,9606.ENSP00000341885,9606.ENSP00000345656,9606.ENSP00000346015,9606.ENSP00000346088,9606.ENSP00000347495,9606.ENSP00000354739,9606.ENSP00000359345,9606.ENSP00000362744,9606.ENSP00000367038,9606.ENSP00000376055,…	EIF3K,EIF2S3,AARS1,RPS11,RPS3,EEF2,RPL4,EEF1G,EEF1A1,RPS2,VAPA,RPL27A,RPL22,WARS1,RPL12,RPL5,RPS4X,RRBP1,EEF1B2,RPL14,HAGH,RPSA,EEF1D,EIF4G1,ACSL1,RACK1,RPL30,RPS5
GO:0055086	Nucleobase-containing small molecule metabolic process	29	567	5.11464	0.45	0.00012	9606.ENSP00000215832,9606.ENSP00000269848,9606.ENSP00000298556,9606.ENSP00000304229,9606.ENSP00000309092,9606.ENSP00000313490,9606.ENSP00000320171,9606.ENSP00000340278,9606.ENSP00000358547,9606.ENSP00000359991,9606.ENSP00000360124,9606.ENSP00000362413,9606.ENSP00000364802,9606.ENSP00000368605,9606.ENSP00000376886,9606.ENSP00000378782,9606.ENSP00000380070,9606.ENSP00000382595,9606.ENSP00000384330,…	MAPK1,PFKL,HPRT1,HINT1,GMPPB,PFAS,PKM,PARK7,MPP1,PGAM1,PGM1,PGK1,HSPA1A,ACOT9,NME2,QPRT,GAPDH,PAICS,MYH8,OGDH,RHOA,GPI,ABHD14B,ACSL1,HSPA8,ENO2,SAMHD1,ENO1,ALDOA
GO:0051493	Regulation of cytoskeleton organization	28	541	5.1756	0.45	0.00014	9606.ENSP00000215832,9606.ENSP00000219150,9606.ENSP00000225655,9606.ENSP00000246069,9606.ENSP00000264758,9606.ENSP00000267257,9606.ENSP00000268182,9606.ENSP00000278572,9606.ENSP00000311747,9606.ENSP00000321853,9606.ENSP00000348965,9606.ENSP00000349259,9606.ENSP00000354251,9606.ENSP00000354947,9606.ENSP00000358866,9606.ENSP00000360269,9606.ENSP00000363500,9606.ENSP00000364802,9606.ENSP00000376345,…	MAPK1,CORO1A,PFN1,DSTN,ADD1,PXN,IQGAP1,RPS3,RBM14,SERPINF2,DYNC1H1,SPTBN1,NCKAP1,CAPZA2,FLNA,TACSTD2,CLIC4,HSPA1A,GRB2,MTPN,ARPC1B,RHOA,WDR1,ACTG1,CLTC,SPTAN1,SPTA1,SPTB
GO:0045936	Negative regulation of phosphate metabolic process	22	424	5.18868	0.45	0.0013	9606.ENSP00000223136,9606.ENSP00000261574,9606.ENSP00000262418,9606.ENSP00000268182,9606.ENSP00000282541,9606.ENSP00000283415,9606.ENSP00000298510,9606.ENSP00000306330,9606.ENSP00000312999,9606.ENSP00000323856,9606.ENSP00000339191,9606.ENSP00000340278,9606.ENSP00000340989,9606.ENSP00000346300,9606.ENSP00000347495,9606.ENSP00000369042,9606.ENSP00000369677,9606.ENSP00000378760,9606.ENSP00000416255,…	FIS1,IPO5,SLC4A1,IQGAP1,GPD1L,LPCAT1,PRDX3,YWHAG,GNAI2,PLEC,CAV1,PARK7,SFN,CRKL,WARS1,IPO7,EMILIN1,MVP,EIF4G1,PPP2CA,PPIA,RACK1
GO:0044282	Small molecule catabolic process	19	369	5.14905	0.45	0.0041	9606.ENSP00000221418,9606.ENSP00000245206,9606.ENSP00000258317,9606.ENSP00000261733,9606.ENSP00000269848,9606.ENSP00000277865,9606.ENSP00000285093,9606.ENSP00000320171,9606.ENSP00000325136,9606.ENSP00000340278,9606.ENSP00000362413,9606.ENSP00000363614,9606.ENSP00000367992,9606.ENSP00000370023,9606.ENSP00000378782,9606.ENSP00000380514,9606.ENSP00000411719,9606.ENSP00000437402,9606.ENSP00000495530	ECH1,GOT2,NPL,ALDH2,PFKL,GLUD1,ACAA2,PKM,HADHB,PARK7,PGK1,HMGCL,ESD,HADHA,QPRT,HAGH,MPST,ENO2,ENO1
GO:0010639	Negative regulation of organelle organization	18	351	5.12821	0.45	0.0061	9606.ENSP00000219150,9606.ENSP00000225655,9606.ENSP00000254810,9606.ENSP00000264758,9606.ENSP00000268058,9606.ENSP00000285093,9606.ENSP00000311747,9606.ENSP00000349259,9606.ENSP00000353375,9606.ENSP00000354947,9606.ENSP00000357283,9606.ENSP00000360269,9606.ENSP00000364802,9606.ENSP00000369538,9606.ENSP00000373905,9606.ENSP00000487444,9606.ENSP00000495214,9606.ENSP00000495909	CORO1A,PFN1,H3-3B,ADD1,PML,ACAA2,RBM14,SPTBN1,MAP4,CAPZA2,LMNA,TACSTD2,HSPA1A,GDI2,DNM2,SPTAN1,SPTA1,SPTB
GO:0009895	Negative regulation of catabolic process	17	329	5.16717	0.45	0.0081	9606.ENSP00000221566,9606.ENSP00000247970,9606.ENSP00000262418,9606.ENSP00000268058,9606.ENSP00000299138,9606.ENSP00000313199,9606.ENSP00000340278,9606.ENSP00000346032,9606.ENSP00000348170,9606.ENSP00000356969,9606.ENSP00000358866,9606.ENSP00000359345,9606.ENSP00000360609,9606.ENSP00000386284,9606.ENSP00000416255,9606.ENSP00000477530,9606.ENSP00000481314	SGTA,PIN1,SLC4A1,PML,VPS35,HNRNPD,PARK7,ANXA2,HP,APOA2,FLNA,RPL5,HSP90AB1,ALAD,EIF4G1,F8A3,SNX12
GO:0030336	Negative regulation of cell migration	15	288	5.20833	0.45	0.0156	9606.ENSP00000205948,9606.ENSP00000216714,9606.ENSP00000254722,9606.ENSP00000319096,9606.ENSP00000320866,9606.ENSP00000345347,9606.ENSP00000353731,9606.ENSP00000355771,9606.ENSP00000360269,9606.ENSP00000363500,9606.ENSP00000369677,9606.ENSP00000381386,9606.ENSP00000400175,9606.ENSP00000456436,9606.ENSP00000484472	APOH,APEX1,SERPINF1,RAP2B,CALR,HMGB1,DPP4,AFDN,TACSTD2,CLIC4,EMILIN1,DDT,RHOA,CNN2,EPPK1
GO:0002253	Activation of immune response	14	271	5.16605	0.45	0.0236	9606.ENSP00000215832,9606.ENSP00000225698,9606.ENSP00000245907,9606.ENSP00000263408,9606.ENSP00000311747,9606.ENSP00000335153,9606.ENSP00000345347,9606.ENSP00000346300,9606.ENSP00000353099,9606.ENSP00000356399,9606.ENSP00000375978,9606.ENSP00000416561,9606.ENSP00000444271,9606.ENSP00000498596	MAPK1,C1QBP,C3,C9,RBM14,HSP90AA1,HMGB1,CRKL,HLA-DRB1,CFH,XRCC5,CFB,C1R,STING1
GO:0051348	Negative regulation of transferase activity	14	274	5.10949	0.45	0.0259	9606.ENSP00000261574,9606.ENSP00000268058,9606.ENSP00000298510,9606.ENSP00000306330,9606.ENSP00000323856,9606.ENSP00000339191,9606.ENSP00000340278,9606.ENSP00000340989,9606.ENSP00000347495,9606.ENSP00000359345,9606.ENSP00000369042,9606.ENSP00000378760,9606.ENSP00000419425,9606.ENSP00000426909	IPO5,PML,PRDX3,YWHAG,PLEC,CAV1,PARK7,SFN,WARS1,RPL5,IPO7,MVP,PPIA,RACK1
GO:0051050	Positive regulation of transport	46	915	5.02732	0.44	5.45e-07	9606.ENSP00000223136,9606.ENSP00000245907,9606.ENSP00000252699,9606.ENSP00000261263,9606.ENSP00000261574,9606.ENSP00000270142,9606.ENSP00000273784,9606.ENSP00000277865,9606.ENSP00000282541,9606.ENSP00000286713,9606.ENSP00000299138,9606.ENSP00000303366,9606.ENSP00000306099,9606.ENSP00000308541,9606.ENSP00000312999,9606.ENSP00000320866,9606.ENSP00000333298,9606.ENSP00000335153,9606.ENSP00000336829,…	FIS1,C3,ACTN4,RAB21,IPO5,SOD1,AHSG,GLUD1,GPD1L,STOM,VPS35,LMAN2,FGB,F2,GNAI2,CALR,LAMP1,HSP90AA1,FGG,EZR,CAV1,NDUFA4,PARK7,SFN,ANXA2,DYNC1H1,HLA-DRB1,APOA2,BAG3,FLNA,HSP90AB1,ANXA1,DNM2,AP1G1,G6PD,ITGB1,CD14,TF,PDCD6IP,CFB,PPIA,ACSL1,RACK1,DNM1L,MYO1C,FGA
GO:0043436	Oxoacid metabolic process	43	846	5.08274	0.44	1.09e-06	9606.ENSP00000221418,9606.ENSP00000225275,9606.ENSP00000228740,9606.ENSP00000245206,9606.ENSP00000245907,9606.ENSP00000258317,9606.ENSP00000261772,9606.ENSP00000269848,9606.ENSP00000277865,9606.ENSP00000285093,9606.ENSP00000285930,9606.ENSP00000304592,9606.ENSP00000306606,9606.ENSP00000313432,9606.ENSP00000313490,9606.ENSP00000320171,9606.ENSP00000325136,9606.ENSP00000327070,9606.ENSP00000340278,…	ECH1,MPO,LTA4H,GOT2,C3,NPL,AARS1,PFKL,GLUD1,ACAA2,AKR1B1,FASN,ADH1B,GRHPR,PFAS,PKM,HADHB,MDH2,PARK7,WARS1,MGST3,PGAM1,PGM1,PGK1,HMGCL,HADHA,AKR1C1,FOLR1,NIT2,QPRT,GAPDH,HAGH,OGDH,GPI,MPST,ABHD14B,ACSL1,ENO2,EPHX1,PTGES3,PHGDH,ENO1,ALDOA
GO:0019752	Carboxylic acid metabolic process	41	819	5.00611	0.44	2.94e-06	9606.ENSP00000221418,9606.ENSP00000228740,9606.ENSP00000245206,9606.ENSP00000245907,9606.ENSP00000258317,9606.ENSP00000261772,9606.ENSP00000269848,9606.ENSP00000277865,9606.ENSP00000285093,9606.ENSP00000285930,9606.ENSP00000304592,9606.ENSP00000306606,9606.ENSP00000313432,9606.ENSP00000313490,9606.ENSP00000320171,9606.ENSP00000325136,9606.ENSP00000327070,9606.ENSP00000340278,9606.ENSP00000347495,…	ECH1,LTA4H,GOT2,C3,NPL,AARS1,PFKL,GLUD1,ACAA2,AKR1B1,FASN,ADH1B,GRHPR,PFAS,PKM,HADHB,MDH2,PARK7,WARS1,MGST3,PGAM1,PGM1,PGK1,HMGCL,HADHA,AKR1C1,FOLR1,NIT2,QPRT,GAPDH,HAGH,OGDH,GPI,MPST,ACSL1,ENO2,EPHX1,PTGES3,PHGDH,ENO1,ALDOA
GO:0097435	Supramolecular fiber organization	29	570	5.08772	0.44	0.00013	9606.ENSP00000219150,9606.ENSP00000246069,9606.ENSP00000264758,9606.ENSP00000321853,9606.ENSP00000323856,9606.ENSP00000324422,9606.ENSP00000338934,9606.ENSP00000346032,9606.ENSP00000348163,9606.ENSP00000348965,9606.ENSP00000358866,9606.ENSP00000360305,9606.ENSP00000360609,9606.ENSP00000369677,9606.ENSP00000377941,9606.ENSP00000379350,9606.ENSP00000379616,9606.ENSP00000381581,9606.ENSP00000385834,…	CORO1A,DSTN,ADD1,SERPINF2,PLEC,ZYX,EZR,ANXA2,PLS3,DYNC1H1,FLNA,PDLIM1,HSP90AB1,EMILIN1,ACTN1,ITGB1,MYH11,LCP1,TF,ARPC1B,RHOA,WDR1,ACTG1,EPPK1,SPTA1,ALDOA,TPM2,MYO1C,TPM3
GO:0045862	Positive regulation of proteolysis	19	375	5.06667	0.44	0.0049	9606.ENSP00000216181,9606.ENSP00000216802,9606.ENSP00000221566,9606.ENSP00000223136,9606.ENSP00000229268,9606.ENSP00000236671,9606.ENSP00000253496,9606.ENSP00000264690,9606.ENSP00000268058,9606.ENSP00000278572,9606.ENSP00000339191,9606.ENSP00000340019,9606.ENSP00000345347,9606.ENSP00000346032,9606.ENSP00000364802,9606.ENSP00000400175,9606.ENSP00000426909,9606.ENSP00000460236,9606.ENSP00000495530	MYH9,PSME2,SGTA,FIS1,USP5,CTSD,F12,KLKB1,PML,RPS3,CAV1,HSPD1,HMGB1,ANXA2,HSPA1A,RHOA,RACK1,SPON1,ENO1
GO:0006790	Sulfur compound metabolic process	17	336	5.05952	0.44	0.0099	9606.ENSP00000270142,9606.ENSP00000327336,9606.ENSP00000331901,9606.ENSP00000340278,9606.ENSP00000354357,9606.ENSP00000358460,9606.ENSP00000362463,9606.ENSP00000364935,9606.ENSP00000368605,9606.ENSP00000377192,9606.ENSP00000380514,9606.ENSP00000388183,9606.ENSP00000411719,9606.ENSP00000419378,9606.ENSP00000420065,9606.ENSP00000422607,9606.ENSP00000493382	SOD1,BGN,EEF1G,PARK7,GSTM3,CLIC2,GLO1,CLIC1,ACOT9,G6PD,HAGH,OGDH,MPST,CLIC3,ABHD14B,ACSL1,PHGDH
GO:0140694	Non-membrane-bounded organelle assembly	16	314	5.09554	0.44	0.0133	9606.ENSP00000225698,9606.ENSP00000278572,9606.ENSP00000311747,9606.ENSP00000323856,9606.ENSP00000338934,9606.ENSP00000348965,9606.ENSP00000358866,9606.ENSP00000359345,9606.ENSP00000375978,9606.ENSP00000379350,9606.ENSP00000379616,9606.ENSP00000389351,9606.ENSP00000400175,9606.ENSP00000427687,9606.ENSP00000458162,9606.ENSP00000472985	C1QBP,RPS3,RBM14,PLEC,EZR,DYNC1H1,FLNA,RPL5,XRCC5,ITGB1,MYH11,RPSA,RHOA,WDR1,ACTG1,RPS5
GO:0001666	Response to hypoxia	14	278	5.03597	0.44	0.0285	9606.ENSP00000241052,9606.ENSP00000247970,9606.ENSP00000252699,9606.ENSP00000268058,9606.ENSP00000285093,9606.ENSP00000297991,9606.ENSP00000339191,9606.ENSP00000353731,9606.ENSP00000357283,9606.ENSP00000360305,9606.ENSP00000362413,9606.ENSP00000379042,9606.ENSP00000386284,9606.ENSP00000400175	CAT,PIN1,ACTN4,PML,ACAA2,AQP3,CAV1,DPP4,LMNA,PDLIM1,PGK1,ERO1A,ALAD,RHOA
GO:0043086	Negative regulation of catalytic activity	38	771	4.92866	0.43	1.18e-05	9606.ENSP00000231751,9606.ENSP00000245907,9606.ENSP00000254722,9606.ENSP00000261313,9606.ENSP00000261574,9606.ENSP00000262418,9606.ENSP00000264908,9606.ENSP00000265132,9606.ENSP00000268058,9606.ENSP00000268182,9606.ENSP00000273784,9606.ENSP00000295550,9606.ENSP00000298510,9606.ENSP00000306330,9606.ENSP00000312999,9606.ENSP00000321853,9606.ENSP00000323856,9606.ENSP00000323929,9606.ENSP00000339191,…	LTF,C3,SERPINF1,PEBP1,IPO5,SLC4A1,ANXA3,AMBP,PML,IQGAP1,AHSG,COL6A3,PRDX3,YWHAG,GNAI2,SERPINF2,PLEC,A2M,CAV1,PARK7,SFN,CTSB,ANXA2,WARS1,HP,APOA2,RPL5,ANXA1,IPO7,MVP,GAPDH,CD44,GPI,PPIA,RACK1,RNH1,CAND1,SERPINB6
GO:0006897	Endocytosis	22	447	4.9217	0.43	0.0024	9606.ENSP00000215832,9606.ENSP00000216181,9606.ENSP00000269886,9606.ENSP00000273784,9606.ENSP00000298223,9606.ENSP00000309415,9606.ENSP00000338934,9606.ENSP00000339191,9606.ENSP00000353731,9606.ENSP00000361883,9606.ENSP00000363827,9606.ENSP00000373905,9606.ENSP00000376345,9606.ENSP00000377148,9606.ENSP00000377284,9606.ENSP00000379350,9606.ENSP00000385519,9606.ENSP00000427985,9606.ENSP00000449089,…	MAPK1,MYH9,SH3GL1,AHSG,FOLR2,CLTB,EZR,CAV1,DPP4,CAP1,HSPG2,DNM2,GRB2,AP1G1,FOLR1,ITGB1,CD14,DPYSL2,DNM1L,ACTG1,CLTC,AP2B1
GO:0042326	Negative regulation of phosphorylation	18	368	4.8913	0.43	0.0097	9606.ENSP00000261574,9606.ENSP00000262418,9606.ENSP00000282541,9606.ENSP00000298510,9606.ENSP00000306330,9606.ENSP00000323856,9606.ENSP00000339191,9606.ENSP00000340278,9606.ENSP00000340989,9606.ENSP00000346300,9606.ENSP00000347495,9606.ENSP00000369042,9606.ENSP00000369677,9606.ENSP00000378760,9606.ENSP00000416255,9606.ENSP00000418447,9606.ENSP00000419425,9606.ENSP00000426909	IPO5,SLC4A1,GPD1L,PRDX3,YWHAG,PLEC,CAV1,PARK7,SFN,CRKL,WARS1,IPO7,EMILIN1,MVP,EIF4G1,PPP2CA,PPIA,RACK1
GO:0022409	Positive regulation of cell-cell adhesion	16	322	4.96894	0.43	0.0164	9606.ENSP00000219150,9606.ENSP00000278572,9606.ENSP00000306099,9606.ENSP00000321853,9606.ENSP00000336829,9606.ENSP00000339191,9606.ENSP00000340019,9606.ENSP00000345347,9606.ENSP00000353099,9606.ENSP00000353731,9606.ENSP00000355771,9606.ENSP00000366109,9606.ENSP00000398632,9606.ENSP00000400175,9606.ENSP00000495214,9606.ENSP00000498441	CORO1A,RPS3,FGB,SERPINF2,FGG,CAV1,HSPD1,HMGB1,HLA-DRB1,DPP4,AFDN,ANXA1,CD44,RHOA,SPTA1,FGA
GO:0001933	Negative regulation of protein phosphorylation	16	326	4.90798	0.43	0.0181	9606.ENSP00000261574,9606.ENSP00000282541,9606.ENSP00000306330,9606.ENSP00000323856,9606.ENSP00000339191,9606.ENSP00000340278,9606.ENSP00000340989,9606.ENSP00000346300,9606.ENSP00000347495,9606.ENSP00000369042,9606.ENSP00000369677,9606.ENSP00000378760,9606.ENSP00000416255,9606.ENSP00000418447,9606.ENSP00000419425,9606.ENSP00000426909	IPO5,GPD1L,YWHAG,PLEC,CAV1,PARK7,SFN,CRKL,WARS1,IPO7,EMILIN1,MVP,EIF4G1,PPP2CA,PPIA,RACK1
GO:0010720	Positive regulation of cell development	15	304	4.93421	0.43	0.0241	9606.ENSP00000225698,9606.ENSP00000254722,9606.ENSP00000261263,9606.ENSP00000264758,9606.ENSP00000306099,9606.ENSP00000320866,9606.ENSP00000336829,9606.ENSP00000337598,9606.ENSP00000346300,9606.ENSP00000358866,9606.ENSP00000373905,9606.ENSP00000375978,9606.ENSP00000379350,9606.ENSP00000394071,9606.ENSP00000498441	C1QBP,SERPINF1,RAB21,ADD1,FGB,CALR,FGG,LIMS1,CRKL,FLNA,DNM2,XRCC5,ITGB1,GDI1,FGA
GO:0001818	Negative regulation of cytokine production	14	284	4.92958	0.43	0.0339	9606.ENSP00000225371,9606.ENSP00000225698,9606.ENSP00000231751,9606.ENSP00000259396,9606.ENSP00000268058,9606.ENSP00000292609,9606.ENSP00000308541,9606.ENSP00000338934,9606.ENSP00000345347,9606.ENSP00000353099,9606.ENSP00000356969,9606.ENSP00000360609,9606.ENSP00000366109,9606.ENSP00000433760	EPX,C1QBP,LTF,ORM1,PML,PGLYRP2,F2,EZR,HMGB1,HLA-DRB1,APOA2,HSP90AB1,ANXA1,BANF1
GO:0048545	Response to steroid hormone	14	285	4.91228	0.43	0.0346	9606.ENSP00000254722,9606.ENSP00000264908,9606.ENSP00000320866,9606.ENSP00000323929,9606.ENSP00000328359,9606.ENSP00000339191,9606.ENSP00000356969,9606.ENSP00000364802,9606.ENSP00000366109,9606.ENSP00000386284,9606.ENSP00000400175,9606.ENSP00000405573,9606.ENSP00000437125,9606.ENSP00000482075	SERPINF1,ANXA3,CALR,A2M,DEFA3,CAV1,APOA2,HSPA1A,ANXA1,ALAD,RHOA,GPI,HSPA8,PTGES3
GO:0032101	Regulation of response to external stimulus	46	964	4.77178	0.42	1.74e-06	9606.ENSP00000205948,9606.ENSP00000215832,9606.ENSP00000225698,9606.ENSP00000231751,9606.ENSP00000245907,9606.ENSP00000253496,9606.ENSP00000254722,9606.ENSP00000264690,9606.ENSP00000265983,9606.ENSP00000268058,9606.ENSP00000270142,9606.ENSP00000273784,9606.ENSP00000292609,9606.ENSP00000299138,9606.ENSP00000306099,9606.ENSP00000308541,9606.ENSP00000311747,9606.ENSP00000320866,9606.ENSP00000321853,…	APOH,MAPK1,C1QBP,LTF,C3,F12,SERPINF1,KLKB1,HPX,PML,SOD1,AHSG,PGLYRP2,VPS35,FGB,F2,RBM14,CALR,SERPINF2,A2M,ZYX,FBN1,LAMP1,HSP90AA1,FGG,CAV1,PARK7,HMGB1,ANXA2,HLA-DRB1,DPP4,CFH,MPP1,FLNA,ANXA1,EMILIN1,XRCC5,AP1G1,DDT,CD14,BANF1,DNM1L,EPPK1,SAMHD1,FGA,STING1
GO:0051129	Negative regulation of cellular component organization	33	691	4.77569	0.42	9.56e-05	9606.ENSP00000219150,9606.ENSP00000225655,9606.ENSP00000254810,9606.ENSP00000264758,9606.ENSP00000268058,9606.ENSP00000285093,9606.ENSP00000299138,9606.ENSP00000311747,9606.ENSP00000339191,9606.ENSP00000340278,9606.ENSP00000345347,9606.ENSP00000346032,9606.ENSP00000349259,9606.ENSP00000353375,9606.ENSP00000353731,9606.ENSP00000354947,9606.ENSP00000356969,9606.ENSP00000357283,9606.ENSP00000358866,…	CORO1A,PFN1,H3-3B,ADD1,PML,ACAA2,VPS35,RBM14,CAV1,PARK7,HMGB1,ANXA2,SPTBN1,MAP4,DPP4,CAPZA2,APOA2,LMNA,FLNA,TACSTD2,VDAC2,HSPG2,HSPA1A,GDI2,EMILIN1,DNM2,XRCC5,GDI1,RHOA,HSPA8,SPTAN1,SPTA1,SPTB
GO:0032103	Positive regulation of response to external stimulus	22	453	4.85651	0.42	0.0028	9606.ENSP00000205948,9606.ENSP00000215832,9606.ENSP00000225698,9606.ENSP00000245907,9606.ENSP00000265983,9606.ENSP00000308541,9606.ENSP00000311747,9606.ENSP00000320866,9606.ENSP00000321853,9606.ENSP00000325527,9606.ENSP00000333298,9606.ENSP00000335153,9606.ENSP00000340278,9606.ENSP00000345347,9606.ENSP00000358866,9606.ENSP00000369677,9606.ENSP00000375978,9606.ENSP00000377148,9606.ENSP00000381386,…	APOH,MAPK1,C1QBP,C3,HPX,F2,RBM14,CALR,SERPINF2,FBN1,LAMP1,HSP90AA1,PARK7,HMGB1,FLNA,EMILIN1,XRCC5,AP1G1,DDT,CD14,DNM1L,STING1
GO:0044419	Biological process involved in interspecies interaction between organisms	70	1490	4.69799	0.41	1.95e-09	9606.ENSP00000215832,9606.ENSP00000219150,9606.ENSP00000225275,9606.ENSP00000225371,9606.ENSP00000225698,9606.ENSP00000231751,9606.ENSP00000245907,9606.ENSP00000253496,9606.ENSP00000263408,9606.ENSP00000264908,9606.ENSP00000265983,9606.ENSP00000268058,9606.ENSP00000280326,9606.ENSP00000286713,9606.ENSP00000292609,9606.ENSP00000296028,9606.ENSP00000298510,9606.ENSP00000301764,9606.ENSP00000306099,…	MAPK1,CORO1A,MPO,EPX,C1QBP,LTF,C3,F12,C9,ANXA3,HPX,PML,CCT5,STOM,PGLYRP2,PPBP,PRDX3,DDB1,FGB,F2,RBM14,CALR,ZYX,HADHB,DEFA3,EEF1G,LAMP1,HSP90AA1,CAV1,HSPD1,HMGB1,VAPA,CTSB,HP,HLA-DRB1,DPP4,CFH,HSP90AB1,CNPY3,HSPA1A,HLA-C,ANXA1,IPO7,HNRNPUL1,XRCC5,ITGB1,GAPDH,CD14,TF,ALAD,RPSA,RHOA,DDX39B,CFB,PPIA,FLNB,RPL30,BANF1,HSPA8,JCHAIN,C1R,NPC2,ACTG1,PRPF8,TPT1,SAMHD1,ENO1,MYO1C,FGA,STING1
GO:0007010	Cytoskeleton organization	58	1229	4.71928	0.41	5.43e-08	9606.ENSP00000216181,9606.ENSP00000219150,9606.ENSP00000225655,9606.ENSP00000246069,9606.ENSP00000248437,9606.ENSP00000252456,9606.ENSP00000252699,9606.ENSP00000258198,9606.ENSP00000264758,9606.ENSP00000265709,9606.ENSP00000270142,9606.ENSP00000278572,9606.ENSP00000311747,9606.ENSP00000312634,9606.ENSP00000316029,9606.ENSP00000320866,9606.ENSP00000323856,9606.ENSP00000324422,9606.ENSP00000338934,…	MYH9,CORO1A,PFN1,DSTN,TUBA4A,CNN1,ACTN4,DYNC1LI2,ADD1,ANK1,SOD1,RPS3,RBM14,PDLIM2,TLN1,CALR,PLEC,ZYX,EZR,PPL,PLS3,DYNC1H1,SPTBN1,HLA-DRB1,MAP4,NCKAP1,CAPZA2,EPB41L2,LMNA,FLNA,CNN3,PDLIM1,CAP1,ANXA1,GRB2,ACTN1,ITGB1,MYH11,GAPDH,LCP1,TF,ARPC1B,RHOA,PDCD6IP,FLNB,WDR1,DPYSL2,TUBA1C,CNN2,ACTG1,EPPK1,SPTAN1,SPTA1,SPTB,ALDOA,TPM2,MYO1C,TPM3
GO:0044087	Regulation of cellular component biogenesis	46	971	4.73738	0.41	2.09e-06	9606.ENSP00000219150,9606.ENSP00000225655,9606.ENSP00000254810,9606.ENSP00000264758,9606.ENSP00000267257,9606.ENSP00000278572,9606.ENSP00000299138,9606.ENSP00000311747,9606.ENSP00000316029,9606.ENSP00000321853,9606.ENSP00000335153,9606.ENSP00000337598,9606.ENSP00000338934,9606.ENSP00000339191,9606.ENSP00000340278,9606.ENSP00000345347,9606.ENSP00000347495,9606.ENSP00000348965,9606.ENSP00000349259,…	CORO1A,PFN1,H3-3B,ADD1,PXN,RPS3,VPS35,RBM14,TLN1,SERPINF2,HSP90AA1,LIMS1,EZR,CAV1,PARK7,HMGB1,WARS1,DYNC1H1,SPTBN1,MAP4,NCKAP1,CAPZA2,FLNA,TACSTD2,VDAC2,HSPA1A,GDI2,EMILIN1,DNM2,XRCC5,GRB2,MTPN,LCP1,ARPC1B,SEPTIN9,RHOA,PDCD6IP,EIF4G1,RACK1,HSPA8,CAND1,ACTG1,SPTAN1,SPTA1,SPTB,MYO1C
GO:0045785	Positive regulation of cell adhesion	23	485	4.74227	0.41	0.0027	9606.ENSP00000219150,9606.ENSP00000225698,9606.ENSP00000278572,9606.ENSP00000306099,9606.ENSP00000320866,9606.ENSP00000321853,9606.ENSP00000336829,9606.ENSP00000337598,9606.ENSP00000339191,9606.ENSP00000340019,9606.ENSP00000345347,9606.ENSP00000346300,9606.ENSP00000353099,9606.ENSP00000353731,9606.ENSP00000355771,9606.ENSP00000358866,9606.ENSP00000366109,9606.ENSP00000369677,9606.ENSP00000373905,…	CORO1A,C1QBP,RPS3,FGB,CALR,SERPINF2,FGG,LIMS1,CAV1,HSPD1,HMGB1,CRKL,HLA-DRB1,DPP4,AFDN,FLNA,ANXA1,EMILIN1,DNM2,CD44,RHOA,SPTA1,FGA
GO:0002697	Regulation of immune effector process	18	383	4.69974	0.41	0.0144	9606.ENSP00000225371,9606.ENSP00000225698,9606.ENSP00000245907,9606.ENSP00000265983,9606.ENSP00000292609,9606.ENSP00000303920,9606.ENSP00000323929,9606.ENSP00000333298,9606.ENSP00000340019,9606.ENSP00000345347,9606.ENSP00000353099,9606.ENSP00000356399,9606.ENSP00000356969,9606.ENSP00000366109,9606.ENSP00000377148,9606.ENSP00000405573,9606.ENSP00000416561,9606.ENSP00000498879	EPX,C1QBP,C3,HPX,PGLYRP2,MZB1,A2M,LAMP1,HSPD1,HMGB1,HLA-DRB1,CFH,APOA2,ANXA1,AP1G1,GPI,CFB,CD59
GO:0071496	Cellular response to external stimulus	15	317	4.73186	0.41	0.0338	9606.ENSP00000215832,9606.ENSP00000221419,9606.ENSP00000263579,9606.ENSP00000295897,9606.ENSP00000297991,9606.ENSP00000298223,9606.ENSP00000323856,9606.ENSP00000339191,9606.ENSP00000354511,9606.ENSP00000358081,9606.ENSP00000376800,9606.ENSP00000377284,9606.ENSP00000416255,9606.ENSP00000437125,9606.ENSP00000456436	MAPK1,HNRNPL,DCPS,ALB,AQP3,FOLR2,PLEC,CAV1,COMT,BAG3,MTPN,FOLR1,EIF4G1,HSPA8,CNN2
GO:0070482	Response to oxygen levels	15	318	4.71698	0.41	0.0346	9606.ENSP00000241052,9606.ENSP00000247970,9606.ENSP00000252699,9606.ENSP00000268058,9606.ENSP00000285093,9606.ENSP00000297991,9606.ENSP00000339191,9606.ENSP00000353731,9606.ENSP00000357283,9606.ENSP00000360305,9606.ENSP00000362413,9606.ENSP00000363162,9606.ENSP00000379042,9606.ENSP00000386284,9606.ENSP00000400175	CAT,PIN1,ACTN4,PML,ACAA2,AQP3,CAV1,DPP4,LMNA,PDLIM1,PGK1,ATP6V1G1,ERO1A,ALAD,RHOA
GO:0031667	Response to nutrient levels	21	461	4.55531	0.4	0.008	9606.ENSP00000215832,9606.ENSP00000221419,9606.ENSP00000225275,9606.ENSP00000241052,9606.ENSP00000263579,9606.ENSP00000270142,9606.ENSP00000295897,9606.ENSP00000297991,9606.ENSP00000298223,9606.ENSP00000312999,9606.ENSP00000323856,9606.ENSP00000323929,9606.ENSP00000325527,9606.ENSP00000339191,9606.ENSP00000354511,9606.ENSP00000377192,9606.ENSP00000377284,9606.ENSP00000386284,9606.ENSP00000416255,…	MAPK1,HNRNPL,MPO,CAT,DCPS,SOD1,ALB,AQP3,FOLR2,GNAI2,PLEC,A2M,FBN1,CAV1,COMT,G6PD,FOLR1,ALAD,EIF4G1,ACSL1,HSPA8
GO:0033043	Regulation of organelle organization	54	1190	4.53782	0.39	5.73e-07	9606.ENSP00000215832,9606.ENSP00000219150,9606.ENSP00000223136,9606.ENSP00000225655,9606.ENSP00000246069,9606.ENSP00000247970,9606.ENSP00000254810,9606.ENSP00000258091,9606.ENSP00000264758,9606.ENSP00000267257,9606.ENSP00000268058,9606.ENSP00000268182,9606.ENSP00000278572,9606.ENSP00000280326,9606.ENSP00000285093,9606.ENSP00000295688,9606.ENSP00000299138,9606.ENSP00000311747,9606.ENSP00000313199,…	MAPK1,CORO1A,FIS1,PFN1,DSTN,PIN1,H3-3B,CCT7,ADD1,PXN,PML,IQGAP1,RPS3,CCT5,ACAA2,CCT3,VPS35,RBM14,HNRNPD,CALR,SERPINF2,TMED9,EZR,PARK7,ANXA2,DYNC1H1,SPTBN1,MAP4,NCKAP1,CAPZA2,LMNA,FLNA,TACSTD2,CLIC4,HSPA1A,ANXA1,GDI2,DNM2,XRCC5,GRB2,MTPN,CCT4,LCP1,ARPC1B,SEPTIN9,RHOA,PDCD6IP,WDR1,DNM1L,ACTG1,CLTC,SPTAN1,SPTA1,SPTB
GO:0010628	Positive regulation of gene expression	52	1146	4.53752	0.39	9.58e-07	9606.ENSP00000215832,9606.ENSP00000216181,9606.ENSP00000221419,9606.ENSP00000225371,9606.ENSP00000225698,9606.ENSP00000245907,9606.ENSP00000253039,9606.ENSP00000253496,9606.ENSP00000259396,9606.ENSP00000264690,9606.ENSP00000265983,9606.ENSP00000270142,9606.ENSP00000278572,9606.ENSP00000299138,9606.ENSP00000303920,9606.ENSP00000307940,9606.ENSP00000313199,9606.ENSP00000320171,9606.ENSP00000320866,…	MAPK1,MYH9,HNRNPL,EPX,C1QBP,C3,EIF2S3,F12,ORM1,KLKB1,HPX,SOD1,RPS3,VPS35,MZB1,EEF2,HNRNPD,PKM,CALR,SERPINF2,HSP90AA1,LIMS1,EZR,CAV1,HSPD1,PARK7,PRDX6,HMGB1,ANXA2,WARS1,SPTBN1,AFDN,APOA2,LMNA,RPL5,FUBP1,RPS4X,HSPA1A,ANXA1,EMILIN1,GAPDH,DDT,CD14,RHOA,GPI,EIF4G1,HSPA8,CNN2,ACTG1,SPON1,ENO1,STING1
GO:0006886	Intracellular protein transport	31	683	4.5388	0.39	0.00043	9606.ENSP00000221566,9606.ENSP00000223136,9606.ENSP00000261263,9606.ENSP00000261574,9606.ENSP00000268058,9606.ENSP00000299138,9606.ENSP00000305230,9606.ENSP00000306330,9606.ENSP00000309415,9606.ENSP00000320866,9606.ENSP00000325002,9606.ENSP00000329419,9606.ENSP00000330945,9606.ENSP00000335153,9606.ENSP00000338844,9606.ENSP00000340019,9606.ENSP00000357048,9606.ENSP00000357051,9606.ENSP00000357283,…	SGTA,FIS1,RAB21,IPO5,PML,VPS35,SRP9,YWHAG,CLTB,CALR,COPG1,COPB2,TMED9,HSP90AA1,SEC23B,HSPD1,COPA,PEX19,LMNA,BAG3,IPO7,YWHAQ,SEC13,AP1G1,SEC31A,XPO1,TMED7,HSPA8,CLTC,AP2B1,MYO1C
GO:0044283	Small molecule biosynthetic process	20	446	4.4843	0.39	0.0128	9606.ENSP00000225275,9606.ENSP00000228740,9606.ENSP00000245206,9606.ENSP00000277865,9606.ENSP00000285093,9606.ENSP00000285930,9606.ENSP00000298556,9606.ENSP00000304592,9606.ENSP00000327070,9606.ENSP00000337746,9606.ENSP00000340278,9606.ENSP00000356864,9606.ENSP00000360124,9606.ENSP00000362413,9606.ENSP00000363614,9606.ENSP00000377192,9606.ENSP00000405573,9606.ENSP00000437402,9606.ENSP00000482075,…	MPO,LTA4H,GOT2,GLUD1,ACAA2,AKR1B1,HPRT1,FASN,MDH2,ISYNA1,PARK7,MGST3,PGM1,PGK1,HMGCL,G6PD,GPI,ENO2,PTGES3,PHGDH
GO:0051098	Regulation of binding	17	375	4.53333	0.39	0.0266	9606.ENSP00000221419,9606.ENSP00000247970,9606.ENSP00000264758,9606.ENSP00000339191,9606.ENSP00000340278,9606.ENSP00000345347,9606.ENSP00000346032,9606.ENSP00000357051,9606.ENSP00000358460,9606.ENSP00000360609,9606.ENSP00000363641,9606.ENSP00000416255,9606.ENSP00000418447,9606.ENSP00000426909,9606.ENSP00000460236,9606.ENSP00000495214,9606.ENSP00000498596	HNRNPL,PIN1,ADD1,CAV1,PARK7,HMGB1,ANXA2,PEX19,CLIC2,HSP90AB1,TXN,EIF4G1,PPP2CA,RACK1,SPON1,SPTA1,STING1
GO:0051130	Positive regulation of cellular component organization	46	1049	4.38513	0.38	1.22e-05	9606.ENSP00000215832,9606.ENSP00000223136,9606.ENSP00000225655,9606.ENSP00000245907,9606.ENSP00000246069,9606.ENSP00000254722,9606.ENSP00000258091,9606.ENSP00000261263,9606.ENSP00000264758,9606.ENSP00000267257,9606.ENSP00000268058,9606.ENSP00000278572,9606.ENSP00000280326,9606.ENSP00000295688,9606.ENSP00000299138,9606.ENSP00000313199,9606.ENSP00000321853,9606.ENSP00000330945,9606.ENSP00000335153,…	MAPK1,FIS1,PFN1,C3,DSTN,SERPINF1,CCT7,RAB21,ADD1,PXN,PML,RPS3,CCT5,CCT3,VPS35,HNRNPD,SERPINF2,TMED9,HSP90AA1,LIMS1,CAV1,PARK7,ANXA2,WARS1,DYNC1H1,NCKAP1,FLNA,HSPA1A,ANXA1,EMILIN1,DNM2,XRCC5,GRB2,CCT4,LCP1,CD14,TF,SEPTIN9,GDI1,RHOA,PDCD6IP,EIF4G1,RACK1,WDR1,CAND1,DNM1L
GO:0060548	Negative regulation of cell death	45	1016	4.42913	0.38	1.28e-05	9606.ENSP00000205948,9606.ENSP00000219150,9606.ENSP00000225275,9606.ENSP00000231751,9606.ENSP00000241052,9606.ENSP00000254722,9606.ENSP00000261772,9606.ENSP00000263579,9606.ENSP00000270142,9606.ENSP00000285093,9606.ENSP00000285930,9606.ENSP00000295897,9606.ENSP00000298510,9606.ENSP00000299138,9606.ENSP00000301764,9606.ENSP00000302886,9606.ENSP00000306099,9606.ENSP00000312999,9606.ENSP00000336829,…	APOH,CORO1A,MPO,LTF,CAT,SERPINF1,AARS1,DCPS,SOD1,ACAA2,AKR1B1,ALB,PRDX3,VPS35,DDB1,PA2G4,FGB,GNAI2,FGG,CAV1,HSPD1,PARK7,SFN,LMNA,BAG3,FLNA,HSP90AB1,VDAC2,GLO1,TXN,HSPG2,HSPA1A,ANXA1,NME2,ITGB1,CD44,RHOA,GPI,EIF4G1,PPIA,RACK1,ENO2,TPT1,ENO1,FGA
GO:0019637	Organophosphate metabolic process	40	914	4.37637	0.38	6.52e-05	9606.ENSP00000252603,9606.ENSP00000269848,9606.ENSP00000282541,9606.ENSP00000283415,9606.ENSP00000297258,9606.ENSP00000298556,9606.ENSP00000299198,9606.ENSP00000304229,9606.ENSP00000313490,9606.ENSP00000320171,9606.ENSP00000321259,9606.ENSP00000337746,9606.ENSP00000340278,9606.ENSP00000342026,9606.ENSP00000345656,9606.ENSP00000352401,9606.ENSP00000356969,9606.ENSP00000358547,9606.ENSP00000359991,…	PGLS,PFKL,GPD1L,LPCAT1,FABP5,HPRT1,CKB,HINT1,PFAS,PKM,TALDO1,ISYNA1,PARK7,PRDX6,VAPA,RPE,APOA2,MPP1,PGAM1,PGM1,PGK1,HSPA1A,ACOT9,HADHA,NME2,G6PD,QPRT,GAPDH,PAICS,MYH8,OGDH,RHOA,GPI,ABHD14B,ACSL1,HSPA8,ENO2,SAMHD1,ENO1,ALDOA
GO:0022603	Regulation of anatomical structure morphogenesis	40	920	4.34783	0.38	7.15e-05	9606.ENSP00000205948,9606.ENSP00000216181,9606.ENSP00000219150,9606.ENSP00000223136,9606.ENSP00000225698,9606.ENSP00000245907,9606.ENSP00000252699,9606.ENSP00000254722,9606.ENSP00000261263,9606.ENSP00000264908,9606.ENSP00000268058,9606.ENSP00000299138,9606.ENSP00000306099,9606.ENSP00000308541,9606.ENSP00000320171,9606.ENSP00000320866,9606.ENSP00000336829,9606.ENSP00000337598,9606.ENSP00000338934,…	APOH,MYH9,CORO1A,FIS1,C1QBP,C3,ACTN4,SERPINF1,RAB21,ANXA3,PML,VPS35,FGB,F2,PKM,CALR,FGG,LIMS1,EZR,CRKL,WARS1,COL4A2,FLNA,TACSTD2,PGK1,HSPG2,ANXA1,EMILIN1,DNM2,ITGB1,GDI1,CD44,RHOA,RACK1,WDR1,RNH1,DNM1L,SPTA1,ALDOA,FGA
GO:0031347	Regulation of defense response	28	638	4.38871	0.38	0.0017	9606.ENSP00000225698,9606.ENSP00000245907,9606.ENSP00000253496,9606.ENSP00000254722,9606.ENSP00000264690,9606.ENSP00000265983,9606.ENSP00000268058,9606.ENSP00000270142,9606.ENSP00000273784,9606.ENSP00000292609,9606.ENSP00000299138,9606.ENSP00000311747,9606.ENSP00000323929,9606.ENSP00000324422,9606.ENSP00000333298,9606.ENSP00000335153,9606.ENSP00000340278,9606.ENSP00000345347,9606.ENSP00000353099,…	C1QBP,C3,F12,SERPINF1,KLKB1,HPX,PML,SOD1,AHSG,PGLYRP2,VPS35,RBM14,A2M,ZYX,LAMP1,HSP90AA1,PARK7,HMGB1,HLA-DRB1,CFH,ANXA1,EMILIN1,XRCC5,AP1G1,DDT,BANF1,SAMHD1,STING1
GO:0098609	Cell-cell adhesion	24	542	4.42804	0.38	0.0048	9606.ENSP00000216181,9606.ENSP00000252999,9606.ENSP00000279227,9606.ENSP00000296411,9606.ENSP00000306099,9606.ENSP00000316029,9606.ENSP00000319096,9606.ENSP00000336829,9606.ENSP00000337598,9606.ENSP00000338934,9606.ENSP00000346032,9606.ENSP00000355771,9606.ENSP00000358866,9606.ENSP00000359225,9606.ENSP00000360305,9606.ENSP00000364935,9606.ENSP00000366109,9606.ENSP00000379350,9606.ENSP00000398632,…	MYH9,LAMA5,FERMT3,METAP1,FGB,TLN1,RAP2B,FGG,LIMS1,EZR,ANXA2,AFDN,FLNA,CNN3,PDLIM1,CLIC1,ANXA1,ITGB1,CD44,PPIA,ACTG1,LPP,HBB,FGA
GO:0044089	Positive regulation of cellular component biogenesis	22	500	4.4	0.38	0.0088	9606.ENSP00000225655,9606.ENSP00000267257,9606.ENSP00000278572,9606.ENSP00000321853,9606.ENSP00000335153,9606.ENSP00000337598,9606.ENSP00000339191,9606.ENSP00000340278,9606.ENSP00000347495,9606.ENSP00000348965,9606.ENSP00000354251,9606.ENSP00000364802,9606.ENSP00000369677,9606.ENSP00000373905,9606.ENSP00000376345,9606.ENSP00000381581,9606.ENSP00000391249,9606.ENSP00000400175,9606.ENSP00000411825,…	PFN1,PXN,RPS3,SERPINF2,HSP90AA1,LIMS1,CAV1,PARK7,WARS1,DYNC1H1,NCKAP1,HSPA1A,EMILIN1,DNM2,GRB2,LCP1,SEPTIN9,RHOA,PDCD6IP,EIF4G1,RACK1,CAND1
GO:0051051	Negative regulation of transport	19	432	4.39815	0.38	0.02	9606.ENSP00000219150,9606.ENSP00000223136,9606.ENSP00000269848,9606.ENSP00000297258,9606.ENSP00000299138,9606.ENSP00000312999,9606.ENSP00000339191,9606.ENSP00000340278,9606.ENSP00000345347,9606.ENSP00000346032,9606.ENSP00000356969,9606.ENSP00000358081,9606.ENSP00000358460,9606.ENSP00000363641,9606.ENSP00000366109,9606.ENSP00000394071,9606.ENSP00000426909,9606.ENSP00000456436,9606.ENSP00000481314	CORO1A,FIS1,PFKL,FABP5,VPS35,GNAI2,CAV1,PARK7,HMGB1,ANXA2,APOA2,BAG3,CLIC2,TXN,ANXA1,GDI1,RACK1,CNN2,SNX12
GO:0007155	Cell adhesion	41	965	4.2487	0.37	8.6e-05	9606.ENSP00000216181,9606.ENSP00000219150,9606.ENSP00000252999,9606.ENSP00000265132,9606.ENSP00000267257,9606.ENSP00000270233,9606.ENSP00000279227,9606.ENSP00000295550,9606.ENSP00000296411,9606.ENSP00000298223,9606.ENSP00000306099,9606.ENSP00000316029,9606.ENSP00000319096,9606.ENSP00000324422,9606.ENSP00000325527,9606.ENSP00000336829,9606.ENSP00000337598,9606.ENSP00000338934,9606.ENSP00000346032,…	MYH9,CORO1A,LAMA5,AMBP,PXN,BCAM,FERMT3,COL6A3,METAP1,FOLR2,FGB,TLN1,RAP2B,ZYX,FBN1,FGG,LIMS1,EZR,ANXA2,DPP4,COL6A1,AFDN,FLNA,CNN3,PDLIM1,CLIC1,ANXA1,EMILIN1,NME2,FOLR1,ACTN1,ITGB1,RPSA,CD44,RHOA,PPIA,ACTG1,SPON1,LPP,HBB,FGA
GO:0051338	Regulation of transferase activity	39	912	4.27632	0.37	0.00013	9606.ENSP00000215832,9606.ENSP00000231751,9606.ENSP00000247970,9606.ENSP00000261574,9606.ENSP00000268058,9606.ENSP00000268182,9606.ENSP00000270142,9606.ENSP00000278572,9606.ENSP00000298510,9606.ENSP00000306330,9606.ENSP00000308541,9606.ENSP00000313199,9606.ENSP00000319096,9606.ENSP00000323856,9606.ENSP00000325527,9606.ENSP00000335153,9606.ENSP00000339063,9606.ENSP00000339191,9606.ENSP00000340278,…	MAPK1,LTF,PIN1,IPO5,PML,IQGAP1,SOD1,RPS3,PRDX3,YWHAG,F2,HNRNPD,RAP2B,PLEC,FBN1,HSP90AA1,EEF1A1,CAV1,PARK7,SFN,RPS2,WARS1,HLA-DRB1,APOA2,RPL5,HSP90AB1,TXN,IPO7,XRCC5,CCT4,MVP,CD44,RHOA,PPP2CA,PPIA,ACSL1,RACK1,DNM1L,PTGES3
GO:0009725	Response to hormone	33	762	4.33071	0.37	0.00052	9606.ENSP00000216714,9606.ENSP00000228740,9606.ENSP00000241052,9606.ENSP00000254722,9606.ENSP00000264908,9606.ENSP00000267257,9606.ENSP00000306099,9606.ENSP00000306330,9606.ENSP00000311747,9606.ENSP00000317159,9606.ENSP00000320171,9606.ENSP00000320866,9606.ENSP00000323929,9606.ENSP00000325527,9606.ENSP00000328359,9606.ENSP00000335153,9606.ENSP00000339191,9606.ENSP00000345672,9606.ENSP00000354357,…	APEX1,LTA4H,CAT,SERPINF1,ANXA3,PXN,FGB,YWHAG,RBM14,CYC1,PKM,CALR,A2M,FBN1,DEFA3,HSP90AA1,CAV1,CTSB,GSTM3,APOA2,HSPA1A,ANXA1,GNB1,HADHA,AKR1C1,GRB2,ALAD,ARPC1B,RHOA,GPI,ACSL1,HSPA8,PTGES3
GO:0061024	Membrane organization	33	773	4.26908	0.37	0.00066	9606.ENSP00000216181,9606.ENSP00000219150,9606.ENSP00000221566,9606.ENSP00000262418,9606.ENSP00000270142,9606.ENSP00000285093,9606.ENSP00000298223,9606.ENSP00000323856,9606.ENSP00000330945,9606.ENSP00000335153,9606.ENSP00000338844,9606.ENSP00000339191,9606.ENSP00000345656,9606.ENSP00000346032,9606.ENSP00000346550,9606.ENSP00000349259,9606.ENSP00000353731,9606.ENSP00000356969,9606.ENSP00000357283,…	MYH9,CORO1A,SGTA,SLC4A1,SOD1,ACAA2,FOLR2,PLEC,TMED9,HSP90AA1,SEC23B,CAV1,VAPA,ANXA2,ANXA6,SPTBN1,DPP4,APOA2,LMNA,VDAC2,PEF1,HSPA1A,SEC13,DNM2,FOLR1,SEC31A,RHOA,PDCD6IP,BANF1,HSPA8,DNM1L,NPC2,SPTA1
GO:0009410	Response to xenobiotic stimulus	18	422	4.2654	0.37	0.0346	9606.ENSP00000216714,9606.ENSP00000241052,9606.ENSP00000270142,9606.ENSP00000313490,9606.ENSP00000320866,9606.ENSP00000335153,9606.ENSP00000346300,9606.ENSP00000354357,9606.ENSP00000356969,9606.ENSP00000360609,9606.ENSP00000370023,9606.ENSP00000370254,9606.ENSP00000375978,9606.ENSP00000386284,9606.ENSP00000400175,9606.ENSP00000422607,9606.ENSP00000437402,9606.ENSP00000480004	APEX1,CAT,SOD1,PFAS,CALR,HSP90AA1,CRKL,GSTM3,APOA2,HSP90AB1,HADHA,AKR1C1,XRCC5,ALAD,RHOA,ACSL1,ENO2,EPHX1
GO:1901700	Response to oxygen-containing compound	65	1547	4.20168	0.36	2.7e-07	9606.ENSP00000215832,9606.ENSP00000216714,9606.ENSP00000221419,9606.ENSP00000225275,9606.ENSP00000228740,9606.ENSP00000241052,9606.ENSP00000245206,9606.ENSP00000254722,9606.ENSP00000261574,9606.ENSP00000263579,9606.ENSP00000265132,9606.ENSP00000267257,9606.ENSP00000269848,9606.ENSP00000270142,9606.ENSP00000278572,9606.ENSP00000296028,9606.ENSP00000297991,9606.ENSP00000298223,9606.ENSP00000298510,…	MAPK1,APEX1,HNRNPL,MPO,LTA4H,CAT,GOT2,SERPINF1,IPO5,DCPS,AMBP,PXN,PFKL,SOD1,RPS3,PPBP,AQP3,FOLR2,PRDX3,YWHAG,GNAI2,HNRNPD,CYC1,PKM,CALR,PLEC,A2M,HADHB,FBN1,DEFA3,HSP90AA1,EZR,CAV1,PARK7,HMGB1,CRKL,HP,COL6A1,APOA2,LAMTOR2,FLNA,HSP90AB1,RPS4X,TXN,ANXA1,GNB1,ESD,HADHA,AKR1C1,DNM2,XRCC5,GRB2,G6PD,FOLR1,CD14,ALAD,ARPC1B,RHOA,GPI,EIF4G1,ACSL1,RACK1,ENO2,PRPF8,HBB
GO:0051707	Response to other organism	56	1328	4.21687	0.36	2.19e-06	9606.ENSP00000215832,9606.ENSP00000219150,9606.ENSP00000225275,9606.ENSP00000225371,9606.ENSP00000225698,9606.ENSP00000231751,9606.ENSP00000245907,9606.ENSP00000253496,9606.ENSP00000263408,9606.ENSP00000264908,9606.ENSP00000265983,9606.ENSP00000268058,9606.ENSP00000280326,9606.ENSP00000292609,9606.ENSP00000296028,9606.ENSP00000298510,9606.ENSP00000306099,9606.ENSP00000308541,9606.ENSP00000311747,…	MAPK1,CORO1A,MPO,EPX,C1QBP,LTF,C3,F12,C9,ANXA3,HPX,PML,CCT5,PGLYRP2,PPBP,PRDX3,FGB,F2,RBM14,CALR,ZYX,HADHB,DEFA3,EEF1G,HSP90AA1,CAV1,HMGB1,HP,HLA-DRB1,CFH,CNPY3,HLA-C,ANXA1,IPO7,HNRNPUL1,XRCC5,GAPDH,CD14,TF,ALAD,RHOA,CFB,FLNB,RPL30,BANF1,JCHAIN,C1R,NPC2,ACTG1,PRPF8,TPT1,SAMHD1,ENO1,MYO1C,FGA,STING1
GO:1902533	Positive regulation of intracellular signal transduction	42	997	4.21264	0.36	7.88e-05	9606.ENSP00000157600,9606.ENSP00000223136,9606.ENSP00000225698,9606.ENSP00000231751,9606.ENSP00000241052,9606.ENSP00000252699,9606.ENSP00000268058,9606.ENSP00000268182,9606.ENSP00000270142,9606.ENSP00000278572,9606.ENSP00000304229,9606.ENSP00000306099,9606.ENSP00000308541,9606.ENSP00000312999,9606.ENSP00000320866,9606.ENSP00000321853,9606.ENSP00000335153,9606.ENSP00000336829,9606.ENSP00000337598,…	LMCD1,FIS1,C1QBP,LTF,CAT,ACTN4,PML,IQGAP1,SOD1,RPS3,HINT1,FGB,F2,GNAI2,CALR,SERPINF2,HSP90AA1,FGG,LIMS1,CAV1,PARK7,HMGB1,VAPA,CRKL,HLA-DRB1,LAMTOR2,FLNA,HSP90AB1,TXN,HSPA1A,SEC13,ITGB1,GAPDH,DDT,CD14,CD44,RHOA,EEF1D,PPIA,RACK1,DNM1L,FGA
GO:0051336	Regulation of hydrolase activity	42	1011	4.1543	0.36	0.0001	9606.ENSP00000205948,9606.ENSP00000216802,9606.ENSP00000223136,9606.ENSP00000231751,9606.ENSP00000236671,9606.ENSP00000245907,9606.ENSP00000247970,9606.ENSP00000254722,9606.ENSP00000261313,9606.ENSP00000265132,9606.ENSP00000268058,9606.ENSP00000268182,9606.ENSP00000270142,9606.ENSP00000273784,9606.ENSP00000278572,9606.ENSP00000295550,9606.ENSP00000298510,9606.ENSP00000312999,9606.ENSP00000321853,…	APOH,PSME2,FIS1,LTF,CTSD,C3,PIN1,SERPINF1,PEBP1,AMBP,PML,IQGAP1,SOD1,AHSG,RPS3,COL6A3,PRDX3,GNAI2,SERPINF2,A2M,LIMS1,CAV1,HSPD1,PARK7,SFN,HMGB1,CTSB,ANXA2,CRKL,AFDN,APOA2,HSP90AB1,HSPA1A,ANXA1,PSAP,ITGB1,GAPDH,CD44,RHOA,GPI,RACK1,SERPINB6
GO:0043069	Negative regulation of programmed cell death	38	911	4.17124	0.36	0.00027	9606.ENSP00000205948,9606.ENSP00000219150,9606.ENSP00000225275,9606.ENSP00000231751,9606.ENSP00000241052,9606.ENSP00000261772,9606.ENSP00000263579,9606.ENSP00000270142,9606.ENSP00000285093,9606.ENSP00000285930,9606.ENSP00000295897,9606.ENSP00000298510,9606.ENSP00000301764,9606.ENSP00000302886,9606.ENSP00000306099,9606.ENSP00000312999,9606.ENSP00000336829,9606.ENSP00000339191,9606.ENSP00000340019,…	APOH,CORO1A,MPO,LTF,CAT,AARS1,DCPS,SOD1,ACAA2,AKR1B1,ALB,PRDX3,DDB1,PA2G4,FGB,GNAI2,FGG,CAV1,HSPD1,PARK7,SFN,LMNA,BAG3,FLNA,HSP90AB1,VDAC2,GLO1,HSPA1A,ANXA1,NME2,ITGB1,CD44,RHOA,GPI,PPIA,TPT1,ENO1,FGA
GO:0043066	Negative regulation of apoptotic process	37	891	4.15264	0.36	0.00038	9606.ENSP00000205948,9606.ENSP00000219150,9606.ENSP00000225275,9606.ENSP00000231751,9606.ENSP00000241052,9606.ENSP00000261772,9606.ENSP00000270142,9606.ENSP00000285093,9606.ENSP00000285930,9606.ENSP00000295897,9606.ENSP00000298510,9606.ENSP00000301764,9606.ENSP00000302886,9606.ENSP00000306099,9606.ENSP00000312999,9606.ENSP00000336829,9606.ENSP00000339191,9606.ENSP00000340019,9606.ENSP00000340278,…	APOH,CORO1A,MPO,LTF,CAT,AARS1,SOD1,ACAA2,AKR1B1,ALB,PRDX3,DDB1,PA2G4,FGB,GNAI2,FGG,CAV1,HSPD1,PARK7,SFN,LMNA,BAG3,FLNA,HSP90AB1,VDAC2,GLO1,HSPA1A,ANXA1,NME2,ITGB1,CD44,RHOA,GPI,PPIA,TPT1,ENO1,FGA
GO:0061061	Muscle structure development	21	498	4.21687	0.36	0.0181	9606.ENSP00000216181,9606.ENSP00000252699,9606.ENSP00000252999,9606.ENSP00000254810,9606.ENSP00000295550,9606.ENSP00000312634,9606.ENSP00000320866,9606.ENSP00000323856,9606.ENSP00000339191,9606.ENSP00000357283,9606.ENSP00000360305,9606.ENSP00000376678,9606.ENSP00000376800,9606.ENSP00000377941,9606.ENSP00000379350,9606.ENSP00000379616,9606.ENSP00000400175,9606.ENSP00000420213,9606.ENSP00000427687,…	MYH9,ACTN4,LAMA5,H3-3B,COL6A3,PDLIM2,CALR,PLEC,CAV1,LMNA,PDLIM1,TAGLN,MTPN,ACTN1,ITGB1,MYH11,RHOA,FLNB,WDR1,MYL6,ACTG1
GO:0050778	Positive regulation of immune response	21	502	4.18327	0.36	0.0198	9606.ENSP00000215832,9606.ENSP00000225698,9606.ENSP00000245907,9606.ENSP00000263408,9606.ENSP00000265983,9606.ENSP00000278572,9606.ENSP00000311747,9606.ENSP00000333298,9606.ENSP00000335153,9606.ENSP00000340019,9606.ENSP00000340278,9606.ENSP00000345347,9606.ENSP00000346300,9606.ENSP00000353099,9606.ENSP00000356399,9606.ENSP00000366109,9606.ENSP00000375978,9606.ENSP00000377148,9606.ENSP00000416561,…	MAPK1,C1QBP,C3,C9,HPX,RPS3,RBM14,LAMP1,HSP90AA1,HSPD1,PARK7,HMGB1,CRKL,HLA-DRB1,CFH,ANXA1,XRCC5,AP1G1,CFB,C1R,STING1
GO:0070848	Response to growth factor	21	503	4.17495	0.36	0.02	9606.ENSP00000215832,9606.ENSP00000219150,9606.ENSP00000241052,9606.ENSP00000258198,9606.ENSP00000264908,9606.ENSP00000267257,9606.ENSP00000268058,9606.ENSP00000268182,9606.ENSP00000324422,9606.ENSP00000325527,9606.ENSP00000337598,9606.ENSP00000339063,9606.ENSP00000339191,9606.ENSP00000346300,9606.ENSP00000353654,9606.ENSP00000366109,9606.ENSP00000376345,9606.ENSP00000387996,9606.ENSP00000398632,…	MAPK1,CORO1A,CAT,DYNC1LI2,ANXA3,PXN,PML,IQGAP1,ZYX,FBN1,LIMS1,EEF1A1,CAV1,CRKL,COL4A2,ANXA1,GRB2,CSTF2,CD44,RACK1,MYO1C
GO:0031400	Negative regulation of protein modification process	21	506	4.1502	0.36	0.0213	9606.ENSP00000261574,9606.ENSP00000278572,9606.ENSP00000282541,9606.ENSP00000306330,9606.ENSP00000312999,9606.ENSP00000323856,9606.ENSP00000339191,9606.ENSP00000340278,9606.ENSP00000340989,9606.ENSP00000346300,9606.ENSP00000347495,9606.ENSP00000359345,9606.ENSP00000364802,9606.ENSP00000369042,9606.ENSP00000369677,9606.ENSP00000377192,9606.ENSP00000378760,9606.ENSP00000416255,9606.ENSP00000418447,…	IPO5,RPS3,GPD1L,YWHAG,GNAI2,PLEC,CAV1,PARK7,SFN,CRKL,WARS1,RPL5,HSPA1A,IPO7,EMILIN1,G6PD,MVP,EIF4G1,PPP2CA,PPIA,RACK1
GO:0060284	Regulation of cell development	21	506	4.1502	0.36	0.0213	9606.ENSP00000225698,9606.ENSP00000231751,9606.ENSP00000252699,9606.ENSP00000254722,9606.ENSP00000261263,9606.ENSP00000264758,9606.ENSP00000306099,9606.ENSP00000308541,9606.ENSP00000320866,9606.ENSP00000325527,9606.ENSP00000336829,9606.ENSP00000337598,9606.ENSP00000346032,9606.ENSP00000346300,9606.ENSP00000358866,9606.ENSP00000360269,9606.ENSP00000373905,9606.ENSP00000375978,9606.ENSP00000379350,…	C1QBP,LTF,ACTN4,SERPINF1,RAB21,ADD1,FGB,F2,CALR,FBN1,FGG,LIMS1,ANXA2,CRKL,FLNA,TACSTD2,DNM2,XRCC5,ITGB1,GDI1,FGA
GO:0001558	Regulation of cell growth	18	428	4.20561	0.36	0.0393	9606.ENSP00000254810,9606.ENSP00000261263,9606.ENSP00000268058,9606.ENSP00000308541,9606.ENSP00000340989,9606.ENSP00000346300,9606.ENSP00000357288,9606.ENSP00000364802,9606.ENSP00000373905,9606.ENSP00000376800,9606.ENSP00000377192,9606.ENSP00000394071,9606.ENSP00000400175,9606.ENSP00000416255,9606.ENSP00000418447,9606.ENSP00000426909,9606.ENSP00000427985,9606.ENSP00000495530	H3-3B,RAB21,PML,F2,SFN,CRKL,LAMTOR2,HSPA1A,DNM2,MTPN,G6PD,GDI1,RHOA,EIF4G1,PPP2CA,RACK1,DPYSL2,ENO1
GO:0002683	Negative regulation of immune system process	18	433	4.15704	0.36	0.0434	9606.ENSP00000225371,9606.ENSP00000231751,9606.ENSP00000265132,9606.ENSP00000292609,9606.ENSP00000323929,9606.ENSP00000325527,9606.ENSP00000338934,9606.ENSP00000345347,9606.ENSP00000353099,9606.ENSP00000353731,9606.ENSP00000356969,9606.ENSP00000366109,9606.ENSP00000369677,9606.ENSP00000381386,9606.ENSP00000433760,9606.ENSP00000456436,9606.ENSP00000493536,9606.ENSP00000498879	EPX,LTF,AMBP,PGLYRP2,A2M,FBN1,EZR,HMGB1,HLA-DRB1,DPP4,APOA2,ANXA1,EMILIN1,DDT,BANF1,CNN2,SAMHD1,CD59
GO:0044281	Small molecule metabolic process	67	1645	4.07295	0.35	3.79e-07	9606.ENSP00000215832,9606.ENSP00000221418,9606.ENSP00000225275,9606.ENSP00000228740,9606.ENSP00000241052,9606.ENSP00000245206,9606.ENSP00000245907,9606.ENSP00000258317,9606.ENSP00000261733,9606.ENSP00000261772,9606.ENSP00000269848,9606.ENSP00000277865,9606.ENSP00000285093,9606.ENSP00000285930,9606.ENSP00000297258,9606.ENSP00000298556,9606.ENSP00000303356,9606.ENSP00000304229,9606.ENSP00000304592,…	MAPK1,ECH1,MPO,LTA4H,CAT,GOT2,C3,NPL,ALDH2,AARS1,PFKL,GLUD1,ACAA2,AKR1B1,FABP5,HPRT1,DCXR,HINT1,FASN,ADH1B,GMPPB,GRHPR,PFAS,PKM,HADHB,FBN1,MDH2,ISYNA1,PARK7,WARS1,MGST3,APOA2,MPP1,PGAM1,PGM1,PGK1,GLO1,HMGCL,HSPA1A,ESD,ACOT9,HADHA,AKR1C1,NME2,G6PD,FOLR1,NIT2,QPRT,GAPDH,HAGH,PAICS,MYH8,OGDH,RHOA,GPI,MPST,ABHD14B,ACSL1,HSPA8,ENO2,NPC2,EPHX1,PTGES3,PHGDH,SAMHD1,ENO1,ALDOA
GO:0009719	Response to endogenous stimulus	56	1363	4.10858	0.35	4.38e-06	9606.ENSP00000215832,9606.ENSP00000216714,9606.ENSP00000219150,9606.ENSP00000228740,9606.ENSP00000241052,9606.ENSP00000254722,9606.ENSP00000258198,9606.ENSP00000261574,9606.ENSP00000264908,9606.ENSP00000267257,9606.ENSP00000268058,9606.ENSP00000268182,9606.ENSP00000270142,9606.ENSP00000298223,9606.ENSP00000306099,9606.ENSP00000306330,9606.ENSP00000311747,9606.ENSP00000313199,9606.ENSP00000317159,…	MAPK1,APEX1,CORO1A,LTA4H,CAT,SERPINF1,DYNC1LI2,IPO5,ANXA3,PXN,PML,IQGAP1,SOD1,FOLR2,FGB,YWHAG,RBM14,HNRNPD,CYC1,PKM,CALR,A2M,ZYX,FBN1,DEFA3,HSP90AA1,LIMS1,EZR,EEF1A1,CAV1,CTSB,CRKL,COL4A2,GSTM3,COL6A1,APOA2,LAMTOR2,FLNA,HSPA1A,ANXA1,GNB1,HADHA,AKR1C1,DNM2,GRB2,FOLR1,ITGB1,ALAD,CSTF2,ARPC1B,CD44,RHOA,GPI,ACSL1,HSPA8,PTGES3
GO:0080134	Regulation of response to stress	56	1373	4.07866	0.35	5.44e-06	9606.ENSP00000205948,9606.ENSP00000215832,9606.ENSP00000221566,9606.ENSP00000225698,9606.ENSP00000245907,9606.ENSP00000253496,9606.ENSP00000254722,9606.ENSP00000264690,9606.ENSP00000265132,9606.ENSP00000265983,9606.ENSP00000268058,9606.ENSP00000268717,9606.ENSP00000270142,9606.ENSP00000273784,9606.ENSP00000278572,9606.ENSP00000292609,9606.ENSP00000299138,9606.ENSP00000306099,9606.ENSP00000308541,…	APOH,MAPK1,SGTA,C1QBP,C3,F12,SERPINF1,KLKB1,AMBP,HPX,PML,COPS3,SOD1,AHSG,RPS3,PGLYRP2,VPS35,FGB,F2,RBM14,SERPINF2,A2M,ZYX,LAMP1,HSP90AA1,FGG,EZR,CAV1,PARK7,HMGB1,ANXA2,HLA-DRB1,CFH,LMNA,FLNA,TXN,HSPA1A,ANXA1,EMILIN1,XRCC5,AP1G1,ITGB1,DDT,CD44,EIF4G1,DDX39B,PPIA,RACK1,BANF1,ACTG1,TPT1,EPPK1,SAMHD1,ENO1,FGA,STING1
GO:0016192	Vesicle-mediated transport	53	1298	4.0832	0.35	1.14e-05	9606.ENSP00000215832,9606.ENSP00000216181,9606.ENSP00000219150,9606.ENSP00000264908,9606.ENSP00000265709,9606.ENSP00000269886,9606.ENSP00000271064,9606.ENSP00000273784,9606.ENSP00000298223,9606.ENSP00000299138,9606.ENSP00000303366,9606.ENSP00000309415,9606.ENSP00000325002,9606.ENSP00000329419,9606.ENSP00000330945,9606.ENSP00000333298,9606.ENSP00000338844,9606.ENSP00000338934,9606.ENSP00000339191,…	MAPK1,MYH9,CORO1A,ANXA3,ANK1,SH3GL1,TINAGL1,AHSG,FOLR2,VPS35,LMAN2,CLTB,COPG1,COPB2,TMED9,LAMP1,SEC23B,EZR,CAV1,HMGB1,VAPA,ANXA2,SPTBN1,DPP4,COPA,FLNA,CAP1,PEF1,HSPG2,HSPA1A,ANXA1,GDI2,SEC13,DNM2,GRB2,AP1G1,FOLR1,SEC31A,ITGB1,CD14,GDI1,ANXA11,TMED7,PDCD6IP,DPYSL2,HSPA8,DNM1L,CNN2,ACTG1,COPE,CLTC,SNX12,AP2B1
GO:0045184	Establishment of protein localization	52	1272	4.08805	0.35	1.33e-05	9606.ENSP00000216181,9606.ENSP00000221566,9606.ENSP00000223136,9606.ENSP00000252699,9606.ENSP00000261263,9606.ENSP00000261574,9606.ENSP00000268058,9606.ENSP00000299138,9606.ENSP00000303366,9606.ENSP00000305230,9606.ENSP00000306330,9606.ENSP00000309415,9606.ENSP00000320866,9606.ENSP00000325002,9606.ENSP00000329419,9606.ENSP00000330945,9606.ENSP00000333298,9606.ENSP00000335153,9606.ENSP00000336829,…	MYH9,SGTA,FIS1,ACTN4,RAB21,IPO5,PML,VPS35,LMAN2,SRP9,YWHAG,CLTB,CALR,COPG1,COPB2,TMED9,LAMP1,HSP90AA1,FGG,LIMS1,SEC23B,CAV1,HSPD1,PARK7,SPTBN1,AFDN,COPA,PEX19,LMNA,BAG3,FLNA,ANXA1,RRBP1,IPO7,GDI2,YWHAQ,SEC13,DNM2,AP1G1,SEC31A,KTN1,MVP,XPO1,GDI1,TMED7,PDCD6IP,HSPA8,COPE,CLTC,SNX12,AP2B1,MYO1C
GO:0015031	Protein transport	48	1180	4.0678	0.35	4.11e-05	9606.ENSP00000216181,9606.ENSP00000221566,9606.ENSP00000223136,9606.ENSP00000252699,9606.ENSP00000261263,9606.ENSP00000261574,9606.ENSP00000268058,9606.ENSP00000299138,9606.ENSP00000303366,9606.ENSP00000305230,9606.ENSP00000306330,9606.ENSP00000309415,9606.ENSP00000320866,9606.ENSP00000325002,9606.ENSP00000329419,9606.ENSP00000330945,9606.ENSP00000335153,9606.ENSP00000336829,9606.ENSP00000338844,…	MYH9,SGTA,FIS1,ACTN4,RAB21,IPO5,PML,VPS35,LMAN2,SRP9,YWHAG,CLTB,CALR,COPG1,COPB2,TMED9,HSP90AA1,FGG,SEC23B,CAV1,HSPD1,PARK7,SPTBN1,COPA,PEX19,LMNA,BAG3,ANXA1,RRBP1,IPO7,GDI2,YWHAQ,SEC13,DNM2,AP1G1,SEC31A,KTN1,MVP,XPO1,GDI1,TMED7,PDCD6IP,HSPA8,COPE,CLTC,SNX12,AP2B1,MYO1C
GO:1901135	Carbohydrate derivative metabolic process	41	998	4.10822	0.35	0.00017	9606.ENSP00000252603,9606.ENSP00000258317,9606.ENSP00000269848,9606.ENSP00000282541,9606.ENSP00000285930,9606.ENSP00000292609,9606.ENSP00000298556,9606.ENSP00000304229,9606.ENSP00000309092,9606.ENSP00000313490,9606.ENSP00000320171,9606.ENSP00000321259,9606.ENSP00000327336,9606.ENSP00000340278,9606.ENSP00000352401,9606.ENSP00000358547,9606.ENSP00000359664,9606.ENSP00000359991,9606.ENSP00000360124,…	PGLS,NPL,PFKL,GPD1L,AKR1B1,PGLYRP2,HPRT1,HINT1,GMPPB,PFAS,PKM,TALDO1,BGN,PARK7,RPE,MPP1,CTBS,PGAM1,PGM1,PGK1,HSPA1A,ACOT9,AKR1C1,HNRNPUL1,NME2,G6PD,GAPDH,PAICS,MYH8,OGDH,CD44,RHOA,GPI,ABHD14B,ACSL1,OSTC,HSPA8,ENO2,SAMHD1,ENO1,ALDOA
GO:0030155	Regulation of cell adhesion	32	784	4.08163	0.35	0.0018	9606.ENSP00000219150,9606.ENSP00000225698,9606.ENSP00000252699,9606.ENSP00000252999,9606.ENSP00000268058,9606.ENSP00000278572,9606.ENSP00000279227,9606.ENSP00000306099,9606.ENSP00000316029,9606.ENSP00000320866,9606.ENSP00000321853,9606.ENSP00000336829,9606.ENSP00000337598,9606.ENSP00000339191,9606.ENSP00000340019,9606.ENSP00000345347,9606.ENSP00000346300,9606.ENSP00000353099,9606.ENSP00000353731,…	CORO1A,C1QBP,ACTN4,LAMA5,PML,RPS3,FERMT3,FGB,TLN1,CALR,SERPINF2,FGG,LIMS1,CAV1,HSPD1,HMGB1,CRKL,HLA-DRB1,DPP4,AFDN,FLNA,TACSTD2,ANXA1,EMILIN1,DNM2,PPP1CB,CD44,RHOA,PPP2CA,ACTG1,SPTA1,FGA
GO:0045087	Innate immune response	31	754	4.11141	0.35	0.002	9606.ENSP00000219150,9606.ENSP00000225698,9606.ENSP00000231751,9606.ENSP00000245907,9606.ENSP00000253496,9606.ENSP00000263408,9606.ENSP00000265983,9606.ENSP00000268058,9606.ENSP00000292609,9606.ENSP00000306099,9606.ENSP00000311747,9606.ENSP00000324422,9606.ENSP00000328359,9606.ENSP00000345347,9606.ENSP00000356399,9606.ENSP00000361926,9606.ENSP00000365402,9606.ENSP00000366109,9606.ENSP00000369042,…	CORO1A,C1QBP,LTF,C3,F12,C9,HPX,PML,PGLYRP2,FGB,RBM14,ZYX,DEFA3,HMGB1,CFH,CNPY3,HLA-C,ANXA1,IPO7,XRCC5,GAPDH,CD14,CFB,FLNB,JCHAIN,C1R,ACTG1,SAMHD1,MYO1C,FGA,STING1
GO:0019725	Cellular homeostasis	26	628	4.14013	0.35	0.0065	9606.ENSP00000215832,9606.ENSP00000216714,9606.ENSP00000223136,9606.ENSP00000254722,9606.ENSP00000262418,9606.ENSP00000264613,9606.ENSP00000265983,9606.ENSP00000268058,9606.ENSP00000270142,9606.ENSP00000298510,9606.ENSP00000299198,9606.ENSP00000308541,9606.ENSP00000320866,9606.ENSP00000339191,9606.ENSP00000342026,9606.ENSP00000346550,9606.ENSP00000358081,9606.ENSP00000363162,9606.ENSP00000363500,…	MAPK1,APEX1,FIS1,SERPINF1,SLC4A1,CP,HPX,PML,SOD1,PRDX3,CKB,F2,CALR,CAV1,PRDX6,ANXA6,BAG3,ATP6V1G1,CLIC4,TXN,ERO1A,TF,RACK1,ATOX1,TPT1,ALDOA
GO:0071407	Cellular response to organic cyclic compound	21	508	4.13386	0.35	0.022	9606.ENSP00000215832,9606.ENSP00000216714,9606.ENSP00000254722,9606.ENSP00000270142,9606.ENSP00000298223,9606.ENSP00000313199,9606.ENSP00000320866,9606.ENSP00000328359,9606.ENSP00000338934,9606.ENSP00000339191,9606.ENSP00000358866,9606.ENSP00000360609,9606.ENSP00000364802,9606.ENSP00000366109,9606.ENSP00000367872,9606.ENSP00000373905,9606.ENSP00000377284,9606.ENSP00000400175,9606.ENSP00000437125,…	MAPK1,APEX1,SERPINF1,SOD1,FOLR2,HNRNPD,CALR,DEFA3,EZR,CAV1,FLNA,HSP90AB1,HSPA1A,ANXA1,GNB1,DNM2,FOLR1,RHOA,HSPA8,PTGES3,STING1
GO:0032870	Cellular response to hormone stimulus	20	489	4.08998	0.35	0.0314	9606.ENSP00000216714,9606.ENSP00000254722,9606.ENSP00000267257,9606.ENSP00000306099,9606.ENSP00000306330,9606.ENSP00000320171,9606.ENSP00000320866,9606.ENSP00000325527,9606.ENSP00000328359,9606.ENSP00000339191,9606.ENSP00000345672,9606.ENSP00000364802,9606.ENSP00000366109,9606.ENSP00000367872,9606.ENSP00000370254,9606.ENSP00000376345,9606.ENSP00000400175,9606.ENSP00000422607,9606.ENSP00000437125,…	APEX1,SERPINF1,PXN,FGB,YWHAG,PKM,CALR,FBN1,DEFA3,CAV1,CTSB,HSPA1A,ANXA1,GNB1,AKR1C1,GRB2,RHOA,ACSL1,HSPA8,PTGES3
GO:0032879	Regulation of localization	84	2103	3.99429	0.34	1.47e-08	9606.ENSP00000215832,9606.ENSP00000219150,9606.ENSP00000223136,9606.ENSP00000236671,9606.ENSP00000245907,9606.ENSP00000247970,9606.ENSP00000252699,9606.ENSP00000258091,9606.ENSP00000261263,9606.ENSP00000261574,9606.ENSP00000268058,9606.ENSP00000269848,9606.ENSP00000270142,9606.ENSP00000273784,9606.ENSP00000277865,9606.ENSP00000280326,9606.ENSP00000282541,9606.ENSP00000285093,9606.ENSP00000286713,…	MAPK1,CORO1A,FIS1,CTSD,C3,PIN1,ACTN4,CCT7,RAB21,IPO5,PML,PFKL,SOD1,AHSG,GLUD1,CCT5,GPD1L,ACAA2,STOM,CCT3,FABP5,VPS35,LMAN2,GNB2,FGB,F2,GNAI2,CALR,LAMP1,HSP90AA1,FGG,EZR,CAV1,NDUFA4,PARK7,SFN,HMGB1,ANXA2,CRKL,ANXA6,DYNC1H1,SPTBN1,HLA-DRB1,AFDN,APOA2,EPB41L2,LMNA,BAG3,CLIC2,FLNA,HSP90AB1,CLIC4,TXN,HSPA1A,CLIC1,ANXA1,GDI2,DNM2,AP1G1,G6PD,CCT4,ERO1A,ITGB1,LCP1,XPO1,CD14,TF,GDI1,RHOA,PDCD6IP,CFB,CLIC3…
GO:0009628	Response to abiotic stimulus	44	1107	3.97471	0.34	0.00016	9606.ENSP00000225275,9606.ENSP00000241052,9606.ENSP00000247970,9606.ENSP00000252699,9606.ENSP00000254722,9606.ENSP00000268058,9606.ENSP00000268717,9606.ENSP00000270142,9606.ENSP00000285093,9606.ENSP00000285930,9606.ENSP00000297991,9606.ENSP00000301764,9606.ENSP00000313199,9606.ENSP00000320866,9606.ENSP00000323856,9606.ENSP00000335153,9606.ENSP00000339191,9606.ENSP00000340019,9606.ENSP00000340510,…	MPO,CAT,PIN1,ACTN4,SERPINF1,PML,COPS3,SOD1,ACAA2,AKR1B1,AQP3,DDB1,HNRNPD,CALR,PLEC,HSP90AA1,CAV1,HSPD1,PPL,DPP4,LMNA,BAG3,PDLIM1,HSP90AB1,PGK1,ATP6V1G1,TXN,HSPA1A,ANXA1,DNM2,XRCC5,GRB2,MTPN,PPP1CB,ERO1A,ITGB1,CD14,ALAD,RHOA,GPI,EEF1D,CNN2,ACTG1,SERPINB6
GO:1901701	Cellular response to oxygen-containing compound	42	1057	3.97351	0.34	0.00026	9606.ENSP00000215832,9606.ENSP00000216714,9606.ENSP00000225275,9606.ENSP00000241052,9606.ENSP00000254722,9606.ENSP00000261574,9606.ENSP00000263579,9606.ENSP00000265132,9606.ENSP00000267257,9606.ENSP00000270142,9606.ENSP00000278572,9606.ENSP00000296028,9606.ENSP00000298223,9606.ENSP00000298510,9606.ENSP00000306330,9606.ENSP00000312999,9606.ENSP00000313199,9606.ENSP00000320171,9606.ENSP00000323856,…	MAPK1,APEX1,MPO,CAT,SERPINF1,IPO5,DCPS,AMBP,PXN,SOD1,RPS3,PPBP,FOLR2,PRDX3,YWHAG,GNAI2,HNRNPD,PKM,PLEC,HADHB,FBN1,DEFA3,EZR,CAV1,PARK7,HMGB1,CRKL,COL6A1,LAMTOR2,FLNA,ANXA1,GNB1,ESD,AKR1C1,DNM2,XRCC5,GRB2,FOLR1,CD14,RHOA,RACK1,PRPF8
GO:0009894	Regulation of catabolic process	40	988	4.04858	0.34	0.00029	9606.ENSP00000216714,9606.ENSP00000216802,9606.ENSP00000221566,9606.ENSP00000229268,9606.ENSP00000247970,9606.ENSP00000262418,9606.ENSP00000263579,9606.ENSP00000268058,9606.ENSP00000273986,9606.ENSP00000283415,9606.ENSP00000299138,9606.ENSP00000301764,9606.ENSP00000313199,9606.ENSP00000335153,9606.ENSP00000338934,9606.ENSP00000339063,9606.ENSP00000339191,9606.ENSP00000340278,9606.ENSP00000345347,…	APEX1,PSME2,SGTA,USP5,PIN1,SLC4A1,DCPS,PML,CISD2,LPCAT1,VPS35,DDB1,HNRNPD,HSP90AA1,EZR,EEF1A1,CAV1,PARK7,HMGB1,ANXA2,HP,APOA2,BAG3,FLNA,RPL5,PGAM1,HSP90AB1,ATP6V1G1,HSPA1A,PSAP,ITGB1,GAPDH,XPO1,ALAD,EIF4G1,RACK1,DNM1L,F8A3,SNX12,STING1
GO:1902532	Negative regulation of intracellular signal transduction	21	519	4.04624	0.34	0.0276	9606.ENSP00000225698,9606.ENSP00000247970,9606.ENSP00000261313,9606.ENSP00000265132,9606.ENSP00000282541,9606.ENSP00000338934,9606.ENSP00000339191,9606.ENSP00000340278,9606.ENSP00000361635,9606.ENSP00000364802,9606.ENSP00000369677,9606.ENSP00000373312,9606.ENSP00000379350,9606.ENSP00000398632,9606.ENSP00000400175,9606.ENSP00000416269,9606.ENSP00000418447,9606.ENSP00000419425,9606.ENSP00000426909,…	C1QBP,PIN1,PEBP1,AMBP,GPD1L,EZR,CAV1,PARK7,VDAC2,HSPA1A,EMILIN1,SEC13,ITGB1,CD44,RHOA,DDX39B,PPP2CA,PPIA,RACK1,TPT1,ENO1
GO:0071363	Cellular response to growth factor stimulus	19	473	4.01691	0.34	0.0465	9606.ENSP00000219150,9606.ENSP00000241052,9606.ENSP00000258198,9606.ENSP00000267257,9606.ENSP00000268058,9606.ENSP00000268182,9606.ENSP00000324422,9606.ENSP00000325527,9606.ENSP00000337598,9606.ENSP00000339063,9606.ENSP00000339191,9606.ENSP00000346300,9606.ENSP00000353654,9606.ENSP00000366109,9606.ENSP00000376345,9606.ENSP00000387996,9606.ENSP00000398632,9606.ENSP00000426909,9606.ENSP00000496954	CORO1A,CAT,DYNC1LI2,PXN,PML,IQGAP1,ZYX,FBN1,LIMS1,EEF1A1,CAV1,CRKL,COL4A2,ANXA1,GRB2,CSTF2,CD44,RACK1,MYO1C
GO:0051246	Regulation of protein metabolic process	102	2622	3.89016	0.33	3.91e-10	9606.ENSP00000215832,9606.ENSP00000216181,9606.ENSP00000216802,9606.ENSP00000221419,9606.ENSP00000221566,9606.ENSP00000223136,9606.ENSP00000225698,9606.ENSP00000229268,9606.ENSP00000231751,9606.ENSP00000236671,9606.ENSP00000245907,9606.ENSP00000247970,9606.ENSP00000248342,9606.ENSP00000253039,9606.ENSP00000253496,9606.ENSP00000254722,9606.ENSP00000261313,9606.ENSP00000261574,9606.ENSP00000261772,…	MAPK1,MYH9,PSME2,HNRNPL,SGTA,FIS1,C1QBP,USP5,LTF,CTSD,C3,PIN1,EIF3K,EIF2S3,F12,SERPINF1,PEBP1,IPO5,AARS1,DCPS,KLKB1,AMBP,HPX,PML,IQGAP1,COPS3,SOD1,AHSG,RPS3,GPD1L,LPCAT1,COL6A3,METAP1,PRDX3,VPS35,DDB1,PA2G4,SRP9,YWHAG,EEF2,F2,GNAI2,HNRNPD,RAP2B,PKM,CALR,SERPINF2,PLEC,A2M,FBN1,EEF1G,HSP90AA1,SF3B1,EZR,EEF1A1,CAV1,HSPD1,PARK7,SFN,RPS2,HMGB1,CTSB,ANXA2,RPL22,CRKL,WARS1,HLA-DRB1,LMNA,FLNA,RPL5,HSP90A…
GO:0051049	Regulation of transport	69	1763	3.91378	0.33	7.77e-07	9606.ENSP00000215832,9606.ENSP00000219150,9606.ENSP00000223136,9606.ENSP00000245907,9606.ENSP00000252699,9606.ENSP00000261263,9606.ENSP00000261574,9606.ENSP00000268058,9606.ENSP00000269848,9606.ENSP00000270142,9606.ENSP00000273784,9606.ENSP00000277865,9606.ENSP00000282541,9606.ENSP00000285093,9606.ENSP00000286713,9606.ENSP00000297258,9606.ENSP00000299138,9606.ENSP00000303366,9606.ENSP00000305260,…	MAPK1,CORO1A,FIS1,C3,ACTN4,RAB21,IPO5,PML,PFKL,SOD1,AHSG,GLUD1,GPD1L,ACAA2,STOM,FABP5,VPS35,LMAN2,GNB2,FGB,F2,GNAI2,CALR,LAMP1,HSP90AA1,FGG,EZR,CAV1,NDUFA4,PARK7,SFN,HMGB1,ANXA2,DYNC1H1,HLA-DRB1,APOA2,BAG3,CLIC2,FLNA,HSP90AB1,CLIC4,TXN,HSPA1A,CLIC1,ANXA1,DNM2,AP1G1,G6PD,ITGB1,LCP1,XPO1,CD14,TF,GDI1,RHOA,PDCD6IP,CFB,CLIC3,PPIA,ACSL1,RACK1,HSPA8,DNM1L,CNN2,ACTG1,SEPTIN2,SNX12,MYO1C,FGA
GO:0010941	Regulation of cell death	65	1651	3.93701	0.33	1.7e-06	9606.ENSP00000205948,9606.ENSP00000216714,9606.ENSP00000219150,9606.ENSP00000223136,9606.ENSP00000225275,9606.ENSP00000225698,9606.ENSP00000231751,9606.ENSP00000236671,9606.ENSP00000241052,9606.ENSP00000245907,9606.ENSP00000252699,9606.ENSP00000254722,9606.ENSP00000261772,9606.ENSP00000263579,9606.ENSP00000268058,9606.ENSP00000270142,9606.ENSP00000278572,9606.ENSP00000285093,9606.ENSP00000285930,…	APOH,APEX1,CORO1A,FIS1,MPO,C1QBP,LTF,CTSD,CAT,C3,ACTN4,SERPINF1,AARS1,DCPS,PML,SOD1,RPS3,ACAA2,AKR1B1,ALB,PRDX3,VPS35,PDIA3,DDB1,PA2G4,FGB,GNAI2,CALR,HSP90AA1,FGG,CAV1,HSPD1,PARK7,SFN,HMGB1,CTSB,HP,LMNA,BAG3,FLNA,HSP90AB1,VDAC2,GLO1,TXN,HSPG2,HSPA1A,ANXA1,DNM2,NME2,G6PD,ACTN1,ITGB1,CD44,RHOA,GPI,EEF1D,EIF4G1,PPIA,RACK1,ENO2,DNM1L,TPT1,HBB,ENO1,FGA
GO:0006952	Defense response	54	1394	3.87374	0.33	3.25e-05	9606.ENSP00000219150,9606.ENSP00000225275,9606.ENSP00000225371,9606.ENSP00000225698,9606.ENSP00000231751,9606.ENSP00000245907,9606.ENSP00000253496,9606.ENSP00000259396,9606.ENSP00000263408,9606.ENSP00000264690,9606.ENSP00000264908,9606.ENSP00000265983,9606.ENSP00000268058,9606.ENSP00000273784,9606.ENSP00000292609,9606.ENSP00000296028,9606.ENSP00000298223,9606.ENSP00000304592,9606.ENSP00000306099,…	CORO1A,MPO,EPX,C1QBP,LTF,C3,F12,ORM1,C9,KLKB1,ANXA3,HPX,PML,AHSG,PGLYRP2,PPBP,FOLR2,FASN,FGB,F2,RBM14,SERPINF2,A2M,ZYX,DEFA3,PARK7,HMGB1,HP,HLA-DRB1,DPP4,CFH,APOA2,CNPY3,HSPG2,HLA-C,ANXA1,IPO7,XRCC5,ITGB1,GAPDH,CD14,TF,CD44,EIF4G1,CFB,FLNB,RPL30,JCHAIN,C1R,ACTG1,SAMHD1,MYO1C,FGA,STING1
GO:0098542	Defense response to other organism	39	989	3.94338	0.33	0.00061	9606.ENSP00000219150,9606.ENSP00000225275,9606.ENSP00000225371,9606.ENSP00000225698,9606.ENSP00000231751,9606.ENSP00000245907,9606.ENSP00000253496,9606.ENSP00000263408,9606.ENSP00000264908,9606.ENSP00000265983,9606.ENSP00000268058,9606.ENSP00000292609,9606.ENSP00000296028,9606.ENSP00000306099,9606.ENSP00000308541,9606.ENSP00000311747,9606.ENSP00000324422,9606.ENSP00000328359,9606.ENSP00000345347,…	CORO1A,MPO,EPX,C1QBP,LTF,C3,F12,C9,ANXA3,HPX,PML,PGLYRP2,PPBP,FGB,F2,RBM14,ZYX,DEFA3,HMGB1,HP,CFH,CNPY3,HLA-C,ANXA1,IPO7,XRCC5,GAPDH,CD14,TF,CFB,FLNB,RPL30,JCHAIN,C1R,ACTG1,SAMHD1,MYO1C,FGA,STING1
GO:0030334	Regulation of cell migration	36	927	3.8835	0.33	0.0016	9606.ENSP00000205948,9606.ENSP00000215832,9606.ENSP00000216714,9606.ENSP00000219150,9606.ENSP00000225655,9606.ENSP00000225698,9606.ENSP00000252699,9606.ENSP00000252999,9606.ENSP00000254722,9606.ENSP00000264908,9606.ENSP00000279227,9606.ENSP00000312999,9606.ENSP00000319096,9606.ENSP00000320866,9606.ENSP00000339191,9606.ENSP00000345347,9606.ENSP00000346300,9606.ENSP00000353731,9606.ENSP00000355771,…	APOH,MAPK1,APEX1,CORO1A,PFN1,C1QBP,ACTN4,LAMA5,SERPINF1,ANXA3,FERMT3,GNAI2,RAP2B,CALR,CAV1,HMGB1,CRKL,DPP4,AFDN,LMNA,MPP1,FLNA,TACSTD2,CLIC4,ANXA1,EMILIN1,ITGB1,DDT,RHOA,GPI,RACK1,DNM1L,CNN2,ACTG1,EPPK1,MYO1C
GO:0010629	Negative regulation of gene expression	35	899	3.89321	0.33	0.0019	9606.ENSP00000221419,9606.ENSP00000225371,9606.ENSP00000225698,9606.ENSP00000231751,9606.ENSP00000254722,9606.ENSP00000254810,9606.ENSP00000259396,9606.ENSP00000263579,9606.ENSP00000268058,9606.ENSP00000278572,9606.ENSP00000292609,9606.ENSP00000299138,9606.ENSP00000305230,9606.ENSP00000308541,9606.ENSP00000313199,9606.ENSP00000320866,9606.ENSP00000321853,9606.ENSP00000338934,9606.ENSP00000340278,…	HNRNPL,EPX,C1QBP,LTF,SERPINF1,H3-3B,ORM1,DCPS,PML,RPS3,PGLYRP2,VPS35,SRP9,F2,HNRNPD,CALR,SERPINF2,EZR,PARK7,HMGB1,CRKL,SND1,HLA-DRB1,APOA2,LMNA,HSP90AB1,HSPA1A,ANXA1,EMILIN1,GAPDH,EIF4G1,RACK1,BANF1,RNH1,SNX12
GO:0014070	Response to organic cyclic compound	34	861	3.9489	0.33	0.0019	9606.ENSP00000215832,9606.ENSP00000216714,9606.ENSP00000241052,9606.ENSP00000254722,9606.ENSP00000264908,9606.ENSP00000270142,9606.ENSP00000297991,9606.ENSP00000298223,9606.ENSP00000313199,9606.ENSP00000320866,9606.ENSP00000323929,9606.ENSP00000328359,9606.ENSP00000335153,9606.ENSP00000338934,9606.ENSP00000339191,9606.ENSP00000356969,9606.ENSP00000358866,9606.ENSP00000360609,9606.ENSP00000364802,…	MAPK1,APEX1,CAT,SERPINF1,ANXA3,SOD1,AQP3,FOLR2,HNRNPD,CALR,A2M,DEFA3,HSP90AA1,EZR,CAV1,APOA2,FLNA,HSP90AB1,HSPA1A,ANXA1,GNB1,DNM2,G6PD,FOLR1,ALAD,ARPC1B,RHOA,GPI,ACSL1,HSPA8,ENO2,EPHX1,PTGES3,STING1
GO:0050776	Regulation of immune response	33	844	3.90995	0.33	0.0028	9606.ENSP00000215832,9606.ENSP00000222219,9606.ENSP00000225698,9606.ENSP00000231751,9606.ENSP00000245907,9606.ENSP00000263408,9606.ENSP00000265132,9606.ENSP00000265983,9606.ENSP00000278572,9606.ENSP00000292609,9606.ENSP00000311747,9606.ENSP00000323929,9606.ENSP00000333298,9606.ENSP00000335153,9606.ENSP00000338934,9606.ENSP00000339191,9606.ENSP00000340019,9606.ENSP00000340278,9606.ENSP00000345347,…	MAPK1,DNASE2,C1QBP,LTF,C3,C9,AMBP,HPX,RPS3,PGLYRP2,RBM14,A2M,LAMP1,HSP90AA1,EZR,CAV1,HSPD1,PARK7,HMGB1,CRKL,HLA-DRB1,CFH,HSPA1A,ANXA1,XRCC5,AP1G1,CD14,CFB,BANF1,C1R,SAMHD1,STING1,CD59
GO:0009617	Response to bacterium	26	663	3.92157	0.33	0.013	9606.ENSP00000215832,9606.ENSP00000225275,9606.ENSP00000225371,9606.ENSP00000231751,9606.ENSP00000245907,9606.ENSP00000264908,9606.ENSP00000292609,9606.ENSP00000296028,9606.ENSP00000298510,9606.ENSP00000306099,9606.ENSP00000308541,9606.ENSP00000325136,9606.ENSP00000328359,9606.ENSP00000339191,9606.ENSP00000345347,9606.ENSP00000348170,9606.ENSP00000353099,9606.ENSP00000385519,9606.ENSP00000385834,…	MAPK1,MPO,EPX,LTF,C3,ANXA3,PGLYRP2,PPBP,PRDX3,FGB,F2,HADHB,DEFA3,CAV1,HMGB1,HP,HLA-DRB1,CD14,TF,ALAD,RHOA,CFB,RPL30,JCHAIN,PRPF8,FGA
GO:0051347	Positive regulation of transferase activity	23	586	3.92491	0.33	0.0241	9606.ENSP00000215832,9606.ENSP00000231751,9606.ENSP00000247970,9606.ENSP00000268182,9606.ENSP00000278572,9606.ENSP00000308541,9606.ENSP00000313199,9606.ENSP00000325527,9606.ENSP00000335153,9606.ENSP00000340278,9606.ENSP00000341885,9606.ENSP00000353099,9606.ENSP00000356969,9606.ENSP00000360609,9606.ENSP00000363641,9606.ENSP00000375978,9606.ENSP00000377958,9606.ENSP00000398632,9606.ENSP00000400175,…	MAPK1,LTF,PIN1,IQGAP1,RPS3,F2,HNRNPD,FBN1,HSP90AA1,PARK7,RPS2,HLA-DRB1,APOA2,HSP90AB1,TXN,XRCC5,CCT4,CD44,RHOA,PPP2CA,PPIA,ACSL1,PTGES3
GO:0006954	Inflammatory response	21	538	3.90335	0.33	0.0393	9606.ENSP00000245907,9606.ENSP00000253496,9606.ENSP00000259396,9606.ENSP00000264690,9606.ENSP00000273784,9606.ENSP00000296028,9606.ENSP00000298223,9606.ENSP00000304592,9606.ENSP00000308541,9606.ENSP00000321853,9606.ENSP00000323929,9606.ENSP00000340278,9606.ENSP00000345347,9606.ENSP00000348170,9606.ENSP00000353099,9606.ENSP00000356969,9606.ENSP00000363827,9606.ENSP00000366109,9606.ENSP00000379350,…	C3,F12,ORM1,KLKB1,AHSG,PPBP,FOLR2,FASN,F2,SERPINF2,A2M,PARK7,HMGB1,HP,HLA-DRB1,APOA2,HSPG2,ANXA1,ITGB1,CD14,CD44
GO:0009056	Catabolic process	75	1976	3.79555	0.32	5.73e-07	9606.ENSP00000044462,9606.ENSP00000216714,9606.ENSP00000221418,9606.ENSP00000221566,9606.ENSP00000222219,9606.ENSP00000223136,9606.ENSP00000225275,9606.ENSP00000225371,9606.ENSP00000228740,9606.ENSP00000229268,9606.ENSP00000236671,9606.ENSP00000241052,9606.ENSP00000245206,9606.ENSP00000258317,9606.ENSP00000261733,9606.ENSP00000263368,9606.ENSP00000263579,9606.ENSP00000265132,9606.ENSP00000268058,…	PSMA4,APEX1,ECH1,SGTA,DNASE2,FIS1,MPO,EPX,LTA4H,USP5,CTSD,CAT,GOT2,NPL,ALDH2,BLVRB,DCPS,AMBP,PML,COPS3,PFKL,CISD2,GLUD1,GPD1L,LPCAT1,ACAA2,PGLYRP2,PRDX3,HPRT1,DDB1,HINT1,HNRNPD,PKM,CALR,HADHB,HSP90AA1,PARK7,MAOA,PRDX6,HMGB1,CTSB,SND1,GSTM3,COMT,APOA2,BAG3,CTBS,PGAM1,PGM1,PGK1,HMGCL,HSPA1A,ESD,HADHA,QPRT,GAPDH,HAGH,PCYOX1,OGDH,CD44,GPI,MPST,PDCD6IP,ACSL1,RNH1,HSPA8,ENO2,PAFAH1B3,CLTC,EPHX1,SAMHD1,…
GO:0051247	Positive regulation of protein metabolic process	58	1512	3.83598	0.32	1.73e-05	9606.ENSP00000215832,9606.ENSP00000216181,9606.ENSP00000216802,9606.ENSP00000221419,9606.ENSP00000221566,9606.ENSP00000223136,9606.ENSP00000225698,9606.ENSP00000229268,9606.ENSP00000231751,9606.ENSP00000236671,9606.ENSP00000245907,9606.ENSP00000247970,9606.ENSP00000253039,9606.ENSP00000253496,9606.ENSP00000264690,9606.ENSP00000265983,9606.ENSP00000268058,9606.ENSP00000268182,9606.ENSP00000278572,…	MAPK1,MYH9,PSME2,HNRNPL,SGTA,FIS1,C1QBP,USP5,LTF,CTSD,C3,PIN1,EIF2S3,F12,KLKB1,HPX,PML,IQGAP1,RPS3,LPCAT1,VPS35,DDB1,EEF2,F2,HNRNPD,RAP2B,PKM,FBN1,HSP90AA1,SF3B1,EZR,CAV1,HSPD1,PARK7,RPS2,HMGB1,ANXA2,CRKL,HLA-DRB1,LMNA,RPL5,HSP90AB1,RPS4X,PEF1,TXN,HSPA1A,XRCC5,MTPN,CD44,RHOA,EIF4G1,PPP2CA,PPIA,ACSL1,RACK1,SPON1,ENO1,MYO1C
GO:0046907	Intracellular transport	52	1365	3.80952	0.32	7.1e-05	9606.ENSP00000219150,9606.ENSP00000221566,9606.ENSP00000223136,9606.ENSP00000252699,9606.ENSP00000261263,9606.ENSP00000261574,9606.ENSP00000265709,9606.ENSP00000268058,9606.ENSP00000270142,9606.ENSP00000271064,9606.ENSP00000285093,9606.ENSP00000299138,9606.ENSP00000303366,9606.ENSP00000305230,9606.ENSP00000306330,9606.ENSP00000309415,9606.ENSP00000320866,9606.ENSP00000325002,9606.ENSP00000329419,…	CORO1A,SGTA,FIS1,ACTN4,RAB21,IPO5,ANK1,PML,SOD1,TINAGL1,ACAA2,VPS35,LMAN2,SRP9,YWHAG,CLTB,CALR,COPG1,COPB2,TMED9,LAMP1,HSP90AA1,SEC23B,HSPD1,VAPA,DYNC1H1,COPA,PEX19,LMNA,BAG3,FLNA,VDAC2,PEF1,HSPA1A,IPO7,YWHAQ,SEC13,AP1G1,PSAP,SEC31A,XPO1,TMED7,DDX39B,HSPA8,TUBA1C,NPC2,COPE,F8A3,CLTC,SNX12,AP2B1,MYO1C
GO:0071495	Cellular response to endogenous stimulus	42	1103	3.8078	0.32	0.00061	9606.ENSP00000215832,9606.ENSP00000216714,9606.ENSP00000219150,9606.ENSP00000254722,9606.ENSP00000258198,9606.ENSP00000261574,9606.ENSP00000267257,9606.ENSP00000268058,9606.ENSP00000268182,9606.ENSP00000270142,9606.ENSP00000298223,9606.ENSP00000306099,9606.ENSP00000306330,9606.ENSP00000313199,9606.ENSP00000320171,9606.ENSP00000320866,9606.ENSP00000324422,9606.ENSP00000325527,9606.ENSP00000328359,…	MAPK1,APEX1,CORO1A,SERPINF1,DYNC1LI2,IPO5,PXN,PML,IQGAP1,SOD1,FOLR2,FGB,YWHAG,HNRNPD,PKM,CALR,ZYX,FBN1,DEFA3,LIMS1,EZR,EEF1A1,CAV1,CTSB,CRKL,COL4A2,COL6A1,LAMTOR2,FLNA,HSPA1A,ANXA1,GNB1,AKR1C1,DNM2,GRB2,FOLR1,CSTF2,CD44,RHOA,ACSL1,HSPA8,PTGES3
GO:0051241	Negative regulation of multicellular organismal process	40	1035	3.86473	0.32	0.00071	9606.ENSP00000205948,9606.ENSP00000225371,9606.ENSP00000225698,9606.ENSP00000231751,9606.ENSP00000253496,9606.ENSP00000254722,9606.ENSP00000259396,9606.ENSP00000264690,9606.ENSP00000268058,9606.ENSP00000270142,9606.ENSP00000273784,9606.ENSP00000292609,9606.ENSP00000306099,9606.ENSP00000308541,9606.ENSP00000312999,9606.ENSP00000320866,9606.ENSP00000321853,9606.ENSP00000325527,9606.ENSP00000336829,…	APOH,EPX,C1QBP,LTF,F12,SERPINF1,ORM1,KLKB1,PML,SOD1,AHSG,PGLYRP2,FGB,F2,GNAI2,CALR,SERPINF2,FBN1,FGG,EZR,HMGB1,ANXA2,HLA-DRB1,COL4A2,APOA2,LMNA,TACSTD2,HSP90AB1,PGK1,HSPG2,ANXA1,EMILIN1,G6PD,EFEMP1,GDI1,RHOA,PPP2CA,BANF1,EPPK1,FGA
GO:2000145	Regulation of cell motility	38	988	3.84615	0.32	0.0012	9606.ENSP00000205948,9606.ENSP00000215832,9606.ENSP00000216714,9606.ENSP00000219150,9606.ENSP00000225655,9606.ENSP00000225698,9606.ENSP00000247970,9606.ENSP00000252699,9606.ENSP00000252999,9606.ENSP00000254722,9606.ENSP00000264908,9606.ENSP00000279227,9606.ENSP00000312999,9606.ENSP00000319096,9606.ENSP00000320866,9606.ENSP00000339191,9606.ENSP00000345347,9606.ENSP00000346300,9606.ENSP00000353731,…	APOH,MAPK1,APEX1,CORO1A,PFN1,C1QBP,PIN1,ACTN4,LAMA5,SERPINF1,ANXA3,FERMT3,GNAI2,RAP2B,CALR,CAV1,HMGB1,CRKL,DPP4,AFDN,LMNA,MPP1,FLNA,TACSTD2,CLIC4,ANXA1,EMILIN1,ITGB1,DDT,TF,RHOA,GPI,RACK1,DNM1L,CNN2,ACTG1,EPPK1,MYO1C
GO:0001817	Regulation of cytokine production	28	739	3.7889	0.32	0.0131	9606.ENSP00000225371,9606.ENSP00000225698,9606.ENSP00000231751,9606.ENSP00000245907,9606.ENSP00000259396,9606.ENSP00000268058,9606.ENSP00000268182,9606.ENSP00000270142,9606.ENSP00000278572,9606.ENSP00000292609,9606.ENSP00000308541,9606.ENSP00000321853,9606.ENSP00000335153,9606.ENSP00000338934,9606.ENSP00000340019,9606.ENSP00000340278,9606.ENSP00000345347,9606.ENSP00000349259,9606.ENSP00000353099,…	EPX,C1QBP,LTF,C3,ORM1,PML,IQGAP1,SOD1,RPS3,PGLYRP2,F2,SERPINF2,HSP90AA1,EZR,HSPD1,PARK7,HMGB1,SPTBN1,HLA-DRB1,APOA2,HSP90AB1,HSPA1A,ANXA1,GAPDH,DDT,CD14,BANF1,STING1
GO:0071345	Cellular response to cytokine stimulus	27	711	3.79747	0.32	0.0155	9606.ENSP00000215832,9606.ENSP00000219150,9606.ENSP00000252699,9606.ENSP00000265983,9606.ENSP00000268058,9606.ENSP00000278572,9606.ENSP00000296028,9606.ENSP00000300289,9606.ENSP00000304592,9606.ENSP00000306099,9606.ENSP00000324422,9606.ENSP00000336829,9606.ENSP00000337598,9606.ENSP00000339191,9606.ENSP00000346300,9606.ENSP00000360609,9606.ENSP00000375978,9606.ENSP00000380070,9606.ENSP00000386284,…	MAPK1,CORO1A,ACTN4,HPX,PML,RPS3,PPBP,PDIA3,FASN,FGB,ZYX,FGG,LIMS1,CAV1,CRKL,HSP90AB1,XRCC5,GAPDH,ALAD,CD44,RHOA,FLNB,ACSL1,ACTG1,PRPF8,MYO1C,STING1
GO:0040017	Positive regulation of locomotion	22	570	3.85965	0.32	0.0354	9606.ENSP00000215832,9606.ENSP00000219150,9606.ENSP00000225655,9606.ENSP00000225698,9606.ENSP00000252699,9606.ENSP00000264908,9606.ENSP00000279227,9606.ENSP00000299138,9606.ENSP00000312999,9606.ENSP00000320866,9606.ENSP00000339191,9606.ENSP00000345347,9606.ENSP00000346300,9606.ENSP00000366109,9606.ENSP00000379350,9606.ENSP00000385834,9606.ENSP00000400175,9606.ENSP00000405573,9606.ENSP00000426909,…	MAPK1,CORO1A,PFN1,C1QBP,ACTN4,ANXA3,FERMT3,VPS35,GNAI2,CALR,CAV1,HMGB1,CRKL,ANXA1,ITGB1,TF,RHOA,GPI,RACK1,DNM1L,ACTG1,MYO1C
GO:0051128	Regulation of cellular component organization	88	2365	3.72093	0.31	6.42e-08	9606.ENSP00000215832,9606.ENSP00000216181,9606.ENSP00000219150,9606.ENSP00000223136,9606.ENSP00000225655,9606.ENSP00000245907,9606.ENSP00000246069,9606.ENSP00000247970,9606.ENSP00000254722,9606.ENSP00000254810,9606.ENSP00000258091,9606.ENSP00000261263,9606.ENSP00000264758,9606.ENSP00000267257,9606.ENSP00000268058,9606.ENSP00000268182,9606.ENSP00000278572,9606.ENSP00000280326,9606.ENSP00000285093,…	MAPK1,MYH9,CORO1A,FIS1,PFN1,C3,DSTN,PIN1,SERPINF1,H3-3B,CCT7,RAB21,ADD1,PXN,PML,IQGAP1,RPS3,CCT5,ACAA2,CCT3,VPS35,F2,RBM14,HNRNPD,TLN1,CALR,SERPINF2,TMED9,HSP90AA1,LIMS1,EZR,CAV1,PARK7,SFN,HMGB1,ANXA2,CRKL,WARS1,DYNC1H1,SPTBN1,MAP4,DPP4,NCKAP1,CAPZA2,APOA2,LMNA,LAMTOR2,FLNA,TACSTD2,VDAC2,CLIC4,HSPG2,HSPA1A,ANXA1,GDI2,EMILIN1,DNM2,XRCC5,GRB2,MTPN,G6PD,CCT4,LCP1,XPO1,CD14,TF,ARPC1B,SEPTIN9,GDI1,CD4…
GO:0043067	Regulation of programmed cell death	56	1492	3.75335	0.31	4.75e-05	9606.ENSP00000205948,9606.ENSP00000216714,9606.ENSP00000219150,9606.ENSP00000223136,9606.ENSP00000225275,9606.ENSP00000225698,9606.ENSP00000231751,9606.ENSP00000236671,9606.ENSP00000241052,9606.ENSP00000245907,9606.ENSP00000252699,9606.ENSP00000261772,9606.ENSP00000263579,9606.ENSP00000268058,9606.ENSP00000270142,9606.ENSP00000278572,9606.ENSP00000285093,9606.ENSP00000285930,9606.ENSP00000295897,…	APOH,APEX1,CORO1A,FIS1,MPO,C1QBP,LTF,CTSD,CAT,C3,ACTN4,AARS1,DCPS,PML,SOD1,RPS3,ACAA2,AKR1B1,ALB,PRDX3,PDIA3,DDB1,PA2G4,FGB,GNAI2,CALR,HSP90AA1,FGG,CAV1,HSPD1,PARK7,SFN,HMGB1,CTSB,LMNA,BAG3,FLNA,HSP90AB1,VDAC2,GLO1,HSPA1A,ANXA1,DNM2,NME2,G6PD,ACTN1,ITGB1,CD44,RHOA,GPI,PPIA,RACK1,DNM1L,TPT1,ENO1,FGA
GO:0042981	Regulation of apoptotic process	55	1462	3.76197	0.31	5.35e-05	9606.ENSP00000205948,9606.ENSP00000216714,9606.ENSP00000219150,9606.ENSP00000223136,9606.ENSP00000225275,9606.ENSP00000225698,9606.ENSP00000231751,9606.ENSP00000236671,9606.ENSP00000241052,9606.ENSP00000245907,9606.ENSP00000252699,9606.ENSP00000261772,9606.ENSP00000268058,9606.ENSP00000270142,9606.ENSP00000278572,9606.ENSP00000285093,9606.ENSP00000285930,9606.ENSP00000295897,9606.ENSP00000298510,…	APOH,APEX1,CORO1A,FIS1,MPO,C1QBP,LTF,CTSD,CAT,C3,ACTN4,AARS1,PML,SOD1,RPS3,ACAA2,AKR1B1,ALB,PRDX3,PDIA3,DDB1,PA2G4,FGB,GNAI2,CALR,HSP90AA1,FGG,CAV1,HSPD1,PARK7,SFN,HMGB1,CTSB,LMNA,BAG3,FLNA,HSP90AB1,VDAC2,GLO1,HSPA1A,ANXA1,DNM2,NME2,G6PD,ACTN1,ITGB1,CD44,RHOA,GPI,PPIA,RACK1,DNM1L,TPT1,ENO1,FGA
GO:0044092	Negative regulation of molecular function	43	1143	3.76203	0.31	0.00063	9606.ENSP00000231751,9606.ENSP00000241052,9606.ENSP00000245907,9606.ENSP00000247970,9606.ENSP00000254722,9606.ENSP00000261313,9606.ENSP00000261574,9606.ENSP00000262418,9606.ENSP00000264908,9606.ENSP00000265132,9606.ENSP00000268058,9606.ENSP00000268182,9606.ENSP00000273784,9606.ENSP00000295550,9606.ENSP00000298510,9606.ENSP00000306330,9606.ENSP00000312999,9606.ENSP00000321853,9606.ENSP00000323856,…	LTF,CAT,C3,PIN1,SERPINF1,PEBP1,IPO5,SLC4A1,ANXA3,AMBP,PML,IQGAP1,AHSG,COL6A3,PRDX3,YWHAG,GNAI2,SERPINF2,PLEC,A2M,CAV1,PARK7,SFN,CTSB,ANXA2,WARS1,HP,APOA2,PEX19,CLIC2,FLNA,RPL5,ANXA1,IPO7,MVP,GAPDH,CD44,GPI,PPIA,RACK1,RNH1,CAND1,SERPINB6
GO:1901698	Response to nitrogen compound	40	1058	3.78072	0.31	0.0011	9606.ENSP00000215832,9606.ENSP00000216714,9606.ENSP00000221419,9606.ENSP00000221566,9606.ENSP00000228740,9606.ENSP00000241052,9606.ENSP00000254722,9606.ENSP00000261574,9606.ENSP00000267257,9606.ENSP00000270142,9606.ENSP00000298223,9606.ENSP00000298556,9606.ENSP00000306330,9606.ENSP00000312999,9606.ENSP00000313199,9606.ENSP00000317159,9606.ENSP00000320171,9606.ENSP00000320866,9606.ENSP00000325527,…	MAPK1,APEX1,HNRNPL,SGTA,LTA4H,CAT,SERPINF1,IPO5,PXN,SOD1,FOLR2,HPRT1,YWHAG,GNAI2,HNRNPD,CYC1,PKM,CALR,FBN1,HSP90AA1,EZR,CAV1,CRKL,GSTM3,COL6A1,LAMTOR2,FLNA,HSP90AB1,TXN,ANXA1,GNB1,HADHA,DNM2,GRB2,FOLR1,ITGB1,ALAD,RHOA,GPI,STING1
GO:0040012	Regulation of locomotion	39	1032	3.77907	0.31	0.0014	9606.ENSP00000205948,9606.ENSP00000215832,9606.ENSP00000216714,9606.ENSP00000219150,9606.ENSP00000225655,9606.ENSP00000225698,9606.ENSP00000247970,9606.ENSP00000252699,9606.ENSP00000252999,9606.ENSP00000254722,9606.ENSP00000264908,9606.ENSP00000279227,9606.ENSP00000299138,9606.ENSP00000312999,9606.ENSP00000319096,9606.ENSP00000320866,9606.ENSP00000339191,9606.ENSP00000345347,9606.ENSP00000346300,…	APOH,MAPK1,APEX1,CORO1A,PFN1,C1QBP,PIN1,ACTN4,LAMA5,SERPINF1,ANXA3,FERMT3,VPS35,GNAI2,RAP2B,CALR,CAV1,HMGB1,CRKL,DPP4,AFDN,LMNA,MPP1,FLNA,TACSTD2,CLIC4,ANXA1,EMILIN1,ITGB1,DDT,TF,RHOA,GPI,RACK1,DNM1L,CNN2,ACTG1,EPPK1,MYO1C
GO:0048878	Chemical homeostasis	34	904	3.76106	0.31	0.0043	9606.ENSP00000215832,9606.ENSP00000223136,9606.ENSP00000231751,9606.ENSP00000254722,9606.ENSP00000262418,9606.ENSP00000263401,9606.ENSP00000264613,9606.ENSP00000265983,9606.ENSP00000268058,9606.ENSP00000270142,9606.ENSP00000283415,9606.ENSP00000285930,9606.ENSP00000297258,9606.ENSP00000297991,9606.ENSP00000299198,9606.ENSP00000301764,9606.ENSP00000308541,9606.ENSP00000320866,9606.ENSP00000323856,…	MAPK1,FIS1,LTF,SERPINF1,SLC4A1,COMMD9,CP,HPX,PML,SOD1,LPCAT1,AKR1B1,FABP5,AQP3,CKB,DDB1,F2,CALR,PLEC,FBN1,CAV1,PARK7,SFN,ANXA6,APOA2,ATP6V1G1,CLIC4,AKR1C1,TF,GPI,RACK1,ATOX1,NPC2,TPT1
GO:0034645	Cellular macromolecule biosynthetic process	29	778	3.72751	0.31	0.0133	9606.ENSP00000248342,9606.ENSP00000253039,9606.ENSP00000261772,9606.ENSP00000270625,9606.ENSP00000278572,9606.ENSP00000307940,9606.ENSP00000309092,9606.ENSP00000311430,9606.ENSP00000331901,9606.ENSP00000339063,9606.ENSP00000341885,9606.ENSP00000346015,9606.ENSP00000346088,9606.ENSP00000347495,9606.ENSP00000354739,9606.ENSP00000359345,9606.ENSP00000362744,9606.ENSP00000367038,9606.ENSP00000375863,…	EIF3K,EIF2S3,AARS1,RPS11,RPS3,EEF2,GMPPB,RPL4,EEF1G,EEF1A1,RPS2,RPL27A,RPL22,WARS1,RPL12,RPL5,RPS4X,RRBP1,HNRNPUL1,EEF1B2,RPL14,RPSA,EEF1D,EIF4G1,OSTC,RACK1,RPL30,RPS5,PTGES3
GO:0043549	Regulation of kinase activity	29	778	3.72751	0.31	0.0133	9606.ENSP00000231751,9606.ENSP00000261574,9606.ENSP00000268182,9606.ENSP00000270142,9606.ENSP00000278572,9606.ENSP00000298510,9606.ENSP00000306330,9606.ENSP00000308541,9606.ENSP00000319096,9606.ENSP00000323856,9606.ENSP00000325527,9606.ENSP00000335153,9606.ENSP00000339063,9606.ENSP00000339191,9606.ENSP00000340278,9606.ENSP00000340989,9606.ENSP00000347495,9606.ENSP00000353099,9606.ENSP00000360609,…	LTF,IPO5,IQGAP1,SOD1,RPS3,PRDX3,YWHAG,F2,RAP2B,PLEC,FBN1,HSP90AA1,EEF1A1,CAV1,PARK7,SFN,WARS1,HLA-DRB1,HSP90AB1,TXN,IPO7,XRCC5,MVP,CD44,RHOA,PPP2CA,PPIA,ACSL1,RACK1
GO:0002520	Immune system development	28	749	3.73832	0.31	0.0155	9606.ENSP00000215832,9606.ENSP00000216181,9606.ENSP00000222219,9606.ENSP00000262418,9606.ENSP00000268058,9606.ENSP00000270142,9606.ENSP00000298510,9606.ENSP00000304592,9606.ENSP00000307940,9606.ENSP00000340019,9606.ENSP00000345347,9606.ENSP00000346032,9606.ENSP00000346088,9606.ENSP00000346300,9606.ENSP00000353099,9606.ENSP00000358866,9606.ENSP00000362463,9606.ENSP00000366109,9606.ENSP00000375978,…	MAPK1,MYH9,DNASE2,SLC4A1,PML,SOD1,PRDX3,FASN,EEF2,HSPD1,HMGB1,ANXA2,RPL22,CRKL,HLA-DRB1,FLNA,GLO1,ANXA1,XRCC5,G6PD,ACTN1,ITGB1,TF,RHOA,WDR1,CNN2,SAMHD1,SPTA1
GO:0001775	Cell activation	26	693	3.7518	0.31	0.0216	9606.ENSP00000216181,9606.ENSP00000219150,9606.ENSP00000264908,9606.ENSP00000279227,9606.ENSP00000296411,9606.ENSP00000298556,9606.ENSP00000306099,9606.ENSP00000308541,9606.ENSP00000316029,9606.ENSP00000319096,9606.ENSP00000336829,9606.ENSP00000340019,9606.ENSP00000345347,9606.ENSP00000346088,9606.ENSP00000353731,9606.ENSP00000358866,9606.ENSP00000364935,9606.ENSP00000366109,9606.ENSP00000379350,…	MYH9,CORO1A,ANXA3,FERMT3,METAP1,HPRT1,FGB,F2,TLN1,RAP2B,FGG,HSPD1,HMGB1,RPL22,DPP4,FLNA,CLIC1,ANXA1,ITGB1,LCP1,CD44,RHOA,PPIA,ACTG1,HBB,FGA
GO:0070887	Cellular response to chemical stimulus	96	2609	3.67957	0.3	2.08e-08	9606.ENSP00000215832,9606.ENSP00000216714,9606.ENSP00000219150,9606.ENSP00000225275,9606.ENSP00000225371,9606.ENSP00000241052,9606.ENSP00000252699,9606.ENSP00000254722,9606.ENSP00000258198,9606.ENSP00000261574,9606.ENSP00000263579,9606.ENSP00000264758,9606.ENSP00000265132,9606.ENSP00000265983,9606.ENSP00000267257,9606.ENSP00000268058,9606.ENSP00000268182,9606.ENSP00000270142,9606.ENSP00000278572,…	MAPK1,APEX1,CORO1A,MPO,EPX,CAT,ACTN4,SERPINF1,DYNC1LI2,IPO5,DCPS,ADD1,AMBP,HPX,PXN,PML,IQGAP1,SOD1,RPS3,ACAA2,AKR1B1,ALB,PPBP,AQP3,FOLR2,PRDX3,PDIA3,FASN,FGB,YWHAG,GNAI2,HNRNPD,PKM,CALR,PLEC,ZYX,HADHB,FBN1,DEFA3,FGG,LIMS1,EZR,EEF1A1,CAV1,HSPD1,PARK7,PRDX6,HMGB1,CTSB,CRKL,HP,COL4A2,GSTM3,COL6A1,MGST3,LMNA,LAMTOR2,BAG3,CLIC2,FLNA,HSP90AB1,PGK1,ATP6V1G1,CLIC4,TXN,HSPA1A,ANXA1,GNB1,ESD,AKR1C1,DNM2,XR…
GO:0051649	Establishment of localization in cell	64	1756	3.64465	0.3	1.95e-05	9606.ENSP00000216181,9606.ENSP00000219150,9606.ENSP00000221566,9606.ENSP00000223136,9606.ENSP00000252699,9606.ENSP00000261263,9606.ENSP00000261574,9606.ENSP00000264908,9606.ENSP00000265709,9606.ENSP00000268058,9606.ENSP00000269886,9606.ENSP00000270142,9606.ENSP00000271064,9606.ENSP00000285093,9606.ENSP00000297991,9606.ENSP00000299138,9606.ENSP00000303366,9606.ENSP00000305230,9606.ENSP00000306330,…	MYH9,CORO1A,SGTA,FIS1,ACTN4,RAB21,IPO5,ANXA3,ANK1,PML,SH3GL1,SOD1,TINAGL1,ACAA2,AQP3,VPS35,LMAN2,SRP9,YWHAG,CLTB,CALR,COPG1,COPB2,TMED9,LAMP1,HSP90AA1,SEC23B,EZR,CAV1,HSPD1,PARK7,VAPA,DYNC1H1,MAP4,COPA,PEX19,LMNA,BAG3,FLNA,VDAC2,PEF1,HSPA1A,IPO7,YWHAQ,SEC13,DNM2,AP1G1,PSAP,SEC31A,ITGB1,XPO1,TMED7,DDX39B,HSPA8,TUBA1C,NPC2,CNN2,ACTG1,COPE,F8A3,CLTC,SNX12,AP2B1,MYO1C
GO:1901575	Organic substance catabolic process	62	1686	3.67734	0.3	2.25e-05	9606.ENSP00000044462,9606.ENSP00000216714,9606.ENSP00000221418,9606.ENSP00000221566,9606.ENSP00000222219,9606.ENSP00000228740,9606.ENSP00000229268,9606.ENSP00000236671,9606.ENSP00000245206,9606.ENSP00000258317,9606.ENSP00000261733,9606.ENSP00000263368,9606.ENSP00000263579,9606.ENSP00000265132,9606.ENSP00000268058,9606.ENSP00000268717,9606.ENSP00000269848,9606.ENSP00000277865,9606.ENSP00000282541,…	PSMA4,APEX1,ECH1,SGTA,DNASE2,LTA4H,USP5,CTSD,GOT2,NPL,ALDH2,BLVRB,DCPS,AMBP,PML,COPS3,PFKL,GLUD1,GPD1L,LPCAT1,ACAA2,PGLYRP2,HPRT1,DDB1,HINT1,HNRNPD,PKM,CALR,HADHB,HSP90AA1,PARK7,MAOA,PRDX6,CTSB,SND1,COMT,APOA2,BAG3,CTBS,PGAM1,PGM1,PGK1,HMGCL,HSPA1A,ESD,HADHA,QPRT,GAPDH,HAGH,PCYOX1,OGDH,CD44,GPI,MPST,PDCD6IP,RNH1,HSPA8,ENO2,PAFAH1B3,SAMHD1,ENO1,ALDOA
GO:0042592	Homeostatic process	52	1406	3.69844	0.3	0.00014	9606.ENSP00000215832,9606.ENSP00000216714,9606.ENSP00000219150,9606.ENSP00000222219,9606.ENSP00000223136,9606.ENSP00000231751,9606.ENSP00000254722,9606.ENSP00000262418,9606.ENSP00000263401,9606.ENSP00000264613,9606.ENSP00000265983,9606.ENSP00000268058,9606.ENSP00000270142,9606.ENSP00000283415,9606.ENSP00000285930,9606.ENSP00000295897,9606.ENSP00000297258,9606.ENSP00000297991,9606.ENSP00000298510,…	MAPK1,APEX1,CORO1A,DNASE2,FIS1,LTF,SERPINF1,SLC4A1,COMMD9,CP,HPX,PML,SOD1,LPCAT1,AKR1B1,ALB,FABP5,AQP3,PRDX3,CKB,DDB1,F2,CALR,PLEC,FBN1,CAV1,PARK7,SFN,PRDX6,HMGB1,ANXA6,APOA2,BAG3,ATP6V1G1,CLIC4,TXN,ANXA1,AKR1C1,G6PD,ERO1A,ITGB1,TF,GPI,EIF4G1,RACK1,ATOX1,JCHAIN,NPC2,ACTG1,TPT1,SPTA1,ALDOA
GO:0043933	Protein-containing complex organization	53	1465	3.61775	0.3	0.00019	9606.ENSP00000210313,9606.ENSP00000225275,9606.ENSP00000246069,9606.ENSP00000248342,9606.ENSP00000253039,9606.ENSP00000254810,9606.ENSP00000263408,9606.ENSP00000267257,9606.ENSP00000268058,9606.ENSP00000269886,9606.ENSP00000279227,9606.ENSP00000295688,9606.ENSP00000298556,9606.ENSP00000300289,9606.ENSP00000303920,9606.ENSP00000306099,9606.ENSP00000316029,9606.ENSP00000320866,9606.ENSP00000323856,…	PSMD5,MPO,DSTN,EIF3K,EIF2S3,H3-3B,C9,PXN,PML,SH3GL1,FERMT3,CCT3,HPRT1,PDIA3,MZB1,FGB,TLN1,CALR,PLEC,HSP90AA1,SF3B1,FGG,HSPD1,SNRPD2,ALDH9A1,HLA-DRB1,CAPZA2,AFDN,APOA2,RPL5,HSP90AB1,PEF1,HSPA1A,XRCC5,MYH11,ALAD,RPSA,SNRPG,PDCD6IP,DDX39B,WDR1,HSPA8,JCHAIN,CAND1,DNM1L,PRPF8,RPS5,CLTC,PTGES3,SAMHD1,ALDOA,FGA,STING1
GO:0010243	Response to organonitrogen compound	35	963	3.63448	0.3	0.0059	9606.ENSP00000215832,9606.ENSP00000216714,9606.ENSP00000221419,9606.ENSP00000221566,9606.ENSP00000228740,9606.ENSP00000241052,9606.ENSP00000254722,9606.ENSP00000261574,9606.ENSP00000267257,9606.ENSP00000270142,9606.ENSP00000298223,9606.ENSP00000298556,9606.ENSP00000306330,9606.ENSP00000313199,9606.ENSP00000317159,9606.ENSP00000320171,9606.ENSP00000320866,9606.ENSP00000325527,9606.ENSP00000335153,…	MAPK1,APEX1,HNRNPL,SGTA,LTA4H,CAT,SERPINF1,IPO5,PXN,SOD1,FOLR2,HPRT1,YWHAG,HNRNPD,CYC1,PKM,CALR,FBN1,HSP90AA1,EZR,CAV1,COL6A1,LAMTOR2,FLNA,HSP90AB1,ANXA1,GNB1,HADHA,DNM2,GRB2,FOLR1,ITGB1,ALAD,RHOA,GPI
GO:0033993	Response to lipid	30	827	3.62757	0.3	0.0156	9606.ENSP00000215832,9606.ENSP00000225275,9606.ENSP00000241052,9606.ENSP00000254722,9606.ENSP00000264908,9606.ENSP00000296028,9606.ENSP00000297991,9606.ENSP00000298510,9606.ENSP00000313199,9606.ENSP00000320866,9606.ENSP00000323929,9606.ENSP00000325136,9606.ENSP00000328359,9606.ENSP00000339191,9606.ENSP00000345347,9606.ENSP00000356969,9606.ENSP00000364802,9606.ENSP00000366109,9606.ENSP00000370254,…	MAPK1,MPO,CAT,SERPINF1,ANXA3,PPBP,AQP3,PRDX3,HNRNPD,CALR,A2M,HADHB,DEFA3,CAV1,HMGB1,APOA2,HSPA1A,ANXA1,AKR1C1,XRCC5,CD14,ALAD,ARPC1B,RHOA,GPI,ACSL1,HSPA8,ENO2,PRPF8,PTGES3
GO:0048534	Hematopoietic or lymphoid organ development	26	705	3.68794	0.3	0.0266	9606.ENSP00000215832,9606.ENSP00000216181,9606.ENSP00000222219,9606.ENSP00000262418,9606.ENSP00000268058,9606.ENSP00000270142,9606.ENSP00000298510,9606.ENSP00000304592,9606.ENSP00000307940,9606.ENSP00000345347,9606.ENSP00000346032,9606.ENSP00000346088,9606.ENSP00000346300,9606.ENSP00000353099,9606.ENSP00000358866,9606.ENSP00000362463,9606.ENSP00000366109,9606.ENSP00000375978,9606.ENSP00000377192,…	MAPK1,MYH9,DNASE2,SLC4A1,PML,SOD1,PRDX3,FASN,EEF2,HMGB1,ANXA2,RPL22,CRKL,HLA-DRB1,FLNA,GLO1,ANXA1,XRCC5,G6PD,ACTN1,ITGB1,TF,RHOA,WDR1,CNN2,SPTA1
GO:0045859	Regulation of protein kinase activity	24	663	3.61991	0.3	0.0468	9606.ENSP00000231751,9606.ENSP00000261574,9606.ENSP00000268182,9606.ENSP00000270142,9606.ENSP00000278572,9606.ENSP00000306330,9606.ENSP00000319096,9606.ENSP00000323856,9606.ENSP00000325527,9606.ENSP00000335153,9606.ENSP00000339191,9606.ENSP00000340278,9606.ENSP00000340989,9606.ENSP00000347495,9606.ENSP00000360609,9606.ENSP00000363641,9606.ENSP00000369042,9606.ENSP00000375978,9606.ENSP00000378760,…	LTF,IPO5,IQGAP1,SOD1,RPS3,YWHAG,RAP2B,PLEC,FBN1,HSP90AA1,CAV1,PARK7,SFN,WARS1,HSP90AB1,TXN,IPO7,XRCC5,MVP,RHOA,PPP2CA,PPIA,ACSL1,RACK1
GO:0065008	Regulation of biological quality	131	3654	3.58511	0.29	2e-11	9606.ENSP00000205948,9606.ENSP00000215832,9606.ENSP00000216181,9606.ENSP00000216714,9606.ENSP00000219150,9606.ENSP00000222219,9606.ENSP00000223136,9606.ENSP00000225655,9606.ENSP00000231751,9606.ENSP00000246069,9606.ENSP00000247970,9606.ENSP00000253039,9606.ENSP00000253496,9606.ENSP00000254722,9606.ENSP00000258091,9606.ENSP00000261263,9606.ENSP00000261772,9606.ENSP00000262418,9606.ENSP00000263401,…	APOH,MAPK1,MYH9,APEX1,CORO1A,DNASE2,FIS1,PFN1,LTF,DSTN,PIN1,EIF2S3,F12,SERPINF1,CCT7,RAB21,AARS1,SLC4A1,COMMD9,DCPS,CP,KLKB1,ADD1,HPX,PML,PFKL,SOD1,GLUD1,FERMT3,CCT5,GPD1L,LPCAT1,ACAA2,AKR1B1,CCT3,ALB,METAP1,FABP5,AQP3,PRDX3,VPS35,CKB,DDB1,FGB,YWHAG,ADH1B,F2,GNAI2,HNRNPD,TLN1,RAP2B,CALR,SERPINF2,PLEC,FBN1,LAMP1,HSP90AA1,FGG,EZR,CAV1,HSPD1,PARK7,MAOA,SFN,PRDX6,HMGB1,CTSB,ANXA2,ANXA6,ALDH9A1,DYNC1H…
GO:0010033	Response to organic substance	97	2692	3.60327	0.29	4.13e-08	9606.ENSP00000215832,9606.ENSP00000216714,9606.ENSP00000219150,9606.ENSP00000221419,9606.ENSP00000221566,9606.ENSP00000225275,9606.ENSP00000228740,9606.ENSP00000241052,9606.ENSP00000245206,9606.ENSP00000252699,9606.ENSP00000253496,9606.ENSP00000254722,9606.ENSP00000258198,9606.ENSP00000261574,9606.ENSP00000263579,9606.ENSP00000264908,9606.ENSP00000265983,9606.ENSP00000267257,9606.ENSP00000268058,…	MAPK1,APEX1,CORO1A,HNRNPL,SGTA,MPO,LTA4H,CAT,GOT2,ACTN4,F12,SERPINF1,DYNC1LI2,IPO5,DCPS,ANXA3,HPX,PXN,PML,IQGAP1,PFKL,SOD1,RPS3,PPBP,AQP3,FOLR2,PRDX3,HPRT1,PDIA3,FASN,FGB,YWHAG,RBM14,GNAI2,HNRNPD,CYC1,PKM,CALR,A2M,ZYX,HADHB,FBN1,DEFA3,HSP90AA1,FGG,LIMS1,EZR,EEF1A1,CAV1,HSPD1,PARK7,HMGB1,CTSB,CRKL,COL4A2,GSTM3,COL6A1,APOA2,LAMTOR2,BAG3,FLNA,HSP90AB1,RPS4X,HSPA1A,ANXA1,GNB1,ESD,HADHA,AKR1C1,DNM2,XR…
GO:0009605	Response to external stimulus	85	2355	3.60934	0.29	4.04e-07	9606.ENSP00000215832,9606.ENSP00000219150,9606.ENSP00000221419,9606.ENSP00000225275,9606.ENSP00000225371,9606.ENSP00000225698,9606.ENSP00000231751,9606.ENSP00000241052,9606.ENSP00000245907,9606.ENSP00000252999,9606.ENSP00000253496,9606.ENSP00000263408,9606.ENSP00000263579,9606.ENSP00000264908,9606.ENSP00000265983,9606.ENSP00000268058,9606.ENSP00000270142,9606.ENSP00000280326,9606.ENSP00000292609,…	MAPK1,CORO1A,HNRNPL,MPO,EPX,C1QBP,LTF,CAT,C3,LAMA5,F12,C9,DCPS,ANXA3,HPX,PML,SOD1,CCT5,PGLYRP2,ALB,PPBP,AQP3,FOLR2,PRDX3,FGB,F2,RBM14,GNAI2,CALR,PLEC,A2M,ZYX,HADHB,FBN1,DEFA3,EEF1G,HSP90AA1,CAV1,PPL,HMGB1,CRKL,HP,HLA-DRB1,DPP4,COMT,CFH,BAG3,CNPY3,HLA-C,ANXA1,IPO7,HNRNPUL1,XRCC5,MTPN,AP1G1,G6PD,FOLR1,PPP1CB,GAPDH,CD14,TF,ALAD,RHOA,GPI,EIF4G1,CFB,PPIA,FLNB,ACSL1,DPYSL2,RPL30,BANF1,HSPA8,JCHAIN,C1R,…
GO:0002376	Immune system process	76	2121	3.58322	0.29	2.97e-06	9606.ENSP00000215832,9606.ENSP00000216181,9606.ENSP00000219150,9606.ENSP00000222219,9606.ENSP00000225275,9606.ENSP00000225371,9606.ENSP00000225698,9606.ENSP00000231751,9606.ENSP00000236671,9606.ENSP00000245907,9606.ENSP00000253496,9606.ENSP00000262418,9606.ENSP00000263408,9606.ENSP00000264908,9606.ENSP00000265983,9606.ENSP00000268058,9606.ENSP00000270142,9606.ENSP00000292609,9606.ENSP00000296028,…	MAPK1,MYH9,CORO1A,DNASE2,MPO,EPX,C1QBP,LTF,CTSD,C3,F12,SLC4A1,C9,ANXA3,HPX,PML,SOD1,PGLYRP2,PPBP,PRDX3,HPRT1,PDIA3,FASN,FGB,EEF2,F2,RBM14,CALR,PLEC,A2M,ZYX,DEFA3,HSP90AA1,CAV1,HSPD1,HMGB1,ANXA2,RPL22,CRKL,HP,HLA-DRB1,DPP4,CFH,FLNA,CNPY3,GLO1,HLA-C,ANXA1,IPO7,DNM2,XRCC5,G6PD,ACTN1,ITGB1,GAPDH,LCP1,IFI30,CD14,TF,CD44,RHOA,GPI,CFB,PPIA,FLNB,WDR1,RPL30,JCHAIN,C1R,CNN2,ACTG1,SAMHD1,SPTA1,MYO1C,FGA,STI…
GO:0008104	Protein localization	70	1943	3.60268	0.29	8.98e-06	9606.ENSP00000216181,9606.ENSP00000221566,9606.ENSP00000223136,9606.ENSP00000252699,9606.ENSP00000252999,9606.ENSP00000254810,9606.ENSP00000261263,9606.ENSP00000261574,9606.ENSP00000262418,9606.ENSP00000265709,9606.ENSP00000268058,9606.ENSP00000299138,9606.ENSP00000303366,9606.ENSP00000305230,9606.ENSP00000306330,9606.ENSP00000309415,9606.ENSP00000320866,9606.ENSP00000323856,9606.ENSP00000325002,…	MYH9,SGTA,FIS1,ACTN4,LAMA5,H3-3B,RAB21,IPO5,SLC4A1,ANK1,PML,VPS35,LMAN2,SRP9,YWHAG,CLTB,CALR,PLEC,COPG1,FBN1,COPB2,TMED9,LAMP1,HSP90AA1,FGG,LIMS1,SEC23B,EZR,CAV1,HSPD1,PARK7,SFN,VAPA,SPTBN1,AFDN,COPA,PEX19,LMNA,LAMTOR2,BAG3,FLNA,TXN,ANXA1,RRBP1,IPO7,GDI2,YWHAQ,SEC13,DNM2,XRCC5,AP1G1,SEC31A,KTN1,MVP,XPO1,SEPTIN9,GDI1,TMED7,PDCD6IP,SEPTIN11,HSPA8,DNM1L,ACTG1,COPE,CLTC,SEPTIN2,SNX12,AP2B1,MYO1C,CUTA
GO:0044093	Positive regulation of molecular function	57	1587	3.59168	0.29	0.00011	9606.ENSP00000205948,9606.ENSP00000215832,9606.ENSP00000216802,9606.ENSP00000221419,9606.ENSP00000223136,9606.ENSP00000225655,9606.ENSP00000231751,9606.ENSP00000236671,9606.ENSP00000241052,9606.ENSP00000247970,9606.ENSP00000252699,9606.ENSP00000264758,9606.ENSP00000264908,9606.ENSP00000268058,9606.ENSP00000268182,9606.ENSP00000270142,9606.ENSP00000278572,9606.ENSP00000298510,9606.ENSP00000308541,…	APOH,MAPK1,PSME2,HNRNPL,FIS1,PFN1,LTF,CTSD,CAT,PIN1,ACTN4,ADD1,ANXA3,PML,IQGAP1,SOD1,RPS3,PRDX3,F2,GNAI2,HNRNPD,FBN1,HSP90AA1,LIMS1,CAV1,NDUFA4,HSPD1,PARK7,RPS2,HMGB1,ANXA2,CRKL,HLA-DRB1,AFDN,APOA2,CLIC2,HSP90AB1,CAP1,TXN,HSPA1A,DNM2,XRCC5,MTPN,CCT4,PSAP,ITGB1,CD44,RHOA,EIF4G1,PPP2CA,PPIA,ACSL1,RACK1,SPON1,PTGES3,SPTA1,STING1
GO:0071705	Nitrogen compound transport	56	1580	3.5443	0.29	0.00018	9606.ENSP00000216181,9606.ENSP00000221566,9606.ENSP00000223136,9606.ENSP00000252699,9606.ENSP00000261263,9606.ENSP00000261574,9606.ENSP00000265983,9606.ENSP00000268058,9606.ENSP00000297991,9606.ENSP00000298223,9606.ENSP00000299138,9606.ENSP00000303366,9606.ENSP00000305230,9606.ENSP00000306330,9606.ENSP00000309415,9606.ENSP00000320866,9606.ENSP00000325002,9606.ENSP00000329419,9606.ENSP00000330945,…	MYH9,SGTA,FIS1,ACTN4,RAB21,IPO5,HPX,PML,AQP3,FOLR2,VPS35,LMAN2,SRP9,YWHAG,CLTB,CALR,COPG1,COPB2,TMED9,HSP90AA1,FGG,SEC23B,CAV1,HSPD1,PARK7,VAPA,SPTBN1,COPA,PEX19,LMNA,BAG3,ANXA1,RRBP1,IPO7,GDI2,YWHAQ,SEC13,DNM2,AP1G1,FOLR1,PSAP,SEC31A,KTN1,MVP,XPO1,GDI1,TMED7,PDCD6IP,DDX39B,HSPA8,COPE,CLTC,SNX12,AP2B1,HBB,MYO1C
GO:0002682	Regulation of immune system process	51	1438	3.54659	0.29	0.00046	9606.ENSP00000215832,9606.ENSP00000219150,9606.ENSP00000222219,9606.ENSP00000225371,9606.ENSP00000225698,9606.ENSP00000231751,9606.ENSP00000245907,9606.ENSP00000259396,9606.ENSP00000263408,9606.ENSP00000265132,9606.ENSP00000265983,9606.ENSP00000270142,9606.ENSP00000278572,9606.ENSP00000292609,9606.ENSP00000297991,9606.ENSP00000303920,9606.ENSP00000311747,9606.ENSP00000320866,9606.ENSP00000323929,…	MAPK1,CORO1A,DNASE2,EPX,C1QBP,LTF,C3,ORM1,C9,AMBP,HPX,SOD1,RPS3,PGLYRP2,AQP3,MZB1,RBM14,CALR,A2M,FBN1,LAMP1,HSP90AA1,EZR,CAV1,HSPD1,PARK7,HMGB1,CRKL,HLA-DRB1,DPP4,CFH,APOA2,MPP1,HSPA1A,ANXA1,EMILIN1,XRCC5,AP1G1,DDT,CD14,RHOA,GPI,CFB,BANF1,C1R,DNM1L,CNN2,SAMHD1,SPTA1,STING1,CD59
GO:0065003	Protein-containing complex assembly	47	1303	3.60706	0.29	0.00067	9606.ENSP00000210313,9606.ENSP00000248342,9606.ENSP00000253039,9606.ENSP00000254810,9606.ENSP00000263408,9606.ENSP00000267257,9606.ENSP00000268058,9606.ENSP00000279227,9606.ENSP00000295688,9606.ENSP00000298556,9606.ENSP00000300289,9606.ENSP00000303920,9606.ENSP00000306099,9606.ENSP00000316029,9606.ENSP00000320866,9606.ENSP00000335153,9606.ENSP00000335321,9606.ENSP00000336829,9606.ENSP00000340019,…	PSMD5,EIF3K,EIF2S3,H3-3B,C9,PXN,PML,FERMT3,CCT3,HPRT1,PDIA3,MZB1,FGB,TLN1,CALR,HSP90AA1,SF3B1,FGG,HSPD1,SNRPD2,ALDH9A1,HLA-DRB1,CAPZA2,AFDN,APOA2,RPL5,HSP90AB1,PEF1,HSPA1A,XRCC5,MYH11,ALAD,RPSA,SNRPG,PDCD6IP,DDX39B,JCHAIN,CAND1,DNM1L,PRPF8,RPS5,CLTC,PTGES3,SAMHD1,ALDOA,FGA,STING1
GO:0002684	Positive regulation of immune system process	31	874	3.54691	0.29	0.0175	9606.ENSP00000215832,9606.ENSP00000219150,9606.ENSP00000225698,9606.ENSP00000245907,9606.ENSP00000263408,9606.ENSP00000265983,9606.ENSP00000278572,9606.ENSP00000297991,9606.ENSP00000303920,9606.ENSP00000311747,9606.ENSP00000320866,9606.ENSP00000333298,9606.ENSP00000335153,9606.ENSP00000339191,9606.ENSP00000340019,9606.ENSP00000340278,9606.ENSP00000345347,9606.ENSP00000346300,9606.ENSP00000353099,…	MAPK1,CORO1A,C1QBP,C3,C9,HPX,RPS3,AQP3,MZB1,RBM14,CALR,LAMP1,HSP90AA1,CAV1,HSPD1,PARK7,HMGB1,CRKL,HLA-DRB1,DPP4,CFH,ANXA1,XRCC5,AP1G1,RHOA,GPI,CFB,C1R,DNM1L,SPTA1,STING1
GO:0034097	Response to cytokine	29	804	3.60697	0.29	0.02	9606.ENSP00000215832,9606.ENSP00000219150,9606.ENSP00000252699,9606.ENSP00000265983,9606.ENSP00000268058,9606.ENSP00000278572,9606.ENSP00000296028,9606.ENSP00000300289,9606.ENSP00000304592,9606.ENSP00000306099,9606.ENSP00000324422,9606.ENSP00000336829,9606.ENSP00000337598,9606.ENSP00000339191,9606.ENSP00000346300,9606.ENSP00000360609,9606.ENSP00000366109,9606.ENSP00000375978,9606.ENSP00000380070,…	MAPK1,CORO1A,ACTN4,HPX,PML,RPS3,PPBP,PDIA3,FASN,FGB,ZYX,FGG,LIMS1,CAV1,CRKL,HSP90AB1,ANXA1,XRCC5,GAPDH,CD14,ALAD,CD44,RHOA,FLNB,ACSL1,ACTG1,PRPF8,MYO1C,STING1
GO:0044248	Cellular catabolic process	56	1620	3.45679	0.28	0.00034	9606.ENSP00000044462,9606.ENSP00000216714,9606.ENSP00000221418,9606.ENSP00000221566,9606.ENSP00000222219,9606.ENSP00000223136,9606.ENSP00000225275,9606.ENSP00000225371,9606.ENSP00000228740,9606.ENSP00000229268,9606.ENSP00000236671,9606.ENSP00000241052,9606.ENSP00000245206,9606.ENSP00000258317,9606.ENSP00000261733,9606.ENSP00000263368,9606.ENSP00000263579,9606.ENSP00000265132,9606.ENSP00000268058,…	PSMA4,APEX1,ECH1,SGTA,DNASE2,FIS1,MPO,EPX,LTA4H,USP5,CTSD,CAT,GOT2,NPL,ALDH2,BLVRB,DCPS,AMBP,PML,COPS3,CISD2,GLUD1,ACAA2,PRDX3,HPRT1,DDB1,HINT1,HNRNPD,CALR,HADHB,HSP90AA1,PARK7,MAOA,PRDX6,HMGB1,SND1,GSTM3,COMT,APOA2,BAG3,HMGCL,HSPA1A,ESD,HADHA,QPRT,HAGH,PCYOX1,MPST,ACSL1,RNH1,HSPA8,CLTC,EPHX1,SAMHD1,HBB,STING1
GO:1901566	Organonitrogen compound biosynthetic process	47	1338	3.51271	0.28	0.0012	9606.ENSP00000245206,9606.ENSP00000248342,9606.ENSP00000253039,9606.ENSP00000261772,9606.ENSP00000270625,9606.ENSP00000277865,9606.ENSP00000278572,9606.ENSP00000283415,9606.ENSP00000297258,9606.ENSP00000298556,9606.ENSP00000299198,9606.ENSP00000307940,9606.ENSP00000309092,9606.ENSP00000311430,9606.ENSP00000313490,9606.ENSP00000331901,9606.ENSP00000339063,9606.ENSP00000341885,9606.ENSP00000345656,…	GOT2,EIF3K,EIF2S3,AARS1,RPS11,GLUD1,RPS3,LPCAT1,FABP5,HPRT1,CKB,EEF2,GMPPB,RPL4,PFAS,EEF1G,EEF1A1,RPS2,VAPA,RPL27A,RPL22,ALDH9A1,WARS1,RPL12,APOA2,RPL5,RPS4X,RRBP1,HNRNPUL1,EEF1B2,NME2,QPRT,RPL14,HAGH,PAICS,ALAD,RPSA,EEF1D,EIF4G1,ACSL1,OSTC,RACK1,RPL30,RPS5,PHGDH,SPTA1,ALDOA
GO:0043085	Positive regulation of catalytic activity	42	1191	3.52645	0.28	0.0027	9606.ENSP00000205948,9606.ENSP00000215832,9606.ENSP00000216802,9606.ENSP00000223136,9606.ENSP00000231751,9606.ENSP00000236671,9606.ENSP00000247970,9606.ENSP00000268058,9606.ENSP00000268182,9606.ENSP00000270142,9606.ENSP00000278572,9606.ENSP00000308541,9606.ENSP00000312999,9606.ENSP00000313199,9606.ENSP00000325527,9606.ENSP00000335153,9606.ENSP00000337598,9606.ENSP00000339191,9606.ENSP00000339720,…	APOH,MAPK1,PSME2,FIS1,LTF,CTSD,PIN1,PML,IQGAP1,SOD1,RPS3,F2,GNAI2,HNRNPD,FBN1,HSP90AA1,LIMS1,CAV1,NDUFA4,HSPD1,PARK7,RPS2,HMGB1,CRKL,HLA-DRB1,AFDN,APOA2,HSP90AB1,CAP1,TXN,HSPA1A,XRCC5,CCT4,PSAP,ITGB1,CD44,RHOA,PPP2CA,PPIA,ACSL1,RACK1,PTGES3
GO:0060429	Epithelium development	37	1069	3.46118	0.28	0.0089	9606.ENSP00000215832,9606.ENSP00000225655,9606.ENSP00000228740,9606.ENSP00000241052,9606.ENSP00000245907,9606.ENSP00000252999,9606.ENSP00000268058,9606.ENSP00000268182,9606.ENSP00000270142,9606.ENSP00000285930,9606.ENSP00000304592,9606.ENSP00000323856,9606.ENSP00000338934,9606.ENSP00000339191,9606.ENSP00000340510,9606.ENSP00000340989,9606.ENSP00000345672,9606.ENSP00000354357,9606.ENSP00000355771,…	MAPK1,PFN1,LTA4H,CAT,C3,LAMA5,PML,IQGAP1,SOD1,AKR1B1,FASN,PLEC,EZR,CAV1,PPL,SFN,CTSB,GSTM3,AFDN,FLNA,CNN3,TACSTD2,PGK1,CLIC4,ANXA1,AKR1C1,GRB2,TAGLN,FOLR1,PSAP,ITGB1,CD44,RHOA,FLNB,WDR1,ACTG1,PHGDH
GO:0006950	Response to stress	115	3358	3.42466	0.27	1.4e-08	9606.ENSP00000205948,9606.ENSP00000215832,9606.ENSP00000216181,9606.ENSP00000216714,9606.ENSP00000219150,9606.ENSP00000221419,9606.ENSP00000221566,9606.ENSP00000225275,9606.ENSP00000225371,9606.ENSP00000225698,9606.ENSP00000231751,9606.ENSP00000241052,9606.ENSP00000245907,9606.ENSP00000247970,9606.ENSP00000252699,9606.ENSP00000253496,9606.ENSP00000259396,9606.ENSP00000262418,9606.ENSP00000263408,…	APOH,MAPK1,MYH9,APEX1,CORO1A,HNRNPL,SGTA,MPO,EPX,C1QBP,LTF,CAT,C3,PIN1,ACTN4,F12,ORM1,SLC4A1,C9,KLKB1,ANXA3,AMBP,HPX,PXN,PML,SOD1,AHSG,RPS3,FERMT3,ACAA2,AKR1B1,PGLYRP2,ALB,PPBP,METAP1,AQP3,FOLR2,PRDX3,PDIA3,DDB1,FASN,FGB,F2,RBM14,TLN1,RAP2B,CALR,SERPINF2,PLEC,A2M,ZYX,DEFA3,HSP90AA1,FGG,CAV1,HSPD1,PARK7,PPL,SFN,PRDX6,HMGB1,CRKL,ANXA6,HP,HLA-DRB1,DPP4,GSTM3,COMT,CFH,APOA2,LMNA,BAG3,FLNA,PDLIM1,HSP9…
GO:0033036	Macromolecule localization	80	2356	3.39559	0.27	9.36e-06	9606.ENSP00000205948,9606.ENSP00000216181,9606.ENSP00000221566,9606.ENSP00000223136,9606.ENSP00000245206,9606.ENSP00000252699,9606.ENSP00000252999,9606.ENSP00000254810,9606.ENSP00000261263,9606.ENSP00000261574,9606.ENSP00000262418,9606.ENSP00000265709,9606.ENSP00000268058,9606.ENSP00000297258,9606.ENSP00000299138,9606.ENSP00000303366,9606.ENSP00000305230,9606.ENSP00000306330,9606.ENSP00000309415,…	APOH,MYH9,SGTA,FIS1,GOT2,ACTN4,LAMA5,H3-3B,RAB21,IPO5,SLC4A1,ANK1,PML,FABP5,VPS35,LMAN2,SRP9,YWHAG,CLTB,CALR,PLEC,COPG1,FBN1,COPB2,TMED9,LAMP1,HSP90AA1,FGG,LIMS1,SEC23B,EZR,CAV1,HSPD1,PARK7,SFN,VAPA,SPTBN1,AFDN,APOA2,COPA,PEX19,LMNA,LAMTOR2,BAG3,FLNA,TXN,ANXA1,RRBP1,IPO7,GDI2,AKR1C1,YWHAQ,SEC13,DNM2,XRCC5,AP1G1,CCT4,PSAP,SEC31A,KTN1,MVP,XPO1,SEPTIN9,GDI1,TMED7,PDCD6IP,DDX39B,ACSL1,SEPTIN11,HSPA8,…
GO:0071702	Organic substance transport	67	1957	3.42361	0.27	6.52e-05	9606.ENSP00000205948,9606.ENSP00000216181,9606.ENSP00000221566,9606.ENSP00000223136,9606.ENSP00000245206,9606.ENSP00000252699,9606.ENSP00000261263,9606.ENSP00000261574,9606.ENSP00000262418,9606.ENSP00000265983,9606.ENSP00000268058,9606.ENSP00000296028,9606.ENSP00000297258,9606.ENSP00000297991,9606.ENSP00000298223,9606.ENSP00000299138,9606.ENSP00000303366,9606.ENSP00000305230,9606.ENSP00000306330,…	APOH,MYH9,SGTA,FIS1,GOT2,ACTN4,RAB21,IPO5,SLC4A1,HPX,PML,PPBP,FABP5,AQP3,FOLR2,VPS35,LMAN2,SRP9,YWHAG,CLTB,CALR,COPG1,COPB2,TMED9,HSP90AA1,FGG,SEC23B,EZR,CAV1,HSPD1,PARK7,VAPA,SPTBN1,CYB5R1,APOA2,COPA,PEX19,LMNA,BAG3,ANXA1,RRBP1,IPO7,GDI2,AKR1C1,YWHAQ,SEC13,DNM2,AP1G1,FOLR1,PSAP,SEC31A,KTN1,MVP,XPO1,GDI1,TMED7,PDCD6IP,DDX39B,ACSL1,HSPA8,NPC2,COPE,CLTC,SNX12,AP2B1,HBB,MYO1C
GO:0048585	Negative regulation of response to stimulus	55	1612	3.41191	0.27	0.00054	9606.ENSP00000205948,9606.ENSP00000221566,9606.ENSP00000225698,9606.ENSP00000231751,9606.ENSP00000247970,9606.ENSP00000253496,9606.ENSP00000254722,9606.ENSP00000261313,9606.ENSP00000264690,9606.ENSP00000265132,9606.ENSP00000270142,9606.ENSP00000273784,9606.ENSP00000278572,9606.ENSP00000282541,9606.ENSP00000285093,9606.ENSP00000292609,9606.ENSP00000299138,9606.ENSP00000306099,9606.ENSP00000308541,…	APOH,SGTA,C1QBP,LTF,PIN1,F12,SERPINF1,PEBP1,KLKB1,AMBP,SOD1,AHSG,RPS3,GPD1L,ACAA2,PGLYRP2,VPS35,FGB,F2,GNAI2,CALR,SERPINF2,A2M,FBN1,FGG,EZR,CAV1,PARK7,ANXA2,HLA-DRB1,DPP4,LMNA,VDAC2,TXN,HSPA1A,ANXA1,EMILIN1,SEC13,DNM2,MVP,ITGB1,DDT,CD44,RHOA,DDX39B,PPP2CA,PPIA,RACK1,BANF1,TPT1,EPPK1,SAMHD1,ENO1,FGA,CD59
GO:0051641	Cellular localization	90	2677	3.36197	0.26	2.19e-06	9606.ENSP00000216181,9606.ENSP00000219150,9606.ENSP00000221566,9606.ENSP00000223136,9606.ENSP00000252699,9606.ENSP00000252999,9606.ENSP00000254810,9606.ENSP00000261263,9606.ENSP00000261574,9606.ENSP00000262418,9606.ENSP00000264908,9606.ENSP00000265709,9606.ENSP00000268058,9606.ENSP00000269886,9606.ENSP00000270142,9606.ENSP00000271064,9606.ENSP00000285093,9606.ENSP00000295897,9606.ENSP00000297991,…	MYH9,CORO1A,SGTA,FIS1,ACTN4,LAMA5,H3-3B,RAB21,IPO5,SLC4A1,ANXA3,ANK1,PML,SH3GL1,SOD1,TINAGL1,ACAA2,ALB,AQP3,VPS35,LMAN2,SRP9,YWHAG,CLTB,CALR,PLEC,COPG1,FBN1,COPB2,TMED9,LAMP1,HSP90AA1,FGG,LIMS1,SEC23B,EZR,CAV1,HSPD1,PARK7,SFN,VAPA,DYNC1H1,SPTBN1,MAP4,AFDN,COPA,PEX19,LMNA,LAMTOR2,BAG3,FLNA,VDAC2,PEF1,TXN,HSPA1A,ANXA1,RRBP1,IPO7,GDI2,YWHAQ,SEC13,DNM2,XRCC5,AP1G1,PSAP,SEC31A,KTN1,MVP,ITGB1,XPO1,SEPT…
GO:0050790	Regulation of catalytic activity	79	2370	3.33333	0.26	1.93e-05	9606.ENSP00000205948,9606.ENSP00000215832,9606.ENSP00000216802,9606.ENSP00000223136,9606.ENSP00000231751,9606.ENSP00000236671,9606.ENSP00000245907,9606.ENSP00000247970,9606.ENSP00000254722,9606.ENSP00000261313,9606.ENSP00000261574,9606.ENSP00000262418,9606.ENSP00000264908,9606.ENSP00000265132,9606.ENSP00000268058,9606.ENSP00000268182,9606.ENSP00000270142,9606.ENSP00000273784,9606.ENSP00000278572,…	APOH,MAPK1,PSME2,FIS1,LTF,CTSD,C3,PIN1,SERPINF1,PEBP1,IPO5,SLC4A1,ANXA3,AMBP,PML,IQGAP1,SOD1,AHSG,RPS3,COL6A3,PRDX3,YWHAG,F2,GNAI2,HNRNPD,RAP2B,SERPINF2,PLEC,A2M,FBN1,HSP90AA1,LIMS1,SEC23B,EEF1A1,CAV1,NDUFA4,HSPD1,PARK7,SFN,RPS2,HMGB1,CTSB,ANXA2,CRKL,WARS1,HP,HLA-DRB1,AFDN,APOA2,LAMTOR2,RPL5,HSP90AB1,CAP1,TXN,HSPA1A,ANXA1,IPO7,GDI2,XRCC5,EEF1B2,CCT4,PSAP,MVP,ITGB1,GAPDH,GDI1,CD44,RHOA,GPI,EEF1D,P…
GO:0071310	Cellular response to organic substance	68	2019	3.368	0.26	8.47e-05	9606.ENSP00000215832,9606.ENSP00000216714,9606.ENSP00000219150,9606.ENSP00000241052,9606.ENSP00000252699,9606.ENSP00000254722,9606.ENSP00000258198,9606.ENSP00000261574,9606.ENSP00000263579,9606.ENSP00000265983,9606.ENSP00000267257,9606.ENSP00000268058,9606.ENSP00000268182,9606.ENSP00000270142,9606.ENSP00000278572,9606.ENSP00000296028,9606.ENSP00000298223,9606.ENSP00000300289,9606.ENSP00000304592,…	MAPK1,APEX1,CORO1A,CAT,ACTN4,SERPINF1,DYNC1LI2,IPO5,DCPS,HPX,PXN,PML,IQGAP1,SOD1,RPS3,PPBP,FOLR2,PDIA3,FASN,FGB,YWHAG,HNRNPD,PKM,CALR,ZYX,HADHB,FBN1,DEFA3,FGG,LIMS1,EZR,EEF1A1,CAV1,HSPD1,PARK7,HMGB1,CTSB,CRKL,COL4A2,COL6A1,LAMTOR2,BAG3,FLNA,HSP90AB1,HSPA1A,ANXA1,GNB1,AKR1C1,DNM2,XRCC5,GRB2,FOLR1,ERO1A,GAPDH,CD14,ALAD,CSTF2,CD44,RHOA,FLNB,ACSL1,RACK1,HSPA8,ACTG1,PRPF8,PTGES3,MYO1C,STING1
GO:1902531	Regulation of intracellular signal transduction	58	1726	3.36037	0.26	0.00048	9606.ENSP00000157600,9606.ENSP00000215832,9606.ENSP00000223136,9606.ENSP00000225698,9606.ENSP00000231751,9606.ENSP00000241052,9606.ENSP00000247970,9606.ENSP00000252699,9606.ENSP00000261313,9606.ENSP00000265132,9606.ENSP00000268058,9606.ENSP00000268182,9606.ENSP00000268717,9606.ENSP00000270142,9606.ENSP00000278572,9606.ENSP00000282541,9606.ENSP00000304229,9606.ENSP00000306099,9606.ENSP00000308541,…	LMCD1,MAPK1,FIS1,C1QBP,LTF,CAT,PIN1,ACTN4,PEBP1,AMBP,PML,IQGAP1,COPS3,SOD1,RPS3,GPD1L,HINT1,FGB,F2,GNAI2,CALR,SERPINF2,HSP90AA1,FGG,LIMS1,EZR,CAV1,PARK7,HMGB1,VAPA,CRKL,HLA-DRB1,LAMTOR2,FLNA,RPL5,HSP90AB1,VDAC2,TXN,HSPA1A,EMILIN1,SEC13,DNM2,GRB2,ITGB1,GAPDH,DDT,CD14,CD44,RHOA,EEF1D,DDX39B,PPP2CA,PPIA,RACK1,DNM1L,TPT1,ENO1,FGA
GO:0009967	Positive regulation of signal transduction	51	1525	3.34426	0.26	0.0017	9606.ENSP00000157600,9606.ENSP00000223136,9606.ENSP00000225698,9606.ENSP00000231751,9606.ENSP00000241052,9606.ENSP00000245907,9606.ENSP00000247970,9606.ENSP00000252699,9606.ENSP00000265983,9606.ENSP00000268058,9606.ENSP00000268182,9606.ENSP00000270142,9606.ENSP00000278572,9606.ENSP00000297258,9606.ENSP00000299138,9606.ENSP00000300289,9606.ENSP00000304229,9606.ENSP00000306099,9606.ENSP00000308541,…	LMCD1,FIS1,C1QBP,LTF,CAT,C3,PIN1,ACTN4,HPX,PML,IQGAP1,SOD1,RPS3,FABP5,VPS35,PDIA3,HINT1,FGB,F2,GNAI2,CALR,SERPINF2,HSP90AA1,FGG,LIMS1,CAV1,PARK7,MAOA,HMGB1,VAPA,CRKL,HLA-DRB1,LAMTOR2,FLNA,HSP90AB1,TXN,HSPA1A,SEC13,ITGB1,GAPDH,DDT,CD14,CD44,RHOA,EEF1D,PPIA,RACK1,DNM1L,MYO1C,FGA,STING1
GO:0008219	Cell death	37	1118	3.30948	0.26	0.0179	9606.ENSP00000215832,9606.ENSP00000219150,9606.ENSP00000222219,9606.ENSP00000223136,9606.ENSP00000225698,9606.ENSP00000261772,9606.ENSP00000268058,9606.ENSP00000270142,9606.ENSP00000278572,9606.ENSP00000285093,9606.ENSP00000298510,9606.ENSP00000299138,9606.ENSP00000300289,9606.ENSP00000301764,9606.ENSP00000303920,9606.ENSP00000304229,9606.ENSP00000320171,9606.ENSP00000333298,9606.ENSP00000335153,…	MAPK1,CORO1A,DNASE2,FIS1,C1QBP,AARS1,PML,SOD1,RPS3,ACAA2,PRDX3,VPS35,PDIA3,DDB1,MZB1,HINT1,PKM,LAMP1,HSP90AA1,CAV1,HSPD1,SFN,VAPA,CRKL,ANXA6,NCKAP1,BAG3,VDAC2,ERO1A,GAPDH,CD14,RHOA,PDCD6IP,PPP2CA,PPIA,RACK1,DNM1L
GO:0012501	Programmed cell death	36	1084	3.32103	0.26	0.0198	9606.ENSP00000215832,9606.ENSP00000219150,9606.ENSP00000222219,9606.ENSP00000223136,9606.ENSP00000225698,9606.ENSP00000261772,9606.ENSP00000268058,9606.ENSP00000270142,9606.ENSP00000278572,9606.ENSP00000285093,9606.ENSP00000298510,9606.ENSP00000299138,9606.ENSP00000300289,9606.ENSP00000301764,9606.ENSP00000303920,9606.ENSP00000304229,9606.ENSP00000320171,9606.ENSP00000333298,9606.ENSP00000335153,…	MAPK1,CORO1A,DNASE2,FIS1,C1QBP,AARS1,PML,SOD1,RPS3,ACAA2,PRDX3,VPS35,PDIA3,DDB1,MZB1,HINT1,PKM,LAMP1,HSP90AA1,CAV1,HSPD1,SFN,CRKL,ANXA6,NCKAP1,BAG3,VDAC2,ERO1A,GAPDH,CD14,RHOA,PDCD6IP,PPP2CA,PPIA,RACK1,DNM1L
GO:0016477	Cell migration	30	903	3.32226	0.26	0.0468	9606.ENSP00000216181,9606.ENSP00000219150,9606.ENSP00000225371,9606.ENSP00000252999,9606.ENSP00000267257,9606.ENSP00000268058,9606.ENSP00000268182,9606.ENSP00000296028,9606.ENSP00000323856,9606.ENSP00000335153,9606.ENSP00000345347,9606.ENSP00000346300,9606.ENSP00000346550,9606.ENSP00000353731,9606.ENSP00000354251,9606.ENSP00000357288,9606.ENSP00000358866,9606.ENSP00000360305,9606.ENSP00000361883,…	MYH9,CORO1A,EPX,LAMA5,PXN,PML,IQGAP1,PPBP,PLEC,HSP90AA1,HMGB1,CRKL,ANXA6,DPP4,NCKAP1,LAMTOR2,FLNA,PDLIM1,CAP1,ANXA1,EMILIN1,FOLR1,ITGB1,LCP1,OGDH,CD44,RHOA,PPIA,WDR1,CNN2
GO:0034641	Cellular nitrogen compound metabolic process	112	3463	3.23419	0.25	2.7e-07	9606.ENSP00000215832,9606.ENSP00000216714,9606.ENSP00000221419,9606.ENSP00000222219,9606.ENSP00000225698,9606.ENSP00000228740,9606.ENSP00000248342,9606.ENSP00000253039,9606.ENSP00000253363,9606.ENSP00000258317,9606.ENSP00000261772,9606.ENSP00000263368,9606.ENSP00000263579,9606.ENSP00000265132,9606.ENSP00000269848,9606.ENSP00000270142,9606.ENSP00000270625,9606.ENSP00000278572,9606.ENSP00000292609,…	MAPK1,APEX1,HNRNPL,DNASE2,C1QBP,LTA4H,EIF3K,EIF2S3,RBM39,NPL,AARS1,BLVRB,DCPS,AMBP,PFKL,SOD1,RPS11,RPS3,PGLYRP2,HPRT1,DDB1,PA2G4,HINT1,EEF2,GMPPB,RPL4,RBM14,HNRNPD,PFAS,PKM,EEF1G,HSP90AA1,SF3B1,EEF1A1,CAV1,HSPD1,PARK7,MAOA,RPS2,SNRPD2,HMGB1,VAPA,RPL27A,ANXA2,RPL22,SND1,ALDH9A1,WARS1,COL4A2,DPP4,GSTM3,COMT,RPL12,CLIC2,MPP1,RPL5,PGAM1,PGM1,HSP90AB1,PGK1,GLO1,RPS4X,HSPA1A,CLIC1,RRBP1,ACOT9,HNRNPUL1,…
GO:0022607	Cellular component assembly	81	2467	3.28334	0.25	2.25e-05	9606.ENSP00000210313,9606.ENSP00000219150,9606.ENSP00000225698,9606.ENSP00000236671,9606.ENSP00000248342,9606.ENSP00000252999,9606.ENSP00000253039,9606.ENSP00000254810,9606.ENSP00000263408,9606.ENSP00000264758,9606.ENSP00000267257,9606.ENSP00000268058,9606.ENSP00000278572,9606.ENSP00000279227,9606.ENSP00000295688,9606.ENSP00000298556,9606.ENSP00000299138,9606.ENSP00000300289,9606.ENSP00000303920,…	PSMD5,CORO1A,C1QBP,CTSD,EIF3K,LAMA5,EIF2S3,H3-3B,C9,ADD1,PXN,PML,RPS3,FERMT3,CCT3,HPRT1,VPS35,PDIA3,MZB1,FGB,RBM14,TLN1,CALR,PLEC,ZYX,HSP90AA1,SF3B1,FGG,EZR,CAV1,HSPD1,SNRPD2,HMGB1,ANXA2,CRKL,ALDH9A1,PLS3,DYNC1H1,SPTBN1,HLA-DRB1,NCKAP1,CAPZA2,AFDN,APOA2,LMNA,BAG3,FLNA,RPL5,PDLIM1,HSP90AB1,PEF1,HSPA1A,EMILIN1,XRCC5,AP1G1,ACTN1,ITGB1,MYH11,LCP1,ALAD,RPSA,SNRPG,RHOA,PDCD6IP,DDX39B,WDR1,BANF1,JCHAIN,…
GO:0019220	Regulation of phosphate metabolic process	46	1405	3.27402	0.25	0.0057	9606.ENSP00000215832,9606.ENSP00000223136,9606.ENSP00000231751,9606.ENSP00000245907,9606.ENSP00000247970,9606.ENSP00000261574,9606.ENSP00000262418,9606.ENSP00000265983,9606.ENSP00000268182,9606.ENSP00000270142,9606.ENSP00000278572,9606.ENSP00000282541,9606.ENSP00000283415,9606.ENSP00000298510,9606.ENSP00000306330,9606.ENSP00000308541,9606.ENSP00000312999,9606.ENSP00000319096,9606.ENSP00000323856,…	MAPK1,FIS1,LTF,C3,PIN1,IPO5,SLC4A1,HPX,IQGAP1,SOD1,RPS3,GPD1L,LPCAT1,PRDX3,YWHAG,F2,GNAI2,RAP2B,PLEC,FBN1,HSP90AA1,EEF1A1,CAV1,PARK7,SFN,CRKL,WARS1,HLA-DRB1,PGAM1,HSP90AB1,TXN,IPO7,EMILIN1,XRCC5,MVP,TF,CD44,RHOA,EIF4G1,PPP2CA,PPIA,ACSL1,RACK1,DNM1L,PTGES3,ENO1
GO:0006955	Immune response	43	1321	3.25511	0.25	0.0099	9606.ENSP00000219150,9606.ENSP00000225698,9606.ENSP00000231751,9606.ENSP00000245907,9606.ENSP00000253496,9606.ENSP00000263408,9606.ENSP00000264908,9606.ENSP00000265983,9606.ENSP00000268058,9606.ENSP00000292609,9606.ENSP00000296028,9606.ENSP00000298556,9606.ENSP00000306099,9606.ENSP00000308541,9606.ENSP00000311747,9606.ENSP00000323856,9606.ENSP00000323929,9606.ENSP00000324422,9606.ENSP00000328359,…	CORO1A,C1QBP,LTF,C3,F12,C9,ANXA3,HPX,PML,PGLYRP2,PPBP,HPRT1,FGB,F2,RBM14,PLEC,A2M,ZYX,DEFA3,HSPD1,HMGB1,HLA-DRB1,CFH,CNPY3,HLA-C,ANXA1,IPO7,XRCC5,GAPDH,LCP1,CD14,TF,GPI,CFB,FLNB,RPL30,JCHAIN,C1R,ACTG1,SAMHD1,MYO1C,FGA,STING1
GO:0042325	Regulation of phosphorylation	41	1251	3.27738	0.25	0.0119	9606.ENSP00000215832,9606.ENSP00000231751,9606.ENSP00000245907,9606.ENSP00000247970,9606.ENSP00000261574,9606.ENSP00000262418,9606.ENSP00000265983,9606.ENSP00000268182,9606.ENSP00000270142,9606.ENSP00000278572,9606.ENSP00000282541,9606.ENSP00000298510,9606.ENSP00000306330,9606.ENSP00000308541,9606.ENSP00000319096,9606.ENSP00000323856,9606.ENSP00000325527,9606.ENSP00000335153,9606.ENSP00000339063,…	MAPK1,LTF,C3,PIN1,IPO5,SLC4A1,HPX,IQGAP1,SOD1,RPS3,GPD1L,PRDX3,YWHAG,F2,RAP2B,PLEC,FBN1,HSP90AA1,EEF1A1,CAV1,PARK7,SFN,CRKL,WARS1,HLA-DRB1,PGAM1,HSP90AB1,TXN,IPO7,EMILIN1,XRCC5,MVP,TF,CD44,RHOA,EIF4G1,PPP2CA,PPIA,ACSL1,RACK1,PTGES3
GO:0006915	Apoptotic process	34	1041	3.26609	0.25	0.0333	9606.ENSP00000215832,9606.ENSP00000219150,9606.ENSP00000222219,9606.ENSP00000223136,9606.ENSP00000225698,9606.ENSP00000261772,9606.ENSP00000268058,9606.ENSP00000270142,9606.ENSP00000278572,9606.ENSP00000285093,9606.ENSP00000298510,9606.ENSP00000299138,9606.ENSP00000300289,9606.ENSP00000301764,9606.ENSP00000303920,9606.ENSP00000304229,9606.ENSP00000335153,9606.ENSP00000339191,9606.ENSP00000340019,…	MAPK1,CORO1A,DNASE2,FIS1,C1QBP,AARS1,PML,SOD1,RPS3,ACAA2,PRDX3,VPS35,PDIA3,DDB1,MZB1,HINT1,HSP90AA1,CAV1,HSPD1,SFN,CRKL,ANXA6,NCKAP1,BAG3,VDAC2,ERO1A,GAPDH,CD14,RHOA,PDCD6IP,PPP2CA,PPIA,RACK1,DNM1L
GO:0042221	Response to chemical	128	4010	3.19202	0.24	3.29e-08	9606.ENSP00000215832,9606.ENSP00000216714,9606.ENSP00000219150,9606.ENSP00000221419,9606.ENSP00000221566,9606.ENSP00000225275,9606.ENSP00000225371,9606.ENSP00000228740,9606.ENSP00000241052,9606.ENSP00000245206,9606.ENSP00000252699,9606.ENSP00000252999,9606.ENSP00000253496,9606.ENSP00000254722,9606.ENSP00000258198,9606.ENSP00000261574,9606.ENSP00000263579,9606.ENSP00000264758,9606.ENSP00000264908,…	MAPK1,APEX1,CORO1A,HNRNPL,SGTA,MPO,EPX,LTA4H,CAT,GOT2,ACTN4,LAMA5,F12,SERPINF1,DYNC1LI2,IPO5,DCPS,ADD1,ANXA3,AMBP,HPX,PXN,PML,IQGAP1,PFKL,SOD1,RPS3,ACAA2,AKR1B1,ALB,PPBP,AQP3,FOLR2,PRDX3,HPRT1,PDIA3,FASN,FGB,YWHAG,RBM14,GNAI2,HNRNPD,PFAS,CYC1,PKM,CALR,PLEC,A2M,ZYX,HADHB,FBN1,DEFA3,HSP90AA1,FGG,LIMS1,EZR,EEF1A1,CAV1,HSPD1,PARK7,PRDX6,HMGB1,CTSB,CRKL,HP,COL4A2,DPP4,GSTM3,COL6A1,MGST3,APOA2,LMNA,LAM…
GO:0006810	Transport	120	3785	3.17041	0.24	1.78e-07	9606.ENSP00000205948,9606.ENSP00000215832,9606.ENSP00000216181,9606.ENSP00000219150,9606.ENSP00000221566,9606.ENSP00000223136,9606.ENSP00000228318,9606.ENSP00000231751,9606.ENSP00000245206,9606.ENSP00000252699,9606.ENSP00000258091,9606.ENSP00000261263,9606.ENSP00000261574,9606.ENSP00000262418,9606.ENSP00000263401,9606.ENSP00000264613,9606.ENSP00000264908,9606.ENSP00000265709,9606.ENSP00000265983,…	APOH,MAPK1,MYH9,CORO1A,SGTA,FIS1,SLC25A3,LTF,GOT2,ACTN4,CCT7,RAB21,IPO5,SLC4A1,COMMD9,CP,ANXA3,ANK1,HPX,PML,SH3GL1,SOD1,TINAGL1,AHSG,CCT5,ACAA2,CCT3,PPBP,FABP5,AQP3,FOLR2,VPS35,LMAN2,SRP9,YWHAG,CLTB,CYC1,CALR,COPG1,COPB2,TMED9,LAMP1,HSP90AA1,FGG,SEC23B,EZR,CAV1,NDUFA4,HSPD1,PARK7,HMGB1,VAPA,ANXA2,ANXA6,DYNC1H1,SPTBN1,DPP4,CYB5R1,APOA2,COPA,PEX19,LMNA,S100A6,BAG3,CLIC2,FLNA,VDAC2,CAP1,PEF1,ATP6V1G…
GO:0048584	Positive regulation of response to stimulus	68	2131	3.19099	0.24	0.00039	9606.ENSP00000157600,9606.ENSP00000205948,9606.ENSP00000215832,9606.ENSP00000221566,9606.ENSP00000223136,9606.ENSP00000225698,9606.ENSP00000231751,9606.ENSP00000241052,9606.ENSP00000245907,9606.ENSP00000247970,9606.ENSP00000252699,9606.ENSP00000253496,9606.ENSP00000263408,9606.ENSP00000265983,9606.ENSP00000268058,9606.ENSP00000268182,9606.ENSP00000270142,9606.ENSP00000278572,9606.ENSP00000297258,…	LMCD1,APOH,MAPK1,SGTA,FIS1,C1QBP,LTF,CAT,C3,PIN1,ACTN4,F12,C9,HPX,PML,IQGAP1,SOD1,RPS3,FABP5,VPS35,PDIA3,HINT1,FGB,F2,RBM14,GNAI2,CALR,SERPINF2,FBN1,LAMP1,HSP90AA1,FGG,LIMS1,CAV1,HSPD1,PARK7,MAOA,HMGB1,VAPA,CRKL,HLA-DRB1,CFH,LAMTOR2,FLNA,HSP90AB1,TXN,HSPA1A,ANXA1,EMILIN1,SEC13,XRCC5,AP1G1,ITGB1,GAPDH,DDT,CD14,CD44,RHOA,EEF1D,CFB,PPIA,RACK1,C1R,DNM1L,ACTG1,MYO1C,FGA,STING1
GO:0023056	Positive regulation of signaling	54	1698	3.18021	0.24	0.0033	9606.ENSP00000157600,9606.ENSP00000215832,9606.ENSP00000223136,9606.ENSP00000225698,9606.ENSP00000231751,9606.ENSP00000241052,9606.ENSP00000245907,9606.ENSP00000247970,9606.ENSP00000252699,9606.ENSP00000265983,9606.ENSP00000268058,9606.ENSP00000268182,9606.ENSP00000270142,9606.ENSP00000277865,9606.ENSP00000278572,9606.ENSP00000297258,9606.ENSP00000299138,9606.ENSP00000300289,9606.ENSP00000304229,…	LMCD1,MAPK1,FIS1,C1QBP,LTF,CAT,C3,PIN1,ACTN4,HPX,PML,IQGAP1,SOD1,GLUD1,RPS3,FABP5,VPS35,PDIA3,HINT1,FGB,F2,GNAI2,CALR,SERPINF2,HSP90AA1,FGG,LIMS1,CAV1,PARK7,MAOA,HMGB1,VAPA,ANXA2,CRKL,HLA-DRB1,LAMTOR2,FLNA,HSP90AB1,TXN,HSPA1A,SEC13,ITGB1,GAPDH,DDT,CD14,CD44,RHOA,EEF1D,PPIA,RACK1,DNM1L,MYO1C,FGA,STING1
GO:0051240	Positive regulation of multicellular organismal process	48	1505	3.18937	0.24	0.007	9606.ENSP00000205948,9606.ENSP00000225371,9606.ENSP00000225698,9606.ENSP00000231751,9606.ENSP00000245907,9606.ENSP00000253496,9606.ENSP00000254722,9606.ENSP00000259396,9606.ENSP00000261263,9606.ENSP00000264908,9606.ENSP00000270142,9606.ENSP00000278572,9606.ENSP00000297258,9606.ENSP00000299138,9606.ENSP00000306099,9606.ENSP00000308541,9606.ENSP00000312999,9606.ENSP00000320171,9606.ENSP00000321853,…	APOH,EPX,C1QBP,LTF,C3,F12,SERPINF1,ORM1,RAB21,ANXA3,SOD1,RPS3,FABP5,VPS35,FGB,F2,GNAI2,PKM,SERPINF2,HSP90AA1,FGG,EZR,CAV1,HSPD1,PARK7,HMGB1,ANXA2,DYNC1H1,SPTBN1,HLA-DRB1,APOA2,HSPA1A,ANXA1,EMILIN1,XRCC5,MTPN,NME2,ITGB1,GAPDH,DDT,CD14,GDI1,RHOA,ACSL1,RACK1,ENO1,FGA,STING1
GO:0001932	Regulation of protein phosphorylation	35	1108	3.15884	0.24	0.0454	9606.ENSP00000215832,9606.ENSP00000231751,9606.ENSP00000245907,9606.ENSP00000247970,9606.ENSP00000261574,9606.ENSP00000265983,9606.ENSP00000268182,9606.ENSP00000270142,9606.ENSP00000278572,9606.ENSP00000282541,9606.ENSP00000306330,9606.ENSP00000308541,9606.ENSP00000319096,9606.ENSP00000323856,9606.ENSP00000325527,9606.ENSP00000335153,9606.ENSP00000339191,9606.ENSP00000340278,9606.ENSP00000340989,…	MAPK1,LTF,C3,PIN1,IPO5,HPX,IQGAP1,SOD1,RPS3,GPD1L,YWHAG,F2,RAP2B,PLEC,FBN1,HSP90AA1,CAV1,PARK7,SFN,CRKL,WARS1,HLA-DRB1,HSP90AB1,TXN,IPO7,EMILIN1,XRCC5,MVP,CD44,RHOA,EIF4G1,PPP2CA,PPIA,ACSL1,RACK1
GO:0051234	Establishment of localization	123	3946	3.11708	0.23	2.54e-07	9606.ENSP00000205948,9606.ENSP00000215832,9606.ENSP00000216181,9606.ENSP00000219150,9606.ENSP00000221566,9606.ENSP00000223136,9606.ENSP00000228318,9606.ENSP00000231751,9606.ENSP00000245206,9606.ENSP00000252699,9606.ENSP00000258091,9606.ENSP00000261263,9606.ENSP00000261574,9606.ENSP00000262418,9606.ENSP00000263401,9606.ENSP00000264613,9606.ENSP00000264908,9606.ENSP00000265709,9606.ENSP00000265983,…	APOH,MAPK1,MYH9,CORO1A,SGTA,FIS1,SLC25A3,LTF,GOT2,ACTN4,CCT7,RAB21,IPO5,SLC4A1,COMMD9,CP,ANXA3,ANK1,HPX,PML,SH3GL1,SOD1,TINAGL1,AHSG,CCT5,ACAA2,CCT3,PPBP,FABP5,AQP3,FOLR2,VPS35,LMAN2,SRP9,YWHAG,CLTB,CYC1,CALR,COPG1,COPB2,TMED9,LAMP1,HSP90AA1,FGG,LIMS1,SEC23B,EZR,CAV1,NDUFA4,HSPD1,PARK7,HMGB1,VAPA,ANXA2,ANXA6,DYNC1H1,SPTBN1,MAP4,DPP4,AFDN,CYB5R1,APOA2,COPA,PEX19,LMNA,S100A6,BAG3,CLIC2,FLNA,VDAC2,C…
GO:0065009	Regulation of molecular function	96	3085	3.11183	0.23	1.54e-05	9606.ENSP00000205948,9606.ENSP00000215832,9606.ENSP00000216802,9606.ENSP00000221419,9606.ENSP00000223136,9606.ENSP00000225655,9606.ENSP00000231751,9606.ENSP00000236671,9606.ENSP00000241052,9606.ENSP00000245907,9606.ENSP00000247970,9606.ENSP00000252699,9606.ENSP00000254722,9606.ENSP00000261313,9606.ENSP00000261574,9606.ENSP00000262418,9606.ENSP00000264758,9606.ENSP00000264908,9606.ENSP00000265132,…	APOH,MAPK1,PSME2,HNRNPL,FIS1,PFN1,LTF,CTSD,CAT,C3,PIN1,ACTN4,SERPINF1,PEBP1,IPO5,SLC4A1,ADD1,ANXA3,AMBP,PML,IQGAP1,SOD1,AHSG,RPS3,GPD1L,STOM,COL6A3,PRDX3,YWHAG,F2,GNAI2,HNRNPD,RAP2B,SERPINF2,PLEC,A2M,FBN1,HSP90AA1,LIMS1,SEC23B,EEF1A1,CAV1,NDUFA4,HSPD1,PARK7,SFN,RPS2,HMGB1,CTSB,ANXA2,CRKL,WARS1,HP,HLA-DRB1,AFDN,APOA2,PEX19,LAMTOR2,CLIC2,FLNA,RPL5,HSP90AB1,CAP1,TXN,HSPA1A,ANXA1,IPO7,GDI2,DNM2,XRCC5…
GO:0044085	Cellular component biogenesis	85	2702	3.14582	0.23	5.31e-05	9606.ENSP00000210313,9606.ENSP00000219150,9606.ENSP00000225698,9606.ENSP00000236671,9606.ENSP00000248342,9606.ENSP00000252999,9606.ENSP00000253039,9606.ENSP00000254810,9606.ENSP00000263408,9606.ENSP00000264758,9606.ENSP00000267257,9606.ENSP00000268058,9606.ENSP00000278572,9606.ENSP00000279227,9606.ENSP00000295688,9606.ENSP00000298556,9606.ENSP00000299138,9606.ENSP00000300289,9606.ENSP00000302886,…	PSMD5,CORO1A,C1QBP,CTSD,EIF3K,LAMA5,EIF2S3,H3-3B,C9,ADD1,PXN,PML,RPS3,FERMT3,CCT3,HPRT1,VPS35,PDIA3,PA2G4,MZB1,FGB,RBM14,TLN1,CALR,PLEC,ZYX,HSP90AA1,SF3B1,FGG,EZR,CAV1,HSPD1,SNRPD2,HMGB1,ANXA2,CRKL,ALDH9A1,PLS3,DYNC1H1,SPTBN1,HLA-DRB1,NCKAP1,CAPZA2,AFDN,APOA2,PEX19,LMNA,BAG3,FLNA,RPL5,PDLIM1,HSP90AB1,PEF1,HSPA1A,EMILIN1,XRCC5,AP1G1,ACTN1,ITGB1,RPL14,MYH11,LCP1,XPO1,ALAD,RPSA,SNRPG,RHOA,PDCD6IP,DD…
GO:0010467	Gene expression	65	2101	3.09376	0.23	0.0014	9606.ENSP00000205948,9606.ENSP00000221419,9606.ENSP00000225698,9606.ENSP00000248342,9606.ENSP00000253039,9606.ENSP00000253363,9606.ENSP00000253496,9606.ENSP00000261772,9606.ENSP00000263579,9606.ENSP00000264690,9606.ENSP00000270625,9606.ENSP00000278572,9606.ENSP00000296411,9606.ENSP00000302886,9606.ENSP00000306099,9606.ENSP00000307940,9606.ENSP00000308541,9606.ENSP00000311430,9606.ENSP00000311747,…	APOH,HNRNPL,C1QBP,EIF3K,EIF2S3,RBM39,F12,AARS1,DCPS,KLKB1,RPS11,RPS3,METAP1,PA2G4,FGB,EEF2,F2,RPL4,RBM14,HNRNPD,CALR,PLEC,HADHB,EEF1G,SF3B1,FGG,EEF1A1,HSPD1,RPS2,SNRPD2,RPL27A,ANXA2,RPL22,WARS1,HP,COL4A2,DPP4,RPL12,RPL5,PGK1,RPS4X,RRBP1,HNRNPUL1,EEF1B2,HNRNPA3,ERO1A,RPL14,CSTF2,RPSA,SNRPG,HNRNPF,EEF1D,EIF4G1,DDX39B,PPP2CA,RACK1,RPL30,HSPA8,C1R,SPON1,PRPF8,RPS5,CPSF1,SAMHD1,FGA
GO:0010647	Positive regulation of cell communication	53	1693	3.13054	0.23	0.0053	9606.ENSP00000157600,9606.ENSP00000215832,9606.ENSP00000223136,9606.ENSP00000225698,9606.ENSP00000231751,9606.ENSP00000241052,9606.ENSP00000245907,9606.ENSP00000247970,9606.ENSP00000252699,9606.ENSP00000265983,9606.ENSP00000268058,9606.ENSP00000268182,9606.ENSP00000270142,9606.ENSP00000277865,9606.ENSP00000278572,9606.ENSP00000297258,9606.ENSP00000299138,9606.ENSP00000300289,9606.ENSP00000304229,…	LMCD1,MAPK1,FIS1,C1QBP,LTF,CAT,C3,PIN1,ACTN4,HPX,PML,IQGAP1,SOD1,GLUD1,RPS3,FABP5,VPS35,PDIA3,HINT1,FGB,F2,GNAI2,CALR,SERPINF2,HSP90AA1,FGG,LIMS1,CAV1,PARK7,MAOA,HMGB1,VAPA,CRKL,HLA-DRB1,LAMTOR2,FLNA,HSP90AB1,TXN,HSPA1A,SEC13,ITGB1,GAPDH,DDT,CD14,CD44,RHOA,EEF1D,PPIA,RACK1,DNM1L,MYO1C,FGA,STING1
GO:0044271	Cellular nitrogen compound biosynthetic process	46	1494	3.07898	0.23	0.0175	9606.ENSP00000248342,9606.ENSP00000253039,9606.ENSP00000261772,9606.ENSP00000270625,9606.ENSP00000278572,9606.ENSP00000298556,9606.ENSP00000307940,9606.ENSP00000309092,9606.ENSP00000311430,9606.ENSP00000313199,9606.ENSP00000313490,9606.ENSP00000331901,9606.ENSP00000335153,9606.ENSP00000339063,9606.ENSP00000339191,9606.ENSP00000341885,9606.ENSP00000345656,9606.ENSP00000346015,9606.ENSP00000346032,…	EIF3K,EIF2S3,AARS1,RPS11,RPS3,HPRT1,EEF2,GMPPB,RPL4,HNRNPD,PFAS,EEF1G,HSP90AA1,EEF1A1,CAV1,RPS2,VAPA,RPL27A,ANXA2,RPL22,ALDH9A1,WARS1,COL4A2,RPL12,MPP1,RPL5,HSP90AB1,RPS4X,RRBP1,EEF1B2,NME2,QPRT,RPL14,HAGH,PAICS,ALAD,RPSA,EEF1D,EIF4G1,ACSL1,RACK1,RPL30,RPS5,PTGES3,SPTA1,ALDOA
GO:0051179	Localization	137	4512	3.03635	0.22	8.82e-08	9606.ENSP00000205948,9606.ENSP00000215832,9606.ENSP00000216181,9606.ENSP00000219150,9606.ENSP00000221566,9606.ENSP00000223136,9606.ENSP00000228318,9606.ENSP00000231751,9606.ENSP00000245206,9606.ENSP00000252699,9606.ENSP00000252999,9606.ENSP00000254810,9606.ENSP00000258091,9606.ENSP00000258198,9606.ENSP00000261263,9606.ENSP00000261574,9606.ENSP00000262418,9606.ENSP00000263401,9606.ENSP00000264613,…	APOH,MAPK1,MYH9,CORO1A,SGTA,FIS1,SLC25A3,LTF,GOT2,ACTN4,LAMA5,H3-3B,CCT7,DYNC1LI2,RAB21,IPO5,SLC4A1,COMMD9,CP,ANXA3,ANK1,HPX,PML,SH3GL1,SOD1,TINAGL1,AHSG,CCT5,ACAA2,CCT3,ALB,PPBP,FABP5,AQP3,FOLR2,VPS35,LMAN2,SRP9,YWHAG,CLTB,CYC1,CALR,PLEC,COPG1,FBN1,COPB2,TMED9,LAMP1,HSP90AA1,FGG,LIMS1,SEC23B,EZR,CAV1,NDUFA4,HSPD1,PARK7,SFN,HMGB1,VAPA,ANXA2,ANXA6,DYNC1H1,SPTBN1,MAP4,DPP4,AFDN,CYB5R1,APOA2,COPA,PE…
GO:0006996	Organelle organization	103	3470	2.9683	0.21	3.57e-05	9606.ENSP00000216181,9606.ENSP00000216714,9606.ENSP00000219150,9606.ENSP00000221566,9606.ENSP00000223136,9606.ENSP00000225655,9606.ENSP00000225698,9606.ENSP00000236671,9606.ENSP00000246069,9606.ENSP00000248437,9606.ENSP00000252456,9606.ENSP00000252699,9606.ENSP00000252999,9606.ENSP00000254810,9606.ENSP00000258198,9606.ENSP00000264758,9606.ENSP00000265709,9606.ENSP00000268058,9606.ENSP00000270142,…	MYH9,APEX1,CORO1A,SGTA,FIS1,PFN1,C1QBP,CTSD,DSTN,TUBA4A,CNN1,ACTN4,LAMA5,H3-3B,DYNC1LI2,ADD1,ANK1,PML,SOD1,CISD2,RPS3,ACAA2,PRDX3,VPS35,LMAN2,RBM14,PDLIM2,TLN1,CALR,PLEC,ZYX,TMED9,HSP90AA1,SF3B1,SEC23B,EZR,CAV1,HSPD1,PARK7,PPL,SFN,HMGB1,VAPA,ANXA2,PLS3,DYNC1H1,SPTBN1,HLA-DRB1,MAP4,NCKAP1,CAPZA2,PEX19,EPB41L2,LMNA,BAG3,FLNA,CNN3,RPL5,PDLIM1,HSP90AB1,VDAC2,CAP1,PEF1,HMGCL,HSPA1A,ANXA1,SEC13,XRCC5,G…
GO:0051239	Regulation of multicellular organismal process	81	2749	2.94653	0.21	0.0007	9606.ENSP00000157600,9606.ENSP00000205948,9606.ENSP00000215832,9606.ENSP00000225371,9606.ENSP00000225655,9606.ENSP00000225698,9606.ENSP00000231751,9606.ENSP00000245907,9606.ENSP00000252456,9606.ENSP00000252999,9606.ENSP00000253496,9606.ENSP00000254722,9606.ENSP00000259396,9606.ENSP00000261263,9606.ENSP00000264690,9606.ENSP00000264758,9606.ENSP00000264908,9606.ENSP00000268058,9606.ENSP00000268182,…	LMCD1,APOH,MAPK1,EPX,PFN1,C1QBP,LTF,C3,CNN1,LAMA5,F12,SERPINF1,ORM1,RAB21,KLKB1,ADD1,ANXA3,PML,IQGAP1,SOD1,AHSG,RPS3,GPD1L,PGLYRP2,FABP5,AQP3,VPS35,FGB,F2,GNAI2,PKM,CALR,SERPINF2,FBN1,HSP90AA1,FGG,EZR,CAV1,HSPD1,PARK7,SFN,HMGB1,ANXA2,ANXA6,WARS1,DYNC1H1,SPTBN1,HLA-DRB1,COL4A2,APOA2,LMNA,CLIC2,TACSTD2,HSP90AB1,PGK1,HSPG2,HSPA1A,ANXA1,EMILIN1,XRCC5,MTPN,NME2,G6PD,EFEMP1,ITGB1,GAPDH,DDT,CD14,TF,GDI1…
GO:0051172	Negative regulation of nitrogen compound metabolic process	72	2403	2.99625	0.21	0.0013	9606.ENSP00000157600,9606.ENSP00000216714,9606.ENSP00000221419,9606.ENSP00000221566,9606.ENSP00000223136,9606.ENSP00000225698,9606.ENSP00000231751,9606.ENSP00000245907,9606.ENSP00000247970,9606.ENSP00000254722,9606.ENSP00000261313,9606.ENSP00000261574,9606.ENSP00000262418,9606.ENSP00000263579,9606.ENSP00000265132,9606.ENSP00000268058,9606.ENSP00000273784,9606.ENSP00000278572,9606.ENSP00000282541,…	LMCD1,APEX1,HNRNPL,SGTA,FIS1,C1QBP,LTF,C3,PIN1,SERPINF1,PEBP1,IPO5,SLC4A1,DCPS,AMBP,PML,AHSG,RPS3,GPD1L,LPCAT1,COL6A3,PRDX3,VPS35,PA2G4,SRP9,YWHAG,F2,GNAI2,HNRNPD,CALR,SERPINF2,PLEC,A2M,LIMS1,EZR,CAV1,PARK7,SFN,HMGB1,CTSB,ANXA2,CRKL,WARS1,BAG3,FLNA,RPL5,HSP90AB1,TXN,HSPG2,HSPA1A,IPO7,EMILIN1,YWHAQ,XRCC5,G6PD,MVP,GAPDH,ALAD,CD44,GPI,EIF4G1,PPP2CA,PPIA,RACK1,HSPA8,SPON1,F8A3,CLTC,SNX12,SERPINB6,ENO…
GO:0009058	Biosynthetic process	74	2506	2.95291	0.21	0.0015	9606.ENSP00000225275,9606.ENSP00000228740,9606.ENSP00000245206,9606.ENSP00000248342,9606.ENSP00000253039,9606.ENSP00000261772,9606.ENSP00000270142,9606.ENSP00000270625,9606.ENSP00000277865,9606.ENSP00000278572,9606.ENSP00000283415,9606.ENSP00000285093,9606.ENSP00000285930,9606.ENSP00000297258,9606.ENSP00000298556,9606.ENSP00000299198,9606.ENSP00000304592,9606.ENSP00000307940,9606.ENSP00000309092,…	MPO,LTA4H,GOT2,EIF3K,EIF2S3,AARS1,SOD1,RPS11,GLUD1,RPS3,LPCAT1,ACAA2,AKR1B1,FABP5,HPRT1,CKB,FASN,EEF2,GMPPB,RPL4,HNRNPD,PFAS,MDH2,EEF1G,HSP90AA1,ISYNA1,EEF1A1,CAV1,PARK7,RPS2,VAPA,RPL27A,ANXA2,RPL22,ALDH9A1,WARS1,COL4A2,RPL12,CYB5R1,MGST3,APOA2,MPP1,RPL5,PGM1,HSP90AB1,PGK1,RPS4X,HMGCL,RRBP1,HNRNPUL1,EEF1B2,NME2,G6PD,QPRT,RPL14,HAGH,DDT,PAICS,ALAD,RPSA,GPI,EEF1D,MPST,EIF4G1,ACSL1,OSTC,RACK1,RPL30,…
GO:0009888	Tissue development	51	1723	2.95995	0.21	0.02	9606.ENSP00000215832,9606.ENSP00000225655,9606.ENSP00000228740,9606.ENSP00000241052,9606.ENSP00000245907,9606.ENSP00000252999,9606.ENSP00000268058,9606.ENSP00000268182,9606.ENSP00000270142,9606.ENSP00000285930,9606.ENSP00000297258,9606.ENSP00000304592,9606.ENSP00000320866,9606.ENSP00000323856,9606.ENSP00000327336,9606.ENSP00000338934,9606.ENSP00000339191,9606.ENSP00000340510,9606.ENSP00000340989,…	MAPK1,PFN1,LTA4H,CAT,C3,LAMA5,PML,IQGAP1,SOD1,AKR1B1,FABP5,FASN,CALR,PLEC,BGN,EZR,CAV1,PPL,SFN,CTSB,ANXA6,HLA-DRB1,COL4A2,GSTM3,COL6A1,AFDN,LMNA,FLNA,CNN3,TACSTD2,PGK1,PEF1,CLIC4,HSPG2,ANXA1,AKR1C1,GRB2,TAGLN,FOLR1,PSAP,ITGB1,MYH11,CD44,RHOA,GPI,PPP2CA,FLNB,WDR1,MYL6,ACTG1,PHGDH
GO:0031399	Regulation of protein modification process	46	1560	2.94872	0.21	0.0357	9606.ENSP00000215832,9606.ENSP00000231751,9606.ENSP00000245907,9606.ENSP00000247970,9606.ENSP00000261574,9606.ENSP00000265983,9606.ENSP00000268058,9606.ENSP00000268182,9606.ENSP00000268717,9606.ENSP00000270142,9606.ENSP00000278572,9606.ENSP00000282541,9606.ENSP00000306330,9606.ENSP00000308541,9606.ENSP00000312999,9606.ENSP00000319096,9606.ENSP00000323856,9606.ENSP00000325527,9606.ENSP00000335153,…	MAPK1,LTF,C3,PIN1,IPO5,HPX,PML,IQGAP1,COPS3,SOD1,RPS3,GPD1L,YWHAG,F2,GNAI2,RAP2B,PLEC,FBN1,HSP90AA1,SF3B1,CAV1,PARK7,SFN,RPS2,CRKL,WARS1,HLA-DRB1,LMNA,RPL5,HSP90AB1,PEF1,TXN,HSPA1A,IPO7,EMILIN1,XRCC5,G6PD,MVP,CD44,RHOA,EIF4G1,PPP2CA,PPIA,ACSL1,RACK1,MYO1C
GO:0009892	Negative regulation of metabolic process	87	2982	2.91751	0.2	0.00047	9606.ENSP00000157600,9606.ENSP00000216714,9606.ENSP00000221419,9606.ENSP00000221566,9606.ENSP00000223136,9606.ENSP00000225371,9606.ENSP00000225698,9606.ENSP00000231751,9606.ENSP00000245907,9606.ENSP00000247970,9606.ENSP00000254722,9606.ENSP00000254810,9606.ENSP00000259396,9606.ENSP00000261313,9606.ENSP00000261574,9606.ENSP00000262418,9606.ENSP00000263579,9606.ENSP00000265132,9606.ENSP00000268058,…	LMCD1,APEX1,HNRNPL,SGTA,FIS1,EPX,C1QBP,LTF,C3,PIN1,SERPINF1,H3-3B,ORM1,PEBP1,IPO5,SLC4A1,DCPS,AMBP,PML,IQGAP1,SOD1,AHSG,RPS3,GPD1L,LPCAT1,PGLYRP2,COL6A3,PRDX3,VPS35,PA2G4,SRP9,YWHAG,F2,GNAI2,HNRNPD,CALR,SERPINF2,PLEC,A2M,LIMS1,EZR,CAV1,PARK7,SFN,HMGB1,CTSB,ANXA2,CRKL,SND1,WARS1,HP,HLA-DRB1,APOA2,LMNA,BAG3,FLNA,RPL5,HSP90AB1,TXN,HSPG2,HSPA1A,ANXA1,IPO7,EMILIN1,YWHAQ,XRCC5,G6PD,MVP,GAPDH,ALAD,CD44,…
GO:0010605	Negative regulation of macromolecule metabolic process	80	2760	2.89855	0.2	0.0013	9606.ENSP00000157600,9606.ENSP00000216714,9606.ENSP00000221419,9606.ENSP00000221566,9606.ENSP00000225371,9606.ENSP00000225698,9606.ENSP00000231751,9606.ENSP00000245907,9606.ENSP00000247970,9606.ENSP00000254722,9606.ENSP00000254810,9606.ENSP00000259396,9606.ENSP00000261313,9606.ENSP00000261574,9606.ENSP00000263579,9606.ENSP00000265132,9606.ENSP00000268058,9606.ENSP00000273784,9606.ENSP00000278572,…	LMCD1,APEX1,HNRNPL,SGTA,EPX,C1QBP,LTF,C3,PIN1,SERPINF1,H3-3B,ORM1,PEBP1,IPO5,DCPS,AMBP,PML,AHSG,RPS3,GPD1L,PGLYRP2,COL6A3,PRDX3,VPS35,PA2G4,SRP9,YWHAG,F2,GNAI2,HNRNPD,CALR,SERPINF2,PLEC,A2M,LIMS1,EZR,CAV1,PARK7,SFN,HMGB1,CTSB,ANXA2,CRKL,SND1,WARS1,HLA-DRB1,APOA2,LMNA,BAG3,FLNA,RPL5,HSP90AB1,TXN,HSPG2,HSPA1A,ANXA1,IPO7,EMILIN1,YWHAQ,XRCC5,G6PD,MVP,GAPDH,ALAD,CD44,GPI,EIF4G1,PPP2CA,PPIA,RACK1,BANF1…
GO:1901576	Organic substance biosynthetic process	70	2438	2.87121	0.2	0.0052	9606.ENSP00000228740,9606.ENSP00000245206,9606.ENSP00000248342,9606.ENSP00000253039,9606.ENSP00000261772,9606.ENSP00000270625,9606.ENSP00000277865,9606.ENSP00000278572,9606.ENSP00000283415,9606.ENSP00000285093,9606.ENSP00000285930,9606.ENSP00000297258,9606.ENSP00000298556,9606.ENSP00000299198,9606.ENSP00000304592,9606.ENSP00000307940,9606.ENSP00000309092,9606.ENSP00000311430,9606.ENSP00000313199,…	LTA4H,GOT2,EIF3K,EIF2S3,AARS1,RPS11,GLUD1,RPS3,LPCAT1,ACAA2,AKR1B1,FABP5,HPRT1,CKB,FASN,EEF2,GMPPB,RPL4,HNRNPD,PFAS,MDH2,EEF1G,HSP90AA1,ISYNA1,EEF1A1,PARK7,RPS2,VAPA,RPL27A,ANXA2,RPL22,ALDH9A1,WARS1,COL4A2,RPL12,CYB5R1,MGST3,APOA2,MPP1,RPL5,PGM1,HSP90AB1,PGK1,RPS4X,HMGCL,RRBP1,HNRNPUL1,EEF1B2,NME2,G6PD,QPRT,RPL14,HAGH,DDT,PAICS,ALAD,RPSA,GPI,EEF1D,EIF4G1,ACSL1,OSTC,RACK1,RPL30,ENO2,RPS5,PTGES3,PH…
GO:0033554	Cellular response to stress	46	1572	2.92621	0.2	0.0407	9606.ENSP00000215832,9606.ENSP00000216714,9606.ENSP00000221419,9606.ENSP00000221566,9606.ENSP00000225275,9606.ENSP00000241052,9606.ENSP00000265132,9606.ENSP00000267257,9606.ENSP00000268058,9606.ENSP00000270142,9606.ENSP00000278572,9606.ENSP00000285093,9606.ENSP00000285930,9606.ENSP00000295897,9606.ENSP00000297991,9606.ENSP00000298510,9606.ENSP00000300289,9606.ENSP00000301764,9606.ENSP00000320866,…	MAPK1,APEX1,HNRNPL,SGTA,MPO,CAT,AMBP,PXN,PML,SOD1,RPS3,ACAA2,AKR1B1,ALB,AQP3,PRDX3,PDIA3,DDB1,CALR,PLEC,HSP90AA1,CAV1,HSPD1,PARK7,SFN,HMGB1,CRKL,GSTM3,COMT,LMNA,BAG3,HSP90AB1,PGK1,HSPA1A,ANXA1,XRCC5,GRB2,G6PD,FOLR1,ERO1A,RHOA,EIF4G1,PPIA,HSPA8,SERPINB6,SAMHD1
GO:0016043	Cellular component organization	153	5436	2.81457	0.19	5.73e-07	9606.ENSP00000210313,9606.ENSP00000216181,9606.ENSP00000216714,9606.ENSP00000219150,9606.ENSP00000221566,9606.ENSP00000222219,9606.ENSP00000223136,9606.ENSP00000225275,9606.ENSP00000225655,9606.ENSP00000225698,9606.ENSP00000236671,9606.ENSP00000245907,9606.ENSP00000246069,9606.ENSP00000247970,9606.ENSP00000248342,9606.ENSP00000248437,9606.ENSP00000252456,9606.ENSP00000252699,9606.ENSP00000252999,…	PSMD5,MYH9,APEX1,CORO1A,SGTA,DNASE2,FIS1,MPO,PFN1,C1QBP,CTSD,C3,DSTN,PIN1,EIF3K,TUBA4A,CNN1,ACTN4,LAMA5,EIF2S3,H3-3B,DYNC1LI2,RAB21,SLC4A1,C9,ADD1,ANK1,PXN,PML,IQGAP1,SH3GL1,SOD1,CISD2,RPS3,FERMT3,ACAA2,CCT3,FOLR2,PRDX3,HPRT1,VPS35,PDIA3,LMAN2,MZB1,FGB,RBM14,PDLIM2,TLN1,CALR,SERPINF2,PLEC,ZYX,TMED9,HSP90AA1,SF3B1,FGG,LIMS1,SEC23B,EZR,CAV1,HSPD1,PARK7,PPL,SFN,SNRPD2,HMGB1,VAPA,ANXA2,CRKL,ANXA6,ALD…
GO:1901564	Organonitrogen compound metabolic process	143	4981	2.87091	0.19	7.42e-07	9606.ENSP00000044462,9606.ENSP00000205948,9606.ENSP00000215832,9606.ENSP00000216181,9606.ENSP00000221566,9606.ENSP00000226299,9606.ENSP00000228740,9606.ENSP00000229268,9606.ENSP00000231751,9606.ENSP00000236671,9606.ENSP00000241052,9606.ENSP00000245206,9606.ENSP00000245907,9606.ENSP00000247970,9606.ENSP00000248342,9606.ENSP00000253039,9606.ENSP00000253496,9606.ENSP00000254810,9606.ENSP00000258317,…	PSMA4,APOH,MAPK1,MYH9,SGTA,LAP3,LTA4H,USP5,LTF,CTSD,CAT,GOT2,C3,PIN1,EIF3K,EIF2S3,F12,H3-3B,NPL,AARS1,BLVRB,KLKB1,AMBP,HPX,PML,COPS3,PFKL,SOD1,RPS11,TINAGL1,GLUD1,RPS3,LPCAT1,PGLYRP2,RNPEP,METAP1,FABP5,PRDX3,HPRT1,CKB,DDB1,HINT1,FGB,EEF2,F2,GMPPB,RPL4,RBM14,PFAS,PKM,CALR,BGN,EEF1G,HSP90AA1,FGG,EEF1A1,CAV1,HSPD1,PARK7,MAOA,RPS2,VAPA,CTSB,RPL27A,RPL22,ALDH9A1,WARS1,HP,SPTBN1,DPP4,GSTM3,COMT,RPL12,C…
GO:0009893	Positive regulation of metabolic process	110	3847	2.85937	0.19	6.47e-05	9606.ENSP00000215832,9606.ENSP00000216181,9606.ENSP00000216714,9606.ENSP00000216802,9606.ENSP00000221419,9606.ENSP00000221566,9606.ENSP00000223136,9606.ENSP00000225371,9606.ENSP00000225698,9606.ENSP00000229268,9606.ENSP00000231751,9606.ENSP00000236671,9606.ENSP00000245907,9606.ENSP00000247970,9606.ENSP00000252699,9606.ENSP00000253039,9606.ENSP00000253496,9606.ENSP00000258091,9606.ENSP00000259396,…	MAPK1,MYH9,APEX1,PSME2,HNRNPL,SGTA,FIS1,EPX,C1QBP,USP5,LTF,CTSD,C3,PIN1,ACTN4,EIF2S3,F12,CCT7,ORM1,DCPS,KLKB1,ANXA3,HPX,PML,IQGAP1,SOD1,RPS3,CCT5,LPCAT1,CCT3,FABP5,HPRT1,VPS35,DDB1,DCXR,MZB1,PCBP1,EEF2,F2,RBM14,GNAI2,HNRNPD,RAP2B,PKM,CALR,SERPINF2,FBN1,HSP90AA1,SF3B1,LIMS1,EZR,CAV1,HSPD1,PARK7,RPS2,PRDX6,HMGB1,ANXA2,CRKL,WARS1,DYNC1H1,SPTBN1,HLA-DRB1,AFDN,APOA2,LMNA,BAG3,RPL5,FUBP1,PDLIM1,HSP90AB…
GO:0010604	Positive regulation of macromolecule metabolic process	100	3533	2.83046	0.19	0.0003	9606.ENSP00000215832,9606.ENSP00000216181,9606.ENSP00000216714,9606.ENSP00000216802,9606.ENSP00000221419,9606.ENSP00000221566,9606.ENSP00000223136,9606.ENSP00000225371,9606.ENSP00000225698,9606.ENSP00000229268,9606.ENSP00000231751,9606.ENSP00000236671,9606.ENSP00000245907,9606.ENSP00000247970,9606.ENSP00000252699,9606.ENSP00000253039,9606.ENSP00000253496,9606.ENSP00000258091,9606.ENSP00000259396,…	MAPK1,MYH9,APEX1,PSME2,HNRNPL,SGTA,FIS1,EPX,C1QBP,USP5,LTF,CTSD,C3,PIN1,ACTN4,EIF2S3,F12,CCT7,ORM1,DCPS,KLKB1,ANXA3,HPX,PML,IQGAP1,SOD1,RPS3,CCT5,LPCAT1,CCT3,VPS35,DDB1,MZB1,PCBP1,EEF2,F2,RBM14,HNRNPD,RAP2B,PKM,CALR,SERPINF2,FBN1,HSP90AA1,SF3B1,LIMS1,EZR,CAV1,HSPD1,PARK7,RPS2,PRDX6,HMGB1,ANXA2,CRKL,WARS1,SPTBN1,HLA-DRB1,AFDN,APOA2,LMNA,RPL5,FUBP1,PDLIM1,HSP90AB1,RPS4X,PEF1,TXN,HSPA1A,ANXA1,EMILIN…
GO:0006725	Cellular aromatic compound metabolic process	83	2936	2.82698	0.19	0.002	9606.ENSP00000215832,9606.ENSP00000216714,9606.ENSP00000221419,9606.ENSP00000222219,9606.ENSP00000225698,9606.ENSP00000245206,9606.ENSP00000253363,9606.ENSP00000261772,9606.ENSP00000263368,9606.ENSP00000263579,9606.ENSP00000265132,9606.ENSP00000265983,9606.ENSP00000269848,9606.ENSP00000278572,9606.ENSP00000285930,9606.ENSP00000298556,9606.ENSP00000301764,9606.ENSP00000302886,9606.ENSP00000304229,…	MAPK1,APEX1,HNRNPL,DNASE2,C1QBP,GOT2,RBM39,AARS1,BLVRB,DCPS,AMBP,HPX,PFKL,RPS3,AKR1B1,HPRT1,DDB1,PA2G4,HINT1,GMPPB,RBM14,HNRNPD,PFAS,PKM,HSP90AA1,SF3B1,HSPD1,PARK7,MAOA,SNRPD2,HMGB1,CTSB,ANXA2,SND1,WARS1,COL4A2,GSTM3,COMT,MPP1,RPL5,PGAM1,PGM1,HSP90AB1,PGK1,HSPA1A,ACOT9,AKR1C1,HNRNPUL1,XRCC5,HNRNPA3,MTPN,NME2,FOLR1,QPRT,RPL14,GAPDH,DDT,PAICS,MYH8,ALAD,CSTF2,OGDH,SNRPG,RHOA,HNRNPF,GPI,EEF1D,DDX39B,…
GO:0050793	Regulation of developmental process	71	2492	2.84912	0.19	0.0056	9606.ENSP00000205948,9606.ENSP00000215832,9606.ENSP00000216181,9606.ENSP00000219150,9606.ENSP00000223136,9606.ENSP00000225698,9606.ENSP00000231751,9606.ENSP00000245907,9606.ENSP00000252699,9606.ENSP00000252999,9606.ENSP00000254722,9606.ENSP00000261263,9606.ENSP00000264758,9606.ENSP00000264908,9606.ENSP00000268058,9606.ENSP00000270142,9606.ENSP00000273784,9606.ENSP00000292609,9606.ENSP00000297991,…	APOH,MAPK1,MYH9,CORO1A,FIS1,C1QBP,LTF,C3,ACTN4,LAMA5,SERPINF1,RAB21,ADD1,ANXA3,PML,SOD1,AHSG,PGLYRP2,AQP3,VPS35,DDB1,PA2G4,FGB,YWHAG,F2,PKM,CALR,SERPINF2,FBN1,FGG,LIMS1,EZR,CAV1,SFN,HMGB1,ANXA2,CRKL,WARS1,HLA-DRB1,COL4A2,FLNA,TACSTD2,HSP90AB1,PGK1,HSPG2,HSPA1A,CLIC1,ANXA1,EMILIN1,DNM2,XRCC5,MTPN,NME2,G6PD,EFEMP1,ITGB1,GDI1,CD44,RHOA,EIF4G1,PPP2CA,RACK1,WDR1,DPYSL2,RNH1,DNM1L,TPT1,EPPK1,SPTA1,ALDO…
GO:0071840	Cellular component organization or biogenesis	156	5639	2.76645	0.18	1.01e-06	9606.ENSP00000210313,9606.ENSP00000216181,9606.ENSP00000216714,9606.ENSP00000219150,9606.ENSP00000221566,9606.ENSP00000222219,9606.ENSP00000223136,9606.ENSP00000225275,9606.ENSP00000225655,9606.ENSP00000225698,9606.ENSP00000236671,9606.ENSP00000245907,9606.ENSP00000246069,9606.ENSP00000247970,9606.ENSP00000248342,9606.ENSP00000248437,9606.ENSP00000252456,9606.ENSP00000252699,9606.ENSP00000252999,…	PSMD5,MYH9,APEX1,CORO1A,SGTA,DNASE2,FIS1,MPO,PFN1,C1QBP,CTSD,C3,DSTN,PIN1,EIF3K,TUBA4A,CNN1,ACTN4,LAMA5,EIF2S3,H3-3B,DYNC1LI2,RAB21,SLC4A1,C9,ADD1,ANK1,PXN,PML,IQGAP1,SH3GL1,SOD1,CISD2,RPS3,FERMT3,ACAA2,CCT3,FOLR2,PRDX3,HPRT1,VPS35,PDIA3,PA2G4,LMAN2,MZB1,FGB,RBM14,PDLIM2,TLN1,CALR,SERPINF2,PLEC,ZYX,TMED9,HSP90AA1,SF3B1,FGG,LIMS1,SEC23B,EZR,CAV1,HSPD1,PARK7,PPL,SFN,SNRPD2,HMGB1,VAPA,ANXA2,CRKL,ANX…
GO:0048519	Negative regulation of biological process	146	5313	2.74798	0.18	5.44e-06	9606.ENSP00000157600,9606.ENSP00000205948,9606.ENSP00000215832,9606.ENSP00000216181,9606.ENSP00000216714,9606.ENSP00000219150,9606.ENSP00000221419,9606.ENSP00000221566,9606.ENSP00000223136,9606.ENSP00000225275,9606.ENSP00000225371,9606.ENSP00000225655,9606.ENSP00000225698,9606.ENSP00000231751,9606.ENSP00000241052,9606.ENSP00000245907,9606.ENSP00000247970,9606.ENSP00000252456,9606.ENSP00000252699,…	LMCD1,APOH,MAPK1,MYH9,APEX1,CORO1A,HNRNPL,SGTA,FIS1,MPO,EPX,PFN1,C1QBP,LTF,CAT,C3,PIN1,CNN1,ACTN4,F12,SERPINF1,H3-3B,ORM1,PEBP1,IPO5,AARS1,SLC4A1,DCPS,KLKB1,ADD1,AMBP,PML,IQGAP1,PFKL,SOD1,AHSG,RPS3,GPD1L,LPCAT1,ACAA2,AKR1B1,PGLYRP2,COL6A3,ALB,FABP5,PRDX3,VPS35,DDB1,PA2G4,SRP9,FGB,YWHAG,F2,RBM14,GNAI2,HNRNPD,RAP2B,CALR,SERPINF2,PLEC,A2M,FBN1,FGG,LIMS1,EZR,CAV1,HSPD1,PARK7,SFN,HMGB1,CTSB,ANXA2,CRKL…
GO:1901360	Organic cyclic compound metabolic process	89	3181	2.79786	0.18	0.0015	9606.ENSP00000215832,9606.ENSP00000216714,9606.ENSP00000221419,9606.ENSP00000222219,9606.ENSP00000225698,9606.ENSP00000241052,9606.ENSP00000245206,9606.ENSP00000253363,9606.ENSP00000261772,9606.ENSP00000263368,9606.ENSP00000263579,9606.ENSP00000265132,9606.ENSP00000265983,9606.ENSP00000269848,9606.ENSP00000278572,9606.ENSP00000285093,9606.ENSP00000285930,9606.ENSP00000298556,9606.ENSP00000301764,…	MAPK1,APEX1,HNRNPL,DNASE2,C1QBP,CAT,GOT2,RBM39,AARS1,BLVRB,DCPS,AMBP,HPX,PFKL,RPS3,ACAA2,AKR1B1,HPRT1,DDB1,PA2G4,HINT1,GMPPB,RBM14,HNRNPD,PFAS,PKM,HSP90AA1,SF3B1,HSPD1,PARK7,MAOA,SNRPD2,HMGB1,CTSB,ANXA2,SND1,WARS1,COL4A2,GSTM3,COMT,CYB5R1,APOA2,MPP1,RPL5,PGAM1,PGM1,HSP90AB1,PGK1,HSPA1A,ACOT9,AKR1C1,HNRNPUL1,XRCC5,HNRNPA3,MTPN,NME2,G6PD,FOLR1,QPRT,RPL14,GAPDH,DDT,PAICS,MYH8,ALAD,CSTF2,OGDH,SNRPG,R…
GO:0044237	Cellular metabolic process	178	6568	2.71011	0.17	2.2e-07	9606.ENSP00000044462,9606.ENSP00000205948,9606.ENSP00000215832,9606.ENSP00000216714,9606.ENSP00000221418,9606.ENSP00000221419,9606.ENSP00000221566,9606.ENSP00000222219,9606.ENSP00000223136,9606.ENSP00000225275,9606.ENSP00000225371,9606.ENSP00000225698,9606.ENSP00000228740,9606.ENSP00000229268,9606.ENSP00000236671,9606.ENSP00000241052,9606.ENSP00000245206,9606.ENSP00000245907,9606.ENSP00000248342,…	PSMA4,APOH,MAPK1,APEX1,ECH1,HNRNPL,SGTA,DNASE2,FIS1,MPO,EPX,C1QBP,LTA4H,USP5,CTSD,CAT,GOT2,C3,EIF3K,PGLS,EIF2S3,RBM39,H3-3B,NPL,ALDH2,AARS1,BLVRB,DCPS,AMBP,HPX,PML,COPS3,PFKL,SOD1,RPS11,CISD2,GLUD1,RPS3,GPD1L,LPCAT1,ACAA2,AKR1B1,PGLYRP2,FABP5,PRDX3,HPRT1,CKB,DDB1,PA2G4,HINT1,FASN,ADH1B,EEF2,GMPPB,RPL4,RBM14,HNRNPD,GRHPR,PFAS,CYC1,PKM,CALR,TALDO1,PLEC,HADHB,MDH2,BGN,EEF1G,HSP90AA1,SF3B1,ISYNA1,EEF…
GO:0048518	Positive regulation of biological process	170	6207	2.73884	0.17	2.79e-07	9606.ENSP00000157600,9606.ENSP00000205948,9606.ENSP00000215832,9606.ENSP00000216181,9606.ENSP00000216714,9606.ENSP00000216802,9606.ENSP00000219150,9606.ENSP00000221419,9606.ENSP00000221566,9606.ENSP00000223136,9606.ENSP00000225371,9606.ENSP00000225655,9606.ENSP00000225698,9606.ENSP00000229268,9606.ENSP00000231751,9606.ENSP00000236671,9606.ENSP00000241052,9606.ENSP00000245907,9606.ENSP00000246069,…	LMCD1,APOH,MAPK1,MYH9,APEX1,PSME2,CORO1A,HNRNPL,SGTA,FIS1,EPX,PFN1,C1QBP,USP5,LTF,CTSD,CAT,C3,DSTN,PIN1,ACTN4,EIF2S3,F12,SERPINF1,H3-3B,CCT7,ORM1,RAB21,IPO5,C9,DCPS,KLKB1,ADD1,ANXA3,HPX,PXN,PML,IQGAP1,SOD1,AHSG,GLUD1,RPS3,FERMT3,CCT5,GPD1L,LPCAT1,STOM,CCT3,PPBP,FABP5,AQP3,FOLR2,PRDX3,HPRT1,VPS35,PDIA3,DDB1,PA2G4,DCXR,LMAN2,MZB1,HINT1,PCBP1,FGB,EEF2,F2,RBM14,GNAI2,HNRNPD,RAP2B,PKM,CALR,SERPINF2,FB…
GO:0048523	Negative regulation of cellular process	128	4736	2.7027	0.17	8.82e-05	9606.ENSP00000157600,9606.ENSP00000205948,9606.ENSP00000215832,9606.ENSP00000216181,9606.ENSP00000216714,9606.ENSP00000219150,9606.ENSP00000221419,9606.ENSP00000221566,9606.ENSP00000223136,9606.ENSP00000225275,9606.ENSP00000225655,9606.ENSP00000225698,9606.ENSP00000231751,9606.ENSP00000241052,9606.ENSP00000247970,9606.ENSP00000252456,9606.ENSP00000252699,9606.ENSP00000254722,9606.ENSP00000254810,…	LMCD1,APOH,MAPK1,MYH9,APEX1,CORO1A,HNRNPL,SGTA,FIS1,MPO,PFN1,C1QBP,LTF,CAT,PIN1,CNN1,ACTN4,SERPINF1,H3-3B,PEBP1,IPO5,AARS1,SLC4A1,DCPS,ADD1,AMBP,PML,IQGAP1,PFKL,SOD1,AHSG,RPS3,GPD1L,LPCAT1,ACAA2,AKR1B1,PGLYRP2,ALB,FABP5,PRDX3,VPS35,DDB1,PA2G4,SRP9,FGB,YWHAG,F2,RBM14,GNAI2,HNRNPD,RAP2B,CALR,PLEC,FBN1,FGG,LIMS1,EZR,CAV1,HSPD1,PARK7,SFN,HMGB1,ANXA2,CRKL,ANXA6,WARS1,HP,SPTBN1,SUSD2,HLA-DRB1,MAP4,DPP4…
GO:0048583	Regulation of response to stimulus	106	3931	2.69651	0.17	0.00095	9606.ENSP00000157600,9606.ENSP00000205948,9606.ENSP00000215832,9606.ENSP00000221566,9606.ENSP00000222219,9606.ENSP00000223136,9606.ENSP00000225698,9606.ENSP00000231751,9606.ENSP00000241052,9606.ENSP00000245907,9606.ENSP00000247970,9606.ENSP00000252699,9606.ENSP00000253496,9606.ENSP00000254722,9606.ENSP00000261313,9606.ENSP00000263408,9606.ENSP00000264690,9606.ENSP00000265132,9606.ENSP00000265983,…	LMCD1,APOH,MAPK1,SGTA,DNASE2,FIS1,C1QBP,LTF,CAT,C3,PIN1,ACTN4,F12,SERPINF1,PEBP1,C9,KLKB1,AMBP,HPX,PXN,PML,IQGAP1,COPS3,SOD1,AHSG,RPS3,GPD1L,ACAA2,PGLYRP2,FABP5,VPS35,PDIA3,MZB1,HINT1,FGB,YWHAG,F2,RBM14,GNAI2,CALR,SERPINF2,A2M,ZYX,FBN1,LAMP1,HSP90AA1,FGG,LIMS1,EZR,CAV1,HSPD1,PARK7,MAOA,HMGB1,VAPA,ANXA2,CRKL,SPTBN1,HLA-DRB1,DPP4,CFH,LMNA,LAMTOR2,MPP1,FLNA,RPL5,HSP90AB1,VDAC2,TXN,HSPA1A,ANXA1,EMILI…
GO:0048513	Animal organ development	87	3246	2.68022	0.17	0.0065	9606.ENSP00000215832,9606.ENSP00000216181,9606.ENSP00000222219,9606.ENSP00000228740,9606.ENSP00000231751,9606.ENSP00000241052,9606.ENSP00000252999,9606.ENSP00000254722,9606.ENSP00000254810,9606.ENSP00000261772,9606.ENSP00000262418,9606.ENSP00000264908,9606.ENSP00000268058,9606.ENSP00000268182,9606.ENSP00000270142,9606.ENSP00000277865,9606.ENSP00000283415,9606.ENSP00000285930,9606.ENSP00000295550,…	MAPK1,MYH9,DNASE2,LTA4H,LTF,CAT,LAMA5,SERPINF1,H3-3B,AARS1,SLC4A1,ANXA3,PML,IQGAP1,SOD1,GLUD1,LPCAT1,AKR1B1,COL6A3,AQP3,PRDX3,HPRT1,CKB,FASN,EEF2,PDLIM2,HNRNPD,CALR,PLEC,A2M,FBN1,BGN,CAV1,PPL,SFN,HMGB1,CTSB,ANXA2,RPL22,CRKL,ANXA6,PLS3,HLA-DRB1,APOA2,LMNA,BAG3,FLNA,TACSTD2,PDLIM1,HSP90AB1,GLO1,PEF1,CLIC4,HSPG2,ANXA1,GNB1,EMILIN1,YWHAQ,XRCC5,GRB2,TAGLN,MTPN,G6PD,FOLR1,ACTN1,EFEMP1,PSAP,ITGB1,MYH11,…
GO:0044249	Cellular biosynthetic process	64	2362	2.70957	0.17	0.0333	9606.ENSP00000228740,9606.ENSP00000245206,9606.ENSP00000248342,9606.ENSP00000253039,9606.ENSP00000261772,9606.ENSP00000270142,9606.ENSP00000270625,9606.ENSP00000277865,9606.ENSP00000278572,9606.ENSP00000283415,9606.ENSP00000285930,9606.ENSP00000297258,9606.ENSP00000298556,9606.ENSP00000304592,9606.ENSP00000307940,9606.ENSP00000309092,9606.ENSP00000311430,9606.ENSP00000313199,9606.ENSP00000313490,…	LTA4H,GOT2,EIF3K,EIF2S3,AARS1,SOD1,RPS11,GLUD1,RPS3,LPCAT1,AKR1B1,FABP5,HPRT1,FASN,EEF2,GMPPB,RPL4,HNRNPD,PFAS,EEF1G,HSP90AA1,ISYNA1,EEF1A1,CAV1,PARK7,RPS2,VAPA,RPL27A,ANXA2,RPL22,ALDH9A1,WARS1,COL4A2,RPL12,MGST3,APOA2,MPP1,RPL5,HSP90AB1,RPS4X,HMGCL,RRBP1,HNRNPUL1,EEF1B2,NME2,QPRT,RPL14,HAGH,DDT,PAICS,ALAD,RPSA,EEF1D,MPST,EIF4G1,ACSL1,OSTC,RACK1,RPL30,RPS5,PTGES3,PHGDH,SPTA1,ALDOA
GO:0050896	Response to stimulus	208	7835	2.65475	0.16	1.47e-08	9606.ENSP00000205948,9606.ENSP00000215832,9606.ENSP00000216181,9606.ENSP00000216714,9606.ENSP00000219150,9606.ENSP00000221419,9606.ENSP00000221566,9606.ENSP00000223136,9606.ENSP00000225275,9606.ENSP00000225371,9606.ENSP00000225698,9606.ENSP00000228740,9606.ENSP00000231751,9606.ENSP00000241052,9606.ENSP00000245206,9606.ENSP00000245907,9606.ENSP00000247970,9606.ENSP00000252699,9606.ENSP00000252999,…	APOH,MAPK1,MYH9,APEX1,CORO1A,HNRNPL,SGTA,FIS1,MPO,EPX,C1QBP,LTA4H,LTF,CAT,GOT2,C3,PIN1,ACTN4,LAMA5,F12,SERPINF1,DYNC1LI2,ORM1,RAB21,IPO5,SLC4A1,C9,DCPS,KLKB1,ADD1,ANXA3,AMBP,ANK1,HPX,PXN,PML,IQGAP1,COPS3,PFKL,SH3GL1,SOD1,BCAM,AHSG,RPS3,FERMT3,CCT5,ACAA2,AKR1B1,PGLYRP2,ALB,PPBP,METAP1,AQP3,FOLR2,PRDX3,HPRT1,VPS35,PDIA3,DDB1,HINT1,FASN,GNB2,FGB,YWHAG,F2,RBM14,GNAI2,HNRNPD,PFAS,TLN1,CYC1,RAP2B,PKM,C…
GO:0008152	Metabolic process	210	7988	2.62894	0.16	1.97e-08	9606.ENSP00000044462,9606.ENSP00000205948,9606.ENSP00000215832,9606.ENSP00000216181,9606.ENSP00000216714,9606.ENSP00000221418,9606.ENSP00000221419,9606.ENSP00000221566,9606.ENSP00000222219,9606.ENSP00000223136,9606.ENSP00000225275,9606.ENSP00000225371,9606.ENSP00000225698,9606.ENSP00000226299,9606.ENSP00000228740,9606.ENSP00000229268,9606.ENSP00000231751,9606.ENSP00000236671,9606.ENSP00000241052,…	PSMA4,APOH,MAPK1,MYH9,APEX1,ECH1,HNRNPL,SGTA,DNASE2,FIS1,MPO,EPX,C1QBP,LAP3,LTA4H,USP5,LTF,CTSD,CAT,GOT2,C3,PIN1,EIF3K,PGLS,EIF2S3,RBM39,F12,H3-3B,NPL,ALDH2,AARS1,BLVRB,DCPS,KLKB1,AMBP,HPX,PML,COPS3,PFKL,SOD1,RPS11,TINAGL1,CISD2,GLUD1,RPS3,GPD1L,LPCAT1,ACAA2,AKR1B1,PGLYRP2,RNPEP,METAP1,FABP5,PRDX3,HPRT1,CKB,DDB1,PA2G4,DCXR,HINT1,FASN,FGB,ADH1B,EEF2,F2,GMPPB,RPL4,RBM14,HNRNPD,GRHPR,PFAS,CYC1,PKM,C…
GO:0071704	Organic substance metabolic process	199	7522	2.64557	0.16	5.42e-08	9606.ENSP00000044462,9606.ENSP00000205948,9606.ENSP00000215832,9606.ENSP00000216181,9606.ENSP00000216714,9606.ENSP00000221418,9606.ENSP00000221419,9606.ENSP00000221566,9606.ENSP00000222219,9606.ENSP00000225275,9606.ENSP00000225698,9606.ENSP00000226299,9606.ENSP00000228740,9606.ENSP00000229268,9606.ENSP00000231751,9606.ENSP00000236671,9606.ENSP00000241052,9606.ENSP00000245206,9606.ENSP00000245907,…	PSMA4,APOH,MAPK1,MYH9,APEX1,ECH1,HNRNPL,SGTA,DNASE2,MPO,C1QBP,LAP3,LTA4H,USP5,LTF,CTSD,CAT,GOT2,C3,PIN1,EIF3K,PGLS,EIF2S3,RBM39,F12,H3-3B,NPL,ALDH2,AARS1,BLVRB,DCPS,KLKB1,AMBP,HPX,PML,COPS3,PFKL,SOD1,RPS11,TINAGL1,GLUD1,RPS3,GPD1L,LPCAT1,ACAA2,AKR1B1,PGLYRP2,RNPEP,METAP1,FABP5,PRDX3,HPRT1,CKB,DDB1,PA2G4,DCXR,HINT1,FASN,FGB,ADH1B,EEF2,F2,GMPPB,RPL4,RBM14,HNRNPD,GRHPR,PFAS,PKM,CALR,TALDO1,PLEC,HADH…
GO:0048522	Positive regulation of cellular process	149	5584	2.66834	0.16	1.83e-05	9606.ENSP00000157600,9606.ENSP00000215832,9606.ENSP00000216714,9606.ENSP00000219150,9606.ENSP00000221419,9606.ENSP00000221566,9606.ENSP00000223136,9606.ENSP00000225655,9606.ENSP00000225698,9606.ENSP00000229268,9606.ENSP00000231751,9606.ENSP00000236671,9606.ENSP00000241052,9606.ENSP00000245907,9606.ENSP00000246069,9606.ENSP00000247970,9606.ENSP00000252699,9606.ENSP00000253039,9606.ENSP00000254722,…	LMCD1,MAPK1,APEX1,CORO1A,HNRNPL,SGTA,FIS1,PFN1,C1QBP,USP5,LTF,CTSD,CAT,C3,DSTN,PIN1,ACTN4,EIF2S3,SERPINF1,H3-3B,CCT7,RAB21,IPO5,DCPS,ADD1,ANXA3,HPX,PXN,PML,IQGAP1,SOD1,GLUD1,RPS3,FERMT3,CCT5,GPD1L,STOM,CCT3,PPBP,FABP5,FOLR2,PRDX3,HPRT1,VPS35,PDIA3,DDB1,PA2G4,DCXR,MZB1,HINT1,PCBP1,FGB,EEF2,F2,RBM14,GNAI2,HNRNPD,RAP2B,PKM,CALR,SERPINF2,FBN1,TMED9,LAMP1,HSP90AA1,SF3B1,FGG,LIMS1,EZR,CAV1,NDUFA4,HSPD1…
GO:0051173	Positive regulation of nitrogen compound metabolic process	83	3166	2.6216	0.16	0.0166	9606.ENSP00000215832,9606.ENSP00000216181,9606.ENSP00000216714,9606.ENSP00000216802,9606.ENSP00000221419,9606.ENSP00000221566,9606.ENSP00000223136,9606.ENSP00000225698,9606.ENSP00000229268,9606.ENSP00000231751,9606.ENSP00000236671,9606.ENSP00000245907,9606.ENSP00000247970,9606.ENSP00000252699,9606.ENSP00000253039,9606.ENSP00000253496,9606.ENSP00000258091,9606.ENSP00000263579,9606.ENSP00000264690,…	MAPK1,MYH9,APEX1,PSME2,HNRNPL,SGTA,FIS1,C1QBP,USP5,LTF,CTSD,C3,PIN1,ACTN4,EIF2S3,F12,CCT7,DCPS,KLKB1,ANXA3,HPX,PML,IQGAP1,RPS3,CCT5,LPCAT1,CCT3,HPRT1,VPS35,DDB1,PCBP1,EEF2,F2,RBM14,HNRNPD,RAP2B,PKM,SERPINF2,FBN1,HSP90AA1,SF3B1,EZR,CAV1,HSPD1,PARK7,RPS2,PRDX6,HMGB1,ANXA2,CRKL,HLA-DRB1,LMNA,RPL5,PDLIM1,HSP90AB1,RPS4X,PEF1,TXN,HSPA1A,DNM2,XRCC5,MTPN,NME2,ACTN1,CCT4,TF,CD44,RHOA,EIF4G1,DDX39B,PPP2CA,…
GO:0019222	Regulation of metabolic process	174	6784	2.56486	0.15	1.14e-05	9606.ENSP00000157600,9606.ENSP00000215832,9606.ENSP00000216181,9606.ENSP00000216714,9606.ENSP00000216802,9606.ENSP00000221419,9606.ENSP00000221566,9606.ENSP00000223136,9606.ENSP00000225371,9606.ENSP00000225655,9606.ENSP00000225698,9606.ENSP00000229268,9606.ENSP00000231751,9606.ENSP00000236671,9606.ENSP00000241052,9606.ENSP00000245907,9606.ENSP00000247970,9606.ENSP00000248342,9606.ENSP00000252699,…	LMCD1,MAPK1,MYH9,APEX1,PSME2,HNRNPL,SGTA,FIS1,EPX,PFN1,C1QBP,USP5,LTF,CTSD,CAT,C3,PIN1,EIF3K,ACTN4,EIF2S3,RBM39,F12,SERPINF1,H3-3B,CCT7,ORM1,PEBP1,IPO5,ALDH2,AARS1,SLC4A1,DCPS,KLKB1,ANXA3,AMBP,HPX,PXN,PML,IQGAP1,COPS3,SOD1,AHSG,CISD2,RPS3,CCT5,GPD1L,LPCAT1,PGLYRP2,COL6A3,CCT3,METAP1,FABP5,PRDX3,HPRT1,VPS35,DDB1,PA2G4,DCXR,MZB1,HINT1,SRP9,PCBP1,YWHAG,EEF2,F2,RBM14,GNAI2,HNRNPD,RAP2B,PKM,CALR,SERPI…
GO:0006807	Nitrogen compound metabolic process	171	6643	2.57414	0.15	1.22e-05	9606.ENSP00000044462,9606.ENSP00000205948,9606.ENSP00000215832,9606.ENSP00000216181,9606.ENSP00000216714,9606.ENSP00000221419,9606.ENSP00000221566,9606.ENSP00000222219,9606.ENSP00000225698,9606.ENSP00000226299,9606.ENSP00000228740,9606.ENSP00000229268,9606.ENSP00000231751,9606.ENSP00000236671,9606.ENSP00000241052,9606.ENSP00000245206,9606.ENSP00000245907,9606.ENSP00000247970,9606.ENSP00000248342,…	PSMA4,APOH,MAPK1,MYH9,APEX1,HNRNPL,SGTA,DNASE2,C1QBP,LAP3,LTA4H,USP5,LTF,CTSD,CAT,GOT2,C3,PIN1,EIF3K,EIF2S3,RBM39,F12,H3-3B,NPL,AARS1,BLVRB,DCPS,KLKB1,AMBP,HPX,PML,COPS3,PFKL,SOD1,RPS11,TINAGL1,GLUD1,RPS3,LPCAT1,AKR1B1,PGLYRP2,RNPEP,METAP1,FABP5,PRDX3,HPRT1,CKB,DDB1,PA2G4,HINT1,FGB,EEF2,F2,GMPPB,RPL4,RBM14,HNRNPD,PFAS,PKM,CALR,BGN,EEF1G,HSP90AA1,SF3B1,FGG,EEF1A1,CAV1,HSPD1,PARK7,MAOA,RPS2,SNRPD2,…
GO:0009966	Regulation of signal transduction	77	2978	2.58563	0.15	0.035	9606.ENSP00000157600,9606.ENSP00000215832,9606.ENSP00000223136,9606.ENSP00000225698,9606.ENSP00000231751,9606.ENSP00000241052,9606.ENSP00000245907,9606.ENSP00000247970,9606.ENSP00000252699,9606.ENSP00000261313,9606.ENSP00000265132,9606.ENSP00000265983,9606.ENSP00000267257,9606.ENSP00000268058,9606.ENSP00000268182,9606.ENSP00000268717,9606.ENSP00000270142,9606.ENSP00000273784,9606.ENSP00000278572,…	LMCD1,MAPK1,FIS1,C1QBP,LTF,CAT,C3,PIN1,ACTN4,PEBP1,AMBP,HPX,PXN,PML,IQGAP1,COPS3,SOD1,AHSG,RPS3,GPD1L,ACAA2,FABP5,VPS35,PDIA3,MZB1,HINT1,FGB,YWHAG,F2,GNAI2,CALR,SERPINF2,FBN1,HSP90AA1,FGG,LIMS1,EZR,CAV1,PARK7,MAOA,HMGB1,VAPA,CRKL,SPTBN1,HLA-DRB1,LMNA,LAMTOR2,FLNA,RPL5,HSP90AB1,VDAC2,TXN,HSPA1A,EMILIN1,SEC13,DNM2,GRB2,FOLR1,MVP,ITGB1,GAPDH,DDT,CD14,CD44,RHOA,EEF1D,DDX39B,PPP2CA,PPIA,RACK1,DNM1L,TP…
GO:0060255	Regulation of macromolecule metabolic process	157	6249	2.5124	0.14	0.00018	9606.ENSP00000157600,9606.ENSP00000215832,9606.ENSP00000216181,9606.ENSP00000216714,9606.ENSP00000216802,9606.ENSP00000221419,9606.ENSP00000221566,9606.ENSP00000223136,9606.ENSP00000225371,9606.ENSP00000225655,9606.ENSP00000225698,9606.ENSP00000229268,9606.ENSP00000231751,9606.ENSP00000236671,9606.ENSP00000241052,9606.ENSP00000245907,9606.ENSP00000247970,9606.ENSP00000248342,9606.ENSP00000252699,…	LMCD1,MAPK1,MYH9,APEX1,PSME2,HNRNPL,SGTA,FIS1,EPX,PFN1,C1QBP,USP5,LTF,CTSD,CAT,C3,PIN1,EIF3K,ACTN4,EIF2S3,RBM39,F12,SERPINF1,H3-3B,CCT7,ORM1,PEBP1,IPO5,AARS1,DCPS,KLKB1,ANXA3,AMBP,HPX,PXN,PML,IQGAP1,COPS3,SOD1,AHSG,RPS3,CCT5,GPD1L,LPCAT1,PGLYRP2,COL6A3,CCT3,METAP1,PRDX3,VPS35,DDB1,PA2G4,MZB1,HINT1,SRP9,PCBP1,YWHAG,EEF2,F2,RBM14,GNAI2,HNRNPD,RAP2B,PKM,CALR,SERPINF2,PLEC,A2M,FBN1,EEF1G,HSP90AA1,SF3…
GO:0080090	Regulation of primary metabolic process	148	5899	2.5089	0.14	0.00044	9606.ENSP00000157600,9606.ENSP00000215832,9606.ENSP00000216181,9606.ENSP00000216714,9606.ENSP00000216802,9606.ENSP00000221419,9606.ENSP00000221566,9606.ENSP00000223136,9606.ENSP00000225655,9606.ENSP00000225698,9606.ENSP00000229268,9606.ENSP00000231751,9606.ENSP00000236671,9606.ENSP00000241052,9606.ENSP00000245907,9606.ENSP00000247970,9606.ENSP00000248342,9606.ENSP00000252699,9606.ENSP00000253039,…	LMCD1,MAPK1,MYH9,APEX1,PSME2,HNRNPL,SGTA,FIS1,PFN1,C1QBP,USP5,LTF,CTSD,CAT,C3,PIN1,EIF3K,ACTN4,EIF2S3,RBM39,F12,SERPINF1,CCT7,PEBP1,IPO5,ALDH2,AARS1,SLC4A1,DCPS,KLKB1,ANXA3,AMBP,HPX,PXN,PML,IQGAP1,COPS3,SOD1,AHSG,RPS3,CCT5,GPD1L,LPCAT1,COL6A3,CCT3,METAP1,FABP5,PRDX3,HPRT1,VPS35,DDB1,PA2G4,HINT1,SRP9,PCBP1,YWHAG,EEF2,F2,RBM14,GNAI2,HNRNPD,RAP2B,PKM,CALR,SERPINF2,PLEC,A2M,FBN1,EEF1G,HSP90AA1,SF3B1,…
GO:0051171	Regulation of nitrogen compound metabolic process	144	5734	2.51134	0.14	0.00059	9606.ENSP00000157600,9606.ENSP00000215832,9606.ENSP00000216181,9606.ENSP00000216714,9606.ENSP00000216802,9606.ENSP00000221419,9606.ENSP00000221566,9606.ENSP00000223136,9606.ENSP00000225655,9606.ENSP00000225698,9606.ENSP00000229268,9606.ENSP00000231751,9606.ENSP00000236671,9606.ENSP00000241052,9606.ENSP00000245907,9606.ENSP00000247970,9606.ENSP00000248342,9606.ENSP00000252699,9606.ENSP00000253039,…	LMCD1,MAPK1,MYH9,APEX1,PSME2,HNRNPL,SGTA,FIS1,PFN1,C1QBP,USP5,LTF,CTSD,CAT,C3,PIN1,EIF3K,ACTN4,EIF2S3,RBM39,F12,SERPINF1,CCT7,PEBP1,IPO5,ALDH2,AARS1,SLC4A1,DCPS,KLKB1,ANXA3,AMBP,HPX,PXN,PML,IQGAP1,COPS3,SOD1,AHSG,RPS3,CCT5,GPD1L,LPCAT1,COL6A3,CCT3,METAP1,PRDX3,HPRT1,VPS35,DDB1,PA2G4,HINT1,SRP9,PCBP1,YWHAG,EEF2,F2,RBM14,GNAI2,HNRNPD,RAP2B,PKM,CALR,SERPINF2,PLEC,A2M,FBN1,EEF1G,HSP90AA1,SF3B1,LIMS1,…
GO:0048856	Anatomical structure development	128	5117	2.50147	0.14	0.0026	9606.ENSP00000215832,9606.ENSP00000216181,9606.ENSP00000222219,9606.ENSP00000223136,9606.ENSP00000225655,9606.ENSP00000228740,9606.ENSP00000231751,9606.ENSP00000241052,9606.ENSP00000245907,9606.ENSP00000247970,9606.ENSP00000252699,9606.ENSP00000252999,9606.ENSP00000254722,9606.ENSP00000254810,9606.ENSP00000261772,9606.ENSP00000262418,9606.ENSP00000264908,9606.ENSP00000267257,9606.ENSP00000268058,…	MAPK1,MYH9,DNASE2,FIS1,PFN1,LTA4H,LTF,CAT,C3,PIN1,ACTN4,LAMA5,SERPINF1,H3-3B,AARS1,SLC4A1,ANXA3,PXN,PML,IQGAP1,COPS3,SH3GL1,SOD1,AHSG,GLUD1,FERMT3,LPCAT1,AKR1B1,COL6A3,FABP5,AQP3,PRDX3,HPRT1,VPS35,CKB,DDB1,FASN,EEF2,PDLIM2,HNRNPD,PFAS,CALR,SERPINF2,PLEC,A2M,FBN1,BGN,HSP90AA1,FGG,EZR,CAV1,HSPD1,PPL,SFN,HMGB1,VAPA,CTSB,ANXA2,RPL22,CRKL,ANXA6,WARS1,PLS3,SPTBN1,HLA-DRB1,MAP4,COL4A2,NCKAP1,GSTM3,COL6A…
GO:0048731	System development	98	3867	2.53426	0.14	0.0146	9606.ENSP00000215832,9606.ENSP00000216181,9606.ENSP00000222219,9606.ENSP00000225655,9606.ENSP00000228740,9606.ENSP00000231751,9606.ENSP00000241052,9606.ENSP00000245907,9606.ENSP00000247970,9606.ENSP00000252999,9606.ENSP00000254722,9606.ENSP00000254810,9606.ENSP00000261772,9606.ENSP00000262418,9606.ENSP00000264908,9606.ENSP00000268058,9606.ENSP00000268182,9606.ENSP00000269886,9606.ENSP00000270142,…	MAPK1,MYH9,DNASE2,PFN1,LTA4H,LTF,CAT,C3,PIN1,LAMA5,SERPINF1,H3-3B,AARS1,SLC4A1,ANXA3,PML,IQGAP1,SH3GL1,SOD1,AHSG,GLUD1,LPCAT1,AKR1B1,PRDX3,HPRT1,VPS35,CKB,FASN,EEF2,PDLIM2,HNRNPD,CALR,SERPINF2,PLEC,A2M,FBN1,BGN,HSP90AA1,CAV1,HSPD1,HMGB1,VAPA,CTSB,ANXA2,RPL22,CRKL,ANXA6,WARS1,PLS3,SPTBN1,HLA-DRB1,MAP4,COL4A2,NCKAP1,GSTM3,LMNA,S100A6,BAG3,FLNA,TACSTD2,PDLIM1,HSP90AB1,GLO1,CLIC4,HSPG2,ANXA1,GNB1,EMI…
GO:0044238	Primary metabolic process	178	7156	2.48742	0.13	4.75e-05	9606.ENSP00000044462,9606.ENSP00000205948,9606.ENSP00000215832,9606.ENSP00000216181,9606.ENSP00000216714,9606.ENSP00000221418,9606.ENSP00000221419,9606.ENSP00000221566,9606.ENSP00000222219,9606.ENSP00000225698,9606.ENSP00000226299,9606.ENSP00000228740,9606.ENSP00000229268,9606.ENSP00000231751,9606.ENSP00000236671,9606.ENSP00000241052,9606.ENSP00000245206,9606.ENSP00000245907,9606.ENSP00000247970,…	PSMA4,APOH,MAPK1,MYH9,APEX1,ECH1,HNRNPL,SGTA,DNASE2,C1QBP,LAP3,LTA4H,USP5,LTF,CTSD,CAT,GOT2,C3,PIN1,EIF3K,PGLS,EIF2S3,RBM39,F12,H3-3B,NPL,ALDH2,AARS1,DCPS,KLKB1,AMBP,HPX,PML,COPS3,PFKL,RPS11,TINAGL1,GLUD1,RPS3,GPD1L,LPCAT1,ACAA2,AKR1B1,RNPEP,METAP1,FABP5,PRDX3,HPRT1,DDB1,PA2G4,DCXR,HINT1,FASN,FGB,ADH1B,EEF2,F2,GMPPB,RPL4,RBM14,HNRNPD,PFAS,PKM,CALR,TALDO1,HADHB,FBN1,MDH2,BGN,EEF1G,HSP90AA1,SF3B1,F…
GO:0051716	Cellular response to stimulus	156	6357	2.45399	0.13	0.00067	9606.ENSP00000215832,9606.ENSP00000216181,9606.ENSP00000216714,9606.ENSP00000219150,9606.ENSP00000221419,9606.ENSP00000221566,9606.ENSP00000223136,9606.ENSP00000225275,9606.ENSP00000225371,9606.ENSP00000225698,9606.ENSP00000241052,9606.ENSP00000245907,9606.ENSP00000252699,9606.ENSP00000252999,9606.ENSP00000254722,9606.ENSP00000258198,9606.ENSP00000261263,9606.ENSP00000261574,9606.ENSP00000263579,…	MAPK1,MYH9,APEX1,CORO1A,HNRNPL,SGTA,FIS1,MPO,EPX,C1QBP,CAT,C3,ACTN4,LAMA5,SERPINF1,DYNC1LI2,RAB21,IPO5,DCPS,ADD1,AMBP,ANK1,HPX,PXN,PML,IQGAP1,COPS3,SH3GL1,SOD1,BCAM,RPS3,FERMT3,ACAA2,AKR1B1,ALB,PPBP,AQP3,FOLR2,PRDX3,VPS35,PDIA3,DDB1,HINT1,FASN,GNB2,FGB,YWHAG,F2,RBM14,GNAI2,HNRNPD,TLN1,RAP2B,PKM,CALR,PLEC,ZYX,HADHB,FBN1,DEFA3,LAMP1,HSP90AA1,FGG,LIMS1,EZR,EEF1A1,CAV1,HSPD1,PARK7,SFN,PRDX6,HMGB1,CTS…
GO:0032502	Developmental process	139	5657	2.45713	0.13	0.0024	9606.ENSP00000215832,9606.ENSP00000216181,9606.ENSP00000216714,9606.ENSP00000222219,9606.ENSP00000223136,9606.ENSP00000225275,9606.ENSP00000225655,9606.ENSP00000228740,9606.ENSP00000231751,9606.ENSP00000241052,9606.ENSP00000245907,9606.ENSP00000247970,9606.ENSP00000252699,9606.ENSP00000252999,9606.ENSP00000254722,9606.ENSP00000254810,9606.ENSP00000261772,9606.ENSP00000262418,9606.ENSP00000264908,…	MAPK1,MYH9,APEX1,DNASE2,FIS1,MPO,PFN1,LTA4H,LTF,CAT,C3,PIN1,ACTN4,LAMA5,SERPINF1,H3-3B,AARS1,SLC4A1,ANXA3,PXN,PML,IQGAP1,COPS3,SH3GL1,SOD1,AHSG,GLUD1,FERMT3,LPCAT1,AKR1B1,COL6A3,FABP5,AQP3,PRDX3,HPRT1,VPS35,CKB,DDB1,FASN,EEF2,PDLIM2,HNRNPD,PFAS,CALR,SERPINF2,PLEC,A2M,FBN1,BGN,HSP90AA1,FGG,EZR,CAV1,HSPD1,PPL,SFN,HMGB1,VAPA,CTSB,ANXA2,RPL22,CRKL,ANXA6,SND1,WARS1,PLS3,SPTBN1,HLA-DRB1,MAP4,COL4A2,NCK…
GO:0007275	Multicellular organism development	103	4209	2.44714	0.13	0.0287	9606.ENSP00000215832,9606.ENSP00000216181,9606.ENSP00000222219,9606.ENSP00000225655,9606.ENSP00000228740,9606.ENSP00000231751,9606.ENSP00000241052,9606.ENSP00000245907,9606.ENSP00000247970,9606.ENSP00000252999,9606.ENSP00000254722,9606.ENSP00000254810,9606.ENSP00000261772,9606.ENSP00000262418,9606.ENSP00000264908,9606.ENSP00000268058,9606.ENSP00000268182,9606.ENSP00000268717,9606.ENSP00000269886,…	MAPK1,MYH9,DNASE2,PFN1,LTA4H,LTF,CAT,C3,PIN1,LAMA5,SERPINF1,H3-3B,AARS1,SLC4A1,ANXA3,PML,IQGAP1,COPS3,SH3GL1,SOD1,AHSG,GLUD1,LPCAT1,AKR1B1,PRDX3,HPRT1,VPS35,CKB,FASN,EEF2,PDLIM2,HNRNPD,CALR,SERPINF2,PLEC,A2M,FBN1,BGN,HSP90AA1,CAV1,HSPD1,HMGB1,VAPA,CTSB,ANXA2,RPL22,CRKL,ANXA6,WARS1,PLS3,SPTBN1,HLA-DRB1,MAP4,COL4A2,NCKAP1,GSTM3,COL6A1,LMNA,S100A6,BAG3,FLNA,TACSTD2,PDLIM1,HSP90AB1,GLO1,PEF1,CLIC4,HS…
GO:0048869	Cellular developmental process	88	3530	2.49292	0.13	0.0421	9606.ENSP00000215832,9606.ENSP00000216181,9606.ENSP00000222219,9606.ENSP00000223136,9606.ENSP00000228740,9606.ENSP00000241052,9606.ENSP00000245907,9606.ENSP00000247970,9606.ENSP00000252699,9606.ENSP00000252999,9606.ENSP00000254810,9606.ENSP00000262418,9606.ENSP00000267257,9606.ENSP00000268058,9606.ENSP00000268182,9606.ENSP00000270142,9606.ENSP00000279227,9606.ENSP00000285930,9606.ENSP00000298510,…	MAPK1,MYH9,DNASE2,FIS1,LTA4H,CAT,C3,PIN1,ACTN4,LAMA5,H3-3B,SLC4A1,PXN,PML,IQGAP1,SOD1,FERMT3,AKR1B1,PRDX3,HPRT1,DDB1,FASN,EEF2,HNRNPD,CALR,PLEC,A2M,HSP90AA1,FGG,EZR,CAV1,PPL,SFN,HMGB1,VAPA,CTSB,ANXA2,RPL22,CRKL,ANXA6,SND1,HLA-DRB1,MAP4,COL4A2,NCKAP1,GSTM3,COL6A1,AFDN,LMNA,S100A6,FLNA,CNN3,HSP90AB1,PGK1,GLO1,PEF1,CLIC4,HSPG2,ANXA1,RRBP1,AKR1C1,DNM2,XRCC5,GRB2,TAGLN,MTPN,AP1G1,G6PD,FOLR1,ACTN1,PSAP…
GO:0032501	Multicellular organismal process	150	6490	2.31125	0.1	0.0159	9606.ENSP00000205948,9606.ENSP00000215832,9606.ENSP00000216181,9606.ENSP00000219150,9606.ENSP00000222219,9606.ENSP00000225275,9606.ENSP00000225655,9606.ENSP00000228740,9606.ENSP00000231751,9606.ENSP00000241052,9606.ENSP00000245907,9606.ENSP00000247970,9606.ENSP00000252999,9606.ENSP00000253496,9606.ENSP00000254722,9606.ENSP00000254810,9606.ENSP00000261772,9606.ENSP00000262418,9606.ENSP00000264690,…	APOH,MAPK1,MYH9,CORO1A,DNASE2,MPO,PFN1,LTA4H,LTF,CAT,C3,PIN1,LAMA5,F12,SERPINF1,H3-3B,AARS1,SLC4A1,KLKB1,ANXA3,AMBP,PXN,PML,IQGAP1,COPS3,SH3GL1,SOD1,AHSG,GLUD1,FERMT3,GPD1L,LPCAT1,AKR1B1,ALB,METAP1,FABP5,AQP3,FOLR2,PRDX3,HPRT1,VPS35,CKB,FASN,FGB,EEF2,F2,PDLIM2,GNAI2,HNRNPD,TLN1,RAP2B,CALR,SERPINF2,PLEC,A2M,FBN1,BGN,HSP90AA1,FGG,EZR,CAV1,HSPD1,PARK7,PPL,SFN,HMGB1,VAPA,CTSB,ANXA2,RPL22,CRKL,ANXA6,S…
GO:0031323	Regulation of cellular metabolic process	131	5681	2.30593	0.1	0.0434	9606.ENSP00000157600,9606.ENSP00000215832,9606.ENSP00000216714,9606.ENSP00000221419,9606.ENSP00000221566,9606.ENSP00000223136,9606.ENSP00000225655,9606.ENSP00000225698,9606.ENSP00000229268,9606.ENSP00000231751,9606.ENSP00000241052,9606.ENSP00000245907,9606.ENSP00000247970,9606.ENSP00000248342,9606.ENSP00000252699,9606.ENSP00000253039,9606.ENSP00000253363,9606.ENSP00000258091,9606.ENSP00000261574,…	LMCD1,MAPK1,APEX1,HNRNPL,SGTA,FIS1,PFN1,C1QBP,USP5,LTF,CAT,C3,PIN1,EIF3K,ACTN4,EIF2S3,RBM39,CCT7,IPO5,ALDH2,AARS1,SLC4A1,DCPS,ANXA3,HPX,PXN,PML,IQGAP1,SOD1,CISD2,RPS3,CCT5,GPD1L,LPCAT1,CCT3,METAP1,FABP5,PRDX3,HPRT1,VPS35,DDB1,PA2G4,DCXR,HINT1,SRP9,PCBP1,YWHAG,EEF2,F2,RBM14,GNAI2,HNRNPD,RAP2B,PKM,CALR,SERPINF2,PLEC,FBN1,EEF1G,HSP90AA1,SF3B1,LIMS1,EZR,EEF1A1,CAV1,NDUFA4,PARK7,SFN,PRDX6,HMGB1,ANXA2,…
GO:0009987	Cellular process	331	14826	2.23256	0.09	1.79e-11	9606.ENSP00000044462,9606.ENSP00000205948,9606.ENSP00000210313,9606.ENSP00000215832,9606.ENSP00000216181,9606.ENSP00000216714,9606.ENSP00000219150,9606.ENSP00000221418,9606.ENSP00000221419,9606.ENSP00000221566,9606.ENSP00000222219,9606.ENSP00000223136,9606.ENSP00000225275,9606.ENSP00000225371,9606.ENSP00000225655,9606.ENSP00000225698,9606.ENSP00000228318,9606.ENSP00000228740,9606.ENSP00000229268,…	PSMA4,APOH,PSMD5,MAPK1,MYH9,APEX1,CORO1A,ECH1,HNRNPL,SGTA,DNASE2,FIS1,MPO,EPX,PFN1,C1QBP,SLC25A3,LTA4H,USP5,LTF,CTSD,CAT,GOT2,C3,DSTN,PIN1,EIF3K,TUBA4A,CNN1,PGLS,ACTN4,LAMA5,EIF2S3,RBM39,SERPINF1,H3-3B,CCT7,DYNC1LI2,NPL,RAB21,IPO5,ALDH2,AARS1,SLC4A1,BLVRB,C9,DCPS,CP,ADD1,ANXA3,AMBP,ANK1,HPX,PXN,PML,IQGAP1,COPS3,PFKL,SH3GL1,SOD1,BCAM,RPS11,TINAGL1,CISD2,GLUD1,RPS3,FERMT3,CCT5,GPD1L,LPCAT1,ACAA2,AK…
GO:0050789	Regulation of biological process	257	11655	2.20506	0.08	0.00014	9606.ENSP00000157600,9606.ENSP00000205948,9606.ENSP00000215832,9606.ENSP00000216181,9606.ENSP00000216714,9606.ENSP00000216802,9606.ENSP00000219150,9606.ENSP00000221419,9606.ENSP00000221566,9606.ENSP00000222219,9606.ENSP00000223136,9606.ENSP00000225275,9606.ENSP00000225371,9606.ENSP00000225655,9606.ENSP00000225698,9606.ENSP00000229268,9606.ENSP00000231751,9606.ENSP00000236671,9606.ENSP00000241052,…	LMCD1,APOH,MAPK1,MYH9,APEX1,PSME2,CORO1A,HNRNPL,SGTA,DNASE2,FIS1,MPO,EPX,PFN1,C1QBP,USP5,LTF,CTSD,CAT,C3,DSTN,PIN1,EIF3K,CNN1,ACTN4,LAMA5,EIF2S3,RBM39,F12,SERPINF1,H3-3B,CCT7,ORM1,RAB21,PEBP1,IPO5,ALDH2,AARS1,SLC4A1,C9,DCPS,KLKB1,ADD1,ANXA3,AMBP,ANK1,HPX,PXN,PML,IQGAP1,COPS3,PFKL,SH3GL1,SOD1,BCAM,AHSG,CISD2,GLUD1,RPS3,FERMT3,CCT5,GPD1L,LPCAT1,ACAA2,AKR1B1,STOM,PGLYRP2,COL6A3,CCT3,ALB,PPBP,METAP1,…
GO:0065007	Biological regulation	269	12385	2.17198	0.07	0.00016	9606.ENSP00000157600,9606.ENSP00000205948,9606.ENSP00000215832,9606.ENSP00000216181,9606.ENSP00000216714,9606.ENSP00000216802,9606.ENSP00000219150,9606.ENSP00000221419,9606.ENSP00000221566,9606.ENSP00000222219,9606.ENSP00000223136,9606.ENSP00000225275,9606.ENSP00000225371,9606.ENSP00000225655,9606.ENSP00000225698,9606.ENSP00000229268,9606.ENSP00000231751,9606.ENSP00000236671,9606.ENSP00000241052,…	LMCD1,APOH,MAPK1,MYH9,APEX1,PSME2,CORO1A,HNRNPL,SGTA,DNASE2,FIS1,MPO,EPX,PFN1,C1QBP,USP5,LTF,CTSD,CAT,C3,DSTN,PIN1,EIF3K,CNN1,ACTN4,LAMA5,EIF2S3,RBM39,F12,SERPINF1,H3-3B,CCT7,ORM1,RAB21,PEBP1,IPO5,ALDH2,AARS1,SLC4A1,COMMD9,C9,DCPS,CP,KLKB1,ADD1,ANXA3,AMBP,ANK1,HPX,PXN,PML,IQGAP1,COPS3,PFKL,SH3GL1,SOD1,BCAM,AHSG,CISD2,GLUD1,RPS3,FERMT3,CCT5,GPD1L,LPCAT1,ACAA2,AKR1B1,STOM,PGLYRP2,COL6A3,CCT3,ALB,PP…
GO:0050794	Regulation of cellular process	237	11025	2.14966	0.07	0.0057	9606.ENSP00000157600,9606.ENSP00000205948,9606.ENSP00000215832,9606.ENSP00000216181,9606.ENSP00000216714,9606.ENSP00000216802,9606.ENSP00000219150,9606.ENSP00000221419,9606.ENSP00000221566,9606.ENSP00000223136,9606.ENSP00000225275,9606.ENSP00000225655,9606.ENSP00000225698,9606.ENSP00000229268,9606.ENSP00000231751,9606.ENSP00000236671,9606.ENSP00000241052,9606.ENSP00000245907,9606.ENSP00000246069,…	LMCD1,APOH,MAPK1,MYH9,APEX1,PSME2,CORO1A,HNRNPL,SGTA,FIS1,MPO,PFN1,C1QBP,USP5,LTF,CTSD,CAT,C3,DSTN,PIN1,EIF3K,CNN1,ACTN4,LAMA5,EIF2S3,RBM39,SERPINF1,H3-3B,CCT7,RAB21,PEBP1,IPO5,ALDH2,AARS1,SLC4A1,DCPS,ADD1,ANXA3,AMBP,ANK1,HPX,PXN,PML,IQGAP1,COPS3,PFKL,SH3GL1,SOD1,BCAM,AHSG,CISD2,GLUD1,RPS3,FERMT3,CCT5,GPD1L,LPCAT1,ACAA2,AKR1B1,STOM,PGLYRP2,CCT3,ALB,PPBP,METAP1,FABP5,AQP3,FOLR2,PRDX3,HPRT1,VPS35,P…
