# Supplementary material for: Active Oxidative Metabolism and Impaired Glyoxalase System Under Increased Intracellular Oxidative Stress in Non-Small Cell Lung Cancer
Source: Research Square preprint supplement (doi:10.21203/rs.3.rs-4535848/v1), 2024-06-19
Supplement: Supplementary file 5 [file e895c86ce3ad52652b2c265d.xlsx]

## Sheet: Tabelle1
Patient	Age	Gender	Cancer type
Patient 1	64	female	NSCLC
Patient 2	77	male	NSCLC
Patient 3	84	female	NSCLC
Patient 4	68	male	NSCLC
Patient 5	69	male	LUAD
Patient 6	79	female	SCC
Patient 7	62	male	SCC
Patient 8	78	female	LUAD
Patient 9	52	male	LUAD
Patient 10	70	male	SCC
Patient 11	60	male	LUAD
Patient 12	61	female	LUAD
Patient 13	75	male	SCC
Patient 14	75	male	LUAD
Patient 15	66	male	SCC
Patient 16	73	male	SCC
Patient 17	63	male	LUAD
Patient 18	66	female	SCC
Patient 19	62	female	LUAD
Patient 20	58	male	LUAD
Patient 21	64	male	SCC
Patient 22	56	male	SCC
Patient 23	64	male	LUAD
Patient 24	45	male	LUAD
Patient 25	54	female	LUAD
Patient 26	65	male	NSCLC
Patient 27	53	female	SCC
Patient 28	77	female	LUAD
Patient 29	67	male	SCC
Patient 30	64	male	LUAD
Patient 31	68	male	SCC
Patient 32	57	female	LC
Patient 33	61	male	LUAD
Patient 34	78	male	SCC
Patient 35	60	male	LUAD
Patient 36	57	male	LUAD
Patient 37	37	male	LUAD
Patient 38	56	female	LUAD
Patient 39	61	female	LUAD
Patient 40	73	female	LUAD
Patient 41	56	male	SCC
Patient 42	59	male	LUAD
Patient 43	70	male	SCC
Patient 44	77	female	LUAD
Patient 45	76	female	LUAD
Patient 46	57	male	SCC
Patient 47	74	male	LUAD
Patient 48	51	male	LUAD
Patient 49	76	male	SCC
Patient 50	60	male	NSCLC
Patient 51	71	male	SCC
Patient 52	65	male	LUAD
Patient 53	66	female	LUAD
Patient 54	75	female	LUAD
Patient 55	60	male	LUAD
Patient 56	69	male	LUAD
Patient 57	55	female	LUAD
Patient 58	64	male	LUAD
Patient 59	57	male	LUAD
Patient 60	76	female	LUAD
Patient 61	63	female	LUAD
Patient 62	79	female	LUAD
Patient 63	76	male	SCC
Patient 64	53	female	LUAD
Patient 65	63	female	LUAD
Patient 66	53	male	NSCLC
Patient 67	62	female	LUAD
Patient 68	68	male	SCC
Patient 69	50	male	LUAD
Patient 70	65	male	SCC
					NSCLC: non-defined non-small cell lung carcinoma; LUAD: lung adenocarcinoma; SCC: squamous cell carcinoma; LC: large cell carcinoma
