# Supplementary material for: Active Oxidative Metabolism and Impaired Glyoxalase System Under Increased Intracellular Oxidative Stress in Non-Small Cell Lung Cancer
Source: Research Square preprint supplement (doi:10.21203/rs.3.rs-4535848/v1), 2024-06-19
Supplement: Supplementary file 6 [file e9f7694a8960b60f0451aa2d.xlsx]

## Sheet: Tabelle1
Significant	negative log FDR corrected p-value	log2 FC Healthy to Tumor	Protein IDs	Majority protein IDs	Protein names	Gene names	GOBP	GOMF	GOCC	Reactome	Peptides	Razor + unique peptides	Unique peptides	Sequence coverage [%]	Unique + razor sequence coverage [%]	Unique sequence coverage [%]	Mol. weight [kDa]	Score	Intensity	MS/MS count	LFQ intensity 10H	LFQ intensity 10T	LFQ intensity 11H	LFQ intensity 11T	LFQ intensity 12H	LFQ intensity 12T	LFQ intensity 13H	LFQ intensity 13T	LFQ intensity 14H	LFQ intensity 14T	LFQ intensity 15H	LFQ intensity 15T	LFQ intensity 16H	LFQ intensity 16T	LFQ intensity 17H	LFQ intensity 17T	LFQ intensity 18H	LFQ intensity 18T	LFQ intensity 19H	LFQ intensity 19T	LFQ intensity 1H	LFQ intensity 1T	LFQ intensity 20H	LFQ intensity 20T	LFQ intensity 21H	LFQ intensity 21T	LFQ intensity 22H	LFQ intensity 22T	LFQ intensity 23H
+	28.6498	6.05034	Q15109	Q15109	Advanced glycosylation end product-specific receptor	AGER	GO:0002376;GO:0006355;GO:0006950;GO:0006952;GO:0006954;GO:0006955;GO:0007165;GO:0007166;GO:0009611;GO:0009889;GO:0009987;GO:0010468;GO:0010556;GO:0016043;GO:0019219;GO:0019222;GO:0030030;GO:0031175;GO:0031323;GO:0031326;GO:0032101;GO:0032103;GO:0040012;GO:0040017;GO:0044093;GO:0045087;GO:0048518;GO:0048520;GO:0048583;GO:0048584;GO:0050789;GO:0050794;GO:0050795;GO:0050896;GO:0050920;GO:0050921;GO:…	GO:0004871;GO:0004872;GO:0004888;GO:0005488;GO:0005515;GO:0038023;GO:0042802;GO:0060089	GO:0005576;GO:0005886;GO:0005887;GO:0016020;GO:0016021;GO:0031224;GO:0031226;GO:0044425;GO:0044459;GO:0044464	REACT_118563;REACT_163773;REACT_21281;REACT_24969;REACT_25195	15	15	15	51.5	51.5	51.5	42.802	323.31	1662100000	544	7.37771	-1.70119	5.24929	2.98954	4.9937	2.89345	5.95034	-3.82217	6.08556	-3.5742	6.30655	-0.595243	-2.19989	-4.44516	5.86836	2.01074	3.28298	-3.67125	4.69499	-1.23719	6.12534	4.25998	5.07039	3.45896	5.70994	-0.815758	5.76891	-5.27445	5.13895
+	26.3892	5.41705	Q9BXM0	Q9BXM0	Periaxin	PRX	GO:0007272;GO:0008366;GO:0009987		GO:0005634;GO:0005737;GO:0005886;GO:0016020;GO:0043226;GO:0043227;GO:0043229;GO:0043231;GO:0044424;GO:0044464		36	36	36	44.3	44.3	44.3	154.9	257.25	294890000	470	2.77388	-5.39856	2.65097	-2.93494	-2.7479	-3.16365	0.293467	-5.96717	0.209967	-1.21967	2.62423	-4.6123	-4.6138	-5.60662	4.37942	-3.74387	3.33093	-6.87868	2.52211	-2.81198	2.60412	-4.61699	-0.178413	-5.19763	3.08265	-7.48672	1.9935	-3.45696	2.67127
+	32.9665	5.08499	A6NMZ7	A6NMZ7	Collagen alpha-6(VI) chain	COL6A6	GO:0007155;GO:0008152;GO:0009987;GO:0016043;GO:0022411;GO:0022610;GO:0022617;GO:0030198;GO:0030574;GO:0032501;GO:0032963;GO:0043062;GO:0043170;GO:0044236;GO:0044243;GO:0044259;GO:0071840;GO:0071841;GO:0071842;GO:0071845		GO:0005576;GO:0005578;GO:0005581;GO:0031012;GO:0044420;GO:0044421	REACT_121139;REACT_13552;REACT_150180;REACT_150401;REACT_163906;REACT_16888;REACT_18312	70	70	69	40.8	40.8	40.7	247.17	323.31	1368200000	2205	3.67022	-0.798826	4.06466	-0.127609	4.76245	0.91761	5.00661	-2.50816	3.98746	-2.13717	4.60414	-1.45432	2.2944	-2.11551	5.43946	3.53466	4.85642	-2.47218	5.61546	0.0557795	3.61868	-0.573778	4.33543	1.6355	3.76223	-2.11832	3.97538	-1.78	4.77993
+	25.7523	4.8303	P22748	P22748	Carbonic anhydrase 4	CA4	GO:0006730;GO:0006810;GO:0006811;GO:0006820;GO:0008152;GO:0009719;GO:0009725;GO:0009987;GO:0010033;GO:0015698;GO:0015701;GO:0015711;GO:0032502;GO:0042221;GO:0042493;GO:0044237;GO:0044281;GO:0048513;GO:0048545;GO:0048856;GO:0050896;GO:0051234	GO:0003824;GO:0004089;GO:0005488;GO:0008270;GO:0016829;GO:0016835;GO:0016836;GO:0043167;GO:0043169;GO:0046872;GO:0046914	GO:0005783;GO:0005791;GO:0005793;GO:0005794;GO:0005802;GO:0005886;GO:0009986;GO:0012506;GO:0016020;GO:0016324;GO:0016529;GO:0030658;GO:0030659;GO:0030667;GO:0031090;GO:0031224;GO:0031225;GO:0031226;GO:0031233;GO:0031253;GO:0031362;GO:0031526;GO:0031982;GO:0031988;GO:0042383;GO:0043226;GO:0043227;GO:0043229;GO:0043230;GO:0043231;GO:0044421;GO:0044422;GO:0044424;GO:0044425;GO:0044431;GO:0044433;GO:…	REACT_121123;REACT_121329;REACT_121380	13	13	13	48.1	48.1	48.1	35.032	252.92	156870000	408	3.23842	-3.72565	2.89643	-0.920546	-1.40885	-2.97769	0.797049	-4.88033	1.06012	-5.33166	0.430674	-3.09217	-2.67896	-3.75746	1.22143	-2.9396	0.916561	-5.14606	2.76244	-2.15421	1.31977	-3.09149	-0.321733	-4.17975	3.99846	-3.52647	2.54333	-5.24325	1.74338
+	27.091	4.66095	Q9NZA1	Q9NZA1	Chloride intracellular channel protein 5	CLIC5	GO:0002024;GO:0003008;GO:0006810;GO:0006811;GO:0006820;GO:0006821;GO:0007565;GO:0007600;GO:0007605;GO:0008104;GO:0009893;GO:0009987;GO:0015698;GO:0016043;GO:0019222;GO:0022414;GO:0030030;GO:0032501;GO:0033036;GO:0044246;GO:0044253;GO:0048518;GO:0050789;GO:0050877;GO:0050885;GO:0050905;GO:0050954;GO:0051179;GO:0051234;GO:0051239;GO:0051240;GO:0051704;GO:0060088;GO:0060122;GO:0065007;GO:0071840;GO:…	GO:0005215;GO:0005216;GO:0005244;GO:0005253;GO:0005254;GO:0008509;GO:0015075;GO:0015267;GO:0022803;GO:0022832;GO:0022836;GO:0022838;GO:0022857;GO:0022891;GO:0022892	GO:0005794;GO:0005815;GO:0005856;GO:0005902;GO:0005938;GO:0015629;GO:0031982;GO:0031988;GO:0032420;GO:0032991;GO:0034702;GO:0034707;GO:0042995;GO:0043226;GO:0043227;GO:0043228;GO:0043229;GO:0043230;GO:0043231;GO:0043232;GO:0043234;GO:0044421;GO:0044422;GO:0044424;GO:0044425;GO:0044430;GO:0044444;GO:0044446;GO:0044464;GO:0065010;GO:0070062		16	13	13	39.5	33.2	33.2	46.502	260.38	211570000	392	4.05941	-4.13681	2.99214	0.715895	2.34852	1.82436	2.64637	-6.45026	1.82273	-3.4219	3.25499	-3.29414	-2.8786	-6.61228	2.2044	-2.58533	-0.73937	-4.77518	0.710663	-4.23945	3.52424	-2.5277	1.9966	-1.09169	2.57341	-5.49169	0.946729	-5.27819	2.62327
+	16.2253	4.08547	P15090	P15090	Fatty acid-binding protein, adipocyte	FABP4	GO:0001816;GO:0001932;GO:0006355;GO:0006469;GO:0006629;GO:0006638;GO:0006639;GO:0006641;GO:0006662;GO:0008152;GO:0009056;GO:0009889;GO:0009890;GO:0009892;GO:0009987;GO:0010035;GO:0010038;GO:0010226;GO:0010468;GO:0010556;GO:0010558;GO:0010605;GO:0010629;GO:0016042;GO:0018904;GO:0019219;GO:0019220;GO:0019222;GO:0019433;GO:0030154;GO:0031323;GO:0031324;GO:0031326;GO:0031327;GO:0031347;GO:0031349;GO:…	GO:0005215;GO:0005488;GO:0005504;GO:0008289;GO:0031406;GO:0033293	GO:0005634;GO:0005737;GO:0005811;GO:0005829;GO:0031982;GO:0031988;GO:0043226;GO:0043227;GO:0043229;GO:0043230;GO:0043231;GO:0044421;GO:0044424;GO:0044444;GO:0044464;GO:0065010;GO:0070062	REACT_27161;REACT_494	14	14	12	72.7	72.7	72.7	14.719	323.31	307800000	463	2.05103	-2.31427	2.28571	-3.62335	2.44171	-0.725143	3.33905	-5.07293	2.07526	-4.55324	2.44667	-2.57733	-0.442675	4.81716	2.55054	1.70082	1.20576	-6.73491	2.58673	0.803752	2.17479	1.07302	0.997545	0.165317	2.88896	-6.12701	2.46	-4.97064	0.756237
+	33.7006	4.07576	Q96MM6	Q96MM6	Heat shock 70 kDa protein 12B	HSPA12B		GO:0000166;GO:0005488;GO:0005524;GO:0017076;GO:0030554;GO:0032553;GO:0032555;GO:0032559;GO:0035639		REACT_264487	31	31	29	56.9	56.9	52	75.687	306.1	129830000	425	1.07357	-2.85488	1.08064	-3.62388	-0.00105667	-3.58638	-1.88347	-5.00323	-1.26124	-5.21801	1.06994	-4.15817	-3.22953	-5.17082	1.99956	-2.81024	1.08877	-5.12799	1.52834	-2.91519	-1.90964	-4.64122	-2.10263	-4.47228	0.816108	-6.1522	0.460755	-3.19272	1.003
+	29.8766	3.98384	Q6UWY5	Q6UWY5	Olfactomedin-like protein 1	OLFML1			GO:0005576		12	12	12	43	43	43	45.95	134.97	93059000	291	0.698384	-4.29702	1.35493	-2.95295	1.34816	-2.67566	1.30589	-3.07529	1.49891	-4.80341	1.48151	-3.06587	-2.31605	-4.57613	0.630234	-2.46941	-1.12923	-6.23716	0.953032	-2.32923	1.10243	-4.11404	-0.038969	-2.04536	-0.76896	-6.03542	-2.36868	-3.95791	0.519548
+	20.6963	3.94065	P07451	P07451	Carbonic anhydrase 3	CA3	GO:0006730;GO:0006810;GO:0006811;GO:0006820;GO:0006950;GO:0006979;GO:0008152;GO:0009987;GO:0010033;GO:0015698;GO:0015701;GO:0015711;GO:0042221;GO:0044237;GO:0044281;GO:0045471;GO:0050896;GO:0051234	GO:0003824;GO:0004089;GO:0005488;GO:0008270;GO:0016151;GO:0016829;GO:0016835;GO:0016836;GO:0043167;GO:0043169;GO:0046872;GO:0046914	GO:0005829;GO:0044424;GO:0044444;GO:0044464	REACT_121123	13	13	12	77.7	77.7	68.5	29.557	323.31	349060000	805	1.47102	-0.39279	1.66554	-4.5323	2.90519	0.359001	4.48546	-2.57792	1.87192	-2.30891	2.21555	-0.332027	-1.50075	-4.60166	1.43636	-2.51074	0.977203	-4.11329	2.09486	2.63116	0.859694	-5.12107	2.01014	2.2877	1.04873	-6.86732	1.76914	-2.02292	1.92879
+	16.989	3.88481	P06732	P06732	Creatine kinase M-type;Creatine kinase M-type, N-terminally processed	CKM	GO:0006082;GO:0006520;GO:0006575;GO:0006599;GO:0006600;GO:0006603;GO:0006807;GO:0008152;GO:0008652;GO:0009058;GO:0009308;GO:0009309;GO:0009987;GO:0016053;GO:0019752;GO:0034641;GO:0042180;GO:0042396;GO:0042398;GO:0043436;GO:0044106;GO:0044237;GO:0044238;GO:0044249;GO:0044271;GO:0044281;GO:0044283;GO:0046314;GO:0046394	GO:0000166;GO:0003824;GO:0004111;GO:0005488;GO:0005524;GO:0016301;GO:0016740;GO:0016772;GO:0016775;GO:0017076;GO:0030554;GO:0032553;GO:0032555;GO:0032559;GO:0035639	GO:0005829;GO:0044424;GO:0044444;GO:0044464	REACT_813	19	19	19	45.1	45.1	45.1	43.101	323.31	274230000	207	1.01634	-1.55735	3.38006	-4.20056	5.22421	-0.989326	6.32384	-2.66611	-0.0648232	-2.67986	4.55645	-1.99506	-3.27411	-5.49884	1.98356	-3.90133	-1.41804	-4.62076	0.00616646	0.108905	1.13802	0.129637	-0.0855923	-0.404267	-1.53951	-5.51129	-0.732339	-1.71891	3.053
+	17.0731	3.81214	P21695	P21695	Glycerol-3-phosphate dehydrogenase [NAD(+)], cytoplasmic	GPD1	GO:0005975;GO:0005996;GO:0006006;GO:0006066;GO:0006071;GO:0006072;GO:0006082;GO:0006094;GO:0006109;GO:0006110;GO:0006116;GO:0006127;GO:0006139;GO:0006629;GO:0006638;GO:0006639;GO:0006641;GO:0006644;GO:0006650;GO:0006654;GO:0006662;GO:0006732;GO:0006733;GO:0006734;GO:0006753;GO:0006793;GO:0006796;GO:0006807;GO:0006810;GO:0006839;GO:0008152;GO:0008610;GO:0008654;GO:0009056;GO:0009058;GO:0009117;GO:…	GO:0000166;GO:0003824;GO:0004367;GO:0004368;GO:0005488;GO:0016491;GO:0016614;GO:0016616;GO:0016901;GO:0048037;GO:0050662;GO:0051287	GO:0005739;GO:0005829;GO:0009331;GO:0031982;GO:0031988;GO:0032991;GO:0043226;GO:0043227;GO:0043229;GO:0043230;GO:0043231;GO:0043234;GO:0044421;GO:0044424;GO:0044444;GO:0044464;GO:0065010;GO:0070062	REACT_1190;REACT_120906	17	17	12	66.2	66.2	46.1	37.567	269.04	167450000	504	0.943273	-3.26456	0.462626	-3.35107	-1.12561	-2.34298	1.80727	-6.4396	1.13932	-5.42842	1.12872	-4.9591	-4.8194	-6.81015	-1.31682	-1.1656	2.04109	-7.53709	1.17387	-2.13648	1.51551	1.15001	2.4266	0.935905	2.88096	-6.10602	2.12599	-4.10418	-1.74252
+	25.6614	3.80885	Q13642	Q13642	Four and a half LIM domains protein 1	FHL1	GO:0001558;GO:0003254;GO:0007346;GO:0007517;GO:0009653;GO:0009887;GO:0009987;GO:0010389;GO:0010564;GO:0010948;GO:0010959;GO:0010972;GO:0030154;GO:0030308;GO:0032502;GO:0032844;GO:0032879;GO:0040008;GO:0043266;GO:0043268;GO:0043269;GO:0043270;GO:0045786;GO:0045926;GO:0045930;GO:0048513;GO:0048518;GO:0048519;GO:0048523;GO:0048856;GO:0048869;GO:0050789;GO:0050794;GO:0051049;GO:0051050;GO:0051128;GO:…	GO:0005488;GO:0005515;GO:0008270;GO:0043167;GO:0043169;GO:0044325;GO:0046872;GO:0046914	GO:0005634;GO:0005737;GO:0005829;GO:0005886;GO:0005912;GO:0005924;GO:0005925;GO:0016020;GO:0030054;GO:0030055;GO:0043226;GO:0043227;GO:0043229;GO:0043231;GO:0044424;GO:0044444;GO:0044464;GO:0070161		11	11	10	38.4	38.4	30.3	36.263	89.45	489000000	499	2.76369	-0.356613	2.55968	-2.24505	2.76834	-1.82036	2.60783	-3.41812	3.19238	-4.55684	3.53399	-3.51923	-1.60771	-1.06774	3.85597	1.39417	3.06203	-3.31266	3.40755	-0.0574884	2.26233	-3.88815	3.23772	2.49813	3.02452	-2.37155	-0.618653	-2.07169	3.44048
+	31.8754	3.80526	O95810	O95810	Serum deprivation-response protein	SDPR		GO:0001786;GO:0005080;GO:0005488;GO:0005515;GO:0005543;GO:0008289;GO:0019899;GO:0019900;GO:0019901	GO:0005737;GO:0005829;GO:0005901;GO:0044424;GO:0044425;GO:0044444;GO:0044459;GO:0044464;GO:0045121		19	19	19	50.1	50.1	50.1	47.173	323.31	1192200000	1305	4.95604	-0.717733	3.78979	2.70542	3.42584	1.6851	4.12741	0.995429	4.24711	-1.09663	4.30481	-0.856337	-0.169538	-2.34832	4.67293	1.52419	3.85702	-2.95857	4.03653	0.479053	5.1277	2.07326	3.63436	2.46401	4.39535	1.4303	4.17658	-2.07755	4.41511
+	27.7954	3.74911	P00325	P00325	Alcohol dehydrogenase 1B	ADH1B	GO:0006066;GO:0006067;GO:0006069;GO:0006805;GO:0008152;GO:0009987;GO:0034308;GO:0044237;GO:0044281;GO:0055114	GO:0003824;GO:0004022;GO:0004024;GO:0005488;GO:0008270;GO:0016491;GO:0016614;GO:0016616;GO:0043167;GO:0043169;GO:0046872;GO:0046914	GO:0005829;GO:0044424;GO:0044444;GO:0044464	REACT_34	27	27	7	62.7	62.7	25.1	39.835	323.31	3001300000	1786	4.28016	-0.888277	4.01594	-0.169382	4.75082	2.01177	4.56939	-2.48507	4.73413	-3.49447	4.88681	-0.33165	2.17731	-2.63608	5.31294	2.82147	4.7641	-0.507706	5.43765	1.35001	4.84149	1.06736	5.0841	4.34104	5.13435	-0.777853	4.75993	-2.16876	5.41548
+	25.8975	3.63124	P22105	P22105	Tenascin-X	TNXB	GO:0001932;GO:0006082;GO:0006629;GO:0006631;GO:0006638;GO:0006639;GO:0006641;GO:0006662;GO:0006996;GO:0007010;GO:0007155;GO:0007160;GO:0008152;GO:0009966;GO:0009987;GO:0010627;GO:0016043;GO:0016337;GO:0018904;GO:0019220;GO:0019222;GO:0019752;GO:0022607;GO:0022610;GO:0023051;GO:0030029;GO:0030036;GO:0030198;GO:0030199;GO:0031323;GO:0031399;GO:0031589;GO:0032268;GO:0032501;GO:0032787;GO:0032963;GO:…	GO:0001871;GO:0005102;GO:0005178;GO:0005488;GO:0005515;GO:0005539;GO:0008201;GO:0030246;GO:0030247;GO:0032403	GO:0005578;GO:0005615;GO:0005622;GO:0031012;GO:0031982;GO:0031988;GO:0043226;GO:0043227;GO:0043230;GO:0044421;GO:0044464;GO:0065010;GO:0070062	REACT_163906	99	99	86	38.9	38.9	34.3	458.38	323.31	1005800000	2006	3.80043	-0.815529	4.37173	1.92201	4.87279	3.52077	4.43858	-2.36846	4.02246	-1.66651	4.11109	0.146435	1.85782	-2.12056	3.64929	1.38951	2.83911	-2.30543	3.37879	-1.12959	4.01604	0.812508	2.81638	1.10454	2.53882	-3.66518	1.91032	-1.98652	4.11778
+	23.4639	3.45957	P33151	P33151	Cadherin-5	CDH5	GO:0001955;GO:0007155;GO:0007156;GO:0007165;GO:0007166;GO:0007167;GO:0007169;GO:0008285;GO:0009987;GO:0010033;GO:0016043;GO:0016337;GO:0021700;GO:0022607;GO:0022610;GO:0032502;GO:0032878;GO:0034329;GO:0034330;GO:0034332;GO:0035924;GO:0042127;GO:0042221;GO:0045216;GO:0048010;GO:0048519;GO:0048523;GO:0050789;GO:0050794;GO:0050896;GO:0051716;GO:0065007;GO:0070848;GO:0070887;GO:0071310;GO:0071363;GO:…	GO:0005102;GO:0005488;GO:0005509;GO:0005515;GO:0008013;GO:0043167;GO:0043169;GO:0044325;GO:0046872	GO:0005886;GO:0005911;GO:0005912;GO:0005923;GO:0016020;GO:0016021;GO:0030054;GO:0031224;GO:0044425;GO:0044464;GO:0070160;GO:0070161	REACT_19195;REACT_263991	15	15	15	25.8	25.8	25.8	87.527	70.737	87206000	214	1.2995	-4.07202	1.40466	-3.74178	-1.74834	-3.26429	-1.60577	-4.99713	0.575468	-3.80981	1.43997	-3.92482	-3.58669	-4.32333	2.08505	-1.77814	1.68392	-4.17776	1.79116	-2.21907	-0.0231152	-3.02421	0.350042	-3.37357	1.1505	-5.73914	0.208079	-6.34415	1.23432
+	16.4652	3.38838	Q8NFJ5	Q8NFJ5	Retinoic acid-induced protein 3	GPRC5A	GO:0007165;GO:0009987;GO:0050789;GO:0050794;GO:0050896;GO:0051716;GO:0065007	GO:0004871;GO:0004872;GO:0004888;GO:0004930;GO:0038023;GO:0060089	GO:0005886;GO:0005887;GO:0012506;GO:0016020;GO:0016021;GO:0030659;GO:0031090;GO:0031224;GO:0031226;GO:0031982;GO:0031988;GO:0043226;GO:0043227;GO:0043229;GO:0043230;GO:0043231;GO:0044421;GO:0044422;GO:0044424;GO:0044425;GO:0044433;GO:0044444;GO:0044446;GO:0044459;GO:0044464;GO:0065010;GO:0070062		7	7	7	31.4	31.4	31.4	40.251	119.49	207790000	182	4.33495	-2.64775	2.96297	0.864531	1.18149	-1.40775	2.63817	-5.69856	3.3458	-4.48329	3.00769	-2.99158	-0.647873	-3.6121	3.33471	-1.44882	2.19525	-2.74409	2.42934	0.984996	3.19175	-1.03823	3.23589	0.177955	2.90288	-4.16414	0.485156	-3.12208	3.56526
+	35.7181	3.36526	Q6NZI2	Q6NZI2	Polymerase I and transcript release factor	PTRF	GO:0006139;GO:0006351;GO:0006352;GO:0006353;GO:0006355;GO:0006360;GO:0006361;GO:0006363;GO:0006807;GO:0008152;GO:0009058;GO:0009059;GO:0009889;GO:0009987;GO:0010467;GO:0010468;GO:0010556;GO:0016070;GO:0019219;GO:0019222;GO:0031323;GO:0031326;GO:0032774;GO:0034641;GO:0034645;GO:0043170;GO:0044237;GO:0044238;GO:0044249;GO:0044260;GO:0050789;GO:0050794;GO:0051171;GO:0051252;GO:0060255;GO:0065007;GO:…	GO:0003676;GO:0003723;GO:0005488;GO:0019843;GO:0042134	GO:0005634;GO:0005654;GO:0005737;GO:0005739;GO:0005783;GO:0005829;GO:0005886;GO:0005901;GO:0016020;GO:0032991;GO:0043226;GO:0043227;GO:0043229;GO:0043231;GO:0043234;GO:0044422;GO:0044424;GO:0044425;GO:0044428;GO:0044444;GO:0044446;GO:0044459;GO:0044464;GO:0045121	REACT_1074	23	23	23	53.6	53.6	53.6	43.476	323.31	2826700000	1644	6.2725	-0.549782	5.23081	1.46748	4.88561	3.18482	5.00777	1.78964	5.73068	0.177453	5.85356	2.31361	2.5487	1.86624	6.08261	3.72415	5.35448	1.00785	5.86271	1.54565	6.29623	2.99288	5.15419	3.43481	5.70404	-0.276064	5.26682	-0.13257	5.83728
+	18.5688	3.35034	P17661	P17661	Desmin	DES	GO:0003008;GO:0003012;GO:0006928;GO:0006936;GO:0006996;GO:0007010;GO:0008016;GO:0009987;GO:0016043;GO:0030029;GO:0030048;GO:0030049;GO:0032501;GO:0033275;GO:0044057;GO:0050789;GO:0051239;GO:0065007;GO:0070252;GO:0071840;GO:0071841;GO:0071842	GO:0005198;GO:0005200;GO:0005488;GO:0005515;GO:0008092;GO:0042802	GO:0005829;GO:0005882;GO:0005886;GO:0005911;GO:0005912;GO:0005913;GO:0005916;GO:0016020;GO:0030018;GO:0030054;GO:0031594;GO:0031982;GO:0031988;GO:0032991;GO:0042383;GO:0043226;GO:0043227;GO:0043230;GO:0043234;GO:0044421;GO:0044422;GO:0044424;GO:0044430;GO:0044444;GO:0044446;GO:0044449;GO:0044464;GO:0045202;GO:0065010;GO:0070062;GO:0070161	REACT_16969	46	40	40	76	71.7	71.7	53.535	323.31	1085300000	1145	2.7629	-1.73701	4.03273	-1.35703	3.7145	2.31485	2.86659	-2.49787	4.10457	-2.19541	4.15087	0.446714	1.47351	-2.28347	3.64732	0.963341	3.74024	-2.16243	3.67683	-1.51045	2.29425	-0.669081	5.18236	-2.34499	4.3962	-0.936844	-0.665151	-2.77271	2.32993
+	18.4711	3.28287	Q8IWL1	Q8IWL1	Pulmonary surfactant-associated protein A2	SFTPA2	GO:0007585;GO:0032501	GO:0005488;GO:0030246	GO:0005576;GO:0005578;GO:0005581;GO:0005615;GO:0031012;GO:0044420;GO:0044421	REACT_23916;REACT_6894;REACT_8005	15	15	1	58.1	58.1	10.9	26.169	323.31	3258900000	1131	6.2863	3.30308	5.89022	5.06931	6.5631	3.15427	6.76565	1.64403	5.66915	1.19555	5.52852	-0.459003	4.54168	-3.48655	4.98894	2.89841	5.1691	0.145554	5.23514	3.20301	5.38281	5.70388	4.71892	3.40157	4.75606	-2.11294	5.40313	-1.16473	5.15407
+	19.8492	3.27933	Q99758	Q99758	ATP-binding cassette sub-family A member 3	ABCA3	GO:0006810;GO:0006869;GO:0009987;GO:0042221;GO:0042493;GO:0050896;GO:0051234;GO:0055085;GO:0071702	GO:0000166;GO:0003824;GO:0005215;GO:0005488;GO:0005524;GO:0015399;GO:0015405;GO:0016462;GO:0016787;GO:0016817;GO:0016818;GO:0016820;GO:0016887;GO:0017076;GO:0017111;GO:0022804;GO:0022857;GO:0030554;GO:0032553;GO:0032555;GO:0032559;GO:0035639;GO:0042623;GO:0042626;GO:0043492	GO:0005615;GO:0005886;GO:0016020;GO:0016021;GO:0031224;GO:0044421;GO:0044425;GO:0044464	REACT_111158	39	39	36	36.2	36.2	32.7	191.36	323.31	386480000	1009	2.48322	-2.16216	2.42068	1.92853	1.44256	1.05806	1.80544	-3.67517	1.5271	-5.02008	2.65584	-2.91033	2.61913	-4.3928	2.09069	1.3589	2.46114	-2.77172	2.15773	-1.60191	2.81226	0.457474	1.94294	2.18164	1.76136	-4.45966	2.47495	-2.68163	1.73656
+	35.6517	3.25831	Q03135;P56539	Q03135	Caveolin-1	CAV1	GO:0000122;GO:0000165;GO:0000188;GO:0001525;GO:0001570;GO:0001666;GO:0001765;GO:0001932;GO:0001933;GO:0001934;GO:0001936;GO:0001937;GO:0001959;GO:0001960;GO:0002026;GO:0002376;GO:0002682;GO:0002684;GO:0002694;GO:0002696;GO:0003008;GO:0003013;GO:0003018;GO:0003057;GO:0006355;GO:0006357;GO:0006461;GO:0006469;GO:0006629;GO:0006638;GO:0006639;GO:0006641;GO:0006662;GO:0006807;GO:0006810;GO:0006811;GO:…	GO:0005102;GO:0005113;GO:0005198;GO:0005488;GO:0005496;GO:0005515;GO:0008047;GO:0008200;GO:0008289;GO:0015459;GO:0015485;GO:0016247;GO:0016248;GO:0016504;GO:0019870;GO:0019899;GO:0019900;GO:0019901;GO:0030234;GO:0032934;GO:0032947;GO:0042802;GO:0044325;GO:0050998;GO:0061134;GO:0070320	GO:0000139;GO:0002080;GO:0005622;GO:0005768;GO:0005783;GO:0005811;GO:0005886;GO:0005887;GO:0005901;GO:0005912;GO:0005924;GO:0005925;GO:0005929;GO:0005938;GO:0010008;GO:0012506;GO:0016020;GO:0016021;GO:0016323;GO:0016324;GO:0030054;GO:0030055;GO:0030659;GO:0030666;GO:0030667;GO:0031090;GO:0031224;GO:0031226;GO:0031410;GO:0031901;GO:0031982;GO:0032991;GO:0042995;GO:0043226;GO:0043227;GO:0043229;GO:…	REACT_12477;REACT_12541;REACT_12560;REACT_263991;REACT_264034;REACT_494	11	11	11	68	68	68	20.471	323.31	1869200000	1058	6.40806	0.969839	5.54926	4.19586	5.13143	3.161	5.15837	2.15572	5.40934	0.723384	5.85759	1.97012	2.38679	1.23723	5.43475	3.43197	4.95039	0.399424	5.34285	1.21834	5.97107	3.58821	4.69588	2.85883	5.66994	0.0152531	5.15621	0.220791	5.38508
+	20.3014	3.25489	Q6NY19	Q6NY19	KN motif and ankyrin repeat domain-containing protein 3	KANK3					17	17	16	30.1	30.1	29.1	85.892	121.23	107230000	186	2.14248	-0.784336	1.28029	0.39616	0.445457	-1.03805	0.943342	-0.193147	-0.105488	-5.10579	2.71173	-3.43669	-1.53218	-2.11759	1.74891	-0.784792	0.595465	-5.93978	2.60213	-2.98274	1.83018	-1.12749	1.64506	-1.64181	1.90087	-3.81774	2.002	-4.59279	0.880535
+	36.8113	3.2499	Q9NZN4	Q9NZN4	EH domain-containing protein 2	EHD2	GO:0006810;GO:0006897;GO:0006996;GO:0007009;GO:0007010;GO:0007596;GO:0007599;GO:0008104;GO:0009987;GO:0010324;GO:0016043;GO:0016044;GO:0016192;GO:0016197;GO:0030029;GO:0030036;GO:0030865;GO:0030866;GO:0032456;GO:0032501;GO:0033036;GO:0034613;GO:0046907;GO:0050817;GO:0050878;GO:0051179;GO:0051234;GO:0051641;GO:0051649;GO:0061024;GO:0065007;GO:0065008;GO:0070727;GO:0071840;GO:0071841;GO:0071842;GO:…	GO:0000166;GO:0003676;GO:0003824;GO:0005488;GO:0005509;GO:0005524;GO:0005525;GO:0016787;GO:0017076;GO:0019001;GO:0030554;GO:0032553;GO:0032555;GO:0032559;GO:0032561;GO:0035639;GO:0043167;GO:0043169;GO:0046872	GO:0005634;GO:0005886;GO:0005901;GO:0010008;GO:0016020;GO:0031090;GO:0031982;GO:0031988;GO:0043226;GO:0043227;GO:0043229;GO:0043230;GO:0043231;GO:0044421;GO:0044422;GO:0044424;GO:0044425;GO:0044440;GO:0044444;GO:0044446;GO:0044459;GO:0044464;GO:0045121;GO:0048471;GO:0055038;GO:0065010;GO:0070062	REACT_24970	37	36	33	79.9	79.9	75.9	61.161	323.31	2436800000	2253	4.15907	-0.19038	3.63829	-0.960608	3.41359	0.934093	3.45952	-0.842429	3.3768	-1.80474	3.72262	-0.336876	0.794954	-0.116001	4.68606	2.15443	3.64768	-0.133694	4.4452	0.803838	3.41692	0.295368	3.73546	2.3245	4.61782	-1.68151	4.17732	-0.706678	4.27791
+	20.5763	3.20678	P08473	P08473	Neprilysin	MME	GO:0001822;GO:0002003;GO:0003008;GO:0006082;GO:0006508;GO:0006518;GO:0006520;GO:0006575;GO:0006599;GO:0006807;GO:0006950;GO:0007568;GO:0007569;GO:0007600;GO:0008152;GO:0009100;GO:0009308;GO:0009314;GO:0009411;GO:0009416;GO:0009628;GO:0009987;GO:0010033;GO:0010224;GO:0010817;GO:0016485;GO:0016486;GO:0019233;GO:0019538;GO:0019752;GO:0032501;GO:0032502;GO:0033554;GO:0034097;GO:0034641;GO:0034644;GO:…	GO:0003824;GO:0004175;GO:0004222;GO:0005488;GO:0008233;GO:0008237;GO:0008238;GO:0008270;GO:0016787;GO:0042277;GO:0043167;GO:0043169;GO:0046872;GO:0046914;GO:0070011	GO:0005737;GO:0005886;GO:0005887;GO:0005903;GO:0005912;GO:0005924;GO:0005925;GO:0008021;GO:0016020;GO:0016021;GO:0016023;GO:0030054;GO:0030055;GO:0030135;GO:0030136;GO:0030424;GO:0030425;GO:0031224;GO:0031226;GO:0031410;GO:0031982;GO:0031988;GO:0042995;GO:0043005;GO:0043226;GO:0043227;GO:0043229;GO:0043230;GO:0043231;GO:0044306;GO:0044421;GO:0044424;GO:0044425;GO:0044444;GO:0044456;GO:0044459;GO:…	REACT_147707	26	26	25	40.7	40.7	39.3	85.513	213.23	140840000	352	2.75289	-0.917521	1.6898	-2.12305	-0.992191	-4.75282	0.606459	-2.36766	1.0364	-3.38268	1.66854	-2.06386	-0.589809	-2.80497	1.16076	-2.77714	-2.16453	0.812716	0.704218	-1.75941	-0.884918	-3.02331	1.24549	1.24612	2.43812	-5.92479	0.483439	-3.7109	-2.05531
+	15.4797	3.18505	A8TX70	A8TX70	Collagen alpha-5(VI) chain	COL6A5	GO:0007155;GO:0008152;GO:0009987;GO:0016043;GO:0022411;GO:0022610;GO:0022617;GO:0030198;GO:0030574;GO:0032501;GO:0032963;GO:0043062;GO:0043170;GO:0044236;GO:0044243;GO:0044259;GO:0071840;GO:0071841;GO:0071842;GO:0071845		GO:0005576;GO:0005578;GO:0005581;GO:0031012;GO:0044420;GO:0044421	REACT_121139;REACT_13552;REACT_150180;REACT_150401;REACT_163906;REACT_16888;REACT_18312	33	33	33	16.2	16.2	16.2	289.92	153.66	539440000	257	1.62675	2.44178	6.43712	3.54018	3.42034	2.20705	1.16422	0.344972	0.15797	-1.61574	5.77654	-1.59057	0.565878	-0.913391	5.45921	1.83937	3.44674	-0.381586	6.46184	6.39642	6.14652	4.19682	3.55447	0.385764	1.80893	0.119907	1.34779	0.798409	2.77831
+	16.4662	3.15981	Q9BW30	Q9BW30	Tubulin polymerization-promoting protein family member 3	TPPP3	GO:0000226;GO:0001578;GO:0006996;GO:0007010;GO:0007017;GO:0009987;GO:0016043;GO:0071840;GO:0071841;GO:0071842	GO:0005488;GO:0005515;GO:0008092;GO:0015631	GO:0005737;GO:0005874;GO:0031982;GO:0031988;GO:0032991;GO:0043226;GO:0043227;GO:0043230;GO:0043234;GO:0044421;GO:0044422;GO:0044424;GO:0044430;GO:0044446;GO:0044464;GO:0065010;GO:0070062		11	11	11	55.1	55.1	55.1	18.985	83.911	352380000	349	3.8739	-0.625923	3.28559	0.311321	3.25835	1.41574	2.9965	-2.4879	4.5029	-2.56796	3.55807	-2.71136	0.0592213	0.963856	3.37762	-1.98354	0.61853	-2.75356	1.74472	-1.11726	2.81095	-4.19218	3.36454	-1.82507	3.07433	-3.50708	1.0541	-3.56051	3.24372
+	17.2233	3.13424	Q9UQV4	Q9UQV4	Lysosome-associated membrane glycoprotein 3	LAMP3	GO:0002376;GO:0008283		GO:0005765;GO:0005774;GO:0016020;GO:0016021;GO:0031090;GO:0031224;GO:0044422;GO:0044424;GO:0044425;GO:0044437;GO:0044444;GO:0044446;GO:0044464		4	4	4	12	12	12	44.346	82.448	71774000	270	1.96474	-1.76227	1.63782	-1.34594	1.21164	-2.68082	1.249	-3.94626	1.12271	-5.25013	0.620394	-5.12506	0.499538	-4.98793	0.320827	-0.149248	0.220715	-4.27786	0.666079	-1.771	1.58118	0.0240307	0.718168	0.693583	0.775489	-5.2452	1.56373	-6.0258	1.04325
+	20.9816	3.12237	Q96AP7	Q96AP7	Endothelial cell-selective adhesion molecule	ESAM	GO:0002376;GO:0006928;GO:0007155;GO:0007156;GO:0007596;GO:0007599;GO:0009987;GO:0016337;GO:0016477;GO:0022610;GO:0032501;GO:0040011;GO:0048870;GO:0050817;GO:0050878;GO:0050900;GO:0065007;GO:0065008		GO:0005886;GO:0005911;GO:0005912;GO:0005923;GO:0016020;GO:0016021;GO:0030054;GO:0031224;GO:0031982;GO:0031988;GO:0043226;GO:0043227;GO:0043230;GO:0044421;GO:0044425;GO:0044464;GO:0065010;GO:0070062;GO:0070160;GO:0070161	REACT_12051	5	5	5	21.8	21.8	21.8	41.176	109.04	138410000	196	3.94553	-3.62493	1.67337	2.40042	1.85475	-0.308163	1.78413	-1.38359	0.678833	-1.19116	3.30215	-1.92754	-1.08461	-2.25065	2.83482	-0.520599	1.60974	-4.39509	2.52872	0.92616	2.56011	1.38254	1.99922	-0.473022	2.53149	-4.4036	1.77272	-0.422968	1.92361
+	23.4706	3.0197	Q15124	Q15124	Phosphoglucomutase-like protein 5	PGM5	GO:0005975;GO:0007155;GO:0008152;GO:0009987;GO:0022610;GO:0044238	GO:0000287;GO:0003824;GO:0005198;GO:0005488;GO:0016853;GO:0016866;GO:0016868;GO:0043167;GO:0043169;GO:0046872	GO:0001725;GO:0005886;GO:0005911;GO:0005912;GO:0005913;GO:0005914;GO:0005924;GO:0005925;GO:0009898;GO:0014704;GO:0016010;GO:0016020;GO:0030018;GO:0030054;GO:0030055;GO:0032432;GO:0032991;GO:0042383;GO:0042641;GO:0043034;GO:0043234;GO:0044291;GO:0044422;GO:0044424;GO:0044425;GO:0044430;GO:0044444;GO:0044446;GO:0044449;GO:0044459;GO:0044464;GO:0070161		26	26	24	56.1	56.1	50.6	62.224	178.11	267490000	579	1.08671	-2.76714	1.89126	-2.31643	1.25953	-1.06083	1.02099	-3.3832	1.48369	-2.87165	1.72284	-1.52901	-0.862963	-3.71101	1.65365	-1.65347	1.81565	-4.0072	2.3945	-1.87165	0.690645	-2.19805	2.74806	-0.118396	2.78763	-3.87253	0.854873	-3.48698	1.60704
+	17.7574	3.00871	Q16787	Q16787	Laminin subunit alpha-3	LAMA3	GO:0007044;GO:0007155;GO:0008544;GO:0009888;GO:0009987;GO:0016043;GO:0022411;GO:0022607;GO:0022610;GO:0022617;GO:0030154;GO:0030155;GO:0030198;GO:0030334;GO:0031581;GO:0032502;GO:0032879;GO:0034329;GO:0034330;GO:0035987;GO:0040012;GO:0043062;GO:0045995;GO:0048856;GO:0048869;GO:0050789;GO:0050793;GO:0050794;GO:0051239;GO:0051270;GO:0065007;GO:0071840;GO:0071841;GO:0071842;GO:0071844;GO:0071845;GO:…	GO:0005198	GO:0005576;GO:0005604;GO:0005606;GO:0005610;GO:0031982;GO:0031988;GO:0032991;GO:0043226;GO:0043227;GO:0043230;GO:0043234;GO:0043256;GO:0044420;GO:0044421;GO:0065010;GO:0070062	REACT_118572;REACT_150180;REACT_150268;REACT_163874;REACT_163906;REACT_169262;REACT_20537	86	85	81	34.7	34.4	33.2	366.62	323.31	846280000	1885	1.42861	1.73281	1.12305	0.69034	0.394464	-2.45832	-0.3368	-2.34356	0.372854	-3.13849	1.69136	-2.64303	-1.10155	0.562922	3.31053	1.45325	2.3958	-1.78965	3.11191	-1.04189	1.65775	-1.2145	1.40732	1.66175	3.07133	-2.77159	1.57809	-0.648291	2.87841
+	21.7277	2.99762	Q16853;O75106	Q16853	Membrane primary amine oxidase	AOC3	GO:0006807;GO:0006810;GO:0006811;GO:0006812;GO:0006950;GO:0006952;GO:0006954;GO:0007155;GO:0008152;GO:0009308;GO:0009611;GO:0009987;GO:0022610;GO:0042221;GO:0046677;GO:0050896;GO:0051234	GO:0003824;GO:0005215;GO:0005216;GO:0005261;GO:0005488;GO:0005507;GO:0005509;GO:0005515;GO:0008131;GO:0008324;GO:0015075;GO:0015267;GO:0016491;GO:0016638;GO:0016641;GO:0022803;GO:0022838;GO:0022857;GO:0022891;GO:0022892;GO:0042802;GO:0042803;GO:0043167;GO:0043169;GO:0046872;GO:0046914;GO:0046982;GO:0046983;GO:0048037;GO:0048038;GO:0052593;GO:0052594;GO:0052595;GO:0052596	GO:0005737;GO:0005768;GO:0005769;GO:0005783;GO:0005794;GO:0005886;GO:0005902;GO:0009986;GO:0016020;GO:0016021;GO:0031224;GO:0042995;GO:0043226;GO:0043227;GO:0043229;GO:0043231;GO:0044424;GO:0044425;GO:0044444;GO:0044464		28	28	27	52.8	52.8	48	84.621	323.31	1009800000	887	4.70096	-0.264563	4.11215	0.989378	3.83347	2.31792	4.7516	-1.68053	4.74285	0.337117	4.97595	0.985689	-0.726355	-4.38733	4.99656	2.08371	3.06561	-0.498093	4.75187	0.661321	1.56864	0.824821	3.44946	0.60846	4.61764	-2.71846	3.47105	0.137657	4.05021
+	19.2448	2.98192	P29972	P29972	Aquaporin-1	AQP1	GO:0000302;GO:0001568;GO:0001666;GO:0003008;GO:0003014;GO:0003091;GO:0003094;GO:0003097;GO:0006139;GO:0006163;GO:0006164;GO:0006182;GO:0006753;GO:0006807;GO:0006810;GO:0006811;GO:0006812;GO:0006813;GO:0006820;GO:0006833;GO:0006884;GO:0006950;GO:0006970;GO:0006972;GO:0006979;GO:0006996;GO:0007010;GO:0007154;GO:0007163;GO:0007584;GO:0007586;GO:0007589;GO:0007600;GO:0008152;GO:0008284;GO:0008643;GO:…	GO:0005215;GO:0005216;GO:0005217;GO:0005221;GO:0005223;GO:0005261;GO:0005267;GO:0005372;GO:0008324;GO:0008519;GO:0015075;GO:0015077;GO:0015079;GO:0015101;GO:0015166;GO:0015168;GO:0015250;GO:0015254;GO:0015267;GO:0015276;GO:0015665;GO:0022803;GO:0022834;GO:0022836;GO:0022838;GO:0022857;GO:0022890;GO:0022891;GO:0022892;GO:0030184;GO:0035379;GO:0043855;GO:0046873	GO:0005634;GO:0005737;GO:0005886;GO:0005887;GO:0005903;GO:0009925;GO:0016020;GO:0016021;GO:0016323;GO:0016324;GO:0020003;GO:0031090;GO:0031224;GO:0031226;GO:0031253;GO:0031526;GO:0031965;GO:0031982;GO:0031988;GO:0033267;GO:0033643;GO:0033646;GO:0033655;GO:0042383;GO:0042995;GO:0043226;GO:0043227;GO:0043229;GO:0043230;GO:0043231;GO:0043679;GO:0044217;GO:0044306;GO:0044421;GO:0044422;GO:0044424;GO:…	REACT_121329;REACT_121380;REACT_23826;REACT_24023	8	8	7	43.5	43.5	43.5	28.526	323.31	381140000	469	4.37605	0.343269	3.8199	-0.740353	3.507	2.57413	3.34809	-0.0663233	3.60753	-1.12046	3.89108	-1.20983	2.86301	-0.656124	4.62831	2.33633	3.4786	-0.816513	4.12403	1.45606	3.07314	4.81695	3.44984	4.16548	3.67608	-2.0966	4.05687	-1.18002	4.25182
+	14.7132	2.97438	O14558	O14558	Heat shock protein beta-6	HSPB6	GO:0006937;GO:0044057;GO:0050789;GO:0051239;GO:0065007;GO:0090257	GO:0005198;GO:0005212;GO:0005488;GO:0005515;GO:0042802;GO:0042803;GO:0046983	GO:0005634;GO:0005737;GO:0043226;GO:0043227;GO:0043229;GO:0043231;GO:0044424;GO:0044464		9	9	9	92.5	92.5	92.5	17.135	147.14	323350000	356	4.83203	-0.881227	3.11546	3.05004	3.20645	2.42373	4.58491	-3.01846	1.76329	1.75585	3.73133	-1.38933	-0.167055	-5.51722	2.39737	-1.42251	-1.85321	-6.63242	2.18445	-2.96398	3.2884	2.24902	2.26093	1.67785	3.13516	-6.23201	2.03406	-4.6103	2.40464
+	22.6607	2.91417	Q9UGT4	Q9UGT4	Sushi domain-containing protein 2	SUSD2	GO:0002376;GO:0006955;GO:0048519;GO:0048523;GO:0050789;GO:0050794;GO:0050896;GO:0051302;GO:0051782;GO:0065007	GO:0001871;GO:0004872;GO:0005044;GO:0005488;GO:0030246;GO:0030247;GO:0038024	GO:0005886;GO:0016020;GO:0016021;GO:0031224;GO:0031982;GO:0031988;GO:0043226;GO:0043227;GO:0043230;GO:0044421;GO:0044425;GO:0044464;GO:0065010;GO:0070062		24	24	23	54.1	54.1	51	90.207	323.31	727680000	988	4.43719	-0.212076	2.76587	2.23449	2.97205	1.9002	3.48368	-1.83091	3.65566	2.09523	3.51035	-1.33403	-0.777725	-2.19332	3.4515	0.146156	2.85533	0.510675	2.70923	-1.03511	3.33328	1.87104	3.11604	2.74872	2.69176	-3.42406	3.44765	-2.24915	2.69574
+	17.717	2.89003	P02462	P02462	Collagen alpha-1(IV) chain;Arresten	COL4A1	GO:0001101;GO:0001569;GO:0001763;GO:0002009;GO:0006810;GO:0006897;GO:0006898;GO:0006935;GO:0007389;GO:0007411;GO:0007420;GO:0007528;GO:0008152;GO:0009605;GO:0009653;GO:0009719;GO:0009987;GO:0010033;GO:0010243;GO:0010324;GO:0014075;GO:0016043;GO:0016044;GO:0016192;GO:0022411;GO:0022617;GO:0030154;GO:0030198;GO:0030574;GO:0030855;GO:0032501;GO:0032502;GO:0032963;GO:0035239;GO:0040011;GO:0042221;GO:…	GO:0005198;GO:0005201;GO:0005488;GO:0005515;GO:0019838;GO:0030023;GO:0048407	GO:0005576;GO:0005581;GO:0005587;GO:0005604;GO:0005788;GO:0030935;GO:0031012;GO:0031974;GO:0043233;GO:0044420;GO:0044421;GO:0044422;GO:0044424;GO:0044432;GO:0044444;GO:0044446;GO:0044464;GO:0070013	REACT_118779;REACT_121139;REACT_13552;REACT_150180;REACT_150268;REACT_150401;REACT_163699;REACT_163874;REACT_163906;REACT_16888;REACT_169262;REACT_18312	12	12	8	9.7	9.7	8.8	160.61	277.95	743630000	725	1.63201	0.73102	2.01666	-1.29044	1.27612	-0.546455	1.42502	-3.52227	1.31994	-0.67961	2.11105	-3.36152	1.21459	-1.21198	4.44234	2.90576	3.90005	-0.0292892	4.31805	-0.0344133	1.07285	0.505798	3.28922	0.289784	4.09871	-3.29975	1.98755	-3.45875	3.63801
+	19.8055	2.88501	P20774	P20774	Mimecan	OGN	GO:0000271;GO:0000272;GO:0005975;GO:0005976;GO:0006022;GO:0006023;GO:0006024;GO:0006026;GO:0006027;GO:0006790;GO:0006807;GO:0008152;GO:0008285;GO:0009056;GO:0009057;GO:0009058;GO:0009059;GO:0009308;GO:0009987;GO:0016051;GO:0016052;GO:0018146;GO:0030203;GO:0042127;GO:0042339;GO:0042340;GO:0043170;GO:0044237;GO:0044238;GO:0044248;GO:0044249;GO:0044272;GO:0044273;GO:0044281;GO:0048519;GO:0048523;GO:…		GO:0005576;GO:0005578;GO:0005615;GO:0005775;GO:0005796;GO:0031012;GO:0031974;GO:0031982;GO:0031988;GO:0043202;GO:0043226;GO:0043227;GO:0043230;GO:0043233;GO:0044421;GO:0044422;GO:0044424;GO:0044431;GO:0044437;GO:0044444;GO:0044446;GO:0044464;GO:0065010;GO:0070013;GO:0070062	REACT_121120;REACT_121313;REACT_268431;REACT_268786	19	19	18	49	49	49	33.922	323.31	2129200000	1402	6.11356	2.92866	5.40292	3.13368	6.00373	4.05451	6.70715	-0.868361	4.5403	3.44244	6.03019	0.268333	2.79052	0.0124187	4.01079	-0.814312	2.35291	-1.12439	3.1101	1.44097	4.09146	2.23891	5.22567	3.85365	3.88133	0.501755	4.12662	-1.72206	5.28727
+	13.2784	2.87681	Q15847	Q15847	Adipogenesis regulatory factor	ADIRF	GO:0006139;GO:0006351;GO:0006355;GO:0006357;GO:0006807;GO:0008152;GO:0009058;GO:0009059;GO:0009314;GO:0009628;GO:0009889;GO:0009891;GO:0009893;GO:0009987;GO:0010468;GO:0010556;GO:0010557;GO:0010604;GO:0010628;GO:0016070;GO:0019219;GO:0019222;GO:0030154;GO:0031323;GO:0031325;GO:0031326;GO:0031328;GO:0032502;GO:0032774;GO:0034641;GO:0034645;GO:0043170;GO:0044237;GO:0044238;GO:0044249;GO:0044260;GO:…		GO:0005634;GO:0005654;GO:0005737;GO:0031982;GO:0031988;GO:0043226;GO:0043227;GO:0043229;GO:0043230;GO:0043231;GO:0044421;GO:0044422;GO:0044424;GO:0044428;GO:0044446;GO:0044464;GO:0065010;GO:0070062		5	5	5	71.1	71.1	71.1	7.8547	323.31	281020000	411	3.90597	-1.71315	2.93509	5.9237	2.78728	0.945814	3.1977	-0.52954	3.41115	-1.47769	3.47633	-1.77829	-2.59049	-2.6561	2.61505	-1.75528	1.74953	-0.717611	2.10743	-4.45081	6.2712	4.42288	2.7897	1.05453	2.98979	1.74254	2.86958	-1.81794	2.89183
+	14.4773	2.87105	Q08495	Q08495	Dematin	DMTN	GO:0001932;GO:0001933;GO:0001952;GO:0001953;GO:0006461;GO:0006810;GO:0006996;GO:0007010;GO:0007015;GO:0007162;GO:0007165;GO:0008064;GO:0008360;GO:0009306;GO:0009892;GO:0009966;GO:0009967;GO:0009987;GO:0010033;GO:0010035;GO:0010038;GO:0010563;GO:0010591;GO:0010605;GO:0010639;GO:0010646;GO:0010647;GO:0010762;GO:0010763;GO:0010799;GO:0010801;GO:0010810;GO:0010812;GO:0015031;GO:0016043;GO:0019220;GO:…	GO:0003779;GO:0005102;GO:0005488;GO:0005515;GO:0008092;GO:0030507;GO:0043621	GO:0005829;GO:0005856;GO:0005884;GO:0005886;GO:0012505;GO:0014731;GO:0015629;GO:0016020;GO:0016023;GO:0030863;GO:0031090;GO:0031095;GO:0031253;GO:0031410;GO:0031982;GO:0031988;GO:0032991;GO:0043226;GO:0043227;GO:0043228;GO:0043229;GO:0043231;GO:0043232;GO:0043234;GO:0044422;GO:0044424;GO:0044425;GO:0044430;GO:0044444;GO:0044446;GO:0044448;GO:0044459;GO:0044463;GO:0044464;GO:0048471	REACT_268444	15	15	15	50.6	50.6	50.6	45.514	79.264	138720000	341	0.239705	0.970551	0.172598	0.299416	2.12802	-0.0153866	1.24676	-2.04243	2.77419	-0.966821	1.16811	-1.76532	-0.881929	-4.84357	1.40918	-2.07785	-1.07711	-3.01713	1.78853	3.0667	0.536449	-0.804276	-0.306105	0.479674	0.621982	-3.25026	1.8788	-2.07717	0.876135
+	25.3622	2.84955	P55268	P55268	Laminin subunit beta-2	LAMB2	GO:0002064;GO:0003008;GO:0006935;GO:0007155;GO:0007411;GO:0007528;GO:0007600;GO:0007601;GO:0009605;GO:0009987;GO:0014002;GO:0014044;GO:0016043;GO:0016049;GO:0021782;GO:0022610;GO:0030198;GO:0032501;GO:0032502;GO:0032836;GO:0040007;GO:0040011;GO:0042221;GO:0042330;GO:0043062;GO:0048468;GO:0048588;GO:0048589;GO:0048675;GO:0048676;GO:0048677;GO:0048682;GO:0048856;GO:0048869;GO:0050808;GO:0050877;GO:…	GO:0005198	GO:0005576;GO:0005604;GO:0005605;GO:0005608;GO:0031982;GO:0031988;GO:0032991;GO:0043226;GO:0043227;GO:0043230;GO:0043234;GO:0043256;GO:0043260;GO:0044420;GO:0044421;GO:0045202;GO:0065010;GO:0070062	REACT_163874;REACT_163906;REACT_169262	78	78	69	53.1	53.1	46.5	195.98	323.31	2089200000	2268	3.85172	1.26489	3.62531	3.16795	3.26644	2.66408	3.45861	0.433333	3.57255	1.67514	3.99356	1.66644	2.90476	0.881374	5.52654	3.73397	4.69768	1.10815	5.33975	0.822583	2.84105	2.64884	4.15858	3.86008	5.38035	-2.01117	3.96761	0.17454	5.24016
+	17.5773	2.84522	O95833	O95833	Chloride intracellular channel protein 3	CLIC3	GO:0006810;GO:0006811;GO:0006820;GO:0006821;GO:0007165;GO:0009987;GO:0015698;GO:0050789;GO:0050794;GO:0050896;GO:0051234;GO:0051716;GO:0065007	GO:0005215;GO:0005216;GO:0005244;GO:0005253;GO:0005254;GO:0008509;GO:0015075;GO:0015267;GO:0022803;GO:0022832;GO:0022836;GO:0022838;GO:0022857;GO:0022891;GO:0022892	GO:0005634;GO:0005737;GO:0031982;GO:0031988;GO:0032991;GO:0034702;GO:0034707;GO:0043226;GO:0043227;GO:0043229;GO:0043230;GO:0043231;GO:0043234;GO:0044421;GO:0044424;GO:0044425;GO:0044464;GO:0065010;GO:0070062		23	23	21	92.8	92.8	84.3	26.648	219.91	247820000	474	3.65291	-0.45756	1.79189	3.67963	0.883244	1.39427	2.26779	-1.36924	2.14183	-1.90515	2.79917	-1.62752	-0.455742	-3.7552	1.74033	-0.507315	1.53063	-2.48328	0.792965	-1.77419	3.68314	2.11637	2.61729	1.9649	1.68432	-3.31946	2.18393	-1.28336	2.33356
+	9.91649	2.83691	P02144	P02144	Myoglobin	MB	GO:0000302;GO:0001666;GO:0003008;GO:0003009;GO:0003010;GO:0003012;GO:0006936;GO:0006941;GO:0006950;GO:0006979;GO:0007507;GO:0009719;GO:0009725;GO:0009987;GO:0010033;GO:0010035;GO:0014721;GO:0030099;GO:0030154;GO:0030218;GO:0031444;GO:0032501;GO:0032502;GO:0042221;GO:0042542;GO:0043353;GO:0045444;GO:0048513;GO:0048856;GO:0048869;GO:0050873;GO:0050896;GO:0070482	GO:0005215;GO:0005344;GO:0005488;GO:0005506;GO:0019825;GO:0020037;GO:0022892;GO:0043167;GO:0043169;GO:0046872;GO:0046906;GO:0046914	GO:0031982;GO:0031988;GO:0043226;GO:0043227;GO:0043230;GO:0044421;GO:0065010;GO:0070062		16	16	15	90.3	90.3	90.3	17.184	238.02	254710000	405	2.12474	-0.929918	1.69823	0.549572	2.65621	-2.04054	4.42223	-3.39699	-1.83569	0.775353	2.62138	-1.47563	0.43899	-5.58042	0.297602	-4.59174	-2.13573	-5.13916	-5.44211	-1.6082	3.92514	1.11328	-2.88647	-2.6663	-2.6123	-5.34146	-0.0625715	-3.1144	1.67174
+	12.1244	2.83061	Q15493	Q15493	Regucalcin	RGN	GO:0006082;GO:0006140;GO:0006766;GO:0006767;GO:0006873;GO:0006874;GO:0006875;GO:0008152;GO:0009058;GO:0009110;GO:0009894;GO:0009966;GO:0009987;GO:0016053;GO:0019219;GO:0019222;GO:0019725;GO:0019752;GO:0019852;GO:0019853;GO:0023051;GO:0030003;GO:0030811;GO:0031323;GO:0031329;GO:0032781;GO:0033121;GO:0042180;GO:0042364;GO:0042592;GO:0043085;GO:0043436;GO:0043462;GO:0044093;GO:0044237;GO:0044249;GO:…	GO:0003824;GO:0004341;GO:0005488;GO:0005509;GO:0008270;GO:0016787;GO:0016788;GO:0030234;GO:0043167;GO:0043169;GO:0046872;GO:0046914;GO:0052689	GO:0005634;GO:0005654;GO:0005737;GO:0043226;GO:0043227;GO:0043229;GO:0043231;GO:0044422;GO:0044424;GO:0044428;GO:0044446;GO:0044464		7	7	7	26.1	26.1	26.1	33.252	57.816	151540000	107	3.40194	-3.91144	2.40579	0.527567	1.59553	0.976351	3.34998	-1.08642	3.86938	-5.24705	2.67484	-3.44808	0.969599	-0.474449	2.94545	-1.3569	1.35993	-0.99893	2.79764	-4.35387	3.10764	1.15289	1.613	0.53889	2.7828	-3.63856	-1.35291	-4.75865	1.57659
+	7.1385	2.80156	P11686	P11686	Pulmonary surfactant-associated protein C	SFTPC	GO:0002237;GO:0006461;GO:0006950;GO:0007584;GO:0007585;GO:0007623;GO:0009605;GO:0009607;GO:0009612;GO:0009628;GO:0009719;GO:0009725;GO:0009743;GO:0009746;GO:0009749;GO:0009987;GO:0009991;GO:0010033;GO:0010035;GO:0016043;GO:0022607;GO:0031667;GO:0031960;GO:0032496;GO:0032501;GO:0032526;GO:0033189;GO:0033273;GO:0034097;GO:0034284;GO:0042221;GO:0043933;GO:0048511;GO:0048545;GO:0050896;GO:0051259;GO:…		GO:0005615;GO:0005768;GO:0005770;GO:0005771;GO:0043226;GO:0043227;GO:0043229;GO:0043231;GO:0044421;GO:0044424;GO:0044444;GO:0044464		5	5	4	39.6	39.6	24.4	21.053	26.002	156970000	100	5.0988	-2.26016	4.32522	2.16199	-5.01176	-5.06005	4.42316	-4.99332	-3.61394	-5.26917	-4.11393	-3.79831	-2.7671	-2.6144	3.80309	-2.99355	0.724237	-4.27182	3.05438	-2.5248	-3.60412	2.75207	3.77902	4.39192	1.12311	-0.786751	1.36345	-4.7557	4.01412
+	13.2503	2.76288	Q9GZM7	Q9GZM7	Tubulointerstitial nephritis antigen-like	TINAGL1	GO:0002376;GO:0006810;GO:0006955;GO:0007155;GO:0009987;GO:0016192;GO:0016197;GO:0022610;GO:0046907;GO:0050896;GO:0051234;GO:0051649	GO:0001871;GO:0003824;GO:0004872;GO:0005044;GO:0005198;GO:0005201;GO:0005488;GO:0008233;GO:0008234;GO:0016787;GO:0030246;GO:0030247;GO:0038024;GO:0070011	GO:0005576;GO:0005615;GO:0005737;GO:0031982;GO:0031988;GO:0043226;GO:0043227;GO:0043230;GO:0044421;GO:0044424;GO:0044464;GO:0065010;GO:0070062		16	16	14	56.5	56.5	48.6	52.387	192.15	214700000	302	0.0936556	-0.0141678	0.986277	-4.03066	-0.0498791	-1.35153	-1.19167	-4.58094	-0.799623	-1.50283	-0.464806	-2.34199	-1.81944	1.4659	1.23749	-2.11683	1.69925	3.08458	2.37421	-1.87574	1.68834	-2.94692	2.64249	-2.84248	3.17393	-5.08228	3.33786e-05	-1.60887	2.80432
+	14.7089	2.73761	Q07075	Q07075	Glutamyl aminopeptidase	ENPEP	GO:0001525;GO:0001990;GO:0002003;GO:0002005;GO:0003008;GO:0003044;GO:0003073;GO:0003081;GO:0006928;GO:0007154;GO:0007267;GO:0008152;GO:0008217;GO:0008283;GO:0009056;GO:0009057;GO:0009987;GO:0010817;GO:0016477;GO:0016485;GO:0016486;GO:0019538;GO:0023052;GO:0030163;GO:0032501;GO:0032502;GO:0032835;GO:0040011;GO:0042445;GO:0043170;GO:0044236;GO:0044237;GO:0044238;GO:0044243;GO:0044254;GO:0044259;GO:…	GO:0003824;GO:0004177;GO:0005488;GO:0008233;GO:0008235;GO:0008237;GO:0008238;GO:0008270;GO:0016787;GO:0043167;GO:0043169;GO:0046872;GO:0046914;GO:0070006;GO:0070011	GO:0005765;GO:0005774;GO:0005886;GO:0005887;GO:0005903;GO:0009897;GO:0016020;GO:0016021;GO:0016324;GO:0031090;GO:0031224;GO:0031226;GO:0031410;GO:0031982;GO:0031988;GO:0042995;GO:0043226;GO:0043227;GO:0043229;GO:0043230;GO:0044421;GO:0044422;GO:0044424;GO:0044425;GO:0044437;GO:0044444;GO:0044446;GO:0044459;GO:0044464;GO:0045177;GO:0065010;GO:0070062	REACT_147707	20	20	20	23.8	23.8	23.8	109.24	172.93	83090000	282	2.11053	-2.38194	-0.0824089	-3.52579	-0.948847	-4.72208	1.04369	-6.14995	-1.3309	-3.4514	0.70911	-2.97538	-4.48433	-3.76371	0.907295	-1.05966	-3.44529	-4.89781	-3.59743	-3.78929	-1.47784	-5.0233	-0.0316982	0.351991	-2.41242	-7.28032	-1.57689	-4.37545	-0.314039
+	8.04304	2.7275	P15502	P15502	Elastin	ELN	GO:0003008;GO:0003013;GO:0007585;GO:0008015;GO:0008283;GO:0009653;GO:0009887;GO:0009987;GO:0016043;GO:0022411;GO:0022617;GO:0030198;GO:0032501;GO:0032502;GO:0043062;GO:0071840;GO:0071841;GO:0071842;GO:0071845	GO:0005198;GO:0005201	GO:0005576;GO:0005578;GO:0031012;GO:0044420;GO:0044421;GO:0071953	REACT_118572;REACT_150331;REACT_150366	16	16	16	45.4	45.4	45.4	68.397	323.31	1886100000	876	1.25602	-2.54053	-1.08216	-1.25959	-1.75307	-1.95727	1.12429	-4.54703	-0.445492	-3.85122	1.18625	-1.9526	2.37325	0.36108	4.4578	3.64047	5.07484	-0.818398	5.92048	0.603505	-1.04865	-0.370796	4.37539	3.31178	5.06705	-4.12011	3.47717	-2.80899	6.69456
+	16.2108	2.72653	P55087	P55087	Aquaporin-4	AQP4	GO:0003008;GO:0003014;GO:0003091;GO:0003097;GO:0006461;GO:0006810;GO:0006811;GO:0006833;GO:0006884;GO:0006950;GO:0006970;GO:0006972;GO:0007565;GO:0007600;GO:0007605;GO:0008643;GO:0009314;GO:0009628;GO:0009651;GO:0009719;GO:0009725;GO:0009987;GO:0009992;GO:0010033;GO:0015669;GO:0015670;GO:0015791;GO:0015793;GO:0015850;GO:0016043;GO:0019725;GO:0022414;GO:0022607;GO:0030104;GO:0031960;GO:0032355;GO:…	GO:0005215;GO:0005372;GO:0015166;GO:0015168;GO:0015250;GO:0015254;GO:0015267;GO:0015288;GO:0015665;GO:0022803;GO:0022829;GO:0022838;GO:0022857;GO:0022891;GO:0022892	GO:0005737;GO:0005886;GO:0005887;GO:0005911;GO:0009897;GO:0016020;GO:0016021;GO:0016323;GO:0030054;GO:0030315;GO:0031224;GO:0031226;GO:0032991;GO:0043234;GO:0044424;GO:0044425;GO:0044459;GO:0044464	REACT_23826;REACT_24023	5	5	5	18	18	18	34.829	31.829	85608000	181	1.59318	-1.73149	0.519651	-1.19164	-0.806967	1.54963	0.218063	-4.60958	1.1475	-4.47198	-0.522018	-2.58491	0.406744	-2.49338	-0.20302	-1.32078	0.316036	-3.36207	0.397547	-2.88711	2.33766	-1.27464	-2.02224	-0.102048	1.13832	-4.72669	1.53767	-2.69843	0.936996
+	16.9786	2.72331	O76041	O76041	Nebulette	NEBL	GO:0006996;GO:0007010;GO:0007015;GO:0009987;GO:0016043;GO:0030029;GO:0030036;GO:0071691;GO:0071840;GO:0071841;GO:0071842	GO:0003779;GO:0005198;GO:0005488;GO:0005515;GO:0005523;GO:0008092;GO:0008307;GO:0031005;GO:0051015	GO:0001725;GO:0030018;GO:0031674;GO:0031982;GO:0031988;GO:0032432;GO:0042641;GO:0043226;GO:0043227;GO:0043230;GO:0044421;GO:0044422;GO:0044424;GO:0044430;GO:0044444;GO:0044446;GO:0044449;GO:0044464;GO:0065010;GO:0070062		9	9	9	11.5	11.5	11.5	116.45	63.053	92921000	296	1.19696	-3.71366	0.916641	-2.10957	-1.97915	-3.61256	0.798197	-3.635	-1.45403	-4.86367	0.820189	-3.80845	-1.81174	-3.73065	1.00714	-0.495411	1.26608	-0.287504	0.986389	-3.27929	-3.98102	-1.77688	0.0438766	0.85543	1.70339	-1.82158	1.38793	-3.9766	1.67685
+	15.5053	2.71864	P28906	P28906	Hematopoietic progenitor cell antigen CD34	CD34	GO:0001525;GO:0001817;GO:0001818;GO:0001819;GO:0001894;GO:0001935;GO:0002376;GO:0002682;GO:0003008;GO:0003014;GO:0003094;GO:0003158;GO:0006928;GO:0007154;GO:0007155;GO:0007160;GO:0007165;GO:0007267;GO:0008217;GO:0008283;GO:0009888;GO:0009889;GO:0009890;GO:0009892;GO:0009893;GO:0009987;GO:0010468;GO:0010604;GO:0010605;GO:0010628;GO:0010629;GO:0016043;GO:0016337;GO:0016477;GO:0019222;GO:0022603;GO:…	GO:0005488;GO:0005515;GO:0008134;GO:0030246;GO:0043167;GO:0043168;GO:0043199	GO:0000323;GO:0005737;GO:0005764;GO:0005773;GO:0005886;GO:0005887;GO:0009897;GO:0009925;GO:0016020;GO:0016021;GO:0016324;GO:0031224;GO:0031226;GO:0043226;GO:0043227;GO:0043229;GO:0043231;GO:0044421;GO:0044424;GO:0044425;GO:0044444;GO:0044459;GO:0044464;GO:0045171;GO:0048471	REACT_11152	5	5	5	22.9	22.9	22.9	40.716	84.942	63672000	146	3.26264	-2.90343	2.49483	-0.495493	1.55611	-1.19711	-0.646852	-3.79628	0.396753	-3.32294	2.59877	-3.07806	-3.22923	-5.68883	0.272713	-0.867235	0.701349	-1.57866	-0.174711	-4.34352	3.7128	0.550383	0.993988	-0.849023	2.33182	-5.29611	-1.14219	-3.37886	1.7859
+	13.4402	2.70301	Q9BW04	Q9BW04	Specifically androgen-regulated gene protein	SARG			GO:0005737;GO:0031982;GO:0031988;GO:0043226;GO:0043227;GO:0043230;GO:0044421;GO:0044424;GO:0044464;GO:0065010;GO:0070062		24	24	24	57.9	57.9	57.9	63.964	323.31	507780000	1089	2.98509	-1.47521	1.93431	4.04592	0.991743	2.7192	1.73839	-1.65445	1.95193	-3.01443	2.30956	-2.34925	0.258469	-4.41238	2.15703	0.827801	1.95716	-0.856926	1.82684	-2.01109	3.88957	1.63712	2.49112	2.625	1.84849	-2.18561	2.34255	-3.81836	2.59396
+	14.8291	2.65121	P16452	P16452	Erythrocyte membrane protein band 4.2	EPB42	GO:0000902;GO:0006464;GO:0008152;GO:0008360;GO:0009653;GO:0009987;GO:0016043;GO:0018149;GO:0019538;GO:0020027;GO:0021700;GO:0022603;GO:0022604;GO:0032502;GO:0032989;GO:0042592;GO:0043170;GO:0043249;GO:0043412;GO:0044237;GO:0044238;GO:0044260;GO:0044267;GO:0048469;GO:0048513;GO:0048534;GO:0048536;GO:0048856;GO:0048869;GO:0048878;GO:0050789;GO:0050793;GO:0050794;GO:0050801;GO:0051128;GO:0055072;GO:…	GO:0000166;GO:0003810;GO:0003824;GO:0005198;GO:0005200;GO:0005488;GO:0005524;GO:0016740;GO:0016746;GO:0016755;GO:0017076;GO:0030554;GO:0032553;GO:0032555;GO:0032559;GO:0035639	GO:0005856;GO:0005886;GO:0016020;GO:0030863;GO:0043226;GO:0043228;GO:0043229;GO:0043232;GO:0044424;GO:0044444;GO:0044448;GO:0044464		27	27	24	42.4	42.4	37.2	77.008	161.65	237030000	642	0.572413	2.27465	1.07565	-2.35911	2.72586	1.11749	2.32784	0.484265	3.18009	-0.780591	2.12626	0.0119076	-1.09997	-2.9233	2.60662	-0.672333	0.434549	-2.22277	2.9346	3.76563	3.67145	-0.262335	1.23899	1.33593	1.17129	-4.2051	1.99045	-0.121351	1.43654
+	25.8767	2.63659	O15230	O15230	Laminin subunit alpha-5	LAMA5	GO:0000902;GO:0000904;GO:0001525;GO:0001658;GO:0001667;GO:0001738;GO:0001755;GO:0001763;GO:0001942;GO:0002009;GO:0006928;GO:0006996;GO:0007010;GO:0007044;GO:0007155;GO:0007165;GO:0007166;GO:0007229;GO:0007517;GO:0008037;GO:0008283;GO:0008544;GO:0009653;GO:0009790;GO:0009887;GO:0009888;GO:0009987;GO:0010927;GO:0016043;GO:0016331;GO:0016477;GO:0022404;GO:0022405;GO:0022411;GO:0022607;GO:0022610;GO:…	GO:0005102;GO:0005178;GO:0005198;GO:0005488;GO:0005515;GO:0032403	GO:0005576;GO:0005604;GO:0005605;GO:0005606;GO:0005610;GO:0005615;GO:0005634;GO:0031012;GO:0031982;GO:0031988;GO:0032991;GO:0043226;GO:0043227;GO:0043229;GO:0043230;GO:0043231;GO:0043234;GO:0043256;GO:0043259;GO:0043260;GO:0044420;GO:0044421;GO:0044424;GO:0044464;GO:0065010;GO:0070062	REACT_118572;REACT_163874;REACT_163906;REACT_169262	90	90	80	36.6	36.6	32.4	399.73	323.31	1524100000	2966	2.1744	0.0368996	1.7658	1.01532	1.3911	0.313072	1.44748	-1.5566	1.76649	-0.904662	2.07355	-0.984224	1.23603	-0.253092	3.84325	2.02166	3.03534	-0.476597	3.53359	-0.00386524	2.14742	0.474043	2.75874	2.05484	3.36193	-2.04119	1.87836	-1.01903	3.58697
+	16.7824	2.63044	O95171	O95171	Sciellin	SCEL	GO:0008544;GO:0009790;GO:0009888;GO:0009913;GO:0009987;GO:0030154;GO:0030216;GO:0030855;GO:0032502;GO:0048856;GO:0048869	GO:0005488;GO:0008270;GO:0043167;GO:0043169;GO:0046872;GO:0046914	GO:0001533;GO:0005737;GO:0005856;GO:0031982;GO:0031988;GO:0043226;GO:0043227;GO:0043228;GO:0043229;GO:0043230;GO:0043232;GO:0044421;GO:0044424;GO:0044464;GO:0065010;GO:0070062		26	26	26	44.2	44.2	44.2	77.551	148.41	418470000	733	4.07658	1.9789	2.82055	0.0785637	2.03329	-1.48555	1.56941	-1.38626	2.69043	-1.40966	3.35955	-1.11295	2.16821	-0.99387	3.92432	1.95948	3.42246	-0.721819	3.18981	-0.295627	3.89277	1.49304	3.04488	2.6859	3.40644	-2.69662	3.31226	-0.913002	3.52989
+	19.4173	2.61944	P0CAP1	P0CAP1	Myocardial zonula adherens protein	MYZAP	GO:0007165;GO:0009987;GO:0035556;GO:0050789;GO:0050794;GO:0050896;GO:0051716;GO:0065007		GO:0005856;GO:0019897;GO:0019898;GO:0030018;GO:0030054;GO:0031234;GO:0031674;GO:0043226;GO:0043228;GO:0043229;GO:0043232;GO:0044422;GO:0044424;GO:0044425;GO:0044444;GO:0044449;GO:0044459;GO:0044464		8	8	8	27	27	27	54.205	37.954	27741000	68	-0.124301	-0.805868	-1.07971	-5.41003	0.035717	-4.1853	-1.58209	-4.42116	-0.928907	-4.17368	-1.32214	-0.868792	-0.61496	-4.23997	-0.134291	-4.20918	0.372889	-3.50316	-0.71879	-4.16442	0.140951	-3.45048	-4.69153	-4.64846	0.0650816	-4.35565	-1.37582	-3.56388	-1.09372
+	18.546	2.6142	Q16602	Q16602	Calcitonin gene-related peptide type 1 receptor	CALCRL	GO:0001525;GO:0006139;GO:0006140;GO:0006163;GO:0006164;GO:0006171;GO:0006753;GO:0006807;GO:0006810;GO:0006811;GO:0006812;GO:0006816;GO:0006897;GO:0006898;GO:0006937;GO:0007165;GO:0007166;GO:0007186;GO:0007187;GO:0007188;GO:0007189;GO:0007190;GO:0007507;GO:0008152;GO:0008284;GO:0009058;GO:0009117;GO:0009123;GO:0009124;GO:0009165;GO:0009187;GO:0009190;GO:0009743;GO:0009744;GO:0009889;GO:0009891;GO:…	GO:0001605;GO:0001635;GO:0001653;GO:0004871;GO:0004872;GO:0004888;GO:0004930;GO:0004948;GO:0005215;GO:0005488;GO:0008528;GO:0008565;GO:0022892;GO:0038023;GO:0042277;GO:0060089	GO:0000323;GO:0005764;GO:0005768;GO:0005773;GO:0005783;GO:0005886;GO:0005887;GO:0016020;GO:0016021;GO:0031224;GO:0031226;GO:0043226;GO:0043227;GO:0043229;GO:0043231;GO:0044424;GO:0044425;GO:0044444;GO:0044459;GO:0044464	REACT_18290;REACT_19327	6	6	6	18.9	18.9	18.9	52.978	46.328	71555000	123	-0.502885	-1.93339	0.928793	-2.83956	-0.964645	-3.33607	-0.253265	-1.32445	-0.161747	-2.18403	1.73244	-4.60295	-3.40169	-3.04162	2.6645	-1.65209	1.64547	-3.04605	-0.0623093	-3.46914	-0.248165	-4.38853	-0.0839329	-0.993697	0.81183	-3.53606	0.20015	-2.88657	-0.4128
+	11.9723	2.59361	O60237	O60237	Protein phosphatase 1 regulatory subunit 12B	PPP1R12B	GO:0000086;GO:0000278;GO:0006937;GO:0007049;GO:0007165;GO:0007264;GO:0009987;GO:0019222;GO:0022402;GO:0035556;GO:0043085;GO:0044057;GO:0044093;GO:0050789;GO:0050790;GO:0050794;GO:0050896;GO:0051239;GO:0051716;GO:0065007;GO:0065009;GO:0090257	GO:0008047;GO:0019208;GO:0030234	GO:0005654;GO:0005829;GO:0044422;GO:0044424;GO:0044428;GO:0044444;GO:0044446;GO:0044464	REACT_160315;REACT_355192;REACT_355347;REACT_355542	9	8	8	10.5	9.5	9.5	110.4	61.594	215560000	241	3.05037	-2.48852	2.79835	-0.1658	3.02888	-0.0836048	3.11714	-4.58025	2.66611	-3.82023	2.96425	-0.490314	0.237345	-2.19532	1.87946	-1.236	2.18992	0.846184	2.03218	-3.80876	3.72406	-0.185886	4.03978	0.202579	2.76622	1.03471	0.859803	-1.65595	2.60021
+	15.9321	2.58897	O75558	O75558	Syntaxin-11	STX11	GO:0001775;GO:0002252;GO:0002263;GO:0002274;GO:0002275;GO:0002283;GO:0002285;GO:0002286;GO:0002323;GO:0002366;GO:0002376;GO:0006810;GO:0006886;GO:0006887;GO:0006906;GO:0006944;GO:0006996;GO:0009987;GO:0015031;GO:0016043;GO:0016044;GO:0016050;GO:0016192;GO:0022406;GO:0030101;GO:0031629;GO:0032940;GO:0042110;GO:0042119;GO:0043299;GO:0043312;GO:0043316;GO:0043320;GO:0045055;GO:0045184;GO:0045321;GO:…	GO:0000149;GO:0005484;GO:0005488;GO:0005515	GO:0005794;GO:0005886;GO:0008021;GO:0012505;GO:0016020;GO:0016021;GO:0016023;GO:0030135;GO:0030136;GO:0031201;GO:0031224;GO:0031410;GO:0031982;GO:0031988;GO:0032991;GO:0043226;GO:0043227;GO:0043229;GO:0043231;GO:0043234;GO:0044424;GO:0044425;GO:0044444;GO:0044456;GO:0044464		9	9	9	43.9	43.9	43.9	33.195	115.46	223430000	242	4.52369	2.34532	3.67432	3.89697	3.47528	1.1768	2.25071	0.201043	3.97724	2.36841	3.37925	1.43703	0.326982	-1.00887	3.22327	0.889891	3.08387	-0.660604	2.97204	0.783435	5.86404	2.72903	3.12695	1.63262	3.04767	-1.82915	3.50456	1.01705	2.67321
+	12.3926	2.58724	Q9NRN5	Q9NRN5	Olfactomedin-like protein 3	OLFML3	GO:0007275;GO:0032501;GO:0032502		GO:0005576;GO:0031982;GO:0043226		10	10	8	34.5	34.5	27.6	46.01	72.793	112820000	153	-0.335629	-0.303814	1.30804	-1.28624	2.30794	-1.22987	2.36394	-4.92119	2.41171	-2.30515	1.14297	-1.6588	-0.987146	-0.924744	0.829691	-1.23236	-1.17813	-3.35406	1.9338	1.96689	-0.190256	-4.72606	1.12174	-0.294061	0.676337	-4.31199	-1.62874	-4.4897	1.50624
+	22.418	2.51113	O15061	O15061	Synemin	SYNM	GO:0006996;GO:0007010;GO:0009987;GO:0016043;GO:0045103;GO:0045104;GO:0071840;GO:0071841;GO:0071842	GO:0005198;GO:0005200;GO:0005488;GO:0005515;GO:0008092;GO:0008307;GO:0017166;GO:0019215;GO:0032403	GO:0005856;GO:0005882;GO:0005912;GO:0016020;GO:0030054;GO:0032991;GO:0043034;GO:0043226;GO:0043228;GO:0043229;GO:0043232;GO:0043234;GO:0044422;GO:0044424;GO:0044430;GO:0044444;GO:0044446;GO:0044449;GO:0044464;GO:0045111;GO:0060053;GO:0070161		26	26	25	25.2	25.2	23.8	172.87	164.07	90456000	227	0.865481	-0.906467	0.994869	-3.21556	-0.985165	-1.9641	-1.53348	-3.54421	-0.253828	-3.23388	0.855692	-2.82351	-2.7222	-2.86616	-0.387234	-2.80094	0.742407	-4.10408	-0.818621	-0.195405	1.50257	-2.55707	1.35993	-4.64965	0.855443	-3.80794	-1.06703	-2.36971	-1.25443
+	6.84722	2.47118	Q12912	Q12912	Lymphoid-restricted membrane protein;Processed lymphoid-restricted membrane protein	LRMP	GO:0002376;GO:0006903;GO:0006906;GO:0006944;GO:0006996;GO:0007338;GO:0009566;GO:0009987;GO:0016043;GO:0016044;GO:0016050;GO:0022414;GO:0048284;GO:0061024;GO:0061025;GO:0071840;GO:0071841;GO:0071842		GO:0000922;GO:0005635;GO:0005694;GO:0005789;GO:0005815;GO:0005887;GO:0016020;GO:0016021;GO:0030176;GO:0031090;GO:0031224;GO:0031226;GO:0031227;GO:0031300;GO:0031301;GO:0031967;GO:0031975;GO:0043226;GO:0043228;GO:0043229;GO:0043232;GO:0044422;GO:0044424;GO:0044425;GO:0044428;GO:0044430;GO:0044432;GO:0044444;GO:0044446;GO:0044459;GO:0044464		7	7	6	21.6	21.6	19.1	62.121	34.669	510360000	272	0.361218	3.39355	-1.14298	3.59855	1.01585	-0.959719	2.32199	-1.57073	4.90639	2.32714	0.727119	-0.931702	-3.07073	-3.9325	0.228004	-3.69377	-0.222816	-4.82778	-0.454786	5.40931	3.5892	0.146915	4.18658	-0.210692	0.0142908	0.219219	0.0561266	2.67842	1.29087
+	12.8277	2.46344	Q13201	Q13201	Multimerin-1;Platelet glycoprotein Ia*;155 kDa platelet multimerin	MMRN1	GO:0001775;GO:0002576;GO:0006810;GO:0006887;GO:0007155;GO:0007596;GO:0007599;GO:0009987;GO:0016192;GO:0022610;GO:0030168;GO:0032501;GO:0032940;GO:0046903;GO:0050817;GO:0050878;GO:0051234;GO:0051649;GO:0065007;GO:0065008		GO:0005576;GO:0031093;GO:0031974;GO:0031983;GO:0034774;GO:0043233;GO:0044422;GO:0044424;GO:0044433;GO:0044444;GO:0044446;GO:0044464;GO:0060205	REACT_318	15	15	15	19.5	19.5	19.5	138.11	111.82	47419000	77	-0.546294	-6.58757	-1.03812	-1.60497	-0.241816	-4.22222	0.765085	-4.11441	-3.58111	0.166039	0.736176	-5.23458	-0.357601	-4.85734	-0.653316	-0.295532	-0.699171	-3.78231	0.992237	-1.15944	0.790293	-0.818052	-4.0889	-0.580873	-1.1058	-1.37411	-3.68002	-4.03692	1.42332
+	12.7744	2.46065	P55290	P55290	Cadherin-13	CDH13	GO:0001525;GO:0001936;GO:0001938;GO:0001952;GO:0001954;GO:0002040;GO:0006355;GO:0006357;GO:0006928;GO:0007155;GO:0007156;GO:0007162;GO:0007165;GO:0007264;GO:0007265;GO:0007266;GO:0008283;GO:0008284;GO:0008285;GO:0009889;GO:0009891;GO:0009893;GO:0009966;GO:0009967;GO:0009987;GO:0010468;GO:0010556;GO:0010557;GO:0010604;GO:0010628;GO:0010646;GO:0010647;GO:0010810;GO:0010811;GO:0016043;GO:0016337;GO:…	GO:0005488;GO:0005509;GO:0005515;GO:0030169;GO:0042562;GO:0043167;GO:0043169;GO:0045296;GO:0046872;GO:0050839;GO:0055100;GO:0071813;GO:0071814	GO:0005615;GO:0005737;GO:0005886;GO:0005901;GO:0005912;GO:0005924;GO:0005925;GO:0009897;GO:0016020;GO:0030054;GO:0030055;GO:0031224;GO:0031225;GO:0031982;GO:0031988;GO:0042995;GO:0043005;GO:0043226;GO:0043227;GO:0043230;GO:0044421;GO:0044424;GO:0044425;GO:0044459;GO:0044464;GO:0045121;GO:0065010;GO:0070062;GO:0070161	REACT_19195	13	13	13	24.4	24.4	24.4	78.286	170.02	136130000	356	2.37818	-4.18702	1.31392	0.0651855	-0.221025	-1.31805	1.76755	-1.21012	1.0018	0.0435686	2.05696	0.618265	-3.73335	-0.290852	0.564505	-0.530472	-0.157265	-6.23969	0.583513	-1.91741	-2.91631	-1.98473	2.19364	-2.86134	2.30013	-2.56181	-0.93435	-2.32078	1.32309
+	10.7441	2.44924	P16671	P16671	Platelet glycoprotein 4	CD36	GO:0000122;GO:0001775;GO:0001817;GO:0001819;GO:0001932;GO:0001934;GO:0001952;GO:0001954;GO:0002218;GO:0002221;GO:0002224;GO:0002237;GO:0002253;GO:0002376;GO:0002474;GO:0002478;GO:0002479;GO:0002576;GO:0002682;GO:0002684;GO:0002697;GO:0002699;GO:0002700;GO:0002702;GO:0002718;GO:0002720;GO:0002755;GO:0002757;GO:0002758;GO:0002764;GO:0006355;GO:0006357;GO:0006629;GO:0006810;GO:0006869;GO:0006887;GO:…	GO:0004871;GO:0004872;GO:0005041;GO:0005488;GO:0005515;GO:0008035;GO:0008289;GO:0008329;GO:0019838;GO:0019955;GO:0030169;GO:0030228;GO:0038023;GO:0038024;GO:0050431;GO:0060089;GO:0070053;GO:0070891;GO:0070892;GO:0071813;GO:0071814	GO:0005615;GO:0005794;GO:0005886;GO:0005887;GO:0009897;GO:0009986;GO:0012506;GO:0016020;GO:0016021;GO:0016023;GO:0030139;GO:0030659;GO:0030666;GO:0030667;GO:0031090;GO:0031092;GO:0031224;GO:0031226;GO:0031410;GO:0031982;GO:0031988;GO:0043226;GO:0043227;GO:0043229;GO:0043231;GO:0044421;GO:0044422;GO:0044424;GO:0044425;GO:0044433;GO:0044444;GO:0044446;GO:0044459;GO:0044464;GO:0045121;GO:0045335	REACT_111174;REACT_116145;REACT_163679;REACT_27161;REACT_318;REACT_355210;REACT_355462;REACT_6788;REACT_8006	9	9	9	25.4	25.4	25.4	53.053	105.81	70451000	120	3.61451	-1.23476	3.10312	-0.677217	-1.50484	-1.94691	-0.46311	-3.92868	-0.25297	-1.98304	-1.45512	-3.53956	-1.45228	-0.959526	2.2493	-3.6413	-2.38712	-3.30108	-0.539309	-1.49571	3.93461	-3.31703	-2.75353	-4.01764	3.33347	-4.18769	-0.531564	-4.45996	1.50914
+	24.1768	2.4465	Q9Y2D5	Q9Y2D5	A-kinase anchor protein 2	AKAP2					31	31	31	45.4	45.4	45.4	94.659	323.31	644550000	1311	3.48477	-1.58605	2.34273	1.70702	1.73036	1.0334	2.17482	-0.793969	2.63675	0.185893	3.02723	1.05068	-0.309622	-1.5542	2.7637	0.243818	1.92437	-0.99374	2.17318	-3.3948	3.25628	1.31971	2.01221	0.673356	2.16783	-2.57377	2.14619	-2.23718	2.21562
+	14.4837	2.44556	P30613	P30613	Pyruvate kinase PKLR	PKLR	GO:0001666;GO:0005975;GO:0005996;GO:0006006;GO:0006066;GO:0006082;GO:0006090;GO:0006091;GO:0006112;GO:0006139;GO:0006163;GO:0006164;GO:0006753;GO:0006754;GO:0006807;GO:0006950;GO:0007584;GO:0008152;GO:0009058;GO:0009117;GO:0009141;GO:0009142;GO:0009144;GO:0009145;GO:0009150;GO:0009152;GO:0009165;GO:0009199;GO:0009201;GO:0009205;GO:0009206;GO:0009259;GO:0009260;GO:0009266;GO:0009408;GO:0009605;GO:…	GO:0000166;GO:0000287;GO:0003824;GO:0004743;GO:0005488;GO:0005524;GO:0016301;GO:0016740;GO:0016772;GO:0016773;GO:0017076;GO:0030554;GO:0030955;GO:0031420;GO:0032553;GO:0032555;GO:0032559;GO:0035639;GO:0043167;GO:0043169;GO:0046872	GO:0005829;GO:0031982;GO:0031988;GO:0043226;GO:0043227;GO:0043230;GO:0044421;GO:0044424;GO:0044444;GO:0044464;GO:0065010;GO:0070062	REACT_13819;REACT_1383;REACT_2122	12	10	10	29.6	26.7	26.7	61.829	44.643	36080000	74	-2.4245	-1.05243	-2.03532	-4.88584	0.477541	-1.9495	-1.00553	-2.67236	1.4147	-4.90436	-1.1689	-1.91214	-3.07986	-4.35174	1.2894	-3.10741	-2.40903	-2.67021	1.92145	3.48411	-0.274067	-4.09798	-0.655495	-1.47114	-1.07262	-5.65073	-0.0721407	-2.82194	-1.38619
+	23.1188	2.44386	Q9H8L6	Q9H8L6	Multimerin-2	MMRN2	GO:0001525;GO:0009966;GO:0009968;GO:0010594;GO:0010596;GO:0010646;GO:0010648;GO:0016525;GO:0022603;GO:0023051;GO:0023057;GO:0030334;GO:0030336;GO:0030947;GO:0030948;GO:0032502;GO:0032879;GO:0040012;GO:0040013;GO:0043535;GO:0043537;GO:0045765;GO:0048519;GO:0048523;GO:0048583;GO:0048585;GO:0048646;GO:0050789;GO:0050793;GO:0050794;GO:0051093;GO:0051239;GO:0051270;GO:0051271;GO:0065007;GO:0090049;GO:…		GO:0005604;GO:0005615;GO:0031982;GO:0031988;GO:0043226;GO:0043227;GO:0043230;GO:0044420;GO:0044421;GO:0065010;GO:0070062		23	23	23	35	35	35	104.41	323.31	168350000	633	1.99925	-3.28868	1.04731	1.99479	0.499287	-0.628342	0.645454	-1.54118	0.939276	-0.697686	0.871721	-0.900633	-1.44339	-2.69791	1.55896	0.366959	0.497356	-1.67089	1.85133	-2.07351	1.03682	0.272036	-0.189854	-2.33599	1.61759	-2.09776	-0.234342	-3.89699	0.717644
+	8.18492	2.41607	Q07507	Q07507	Dermatopontin	DPT	GO:0007155;GO:0008285;GO:0009987;GO:0016043;GO:0022610;GO:0030198;GO:0030199;GO:0042127;GO:0043062;GO:0048519;GO:0048523;GO:0050789;GO:0050794;GO:0065007;GO:0071840;GO:0071841;GO:0071842		GO:0005578;GO:0005615;GO:0031012;GO:0031982;GO:0031988;GO:0043226;GO:0043227;GO:0043230;GO:0044421;GO:0065010;GO:0070062		9	9	9	51.7	51.7	51.7	24.005	272.02	267240000	243	3.33528	4.18831	3.44639	-2.44863	1.02379	1.91562	3.58779	-5.03603	-2.63373	1.39366	1.11286	-2.39006	-1.32654	-5.16631	-0.1057	-0.10265	1.06872	-5.38308	1.79159	-2.76834	-0.16226	-0.571224	2.88881	-4.58888	0.142678	-1.90617	0.981887	-1.66094	1.84854
+	23.2726	2.39953	P07585	P07585	Decorin	DCN	GO:0000271;GO:0000272;GO:0001822;GO:0001890;GO:0002237;GO:0005975;GO:0005976;GO:0006022;GO:0006023;GO:0006024;GO:0006026;GO:0006027;GO:0006464;GO:0006790;GO:0006807;GO:0006950;GO:0007519;GO:0007568;GO:0008152;GO:0009056;GO:0009057;GO:0009058;GO:0009059;GO:0009308;GO:0009605;GO:0009607;GO:0009611;GO:0009612;GO:0009628;GO:0009653;GO:0009887;GO:0009888;GO:0009893;GO:0009894;GO:0009896;GO:0009987;GO:…	GO:0001871;GO:0005488;GO:0005539;GO:0030246;GO:0030247;GO:0050840	GO:0005576;GO:0005581;GO:0005589;GO:0005615;GO:0005775;GO:0005796;GO:0030934;GO:0031974;GO:0043202;GO:0043233;GO:0044420;GO:0044421;GO:0044422;GO:0044424;GO:0044431;GO:0044437;GO:0044444;GO:0044446;GO:0044464;GO:0070013	REACT_118572;REACT_120800;REACT_120888;REACT_120989;REACT_121408;REACT_163906;REACT_267648;REACT_267917;REACT_268113;REACT_268678;REACT_268749	22	22	21	64.6	64.6	56.8	39.746	323.31	971940000	994	2.33575	2.4051	3.64321	-0.187592	3.59427	1.00637	4.15965	-0.868264	2.12201	0.449914	3.72075	1.29167	2.13232	1.48198	3.58327	0.286274	2.63613	-0.353472	3.20764	1.27032	0.990414	-0.0683384	4.22879	2.91894	3.06971	1.15321	2.59611	0.804714	5.0476
+	13.9898	2.39009	O00592	O00592	Podocalyxin	PODXL	GO:0002064;GO:0002376;GO:0006928;GO:0007155;GO:0007162;GO:0009987;GO:0016477;GO:0022407;GO:0022408;GO:0022409;GO:0022610;GO:0030155;GO:0030334;GO:0030335;GO:0031344;GO:0032502;GO:0032530;GO:0032534;GO:0032879;GO:0033628;GO:0033630;GO:0033632;GO:0033634;GO:0035148;GO:0040011;GO:0040012;GO:0040017;GO:0044087;GO:0045785;GO:0048468;GO:0048518;GO:0048519;GO:0048522;GO:0048523;GO:0048646;GO:0048856;GO:…		GO:0001726;GO:0005615;GO:0005737;GO:0005886;GO:0005887;GO:0016020;GO:0016021;GO:0016324;GO:0030027;GO:0030175;GO:0031224;GO:0031226;GO:0031253;GO:0031528;GO:0031982;GO:0031988;GO:0042995;GO:0043226;GO:0043227;GO:0043230;GO:0044297;GO:0044421;GO:0044424;GO:0044425;GO:0044459;GO:0044463;GO:0044464;GO:0045121;GO:0065010;GO:0070062		7	7	7	19	19	19	58.635	33.395	79754000	148	3.56528	-2.92336	1.73975	2.74055	0.0876884	-1.49468	0.891375	-1.18172	1.37245	1.74383	2.84418	-1.34571	-4.8004	-3.63048	1.90874	-2.0255	1.35825	-3.0549	1.28949	-0.926852	2.07157	1.5096	0.810266	-1.51724	1.59787	-2.96227	0.80774	-3.94506	0.343388
+	15.7806	2.38739	P08572	P08572	Collagen alpha-2(IV) chain;Canstatin	COL4A2	GO:0001525;GO:0006139;GO:0006351;GO:0006807;GO:0006810;GO:0006897;GO:0006898;GO:0006935;GO:0007411;GO:0008152;GO:0009058;GO:0009059;GO:0009605;GO:0009719;GO:0009987;GO:0010033;GO:0010324;GO:0016043;GO:0016044;GO:0016070;GO:0016192;GO:0016525;GO:0022411;GO:0022603;GO:0022617;GO:0030154;GO:0030198;GO:0030574;GO:0032501;GO:0032502;GO:0032774;GO:0032963;GO:0034641;GO:0034645;GO:0035987;GO:0040011;GO:…	GO:0005198;GO:0005201	GO:0005576;GO:0005581;GO:0005587;GO:0005788;GO:0030935;GO:0031012;GO:0031974;GO:0031982;GO:0031988;GO:0043226;GO:0043227;GO:0043229;GO:0043230;GO:0043231;GO:0043233;GO:0044420;GO:0044421;GO:0044422;GO:0044424;GO:0044432;GO:0044444;GO:0044446;GO:0044464;GO:0065010;GO:0070013;GO:0070062	REACT_118779;REACT_121139;REACT_13552;REACT_150180;REACT_150268;REACT_150401;REACT_163699;REACT_163874;REACT_163906;REACT_16888;REACT_169262;REACT_18312	19	19	17	16.9	16.9	15.1	167.55	323.31	901400000	759	1.48724	0.0767117	1.79801	0.435707	1.48894	0.116699	1.19376	-0.757392	0.679199	0.382184	1.39653	0.600502	2.02825	0.317789	4.76221	3.27392	4.03041	0.528212	4.53118	0.115706	1.41447	1.15272	3.09195	1.87958	4.7819	-2.10897	2.45113	-1.84397	3.98582
+	15.8701	2.38485	O94911	O94911	ATP-binding cassette sub-family A member 8	ABCA8	GO:0006810;GO:0006869;GO:0009987;GO:0051234;GO:0055085;GO:0071702	GO:0000166;GO:0003824;GO:0005215;GO:0005488;GO:0005524;GO:0015399;GO:0015405;GO:0016462;GO:0016787;GO:0016817;GO:0016818;GO:0016820;GO:0016887;GO:0017076;GO:0017111;GO:0022804;GO:0022857;GO:0030554;GO:0032553;GO:0032555;GO:0032559;GO:0035639;GO:0042623;GO:0042626;GO:0043492	GO:0005743;GO:0005886;GO:0016020;GO:0016021;GO:0019866;GO:0031090;GO:0031224;GO:0031966;GO:0044422;GO:0044424;GO:0044425;GO:0044429;GO:0044444;GO:0044446;GO:0044464	REACT_15480	15	15	13	13.9	13.9	11.9	183.67	129.59	76929000	186	1.51801	-2.51659	1.05454	-2.64336	0.429535	0.508863	-2.5725	-4.21361	0.0322781	-1.89653	0.734617	0.265587	-1.98594	-2.25758	0.790144	-1.44613	0.743408	-2.5862	0.661535	-0.767669	0.617067	0.0401115	0.944698	0.923852	1.14318	-4.84452	-1.26659	-3.06286	0.983599
+	22.1455	2.38433	P21810	P21810	Biglycan	BGN	GO:0000271;GO:0000272;GO:0001974;GO:0005975;GO:0005976;GO:0006022;GO:0006023;GO:0006024;GO:0006026;GO:0006027;GO:0006464;GO:0006790;GO:0006807;GO:0008152;GO:0009056;GO:0009057;GO:0009058;GO:0009059;GO:0009308;GO:0009987;GO:0016043;GO:0016051;GO:0016052;GO:0018149;GO:0018193;GO:0018209;GO:0019538;GO:0019800;GO:0030198;GO:0030203;GO:0030204;GO:0030205;GO:0030206;GO:0030207;GO:0030208;GO:0032501;GO:…	GO:0001871;GO:0005198;GO:0005201;GO:0005488;GO:0005539;GO:0030246;GO:0030247;GO:0050840	GO:0005576;GO:0005578;GO:0005775;GO:0005796;GO:0005886;GO:0009986;GO:0016020;GO:0016023;GO:0030133;GO:0031012;GO:0031410;GO:0031974;GO:0031982;GO:0031988;GO:0042383;GO:0043202;GO:0043226;GO:0043227;GO:0043229;GO:0043230;GO:0043231;GO:0043233;GO:0044421;GO:0044422;GO:0044424;GO:0044431;GO:0044437;GO:0044444;GO:0044446;GO:0044464;GO:0065010;GO:0070013;GO:0070062	REACT_120800;REACT_120888;REACT_120989;REACT_121408;REACT_163906;REACT_267648;REACT_267917;REACT_268113;REACT_268678;REACT_268749	22	22	22	55.2	55.2	55.2	41.654	323.31	2068500000	1904	4.16789	2.78253	3.53942	1.47271	3.0047	2.07498	5.23721	-1.0315	3.22696	1.66928	3.5059	0.466549	0.701771	1.99382	3.56795	1.3272	2.96576	-0.679457	3.82784	1.35557	3.9751	3.06195	4.37317	3.12774	3.53447	-2.02033	2.91209	0.265207	4.41422
+	23.9136	2.38125	P12109	P12109	Collagen alpha-1(VI) chain	COL6A1	GO:0001101;GO:0001649;GO:0006461;GO:0006935;GO:0007155;GO:0007411;GO:0008152;GO:0009605;GO:0009719;GO:0009987;GO:0010033;GO:0010243;GO:0014075;GO:0016043;GO:0022411;GO:0022607;GO:0022610;GO:0022617;GO:0030154;GO:0030198;GO:0030574;GO:0032501;GO:0032502;GO:0032963;GO:0035987;GO:0040011;GO:0042221;GO:0042330;GO:0043062;GO:0043170;GO:0043200;GO:0043933;GO:0044236;GO:0044243;GO:0044259;GO:0048869;GO:…	GO:0005488;GO:0005515;GO:0019838;GO:0048407	GO:0005576;GO:0005581;GO:0005589;GO:0005765;GO:0005774;GO:0005788;GO:0005886;GO:0016020;GO:0030934;GO:0031012;GO:0031090;GO:0031974;GO:0031982;GO:0031988;GO:0032991;GO:0042383;GO:0043226;GO:0043227;GO:0043230;GO:0043233;GO:0043234;GO:0044420;GO:0044421;GO:0044422;GO:0044424;GO:0044432;GO:0044437;GO:0044444;GO:0044446;GO:0044464;GO:0065010;GO:0070013;GO:0070062	REACT_121139;REACT_13552;REACT_150180;REACT_150401;REACT_163906;REACT_16888;REACT_18312	56	56	50	59.9	59.9	56.8	108.53	323.31	5502400000	3667	3.92131	3.55688	5.53747	0.97798	5.42005	3.61333	4.6474	0.834962	4.18226	0.946301	5.01787	3.22931	4.31201	2.94649	5.7076	3.57638	5.1729	2.57903	5.75919	2.53244	2.7966	1.85347	4.13014	3.05902	5.46472	-0.164503	4.18858	2.07691	6.38581
+	19.4161	2.36933	Q9NZN3	Q9NZN3	EH domain-containing protein 3	EHD3	GO:0006461;GO:0006605;GO:0006810;GO:0006886;GO:0007596;GO:0007599;GO:0009987;GO:0015031;GO:0016043;GO:0016192;GO:0016197;GO:0022607;GO:0032456;GO:0032501;GO:0043933;GO:0045184;GO:0046907;GO:0050817;GO:0050878;GO:0051234;GO:0051259;GO:0051260;GO:0051649;GO:0065003;GO:0065007;GO:0065008;GO:0071822;GO:0071840;GO:0072661;GO:0090002;GO:0090150	GO:0000166;GO:0003676;GO:0005488;GO:0005509;GO:0005524;GO:0005525;GO:0017076;GO:0019001;GO:0030554;GO:0032553;GO:0032555;GO:0032559;GO:0032561;GO:0035639;GO:0043167;GO:0043169;GO:0046872	GO:0005634;GO:0005737;GO:0005886;GO:0005912;GO:0005924;GO:0005925;GO:0010008;GO:0016020;GO:0016023;GO:0030054;GO:0030055;GO:0030139;GO:0031090;GO:0031410;GO:0031982;GO:0031988;GO:0043226;GO:0043227;GO:0043229;GO:0043231;GO:0044422;GO:0044424;GO:0044440;GO:0044444;GO:0044446;GO:0044464;GO:0048471;GO:0055038;GO:0070161	REACT_24970	32	16	15	69.2	42.2	40.2	60.886	220.63	199500000	640	1.55275	-1.89618	1.44847	-2.8986	0.257711	-0.600052	1.19024	-3.05529	0.52194	-1.80012	1.35892	-1.42694	-0.408487	-0.534254	3.09211	0.108566	1.92396	-0.725271	2.39231	-0.395188	-0.435966	-4.1789	-0.274399	-2.4686	2.30413	-0.884897	1.69449	-0.535246	1.52616
+	16.3825	2.36675	P02549	P02549	Spectrin alpha chain, erythrocytic 1	SPTA1	GO:0001776;GO:0002260;GO:0002376;GO:0002682;GO:0002684;GO:0002694;GO:0002696;GO:0006778;GO:0006779;GO:0006807;GO:0006935;GO:0006996;GO:0007009;GO:0007010;GO:0007015;GO:0007411;GO:0008064;GO:0008152;GO:0008284;GO:0008360;GO:0009058;GO:0009605;GO:0009987;GO:0010639;GO:0016043;GO:0016044;GO:0018130;GO:0022603;GO:0022604;GO:0030029;GO:0030036;GO:0030097;GO:0030832;GO:0030833;GO:0030834;GO:0030835;GO:…	GO:0003779;GO:0005198;GO:0005200;GO:0005488;GO:0005509;GO:0005515;GO:0008092;GO:0043167;GO:0043169;GO:0046872;GO:0051015	GO:0005829;GO:0005856;GO:0008091;GO:0014731;GO:0015629;GO:0031224;GO:0031226;GO:0031235;GO:0032437;GO:0043226;GO:0043228;GO:0043229;GO:0043232;GO:0044422;GO:0044424;GO:0044425;GO:0044430;GO:0044444;GO:0044446;GO:0044448;GO:0044459;GO:0044464	REACT_18334;REACT_22266	181	181	177	77.4	77.4	75.7	280.01	323.31	3192700000	7411	2.5196	4.08341	3.06275	1.48219	4.91212	3.01348	4.52077	2.52619	5.44521	1.91187	4.11805	1.92439	1.27651	-0.573191	4.46663	1.1324	2.15113	-0.0545444	4.68531	5.92056	5.04339	1.41103	3.31602	3.21741	3.14572	-1.5108	4.29688	1.83784	3.54427
+	9.86844	2.34743	Q9BXN1	Q9BXN1	Asporin	ASPN	GO:0009888;GO:0009966;GO:0009968;GO:0010646;GO:0010648;GO:0017015;GO:0022603;GO:0023051;GO:0023057;GO:0030282;GO:0030512;GO:0031214;GO:0032502;GO:0042481;GO:0048519;GO:0048523;GO:0048583;GO:0048585;GO:0048856;GO:0050789;GO:0050793;GO:0050794;GO:0051093;GO:0051239;GO:0051241;GO:0065007;GO:0070167;GO:0070168;GO:0070170;GO:0070171;GO:0090092;GO:0090101;GO:2000026;GO:2000027	GO:0005488;GO:0005509;GO:0043167;GO:0043169;GO:0046872	GO:0005578;GO:0031012;GO:0044421	REACT_163906	16	16	16	48.9	48.9	48.9	43.417	174.53	149720000	394	0.173871	-2.82997	0.0494347	-3.49744	1.60295	-0.163561	1.86595	-3.22707	0.17412	0.971101	0.443123	0.668577	-4.44863	-0.819401	-0.0231781	-5.32969	0.901773	-3.06315	-0.757299	-2.01436	-1.2606	-2.71607	-0.0179005	-2.63528	0.0720758	-5.64191	-2.63765	-0.97769	0.907391
+	23.3504	2.34632	P04275	P04275	von Willebrand factor;von Willebrand antigen 2	VWF	GO:0001775;GO:0001889;GO:0001890;GO:0002576;GO:0006461;GO:0006810;GO:0006887;GO:0006950;GO:0007155;GO:0007596;GO:0007597;GO:0007599;GO:0008152;GO:0009611;GO:0009987;GO:0016043;GO:0016192;GO:0019538;GO:0022607;GO:0022610;GO:0030168;GO:0030198;GO:0031589;GO:0032501;GO:0032502;GO:0032940;GO:0043062;GO:0043170;GO:0043933;GO:0044238;GO:0046903;GO:0048513;GO:0048856;GO:0050817;GO:0050878;GO:0050896;GO:…	GO:0001948;GO:0002020;GO:0005102;GO:0005178;GO:0005488;GO:0005515;GO:0005518;GO:0019865;GO:0019899;GO:0032403;GO:0042802;GO:0042803;GO:0046983;GO:0047485;GO:0051087	GO:0005576;GO:0005578;GO:0005783;GO:0009897;GO:0016023;GO:0030135;GO:0030136;GO:0030141;GO:0031012;GO:0031091;GO:0031093;GO:0031410;GO:0031974;GO:0031982;GO:0031983;GO:0031988;GO:0033093;GO:0034774;GO:0043226;GO:0043227;GO:0043229;GO:0043230;GO:0043231;GO:0043233;GO:0044421;GO:0044422;GO:0044424;GO:0044425;GO:0044433;GO:0044444;GO:0044446;GO:0044459;GO:0044464;GO:0060205;GO:0065010;GO:0070062	REACT_1230;REACT_13552;REACT_15381;REACT_15443;REACT_15523;REACT_23847;REACT_318;REACT_326	62	62	54	29.4	29.4	24.5	309.26	323.31	659000000	1252	3.28112	1.27506	3.32522	2.16637	3.28262	1.76026	2.64243	0.823359	3.4644	0.238454	3.83458	-0.462063	1.71994	-1.74902	2.92924	1.36198	1.75958	-1.74969	2.96866	1.36676	3.28326	1.94603	3.08231	0.648889	2.38211	-2.74785	1.88392	-1.98632	3.10442
+	18.5834	2.33974	Q63HR2	Q63HR2	Tensin-2	TNS2	GO:0001822;GO:0007165;GO:0008152;GO:0008285;GO:0009987;GO:0014823;GO:0014850;GO:0019725;GO:0032501;GO:0032502;GO:0032963;GO:0035264;GO:0035556;GO:0040007;GO:0042127;GO:0042592;GO:0043170;GO:0044236;GO:0044259;GO:0048513;GO:0048519;GO:0048523;GO:0048856;GO:0048871;GO:0050789;GO:0050794;GO:0050896;GO:0051716;GO:0065007;GO:0065008	GO:0003824;GO:0004721;GO:0005488;GO:0005515;GO:0016787;GO:0016788;GO:0016791;GO:0019899;GO:0019900;GO:0042578;GO:0043167;GO:0043169;GO:0046872	GO:0005886;GO:0005912;GO:0005924;GO:0005925;GO:0016020;GO:0030054;GO:0030055;GO:0044464;GO:0070161		13	11	11	12.1	11.1	11.1	152.58	52.878	70361000	144	0.00972843	-1.66097	0.335979	-0.979347	-0.766661	-2.83255	-2.08199	-3.73982	-1.16547	-1.55216	-0.322479	-0.249781	-1.07051	-1.55886	0.894604	-2.05671	0.568676	-1.41707	0.289736	-2.94329	0.277634	-4.08919	1.07425	-2.42449	0.426747	-4.7754	-0.46297	-4.19316	-0.24353
+	22.6872	2.33902	Q96JY6	Q96JY6	PDZ and LIM domain protein 2	PDLIM2		GO:0005488;GO:0008270;GO:0043167;GO:0043169;GO:0046872;GO:0046914	GO:0001725;GO:0005634;GO:0005856;GO:0005912;GO:0005924;GO:0005925;GO:0015629;GO:0030054;GO:0030055;GO:0030863;GO:0030864;GO:0031982;GO:0031988;GO:0032432;GO:0042641;GO:0043226;GO:0043227;GO:0043228;GO:0043229;GO:0043230;GO:0043231;GO:0043232;GO:0044421;GO:0044422;GO:0044424;GO:0044430;GO:0044444;GO:0044446;GO:0044448;GO:0044464;GO:0065010;GO:0070062;GO:0070161		16	16	15	61.9	61.9	58.2	37.458	235.06	363470000	518	3.23595	-1.64366	2.31775	-0.315781	1.73539	0.297733	2.10067	-1.39569	2.85968	-1.64176	2.92108	0.346355	-0.222488	-0.734486	3.41566	1.36495	2.54051	-0.804129	2.61405	-1.62425	0.628664	0.420732	2.16182	1.33015	2.46013	-2.48075	1.97222	-0.54365	2.77736
+	16.5327	2.32833	P56856	P56856	Claudin-18	CLDN18	GO:0007043;GO:0007155;GO:0009987;GO:0016043;GO:0016337;GO:0016338;GO:0022607;GO:0022610;GO:0034329;GO:0034330;GO:0045216;GO:0070830;GO:0071840;GO:0071841;GO:0071842;GO:0071844	GO:0005198;GO:0005488;GO:0005515;GO:0042802	GO:0005886;GO:0005911;GO:0005923;GO:0016020;GO:0016021;GO:0030054;GO:0031224;GO:0044425;GO:0044464;GO:0070160	REACT_19373	5	5	5	19.5	19.5	19.5	27.856	49.665	22201000	97	0.494739	-4.28446	-1.61628	-3.2859	-4.21127	-3.16094	-4.23146	-3.18249	-1.63694	-5.18638	-1.7606	-4.43069	-4.21912	-4.06102	-0.284609	-3.96972	-0.27696	-4.38595	-2.27358	-3.78554	1.73819	-4.6784	-0.924242	-3.60862	-1.95709	-5.27001	-0.866414	-4.35673	0.279629
+	14.9208	2.32515	Q7Z7G0	Q7Z7G0	Target of Nesh-SH3	ABI3BP	GO:0009987;GO:0010810;GO:0010811;GO:0016043;GO:0030155;GO:0030198;GO:0043062;GO:0045785;GO:0048518;GO:0048522;GO:0050789;GO:0050794;GO:0065007;GO:0071840;GO:0071841;GO:0071842	GO:0001871;GO:0005488;GO:0005539;GO:0008201;GO:0030246;GO:0030247	GO:0005578;GO:0005614;GO:0005615;GO:0031012;GO:0044421		13	13	13	14.9	14.9	14.9	117.89	117.83	96105000	208	0.666823	-2.01856	1.27377	-0.870127	1.58999	-1.26565	1.15824	-4.95456	-0.470381	-1.63276	1.88575	-2.64044	-1.67623	-2.85527	-0.122417	-3.33999	-0.628719	-4.03405	0.792141	-1.80295	-0.726395	-1.90859	1.60386	-1.83792	0.929547	-3.6687	-0.950107	-2.03902	1.88799
+	21.5392	2.32107	Q0VF96	Q0VF96	Cingulin-like protein 1	CGNL1		GO:0003774;GO:0003824;GO:0016462;GO:0016787;GO:0016817;GO:0016818;GO:0017111	GO:0005911;GO:0005923;GO:0016459;GO:0030054;GO:0032991;GO:0043234;GO:0044422;GO:0044424;GO:0044430;GO:0044446;GO:0044464;GO:0070160		21	21	21	21.9	21.9	21.9	149.08	194.12	76150000	377	0.261497	-3.95763	-0.568361	-1.76549	-1.66558	-2.87644	-1.46651	-4.38662	-0.980894	-3.34123	0.0793266	-2.85499	-2.85516	-4.06745	0.150818	-2.61827	-0.18643	-4.40351	-1.81575	-3.77599	1.19119	-1.45331	0.313065	-1.00171	-0.636477	-4.68355	-0.691716	-2.36986	0.034996
+	20.5259	2.31876	Q15599	Q15599	Na(+)/H(+) exchange regulatory cofactor NHE-RF2	SLC9A3R2	GO:0006461;GO:0009966;GO:0009968;GO:0010646;GO:0010648;GO:0014066;GO:0014067;GO:0016043;GO:0022607;GO:0023051;GO:0023057;GO:0043933;GO:0048519;GO:0048523;GO:0048583;GO:0048585;GO:0050789;GO:0050794;GO:0065003;GO:0065007;GO:0071822;GO:0071840	GO:0005102;GO:0005488;GO:0005515;GO:0008013;GO:0008022;GO:0019899;GO:0019902	GO:0005634;GO:0005737;GO:0005886;GO:0005912;GO:0005924;GO:0005925;GO:0012505;GO:0016020;GO:0016324;GO:0030054;GO:0030055;GO:0031982;GO:0031988;GO:0043226;GO:0043227;GO:0043229;GO:0043230;GO:0043231;GO:0044421;GO:0044424;GO:0044425;GO:0044459;GO:0044464;GO:0065010;GO:0070062;GO:0070161		16	16	16	48.4	48.4	48.4	37.413	82.79	376370000	460	4.57315	-0.0667229	3.8071	2.79556	2.29901	3.181	3.26931	-0.463281	3.68906	0.568614	4.08826	0.603035	1.50052	-0.596292	4.30279	1.41696	4.03469	0.950993	3.68536	0.700488	3.35702	1.22192	3.16502	2.57881	4.03008	0.0357323	4.06195	-1.8858	3.48317
+	20.9204	2.31749	P50895	P50895	Basal cell adhesion molecule	BCAM	GO:0007155;GO:0007160;GO:0007165;GO:0009987;GO:0022610;GO:0031589;GO:0050789;GO:0050794;GO:0050896;GO:0051716;GO:0065007	GO:0004871;GO:0004872;GO:0004888;GO:0005055;GO:0005488;GO:0005515;GO:0008022;GO:0038023;GO:0043236;GO:0050840;GO:0060089	GO:0005886;GO:0005887;GO:0009897;GO:0016020;GO:0016021;GO:0031224;GO:0031226;GO:0031982;GO:0031988;GO:0043226;GO:0043227;GO:0043230;GO:0044421;GO:0044425;GO:0044459;GO:0044464;GO:0065010;GO:0070062		30	30	29	59.4	59.4	58.4	67.404	323.31	1146900000	1162	5.32474	0.487932	4.13792	3.78786	3.6524	3.49119	3.71132	2.00952	4.93385	2.47193	4.1858	0.692867	1.92318	2.06283	4.58838	2.21113	3.37481	2.24143	3.86812	0.866235	4.10883	3.47768	4.19244	2.77147	4.76557	-1.73604	3.86167	0.597294	4.10484
+	16.4039	2.31113	Q01118	Q01118	Sodium channel protein type 7 subunit alpha	SCN7A	GO:0001508;GO:0003008;GO:0003012;GO:0006810;GO:0006811;GO:0006812;GO:0006814;GO:0006873;GO:0006936;GO:0009987;GO:0015672;GO:0019228;GO:0019725;GO:0030001;GO:0032501;GO:0034220;GO:0035725;GO:0042391;GO:0042592;GO:0048878;GO:0050801;GO:0051234;GO:0055065;GO:0055067;GO:0055078;GO:0055080;GO:0055082;GO:0055085;GO:0065007;GO:0065008	GO:0005215;GO:0005216;GO:0005244;GO:0005248;GO:0005261;GO:0005272;GO:0008324;GO:0015075;GO:0015267;GO:0022803;GO:0022832;GO:0022836;GO:0022838;GO:0022843;GO:0022857;GO:0022891;GO:0022892	GO:0001518;GO:0005886;GO:0016020;GO:0032991;GO:0034702;GO:0034703;GO:0034706;GO:0043234;GO:0044425;GO:0044459;GO:0044464	REACT_22266	7	7	7	6.2	6.2	6.2	193.49	14.275	22651000	88	-0.213687	-4.47561	-1.218	-4.69731	-4.50424	-5.18909	-3.22407	-2.40305	0.01581	-3.14775	-0.493174	-4.11346	-2.62462	-3.21274	-2.04519	-2.77081	-0.328939	-4.60002	-2.88823	-4.48557	-4.14204	-5.22651	-0.1518	-1.11747	0.0552073	-4.6941	-0.698625	-2.92061	0.460043
+	12.0249	2.3013	P61952	P61952	Guanine nucleotide-binding protein G(I)/G(S)/G(O) subunit gamma-11	GNG11	GO:0006091;GO:0006112;GO:0007165;GO:0007166;GO:0007186;GO:0008152;GO:0009719;GO:0009725;GO:0009987;GO:0010033;GO:0015980;GO:0032870;GO:0033762;GO:0042221;GO:0043434;GO:0044237;GO:0044281;GO:0050789;GO:0050794;GO:0050896;GO:0051716;GO:0055114;GO:0065007;GO:0070887;GO:0071310;GO:0071375;GO:0071377;GO:0071495	GO:0003824;GO:0003924;GO:0004871;GO:0016462;GO:0016787;GO:0016817;GO:0016818;GO:0017111;GO:0060089	GO:0005834;GO:0005886;GO:0016020;GO:0019897;GO:0019898;GO:0031234;GO:0032991;GO:0043234;GO:0044424;GO:0044425;GO:0044459;GO:0044464	REACT_15457;REACT_1665;REACT_18274;REACT_18283;REACT_18339;REACT_18377;REACT_18407;REACT_19140;REACT_19145;REACT_19231;REACT_19290;REACT_19327;REACT_19333;REACT_20647;REACT_20653;REACT_21254;REACT_21384;REACT_23946;REACT_24023;REACT_263982	4	4	4	30.1	30.1	30.1	8.4807	7.5756	35148000	61	2.45259	-4.90251	0.0352173	1.68015	-0.686373	-3.95246	-0.836643	-3.58248	-0.847198	-3.72718	2.12205	-4.31856	-4.18317	-4.40655	-0.295128	-5.20594	-1.66545	-4.96648	-2.70256	-5.44503	2.48335	-0.172964	-4.04551	-4.08463	-4.6774	-4.43324	-0.440902	-4.0444	-0.83783
+	17.7169	2.28459	Q9UPQ0	Q9UPQ0	LIM and calponin homology domains-containing protein 1	LIMCH1	GO:0006996;GO:0007010;GO:0009987;GO:0016043;GO:0030029;GO:0030036;GO:0031032;GO:0071840;GO:0071841;GO:0071842	GO:0005488;GO:0008270;GO:0043167;GO:0043169;GO:0046872;GO:0046914			44	44	42	50.6	50.6	48.6	121.87	323.31	438250000	1173	2.65419	-1.23231	1.86007	3.56146	1.24513	2.06165	2.27289	-2.11806	2.67248	0.697202	2.54124	-2.06298	-0.979765	-4.31858	2.2795	0.268171	1.83185	-2.6291	1.94857	-0.626586	3.21159	0.713364	2.41471	1.45525	1.88124	-4.88738	1.92781	-1.30386	2.06395
+	16.1828	2.28395	P16157	P16157	Ankyrin-1	ANK1	GO:0006605;GO:0006778;GO:0006779;GO:0006807;GO:0006810;GO:0006811;GO:0006812;GO:0006886;GO:0006887;GO:0006888;GO:0006935;GO:0006996;GO:0007010;GO:0007163;GO:0007165;GO:0007411;GO:0008152;GO:0009058;GO:0009605;GO:0009987;GO:0010638;GO:0015031;GO:0015672;GO:0016043;GO:0016192;GO:0018130;GO:0030011;GO:0032502;GO:0032940;GO:0033013;GO:0033014;GO:0033043;GO:0034641;GO:0035088;GO:0035090;GO:0040011;GO:…	GO:0005198;GO:0005200;GO:0005488;GO:0005515;GO:0008092;GO:0008093;GO:0019899;GO:0030507;GO:0030674;GO:0051117;GO:0060090	GO:0005634;GO:0005783;GO:0005829;GO:0005856;GO:0005886;GO:0014731;GO:0016020;GO:0016323;GO:0016529;GO:0030018;GO:0030673;GO:0030863;GO:0031253;GO:0031256;GO:0031430;GO:0032589;GO:0033267;GO:0042383;GO:0043226;GO:0043227;GO:0043228;GO:0043229;GO:0043231;GO:0043232;GO:0044422;GO:0044424;GO:0044425;GO:0044444;GO:0044448;GO:0044449;GO:0044456;GO:0044459;GO:0044463;GO:0044464;GO:0045211;GO:0097060	REACT_22266;REACT_22292;REACT_22312;REACT_22329	82	82	72	57.6	57.6	53.2	206.26	323.31	1824700000	3618	2.82691	4.351	3.48587	0.768835	5.25042	3.40201	4.68873	2.8686	5.69728	1.83945	4.44486	2.54948	1.06858	-0.243473	4.91893	1.52032	2.80886	0.44215	5.19301	6.28957	4.61328	1.77464	3.53853	3.7956	3.7828	-1.25793	4.71769	2.09738	4.0104
+	13.0589	2.2835	Q15661;P20231;Q9BZJ3;A6NIE9	Q15661;P20231	Tryptase alpha/beta-1;Tryptase beta-2	TPSAB1;TPSB2	GO:0006950;GO:0006952;GO:0009987;GO:0016043;GO:0022411;GO:0022617;GO:0030198;GO:0043062;GO:0050896;GO:0071840;GO:0071841;GO:0071842;GO:0071845	GO:0003824;GO:0004175;GO:0004252;GO:0008233;GO:0008236;GO:0016787;GO:0017171;GO:0070011	GO:0005576;GO:0005615;GO:0044421	REACT_118682	16	16	14	47.3	47.3	47.3	30.515	323.31	2343400000	959	5.70045	0.361845	4.96362	3.63879	3.70443	2.82756	5.33408	3.05131	4.50296	1.08447	5.36267	3.15455	1.95852	1.489	4.30011	1.16459	4.6359	3.12881	2.85621	0.24088	4.38712	2.42336	4.35562	4.41801	4.65986	-0.255465	4.89846	-1.3368	5.23759
+	12.566	2.27888	Q969G5	Q969G5	Protein kinase C delta-binding protein	PRKCDBP	GO:0006996;GO:0007010;GO:0007623;GO:0009966;GO:0009967;GO:0009968;GO:0009987;GO:0010468;GO:0010627;GO:0010646;GO:0010647;GO:0010648;GO:0010740;GO:0010741;GO:0016043;GO:0019222;GO:0023051;GO:0023056;GO:0023057;GO:0030029;GO:0030036;GO:0030865;GO:0030866;GO:0032922;GO:0043408;GO:0043410;GO:0048511;GO:0048518;GO:0048519;GO:0048522;GO:0048523;GO:0048583;GO:0048584;GO:0048585;GO:0050789;GO:0050794;GO:…	GO:0005080;GO:0005488;GO:0005515;GO:0019899;GO:0019900;GO:0019901	GO:0005737;GO:0005901;GO:0032991;GO:0043234;GO:0044424;GO:0044425;GO:0044459;GO:0044464;GO:0045121		8	8	8	34.9	34.9	34.9	27.701	116.15	105990000	196	3.11752	-4.05343	2.12451	1.19356	2.1559	-1.1627	1.82811	-2.3365	2.41232	-1.3588	2.04615	-1.71615	-1.20178	-2.65827	0.60416	-2.45811	-1.59672	-3.65185	1.36367	-0.636952	3.39547	-1.45935	2.10341	-3.42482	1.91942	-3.64388	-0.232696	-2.59486	1.74207
+	15.2374	2.27275	P00915	P00915	Carbonic anhydrase 1	CA1	GO:0006730;GO:0006810;GO:0006811;GO:0006820;GO:0008152;GO:0009987;GO:0015698;GO:0015701;GO:0015711;GO:0044237;GO:0044281;GO:0051234	GO:0003824;GO:0004064;GO:0004089;GO:0005488;GO:0008270;GO:0016787;GO:0016788;GO:0016829;GO:0016835;GO:0016836;GO:0043167;GO:0043169;GO:0046872;GO:0046914;GO:0052689	GO:0005829;GO:0031982;GO:0031988;GO:0043226;GO:0043227;GO:0043230;GO:0044421;GO:0044424;GO:0044444;GO:0044464;GO:0065010;GO:0070062	REACT_121123;REACT_121329;REACT_121380	19	19	19	69.3	69.3	69.3	28.87	323.31	7762700000	2516	4.74976	5.50567	4.97676	2.29129	6.87788	4.29129	6.2777	3.14416	5.99369	3.38448	4.69069	2.82043	2.68055	0.997229	6.10983	2.62185	4.74611	2.55077	6.76856	8.35264	6.06963	2.82036	5.30751	5.47064	5.48482	0.527395	6.55387	4.21073	5.88476
+	21.6751	2.26496	P12110	P12110	Collagen alpha-2(VI) chain	COL6A2	GO:0006461;GO:0006935;GO:0007155;GO:0007411;GO:0008152;GO:0009605;GO:0009743;GO:0009746;GO:0009749;GO:0009987;GO:0010033;GO:0016043;GO:0022411;GO:0022607;GO:0022610;GO:0022617;GO:0030198;GO:0030574;GO:0032501;GO:0032963;GO:0034284;GO:0040011;GO:0042221;GO:0042330;GO:0043062;GO:0043170;GO:0043933;GO:0044236;GO:0044243;GO:0044259;GO:0050896;GO:0051259;GO:0051291;GO:0065003;GO:0070206;GO:0070208;GO:…		GO:0005576;GO:0005578;GO:0005581;GO:0005615;GO:0005788;GO:0005886;GO:0016020;GO:0031012;GO:0031974;GO:0031982;GO:0031988;GO:0032991;GO:0042383;GO:0043226;GO:0043227;GO:0043230;GO:0043233;GO:0043234;GO:0044420;GO:0044421;GO:0044422;GO:0044424;GO:0044432;GO:0044444;GO:0044446;GO:0044464;GO:0065010;GO:0070013;GO:0070062	REACT_121139;REACT_13552;REACT_150180;REACT_150401;REACT_163906;REACT_16888;REACT_18312	36	36	36	34.6	34.6	34.6	108.58	323.31	3296900000	2360	3.06059	2.60287	4.94576	0.502974	4.63445	2.99233	4.04887	-0.624169	3.32363	-0.0251379	4.25347	2.96572	3.69349	2.6737	4.86597	3.09547	4.37268	1.96976	4.88573	1.77332	2.43567	0.90275	3.04292	2.23229	4.86154	-0.74349	3.78365	0.191921	5.74542
+	3.89351	2.2569	Q86Y13	Q86Y13	E3 ubiquitin-protein ligase DZIP3	DZIP3	GO:0000209;GO:0006464;GO:0008152;GO:0009987;GO:0016567;GO:0019538;GO:0032446;GO:0043170;GO:0043412;GO:0044237;GO:0044238;GO:0044260;GO:0044267;GO:0070647	GO:0003676;GO:0003723;GO:0003824;GO:0004842;GO:0005488;GO:0005515;GO:0008270;GO:0016874;GO:0016879;GO:0016881;GO:0019787;GO:0019899;GO:0019902;GO:0031593;GO:0032182;GO:0043130;GO:0043167;GO:0043169;GO:0046872;GO:0046914	GO:0005737;GO:0044424;GO:0044464	REACT_75842	1	1	1	1.5	1.5	1.5	138.6	1.7164	311090000	87	3.17785	4.21864	2.92933	4.08787	4.53255	4.8299	3.97497	2.60047	0.659912	2.26851	3.64313	2.17811	-4.23109	0.110901	4.90223	1.34021	1.60095	-0.319386	4.93857	-5.12228	1.98395	-4.8993	-0.216337	1.97814	3.21427	-2.31365	4.28516	1.47471	3.65334
+	8.61755	2.25173	P53420	P53420	Collagen alpha-4(IV) chain	COL4A4	GO:0006935;GO:0007411;GO:0008152;GO:0009605;GO:0009987;GO:0016043;GO:0022411;GO:0022617;GO:0030198;GO:0030574;GO:0032501;GO:0032836;GO:0032963;GO:0040011;GO:0042221;GO:0042330;GO:0043062;GO:0043170;GO:0044236;GO:0044243;GO:0044259;GO:0050896;GO:0071840;GO:0071841;GO:0071842;GO:0071845	GO:0005198;GO:0005201	GO:0005576;GO:0005581;GO:0005587;GO:0005605;GO:0005788;GO:0030935;GO:0031974;GO:0043233;GO:0044420;GO:0044421;GO:0044422;GO:0044424;GO:0044432;GO:0044444;GO:0044446;GO:0044464;GO:0070013	REACT_118779;REACT_121139;REACT_13552;REACT_150180;REACT_150268;REACT_150401;REACT_163874;REACT_163906;REACT_16888;REACT_169262;REACT_18312	9	9	8	9.5	9.5	8.9	164.04	52.623	125540000	121	0.626397	-1.16045	0.951117	-1.13018	-0.0200214	0.483154	0.568264	-0.970904	2.49425	-4.33798	-0.0965691	-1.76612	-1.88298	-2.50028	3.34043	0.985125	1.38517	-1.94795	2.52636	-2.21118	2.68924	4.32863	-0.20643	1.52004	2.47007	-2.1254	0.477849	0.216108	1.46419
+	15.8276	2.24774	P11277	P11277	Spectrin beta chain, erythrocytic	SPTB	GO:0006778;GO:0006779;GO:0006807;GO:0006935;GO:0007009;GO:0007411;GO:0008064;GO:0008152;GO:0009058;GO:0009605;GO:0009987;GO:0010639;GO:0016043;GO:0016044;GO:0018130;GO:0030097;GO:0030832;GO:0030833;GO:0030834;GO:0030835;GO:0030837;GO:0031333;GO:0032271;GO:0032272;GO:0032502;GO:0032535;GO:0032956;GO:0032970;GO:0033013;GO:0033014;GO:0033043;GO:0034641;GO:0040011;GO:0042221;GO:0042330;GO:0043242;GO:…	GO:0003779;GO:0005198;GO:0005200;GO:0005488;GO:0005515;GO:0008092;GO:0030506;GO:0051015	GO:0005737;GO:0005829;GO:0005856;GO:0008091;GO:0009986;GO:0014731;GO:0015629;GO:0031224;GO:0031226;GO:0031235;GO:0032991;GO:0043226;GO:0043228;GO:0043229;GO:0043232;GO:0043234;GO:0044422;GO:0044424;GO:0044425;GO:0044430;GO:0044444;GO:0044446;GO:0044448;GO:0044459;GO:0044464	REACT_18334;REACT_22266	151	143	139	74.6	70.8	68.9	246.47	323.31	2563800000	6453	1.61397	3.31936	2.23289	0.34218	4.14677	2.35383	3.64456	1.60562	4.51871	0.774652	3.27536	0.978479	0.620775	-1.04442	3.77265	0.430285	1.53195	-0.60301	3.98788	5.14659	3.66611	1.15026	2.52695	2.45594	2.49477	-1.92897	3.54858	1.07618	2.80815
+	17.5699	2.24646	P02730	P02730	Band 3 anion transport protein	SLC4A1	GO:0006810;GO:0006811;GO:0006820;GO:0006821;GO:0006873;GO:0006885;GO:0008152;GO:0009987;GO:0015698;GO:0015701;GO:0015711;GO:0019725;GO:0030003;GO:0030004;GO:0030641;GO:0042592;GO:0044281;GO:0048878;GO:0050801;GO:0051234;GO:0051453;GO:0055067;GO:0055080;GO:0055082;GO:0055085;GO:0065007;GO:0065008	GO:0005215;GO:0005452;GO:0005488;GO:0005515;GO:0008092;GO:0008509;GO:0015075;GO:0015103;GO:0015106;GO:0015108;GO:0015291;GO:0015297;GO:0015300;GO:0015301;GO:0022804;GO:0022857;GO:0022891;GO:0022892;GO:0030506;GO:0042802;GO:0042803;GO:0043495;GO:0046983	GO:0005856;GO:0005886;GO:0005887;GO:0016020;GO:0016021;GO:0016323;GO:0030018;GO:0030863;GO:0031224;GO:0031226;GO:0031982;GO:0031988;GO:0043226;GO:0043227;GO:0043228;GO:0043229;GO:0043230;GO:0043232;GO:0044421;GO:0044422;GO:0044424;GO:0044425;GO:0044444;GO:0044448;GO:0044449;GO:0044459;GO:0044464;GO:0065010;GO:0070062;GO:0072562	REACT_121329;REACT_121380;REACT_19298	37	37	37	64.2	64.2	64.2	101.79	323.31	2710900000	2604	2.72663	4.13423	3.45581	0.942064	5.07954	3.30219	4.60966	2.74192	5.28603	1.82329	4.26868	2.18962	1.46844	-0.052557	4.76797	1.55037	2.72749	0.814171	5.14015	5.96243	3.06489	1.90129	3.32041	3.61957	3.71888	-0.942524	4.59106	1.79152	3.90225
+	25.7236	2.2407	Q9HBL0	Q9HBL0	Tensin-1	TNS1	GO:0001667;GO:0006928;GO:0007044;GO:0009987;GO:0010761;GO:0016043;GO:0016477;GO:0022607;GO:0034329;GO:0034330;GO:0040011;GO:0048870;GO:0071840;GO:0071841;GO:0071842;GO:0071844		GO:0005737;GO:0005856;GO:0005912;GO:0005924;GO:0005925;GO:0009986;GO:0030054;GO:0030055;GO:0043226;GO:0043228;GO:0043229;GO:0043232;GO:0044424;GO:0044464;GO:0070161		61	61	58	52.3	52.3	50.1	185.7	323.31	1349000000	2701	3.88095	1.08466	3.64792	2.49023	2.94745	1.63884	3.45207	0.159879	3.67094	0.981444	3.9192	1.81374	1.3124	0.441963	3.8253	1.64559	3.22482	-0.477633	3.53259	0.565158	4.35247	1.81859	4.04532	2.54629	3.86192	-2.63503	3.20053	-0.406532	3.69936
+	8.71113	2.22962	Q6B0K9	Q6B0K9	Hemoglobin subunit mu	HBM		GO:0005215;GO:0005344;GO:0005488;GO:0005506;GO:0019825;GO:0020037;GO:0022892;GO:0043167;GO:0043169;GO:0046872;GO:0046906;GO:0046914	GO:0005833;GO:0031982;GO:0031988;GO:0032991;GO:0043226;GO:0043227;GO:0043230;GO:0043234;GO:0044421;GO:0044424;GO:0044444;GO:0044445;GO:0044464;GO:0065010;GO:0070062		5	5	4	60.3	60.3	45.4	15.618	136.88	68828000	203	0.53765	-0.321964	0.38644	2.17469	2.23748	0.682333	1.9823	0.307811	2.60495	-0.882102	0.81456	-0.087122	-3.3988	-4.81538	1.77633	-2.8541	-1.46113	-3.7639	2.25649	2.6758	1.43377	1.34557	-1.65908	0.011302	2.2148	-3.79175	0.866035	-3.56237	0.397629
+	10.1877	2.19877	Q13753	Q13753	Laminin subunit gamma-2	LAMC2	GO:0007044;GO:0007155;GO:0008544;GO:0009888;GO:0009987;GO:0016043;GO:0022411;GO:0022607;GO:0022610;GO:0022617;GO:0030198;GO:0031581;GO:0032502;GO:0034329;GO:0034330;GO:0043062;GO:0048856;GO:0071840;GO:0071841;GO:0071842;GO:0071844;GO:0071845	GO:0001871;GO:0005488;GO:0005539;GO:0008201;GO:0030246;GO:0030247	GO:0005576;GO:0005607;GO:0005610;GO:0005615;GO:0005938;GO:0016020;GO:0032991;GO:0043234;GO:0043256;GO:0044420;GO:0044421;GO:0044424;GO:0044425;GO:0044444;GO:0044459;GO:0044464;GO:0048471	REACT_118572;REACT_150180;REACT_150268;REACT_163874;REACT_169262;REACT_20537	37	37	34	38.7	38.7	34.6	130.97	323.31	445680000	1069	-0.0607805	1.96524	-0.62668	-1.77749	-1.955	-3.2906	-1.44287	-2.92846	-0.50654	-4.85277	0.682013	-2.22405	-2.10137	0.35894	2.44465	0.986074	1.69724	0.581163	2.36198	-0.158994	0.813311	1.08294	0.974819	0.76369	2.14544	-3.68365	0.336329	-0.605707	1.82035
+	5.87004	2.19292	P78539	P78539	Sushi repeat-containing protein SRPX	SRPX	GO:0001845;GO:0006906;GO:0006914;GO:0006944;GO:0006950;GO:0006996;GO:0007155;GO:0008152;GO:0008285;GO:0009056;GO:0009987;GO:0016043;GO:0016044;GO:0016050;GO:0022607;GO:0022610;GO:0033554;GO:0034976;GO:0042127;GO:0044237;GO:0044248;GO:0048284;GO:0048519;GO:0048523;GO:0050789;GO:0050794;GO:0050896;GO:0051716;GO:0060244;GO:0061024;GO:0061025;GO:0065007;GO:0070925;GO:0071840;GO:0071841;GO:0071842;GO:…		GO:0005773;GO:0005776;GO:0005783;GO:0009986;GO:0016020;GO:0043226;GO:0043227;GO:0043229;GO:0043231;GO:0044424;GO:0044444;GO:0044464		12	12	12	26.7	26.7	26.7	51.571	133	107630000	284	-2.34913	-1.91281	-3.3199	-3.95723	-4.57691	-2.83432	-3.1261	-5.51949	-4.117	-4.19198	-5.91279	-3.41788	-4.64992	-5.03959	-3.00121	-3.32923	0.837034	-5.04134	1.03047	1.6346	-5.50683	-4.29128	1.22015	-4.12177	1.6926	-6.60662	-1.67947	-6.30448	1.35746
+	12.4413	2.18875	O75636	O75636	Ficolin-3	FCN3	GO:0001867;GO:0002252;GO:0002253;GO:0002376;GO:0002682;GO:0002684;GO:0006910;GO:0006950;GO:0006952;GO:0006955;GO:0006956;GO:0006959;GO:0008037;GO:0008152;GO:0009607;GO:0009615;GO:0009987;GO:0019538;GO:0040012;GO:0043170;GO:0043654;GO:0043900;GO:0043903;GO:0044238;GO:0045087;GO:0046596;GO:0046597;GO:0048518;GO:0048519;GO:0048525;GO:0048583;GO:0048584;GO:0050776;GO:0050778;GO:0050789;GO:0050792;GO:…	GO:0003823;GO:0005488;GO:0030246	GO:0005576;GO:0005581;GO:0044420;GO:0044421;GO:0072562	REACT_163810;REACT_7964;REACT_8024	8	8	7	43.1	43.1	36.5	32.903	55.142	46853000	118	-0.950906	-0.37821	-1.60548	-4.33459	1.55103	-1.0702	0.697515	-2.32437	0.170055	-3.56218	-0.0309906	-2.04794	-0.92083	-3.0193	-0.39352	-4.02147	-2.68588	-1.49599	1.78477	2.49888	-0.792538	-1.40999	-0.902138	-2.18926	-1.48716	-2.86148	1.30966	-5.02747	1.5039
+	13.5889	2.18563	Q9BX66	Q9BX66	Sorbin and SH3 domain-containing protein 1	SORBS1	GO:0003008;GO:0003012;GO:0005979;GO:0006109;GO:0006810;GO:0006936;GO:0006996;GO:0007010;GO:0007015;GO:0007044;GO:0007155;GO:0007160;GO:0007165;GO:0007166;GO:0007167;GO:0007169;GO:0008286;GO:0008643;GO:0008645;GO:0009719;GO:0009725;GO:0009889;GO:0009891;GO:0009893;GO:0009966;GO:0009967;GO:0009987;GO:0010033;GO:0010556;GO:0010557;GO:0010604;GO:0010646;GO:0010647;GO:0010675;GO:0010676;GO:0010827;GO:…	GO:0003779;GO:0005070;GO:0005102;GO:0005158;GO:0005488;GO:0005515;GO:0008092;GO:0030674;GO:0032403;GO:0035591;GO:0060090	GO:0001725;GO:0005634;GO:0005654;GO:0005737;GO:0005813;GO:0005815;GO:0005829;GO:0005886;GO:0005911;GO:0005912;GO:0005913;GO:0005915;GO:0005924;GO:0005925;GO:0016020;GO:0016363;GO:0030054;GO:0030055;GO:0032432;GO:0042641;GO:0043226;GO:0043227;GO:0043228;GO:0043229;GO:0043231;GO:0043232;GO:0044422;GO:0044424;GO:0044425;GO:0044428;GO:0044430;GO:0044444;GO:0044446;GO:0044464;GO:0045121;GO:0070161	REACT_20558	28	28	27	28.6	28.6	27.8	142.51	201.91	224360000	530	1.15735	-3.33877	1.22911	-0.407303	0.896221	-0.620087	0.833778	-3.4136	1.08167	-3.09231	0.910206	-1.12233	-2.06577	-2.9039	1.41866	-0.360638	1.22626	-3.6611	0.726183	-4.65322	2.56613	0.432371	2.55589	-0.221759	2.02599	-4.88461	-0.47302	-2.32042	0.629478
+	17.9749	2.18425	P12821	P12821	Angiotensin-converting enzyme;Angiotensin-converting enzyme, soluble form	ACE	GO:0001822;GO:0001932;GO:0001974;GO:0001990;GO:0002003;GO:0002005;GO:0002016;GO:0002019;GO:0002252;GO:0002376;GO:0002443;GO:0002444;GO:0002446;GO:0002474;GO:0003008;GO:0003013;GO:0003015;GO:0003044;GO:0003073;GO:0003081;GO:0006518;GO:0006810;GO:0006869;GO:0007276;GO:0007283;GO:0008152;GO:0008217;GO:0008283;GO:0009056;GO:0009057;GO:0009100;GO:0009893;GO:0009987;GO:0010604;GO:0010817;GO:0014910;GO:…	GO:0001664;GO:0003779;GO:0003824;GO:0004175;GO:0004180;GO:0005102;GO:0005488;GO:0005515;GO:0008092;GO:0008144;GO:0008233;GO:0008236;GO:0008237;GO:0008238;GO:0008240;GO:0008241;GO:0008270;GO:0016787;GO:0017171;GO:0019899;GO:0019900;GO:0019901;GO:0031404;GO:0031434;GO:0031711;GO:0043167;GO:0043168;GO:0043169;GO:0046872;GO:0046914;GO:0051019;GO:0070011	GO:0000323;GO:0005576;GO:0005615;GO:0005764;GO:0005768;GO:0005773;GO:0005886;GO:0009897;GO:0016020;GO:0016021;GO:0031224;GO:0031982;GO:0031988;GO:0043226;GO:0043227;GO:0043229;GO:0043230;GO:0043231;GO:0044421;GO:0044424;GO:0044425;GO:0044444;GO:0044459;GO:0044464;GO:0065010;GO:0070062	REACT_147707	26	26	24	29.6	29.6	27.4	149.71	299.18	281690000	813	2.63089	-0.121984	2.24807	1.43881	0.126116	-0.574232	0.857828	-1.37049	1.26577	0.843892	2.47061	0.277136	0.553461	-1.76863	1.73018	-0.445869	0.955589	-1.41794	1.52452	-0.983834	1.84982	1.19851	0.785723	-0.394877	2.31259	-3.9359	1.30567	-2.67652	1.34755
+	10.696	2.16615	P28289;Q9NZQ9	P28289	Tropomodulin-1	TMOD1	GO:0003008;GO:0003012;GO:0006928;GO:0006936;GO:0006996;GO:0007010;GO:0007015;GO:0007610;GO:0007626;GO:0008064;GO:0008344;GO:0009987;GO:0010639;GO:0010927;GO:0016043;GO:0022607;GO:0030029;GO:0030036;GO:0030048;GO:0030049;GO:0030239;GO:0030534;GO:0030832;GO:0030833;GO:0030834;GO:0030835;GO:0030837;GO:0031032;GO:0031333;GO:0032271;GO:0032272;GO:0032501;GO:0032502;GO:0032535;GO:0032956;GO:0032970;GO:…	GO:0005488;GO:0005515;GO:0005523;GO:0008092	GO:0005829;GO:0005856;GO:0005865;GO:0016020;GO:0030863;GO:0043226;GO:0043228;GO:0043229;GO:0043232;GO:0044422;GO:0044424;GO:0044430;GO:0044444;GO:0044446;GO:0044448;GO:0044449;GO:0044464	REACT_16969	12	12	12	50.1	50.1	50.1	40.569	99.513	68609000	202	1.40531	-1.06849	0.978426	-1.09693	1.77217	0.0387936	1.68299	-2.10653	2.0758	-2.52	1.95118	-2.3883	-3.74826	-2.78337	0.633829	-3.72847	-2.55372	-5.96513	1.01644	2.00858	-1.24615	-1.42902	-1.31906	-1.51645	-0.900279	-4.41363	-2.2465	-3.6464	0.81196
+	6.37789	2.15805	Q9NZD4	Q9NZD4	Alpha-hemoglobin-stabilizing protein	AHSP	GO:0006457;GO:0008152;GO:0009987;GO:0010468;GO:0010608;GO:0019222;GO:0019538;GO:0020027;GO:0030097;GO:0031647;GO:0032502;GO:0043170;GO:0044237;GO:0044238;GO:0044260;GO:0044267;GO:0048513;GO:0048534;GO:0048856;GO:0050789;GO:0050821;GO:0060255;GO:0065007;GO:0065008	GO:0005488;GO:0005515;GO:0030492;GO:0051082	GO:0005833;GO:0032991;GO:0043234;GO:0044424;GO:0044444;GO:0044445;GO:0044464		6	6	6	52.9	52.9	52.9	11.84	105.87	120810000	271	-0.0768576	-0.929638	1.64857	2.83763	2.35934	0.494814	2.52638	0.759471	3.02559	-1.13001	1.11586	-1.64209	-2.68371	-2.65407	2.0545	-2.97382	-3.76729	-1.91776	1.47471	3.06433	2.85733	0.626902	0.370846	-0.450686	-3.69068	-5.04226	1.33828	-4.87299	-0.0254688
+	8.92116	2.1453	O75781	O75781	Paralemmin-1	PALM	GO:0006140;GO:0006605;GO:0006810;GO:0006886;GO:0006928;GO:0006996;GO:0007010;GO:0007194;GO:0008277;GO:0008360;GO:0009628;GO:0009889;GO:0009966;GO:0009968;GO:0009987;GO:0010646;GO:0010648;GO:0010975;GO:0015031;GO:0016043;GO:0019219;GO:0019222;GO:0021700;GO:0022603;GO:0022604;GO:0023051;GO:0023057;GO:0030799;GO:0030802;GO:0030808;GO:0030814;GO:0030817;GO:0031279;GO:0031280;GO:0031323;GO:0031326;GO:…		GO:0005634;GO:0005654;GO:0005886;GO:0005887;GO:0016020;GO:0016021;GO:0016023;GO:0016323;GO:0016327;GO:0030424;GO:0031224;GO:0031226;GO:0031253;GO:0031256;GO:0031410;GO:0031527;GO:0031982;GO:0031988;GO:0032589;GO:0032590;GO:0032591;GO:0042995;GO:0043005;GO:0043226;GO:0043227;GO:0043229;GO:0043231;GO:0044422;GO:0044424;GO:0044425;GO:0044428;GO:0044444;GO:0044446;GO:0044459;GO:0044463;GO:0044464		13	13	13	39.8	39.8	39.8	42.075	228.37	360290000	233	3.85462	5.36078	1.08077	2.50831	3.13355	2.69386	3.26434	0.682321	3.05313	1.97709	2.47993	0.74786	5.46286	0.409851	2.56312	-0.660105	1.89886	-2.767	1.28568	-3.37344	5.23631	0.73807	3.10122	-1.21311	1.66975	-0.88871	2.54688	-3.66308	3.76403
+	17.7247	2.12842	Q9HCM4	Q9HCM4	Band 4.1-like protein 5	EPB41L5	GO:0000578;GO:0000902;GO:0000904;GO:0001701;GO:0001837;GO:0001839;GO:0001952;GO:0001954;GO:0002009;GO:0003383;GO:0006931;GO:0006996;GO:0007010;GO:0007155;GO:0007162;GO:0007389;GO:0007398;GO:0007492;GO:0007498;GO:0007509;GO:0009653;GO:0009719;GO:0009790;GO:0009792;GO:0009798;GO:0009826;GO:0009880;GO:0009888;GO:0009948;GO:0009987;GO:0010033;GO:0010468;GO:0010608;GO:0010632;GO:0010634;GO:0010717;GO:…		GO:0005634;GO:0005737;GO:0005856;GO:0005886;GO:0005912;GO:0005924;GO:0005925;GO:0016020;GO:0019898;GO:0030054;GO:0030055;GO:0031253;GO:0031256;GO:0032587;GO:0043226;GO:0043227;GO:0043228;GO:0043229;GO:0043231;GO:0043232;GO:0044424;GO:0044425;GO:0044459;GO:0044463;GO:0044464;GO:0070161		11	11	11	22.9	22.9	22.9	81.855	104.13	68489000	256	0.971152	-2.42305	-0.19397	-2.69339	-1.20275	-2.26291	-0.764265	-1.55254	0.162886	-2.48878	0.535686	-3.09439	-2.04824	-3.72917	1.10381	-2.37013	0.1609	-3.36064	0.232679	-2.32786	0.311586	-1.86291	0.293489	-0.716226	0.991096	-1.66537	0.812608	-3.90026	0.994379
+	6.67801	2.12712	O96009	O96009	Napsin-A	NAPSA	GO:0001894;GO:0006508;GO:0008152;GO:0009056;GO:0009057;GO:0019538;GO:0030163;GO:0033619;GO:0042592;GO:0043129;GO:0043170;GO:0044238;GO:0048875;GO:0048878;GO:0060249;GO:0065007;GO:0065008	GO:0003824;GO:0004175;GO:0004190;GO:0008233;GO:0016787;GO:0070001;GO:0070011	GO:0000323;GO:0005615;GO:0005764;GO:0005773;GO:0031982;GO:0031988;GO:0043226;GO:0043227;GO:0043229;GO:0043230;GO:0043231;GO:0044421;GO:0044424;GO:0044444;GO:0044464;GO:0065010;GO:0070062		14	14	14	46	46	46	45.386	323.31	1926500000	851	4.57546	0.695326	3.27026	4.80852	3.10119	4.99166	3.99942	-3.96844	4.01009	-3.03196	3.34826	-1.06665	2.02153	-3.94456	1.9535	2.47984	4.95564	-1.7905	4.34377	1.86795	5.14083	4.80449	4.859	5.53438	4.86387	-4.59192	4.94081	-2.56613	2.75792
+	9.67413	2.11913	Q5S007	Q5S007	Leucine-rich repeat serine/threonine-protein kinase 2	LRRK2	GO:0000165;GO:0000186;GO:0000187;GO:0001932;GO:0001933;GO:0001934;GO:0003254;GO:0006140;GO:0006464;GO:0006468;GO:0006793;GO:0006796;GO:0006810;GO:0006873;GO:0006897;GO:0006914;GO:0006928;GO:0006950;GO:0006979;GO:0006996;GO:0007005;GO:0007165;GO:0007243;GO:0007264;GO:0007528;GO:0007610;GO:0007626;GO:0008104;GO:0008152;GO:0008219;GO:0008277;GO:0008340;GO:0009056;GO:0009653;GO:0009892;GO:0009893;GO:…	GO:0000149;GO:0000166;GO:0001948;GO:0003779;GO:0003824;GO:0003924;GO:0004672;GO:0004674;GO:0004708;GO:0004712;GO:0005096;GO:0005488;GO:0005515;GO:0005524;GO:0005525;GO:0008047;GO:0008092;GO:0015631;GO:0016301;GO:0016462;GO:0016740;GO:0016772;GO:0016773;GO:0016787;GO:0016817;GO:0016818;GO:0017016;GO:0017048;GO:0017075;GO:0017076;GO:0017111;GO:0019001;GO:0019899;GO:0019905;GO:0030234;GO:0030276;GO:…	GO:0000323;GO:0005615;GO:0005737;GO:0005739;GO:0005741;GO:0005743;GO:0005759;GO:0005764;GO:0005768;GO:0005773;GO:0005783;GO:0005794;GO:0005802;GO:0005829;GO:0005886;GO:0012506;GO:0016020;GO:0016234;GO:0019866;GO:0019867;GO:0030054;GO:0030424;GO:0030425;GO:0030659;GO:0030662;GO:0030665;GO:0030672;GO:0031090;GO:0031410;GO:0031966;GO:0031968;GO:0031974;GO:0031982;GO:0031988;GO:0032473;GO:0032838;GO:…		45	45	39	25.6	25.6	22	286.1	194.74	310800000	306	3.37668	1.30083	3.63996	-1.16331	2.1598	0.530827	2.14442	-0.318416	1.38139	1.33768	2.1025	-2.0745	4.60416	-0.620916	2.91584	3.42757	3.41615	-0.428152	2.58989	0.708428	4.39023	0.963156	2.97268	3.58712	2.63315	-2.19811	2.70164	0.790638	2.94972
+	25.6794	2.11318	P14543	P14543	Nidogen-1	NID1	GO:0007155;GO:0007160;GO:0009987;GO:0010810;GO:0010811;GO:0016043;GO:0022411;GO:0022610;GO:0022617;GO:0030155;GO:0030198;GO:0031589;GO:0032836;GO:0043062;GO:0045785;GO:0048518;GO:0048522;GO:0050789;GO:0050794;GO:0065007;GO:0071711;GO:0071840;GO:0071841;GO:0071842;GO:0071845	GO:0001948;GO:0005488;GO:0005509;GO:0005515;GO:0005518;GO:0043167;GO:0043169;GO:0043236;GO:0043394;GO:0046872;GO:0050840	GO:0005576;GO:0005604;GO:0005605;GO:0031012;GO:0031982;GO:0031988;GO:0043226;GO:0043227;GO:0043230;GO:0044420;GO:0044421;GO:0044464;GO:0065010;GO:0070062;GO:0071944	REACT_118572;REACT_169262	43	43	40	47.4	47.4	44.1	136.38	323.31	1148200000	1814	2.5564	1.78036	2.4337	0.537239	2.16853	1.38592	2.17551	0.257817	2.71883	0.232739	2.23207	1.06781	1.17387	0.0314865	3.77564	2.27688	2.66002	0.903769	3.75346	0.044631	0.970274	0.691347	2.42047	1.93987	3.35821	-1.32407	2.20526	-1.0737	3.42471
+	15.2371	2.1089	P50225	P50225	Sulfotransferase 1A1	SULT1A1	GO:0006066;GO:0006139;GO:0006163;GO:0006576;GO:0006584;GO:0006629;GO:0006725;GO:0006753;GO:0006790;GO:0006805;GO:0006807;GO:0008152;GO:0008202;GO:0008210;GO:0009117;GO:0009308;GO:0009698;GO:0009712;GO:0009812;GO:0009987;GO:0010817;GO:0018958;GO:0019748;GO:0033865;GO:0033875;GO:0034032;GO:0034035;GO:0034311;GO:0034641;GO:0034754;GO:0042445;GO:0042537;GO:0044106;GO:0044237;GO:0044238;GO:0044281;GO:…	GO:0003824;GO:0004062;GO:0008146;GO:0016740;GO:0016782;GO:0047894;GO:0050294	GO:0005829;GO:0044424;GO:0044444;GO:0044464	REACT_6913	16	9	6	68.1	45.8	26.8	34.165	110.3	230500000	485	1.9178	-1.36051	2.92605	2.69057	2.22185	0.753643	2.66871	-2.04544	1.93299	0.765668	1.6491	-1.03651	0.558218	-2.50754	2.88724	1.38305	1.6699	-1.73658	1.40989	-3.82406	2.80756	1.46636	1.67721	0.906514	2.21148	-4.3875	1.57489	-1.97371	1.2127
+	20.8902	2.1047	O60504	O60504	Vinexin	SORBS3	GO:0000122;GO:0003008;GO:0003012;GO:0006355;GO:0006357;GO:0006936;GO:0006996;GO:0007010;GO:0007015;GO:0007155;GO:0009889;GO:0009890;GO:0009892;GO:0009966;GO:0009967;GO:0009987;GO:0010468;GO:0010556;GO:0010558;GO:0010605;GO:0010627;GO:0010629;GO:0010638;GO:0010646;GO:0010647;GO:0010740;GO:0016043;GO:0019219;GO:0019222;GO:0022610;GO:0023051;GO:0023056;GO:0030029;GO:0030036;GO:0031323;GO:0031324;GO:…	GO:0005198;GO:0005200;GO:0005488;GO:0005515;GO:0008092;GO:0017166	GO:0005634;GO:0005829;GO:0005856;GO:0005912;GO:0005924;GO:0005925;GO:0030054;GO:0030055;GO:0043226;GO:0043227;GO:0043228;GO:0043229;GO:0043231;GO:0043232;GO:0044424;GO:0044444;GO:0044464;GO:0070161	REACT_20558	18	18	18	37.6	37.6	37.6	75.34	81.41	203620000	358	1.17867	-1.33348	1.32021	-0.898355	0.957756	-1.29989	1.66074	-2.18484	1.65163	-2.28059	1.66384	-0.715298	-0.244064	-0.567387	2.09621	-0.0871944	1.26281	-2.14931	2.01901	-1.57139	1.40295	-0.967667	1.62265	-0.0109587	2.40743	-2.91239	1.52063	-2.47832	1.98385
+	6.49816	2.10402	P13686	P13686	Tartrate-resistant acid phosphatase type 5	ACP5	GO:0001817;GO:0001818;GO:0001894;GO:0002237;GO:0006766;GO:0006767;GO:0006771;GO:0006807;GO:0006950;GO:0006952;GO:0008152;GO:0009607;GO:0009617;GO:0009653;GO:0009889;GO:0009890;GO:0009892;GO:0009987;GO:0010033;GO:0019222;GO:0031323;GO:0031324;GO:0031326;GO:0031327;GO:0031347;GO:0031348;GO:0032101;GO:0032102;GO:0032496;GO:0032502;GO:0032651;GO:0032652;GO:0032655;GO:0032680;GO:0032691;GO:0032692;GO:…	GO:0003824;GO:0003993;GO:0005488;GO:0005506;GO:0008198;GO:0008199;GO:0016787;GO:0016788;GO:0016791;GO:0042578;GO:0043167;GO:0043169;GO:0046872;GO:0046914	GO:0000323;GO:0005764;GO:0005773;GO:0005829;GO:0016021;GO:0031224;GO:0031982;GO:0031988;GO:0043226;GO:0043227;GO:0043229;GO:0043230;GO:0043231;GO:0044421;GO:0044424;GO:0044425;GO:0044444;GO:0044464;GO:0065010;GO:0070062	REACT_11070	8	8	7	41.5	41.5	33.5	36.598	258.66	1118100000	257	-2.17171	4.06638	0.237362	1.13856	3.77094	0.829699	3.69231	0.521316	3.39358	1.19965	3.43473	0.0630741	4.09548	2.17158	5.61436	4.42499	6.69967	1.52736	7.84841	0.49359	0.347765	5.3187	1.14599	1.71653	6.85884	0.370224	6.27092	-1.43003	4.88341
+	17.5114	2.1017	P0DMN0;P0DMM9	P0DMN0;P0DMM9	Sulfotransferase 1A4;Sulfotransferase 1A3	SULT1A4;SULT1A3	GO:0006066;GO:0006139;GO:0006163;GO:0006576;GO:0006584;GO:0006629;GO:0006725;GO:0006753;GO:0006790;GO:0006805;GO:0006807;GO:0006950;GO:0006984;GO:0006986;GO:0007165;GO:0008152;GO:0008202;GO:0009117;GO:0009308;GO:0009698;GO:0009712;GO:0009812;GO:0009987;GO:0010033;GO:0018958;GO:0019538;GO:0019748;GO:0030968;GO:0033554;GO:0033865;GO:0033875;GO:0034032;GO:0034035;GO:0034311;GO:0034620;GO:0034641;GO:…	GO:0003824;GO:0004062;GO:0008146;GO:0016740;GO:0016782	GO:0005737;GO:0005829;GO:0044424;GO:0044444;GO:0044464	REACT_18273;REACT_6913	17	17	9	75.3	75.3	45.1	34.196	323.31	346810000	836	3.34663	-1.02485	2.61741	3.88555	2.44194	0.368515	1.65444	-2.26465	1.85106	-0.43819	2.37313	-2.38569	0.329538	-3.0432	2.53601	0.29962	1.52657	-2.08866	1.76778	0.3103	1.97201	1.28978	1.44811	-0.164435	2.41485	-2.59181	1.52684	-1.65296	1.97924
+	5.46159	2.10165	P02655	P02655	Apolipoprotein C-II;Proapolipoprotein C-II	APOC2	GO:0001523;GO:0006629;GO:0006720;GO:0006721;GO:0006810;GO:0006869;GO:0007165;GO:0007602;GO:0007603;GO:0008152;GO:0009056;GO:0009314;GO:0009416;GO:0009581;GO:0009582;GO:0009583;GO:0009584;GO:0009605;GO:0009628;GO:0009889;GO:0009891;GO:0009892;GO:0009893;GO:0009894;GO:0009896;GO:0009987;GO:0010517;GO:0010518;GO:0010565;GO:0010896;GO:0010898;GO:0010901;GO:0010902;GO:0010915;GO:0010916;GO:0010984;GO:…	GO:0004857;GO:0005488;GO:0005515;GO:0008047;GO:0008289;GO:0016004;GO:0019899;GO:0030234;GO:0042802;GO:0042803;GO:0043274;GO:0046983;GO:0055102;GO:0060229;GO:0060230	GO:0005576;GO:0005615;GO:0005768;GO:0005769;GO:0031982;GO:0031988;GO:0032991;GO:0032994;GO:0034358;GO:0034361;GO:0034362;GO:0034363;GO:0034364;GO:0034366;GO:0034385;GO:0042627;GO:0043226;GO:0043227;GO:0043229;GO:0043230;GO:0043231;GO:0044421;GO:0044424;GO:0044444;GO:0044464;GO:0065010;GO:0070062	REACT_13621;REACT_24968;REACT_6841	7	7	7	59.4	59.4	59.4	11.284	187.14	270400000	252	3.20297	3.27885	2.95052	1.6797	6.11172	4.52757	4.39831	1.97006	4.16142	0.610745	4.18896	4.18159	1.28873	-1.97934	3.56747	-0.107803	0.933378	-4.92222	4.21632	5.53363	1.25752	-0.167994	1.26999	-0.396779	3.07433	-1.91519	3.77948	-2.26415	4.51781
+	12.3416	2.09853	O00423	O00423	Echinoderm microtubule-associated protein-like 1	EML1	GO:0000226;GO:0002244;GO:0006996;GO:0007010;GO:0007017;GO:0007051;GO:0007052;GO:0007405;GO:0007420;GO:0008283;GO:0009987;GO:0016043;GO:0022402;GO:0030154;GO:0032502;GO:0048513;GO:0048856;GO:0048869;GO:0061351;GO:0071840;GO:0071841;GO:0071842	GO:0005488;GO:0005509;GO:0005515;GO:0008017;GO:0008092;GO:0015631;GO:0043167;GO:0043169;GO:0046872	GO:0005829;GO:0005874;GO:0005875;GO:0032991;GO:0043234;GO:0044422;GO:0044424;GO:0044430;GO:0044444;GO:0044446;GO:0044464;GO:0048471		12	11	11	17.3	16.1	16.1	89.86	14.882	32513000	80	0.0488615	-3.59491	-0.612719	-3.75111	-4.12518	-1.15941	-1.63101	-1.79723	-1.6972	-2.50695	0.32395	-1.39345	-1.44711	-4.20935	1.83005	-1.44395	0.719898	-4.00705	0.945822	-4.1391	-0.533314	-4.30358	-4.61378	-3.35317	0.0981092	-4.94823	-0.260377	-3.79409	1.19271
+	6.27323	2.09412	P48061	P48061	Stromal cell-derived factor 1;SDF-1-beta(3-72);SDF-1-alpha(3-67)	CXCL12	GO:0001558;GO:0001569;GO:0001666;GO:0001667;GO:0001763;GO:0001764;GO:0001775;GO:0001936;GO:0001938;GO:0002009;GO:0002376;GO:0002682;GO:0002684;GO:0002685;GO:0002687;GO:0002688;GO:0002690;GO:0003006;GO:0003008;GO:0003013;GO:0006873;GO:0006874;GO:0006875;GO:0006928;GO:0006935;GO:0006950;GO:0006955;GO:0007155;GO:0007165;GO:0007166;GO:0007186;GO:0007281;GO:0007389;GO:0007411;GO:0007610;GO:0007626;GO:…	GO:0001664;GO:0005102;GO:0005125;GO:0005126;GO:0005488;GO:0005515;GO:0008009;GO:0042379;GO:0045236	GO:0005576;GO:0005615;GO:0009897;GO:0031982;GO:0031988;GO:0043226;GO:0043227;GO:0043230;GO:0044421;GO:0044425;GO:0044459;GO:0044464;GO:0065010;GO:0070062	REACT_116022;REACT_15344;REACT_19231	4	4	4	34.4	34.4	34.4	10.666	30.545	105350000	213	-1.41741	1.33587	-2.05805	-3.77934	-3.41132	-2.33268	-0.444168	-5.23688	-1.84161	-2.34295	-1.40269	-0.981966	-2.56839	-3.29852	1.38826	0.136616	2.22444	-4.85405	3.0376	3.2105	-2.08554	-3.67977	1.58493	-5.07194	1.61883	-4.47239	-0.576091	-3.3516	0.706854
+	15.6751	2.08556	O43301	O43301	Heat shock 70 kDa protein 12A	HSPA12A		GO:0000166;GO:0005488;GO:0005524;GO:0017076;GO:0030554;GO:0032553;GO:0032555;GO:0032559;GO:0035639	GO:0031982;GO:0031988;GO:0043226;GO:0043227;GO:0043230;GO:0044421;GO:0065010;GO:0070062	REACT_264487	11	10	10	23.3	21.5	21.5	74.977	41.014	42861000	141	-2.05838	-1.93707	-0.199608	-4.04279	1.49029	-3.64165	-0.102365	-3.88689	-1.33705	-2.97617	0.225483	-3.39811	-2.12141	-2.97875	-0.973858	-3.27993	-0.598505	-4.07285	-2.46904	-3.20842	-1.23173	-3.71963	-0.320169	-2.55912	-2.39423	-5.64849	-0.600648	-3.48762	1.00528
+	21.5708	2.07986	P16284	P16284	Platelet endothelial cell adhesion molecule	PECAM1	GO:0001775;GO:0002376;GO:0002576;GO:0006810;GO:0006887;GO:0006897;GO:0006909;GO:0006928;GO:0007155;GO:0007165;GO:0007596;GO:0007599;GO:0008037;GO:0009888;GO:0009987;GO:0010324;GO:0016043;GO:0016044;GO:0016192;GO:0016477;GO:0022610;GO:0030168;GO:0030198;GO:0032501;GO:0032502;GO:0032940;GO:0040011;GO:0043062;GO:0046903;GO:0048856;GO:0048870;GO:0050789;GO:0050794;GO:0050817;GO:0050878;GO:0050896;GO:…		GO:0005615;GO:0005886;GO:0012506;GO:0016020;GO:0016021;GO:0030054;GO:0030659;GO:0030667;GO:0031090;GO:0031092;GO:0031224;GO:0031982;GO:0031988;GO:0043226;GO:0043227;GO:0043230;GO:0044421;GO:0044422;GO:0044424;GO:0044425;GO:0044433;GO:0044444;GO:0044446;GO:0044464;GO:0065010;GO:0070062	REACT_12051;REACT_12519;REACT_13552;REACT_23879;REACT_318	27	27	25	39.2	39.2	36.6	82.521	194.24	362680000	776	2.89233	-0.807667	2.37856	1.19051	2.38455	0.940487	2.096	-0.379676	2.5823	0.140904	2.30025	0.765181	0.762182	-0.261993	3.05974	0.930735	2.13284	-1.57091	3.11057	-0.205035	2.08155	1.11939	0.927797	-0.201432	2.09554	-2.25944	2.03181	-1.1424	2.13947
+	8.81901	2.07663	P35247	P35247	Pulmonary surfactant-associated protein D	SFTPD	GO:0001817;GO:0001894;GO:0002376;GO:0002682;GO:0002683;GO:0002694;GO:0002695;GO:0006810;GO:0006897;GO:0006898;GO:0006928;GO:0006935;GO:0006950;GO:0006952;GO:0006955;GO:0007585;GO:0008152;GO:0008285;GO:0009605;GO:0009607;GO:0009617;GO:0009889;GO:0009890;GO:0009892;GO:0009987;GO:0010324;GO:0010556;GO:0010558;GO:0010605;GO:0016043;GO:0016044;GO:0016192;GO:0016477;GO:0019222;GO:0030100;GO:0030595;GO:…	GO:0005488;GO:0030246	GO:0000323;GO:0005576;GO:0005578;GO:0005581;GO:0005615;GO:0005764;GO:0005773;GO:0016023;GO:0030139;GO:0031012;GO:0031410;GO:0031982;GO:0031988;GO:0043226;GO:0043227;GO:0043229;GO:0043231;GO:0044420;GO:0044421;GO:0044424;GO:0044444;GO:0044464	REACT_23916;REACT_6894;REACT_8005	10	10	9	31.7	31.7	27.7	37.728	105.81	77802000	225	1.38411	-3.17975	1.81361	5.15777	1.23901	-1.73183	0.793755	-4.85647	-0.524401	-4.63391	0.182489	-3.27092	-0.197849	-6.21231	-0.156918	-0.525122	-1.43276	-3.98231	-0.279617	-1.66958	-0.242308	-0.169441	1.00778	2.29241	-0.108125	-4.85371	-0.936772	-3.62485	1.67268
+	17.3339	2.06419	P02671	P02671	Fibrinogen alpha chain;Fibrinopeptide A;Fibrinogen alpha chain	FGA	GO:0001775;GO:0002376;GO:0002576;GO:0002791;GO:0002793;GO:0006461;GO:0006810;GO:0006887;GO:0006950;GO:0006952;GO:0006955;GO:0006959;GO:0007155;GO:0007160;GO:0007165;GO:0007596;GO:0007599;GO:0008152;GO:0009607;GO:0009617;GO:0009892;GO:0009966;GO:0009967;GO:0009987;GO:0010035;GO:0010038;GO:0010470;GO:0010605;GO:0010627;GO:0010646;GO:0010647;GO:0010740;GO:0010941;GO:0016043;GO:0016192;GO:0016337;GO:…	GO:0005198	GO:0005576;GO:0005577;GO:0005615;GO:0005886;GO:0005938;GO:0009897;GO:0009986;GO:0016020;GO:0016023;GO:0030141;GO:0031091;GO:0031093;GO:0031410;GO:0031974;GO:0031982;GO:0031983;GO:0031988;GO:0032991;GO:0034774;GO:0043226;GO:0043227;GO:0043229;GO:0043230;GO:0043231;GO:0043233;GO:0043234;GO:0044421;GO:0044422;GO:0044424;GO:0044425;GO:0044433;GO:0044444;GO:0044446;GO:0044459;GO:0044464;GO:0060205;GO:…	REACT_13552;REACT_1439;REACT_15381;REACT_15443;REACT_15523;REACT_318;REACT_75925	57	57	52	62.5	62.5	58.3	94.972	323.31	7622800000	3917	3.6046	5.13861	4.40128	2.46118	5.48727	3.513	5.69847	3.08574	4.91314	2.77852	5.25484	2.92342	4.78599	2.94238	6.37684	4.1065	4.81046	2.58942	7.05561	7.10705	5.61039	1.36852	4.92776	4.3269	3.8771	0.110109	5.91174	2.92838	5.80334
+	20.9852	2.05531	P12111	P12111	Collagen alpha-3(VI) chain	COL6A3	GO:0006935;GO:0007155;GO:0007411;GO:0007517;GO:0008152;GO:0009605;GO:0009987;GO:0016043;GO:0022411;GO:0022610;GO:0022617;GO:0030198;GO:0030574;GO:0032501;GO:0032502;GO:0032963;GO:0040011;GO:0042221;GO:0042330;GO:0043062;GO:0043170;GO:0044236;GO:0044243;GO:0044259;GO:0048513;GO:0048856;GO:0050896;GO:0061061;GO:0071840;GO:0071841;GO:0071842;GO:0071845	GO:0004857;GO:0004866;GO:0004867;GO:0030234;GO:0030414;GO:0061134;GO:0061135	GO:0005576;GO:0005578;GO:0005581;GO:0005589;GO:0005615;GO:0005788;GO:0005886;GO:0016020;GO:0030934;GO:0031012;GO:0031974;GO:0031982;GO:0031988;GO:0042383;GO:0043226;GO:0043227;GO:0043230;GO:0043233;GO:0044420;GO:0044421;GO:0044422;GO:0044424;GO:0044432;GO:0044444;GO:0044446;GO:0044464;GO:0065010;GO:0070013;GO:0070062	REACT_121139;REACT_13552;REACT_150180;REACT_150401;REACT_163906;REACT_16888;REACT_18312	176	176	175	60.2	60.2	60	343.67	323.31	15366000000	11100	4.01614	3.77638	5.33012	1.41989	5.40126	3.46898	4.67383	0.856944	3.68987	2.18375	4.83697	3.7836	4.31428	3.3039	5.14683	3.39869	4.61125	2.67266	5.13074	2.55801	2.51228	1.76135	4.11868	2.9843	5.22614	-0.483492	3.9396	1.86565	6.24394
+	18.5354	2.05469	Q8WWI1	Q8WWI1	LIM domain only protein 7	LMO7	GO:0006464;GO:0008152;GO:0009987;GO:0016567;GO:0019538;GO:0023051;GO:0030155;GO:0032446;GO:0043170;GO:0043412;GO:0044237;GO:0044238;GO:0044260;GO:0044267;GO:0050789;GO:0050794;GO:0065007;GO:0070647	GO:0003824;GO:0004842;GO:0005488;GO:0008270;GO:0016874;GO:0016879;GO:0016881;GO:0019787;GO:0043167;GO:0043169;GO:0046872;GO:0046914	GO:0000151;GO:0005634;GO:0005737;GO:0005912;GO:0005924;GO:0005925;GO:0030054;GO:0030055;GO:0032991;GO:0043226;GO:0043227;GO:0043229;GO:0043231;GO:0043234;GO:0044424;GO:0044464;GO:0070161		54	54	54	37.4	37.4	37.4	192.69	323.31	688680000	1989	2.65998	-1.88608	1.48746	0.904497	0.639709	0.210182	1.20332	-1.35557	2.05524	-2.5997	2.25655	-1.21693	0.801214	-1.56023	2.80101	1.21326	2.25187	-1.98698	1.9709	-0.972882	2.90483	0.973377	2.08779	1.44115	1.91754	-2.59231	2.32616	-2.1442	2.65572
+	5.05221	2.0543	P02724	P02724	Glycophorin-A	GYPA	GO:0006996;GO:0007010;GO:0007016;GO:0009987;GO:0016043;GO:0032507;GO:0045185;GO:0047484;GO:0048583;GO:0050789;GO:0051235;GO:0051651;GO:0065007;GO:0065008;GO:0071840;GO:0071841;GO:0071842;GO:0080134	GO:0001618;GO:0004872;GO:0005488;GO:0005515;GO:0042802	GO:0005886;GO:0005887;GO:0009897;GO:0016020;GO:0016021;GO:0031224;GO:0031226;GO:0031982;GO:0031988;GO:0043226;GO:0043227;GO:0043230;GO:0044421;GO:0044425;GO:0044459;GO:0044464;GO:0065010;GO:0070062		3	3	3	44.7	44.7	44.7	16.331	323.31	281860000	220	3.02984	3.20385	3.05016	4.37923	4.51947	3.10751	4.12908	2.70511	2.03753	2.77028	3.79511	2.33318	0.212141	-3.88226	3.68137	0.622585	-0.431734	-0.654228	4.23898	5.09475	-3.61273	3.67049	-1.29608	3.26528	3.08556	-2.09659	3.67985	-4.4167	2.97856
+	10.1568	2.04894	P10643	P10643	Complement component C7	C7	GO:0002252;GO:0002253;GO:0002376;GO:0002673;GO:0002682;GO:0002684;GO:0002697;GO:0002920;GO:0006873;GO:0006875;GO:0006883;GO:0006950;GO:0006952;GO:0006955;GO:0006956;GO:0006957;GO:0006958;GO:0006959;GO:0008152;GO:0008219;GO:0009987;GO:0010468;GO:0016265;GO:0019222;GO:0019538;GO:0019725;GO:0019835;GO:0030003;GO:0030004;GO:0030449;GO:0031347;GO:0032101;GO:0042592;GO:0043170;GO:0044238;GO:0045087;GO:…		GO:0005576;GO:0005579;GO:0031982;GO:0031988;GO:0032991;GO:0043226;GO:0043227;GO:0043230;GO:0043234;GO:0044421;GO:0044425;GO:0044459;GO:0044464;GO:0046930;GO:0065010;GO:0070062	REACT_118707;REACT_8028	34	34	25	51.5	51.5	33.3	93.517	135.58	150670000	388	0.137427	2.62446	-1.27653	-3.39789	0.636036	-1.54587	0.585871	-3.89593	-0.307301	-2.29529	0.805687	-2.44917	-0.146187	-3.84076	0.222694	-3.40106	0.292149	-3.76592	0.534235	3.76909	1.44966	-3.41918	0.437695	-0.00670338	-0.320388	-5.08316	0.691518	-3.51817	1.75784
+	12.4142	2.0373	P98172	P98172	Ephrin-B1	EFNB1	GO:0001667;GO:0001755;GO:0002682;GO:0002684;GO:0002694;GO:0002696;GO:0006928;GO:0006935;GO:0007154;GO:0007155;GO:0007165;GO:0007166;GO:0007167;GO:0007169;GO:0007267;GO:0007389;GO:0007411;GO:0008284;GO:0009605;GO:0009880;GO:0009987;GO:0016477;GO:0022610;GO:0023052;GO:0032502;GO:0032944;GO:0032946;GO:0040011;GO:0042102;GO:0042127;GO:0042129;GO:0042221;GO:0042330;GO:0048013;GO:0048518;GO:0048522;GO:…	GO:0005102;GO:0005488;GO:0005515;GO:0046875	GO:0005634;GO:0005737;GO:0005886;GO:0005887;GO:0016020;GO:0016021;GO:0031224;GO:0031226;GO:0031982;GO:0031988;GO:0043226;GO:0043227;GO:0043229;GO:0043230;GO:0043231;GO:0044421;GO:0044424;GO:0044425;GO:0044459;GO:0044464;GO:0045121;GO:0045202;GO:0065010;GO:0070062	REACT_263952;REACT_264047;REACT_264068;REACT_264198	9	9	9	34.7	34.7	34.7	38.006	95.082	47421000	134	1.65875	-1.78489	-0.498755	0.115227	-0.268887	-2.24522	-0.0305119	0.130412	0.363478	-2.8352	-0.225994	-1.30828	-0.588465	-0.805426	0.797548	-2.81578	-0.325373	-2.52266	-0.697048	-3.45741	2.14279	-0.835243	-0.0777531	-3.66335	0.593873	-0.337315	-0.87507	-2.09839	-0.1068
+	8.69812	2.03672	Q6UXI9	Q6UXI9	Nephronectin	NPNT	GO:0001657;GO:0001658;GO:0001763;GO:0002009;GO:0006355;GO:0006357;GO:0006937;GO:0006940;GO:0007155;GO:0007160;GO:0009653;GO:0009889;GO:0009891;GO:0009893;GO:0009966;GO:0009967;GO:0009987;GO:0010033;GO:0010468;GO:0010556;GO:0010557;GO:0010604;GO:0010627;GO:0010628;GO:0010646;GO:0010647;GO:0010692;GO:0010694;GO:0010740;GO:0010810;GO:0010811;GO:0010921;GO:0010922;GO:0016043;GO:0016337;GO:0017015;GO:…	GO:0005102;GO:0005178;GO:0005488;GO:0005509;GO:0005515;GO:0032403;GO:0043167;GO:0043169;GO:0046872	GO:0005576;GO:0005578;GO:0005604;GO:0008305;GO:0030485;GO:0031012;GO:0031982;GO:0031988;GO:0032991;GO:0034678;GO:0043226;GO:0043227;GO:0043228;GO:0043229;GO:0043230;GO:0043232;GO:0043234;GO:0043235;GO:0043292;GO:0044420;GO:0044421;GO:0044422;GO:0044424;GO:0044425;GO:0044444;GO:0044449;GO:0044459;GO:0044464;GO:0065010;GO:0070062		13	13	12	27.8	27.8	24.8	61.906	42.757	95662000	144	-2.95392	-5.43409	-2.27756	-1.4333	-3.33115	-4.38941	-2.36386	-4.37434	-3.09364	-3.48084	-1.8584	-4.37942	-4.04108	-4.74805	0.0434914	-0.831682	-1.74217	-2.77715	1.0449	-1.97125	-1.21982	-2.72035	-3.58133	-3.34111	1.30545	-4.81151	-1.15267	-6.25791	1.4183
+	6.00722	2.02428	P02775	P02775	Platelet basic protein;Connective tissue-activating peptide III;TC-2;Connective tissue-activating peptide III(1-81);Beta-thromboglobulin;Neutrophil-activating peptide 2(74);Neutrophil-activating peptide 2(73);Neutrophil-activating peptide 2;TC-1;Neutrophil-activating peptide 2(1-66);Neutrophil-activating peptide 2(1-63)	PPBP	GO:0001775;GO:0002237;GO:0002376;GO:0002523;GO:0002576;GO:0002682;GO:0002684;GO:0002685;GO:0002687;GO:0002688;GO:0002690;GO:0006810;GO:0006887;GO:0006928;GO:0006935;GO:0006950;GO:0006952;GO:0006954;GO:0006955;GO:0007165;GO:0007166;GO:0007186;GO:0007596;GO:0007599;GO:0008643;GO:0008645;GO:0009605;GO:0009607;GO:0009611;GO:0009617;GO:0009987;GO:0010033;GO:0015749;GO:0015758;GO:0016192;GO:0016477;GO:…	GO:0001664;GO:0005102;GO:0005125;GO:0005126;GO:0005215;GO:0005355;GO:0005488;GO:0005515;GO:0008009;GO:0015144;GO:0015145;GO:0015149;GO:0022857;GO:0022891;GO:0022892;GO:0042379;GO:0045236;GO:0051119	GO:0005576;GO:0005615;GO:0031093;GO:0031974;GO:0031983;GO:0034774;GO:0043233;GO:0044421;GO:0044422;GO:0044424;GO:0044433;GO:0044444;GO:0044446;GO:0044464;GO:0060205	REACT_15344;REACT_19231;REACT_318	6	6	6	39.8	39.8	39.8	13.894	41.981	78840000	156	0.285768	-0.281866	-0.558186	1.71488	-0.63452	-2.47432	3.268	0.353652	2.44236	0.535705	3.31868	-0.609383	-2.21703	-2.80057	-0.253586	-1.88903	-0.712254	-3.86366	1.59289	3.51299	0.676861	-1.3941	-4.54296	-3.54469	-0.927806	-4.68935	-1.68896	-1.16988	0.040905
+	18.695	2.01278	Q9NVD7	Q9NVD7	Alpha-parvin	PARVA	GO:0000902;GO:0000904;GO:0001525;GO:0002040;GO:0003148;GO:0006928;GO:0006935;GO:0006996;GO:0007010;GO:0007155;GO:0007163;GO:0008360;GO:0009605;GO:0009653;GO:0009987;GO:0014812;GO:0014909;GO:0016043;GO:0016337;GO:0016477;GO:0022603;GO:0022604;GO:0022607;GO:0022610;GO:0030029;GO:0030030;GO:0030036;GO:0031532;GO:0031589;GO:0032502;GO:0032989;GO:0032990;GO:0034113;GO:0034329;GO:0034330;GO:0034446;GO:…		GO:0005737;GO:0005829;GO:0005856;GO:0005886;GO:0005912;GO:0005924;GO:0005925;GO:0015629;GO:0016020;GO:0030018;GO:0030054;GO:0030055;GO:0043226;GO:0043228;GO:0043229;GO:0043232;GO:0044422;GO:0044424;GO:0044444;GO:0044449;GO:0044464;GO:0070161	REACT_20580;REACT_20617;REACT_20649	19	19	17	59.4	59.4	57.3	42.243	323.31	346880000	760	2.31581	-1.85828	2.57899	-2.65331	2.51692	0.180832	2.87722	-1.61225	1.9954	-0.708283	2.8127	0.389837	-0.149683	-0.105148	2.73824	0.651197	1.94376	-0.249887	2.41693	-0.84467	2.09086	-1.08692	2.71817	1.71392	2.697	-0.875305	2.19771	0.403751	2.80414
+	10.4667	2.00426	Q08174	Q08174	Protocadherin-1	PCDH1	GO:0007154;GO:0007155;GO:0007156;GO:0007267;GO:0007399;GO:0009987;GO:0016337;GO:0022610;GO:0023052;GO:0032502;GO:0048731;GO:0048856	GO:0005488;GO:0005509;GO:0043167;GO:0043169;GO:0046872	GO:0005886;GO:0005887;GO:0005911;GO:0016020;GO:0016021;GO:0030054;GO:0031224;GO:0031226;GO:0044425;GO:0044459;GO:0044464		11	11	11	16.7	16.7	16.7	114.74	198.13	96262000	214	1.91927	-0.605446	1.11284	1.8755	-1.09145	0.633842	-0.622896	-2.75855	0.695974	-1.7305	1.04323	-2.14045	-2.06078	-2.62838	2.11329	-1.47574	0.840326	-4.06786	1.18279	-2.08316	1.53276	1.29934	-1.29096	-0.596324	1.32298	-2.78999	0.647168	-3.47806	0.991299
+	8.60697	2.00309	Q9UBX5	Q9UBX5	Fibulin-5	FBLN5	GO:0001558;GO:0006810;GO:0007155;GO:0007160;GO:0008104;GO:0009987;GO:0016043;GO:0019222;GO:0022607;GO:0022610;GO:0030198;GO:0031323;GO:0031589;GO:0033036;GO:0034394;GO:0034613;GO:0040008;GO:0043062;GO:0046903;GO:0048251;GO:0048583;GO:0050789;GO:0050794;GO:0051128;GO:0051179;GO:0051234;GO:0051641;GO:0065007;GO:0070727;GO:0071840;GO:0071841;GO:0071842;GO:0071844;GO:0080134;GO:0080135;GO:0085029;GO:…	GO:0005102;GO:0005178;GO:0005488;GO:0005509;GO:0005515;GO:0008022;GO:0032403;GO:0042802;GO:0042803;GO:0043167;GO:0043169;GO:0046872;GO:0046983	GO:0005576;GO:0005578;GO:0005615;GO:0031012;GO:0031982;GO:0031988;GO:0043226;GO:0043227;GO:0043230;GO:0044420;GO:0044421;GO:0065010;GO:0070062;GO:0071953	REACT_150331;REACT_150366	14	14	13	38.4	38.4	37.1	50.18	98.827	397790000	435	3.43846	1.87748	-0.405731	-0.660509	2.67111	2.16212	4.13644	0.911046	2.71196	-0.227014	2.43581	-1.06917	-2.38891	0.00793648	1.88301	-4.10365	1.40748	-3.68529	2.51024	-0.2275	1.5727	1.25239	2.58261	2.25085	3.31618	-3.02855	2.34057	-0.319338	3.17134
+	11.1195	2.00214	P37840	P37840	Alpha-synuclein	SNCA	GO:0000122;GO:0001504;GO:0001505;GO:0001774;GO:0001775;GO:0001919;GO:0001921;GO:0001932;GO:0001933;GO:0001934;GO:0001956;GO:0002237;GO:0002274;GO:0002376;GO:0002682;GO:0002694;GO:0006066;GO:0006082;GO:0006091;GO:0006109;GO:0006355;GO:0006357;GO:0006576;GO:0006584;GO:0006629;GO:0006631;GO:0006638;GO:0006644;GO:0006725;GO:0006807;GO:0006810;GO:0006836;GO:0006873;GO:0006897;GO:0006898;GO:0006919;GO:…	GO:0000287;GO:0000975;GO:0001067;GO:0003676;GO:0003677;GO:0003824;GO:0004857;GO:0004866;GO:0004869;GO:0005488;GO:0005506;GO:0005507;GO:0005509;GO:0005515;GO:0005543;GO:0008092;GO:0008198;GO:0008270;GO:0008289;GO:0015631;GO:0016491;GO:0019894;GO:0030234;GO:0030414;GO:0030544;GO:0031072;GO:0042393;GO:0042802;GO:0043014;GO:0043027;GO:0043028;GO:0043167;GO:0043169;GO:0044212;GO:0045502;GO:0046872;GO:…	GO:0000323;GO:0005576;GO:0005615;GO:0005634;GO:0005640;GO:0005737;GO:0005739;GO:0005764;GO:0005773;GO:0005783;GO:0005791;GO:0005794;GO:0005829;GO:0005840;GO:0005856;GO:0005886;GO:0005938;GO:0008021;GO:0012506;GO:0015629;GO:0016020;GO:0016023;GO:0016234;GO:0019867;GO:0030054;GO:0030135;GO:0030136;GO:0030424;GO:0030426;GO:0030427;GO:0030529;GO:0030659;GO:0031090;GO:0031410;GO:0031965;GO:0031968;GO:…	REACT_75925	8	8	7	54.3	54.3	46.4	14.46	310.35	776050000	727	3.33877	4.16807	3.14723	3.28426	4.85495	2.78763	4.32196	2.88286	5.09597	2.20289	3.94544	2.01173	1.38078	0.19091	4.08747	0.853251	2.1693	0.878237	4.17894	5.60056	4.19503	2.74449	2.80149	3.33731	2.90106	-1.69128	3.70736	3.23509	3.40384
+	10.0823	1.99673	Q9Y281	Q9Y281	Cofilin-2	CFL2	GO:0006996;GO:0007010;GO:0007015;GO:0008064;GO:0008154;GO:0009987;GO:0010638;GO:0010769;GO:0010975;GO:0016043;GO:0019725;GO:0022411;GO:0022603;GO:0022604;GO:0030029;GO:0030036;GO:0030042;GO:0030832;GO:0030834;GO:0030836;GO:0031032;GO:0031344;GO:0032535;GO:0032956;GO:0032970;GO:0032984;GO:0033043;GO:0034621;GO:0034623;GO:0042592;GO:0043241;GO:0043243;GO:0043244;GO:0043624;GO:0043933;GO:0045214;GO:…		GO:0005615;GO:0005856;GO:0015629;GO:0016363;GO:0031674;GO:0031982;GO:0031988;GO:0043226;GO:0043227;GO:0043228;GO:0043229;GO:0043230;GO:0043232;GO:0044421;GO:0044422;GO:0044424;GO:0044428;GO:0044444;GO:0044446;GO:0044449;GO:0044464;GO:0065010;GO:0070062		12	5	4	62	36.7	31.9	18.736	88.957	91971000	168	1.35763	0.0986156	1.70341	-5.01801	-0.237194	-0.856783	2.30527	-0.220908	1.18371	-0.146873	2.26346	-0.0239925	0.521723	-0.389513	2.17888	-0.656471	-0.574266	-1.47079	1.80392	0.114076	0.339611	-3.76303	2.30445	-0.929809	1.8173	-1.24197	0.34344	-1.23475	2.08324
+	11.7508	1.99401	Q13449	Q13449	Limbic system-associated membrane protein	LSAMP	GO:0007155;GO:0007399;GO:0007610;GO:0007626;GO:0009987;GO:0016337;GO:0022610;GO:0032502;GO:0035640;GO:0035641;GO:0045595;GO:0048731;GO:0048856;GO:0050767;GO:0050789;GO:0050793;GO:0050794;GO:0050896;GO:0051239;GO:0051960;GO:0060284;GO:0065007;GO:2000026		GO:0005886;GO:0005911;GO:0009986;GO:0016020;GO:0030054;GO:0031224;GO:0031225;GO:0042995;GO:0043005;GO:0043025;GO:0044297;GO:0044425;GO:0044464		4	4	4	11.8	11.8	11.8	37.393	47.527	42331000	131	0.424111	-2.01384	-0.62677	-1.39456	-0.448776	-2.56724	0.293575	-1.97626	-1.12098	-3.77369	-0.366177	-1.03392	-3.79545	-2.85716	-0.508419	-1.59898	-0.934839	-2.35709	0.113701	-4.21835	-1.61502	-2.90092	0.174051	-0.844308	-0.370748	-4.99954	-1.63465	-2.12858	0.59547
+	6.53303	1.98507	P55083	P55083	Microfibril-associated glycoprotein 4	MFAP4	GO:0007155;GO:0009314;GO:0009411;GO:0009416;GO:0009628;GO:0009650;GO:0009987;GO:0010224;GO:0010712;GO:0016043;GO:0019222;GO:0022607;GO:0022610;GO:0030198;GO:0034644;GO:0043062;GO:0043206;GO:0044246;GO:0048251;GO:0050789;GO:0050896;GO:0051239;GO:0051716;GO:0060255;GO:0065007;GO:0071214;GO:0071478;GO:0071482;GO:0071493;GO:0071840;GO:0071841;GO:0071842;GO:0071844;GO:0085029		GO:0001527;GO:0005576;GO:0031982;GO:0031988;GO:0043205;GO:0043226;GO:0043227;GO:0043230;GO:0044420;GO:0044421;GO:0065010;GO:0070062;GO:0071953	REACT_150331	7	7	7	52.2	52.2	52.2	28.648	307.29	514760000	417	3.28739	2.04708	1.51453	-1.59956	3.14336	2.87455	5.1566	-1.10928	3.26529	0.44317	2.10538	1.92965	0.780973	-1.58599	4.02831	-0.161913	4.00584	-3.60592	4.73064	2.16689	1.46026	-0.819569	4.57423	3.36858	4.26526	-4.51003	0.920377	-1.92562	4.1562
+	13.9835	1.97693	P00918	P00918	Carbonic anhydrase 2	CA2	GO:0001822;GO:0002009;GO:0002682;GO:0002761;GO:0002763;GO:0006730;GO:0006810;GO:0006811;GO:0006820;GO:0006873;GO:0006885;GO:0006950;GO:0008152;GO:0009268;GO:0009628;GO:0009653;GO:0009719;GO:0009725;GO:0009887;GO:0009987;GO:0010033;GO:0010035;GO:0010038;GO:0010043;GO:0010646;GO:0010647;GO:0015698;GO:0015701;GO:0015711;GO:0019725;GO:0023051;GO:0023056;GO:0030003;GO:0030004;GO:0030641;GO:0031644;GO:…	GO:0003824;GO:0004064;GO:0004089;GO:0005488;GO:0008270;GO:0016787;GO:0016788;GO:0016829;GO:0016835;GO:0016836;GO:0043167;GO:0043169;GO:0046872;GO:0046914;GO:0052689	GO:0005615;GO:0005737;GO:0005829;GO:0005886;GO:0005902;GO:0016020;GO:0016323;GO:0030424;GO:0031982;GO:0031988;GO:0042995;GO:0043005;GO:0043209;GO:0043226;GO:0043227;GO:0043230;GO:0044421;GO:0044424;GO:0044425;GO:0044444;GO:0044459;GO:0044464;GO:0045177;GO:0065010;GO:0070062	REACT_121123;REACT_121329;REACT_121380	26	26	26	90.4	90.4	90.4	29.246	323.31	3173200000	2200	4.67377	4.85532	4.1815	3.55253	5.81156	3.8303	5.88207	3.72534	6.34889	3.28931	4.93785	3.56855	2.14593	2.05558	5.21619	2.03238	3.59962	1.50517	5.58551	6.97108	5.47236	2.94756	4.32201	3.96486	4.5837	0.350687	5.45246	2.95371	4.92766
+	33.3568	1.97602	O00159	O00159	Unconventional myosin-Ic	MYO1C	GO:0002376;GO:0006605;GO:0006612;GO:0006810;GO:0006886;GO:0006950;GO:0006952;GO:0006955;GO:0015031;GO:0015931;GO:0016043;GO:0030334;GO:0030335;GO:0032386;GO:0032388;GO:0032879;GO:0032880;GO:0033157;GO:0040012;GO:0040017;GO:0044087;GO:0045087;GO:0045184;GO:0046907;GO:0048518;GO:0048522;GO:0050657;GO:0050658;GO:0050789;GO:0050794;GO:0050896;GO:0051028;GO:0051049;GO:0051050;GO:0051128;GO:0051222;GO:…	GO:0000166;GO:0003774;GO:0003824;GO:0005102;GO:0005488;GO:0005515;GO:0005524;GO:0016462;GO:0016787;GO:0016817;GO:0016818;GO:0016887;GO:0017016;GO:0017076;GO:0017111;GO:0017160;GO:0019899;GO:0030554;GO:0030898;GO:0031267;GO:0032553;GO:0032555;GO:0032559;GO:0035639;GO:0042623;GO:0051020	GO:0001726;GO:0005643;GO:0005654;GO:0005730;GO:0005737;GO:0005739;GO:0005829;GO:0005886;GO:0005902;GO:0005903;GO:0009925;GO:0016020;GO:0016023;GO:0016328;GO:0016459;GO:0016461;GO:0031253;GO:0031410;GO:0031528;GO:0031941;GO:0031982;GO:0031988;GO:0032991;GO:0042995;GO:0043226;GO:0043227;GO:0043228;GO:0043229;GO:0043230;GO:0043231;GO:0043232;GO:0043234;GO:0044421;GO:0044422;GO:0044424;GO:0044425;GO:…	REACT_147867;REACT_160086	62	62	60	60.2	60.2	58.4	121.68	323.31	1503200000	2728	3.98464	1.86874	3.33718	0.315987	2.84394	1.45953	3.06095	0.774423	3.26209	0.161986	3.67561	1.49695	1.23866	1.07629	4.23095	1.85842	3.53609	0.926756	3.86509	1.16772	3.64146	0.766766	3.03033	2.05085	3.64448	-0.288969	3.24572	0.0961456	3.62003
+	9.86457	1.96979	Q86T13	Q86T13	C-type lectin domain family 14 member A	CLEC14A		GO:0005488;GO:0030246	GO:0016021;GO:0031224;GO:0031982;GO:0031988;GO:0043226;GO:0043227;GO:0043230;GO:0044421;GO:0044425;GO:0044464;GO:0065010;GO:0070062		8	8	8	23.5	23.5	23.5	51.635	57.174	76432000	109	3.01065	-1.58773	2.60319	1.478	1.43883	-0.743752	0.349081	-2.05867	0.932848	-1.44844	0.905058	-0.0739059	-2.51115	-2.04985	1.05148	-0.543972	-0.209959	-1.69382	0.685844	-0.0490961	-3.38735	-0.897078	-0.74132	-4.94334	2.77084	-1.54113	0.364255	-2.72745	0.143038
+	19.1861	1.95982	Q02952	Q02952	A-kinase anchor protein 12	AKAP12	GO:0006140;GO:0006605;GO:0006810;GO:0006886;GO:0007165;GO:0007166;GO:0007186;GO:0009889;GO:0009891;GO:0009893;GO:0009966;GO:0009967;GO:0009987;GO:0010627;GO:0010646;GO:0010647;GO:0010738;GO:0010739;GO:0010740;GO:0015031;GO:0019219;GO:0019222;GO:0023051;GO:0023056;GO:0030799;GO:0030801;GO:0030802;GO:0030804;GO:0030808;GO:0030810;GO:0030814;GO:0030816;GO:0030817;GO:0030819;GO:0031323;GO:0031325;GO:…	GO:0005488;GO:0005515;GO:0008179;GO:0019899;GO:0051018	GO:0005737;GO:0005856;GO:0005886;GO:0005912;GO:0005924;GO:0005925;GO:0005938;GO:0016020;GO:0030054;GO:0030055;GO:0043226;GO:0043228;GO:0043229;GO:0043232;GO:0044424;GO:0044444;GO:0044464;GO:0070161		66	66	65	54.5	54.5	53.3	191.48	323.31	662100000	2489	1.76776	-2.44024	1.77659	0.44079	2.38515	0.277287	1.91022	-1.04263	2.01621	-0.0279226	2.81445	1.47431	-0.938257	-0.956814	1.75051	-0.597702	1.33036	-2.13193	1.12844	-3.71538	3.16644	0.536533	2.23888	1.36586	1.28072	-3.1177	1.22535	-0.0433426	2.24192
+	14.2304	1.95765	P46439	P46439	Glutathione S-transferase Mu 5	GSTM5	GO:0006082;GO:0006518;GO:0006520;GO:0006575;GO:0006749;GO:0006790;GO:0006805;GO:0006807;GO:0008152;GO:0009308;GO:0009987;GO:0019752;GO:0034641;GO:0042180;GO:0043436;GO:0044106;GO:0044237;GO:0044238;GO:0044281	GO:0003824;GO:0004364;GO:0016740;GO:0016765	GO:0005829;GO:0044424;GO:0044444;GO:0044464	REACT_6926	20	8	8	64.7	33	33	25.674	23.809	32391000	68	1.1513	0.191498	-1.14362	-1.73595	1.55016	-3.76987	-0.827646	-1.51856	-0.669592	-3.7573	1.58622	-1.30324	-3.0283	-3.34501	-1.40593	-3.25353	-1.85378	-3.24801	-1.1599	-4.56025	0.0483398	-2.80074	-0.1406	-3.69003	-1.44389	-3.54881	-2.501	-2.05138	-0.879827
+	16.338	1.95099	P56199	P56199	Integrin alpha-1	ITGA1	GO:0000187;GO:0001932;GO:0002376;GO:0003008;GO:0003012;GO:0003013;GO:0003018;GO:0006464;GO:0006468;GO:0006793;GO:0006796;GO:0006928;GO:0006935;GO:0006936;GO:0007155;GO:0007160;GO:0007165;GO:0007166;GO:0007229;GO:0007411;GO:0007596;GO:0007599;GO:0008152;GO:0008285;GO:0009605;GO:0009966;GO:0009968;GO:0009987;GO:0010646;GO:0010648;GO:0010921;GO:0010922;GO:0010941;GO:0010942;GO:0016043;GO:0016310;GO:…	GO:0005488;GO:0005515;GO:0005518;GO:0019899;GO:0019902;GO:0019903;GO:0043167;GO:0043169;GO:0046872	GO:0001669;GO:0005886;GO:0005912;GO:0005924;GO:0005925;GO:0008305;GO:0009897;GO:0009986;GO:0016020;GO:0016023;GO:0030054;GO:0030055;GO:0030141;GO:0031410;GO:0031982;GO:0031988;GO:0032991;GO:0034665;GO:0042995;GO:0043005;GO:0043204;GO:0043226;GO:0043227;GO:0043229;GO:0043230;GO:0043231;GO:0043234;GO:0043235;GO:0044421;GO:0044424;GO:0044425;GO:0044444;GO:0044459;GO:0044464;GO:0045121;GO:0045178;GO:…	REACT_1230;REACT_13552;REACT_169262;REACT_19200;REACT_20558;REACT_22292	23	23	20	24.2	24.2	21.6	130.85	190.85	184500000	518	1.95118	-1.32862	1.53107	-1.05938	0.346449	-0.80352	1.52545	-1.78349	1.89042	-1.75153	1.9472	-0.670233	-0.890484	-0.979485	2.63755	1.0425	2.14069	-2.55889	2.28854	2.42701	1.97593	-0.260202	1.17144	-0.584399	1.73015	-3.10584	0.22865	-2.58909	1.79109
+	17.0029	1.94813	Q13228	Q13228	Selenium-binding protein 1	SELENBP1	GO:0006810;GO:0015031;GO:0045184;GO:0051234	GO:0005488;GO:0008430	GO:0005615;GO:0005730;GO:0005829;GO:0016020;GO:0031982;GO:0031988;GO:0043226;GO:0043227;GO:0043228;GO:0043229;GO:0043230;GO:0043232;GO:0044421;GO:0044422;GO:0044424;GO:0044428;GO:0044444;GO:0044446;GO:0044464;GO:0065010;GO:0070062		43	43	41	92.2	92.2	89.6	52.39	323.31	3174100000	2690	5.3064	2.68531	5.0922	6.0721	5.06309	4.36167	5.61857	1.27775	5.24301	2.14877	5.20722	2.29818	4.10849	-0.114288	5.31269	3.68389	4.33991	1.53978	5.32291	5.14659	4.49216	3.82678	3.83912	5.42091	5.05881	-1.16253	5.34971	0.609467	5.65238
+	13.0983	1.94418	P49407	P49407	Beta-arrestin-1	ARRB1	GO:0001775;GO:0001817;GO:0001818;GO:0001932;GO:0001934;GO:0002031;GO:0002090;GO:0002092;GO:0002791;GO:0002793;GO:0006139;GO:0006140;GO:0006351;GO:0006355;GO:0006357;GO:0006366;GO:0006464;GO:0006508;GO:0006511;GO:0006807;GO:0006810;GO:0006892;GO:0006897;GO:0006898;GO:0006996;GO:0007010;GO:0007015;GO:0007165;GO:0007166;GO:0007219;GO:0007596;GO:0007599;GO:0007602;GO:0008152;GO:0009056;GO:0009057;GO:…	GO:0000975;GO:0001067;GO:0001664;GO:0003676;GO:0003677;GO:0004857;GO:0004866;GO:0004869;GO:0005096;GO:0005102;GO:0005159;GO:0005488;GO:0005515;GO:0008047;GO:0008134;GO:0019899;GO:0030234;GO:0030414;GO:0030695;GO:0031625;GO:0031701;GO:0043027;GO:0043028;GO:0044212;GO:0060589;GO:0061134;GO:0061135	GO:0000139;GO:0000785;GO:0005634;GO:0005654;GO:0005737;GO:0005765;GO:0005774;GO:0005829;GO:0005886;GO:0005905;GO:0012506;GO:0016020;GO:0030659;GO:0031090;GO:0031143;GO:0031410;GO:0031982;GO:0042995;GO:0043226;GO:0043227;GO:0043229;GO:0043231;GO:0044422;GO:0044424;GO:0044425;GO:0044427;GO:0044428;GO:0044431;GO:0044433;GO:0044437;GO:0044444;GO:0044446;GO:0044464	REACT_118614;REACT_19287;REACT_19400;REACT_21384;REACT_267753	15	15	15	52.9	52.9	52.9	47.065	211.7	144000000	391	1.40081	-0.488955	0.929369	-0.30966	0.315577	-0.0271549	0.512623	-1.8668	-0.983738	-3.8468	1.08037	-4.53454	-0.337992	-2.98493	1.87123	0.357309	1.24426	-1.31643	1.54626	-0.738915	-1.28975	-0.337934	-0.535933	0.700416	1.61715	-3.22231	0.507743	-1.27698	1.41967
+	9.10794	1.932	Q01484	Q01484	Ankyrin-2	ANK2	GO:0002027;GO:0003008;GO:0003012;GO:0003279;GO:0003283;GO:0006605;GO:0006810;GO:0006811;GO:0006812;GO:0006816;GO:0006873;GO:0006874;GO:0006875;GO:0006886;GO:0006935;GO:0006936;GO:0006937;GO:0006941;GO:0006942;GO:0007009;GO:0007043;GO:0007165;GO:0007411;GO:0008016;GO:0008104;GO:0009605;GO:0009893;GO:0009987;GO:0010033;GO:0010468;GO:0010522;GO:0010604;GO:0010608;GO:0010628;GO:0010880;GO:0010881;GO:…	GO:0005198;GO:0005200;GO:0005488;GO:0005515;GO:0008092;GO:0015459;GO:0016247;GO:0019899;GO:0019900;GO:0019901;GO:0030507;GO:0030674;GO:0044325;GO:0051117;GO:0060090	GO:0005622;GO:0005829;GO:0005856;GO:0005886;GO:0005887;GO:0005911;GO:0014704;GO:0016020;GO:0016021;GO:0016323;GO:0016324;GO:0030018;GO:0030054;GO:0030315;GO:0031224;GO:0031226;GO:0031430;GO:0031672;GO:0042383;GO:0042995;GO:0043005;GO:0043034;GO:0043226;GO:0043228;GO:0043229;GO:0043232;GO:0044291;GO:0044422;GO:0044424;GO:0044425;GO:0044444;GO:0044449;GO:0044456;GO:0044459;GO:0044464;GO:0045121;GO:…	REACT_22266	26	17	17	8.8	6.8	6.8	433.71	66.857	91164000	87	0.900802	-0.645889	2.79393	-2.7832	3.48292	-0.188967	0.909933	-1.34149	1.91854	-0.652354	0.946918	-0.949924	-0.520275	-2.20758	-0.271694	-0.712801	1.20257	-3.29357	0.065712	-3.4363	0.00270081	-2.04659	-0.929697	-0.31968	-0.108258	-4.60939	-0.311168	-4.22522	2.22542
+	13.4794	1.92869	O76024	O76024	Wolframin	WFS1	GO:0001822;GO:0003008;GO:0003014;GO:0003091;GO:0006355;GO:0006457;GO:0006508;GO:0006511;GO:0006810;GO:0006873;GO:0006874;GO:0006875;GO:0006886;GO:0006950;GO:0006983;GO:0006984;GO:0006986;GO:0007165;GO:0007600;GO:0007601;GO:0007605;GO:0007610;GO:0007635;GO:0008152;GO:0009056;GO:0009057;GO:0009607;GO:0009889;GO:0009893;GO:0009987;GO:0010033;GO:0010468;GO:0010498;GO:0010556;GO:0010604;GO:0010608;GO:…	GO:0005215;GO:0005488;GO:0005515;GO:0008134;GO:0019899;GO:0031625;GO:0033613;GO:0051117	GO:0005783;GO:0005789;GO:0016020;GO:0016021;GO:0030176;GO:0030425;GO:0031090;GO:0031224;GO:0031227;GO:0031300;GO:0031301;GO:0042995;GO:0043005;GO:0043226;GO:0043227;GO:0043229;GO:0043231;GO:0044422;GO:0044424;GO:0044425;GO:0044432;GO:0044444;GO:0044446;GO:0044464	REACT_18273	14	14	14	26	26	26	100.29	75.62	284350000	373	3.13418	1.80652	2.7014	-0.0464745	0.416885	1.60959	1.43929	-0.55337	2.91233	-1.54445	3.42613	0.938124	2.15835	0.144972	3.46899	1.66713	3.24117	1.3242	2.80747	2.03063	3.3665	-4.73681	3.77106	2.21187	3.08882	-1.27652	2.96163	-0.0881557	2.88293
+	6.93624	1.92778	P69891	P69891	Hemoglobin subunit gamma-1	HBG1	GO:0007596;GO:0007599;GO:0032501;GO:0050817;GO:0050878;GO:0065007;GO:0065008	GO:0005215;GO:0005344;GO:0005488;GO:0005506;GO:0019825;GO:0020037;GO:0022892;GO:0043167;GO:0043169;GO:0046872;GO:0046906;GO:0046914	GO:0005829;GO:0005833;GO:0032991;GO:0043234;GO:0044424;GO:0044444;GO:0044445;GO:0044464	REACT_24970	20	19	2	95.2	88.4	9.5	16.14	323.31	1837100000	1245	6.0159	6.92817	2.64386	3.71847	2.90594	2.33564	3.86882	2.21866	5.9316	3.2622	3.16239	1.07524	-0.0379124	-0.936186	3.38588	0.219168	1.7716	0.658854	4.60972	6.39012	3.48123	3.9581	3.23251	3.91639	3.86763	-0.31583	4.78045	1.98308	4.05335
+	8.97972	1.92605	P35612	P35612	Beta-adducin	ADD2	GO:0006461;GO:0006810;GO:0006996;GO:0007010;GO:0007015;GO:0008064;GO:0009987;GO:0010639;GO:0016043;GO:0022607;GO:0030029;GO:0030036;GO:0030097;GO:0030832;GO:0030833;GO:0030834;GO:0030835;GO:0030837;GO:0031333;GO:0032092;GO:0032271;GO:0032272;GO:0032502;GO:0032535;GO:0032956;GO:0032970;GO:0033043;GO:0043242;GO:0043244;GO:0043254;GO:0043393;GO:0043933;GO:0044087;GO:0044093;GO:0048513;GO:0048519;GO:…	GO:0003779;GO:0005198;GO:0005488;GO:0005515;GO:0008092;GO:0030507;GO:0042802;GO:0042803;GO:0046982;GO:0046983;GO:0051015	GO:0005829;GO:0005886;GO:0008290;GO:0016020;GO:0016023;GO:0031410;GO:0031982;GO:0031988;GO:0032991;GO:0043226;GO:0043227;GO:0043229;GO:0043231;GO:0043234;GO:0044422;GO:0044424;GO:0044430;GO:0044444;GO:0044446;GO:0044464	REACT_268444	13	13	13	30.2	30.2	30.2	80.853	95.187	44740000	93	-1.87372	-0.128309	-2.51332	-2.1986	-0.257404	-1.76246	0.299856	0.0886679	2.07253	-2.3668	-0.683371	-1.4392	-4.06421	-3.94127	-0.806244	-3.73757	-3.66839	-4.64602	1.22927	2.57736	-1.064	-3.52614	-2.66451	-0.587613	0.476239	-3.58116	0.12658	-4.76607	-1.46733
+	6.42032	1.91765	P43005	P43005	Excitatory amino acid transporter 3	SLC1A1	GO:0000101;GO:0001505;GO:0006461;GO:0006810;GO:0006811;GO:0006820;GO:0006836;GO:0006865;GO:0007154;GO:0007267;GO:0007268;GO:0007269;GO:0009987;GO:0014047;GO:0015711;GO:0015800;GO:0015804;GO:0015807;GO:0015810;GO:0015813;GO:0015837;GO:0015849;GO:0016043;GO:0022607;GO:0023052;GO:0023061;GO:0032940;GO:0042883;GO:0042940;GO:0043090;GO:0043092;GO:0043933;GO:0046903;GO:0046942;GO:0051234;GO:0051259;GO:…	GO:0000099;GO:0005215;GO:0005275;GO:0005283;GO:0005310;GO:0005313;GO:0005342;GO:0005343;GO:0005416;GO:0005488;GO:0008324;GO:0008509;GO:0015075;GO:0015077;GO:0015081;GO:0015171;GO:0015172;GO:0015175;GO:0015179;GO:0015291;GO:0015293;GO:0015294;GO:0015296;GO:0015370;GO:0015501;GO:0016595;GO:0016597;GO:0017153;GO:0022804;GO:0022857;GO:0022890;GO:0022891;GO:0022892;GO:0031406;GO:0033229;GO:0043176;GO:…	GO:0005886;GO:0005887;GO:0016020;GO:0016021;GO:0016324;GO:0031224;GO:0031226;GO:0031982;GO:0031988;GO:0043226;GO:0043227;GO:0043230;GO:0044421;GO:0044425;GO:0044459;GO:0044464;GO:0065010;GO:0070062	REACT_12591;REACT_19397	4	4	4	12.6	12.6	12.6	57.1	12.819	77498000	94	1.64998	2.36233	-0.0747089	-4.56295	-0.909332	1.58518	1.3004	0.966382	-1.87464	-1.33005	-0.550217	-3.88517	-3.74324	-0.23031	-0.192423	-0.934065	2.89621	-3.41637	0.975758	1.27333	3.11405	0.612207	2.28638	-0.172133	1.00747	-4.09362	0.316016	-2.86676	1.30022
+	16.583	1.91055	O15247	O15247	Chloride intracellular channel protein 2	CLIC2	GO:0006810;GO:0006937;GO:0006942;GO:0007165;GO:0008016;GO:0008152;GO:0009987;GO:0010522;GO:0010880;GO:0010881;GO:0010882;GO:0010959;GO:0019722;GO:0019932;GO:0022898;GO:0032386;GO:0032409;GO:0032410;GO:0032412;GO:0032413;GO:0032844;GO:0032879;GO:0034762;GO:0034765;GO:0035556;GO:0043269;GO:0044057;GO:0044092;GO:0044093;GO:0048519;GO:0050789;GO:0050794;GO:0050896;GO:0051049;GO:0051051;GO:0051098;GO:…	GO:0003824;GO:0004601;GO:0004602;GO:0005215;GO:0005216;GO:0005244;GO:0005253;GO:0005254;GO:0008509;GO:0015075;GO:0015267;GO:0016209;GO:0016491;GO:0016684;GO:0022803;GO:0022832;GO:0022836;GO:0022838;GO:0022857;GO:0022891;GO:0022892	GO:0005622;GO:0005634;GO:0005737;GO:0032991;GO:0034702;GO:0034707;GO:0043226;GO:0043227;GO:0043229;GO:0043231;GO:0043234;GO:0044424;GO:0044425;GO:0044464	REACT_160189	17	16	16	72.9	69.6	69.6	28.356	306.15	262060000	496	2.81275	-0.0911522	1.92849	2.61627	1.59534	1.20217	1.79379	-2.13419	2.08853	0.381806	2.12224	0.0684719	0.637167	-2.82083	1.17772	0.0775127	1.54552	-1.50969	2.0524	1.66791	2.74966	1.18024	1.52164	-2.03686	1.65782	-3.11705	1.68172	-3.39021	1.36203
+	9.11436	1.89751	Q14515	Q14515	SPARC-like protein 1	SPARCL1	GO:0007165;GO:0009987;GO:0050789;GO:0050794;GO:0050896;GO:0051716;GO:0065007	GO:0005488;GO:0005509;GO:0043167;GO:0043169;GO:0046872	GO:0005578;GO:0005615;GO:0031012;GO:0031982;GO:0031988;GO:0043226;GO:0043227;GO:0043230;GO:0044421;GO:0065010;GO:0070062		26	26	23	58	58	54.1	75.207	323.31	215340000	351	4.3109	0.850712	2.24441	3.18972	2.45185	0.411634	2.82008	-0.489043	2.18175	-0.39561	3.46393	0.0354328	0.652571	-3.42233	0.614517	0.872854	-0.582224	-2.11922	0.112005	-0.342496	5.69563	2.60333	2.21806	0.318908	2.13158	-1.88982	0.156974	-1.27223	2.27249
+	8.78615	1.89082	Q01469;A8MUU1	Q01469	Fatty acid-binding protein, epidermal	FABP5	GO:0005975;GO:0005996;GO:0006006;GO:0006066;GO:0006576;GO:0006629;GO:0006638;GO:0006639;GO:0006641;GO:0006644;GO:0006650;GO:0006656;GO:0006662;GO:0006807;GO:0006810;GO:0006950;GO:0008152;GO:0008544;GO:0008610;GO:0008643;GO:0008645;GO:0008654;GO:0009056;GO:0009058;GO:0009308;GO:0009611;GO:0009888;GO:0009987;GO:0015749;GO:0015758;GO:0016042;GO:0018904;GO:0019318;GO:0019433;GO:0019637;GO:0032502;GO:…	GO:0005215;GO:0005488;GO:0005504;GO:0008289;GO:0031406;GO:0033293	GO:0005654;GO:0005737;GO:0005829;GO:0031982;GO:0031988;GO:0043226;GO:0043227;GO:0043230;GO:0044421;GO:0044422;GO:0044424;GO:0044428;GO:0044444;GO:0044446;GO:0044464;GO:0065010;GO:0070062	REACT_267785;REACT_494	18	18	16	82.2	82.2	78.5	15.164	323.31	374710000	577	0.38828	-1.44887	0.904573	-2.478	-0.419643	-1.41682	1.34144	0.565806	0.6443	-1.72378	1.03161	2.14127	1.63124	3.97109	1.80491	0.526085	1.57268	-2.92152	2.34109	-1.1738	2.58327	-1.27107	1.00931	0.296292	1.89751	0.212084	0.860429	1.71639	2.2626
+	14.7967	1.88619	P51636	P51636	Caveolin-2	CAV2	GO:0001765;GO:0001936;GO:0001937;GO:0001938;GO:0006140;GO:0006461;GO:0006810;GO:0006897;GO:0006898;GO:0006906;GO:0006944;GO:0006996;GO:0007005;GO:0007029;GO:0007088;GO:0007165;GO:0007166;GO:0007167;GO:0007169;GO:0007346;GO:0008277;GO:0008284;GO:0008285;GO:0008286;GO:0009719;GO:0009725;GO:0009894;GO:0009966;GO:0009967;GO:0009968;GO:0009987;GO:0010033;GO:0010324;GO:0010564;GO:0010627;GO:0010646;GO:…	GO:0001664;GO:0005102;GO:0005488;GO:0005515;GO:0031748;GO:0042802;GO:0042803;GO:0046983;GO:0050780	GO:0000139;GO:0002080;GO:0005622;GO:0005634;GO:0005794;GO:0005886;GO:0005887;GO:0005901;GO:0012506;GO:0016020;GO:0016021;GO:0016023;GO:0019897;GO:0019898;GO:0030133;GO:0030659;GO:0030667;GO:0031090;GO:0031224;GO:0031226;GO:0031234;GO:0031410;GO:0031982;GO:0031988;GO:0032991;GO:0043226;GO:0043227;GO:0043229;GO:0043231;GO:0043234;GO:0044422;GO:0044424;GO:0044425;GO:0044431;GO:0044433;GO:0044444;GO:…		7	7	6	63.6	63.6	54.9	18.291	22.58	23368000	46	0.640101	-4.20086	-1.37589	-2.65071	-1.92952	-3.75597	-3.45423	-4.2623	-1.89861	-3.64428	-3.88499	-3.84909	-4.79237	-3.90881	-2.92472	-3.90901	-3.87645	-3.31273	-3.26109	-4.0061	3.29109	-4.40871	-3.36736	-4.25065	-2.81236	-3.82939	-2.88994	-3.69373	-3.25906
+	13.1784	1.88188	P07738	P07738	Bisphosphoglycerate mutase	BPGM	GO:0005975;GO:0005996;GO:0006006;GO:0006007;GO:0006066;GO:0006091;GO:0006096;GO:0007585;GO:0008152;GO:0009056;GO:0009987;GO:0016052;GO:0019318;GO:0019320;GO:0032501;GO:0032502;GO:0044237;GO:0044238;GO:0044262;GO:0044275;GO:0044281;GO:0044282;GO:0046164;GO:0046365;GO:0048468;GO:0048821;GO:0048856;GO:0048869	GO:0003824;GO:0004082;GO:0004083;GO:0004619;GO:0016787;GO:0016788;GO:0016791;GO:0016853;GO:0016866;GO:0016868;GO:0034416;GO:0042578	GO:0031982;GO:0031988;GO:0043226;GO:0043227;GO:0043230;GO:0044421;GO:0065010;GO:0070062		16	16	16	79.9	79.9	79.9	30.005	180.31	532590000	1069	1.26832	2.68999	1.52038	-0.433002	3.32149	1.36541	3.07112	1.28195	3.6116	0.65759	2.11091	0.458525	-0.389832	-0.458757	2.68987	-0.479668	0.622953	-0.795071	3.03901	4.34852	3.57616	0.0811672	1.56645	1.44825	1.59261	-1.25104	2.72108	1.41083	2.27316
+	16.8183	1.87732	P12429	P12429	Annexin A3	ANXA3	GO:0001775;GO:0002252;GO:0002263;GO:0002274;GO:0002275;GO:0002283;GO:0002366;GO:0002376;GO:0006355;GO:0006810;GO:0006887;GO:0006897;GO:0006909;GO:0006950;GO:0006952;GO:0009607;GO:0009617;GO:0009889;GO:0009987;GO:0010324;GO:0010468;GO:0010556;GO:0010594;GO:0010595;GO:0016043;GO:0016044;GO:0016192;GO:0019219;GO:0019222;GO:0022603;GO:0030334;GO:0030335;GO:0031323;GO:0031326;GO:0032879;GO:0032940;GO:…	GO:0004857;GO:0004859;GO:0005488;GO:0005509;GO:0005515;GO:0005543;GO:0005544;GO:0008289;GO:0019834;GO:0030234;GO:0043167;GO:0043169;GO:0046872;GO:0048306;GO:0055102	GO:0005737;GO:0005886;GO:0012506;GO:0016020;GO:0016023;GO:0030141;GO:0030659;GO:0030666;GO:0030670;GO:0031090;GO:0031410;GO:0031982;GO:0031988;GO:0042581;GO:0043226;GO:0043227;GO:0043229;GO:0043230;GO:0043231;GO:0044421;GO:0044422;GO:0044424;GO:0044433;GO:0044444;GO:0044446;GO:0044464;GO:0065010;GO:0070062		34	34	33	74.6	74.6	73.1	36.375	323.31	1597700000	1903	4.69265	2.97347	3.8235	2.96469	3.45469	2.49542	4.01595	1.89243	3.73228	2.41768	4.55278	2.99722	2.15599	-0.441843	4.22629	1.81301	2.78158	1.25744	3.32911	2.86631	4.22508	2.80544	3.08729	2.21314	3.93576	-1.99691	4.19078	2.71862	3.99771
+	16.4575	1.87674	P10301	P10301	Ras-related protein R-Ras	RRAS	GO:0002521;GO:0006935;GO:0007154;GO:0007165;GO:0007264;GO:0007265;GO:0007267;GO:0007268;GO:0007411;GO:0008152;GO:0009605;GO:0009653;GO:0009966;GO:0009987;GO:0010627;GO:0022603;GO:0023051;GO:0023052;GO:0030154;GO:0030334;GO:0030336;GO:0032502;GO:0032879;GO:0035556;GO:0040011;GO:0040012;GO:0040013;GO:0042221;GO:0042330;GO:0043408;GO:0045765;GO:0045766;GO:0048518;GO:0048519;GO:0048523;GO:0048583;GO:…	GO:0000166;GO:0003824;GO:0003924;GO:0005488;GO:0005515;GO:0005525;GO:0016462;GO:0016787;GO:0016817;GO:0016818;GO:0017076;GO:0017111;GO:0019001;GO:0019003;GO:0032403;GO:0032553;GO:0032555;GO:0032561;GO:0035639	GO:0005886;GO:0005912;GO:0005924;GO:0005925;GO:0016020;GO:0030054;GO:0030055;GO:0031982;GO:0031988;GO:0043226;GO:0043227;GO:0043230;GO:0044421;GO:0044464;GO:0065010;GO:0070062;GO:0070161	REACT_19266;REACT_19279;REACT_20568	9	9	7	45.9	45.9	36.2	23.48	193.39	148480000	411	2.79854	0.565794	2.11104	1.07196	1.92178	0.939106	2.13148	-0.40121	2.23428	0.361424	2.14637	-0.0158901	0.186121	-1.07469	2.61551	0.656424	1.39019	-0.902407	1.74687	0.941056	0.729633	0.812998	1.69338	-4.84888	2.3657	-2.03278	2.00265	-3.82973	2.0082
+	13.3856	1.87578	Q9NZU5	Q9NZU5	LIM and cysteine-rich domains protein 1	LMCD1	GO:0000122;GO:0002230;GO:0002682;GO:0002697;GO:0002831;GO:0006139;GO:0006351;GO:0006355;GO:0006357;GO:0006807;GO:0008152;GO:0009058;GO:0009059;GO:0009889;GO:0009890;GO:0009892;GO:0009966;GO:0009967;GO:0009987;GO:0010468;GO:0010556;GO:0010558;GO:0010605;GO:0010611;GO:0010629;GO:0010646;GO:0010647;GO:0014743;GO:0016070;GO:0019219;GO:0019222;GO:0023051;GO:0023056;GO:0031323;GO:0031324;GO:0031326;GO:…	GO:0000988;GO:0000989;GO:0003712;GO:0003714;GO:0005488;GO:0008270;GO:0043167;GO:0043169;GO:0046872;GO:0046914	GO:0005615;GO:0005634;GO:0005737;GO:0043226;GO:0043227;GO:0043229;GO:0043231;GO:0044421;GO:0044424;GO:0044464		18	18	18	54.2	54.2	54.2	40.832	286.65	312540000	583	1.39022	-1.07892	2.30294	-0.347891	1.31195	-1.38654	2.20288	-2.54819	3.05808	-1.97303	1.8895	-0.943209	-2.7933	-1.44843	2.75107	1.22195	2.38815	-1.44931	2.57447	-1.1294	-0.739428	-0.679163	2.3619	0.794253	2.706	-1.25757	1.52931	0.529222	2.30295
+	14.3623	1.87478	O14639	O14639	Actin-binding LIM protein 1	ABLIM1	GO:0003008;GO:0006355;GO:0006357;GO:0006935;GO:0006996;GO:0007010;GO:0007411;GO:0007600;GO:0007601;GO:0009605;GO:0009653;GO:0009887;GO:0009889;GO:0009891;GO:0009893;GO:0009987;GO:0010468;GO:0010556;GO:0010557;GO:0010604;GO:0010628;GO:0010927;GO:0016043;GO:0019219;GO:0019222;GO:0022607;GO:0030030;GO:0030031;GO:0030032;GO:0031323;GO:0031325;GO:0031326;GO:0031328;GO:0032501;GO:0032502;GO:0040011;GO:…	GO:0003779;GO:0005488;GO:0005515;GO:0008092;GO:0008270;GO:0043167;GO:0043169;GO:0046872;GO:0046914	GO:0001725;GO:0005737;GO:0005856;GO:0015629;GO:0030027;GO:0032432;GO:0042641;GO:0042995;GO:0043226;GO:0043228;GO:0043229;GO:0043232;GO:0044422;GO:0044424;GO:0044430;GO:0044446;GO:0044464	REACT_22351	17	17	17	30.5	30.5	30.5	87.687	137.73	128080000	455	1.12224	-3.20749	0.241381	2.06922	-0.593813	-0.284454	-1.22158	-0.807528	-0.3557	-2.7279	0.81666	-2.94967	-2.91777	-2.52804	0.278597	-1.48597	-0.616138	-3.17902	-0.688595	-3.80061	0.898989	-0.556534	0.550987	-1.59409	-0.593804	-0.936413	-0.873237	-4.15239	0.518501
+	24.6101	1.86618	P00568	P00568	Adenylate kinase isoenzyme 1	AK1	GO:0006139;GO:0006163;GO:0006164;GO:0006165;GO:0006172;GO:0006753;GO:0006793;GO:0006796;GO:0006807;GO:0007050;GO:0008152;GO:0009058;GO:0009117;GO:0009123;GO:0009126;GO:0009132;GO:0009133;GO:0009135;GO:0009136;GO:0009141;GO:0009142;GO:0009144;GO:0009150;GO:0009152;GO:0009161;GO:0009165;GO:0009167;GO:0009179;GO:0009180;GO:0009185;GO:0009188;GO:0009199;GO:0009205;GO:0009259;GO:0009260;GO:0009987;GO:…	GO:0000166;GO:0003824;GO:0004017;GO:0004550;GO:0005488;GO:0005524;GO:0016301;GO:0016740;GO:0016772;GO:0016776;GO:0017076;GO:0019201;GO:0019205;GO:0030554;GO:0032553;GO:0032555;GO:0032559;GO:0035639	GO:0001520;GO:0005737;GO:0005829;GO:0005886;GO:0016020;GO:0031982;GO:0031988;GO:0043226;GO:0043227;GO:0043230;GO:0044421;GO:0044422;GO:0044424;GO:0044444;GO:0044447;GO:0044463;GO:0044464;GO:0065010;GO:0070062	REACT_21330	20	20	19	74.7	74.7	70.1	21.635	323.31	1073400000	1217	3.99158	1.69931	3.59114	1.47876	3.98345	2.79384	4.48457	1.39413	4.1394	0.432508	3.50824	0.752148	2.29857	0.404587	3.96432	1.97868	2.96244	0.524792	3.95094	3.83048	4.0013	1.93409	3.53867	3.4675	3.50018	-0.753695	3.62228	0.936848	3.76292
+	8.78358	1.86215	Q4V9L6	Q4V9L6	Transmembrane protein 119	TMEM119	GO:0001649;GO:0009987;GO:0030154;GO:0032502;GO:0048869		GO:0005783;GO:0016021;GO:0031224;GO:0043226;GO:0043227;GO:0043229;GO:0043231;GO:0044424;GO:0044425;GO:0044444;GO:0044464		2	2	2	12.7	12.7	12.7	29.203	29.111	56605000	163	0.132138	-4.13846	-0.545544	1.32325	-0.53393	-1.52548	0.271654	-3.72541	1.51365	-2.73219	0.34273	-0.753889	-2.82667	-2.13126	-0.666691	-2.23992	-1.45458	-2.79236	1.45218	-3.31082	0.873571	-0.750546	-4.46109	-0.778295	-0.824641	-4.66127	-0.251224	-3.87109	0.939005
+	11.4575	1.86068	Q08AI8	Q08AI8	Uncharacterized protein C2orf54	C2orf54					9	9	9	26.8	26.8	26.8	49.564	20.556	52156000	110	2.05671	-0.069725	-0.528582	-2.37392	-0.576012	-1.28934	0.409157	-2.51471	0.0937672	-1.77235	1.55743	-3.58881	-1.56637	-4.1791	0.404472	-2.08171	0.0614185	-3.00541	-0.235136	-3.88584	-0.513142	-1.41253	-0.604553	-1.05687	0.104259	-3.18996	0.283959	-2.7365	0.0840092
+	2.98993	1.85447	P00326	P00326	Alcohol dehydrogenase 1C	ADH1C	GO:0006066;GO:0006067;GO:0006069;GO:0006805;GO:0008152;GO:0009987;GO:0034308;GO:0044237;GO:0044281;GO:0055114	GO:0003824;GO:0004022;GO:0005488;GO:0008270;GO:0016491;GO:0016614;GO:0016616;GO:0043167;GO:0043169;GO:0046872;GO:0046914	GO:0005829;GO:0044424;GO:0044444;GO:0044464	REACT_268561;REACT_34	21	9	7	57.6	33.6	28.5	39.867	323.31	595640000	153	2.13432	-0.131605	2.00416	1.48258	4.6182	-4.18119	-4.68372	0.330316	2.72972	-5.69816	3.50459	3.12985	1.39525	-4.11318	3.85802	-3.92429	3.4518	-4.25592	3.55276	-1.8608	-3.90991	-3.38732	3.00904	3.67735	1.88218	5.23354	2.54961	-1.07733	3.79514
+	9.74249	1.854	Q06278	Q06278	Aldehyde oxidase	AOX1	GO:0006766;GO:0006767;GO:0006950;GO:0006952;GO:0006954;GO:0008152;GO:0009611;GO:0009987;GO:0042816;GO:0044237;GO:0044281;GO:0046483;GO:0050896;GO:0072593	GO:0000166;GO:0003824;GO:0004031;GO:0004854;GO:0005488;GO:0005506;GO:0008762;GO:0009055;GO:0016491;GO:0016614;GO:0016616;GO:0016623;GO:0016725;GO:0016726;GO:0016903;GO:0043167;GO:0043169;GO:0043546;GO:0046872;GO:0046914;GO:0048037;GO:0050660;GO:0050662;GO:0051287;GO:0051536;GO:0051537;GO:0051540	GO:0005737;GO:0005829;GO:0031982;GO:0031988;GO:0043226;GO:0043227;GO:0043230;GO:0044421;GO:0044424;GO:0044444;GO:0044464;GO:0065010;GO:0070062	REACT_25012	10	10	10	10.5	10.5	10.5	147.92	60.872	26770000	94	-2.00285	-1.74763	0.600962	-2.35848	1.07317	-3.1398	-2.81912	-5.22236	-3.1199	-4.04197	1.11472	-1.38762	-1.23531	-3.50218	-0.346308	-3.16162	-3.2241	-3.4393	-1.99927	-2.60669	-4.14448	-3.90863	0.931248	-1.2365	-1.91655	-3.19191	-1.39621	-3.8705	0.947792
+	16.5449	1.84499	P43121	P43121	Cell surface glycoprotein MUC18	MCAM	GO:0001525;GO:0003008;GO:0003014;GO:0003094;GO:0007155;GO:0009653;GO:0009987;GO:0022610;GO:0030334;GO:0030335;GO:0032501;GO:0032502;GO:0032879;GO:0040012;GO:0040017;GO:0048518;GO:0048522;GO:0048646;GO:0050789;GO:0050794;GO:0051270;GO:0051272;GO:0060055;GO:0061042;GO:0065007;GO:2000145;GO:2000147		GO:0005615;GO:0005634;GO:0005886;GO:0005912;GO:0005924;GO:0005925;GO:0009897;GO:0016020;GO:0016021;GO:0030054;GO:0030055;GO:0031224;GO:0043226;GO:0043227;GO:0043229;GO:0043231;GO:0044421;GO:0044424;GO:0044425;GO:0044459;GO:0044464;GO:0070161		20	20	13	43.3	43.3	24.8	71.607	245.35	243160000	506	2.15652	-1.68892	1.96402	1.56418	1.29164	-0.378424	1.59127	-0.138471	2.6162	0.273772	1.47591	-0.0679722	-1.48907	-0.43302	1.48075	0.801788	1.39844	-0.127588	1.89692	-1.22029	1.83161	-0.0298748	2.71157	0.891908	1.84022	-2.7415	-0.28056	-1.28674	1.25928
+	12.7505	1.81822	P02675	P02675	Fibrinogen beta chain;Fibrinopeptide B;Fibrinogen beta chain	FGB	GO:0001775;GO:0002376;GO:0002576;GO:0002791;GO:0002793;GO:0006461;GO:0006810;GO:0006887;GO:0006950;GO:0006952;GO:0006955;GO:0006959;GO:0007155;GO:0007160;GO:0007165;GO:0007596;GO:0007599;GO:0009607;GO:0009617;GO:0009719;GO:0009725;GO:0009966;GO:0009967;GO:0009987;GO:0010033;GO:0010035;GO:0010038;GO:0010470;GO:0010627;GO:0010646;GO:0010647;GO:0010740;GO:0010941;GO:0016043;GO:0016192;GO:0016337;GO:…	GO:0005198;GO:0005488;GO:0005515;GO:0051087	GO:0005576;GO:0005577;GO:0005615;GO:0005886;GO:0005938;GO:0009897;GO:0009986;GO:0016020;GO:0016023;GO:0030141;GO:0031091;GO:0031093;GO:0031410;GO:0031974;GO:0031982;GO:0031983;GO:0031988;GO:0032991;GO:0034774;GO:0043226;GO:0043227;GO:0043229;GO:0043230;GO:0043231;GO:0043233;GO:0043234;GO:0044421;GO:0044422;GO:0044424;GO:0044425;GO:0044433;GO:0044444;GO:0044446;GO:0044459;GO:0044464;GO:0060205;GO:…	REACT_13552;REACT_1439;REACT_15381;REACT_15443;REACT_15523;REACT_318	50	50	39	76.4	76.4	61.1	55.928	323.31	7052300000	4663	2.61035	5.31534	3.90117	-0.383944	4.85098	2.24492	5.01291	2.60162	4.20673	2.35863	4.57348	2.54052	4.47625	2.80622	5.74398	3.83128	3.8903	2.0701	6.61754	6.52494	3.61239	-0.0890694	3.63973	3.8093	3.81627	0.115656	5.7184	2.20307	5.22701
+	8.55396	1.81655	Q9NPY3	Q9NPY3	Complement component C1q receptor	CD93	GO:0001775;GO:0002230;GO:0002274;GO:0002376;GO:0002682;GO:0002697;GO:0002831;GO:0006810;GO:0006897;GO:0006909;GO:0007155;GO:0009987;GO:0010324;GO:0016032;GO:0016043;GO:0016044;GO:0016192;GO:0016337;GO:0022610;GO:0031347;GO:0042116;GO:0043900;GO:0045321;GO:0048583;GO:0050688;GO:0050691;GO:0050789;GO:0051234;GO:0061024;GO:0065007;GO:0071840;GO:0080134	GO:0001846;GO:0001848;GO:0001849;GO:0004872;GO:0005488;GO:0005509;GO:0005515;GO:0030246;GO:0043167;GO:0043169;GO:0046872	GO:0005886;GO:0009986;GO:0016020;GO:0016021;GO:0016023;GO:0031224;GO:0031410;GO:0031982;GO:0031988;GO:0043226;GO:0043227;GO:0043229;GO:0043231;GO:0044424;GO:0044425;GO:0044444;GO:0044464		11	11	6	22.2	22.2	12.9	68.559	85.29	81853000	285	2.61778	-1.18058	1.13828	0.79785	-0.608328	-2.06164	0.852276	-2.87156	1.10269	-0.424396	0.802496	-3.27615	-3.44726	-4.79961	0.482321	-2.06726	-0.403862	-4.22625	0.75238	-2.96627	2.28617	1.42802	0.397705	-2.9258	0.753062	-3.43225	0.911933	-5.82526	-0.141134
+	12.436	1.80947	Q96F85	Q96F85	CB1 cannabinoid receptor-interacting protein 1	CNRIP1					5	5	5	42.7	42.7	42.7	18.648	61.208	56075000	158	0.362523	-4.35286	-0.253368	-1.82087	0.808685	-3.12658	0.158419	-0.32009	1.01694	-4.13512	0.448027	-1.71469	-0.333942	-1.72653	0.562595	-1.50825	0.393093	-1.5716	0.232737	-0.919742	-0.382418	-3.76918	1.02164	0.985885	-0.888478	-4.51412	0.109998	-2.75415	0.644621
+	7.29791	1.80377	P55107	P55107	Growth/differentiation factor 10	GDF10	GO:0001501;GO:0001932;GO:0001934;GO:0007165;GO:0007166;GO:0007167;GO:0007178;GO:0007179;GO:0009893;GO:0009966;GO:0009967;GO:0009987;GO:0010562;GO:0010604;GO:0010627;GO:0010646;GO:0010647;GO:0010862;GO:0010941;GO:0019220;GO:0019222;GO:0023051;GO:0023056;GO:0030154;GO:0030278;GO:0031323;GO:0031325;GO:0031399;GO:0031401;GO:0032268;GO:0032270;GO:0032502;GO:0040007;GO:0042325;GO:0042327;GO:0042981;GO:…	GO:0005102;GO:0005125;GO:0005126;GO:0005160;GO:0005488;GO:0005515;GO:0008083	GO:0005615;GO:0044421		4	4	4	12.8	12.8	12.8	53.121	13.189	86753000	50	-1.22323	0.204618	-1.3554	-4.52243	-2.97419	1.35638	0.584852	-4.49391	2.2655	-3.90078	0.381512	0.26943	-0.281799	-3.8938	-0.0566788	-0.491508	1.47357	-4.26413	3.11583	-0.245866	0.715858	-0.782795	0.05336	-0.0785761	2.66538	-0.231148	0.528644	-3.9299	-1.74027
+	20.6785	1.79622	P11047	P11047	Laminin subunit gamma-1	LAMC1	GO:0000902;GO:0000904;GO:0006461;GO:0006928;GO:0006935;GO:0007044;GO:0007155;GO:0007411;GO:0007492;GO:0008284;GO:0009605;GO:0009653;GO:0009888;GO:0009987;GO:0016043;GO:0016477;GO:0022411;GO:0022607;GO:0022610;GO:0022617;GO:0030198;GO:0031581;GO:0031589;GO:0032502;GO:0032989;GO:0034329;GO:0034330;GO:0034446;GO:0040011;GO:0042127;GO:0042221;GO:0042330;GO:0043062;GO:0043933;GO:0048518;GO:0048522;GO:…	GO:0005198;GO:0005201;GO:0005488;GO:0008289;GO:0043208;GO:0046625;GO:0051861	GO:0005576;GO:0005604;GO:0005606;GO:0005615;GO:0031012;GO:0031982;GO:0031988;GO:0032991;GO:0043226;GO:0043227;GO:0043230;GO:0043234;GO:0043256;GO:0043259;GO:0043260;GO:0044420;GO:0044421;GO:0065010;GO:0070062	REACT_118572;REACT_163874;REACT_163906;REACT_169262;REACT_22205	62	62	52	45.1	45.1	37.7	177.6	323.31	1350100000	1921	2.24039	2.51323	1.98925	2.19673	1.98488	0.938644	1.71157	0.940742	2.39327	1.33716	2.32594	1.50508	1.81778	1.02882	3.62142	2.3515	3.15859	0.512175	3.67386	0.688857	2.20818	1.807	2.68797	2.18353	3.56661	-1.34973	1.8998	0.975662	3.61152
+	9.69282	1.79562	Q9NY47	Q9NY47	Voltage-dependent calcium channel subunit alpha-2/delta-2;Voltage-dependent calcium channel subunit alpha-2-2;Voltage-dependent calcium channel subunit delta-2	CACNA2D2	GO:0002791;GO:0006091;GO:0006112;GO:0006810;GO:0006811;GO:0006812;GO:0006816;GO:0007528;GO:0008152;GO:0009987;GO:0010646;GO:0010959;GO:0015980;GO:0016043;GO:0023051;GO:0030001;GO:0031644;GO:0032502;GO:0032879;GO:0034220;GO:0040008;GO:0040014;GO:0043269;GO:0044057;GO:0044237;GO:0044281;GO:0045927;GO:0046620;GO:0046622;GO:0046883;GO:0048468;GO:0048518;GO:0048747;GO:0048856;GO:0048869;GO:0050789;GO:…	GO:0005215;GO:0005216;GO:0005244;GO:0005245;GO:0005246;GO:0005261;GO:0005262;GO:0005488;GO:0008324;GO:0015075;GO:0015267;GO:0016247;GO:0022803;GO:0022832;GO:0022836;GO:0022838;GO:0022843;GO:0022857;GO:0022891;GO:0022892;GO:0043167;GO:0043169;GO:0046872	GO:0005886;GO:0005891;GO:0016020;GO:0032991;GO:0034702;GO:0034703;GO:0034704;GO:0043234;GO:0044425;GO:0044459;GO:0044464	REACT_13606;REACT_18325;REACT_18339	16	15	15	17.9	17.9	17.9	129.82	37.361	55652000	92	2.36557	-2.43686	1.27243	3.50084	-0.214884	-1.687	-0.601448	-2.89649	0.124037	-3.41957	1.65118	-4.70661	-1.61279	-2.40793	-0.737482	-2.11443	-1.69967	-4.39723	0.0480862	-3.21752	1.15779	-1.68544	-1.89002	-0.959056	0.454362	-6.00772	-0.565001	-3.95102	-0.872286
+	7.89505	1.79337	Q6UVK1	Q6UVK1	Chondroitin sulfate proteoglycan 4	CSPG4	GO:0000187;GO:0000271;GO:0000272;GO:0001525;GO:0001932;GO:0001934;GO:0005975;GO:0005976;GO:0006022;GO:0006023;GO:0006024;GO:0006026;GO:0006027;GO:0006464;GO:0006468;GO:0006790;GO:0006793;GO:0006796;GO:0006807;GO:0006928;GO:0007165;GO:0007166;GO:0007167;GO:0007169;GO:0008152;GO:0008283;GO:0008347;GO:0009056;GO:0009057;GO:0009058;GO:0009059;GO:0009308;GO:0009893;GO:0009966;GO:0009987;GO:0010562;GO:…	GO:0004871;GO:0005488;GO:0005515;GO:0019899;GO:0019900;GO:0019901;GO:0060089	GO:0005576;GO:0005775;GO:0005796;GO:0005887;GO:0005912;GO:0005924;GO:0005925;GO:0009986;GO:0016021;GO:0016324;GO:0030054;GO:0030055;GO:0031224;GO:0031226;GO:0031253;GO:0031256;GO:0031258;GO:0031974;GO:0031982;GO:0031988;GO:0043202;GO:0043226;GO:0043227;GO:0043230;GO:0043233;GO:0044421;GO:0044422;GO:0044424;GO:0044425;GO:0044431;GO:0044437;GO:0044444;GO:0044446;GO:0044459;GO:0044463;GO:0044464;GO:…	REACT_120800;REACT_120888;REACT_120989;REACT_121408;REACT_267648;REACT_267917;REACT_268113;REACT_268678;REACT_268749	54	54	51	35.9	35.9	33.9	250.53	323.31	140300000	217	1.99642	-1.19426	1.65639	-1.66404	0.124977	-1.39041	-0.727686	-1.99136	-1.17042	-1.68923	0.833818	0.137777	-2.04717	1.25299	1.76838	0.483976	1.15291	1.74535	0.0306396	-0.629312	-1.46815	-0.82206	-1.41276	-2.5273	1.6842	-4.37391	-1.48277	-3.77946	-0.612259
+	18.9702	1.78938	Q63ZY3	Q63ZY3	KN motif and ankyrin repeat domain-containing protein 2	KANK2	GO:0000122;GO:0006139;GO:0006351;GO:0006355;GO:0006357;GO:0006807;GO:0006915;GO:0007346;GO:0008152;GO:0008219;GO:0008285;GO:0009058;GO:0009059;GO:0009889;GO:0009890;GO:0009892;GO:0009966;GO:0009968;GO:0009987;GO:0010468;GO:0010556;GO:0010558;GO:0010564;GO:0010605;GO:0010629;GO:0010646;GO:0010648;GO:0010941;GO:0010948;GO:0012501;GO:0016070;GO:0016265;GO:0019219;GO:0019222;GO:0023051;GO:0023057;GO:…		GO:0005737;GO:0005739;GO:0043226;GO:0043227;GO:0043229;GO:0043231;GO:0044424;GO:0044444;GO:0044464		25	25	23	42	42	37.7	91.173	323.31	397920000	1039	2.30736	0.447151	1.91025	1.2359	1.82586	0.79117	1.96097	-0.559449	2.36485	-0.501529	2.23812	0.813267	-1.02004	-1.18739	1.97673	0.251179	1.54166	-1.39222	2.01288	-1.14843	3.03626	0.555943	2.39044	1.33556	1.91329	-3.63752	1.35336	-3.48093	1.84051
+	11.3659	1.78857	P51888	P51888	Prolargin	PRELP	GO:0000271;GO:0000272;GO:0001501;GO:0005975;GO:0005976;GO:0006022;GO:0006023;GO:0006024;GO:0006026;GO:0006027;GO:0006790;GO:0006807;GO:0007568;GO:0007569;GO:0008152;GO:0009056;GO:0009057;GO:0009058;GO:0009059;GO:0009308;GO:0009987;GO:0016051;GO:0016052;GO:0018146;GO:0030203;GO:0032502;GO:0042339;GO:0042340;GO:0043170;GO:0044237;GO:0044238;GO:0044248;GO:0044249;GO:0044272;GO:0044273;GO:0044281;GO:…	GO:0001871;GO:0005198;GO:0005201;GO:0005488;GO:0005539;GO:0008201;GO:0030246;GO:0030247	GO:0005576;GO:0005578;GO:0005775;GO:0005796;GO:0031012;GO:0031974;GO:0031982;GO:0031988;GO:0043202;GO:0043226;GO:0043227;GO:0043230;GO:0043233;GO:0044421;GO:0044422;GO:0044424;GO:0044431;GO:0044437;GO:0044444;GO:0044446;GO:0044464;GO:0065010;GO:0070013;GO:0070062	REACT_121120;REACT_121313;REACT_268431;REACT_268786	18	18	18	47.9	47.9	47.9	43.809	323.31	2651800000	1809	5.57166	3.84304	5.05967	3.88107	4.85581	3.64647	6.54285	0.0211306	4.64228	4.8336	5.25331	3.10771	2.24478	2.9116	4.01188	1.03075	2.82442	0.0555592	3.89064	3.1421	3.88859	4.36639	4.21787	2.51583	3.57186	0.0602818	3.56338	0.0263042	4.81965
+	5.8561	1.78763	O95445	O95445	Apolipoprotein M	APOM	GO:0001523;GO:0006629;GO:0006720;GO:0006721;GO:0006810;GO:0006869;GO:0007165;GO:0007602;GO:0007603;GO:0008152;GO:0009314;GO:0009416;GO:0009581;GO:0009582;GO:0009583;GO:0009584;GO:0009605;GO:0009628;GO:0009743;GO:0009746;GO:0009749;GO:0009892;GO:0009987;GO:0010033;GO:0010605;GO:0015918;GO:0016043;GO:0016101;GO:0019222;GO:0022607;GO:0030301;GO:0031323;GO:0031324;GO:0032268;GO:0032269;GO:0032501;GO:…	GO:0005215;GO:0005319;GO:0005488;GO:0005543;GO:0008289;GO:0016209;GO:0022892	GO:0005576;GO:0005887;GO:0016021;GO:0031224;GO:0031226;GO:0031982;GO:0031988;GO:0032991;GO:0032994;GO:0034358;GO:0034361;GO:0034362;GO:0034364;GO:0034365;GO:0034366;GO:0034385;GO:0043226;GO:0043227;GO:0043230;GO:0044421;GO:0044425;GO:0044459;GO:0044464;GO:0065010;GO:0070062	REACT_24968	6	6	6	36.7	36.7	36.7	21.253	96.563	64148000	170	1.13579	2.56291	0.957388	-0.186518	2.01634	1.70067	0.0691376	-3.55856	-1.11261	0.96976	1.02143	-0.607643	-1.30923	-4.24068	0.012991	-4.08224	-3.28168	-3.26984	1.09105	3.55907	-0.494177	-0.243111	-0.0652542	-2.0648	-1.5436	-3.53449	1.90739	-4.03361	1.7446
+	12.8676	1.78448	Q8NFX7	Q8NFX7	Syntaxin-binding protein 6	STXBP6	GO:0006810;GO:0006892;GO:0006893;GO:0008104;GO:0009987;GO:0016192;GO:0017157;GO:0031338;GO:0031503;GO:0032879;GO:0033036;GO:0033043;GO:0034613;GO:0034629;GO:0035542;GO:0043254;GO:0044087;GO:0045920;GO:0046907;GO:0048193;GO:0048519;GO:0048523;GO:0050789;GO:0050794;GO:0051046;GO:0051048;GO:0051049;GO:0051051;GO:0051128;GO:0051179;GO:0051234;GO:0051601;GO:0051641;GO:0051649;GO:0060341;GO:0060627;GO:…	GO:0005488;GO:0005515;GO:0005543;GO:0005546;GO:0008289;GO:0017016;GO:0017048;GO:0017049;GO:0019899;GO:0031267;GO:0035091;GO:0051020	GO:0000145;GO:0005886;GO:0016020;GO:0016021;GO:0031224;GO:0032991;GO:0043234;GO:0044424;GO:0044425;GO:0044444;GO:0044448;GO:0044464		6	6	6	29	29	29	23.554	43.566	20388000	65	-2.35582	-2.85451	-2.70835	-4.61663	-2.35919	-3.22547	-4.21442	-5.06638	-2.45717	-3.3473	-2.59665	-3.82232	-3.93641	-4.30141	0.210981	-3.48647	-0.35409	-4.57128	-1.58098	-3.13782	-3.74564	-4.79103	-3.93217	-3.44897	-2.32582	-4.8323	-2.20454	-3.74682	-1.32943
+	15.6143	1.77985	P04114	P04114	Apolipoprotein B-100;Apolipoprotein B-48	APOB	GO:0001523;GO:0001701;GO:0002237;GO:0002376;GO:0006066;GO:0006629;GO:0006638;GO:0006639;GO:0006641;GO:0006642;GO:0006662;GO:0006720;GO:0006721;GO:0006810;GO:0006869;GO:0006897;GO:0006898;GO:0006928;GO:0007165;GO:0007276;GO:0007283;GO:0007399;GO:0007596;GO:0007599;GO:0007602;GO:0007603;GO:0008152;GO:0008202;GO:0008203;GO:0009056;GO:0009057;GO:0009058;GO:0009059;GO:0009314;GO:0009416;GO:0009566;GO:…	GO:0001871;GO:0005102;GO:0005215;GO:0005319;GO:0005488;GO:0005515;GO:0005539;GO:0005543;GO:0008201;GO:0008289;GO:0015248;GO:0017127;GO:0019899;GO:0022892;GO:0030246;GO:0030247;GO:0035473;GO:0050750;GO:0070325	GO:0005576;GO:0005615;GO:0005737;GO:0005768;GO:0005769;GO:0005788;GO:0005789;GO:0005794;GO:0005829;GO:0005856;GO:0005886;GO:0010008;GO:0012506;GO:0015629;GO:0016020;GO:0030659;GO:0030662;GO:0030665;GO:0030666;GO:0030669;GO:0031090;GO:0031904;GO:0031974;GO:0031982;GO:0031983;GO:0031988;GO:0032991;GO:0032994;GO:0034358;GO:0034359;GO:0034360;GO:0034361;GO:0034362;GO:0034363;GO:0034385;GO:0042627;GO:…	REACT_12051;REACT_163679;REACT_163699;REACT_163813;REACT_164002;REACT_23879;REACT_24968;REACT_6841;REACT_6934	234	234	226	62.6	62.6	61.3	515.6	323.31	4322200000	9803	1.86768	4.66525	3.00805	-0.531918	4.66987	2.54043	3.74196	1.58756	3.27951	-0.620801	3.75082	2.36712	2.44725	1.06127	3.80192	1.4928	1.81188	-0.103626	4.31106	5.28325	3.11595	-0.0830784	3.33708	2.55952	2.39471	-1.07423	4.79181	1.93002	4.95309
+	13.7105	1.77963	P26006	P26006	Integrin alpha-3;Integrin alpha-3 heavy chain;Integrin alpha-3 light chain	ITGA3	GO:0001764;GO:0002376;GO:0003008;GO:0006928;GO:0007155;GO:0007160;GO:0007165;GO:0007166;GO:0007229;GO:0007507;GO:0007596;GO:0007599;GO:0007610;GO:0007611;GO:0007613;GO:0008544;GO:0009719;GO:0009725;GO:0009888;GO:0009893;GO:0009966;GO:0009968;GO:0009987;GO:0010033;GO:0010468;GO:0010604;GO:0010628;GO:0010632;GO:0010634;GO:0010646;GO:0010648;GO:0010810;GO:0010811;GO:0010975;GO:0010976;GO:0016043;GO:…	GO:0001948;GO:0002020;GO:0005488;GO:0005515;GO:0019899;GO:0043167;GO:0043169;GO:0046872;GO:0046982;GO:0046983	GO:0005886;GO:0005912;GO:0005924;GO:0005925;GO:0008305;GO:0009897;GO:0009986;GO:0016020;GO:0016323;GO:0030054;GO:0030055;GO:0030426;GO:0030427;GO:0031253;GO:0031527;GO:0031982;GO:0031988;GO:0032991;GO:0034667;GO:0043226;GO:0043227;GO:0043230;GO:0043234;GO:0043235;GO:0044421;GO:0044424;GO:0044425;GO:0044444;GO:0044456;GO:0044459;GO:0044463;GO:0044464;GO:0045202;GO:0048471;GO:0060076;GO:0065010;GO:…	REACT_12560;REACT_13552;REACT_169262	18	18	16	19.8	19.8	16.4	116.61	165.27	152400000	550	1.64304	-1.28594	1.13427	-0.0217628	0.132195	0.123524	0.529169	-1.27023	1.28248	-2.41258	1.30272	-3.28673	-1.03312	-0.991463	1.51494	-0.0791321	0.524927	-0.250441	0.73543	1.63682	1.88974	0.698887	0.436308	-1.2292	1.02908	-5.66746	0.714978	-1.34636	1.18954
+	18.7272	1.77925	P04040	P04040	Catalase	CAT	GO:0000302;GO:0001649;GO:0001657;GO:0001666;GO:0006066;GO:0006091;GO:0006139;GO:0006144;GO:0006163;GO:0006195;GO:0006355;GO:0006461;GO:0006629;GO:0006638;GO:0006639;GO:0006641;GO:0006662;GO:0006725;GO:0006753;GO:0006807;GO:0006950;GO:0006979;GO:0007568;GO:0007584;GO:0008152;GO:0008202;GO:0008203;GO:0009056;GO:0009060;GO:0009112;GO:0009117;GO:0009166;GO:0009314;GO:0009411;GO:0009416;GO:0009605;GO:…	GO:0000166;GO:0003824;GO:0004046;GO:0004096;GO:0004601;GO:0005102;GO:0005488;GO:0005506;GO:0005515;GO:0016209;GO:0016491;GO:0016684;GO:0016787;GO:0016810;GO:0016811;GO:0019899;GO:0020037;GO:0042802;GO:0042803;GO:0043167;GO:0043169;GO:0046872;GO:0046906;GO:0046914;GO:0046983;GO:0048037;GO:0050661;GO:0050662	GO:0000323;GO:0005758;GO:0005764;GO:0005773;GO:0005777;GO:0005778;GO:0005782;GO:0005783;GO:0005794;GO:0005829;GO:0005886;GO:0005912;GO:0005924;GO:0005925;GO:0016020;GO:0030054;GO:0030055;GO:0031090;GO:0031903;GO:0031907;GO:0031970;GO:0031974;GO:0031982;GO:0031988;GO:0042579;GO:0043226;GO:0043227;GO:0043229;GO:0043230;GO:0043231;GO:0043233;GO:0044421;GO:0044422;GO:0044424;GO:0044429;GO:0044438;GO:…	REACT_2086;REACT_264249	43	43	43	76.3	76.3	76.3	59.755	323.31	4599800000	3927	3.77537	4.0825	3.96508	4.22107	4.89324	2.78019	4.63482	2.80104	5.07586	1.92473	4.51933	2.6654	3.01608	0.825195	4.73958	2.32005	3.49301	0.975422	5.04515	6.01682	5.5348	4.00554	4.23029	3.86556	4.10105	1.1526	5.14365	3.15253	4.14152
+	9.80266	1.77845	P02042	P02042	Hemoglobin subunit delta	HBD	GO:0007596;GO:0007599;GO:0032501;GO:0050817;GO:0050878;GO:0065007;GO:0065008	GO:0005215;GO:0005344;GO:0005488;GO:0005506;GO:0019825;GO:0020037;GO:0022892;GO:0043167;GO:0043169;GO:0046872;GO:0046906;GO:0046914	GO:0005829;GO:0005833;GO:0032991;GO:0043234;GO:0044421;GO:0044424;GO:0044444;GO:0044445;GO:0044464;GO:0072562	REACT_24970	30	21	19	100	95.9	95.9	16.055	323.31	13405000000	2269	6.70327	7.55934	6.59704	7.74992	8.18653	6.71001	8.04812	6.24817	8.4528	6.31367	7.2038	5.61595	3.9997	1.71724	7.58754	4.4467	4.97667	3.30839	7.75618	9.08947	6.83219	6.60506	5.7969	6.41503	6.39991	1.86214	7.18295	5.15119	6.74955
+	17.5058	1.76554	P11171	P11171	Protein 4.1	EPB41	GO:0003008;GO:0003013;GO:0006996;GO:0007010;GO:0008015;GO:0009987;GO:0016043;GO:0030029;GO:0030036;GO:0030865;GO:0030866;GO:0032092;GO:0032501;GO:0043393;GO:0044093;GO:0051098;GO:0051099;GO:0065007;GO:0065009;GO:0071840;GO:0071841;GO:0071842	GO:0005198;GO:0005200;GO:0005488;GO:0005515;GO:0005543;GO:0005545;GO:0008092;GO:0008289;GO:0030507;GO:0035091	GO:0005634;GO:0005794;GO:0005856;GO:0005886;GO:0008091;GO:0014731;GO:0016020;GO:0019898;GO:0030863;GO:0032991;GO:0043226;GO:0043227;GO:0043228;GO:0043229;GO:0043231;GO:0043232;GO:0043234;GO:0044422;GO:0044424;GO:0044425;GO:0044430;GO:0044444;GO:0044446;GO:0044448;GO:0044464		37	37	31	45.9	45.9	35.3	97.016	177.66	325150000	919	0.309299	0.64897	0.782639	-0.775156	2.16618	0.760088	1.67199	-0.770612	2.61865	-0.421462	1.56886	-0.495049	0.451965	-1.50292	1.94013	-0.719826	0.402187	-0.953411	2.29215	3.16129	2.5892	-0.258366	0.654966	1.34726	0.93307	-2.46578	1.78459	0.274521	1.42578
+	7.36539	1.7611	P00739	P00739	Haptoglobin-related protein	HPR	GO:0002230;GO:0002682;GO:0002697;GO:0002831;GO:0006810;GO:0006897;GO:0006898;GO:0009987;GO:0010324;GO:0016043;GO:0016044;GO:0016192;GO:0031347;GO:0043900;GO:0048583;GO:0050688;GO:0050691;GO:0050789;GO:0051234;GO:0061024;GO:0065007;GO:0071840;GO:0080134	GO:0003824;GO:0005488;GO:0005515;GO:0030492	GO:0005576;GO:0031982;GO:0031988;GO:0032991;GO:0032994;GO:0034358;GO:0034364;GO:0034366;GO:0043226;GO:0043227;GO:0043230;GO:0044421;GO:0065010;GO:0070062;GO:0072562	REACT_160163	25	8	8	55.7	28.4	28.4	39.029	76.261	145740000	349	-1.26536	0.918398	2.43412	1.07839	3.31589	1.67354	2.35655	-0.680871	3.37932	1.09779	3.80042	2.74589	0.938765	-0.417957	2.84025	0.140713	1.18691	-1.23981	3.46956	5.16419	0.274424	-1.23999	-2.60522	-2.11519	2.04707	-3.54369	2.85316	1.30843	3.85182
+	12.0626	1.76093	Q8N335	Q8N335	Glycerol-3-phosphate dehydrogenase 1-like protein	GPD1L	GO:0001932;GO:0001933;GO:0002027;GO:0002028;GO:0003254;GO:0005975;GO:0006066;GO:0006071;GO:0006072;GO:0006082;GO:0006139;GO:0006629;GO:0006638;GO:0006639;GO:0006641;GO:0006644;GO:0006650;GO:0006654;GO:0006662;GO:0006732;GO:0006733;GO:0006734;GO:0006753;GO:0006793;GO:0006796;GO:0006807;GO:0006937;GO:0006942;GO:0008016;GO:0008152;GO:0008610;GO:0008654;GO:0009056;GO:0009058;GO:0009117;GO:0009892;GO:…	GO:0000166;GO:0003824;GO:0004367;GO:0005488;GO:0005515;GO:0016247;GO:0016491;GO:0016614;GO:0016616;GO:0017080;GO:0044325;GO:0048037;GO:0050662;GO:0051287	GO:0005829;GO:0005886;GO:0009331;GO:0016020;GO:0031982;GO:0031988;GO:0032991;GO:0043226;GO:0043227;GO:0043230;GO:0043234;GO:0044421;GO:0044424;GO:0044444;GO:0044464;GO:0065010;GO:0070062	REACT_1190;REACT_120906	16	16	14	59	59	50.7	38.418	218.37	284160000	484	2.17639	-0.239294	2.06241	-0.0921783	1.69735	1.38412	2.44994	-0.852767	2.56726	-0.182874	1.65518	-3.05954	0.215136	-1.1453	2.46357	0.755091	2.07413	-0.974987	2.02196	-0.616067	1.57997	-1.18282	1.70559	2.00318	2.57517	-1.81695	2.53657	0.128113	2.59569
+	8.71717	1.76093	Q9H4X1	Q9H4X1	Regulator of cell cycle RGCC	RGCC	GO:0000079;GO:0001100;GO:0001666;GO:0001775;GO:0001816;GO:0001817;GO:0001818;GO:0001932;GO:0001936;GO:0001937;GO:0002252;GO:0002253;GO:0002376;GO:0002682;GO:0002684;GO:0003330;GO:0003331;GO:0006355;GO:0006357;GO:0006950;GO:0006955;GO:0006956;GO:0006959;GO:0007050;GO:0007088;GO:0007096;GO:0007162;GO:0007346;GO:0008152;GO:0008285;GO:0009889;GO:0009891;GO:0009893;GO:0009987;GO:0010468;GO:0010556;GO:…	GO:0005488;GO:0005515;GO:0008047;GO:0019207;GO:0019209;GO:0019887;GO:0019899;GO:0019900;GO:0019901;GO:0030234;GO:0030295;GO:0046332;GO:0070412	GO:0005634;GO:0005737;GO:0005813;GO:0005815;GO:0043226;GO:0043227;GO:0043228;GO:0043229;GO:0043231;GO:0043232;GO:0044422;GO:0044424;GO:0044430;GO:0044444;GO:0044446;GO:0044464		7	7	7	59.9	59.9	59.9	14.559	198.27	28162000	194	1.05071	-4.40447	-0.523415	-1.01412	-1.74498	-1.71234	0.158003	-3.06384	-0.20966	-1.08405	0.34671	-2.58365	-5.23013	-5.61787	-0.0495815	-1.69349	-0.443354	-3.94362	-1.40075	-4.34271	1.37523	-0.656553	0.0221558	-4.51712	-0.738095	-3.50266	-1.83022	-3.71174	-2.87944
+	12.2191	1.75426	Q9P266	Q9P266	Junctional protein associated with coronary artery disease	KIAA1462	GO:0007155;GO:0009987;GO:0022610		GO:0005911;GO:0005912;GO:0030054;GO:0070161		9	9	9	11.8	11.8	11.8	148.35	48.109	21612000	63	0.234319	-3.19264	-0.964558	-2.09901	-2.92063	-3.25252	-4.33299	-4.66408	-2.10342	-3.2067	-1.51091	-3.61155	-4.3515	-4.69888	0.709797	-2.93979	0.167423	-6.01045	-1.18468	-4.98165	-3.58544	-4.1335	-2.49286	-3.90015	-1.55516	-4.49262	-1.74645	-3.49584	-1.58586
+	16.5996	1.75146	P01023;CON__ENSEMBL:ENSBTAP00000024146	P01023	Alpha-2-macroglobulin	A2M	GO:0001775;GO:0001868;GO:0001869;GO:0002576;GO:0002673;GO:0002682;GO:0002683;GO:0002697;GO:0002698;GO:0002920;GO:0002921;GO:0006810;GO:0006887;GO:0007165;GO:0007264;GO:0007596;GO:0007597;GO:0007599;GO:0008152;GO:0009892;GO:0009966;GO:0009987;GO:0010466;GO:0010468;GO:0010605;GO:0010951;GO:0010955;GO:0016043;GO:0016192;GO:0019222;GO:0019538;GO:0022411;GO:0022617;GO:0023051;GO:0030154;GO:0030168;GO:…	GO:0002020;GO:0004857;GO:0004866;GO:0004867;GO:0005102;GO:0005488;GO:0005515;GO:0019838;GO:0019899;GO:0019955;GO:0019956;GO:0019958;GO:0019959;GO:0019966;GO:0030234;GO:0030414;GO:0043120;GO:0048306;GO:0061134;GO:0061135	GO:0005576;GO:0005829;GO:0031093;GO:0031974;GO:0031982;GO:0031983;GO:0031988;GO:0034774;GO:0043226;GO:0043227;GO:0043230;GO:0043233;GO:0044421;GO:0044422;GO:0044424;GO:0044433;GO:0044444;GO:0044446;GO:0044464;GO:0060205;GO:0065010;GO:0070062;GO:0072562	REACT_11051;REACT_118572;REACT_13621;REACT_318;REACT_326	83	83	72	69.4	69.4	60.7	163.29	323.31	10392000000	7271	5.4501	5.78464	4.81693	2.16445	6.28468	4.97253	6.64877	4.11311	5.98442	2.53606	5.46127	3.92647	4.15929	2.49454	5.57911	3.1587	4.83826	3.2401	6.13916	7.38009	5.12791	3.02248	5.18451	4.78547	4.92139	0.838499	6.33078	2.96275	6.18517
+	15.9811	1.75145	Q8ND71	Q8ND71	GTPase IMAP family member 8	GIMAP8		GO:0000166;GO:0005488;GO:0005525;GO:0017076;GO:0019001;GO:0032553;GO:0032555;GO:0032561;GO:0035639	GO:0005654;GO:0005737;GO:0005739;GO:0005783;GO:0005794;GO:0005829;GO:0043226;GO:0043227;GO:0043229;GO:0043231;GO:0044422;GO:0044424;GO:0044428;GO:0044444;GO:0044446;GO:0044464		10	10	9	22	22	18.9	74.889	19.937	26833000	86	-2.21426	-1.87424	-0.972031	-2.06373	-1.62968	-4.38834	-0.935688	-4.27239	0.631437	-3.16887	-1.50875	-2.23413	-1.24276	-3.95521	-0.494839	-1.08994	-0.410122	-3.7826	-0.180471	-3.88434	-4.70011	-2.06776	-1.42967	-3.27041	-3.05663	-4.47434	-0.813201	-3.3443	-1.05878
+	14.0693	1.74986	P52943	P52943	Cysteine-rich protein 2	CRIP2	GO:0008284;GO:0030097;GO:0032502;GO:0042127;GO:0048513;GO:0048518;GO:0048522;GO:0048534;GO:0048856;GO:0050789;GO:0050794;GO:0065007	GO:0005488;GO:0008270;GO:0043167;GO:0043169;GO:0046872;GO:0046914	GO:0005938;GO:0044424;GO:0044444;GO:0044464		11	11	8	61.5	61.5	43.3	22.492	323.31	482220000	398	4.31758	-1.61239	4.07843	1.52162	3.61623	2.91061	3.54005	-0.0646944	3.32826	1.70121	3.67545	0.79579	0.939589	0.944834	3.92516	1.60049	3.125	1.36527	3.1608	0.480371	2.68545	1.89932	4.29728	1.83056	4.00008	-0.911024	3.191	0.212896	3.83738
+	19.914	1.7462	P50148	P50148	Guanine nucleotide-binding protein G(q) subunit alpha	GNAQ	GO:0001501;GO:0001508;GO:0001775;GO:0001932;GO:0006140;GO:0006469;GO:0006873;GO:0007165;GO:0007166;GO:0007186;GO:0007187;GO:0007188;GO:0007189;GO:0007190;GO:0007200;GO:0007202;GO:0007212;GO:0007215;GO:0007507;GO:0007596;GO:0007599;GO:0007610;GO:0008152;GO:0009653;GO:0009791;GO:0009889;GO:0009894;GO:0009987;GO:0010468;GO:0010517;GO:0010518;GO:0010578;GO:0010579;GO:0010608;GO:0010863;GO:0016322;GO:…	GO:0000166;GO:0001664;GO:0003824;GO:0003924;GO:0004871;GO:0005096;GO:0005102;GO:0005488;GO:0005515;GO:0005525;GO:0008047;GO:0016462;GO:0016787;GO:0016817;GO:0016818;GO:0017076;GO:0017111;GO:0019001;GO:0030234;GO:0030695;GO:0031683;GO:0031821;GO:0031826;GO:0032403;GO:0032553;GO:0032555;GO:0032561;GO:0035639;GO:0043167;GO:0043169;GO:0046872;GO:0060089;GO:0060589	GO:0005737;GO:0005765;GO:0005774;GO:0005834;GO:0005886;GO:0016020;GO:0019897;GO:0019898;GO:0031090;GO:0031234;GO:0031965;GO:0031982;GO:0031988;GO:0032991;GO:0043226;GO:0043227;GO:0043230;GO:0043234;GO:0044421;GO:0044422;GO:0044424;GO:0044425;GO:0044428;GO:0044437;GO:0044444;GO:0044446;GO:0044459;GO:0044464;GO:0065010;GO:0070062	REACT_18283;REACT_18405;REACT_19140;REACT_19193;REACT_20647;REACT_21384	19	11	11	52.9	28.1	28.1	42.142	74.525	133080000	372	1.30865	0.808195	0.990797	-0.25943	0.778793	-0.156719	1.47888	-0.687686	1.75484	-2.17976	1.16375	-0.428762	-2.28322	-0.604761	1.90112	-0.675781	1.47134	-1.15511	1.59987	-0.184167	1.50835	-1.24507	1.79818	1.00819	1.95086	-0.826754	1.90374	0.115244	1.94485
+	8.67107	1.74425	P02743	P02743	Serum amyloid P-component;Serum amyloid P-component(1-203)	APCS	GO:0002376;GO:0002526;GO:0002673;GO:0002674;GO:0002682;GO:0002761;GO:0002762;GO:0006457;GO:0006461;GO:0006950;GO:0006952;GO:0006953;GO:0006954;GO:0006955;GO:0008152;GO:0009611;GO:0009987;GO:0016043;GO:0019538;GO:0022607;GO:0031347;GO:0031348;GO:0032101;GO:0032102;GO:0034621;GO:0034622;GO:0040012;GO:0043170;GO:0043623;GO:0043900;GO:0043903;GO:0043933;GO:0044237;GO:0044238;GO:0044260;GO:0044267;GO:…	GO:0001846;GO:0001848;GO:0001849;GO:0005488;GO:0005509;GO:0005515;GO:0030246;GO:0043167;GO:0043169;GO:0046790;GO:0046872;GO:0051082	GO:0005576;GO:0005615;GO:0005634;GO:0031982;GO:0031988;GO:0032991;GO:0043226;GO:0043227;GO:0043229;GO:0043230;GO:0043231;GO:0043234;GO:0044421;GO:0044424;GO:0044464;GO:0065010;GO:0070062;GO:0072562	REACT_75925	16	16	16	55.6	55.6	55.6	25.387	323.31	3537500000	1290	4.2165	5.24668	4.86236	1.65423	3.84312	2.25013	5.54854	0.929963	5.53082	4.20378	5.49442	4.82315	2.50518	1.21573	5.47822	3.86897	4.47157	1.64866	5.91486	5.64469	3.75289	2.67338	4.94207	3.99448	5.37983	-1.45115	4.7065	1.83155	5.08216
+	10.6458	1.7405	Q15746	Q15746	Myosin light chain kinase, smooth muscle;Myosin light chain kinase, smooth muscle, deglutamylated form	MYLK	GO:0002230;GO:0002682;GO:0002697;GO:0002831;GO:0003008;GO:0003012;GO:0006464;GO:0006468;GO:0006793;GO:0006796;GO:0006936;GO:0006939;GO:0006950;GO:0006970;GO:0006971;GO:0006996;GO:0007010;GO:0007015;GO:0007165;GO:0007264;GO:0008152;GO:0009628;GO:0009653;GO:0009987;GO:0010959;GO:0014820;GO:0016043;GO:0016310;GO:0019538;GO:0022607;GO:0030029;GO:0030030;GO:0030031;GO:0030036;GO:0030334;GO:0030335;GO:…	GO:0000166;GO:0003824;GO:0004672;GO:0004674;GO:0004683;GO:0004687;GO:0005488;GO:0005524;GO:0016301;GO:0016740;GO:0016772;GO:0016773;GO:0017076;GO:0030554;GO:0032553;GO:0032555;GO:0032559;GO:0035639;GO:0043167;GO:0043169;GO:0046872	GO:0001725;GO:0005737;GO:0005829;GO:0005911;GO:0030027;GO:0030054;GO:0031982;GO:0031988;GO:0032154;GO:0032155;GO:0032432;GO:0042641;GO:0042995;GO:0043226;GO:0043227;GO:0043230;GO:0044421;GO:0044422;GO:0044424;GO:0044430;GO:0044444;GO:0044446;GO:0044464;GO:0065010;GO:0070062	REACT_20558;REACT_355347	59	59	56	34.6	34.6	31.8	210.71	323.31	603120000	1156	2.02119	0.426758	1.73439	-1.38224	1.17688	0.341362	2.81612	-2.41698	2.61694	-0.916179	2.41067	1.2827	0.0417519	0.331205	3.02177	1.55181	2.82241	0.702879	3.22866	-0.846255	1.34603	-1.33669	2.70367	1.87256	3.15135	-2.70537	2.64681	-1.79566	2.53507
+	8.56365	1.73854	P11233	P11233	Ras-related protein Ral-A	RALA	GO:0000910;GO:0006810;GO:0006887;GO:0006935;GO:0006996;GO:0007010;GO:0007165;GO:0007166;GO:0007167;GO:0007169;GO:0007264;GO:0007265;GO:0009605;GO:0009987;GO:0016032;GO:0016043;GO:0016192;GO:0017157;GO:0030029;GO:0030036;GO:0031344;GO:0031346;GO:0031532;GO:0032879;GO:0032940;GO:0035556;GO:0040011;GO:0042221;GO:0042330;GO:0044087;GO:0046903;GO:0048011;GO:0048518;GO:0048522;GO:0050789;GO:0050794;GO:…	GO:0000166;GO:0001664;GO:0003824;GO:0003924;GO:0005102;GO:0005488;GO:0005515;GO:0005525;GO:0008092;GO:0016462;GO:0016787;GO:0016817;GO:0016818;GO:0017022;GO:0017076;GO:0017111;GO:0019001;GO:0019003;GO:0019899;GO:0031625;GO:0031753;GO:0031755;GO:0032553;GO:0032555;GO:0032561;GO:0035639;GO:0051117	GO:0005886;GO:0005912;GO:0005924;GO:0005925;GO:0009986;GO:0012506;GO:0016020;GO:0030054;GO:0030055;GO:0030496;GO:0030659;GO:0031090;GO:0031982;GO:0031988;GO:0032154;GO:0032155;GO:0043226;GO:0043227;GO:0043230;GO:0044421;GO:0044422;GO:0044424;GO:0044433;GO:0044444;GO:0044446;GO:0044464;GO:0065010;GO:0070062;GO:0070161	REACT_12065;REACT_147867	6	3	3	52.4	21.4	21.4	23.567	33.642	75378000	166	0.495162	-1.97898	-0.708485	-0.871187	-0.951488	-2.69051	-0.731544	-1.64875	-1.51542	-4.98925	-0.192719	-0.596334	-3.60513	-1.2164	2.25893	-1.14218	1.52748	-1.10468	2.19387	-1.77779	2.89635	0.314634	1.25123	-2.4897	1.65481	-1.70772	1.57525	1.07559	1.39468
+	11.6043	1.73427	P00738	P00738	Haptoglobin;Haptoglobin alpha chain;Haptoglobin beta chain	HP	GO:0000302;GO:0002376;GO:0002526;GO:0006810;GO:0006897;GO:0006898;GO:0006950;GO:0006952;GO:0006953;GO:0006954;GO:0006979;GO:0009607;GO:0009611;GO:0009617;GO:0009892;GO:0009894;GO:0009895;GO:0009987;GO:0010035;GO:0010310;GO:0010324;GO:0010727;GO:0010941;GO:0010942;GO:0016043;GO:0016044;GO:0016192;GO:0019222;GO:0031323;GO:0031324;GO:0031329;GO:0031330;GO:0042221;GO:0042542;GO:0042742;GO:0043086;GO:…	GO:0003824;GO:0005488;GO:0005515;GO:0016209;GO:0030492	GO:0005576;GO:0005615;GO:0031838;GO:0031974;GO:0031982;GO:0031983;GO:0031988;GO:0032991;GO:0043226;GO:0043227;GO:0043230;GO:0043233;GO:0043234;GO:0044421;GO:0044422;GO:0044424;GO:0044433;GO:0044444;GO:0044446;GO:0044464;GO:0060205;GO:0065010;GO:0070062;GO:0071682;GO:0072562	REACT_160163	33	33	14	70.2	70.2	40.6	45.205	323.31	9277100000	3087	4.88667	6.05562	5.36817	3.85927	6.38949	4.67308	6.92605	4.65704	6.17302	3.94182	7.01137	5.25196	4.79988	2.77161	6.44303	3.89336	4.60801	1.7944	5.74432	7.19659	5.57696	3.17562	6.05915	5.42054	5.00705	0.563383	7.18758	4.39813	6.04885
+	27.7577	1.73215	P35241	P35241	Radixin	RDX	GO:0001885;GO:0002064;GO:0008064;GO:0008104;GO:0008105;GO:0009893;GO:0009987;GO:0010468;GO:0010604;GO:0010628;GO:0010639;GO:0016043;GO:0019222;GO:0022607;GO:0030030;GO:0030031;GO:0030033;GO:0030832;GO:0030833;GO:0030834;GO:0030835;GO:0030837;GO:0031333;GO:0032271;GO:0032272;GO:0032502;GO:0032528;GO:0032535;GO:0032956;GO:0032970;GO:0033036;GO:0033043;GO:0043242;GO:0043244;GO:0043254;GO:0044087;GO:…		GO:0001726;GO:0005615;GO:0005737;GO:0005856;GO:0005886;GO:0005902;GO:0005912;GO:0005924;GO:0005925;GO:0016020;GO:0019898;GO:0030027;GO:0030054;GO:0030055;GO:0030175;GO:0030315;GO:0031982;GO:0031988;GO:0032154;GO:0032155;GO:0032420;GO:0042995;GO:0043226;GO:0043227;GO:0043228;GO:0043229;GO:0043230;GO:0043232;GO:0044421;GO:0044422;GO:0044424;GO:0044425;GO:0044459;GO:0044464;GO:0045177;GO:0051286;GO:…	REACT_22365	54	41	40	70.5	54.5	53.2	68.563	323.31	536580000	1638	2.05571	-0.80036	1.57788	-1.42267	1.1842	0.20738	1.21678	-0.13664	1.47558	-1.14252	1.92031	-0.843449	-0.008255	-0.846676	2.37293	0.427877	2.03131	-0.897724	1.74009	-0.168052	3.21564	-0.33329	1.40182	0.724908	1.56082	-0.213869	1.64497	0.143597	1.72382
+	6.54229	1.7277	Q8WWA0	Q8WWA0	Intelectin-1	ITLN1	GO:0001932;GO:0001934;GO:0009607;GO:0009624;GO:0009893;GO:0010562;GO:0010604;GO:0010827;GO:0010828;GO:0019220;GO:0019222;GO:0031323;GO:0031325;GO:0031399;GO:0031401;GO:0032268;GO:0032270;GO:0032879;GO:0042325;GO:0042327;GO:0045937;GO:0046324;GO:0046326;GO:0048518;GO:0048522;GO:0050789;GO:0050794;GO:0050896;GO:0051049;GO:0051050;GO:0051174;GO:0051246;GO:0051247;GO:0051704;GO:0051707;GO:0060255;GO:…	GO:0005488;GO:0030246	GO:0031224;GO:0031225;GO:0031253;GO:0031526;GO:0031982;GO:0031988;GO:0032991;GO:0043226;GO:0043227;GO:0043230;GO:0043234;GO:0043235;GO:0044421;GO:0044425;GO:0044459;GO:0044463;GO:0044464;GO:0045121;GO:0065010;GO:0070062		9	9	5	35.5	35.5	21.7	34.961	136.68	32092000	77	-3.23914	-4.09857	-2.75471	-4.73698	-3.20977	-5.07996	0.674618	-4.38489	-3.61446	-4.95315	-1.77284	-3.29262	-5.45686	-4.21533	-3.0656	-3.4634	-5.81955	-7.05017	-3.1197	-3.91707	-5.79612	-4.07644	-4.70568	-4.34089	-4.83866	-4.48133	2.41821	-8.94463	3.72928
+	10.0268	1.72335	P35749	P35749	Myosin-11	MYH11	GO:0003008;GO:0003012;GO:0006461;GO:0006935;GO:0006936;GO:0006939;GO:0006996;GO:0007010;GO:0007165;GO:0007166;GO:0007167;GO:0007169;GO:0007264;GO:0007411;GO:0009605;GO:0009987;GO:0010927;GO:0016043;GO:0022607;GO:0030029;GO:0030036;GO:0030198;GO:0030241;GO:0031033;GO:0031034;GO:0032501;GO:0032502;GO:0034621;GO:0034622;GO:0035556;GO:0040011;GO:0042221;GO:0042330;GO:0043062;GO:0043623;GO:0043933;GO:…	GO:0000166;GO:0003774;GO:0003824;GO:0005198;GO:0005488;GO:0005524;GO:0008307;GO:0016462;GO:0016787;GO:0016817;GO:0016818;GO:0017076;GO:0017111;GO:0030554;GO:0032553;GO:0032555;GO:0032559;GO:0035639	GO:0001725;GO:0005829;GO:0005859;GO:0016023;GO:0016459;GO:0016460;GO:0030485;GO:0031410;GO:0031982;GO:0031988;GO:0032432;GO:0032982;GO:0032991;GO:0042470;GO:0042641;GO:0043226;GO:0043227;GO:0043228;GO:0043229;GO:0043230;GO:0043231;GO:0043232;GO:0043234;GO:0043292;GO:0044421;GO:0044422;GO:0044424;GO:0044430;GO:0044444;GO:0044446;GO:0044449;GO:0044464;GO:0048770;GO:0065010;GO:0070062	REACT_19277;REACT_20558;REACT_264548;REACT_355192;REACT_355303;REACT_355347;REACT_355542	196	177	169	71.6	66.4	62	227.34	323.31	4756700000	7902	1.70002	1.04887	3.8677	0.378929	2.87848	1.71268	2.61012	2.9403	3.49987	0.603669	2.96192	1.72888	0.156939	-0.797234	3.18081	1.62515	3.46418	-1.79575	3.86691	1.40305	3.17471	0.758268	5.13524	0.462379	5.10963	-0.729872	1.19536	0.75905	2.44582
+	14.6344	1.71403	P27338	P27338	Amine oxidase [flavin-containing] B	MAOB	GO:0002237;GO:0006066;GO:0006576;GO:0006584;GO:0006725;GO:0006805;GO:0006807;GO:0008152;GO:0009056;GO:0009058;GO:0009308;GO:0009310;GO:0009607;GO:0009636;GO:0009712;GO:0009719;GO:0009725;GO:0009893;GO:0009987;GO:0010033;GO:0010035;GO:0010038;GO:0010044;GO:0010269;GO:0010646;GO:0014062;GO:0014063;GO:0018958;GO:0019222;GO:0019614;GO:0021762;GO:0023051;GO:0031323;GO:0031325;GO:0031960;GO:0032496;GO:…	GO:0003824;GO:0005488;GO:0008131;GO:0009055;GO:0016491;GO:0016638;GO:0016641;GO:0048037;GO:0050660;GO:0050662	GO:0005739;GO:0005740;GO:0005741;GO:0005743;GO:0016020;GO:0016021;GO:0019866;GO:0019867;GO:0031090;GO:0031224;GO:0031966;GO:0031967;GO:0031968;GO:0031975;GO:0031982;GO:0031988;GO:0043226;GO:0043227;GO:0043229;GO:0043230;GO:0043231;GO:0044421;GO:0044422;GO:0044424;GO:0044425;GO:0044429;GO:0044444;GO:0044446;GO:0044464;GO:0065010;GO:0070062	REACT_416	19	17	15	50.2	47.9	43.3	58.762	177.86	965590000	724	3.05851	2.42342	3.19888	1.56266	3.54258	2.28653	3.72753	1.17103	4.14688	0.757472	3.49502	2.65989	2.18832	0.101692	4.07036	1.55977	3.55945	3.27767	3.8298	2.16251	3.34585	1.69949	3.53629	3.66513	4.00814	-0.642185	3.50086	2.0535	4.05704
+	9.8582	1.70621	Q13751	Q13751	Laminin subunit beta-3	LAMB3	GO:0007044;GO:0007155;GO:0008544;GO:0009888;GO:0009987;GO:0016043;GO:0022411;GO:0022607;GO:0022610;GO:0022617;GO:0030154;GO:0030198;GO:0031581;GO:0032502;GO:0034329;GO:0034330;GO:0035987;GO:0043062;GO:0045444;GO:0048856;GO:0048869;GO:0050873;GO:0071840;GO:0071841;GO:0071842;GO:0071844;GO:0071845	GO:0005198	GO:0005576;GO:0005610;GO:0032991;GO:0043234;GO:0043256;GO:0044420;GO:0044421	REACT_118572;REACT_150180;REACT_150268;REACT_163874;REACT_169262;REACT_20537	40	40	39	46.5	46.5	45.6	129.57	323.31	1110200000	1487	2.71035	4.52444	2.20039	2.2377	1.84748	0.82316	1.72995	1.04944	2.93423	0.670194	3.27609	1.65466	1.58812	3.22626	5.12021	3.54935	4.47319	3.07728	5.03624	3.05295	3.95498	3.3387	3.19067	3.50154	5.03082	0.016922	3.32616	2.25535	4.83639
+	2.92601	1.70512	Q9Y279	Q9Y279	V-set and immunoglobulin domain-containing protein 4	VSIG4	GO:0001817;GO:0001818;GO:0002252;GO:0002253;GO:0002376;GO:0002682;GO:0002683;GO:0002684;GO:0002694;GO:0002695;GO:0006950;GO:0006952;GO:0006955;GO:0006956;GO:0006957;GO:0006959;GO:0008152;GO:0008285;GO:0019538;GO:0032663;GO:0032703;GO:0032944;GO:0032945;GO:0042127;GO:0042129;GO:0042130;GO:0043170;GO:0044238;GO:0045087;GO:0048518;GO:0048519;GO:0048523;GO:0048583;GO:0048584;GO:0050670;GO:0050672;GO:…		GO:0016021;GO:0031224;GO:0031982;GO:0031988;GO:0043226;GO:0043227;GO:0043230;GO:0044421;GO:0044425;GO:0044464;GO:0065010;GO:0070062		8	8	7	30.1	30.1	22.8	43.987	14.627	329350000	61	1.97446	6.50386	2.00762	0.709127	1.815	0.921593	1.51104	-0.599069	1.34119	-4.40901	1.20867	2.58135	1.47368	-5.68917	-3.66713	-4.91368	1.90022	1.11342	-3.60205	-3.26422	3.49929	2.97598	1.49436	-4.62178	1.52976	-4.49757	3.10256	-3.10387	-4.78606
+	6.27584	1.7042	Q9H239	Q9H239	Matrix metalloproteinase-28	MMP28	GO:0002682;GO:0002683;GO:0002685;GO:0002686;GO:0002688;GO:0002689;GO:0010758;GO:0010760;GO:0030334;GO:0030336;GO:0032101;GO:0032102;GO:0032879;GO:0040012;GO:0040013;GO:0048519;GO:0048521;GO:0048523;GO:0048583;GO:0048585;GO:0050789;GO:0050794;GO:0050795;GO:0050920;GO:0050922;GO:0051270;GO:0051271;GO:0065007;GO:2000145;GO:2000146	GO:0003824;GO:0004175;GO:0004222;GO:0005488;GO:0005509;GO:0008233;GO:0008237;GO:0008270;GO:0016787;GO:0043167;GO:0043169;GO:0046872;GO:0046914;GO:0070011	GO:0005578;GO:0005737;GO:0031012;GO:0044421;GO:0044424;GO:0044464		9	9	9	28.7	28.7	28.7	58.938	100.46	91082000	185	-2.02211	-1.45861	-2.39046	-2.62661	-2.15437	-2.96283	-1.39187	-2.6568	-1.03228	-1.32196	-2.59548	-0.945753	-3.16962	-3.22089	0.0886993	-0.896149	2.0417	-3.76264	2.86965	-0.202918	-1.75966	-3.84775	0.760477	-2.90641	2.24007	-3.88013	-1.53446	-2.41494	1.15554
+	4.43827	1.69977	P02100	P02100	Hemoglobin subunit epsilon	HBE1	GO:0000122;GO:0006355;GO:0006357;GO:0006461;GO:0007596;GO:0007599;GO:0009889;GO:0009890;GO:0009892;GO:0010468;GO:0010556;GO:0010558;GO:0010605;GO:0010629;GO:0016043;GO:0019219;GO:0019222;GO:0022607;GO:0031323;GO:0031324;GO:0031326;GO:0031327;GO:0032501;GO:0043933;GO:0045892;GO:0045934;GO:0048519;GO:0048523;GO:0050789;GO:0050794;GO:0050817;GO:0050878;GO:0051171;GO:0051172;GO:0051252;GO:0051253;GO:…	GO:0005215;GO:0005344;GO:0005488;GO:0005506;GO:0019825;GO:0020037;GO:0022892;GO:0043167;GO:0043169;GO:0046872;GO:0046906;GO:0046914	GO:0005829;GO:0005833;GO:0032991;GO:0043234;GO:0044421;GO:0044424;GO:0044444;GO:0044445;GO:0044464;GO:0072562	REACT_24970	4	2	2	33.3	27.2	27.2	16.203	1.8136	47464000	80	-0.624724	0.549932	-1.85951	-0.536957	-3.78527	-4.50373	-4.05593	-2.20739	3.24467	-2.1565	-3.51999	-1.41501	-1.18434	-5.2211	2.41003	-3.55296	-2.57256	-5.8863	0.699667	4.84301	-1.22129	-4.06291	-5.37176	-1.15726	0.32083	-6.15233	-0.824018	1.01038	-2.28071
+	10.9348	1.69512	Q5U651	Q5U651	Ras-interacting protein 1	RASIP1	GO:0001525;GO:0001570;GO:0001763;GO:0006140;GO:0007165;GO:0009653;GO:0009892;GO:0009894;GO:0009895;GO:0009987;GO:0010506;GO:0010507;GO:0019219;GO:0019222;GO:0030154;GO:0030811;GO:0031323;GO:0031324;GO:0031329;GO:0031330;GO:0032501;GO:0032502;GO:0033121;GO:0033124;GO:0035239;GO:0043087;GO:0048519;GO:0048523;GO:0048646;GO:0048754;GO:0048869;GO:0050789;GO:0050790;GO:0050794;GO:0050896;GO:0051171;GO:…		GO:0005795;GO:0044422;GO:0044424;GO:0044431;GO:0044444;GO:0044446;GO:0044464;GO:0048471		15	15	15	22.7	22.7	22.7	103.46	195.06	85370000	156	0.748429	-2.13021	0.140352	-0.698349	-1.37649	-1.36526	-1.71831	-1.52607	-0.228621	-0.335559	0.10034	-0.172781	-1.57544	-3.27965	1.84218	-2.00805	1.24431	-4.27004	1.23141	0.690089	0.506611	0.466869	0.346888	-2.21574	0.742711	-2.68807	-1.05618	-0.624813	0.205925
+	4.88057	1.69499	P02753	P02753	Retinol-binding protein 4;Plasma retinol-binding protein(1-182);Plasma retinol-binding protein(1-181);Plasma retinol-binding protein(1-179);Plasma retinol-binding protein(1-176)	RBP4	GO:0001501;GO:0001523;GO:0001654;GO:0001894;GO:0002637;GO:0002682;GO:0002697;GO:0002700;GO:0002791;GO:0002793;GO:0003006;GO:0003008;GO:0005975;GO:0005996;GO:0006006;GO:0006066;GO:0006081;GO:0006094;GO:0006629;GO:0006720;GO:0006721;GO:0006766;GO:0006775;GO:0006776;GO:0006810;GO:0006869;GO:0007165;GO:0007276;GO:0007283;GO:0007423;GO:0007507;GO:0007584;GO:0007602;GO:0007603;GO:0008152;GO:0008285;GO:…	GO:0005215;GO:0005488;GO:0005501;GO:0008289;GO:0016918;GO:0019840;GO:0019841;GO:0019842;GO:0022857;GO:0034632;GO:0051183	GO:0005576;GO:0005615;GO:0005829;GO:0031982;GO:0031988;GO:0032991;GO:0043226;GO:0043227;GO:0043230;GO:0043234;GO:0044421;GO:0044424;GO:0044444;GO:0044464;GO:0065010;GO:0070062	REACT_160130;REACT_160156;REACT_24968	11	11	10	80.1	80.1	80.1	23.01	203.3	195610000	185	0.044631	1.34399	-4.04437	-3.51018	2.67433	0.119247	1.09673	-1.65794	2.359	-0.698308	3.09229	-4.14802	-0.261862	-4.28517	2.7796	-2.30595	-1.09543	-2.41508	2.51571	4.00301	-0.350729	-1.86216	2.22332	-0.817557	1.42842	-2.28929	2.30742	-0.776751	3.23515
+	12.4848	1.68284	Q16363	Q16363	Laminin subunit alpha-4	LAMA4	GO:0007155;GO:0009987;GO:0016043;GO:0022610;GO:0030155;GO:0030198;GO:0030334;GO:0032879;GO:0040012;GO:0043062;GO:0045995;GO:0050789;GO:0050793;GO:0050794;GO:0051239;GO:0051270;GO:0065007;GO:0071840;GO:0071841;GO:0071842;GO:2000026;GO:2000145	GO:0005198;GO:0005201	GO:0005576;GO:0005604;GO:0005605;GO:0005606;GO:0031982;GO:0031988;GO:0032991;GO:0043226;GO:0043227;GO:0043230;GO:0043234;GO:0043256;GO:0044420;GO:0044421;GO:0065010;GO:0070062	REACT_163874;REACT_163906;REACT_169262	44	44	40	30	30	25.5	202.52	323.31	393830000	1461	0.418029	1.78132	0.638586	-2.41801	0.0998592	-0.9091	-0.21155	-1.50139	0.949541	-0.451594	0.789165	0.349472	-0.064724	-0.23715	1.89788	0.974262	1.32234	-0.363539	2.25692	-2.30225	0.642281	-0.671913	0.890884	-0.386319	1.86639	-3.73759	-0.384725	-1.69462	1.28301
+	9.43931	1.68221	Q13425	Q13425	Beta-2-syntrophin	SNTB2			GO:0005737;GO:0005874;GO:0005912;GO:0005924;GO:0005925;GO:0012506;GO:0016010;GO:0016020;GO:0030054;GO:0030055;GO:0030658;GO:0030659;GO:0031090;GO:0031982;GO:0031988;GO:0032991;GO:0043226;GO:0043227;GO:0043230;GO:0043234;GO:0044421;GO:0044422;GO:0044424;GO:0044425;GO:0044430;GO:0044433;GO:0044444;GO:0044446;GO:0044459;GO:0044464;GO:0045202;GO:0065010;GO:0070062;GO:0070161		11	10	10	24.1	22.2	22.2	57.949	28.327	49863000	128	-0.67212	-4.00176	0.854719	-2.95503	-0.102743	-1.50438	-1.49503	-4.4191	-0.0579967	-3.51099	1.28535	-1.48842	-1.43554	-5.07145	1.41892	-4.93976	-2.65157	-0.886086	1.31599	-1.95617	-1.07035	-4.45883	-0.597511	0.0942545	0.762721	-3.30005	-0.327807	-4.63288	0.325695
+	2.22141	1.68141	P23458	P23458	Tyrosine-protein kinase JAK1	JAK1	GO:0001959;GO:0002376;GO:0002682;GO:0006464;GO:0006468;GO:0006793;GO:0006796;GO:0006928;GO:0006950;GO:0006952;GO:0006955;GO:0007165;GO:0007166;GO:0007167;GO:0007169;GO:0008152;GO:0009966;GO:0009987;GO:0010033;GO:0016310;GO:0016477;GO:0019221;GO:0019538;GO:0023051;GO:0030154;GO:0031347;GO:0032502;GO:0034097;GO:0034340;GO:0034341;GO:0035556;GO:0040011;GO:0042127;GO:0042221;GO:0043170;GO:0043412;GO:…	GO:0000166;GO:0003824;GO:0004672;GO:0004713;GO:0004715;GO:0005102;GO:0005126;GO:0005131;GO:0005488;GO:0005515;GO:0005524;GO:0016301;GO:0016740;GO:0016772;GO:0016773;GO:0017076;GO:0019899;GO:0019902;GO:0019903;GO:0030554;GO:0032553;GO:0032555;GO:0032559;GO:0035639;GO:0051427	GO:0005634;GO:0005737;GO:0005829;GO:0005856;GO:0005912;GO:0005924;GO:0005925;GO:0012505;GO:0019897;GO:0019898;GO:0030054;GO:0030055;GO:0031234;GO:0043226;GO:0043227;GO:0043228;GO:0043229;GO:0043231;GO:0043232;GO:0044424;GO:0044425;GO:0044444;GO:0044459;GO:0044464;GO:0070161	REACT_115529;REACT_115831;REACT_1183;REACT_1391;REACT_1695;REACT_19290;REACT_23891;REACT_24980;REACT_25078;REACT_25162;REACT_25216;REACT_27283;REACT_27307	8	8	8	11	11	11	133.28	26.21	538890000	87	3.40398	-3.56382	4.16259	2.70386	4.44445	4.1343	4.2372	-4.41406	4.66585	2.73563	4.67179	-4.64664	3.79519	1.54782	4.74464	3.91989	4.32808	2.89365	4.5972	-3.64394	6.2432	-4.93863	4.85563	4.24843	4.02396	2.53252	4.42393	-6.32112	4.43837
+	13.4884	1.67665	P23141;Q9UKY3	P23141	Liver carboxylesterase 1	CES1	GO:0008152;GO:0009636;GO:0009987;GO:0030154;GO:0030855;GO:0032502;GO:0042221;GO:0048869;GO:0050896	GO:0003824;GO:0016787;GO:0016788;GO:0019213;GO:0047374;GO:0052689	GO:0005615;GO:0005788;GO:0031974;GO:0043233;GO:0044421;GO:0044422;GO:0044424;GO:0044432;GO:0044444;GO:0044446;GO:0044464;GO:0070013		46	46	44	78.5	78.5	78.5	62.52	323.31	2293600000	2364	3.32085	1.17234	3.55442	2.52679	2.90884	1.23357	3.90877	5.24094	2.94956	-0.985656	3.63308	0.659513	1.36955	-1.27376	4.00921	2.6763	4.03106	0.993061	3.88117	1.07461	3.20746	2.20006	3.91062	3.52502	4.24043	4.18833	4.15343	0.864519	3.22151
+	16.0894	1.67623	P35580	P35580	Myosin-10	MYH10	GO:0000281;GO:0000910;GO:0001701;GO:0001764;GO:0001778;GO:0003008;GO:0006810;GO:0006887;GO:0006928;GO:0006930;GO:0006935;GO:0006996;GO:0007009;GO:0007010;GO:0007097;GO:0007155;GO:0007165;GO:0007166;GO:0007167;GO:0007169;GO:0007264;GO:0007411;GO:0007507;GO:0007512;GO:0008152;GO:0008283;GO:0008360;GO:0009605;GO:0009790;GO:0009792;GO:0009987;GO:0010927;GO:0016043;GO:0016044;GO:0016192;GO:0016477;GO:…	GO:0000146;GO:0000166;GO:0003774;GO:0003779;GO:0003824;GO:0005488;GO:0005515;GO:0005524;GO:0008092;GO:0016462;GO:0016787;GO:0016817;GO:0016818;GO:0016887;GO:0017076;GO:0017111;GO:0030554;GO:0030898;GO:0032553;GO:0032555;GO:0032559;GO:0035639;GO:0042623;GO:0043531;GO:0051015	GO:0001725;GO:0005634;GO:0005737;GO:0005739;GO:0005819;GO:0005829;GO:0005856;GO:0005886;GO:0005938;GO:0015629;GO:0016020;GO:0016459;GO:0016460;GO:0030027;GO:0030424;GO:0030426;GO:0030427;GO:0030496;GO:0031594;GO:0031982;GO:0031988;GO:0032154;GO:0032155;GO:0032432;GO:0032991;GO:0042641;GO:0042995;GO:0043005;GO:0043025;GO:0043197;GO:0043226;GO:0043227;GO:0043228;GO:0043229;GO:0043230;GO:0043231;GO:…	REACT_19277;REACT_264548;REACT_355192;REACT_355303;REACT_355347;REACT_355542	178	152	150	70.4	60.6	59.9	229	323.31	5791000000	10192	3.09933	0.591166	3.04667	0.920706	2.72332	1.61943	3.50995	-0.0101004	3.66765	0.890704	3.52945	2.59474	1.09617	1.95833	3.92957	2.21782	3.66307	0.19964	3.75909	1.48413	3.51211	0.895315	4.50205	3.05889	3.84005	-0.787657	3.22676	1.58162	3.87583
+	23.0094	1.67006	Q96AC1	Q96AC1	Fermitin family homolog 2	FERMT2	GO:0000902;GO:0000904;GO:0006461;GO:0007044;GO:0007155;GO:0007160;GO:0007165;GO:0007166;GO:0007167;GO:0007178;GO:0007179;GO:0007229;GO:0008104;GO:0008360;GO:0009653;GO:0009987;GO:0016043;GO:0016044;GO:0016055;GO:0022603;GO:0022604;GO:0022607;GO:0022610;GO:0031589;GO:0032502;GO:0032989;GO:0033036;GO:0033622;GO:0034329;GO:0034330;GO:0034446;GO:0034613;GO:0043933;GO:0048041;GO:0048869;GO:0050789;GO:…	GO:0005488;GO:0005543;GO:0005547;GO:0008289;GO:0035091	GO:0001725;GO:0005634;GO:0005654;GO:0005737;GO:0005829;GO:0005912;GO:0005924;GO:0005925;GO:0005938;GO:0009986;GO:0019897;GO:0019898;GO:0030054;GO:0030055;GO:0031234;GO:0031253;GO:0031256;GO:0031258;GO:0031674;GO:0031941;GO:0032432;GO:0032991;GO:0042641;GO:0043226;GO:0043227;GO:0043229;GO:0043231;GO:0043234;GO:0044422;GO:0044424;GO:0044425;GO:0044428;GO:0044430;GO:0044444;GO:0044446;GO:0044449;GO:…	REACT_20649	30	30	27	55.9	55.9	51.9	77.86	323.31	645210000	1464	2.07189	-0.40062	2.11586	-0.975067	1.68405	0.728394	1.94308	-1.01568	2.31116	-0.387214	2.56005	0.884192	0.195429	0.38405	3.03758	1.53404	2.44202	-0.155989	2.82089	0.930526	1.62461	-0.296585	2.57904	1.21141	2.47806	-2.49049	1.92867	0.439957	2.4891
+	4.23761	1.66631	P15088	P15088	Mast cell carboxypeptidase A	CPA3	GO:0002003;GO:0002230;GO:0002682;GO:0002697;GO:0002831;GO:0006508;GO:0008152;GO:0009987;GO:0010817;GO:0016485;GO:0016486;GO:0019538;GO:0031347;GO:0042445;GO:0043170;GO:0043900;GO:0044237;GO:0044238;GO:0044260;GO:0044267;GO:0048583;GO:0050688;GO:0050691;GO:0050789;GO:0051604;GO:0065007;GO:0065008;GO:0080134	GO:0003824;GO:0004180;GO:0004181;GO:0005488;GO:0008233;GO:0008235;GO:0008237;GO:0008238;GO:0008270;GO:0016787;GO:0043167;GO:0043169;GO:0046872;GO:0046914;GO:0070011	GO:0005576;GO:0016023;GO:0030133;GO:0030141;GO:0031410;GO:0031982;GO:0031988;GO:0043226;GO:0043227;GO:0043229;GO:0043231;GO:0044424;GO:0044444;GO:0044464	REACT_147707	10	10	10	24.9	24.9	24.9	48.669	72.509	99988000	145	-2.30189	-3.68882	-2.53238	-3.92362	2.11847	-3.696	-2.19313	-3.48499	-3.90914	-2.61739	-4.28456	-2.84931	-1.74525	-3.03554	-1.04278	-5.62609	-3.37009	-4.68744	-1.41428	-1.35519	-1.89229	-6.22546	1.94036	4.42176	0.494206	-4.12795	2.64808	-4.85344	-2.21575
+	10.9631	1.66524	Q9NQ79	Q9NQ79	Cartilage acidic protein 1	CRTAC1	GO:0007413;GO:0008037;GO:0008038;GO:0009987;GO:0021772;GO:0032502;GO:0048856	GO:0005488;GO:0005509;GO:0043167;GO:0043169;GO:0046872	GO:0005578;GO:0030426;GO:0030427;GO:0031012;GO:0031982;GO:0031988;GO:0043226;GO:0043227;GO:0043230;GO:0044421;GO:0044463;GO:0044464;GO:0065010;GO:0070062		8	8	8	19.4	19.4	19.4	71.42	130.78	40772000	92	-2.35816	-2.0552	-2.15383	-1.71631	-3.10785	-2.43757	-1.21967	-3.28486	-1.24055	-3.53884	-1.35332	-3.07258	-2.11183	-4.61641	0.353214	-3.33491	1.14345	-3.26155	0.77025	-1.71212	-2.15254	-2.01727	-0.948099	-1.54542	0.179557	-3.0222	-0.775167	-4.13223	0.965807
+	5.4678	1.65641	P04921	P04921	Glycophorin-C	GYPC			GO:0005856;GO:0005886;GO:0005887;GO:0016020;GO:0016021;GO:0030863;GO:0031224;GO:0031226;GO:0043226;GO:0043228;GO:0043229;GO:0043232;GO:0044424;GO:0044425;GO:0044444;GO:0044448;GO:0044459;GO:0044464		3	3	2	29.7	29.7	21.1	13.81	97.19	29222000	96	1.4299	0.81188	0.18548	1.4016	2.22597	0.288269	1.30298	-1.28585	1.31708	-0.299495	1.38009	-3.65604	-4.42704	-4.5543	1.19005	-3.39291	-4.34176	-3.76249	1.3068	-2.35933	0.171871	-0.680344	-0.633476	-0.126843	-1.81754	-3.97201	-1.77291	-3.5418	0.2414
+	15.4651	1.65596	P32119	P32119	Peroxiredoxin-2	PRDX2	GO:0000302;GO:0000303;GO:0000305;GO:0006139;GO:0006352;GO:0006367;GO:0006801;GO:0006807;GO:0006950;GO:0006979;GO:0008152;GO:0009056;GO:0009058;GO:0009987;GO:0010035;GO:0010467;GO:0010941;GO:0016070;GO:0019430;GO:0032774;GO:0033554;GO:0034599;GO:0034614;GO:0034641;GO:0042221;GO:0042542;GO:0042743;GO:0042744;GO:0042981;GO:0043066;GO:0043067;GO:0043069;GO:0043170;GO:0043523;GO:0043524;GO:0044237;GO:…	GO:0003824;GO:0004601;GO:0008379;GO:0016209;GO:0016491;GO:0016684;GO:0016705;GO:0051920	GO:0005737;GO:0005829;GO:0031982;GO:0031988;GO:0043226;GO:0043227;GO:0043230;GO:0044421;GO:0044424;GO:0044444;GO:0044464;GO:0065010;GO:0070062	REACT_264249;REACT_355377	24	23	22	89.4	89.4	86.9	21.892	323.31	1914500000	1171	3.5669	4.69271	4.63146	2.12838	6.3073	3.79765	5.57794	3.87411	5.93855	2.94142	5.31457	3.76705	2.98593	2.47943	6.38623	3.43128	4.50656	2.88443	6.49806	7.15401	4.72134	2.28571	5.05236	4.75389	4.7098	2.08368	5.7044	4.447	5.40561
+	8.58488	1.65534	P08514	P08514	Integrin alpha-IIb;Integrin alpha-IIb heavy chain;Integrin alpha-IIb light chain, form 1;Integrin alpha-IIb light chain, form 2	ITGA2B	GO:0001775;GO:0002576;GO:0002682;GO:0002684;GO:0002685;GO:0002687;GO:0006810;GO:0006887;GO:0006935;GO:0007155;GO:0007160;GO:0007165;GO:0007166;GO:0007229;GO:0007411;GO:0007596;GO:0007599;GO:0009605;GO:0009987;GO:0016043;GO:0016192;GO:0016337;GO:0022610;GO:0030168;GO:0030198;GO:0030334;GO:0030335;GO:0031589;GO:0032501;GO:0032879;GO:0032940;GO:0034109;GO:0040011;GO:0040012;GO:0040017;GO:0042221;GO:…	GO:0005488;GO:0005515;GO:0042802;GO:0043167;GO:0043169;GO:0046872;GO:0050840	GO:0005886;GO:0005887;GO:0005912;GO:0005924;GO:0005925;GO:0008305;GO:0009897;GO:0009986;GO:0012506;GO:0016020;GO:0016021;GO:0030054;GO:0030055;GO:0030659;GO:0030667;GO:0031090;GO:0031092;GO:0031224;GO:0031226;GO:0031982;GO:0031988;GO:0032991;GO:0043226;GO:0043227;GO:0043230;GO:0043234;GO:0043235;GO:0044421;GO:0044422;GO:0044424;GO:0044425;GO:0044433;GO:0044444;GO:0044446;GO:0044459;GO:0044464;GO:…	REACT_13552;REACT_15381;REACT_15443;REACT_15523;REACT_163906;REACT_22272;REACT_318	12	12	11	16.5	16.5	14.7	113.38	97.091	29936000	52	-2.85348	-4.63514	-2.5162	-3.35648	-1.2707	-1.8116	-1.60747	-3.80024	-1.27791	-0.993913	-1.23923	-2.7813	-3.29316	-4.84063	-2.07169	-4.18779	-2.91882	-3.44642	1.6133	-0.449576	-3.96967	-5.26396	-3.4083	-1.72646	-3.07745	-3.79909	-0.375615	-4.04051	-2.42855
+	11.8573	1.65382	P02679	P02679	Fibrinogen gamma chain	FGG	GO:0001775;GO:0002576;GO:0002791;GO:0002793;GO:0006461;GO:0006810;GO:0006887;GO:0007155;GO:0007160;GO:0007165;GO:0007596;GO:0007599;GO:0009966;GO:0009967;GO:0009987;GO:0010035;GO:0010038;GO:0010470;GO:0010627;GO:0010646;GO:0010647;GO:0010740;GO:0010941;GO:0016043;GO:0016192;GO:0016337;GO:0017157;GO:0019229;GO:0022407;GO:0022409;GO:0022603;GO:0022607;GO:0022610;GO:0023051;GO:0023056;GO:0030155;GO:…	GO:0005102;GO:0005198;GO:0005488;GO:0005515;GO:0043167;GO:0043169;GO:0046872;GO:0050839	GO:0005576;GO:0005577;GO:0005615;GO:0005886;GO:0005938;GO:0009897;GO:0009986;GO:0016020;GO:0016023;GO:0030141;GO:0031091;GO:0031093;GO:0031410;GO:0031974;GO:0031982;GO:0031983;GO:0031988;GO:0032991;GO:0034774;GO:0043226;GO:0043227;GO:0043229;GO:0043230;GO:0043231;GO:0043233;GO:0043234;GO:0044421;GO:0044422;GO:0044424;GO:0044425;GO:0044433;GO:0044444;GO:0044446;GO:0044459;GO:0044464;GO:0060205;GO:…	REACT_13552;REACT_1439;REACT_15381;REACT_15443;REACT_15523;REACT_318	32	32	31	60.5	60.5	60.5	51.511	323.31	5217300000	2665	2.91123	5.6712	4.13871	0.67308	5.08175	2.39671	5.12973	2.96415	4.3074	2.63123	4.94502	2.96518	4.75245	3.31563	5.89397	4.11203	4.4819	2.73324	6.80746	6.83195	3.74175	1.14295	4.3697	3.78927	4.02891	0.825863	5.833	3.01612	5.50488
+	15.379	1.65377	Q9BZF9	Q9BZF9	Uveal autoantigen with coiled-coil domains and ankyrin repeats	UACA	GO:0006917;GO:0006950;GO:0006974;GO:0007165;GO:0008629;GO:0008630;GO:0008631;GO:0009314;GO:0009411;GO:0009416;GO:0009628;GO:0009987;GO:0010941;GO:0010942;GO:0010952;GO:0012502;GO:0019222;GO:0031347;GO:0031348;GO:0032101;GO:0032102;GO:0032386;GO:0032387;GO:0032388;GO:0032879;GO:0032880;GO:0033157;GO:0033554;GO:0034762;GO:0034763;GO:0034764;GO:0035556;GO:0042306;GO:0042307;GO:0042308;GO:0042345;GO:…		GO:0005576;GO:0005634;GO:0005635;GO:0005654;GO:0005737;GO:0005739;GO:0005856;GO:0016020;GO:0031967;GO:0031975;GO:0031982;GO:0031988;GO:0032991;GO:0043226;GO:0043227;GO:0043228;GO:0043229;GO:0043230;GO:0043231;GO:0043232;GO:0043234;GO:0043293;GO:0044421;GO:0044422;GO:0044424;GO:0044428;GO:0044444;GO:0044445;GO:0044446;GO:0044464;GO:0048471;GO:0065010;GO:0070062		41	41	40	33.6	33.6	33.1	162.5	220.9	200580000	477	2.8982	-0.277321	2.24417	1.63862	0.768068	0.591188	1.40665	1.16941	1.9103	0.78688	2.65234	0.316414	-0.887465	-1.82633	2.21428	-0.563627	2.11958	-0.449884	1.01389	-0.42065	3.64888	0.559361	2.68147	0.218673	1.75112	0.577093	0.56857	-0.726784	1.90138
+	4.986	1.65097	Q7L266	Q7L266	Isoaspartyl peptidase/L-asparaginase;Isoaspartyl peptidase/L-asparaginase alpha chain;Isoaspartyl peptidase/L-asparaginase beta chain	ASRGL1	GO:0006082;GO:0006520;GO:0006528;GO:0006530;GO:0006807;GO:0008152;GO:0009056;GO:0009063;GO:0009064;GO:0009065;GO:0009066;GO:0009068;GO:0009308;GO:0009310;GO:0009987;GO:0016054;GO:0019752;GO:0033345;GO:0034641;GO:0042180;GO:0043436;GO:0044106;GO:0044237;GO:0044238;GO:0044248;GO:0044281;GO:0044282;GO:0046395	GO:0003824;GO:0004067;GO:0008233;GO:0008238;GO:0008242;GO:0008798;GO:0016787;GO:0016810;GO:0016811;GO:0070011	GO:0005634;GO:0005737;GO:0043226;GO:0043227;GO:0043229;GO:0043231;GO:0044424;GO:0044464		6	6	6	26.6	26.6	26.6	32.054	11.303	44487000	31	-0.597562	0.332697	0.771832	-0.000289917	-0.133223	-0.0708141	2.21234	-3.6291	0.323732	-0.46452	-0.108332	-1.20955	-4.22555	-4.51719	-2.76576	-4.2617	-0.420345	-3.65208	0.0501862	-2.93881	-4.3195	0.565302	-3.53339	-3.39491	1.09805	-0.83095	0.256877	-4.52384	-0.135607
+	8.81133	1.64891	P08185	P08185	Corticosteroid-binding globulin	SERPINA6	GO:0006629;GO:0006810;GO:0008152;GO:0008202;GO:0008207;GO:0008211;GO:0009987;GO:0010466;GO:0010817;GO:0010951;GO:0019222;GO:0034754;GO:0042445;GO:0043086;GO:0044092;GO:0044237;GO:0044238;GO:0050789;GO:0050790;GO:0051234;GO:0051336;GO:0051346;GO:0052547;GO:0052548;GO:0065007;GO:0065008;GO:0065009	GO:0004857;GO:0004866;GO:0004867;GO:0005488;GO:0005496;GO:0008289;GO:0030234;GO:0030414;GO:0061134;GO:0061135	GO:0005615;GO:0031982;GO:0031988;GO:0043226;GO:0043227;GO:0043230;GO:0044421;GO:0065010;GO:0070062		12	12	12	50.6	50.6	50.6	45.14	227.01	245430000	404	2.03461	2.94429	1.58991	2.13321	3.20153	1.89162	3.60483	0.905467	3.07355	1.37785	2.59341	1.39332	-0.850866	-1.34515	2.03245	-1.34886	0.812704	-1.67574	2.33545	4.18429	3.77568	1.27043	1.97527	0.963967	1.51435	-3.79409	2.50591	-1.05471	2.99829
+	28.9889	1.64774	P46939	P46939	Utrophin	UTRN	GO:0001952;GO:0001954;GO:0002028;GO:0003008;GO:0003012;GO:0006936;GO:0007517;GO:0007568;GO:0009653;GO:0009987;GO:0010810;GO:0010811;GO:0010959;GO:0010975;GO:0010976;GO:0016043;GO:0022898;GO:0030030;GO:0030154;GO:0030155;GO:0031344;GO:0031346;GO:0032409;GO:0032412;GO:0032501;GO:0032502;GO:0032879;GO:0032989;GO:0032990;GO:0034762;GO:0034765;GO:0042692;GO:0043269;GO:0045595;GO:0045664;GO:0045785;GO:…	GO:0003779;GO:0005102;GO:0005178;GO:0005488;GO:0005515;GO:0008092;GO:0008270;GO:0017166;GO:0019899;GO:0019900;GO:0019901;GO:0032403;GO:0043167;GO:0043169;GO:0046872;GO:0046914	GO:0005654;GO:0005737;GO:0005856;GO:0005886;GO:0016010;GO:0016020;GO:0030016;GO:0030054;GO:0030175;GO:0031253;GO:0031527;GO:0031594;GO:0031982;GO:0031988;GO:0032991;GO:0042383;GO:0042995;GO:0043226;GO:0043227;GO:0043228;GO:0043229;GO:0043230;GO:0043232;GO:0043234;GO:0043292;GO:0044421;GO:0044422;GO:0044424;GO:0044425;GO:0044428;GO:0044444;GO:0044446;GO:0044456;GO:0044459;GO:0044463;GO:0044464;GO:…		147	147	143	49.9	49.9	49.1	394.46	323.31	1273000000	4003	3.1202	0.108797	2.7497	1.24978	2.37296	1.70881	2.47491	0.700339	3.00309	1.42438	3.13527	1.49262	1.6518	0.669729	3.05796	1.41414	2.62432	0.240015	2.63103	-0.0205488	3.39466	1.1468	2.69909	2.10347	2.73138	-1.13329	2.56231	-0.153893	2.91969
+	5.10478	1.64375	P02008	P02008	Hemoglobin subunit zeta	HBZ	GO:0000122;GO:0006355;GO:0006357;GO:0009889;GO:0009890;GO:0009892;GO:0009987;GO:0010468;GO:0010556;GO:0010558;GO:0010605;GO:0010629;GO:0019219;GO:0019222;GO:0021700;GO:0031323;GO:0031324;GO:0031326;GO:0031327;GO:0032502;GO:0043249;GO:0045892;GO:0045934;GO:0048469;GO:0048519;GO:0048523;GO:0048869;GO:0050789;GO:0050794;GO:0051171;GO:0051172;GO:0051252;GO:0051253;GO:0060255;GO:0065007;GO:0080090;GO:…	GO:0005215;GO:0005344;GO:0005488;GO:0005506;GO:0019825;GO:0020037;GO:0022892;GO:0043167;GO:0043169;GO:0046872;GO:0046906;GO:0046914	GO:0005833;GO:0031982;GO:0031988;GO:0032991;GO:0043226;GO:0043227;GO:0043230;GO:0043234;GO:0044421;GO:0044424;GO:0044444;GO:0044445;GO:0044464;GO:0065010;GO:0070062		9	8	8	73.2	68.3	68.3	15.637	47.778	57408000	123	-1.22127	2.30941	0.563467	0.815048	-1.87702	-3.2215	-0.499311	0.35856	-1.21895	-3.79311	0.357122	-4.41461	-3.22869	-3.69972	-2.21605	-4.40615	-3.46868	-5.75492	-2.42998	-1.19798	-0.65493	-2.03848	-1.52291	-2.22592	-2.59567	-4.84668	0.357297	-2.20074	0.0843792
+	3.84733	1.63976	Q14520	Q14520	Hyaluronan-binding protein 2;Hyaluronan-binding protein 2 50 kDa heavy chain;Hyaluronan-binding protein 2 50 kDa heavy chain alternate form;Hyaluronan-binding protein 2 27 kDa light chain;Hyaluronan-binding protein 2 27 kDa light chain alternate form	HABP2	GO:0007155;GO:0009987;GO:0022610	GO:0001871;GO:0003824;GO:0004175;GO:0004252;GO:0005488;GO:0005539;GO:0008233;GO:0008236;GO:0016787;GO:0017171;GO:0030246;GO:0030247;GO:0070011	GO:0005576;GO:0005615;GO:0044421		7	7	4	13.8	13.8	6.8	62.671	16.47	85384000	78	0.3886	3.14937	0.626453	-3.5894	2.52125	-4.90264	0.450378	0.32248	1.97364	-1.55333	1.61272	-4.82247	-4.83633	-1.24623	-0.363718	-3.21746	-3.42867	-3.64441	2.0594	4.42074	-5.17323	-4.08692	-1.06166	-3.62366	0.911769	-4.69266	-0.51337	0.567034	2.58398
+	9.46649	1.63943	Q0ZGT2	Q0ZGT2	Nexilin	NEXN	GO:0006464;GO:0006468;GO:0006793;GO:0006796;GO:0008152;GO:0009987;GO:0016310;GO:0019538;GO:0030334;GO:0032502;GO:0032879;GO:0033043;GO:0040012;GO:0043170;GO:0043412;GO:0044237;GO:0044238;GO:0044260;GO:0044267;GO:0048468;GO:0048739;GO:0048747;GO:0048856;GO:0048869;GO:0050789;GO:0050794;GO:0051128;GO:0051270;GO:0051493;GO:0055001;GO:0055002;GO:0065007;GO:2000145	GO:0003779;GO:0003824;GO:0004672;GO:0004674;GO:0004683;GO:0005198;GO:0005488;GO:0005515;GO:0008092;GO:0008307;GO:0016301;GO:0016740;GO:0016772;GO:0016773;GO:0051015	GO:0005856;GO:0005912;GO:0005924;GO:0005925;GO:0030018;GO:0030054;GO:0030055;GO:0043226;GO:0043228;GO:0043229;GO:0043232;GO:0044422;GO:0044424;GO:0044444;GO:0044449;GO:0044464;GO:0070161		25	25	22	41.8	41.8	36.1	80.657	165.87	137260000	459	1.33644	-1.37705	0.160168	-4.29159	-0.0846424	-2.01949	1.47907	-3.5274	0.842091	-0.816176	0.735708	0.5758	-3.12714	-3.22575	0.67576	-0.827341	-0.372833	-3.67992	0.193367	-0.681893	1.27456	-2.78836	1.65034	-1.34992	0.554795	-4.79946	-0.293166	-3.18518	0.573282
+	31.376	1.63319	Q01082	Q01082	Spectrin beta chain, non-erythrocytic 1	SPTBN1	GO:0000281;GO:0000910;GO:0006464;GO:0006468;GO:0006605;GO:0006606;GO:0006793;GO:0006796;GO:0006810;GO:0006886;GO:0006892;GO:0006893;GO:0006913;GO:0006935;GO:0007009;GO:0007182;GO:0007184;GO:0007411;GO:0008064;GO:0008152;GO:0009605;GO:0009987;GO:0010639;GO:0015031;GO:0016043;GO:0016044;GO:0016192;GO:0016310;GO:0017038;GO:0019538;GO:0022402;GO:0022607;GO:0030832;GO:0030833;GO:0030834;GO:0030835;GO:…	GO:0003779;GO:0005198;GO:0005200;GO:0005488;GO:0005515;GO:0005543;GO:0008092;GO:0008289;GO:0019899;GO:0030506;GO:0051020	GO:0005730;GO:0005737;GO:0005829;GO:0005856;GO:0008091;GO:0014731;GO:0030673;GO:0031253;GO:0031256;GO:0031430;GO:0031982;GO:0031988;GO:0032437;GO:0032589;GO:0032991;GO:0033267;GO:0043226;GO:0043227;GO:0043228;GO:0043229;GO:0043230;GO:0043232;GO:0043234;GO:0044421;GO:0044422;GO:0044424;GO:0044425;GO:0044428;GO:0044430;GO:0044444;GO:0044446;GO:0044448;GO:0044449;GO:0044459;GO:0044463;GO:0044464;GO:…	REACT_18334;REACT_22266;REACT_23832	198	198	177	79.7	79.7	72.3	274.61	323.31	7816300000	12824	4.70677	2.25314	4.37636	2.78676	4.17095	2.79231	4.22519	2.83304	4.60745	1.98968	4.86431	2.75473	2.51736	2.3349	4.99429	3.02887	4.2603	2.11284	4.48232	1.7306	4.77419	2.43396	4.36573	3.26584	4.28813	1.54921	4.30719	1.83771	4.67475
+	11.6838	1.62992	Q8IXS6	Q8IXS6	Paralemmin-2	PALM2	GO:0008360;GO:0022603;GO:0022604;GO:0050789;GO:0050793;GO:0050794;GO:0051128;GO:0065007;GO:0065008		GO:0005886;GO:0016020;GO:0044464		10	10	10	28.8	28.8	28.8	42.185	122.02	51517000	232	0.843926	-1.20316	-0.327974	0.513115	-0.611647	-2.07279	-0.0892181	-1.67152	0.654478	-1.4145	0.442074	-1.09576	-2.81138	-0.804369	-0.55191	-1.94576	0.0695686	-0.60527	-0.400801	-1.79624	2.28455	-0.91918	0.785631	-0.69892	-1.05433	-4.70032	-1.16645	-2.1616	-1.2622
+	8.55271	1.62639	P03952	P03952	Plasma kallikrein;Plasma kallikrein heavy chain;Plasma kallikrein light chain	KLKB1	GO:0002542;GO:0002673;GO:0006508;GO:0007596;GO:0007597;GO:0007599;GO:0008152;GO:0009987;GO:0010468;GO:0010954;GO:0016043;GO:0016485;GO:0019222;GO:0019538;GO:0022411;GO:0022617;GO:0030193;GO:0030195;GO:0030198;GO:0031347;GO:0031638;GO:0031639;GO:0032101;GO:0032501;GO:0042730;GO:0043062;GO:0043170;GO:0044238;GO:0048518;GO:0048519;GO:0048583;GO:0050727;GO:0050789;GO:0050817;GO:0050818;GO:0050819;GO:…	GO:0003824;GO:0004175;GO:0004252;GO:0008233;GO:0008236;GO:0016787;GO:0017171;GO:0070011	GO:0005576;GO:0005615;GO:0005886;GO:0016020;GO:0031982;GO:0031988;GO:0043226;GO:0043227;GO:0043230;GO:0044421;GO:0044464;GO:0065010;GO:0070062	REACT_118682;REACT_326	20	20	18	35.9	35.9	30.9	71.369	64.098	135490000	269	-1.92537	0.971487	-1.09979	-2.90831	2.09659	-0.11017	1.63191	-1.03722	0.218819	-2.75033	0.461599	-1.33562	-1.79805	-2.15236	0.581478	-1.77253	-0.492643	-2.56289	1.32624	3.46719	1.49129	-1.74324	0.534838	-1.75674	-0.0251207	-4.36361	1.15446	-1.63857	2.11624
+	8.94566	1.62339	Q9Y613	Q9Y613	FH1/FH2 domain-containing protein 1	FHOD1	GO:0006355;GO:0006357;GO:0009889;GO:0009891;GO:0009893;GO:0010468;GO:0010556;GO:0010557;GO:0010604;GO:0010628;GO:0010638;GO:0019219;GO:0019222;GO:0031323;GO:0031325;GO:0031326;GO:0031328;GO:0032231;GO:0032233;GO:0032956;GO:0032970;GO:0033043;GO:0044087;GO:0045893;GO:0045935;GO:0045944;GO:0048518;GO:0048522;GO:0050789;GO:0050794;GO:0051128;GO:0051130;GO:0051171;GO:0051173;GO:0051252;GO:0051254;GO:…	GO:0005488;GO:0005515;GO:0042802	GO:0005634;GO:0005737;GO:0005856;GO:0016020;GO:0032059;GO:0042995;GO:0043226;GO:0043227;GO:0043228;GO:0043229;GO:0043231;GO:0043232;GO:0044424;GO:0044464		23	23	23	29.3	29.3	29.3	126.55	172.42	233500000	308	1.32363	1.4167	3.07537	1.75955	1.80492	0.99209	0.996105	-0.0453424	1.52039	1.50282	2.10387	0.579826	1.88667	-1.52766	2.66839	1.67521	1.77818	-0.938286	2.36949	2.33386	-1.56003	0.784431	3.37765	2.54473	3.43909	-1.56645	1.86927	-0.71254	2.86745
+	6.2511	1.61671	Q13214	Q13214	Semaphorin-3B	SEMA3B	GO:0006935;GO:0007154;GO:0007267;GO:0007411;GO:0009605;GO:0009987;GO:0023052;GO:0040011;GO:0042221;GO:0042330;GO:0050896	GO:0004872	GO:0005783;GO:0016020;GO:0031982;GO:0031988;GO:0043226;GO:0043227;GO:0043229;GO:0043230;GO:0043231;GO:0044421;GO:0044424;GO:0044444;GO:0044464;GO:0065010;GO:0070062		8	8	8	12.4	12.4	12.4	83.121	42.342	43860000	47	-2.85856	-4.30602	-5.6472	-5.45499	-3.56286	-4.176	-3.77272	-4.56751	-4.22508	-4.70442	-3.24663	-4.26237	-4.21046	-4.35119	-0.457651	-1.37494	-0.997515	-3.58678	1.38411	-4.19081	-3.792	-4.03004	-0.102911	-3.73686	1.49118	-4.37923	-3.62143	-4.44864	-4.53685
+	7.3988	1.61664	Q00013	Q00013	55 kDa erythrocyte membrane protein	MPP1	GO:0002682;GO:0002685;GO:0002688;GO:0006139;GO:0006753;GO:0006793;GO:0006796;GO:0006807;GO:0007165;GO:0008152;GO:0009117;GO:0009987;GO:0016310;GO:0030334;GO:0032101;GO:0032879;GO:0034641;GO:0040012;GO:0044237;GO:0044238;GO:0044281;GO:0046939;GO:0048583;GO:0050789;GO:0050794;GO:0050795;GO:0050896;GO:0050920;GO:0051270;GO:0051716;GO:0055086;GO:0065007;GO:0090022;GO:2000145	GO:0003824;GO:0004385;GO:0016301;GO:0016740;GO:0016772;GO:0016776;GO:0019201;GO:0019205	GO:0005622;GO:0005856;GO:0005887;GO:0005902;GO:0016020;GO:0016021;GO:0030863;GO:0031224;GO:0031226;GO:0032420;GO:0042995;GO:0043226;GO:0043228;GO:0043229;GO:0043232;GO:0044422;GO:0044424;GO:0044425;GO:0044444;GO:0044448;GO:0044459;GO:0044464		20	20	20	63.1	63.1	63.1	52.296	251.41	103770000	207	-0.430165	0.661047	-1.07215	-2.23953	2.27044	0.855694	-0.251999	-0.795087	1.3278	-2.80905	-0.534452	-1.10776	0.88171	-2.37138	1.95897	0.263481	-0.579491	-2.45112	2.54172	3.15718	0.607628	-2.0088	-0.994741	-0.861609	-0.680255	-6.32017	1.60958	1.9999	0.742422
+	14.2558	1.61565	P48681	P48681	Nestin	NES	GO:0000086;GO:0001654;GO:0007417;GO:0007420;GO:0007423;GO:0008283;GO:0008284;GO:0009653;GO:0009987;GO:0010638;GO:0010941;GO:0016043;GO:0019222;GO:0022402;GO:0030030;GO:0030842;GO:0030844;GO:0031076;GO:0032091;GO:0032502;GO:0032989;GO:0032990;GO:0033043;GO:0042127;GO:0042981;GO:0043010;GO:0043066;GO:0043067;GO:0043069;GO:0043086;GO:0043243;GO:0043244;GO:0043393;GO:0043523;GO:0043524;GO:0044092;GO:…	GO:0005198;GO:0005488;GO:0005515;GO:0019215;GO:0032403	GO:0005737;GO:0005856;GO:0005882;GO:0032991;GO:0043226;GO:0043228;GO:0043229;GO:0043232;GO:0043234;GO:0044422;GO:0044424;GO:0044430;GO:0044446;GO:0044464;GO:0045111		56	56	54	42.4	42.4	41.3	177.44	323.31	513060000	1599	2.29924	-2.52887	1.49422	2.26104	0.782915	0.199713	0.981293	-1.44626	1.84748	0.0502939	2.51234	0.524675	-1.23111	-0.182364	1.70266	0.206684	1.23754	-0.618263	1.08633	-1.73392	2.02572	2.31412	0.92593	-0.586888	1.07509	-3.28211	0.586972	-3.83402	1.15084
+	10.1016	1.61483	P69905	P69905	Hemoglobin subunit alpha	HBA1	GO:0000302;GO:0006461;GO:0006810;GO:0006811;GO:0006820;GO:0006897;GO:0006898;GO:0006950;GO:0006979;GO:0008152;GO:0009056;GO:0009987;GO:0010035;GO:0010324;GO:0010941;GO:0010942;GO:0015669;GO:0015671;GO:0015698;GO:0015701;GO:0015711;GO:0016043;GO:0016044;GO:0016192;GO:0022607;GO:0033554;GO:0034599;GO:0034614;GO:0042221;GO:0042542;GO:0042743;GO:0042744;GO:0043933;GO:0044237;GO:0044248;GO:0044281;GO:…	GO:0005215;GO:0005344;GO:0005488;GO:0005506;GO:0019825;GO:0020037;GO:0022892;GO:0043167;GO:0043169;GO:0046872;GO:0046906;GO:0046914	GO:0005576;GO:0005829;GO:0005833;GO:0015935;GO:0016020;GO:0022627;GO:0030529;GO:0031838;GO:0031974;GO:0031982;GO:0031983;GO:0031988;GO:0032991;GO:0043226;GO:0043227;GO:0043230;GO:0043233;GO:0043234;GO:0044421;GO:0044422;GO:0044424;GO:0044433;GO:0044444;GO:0044445;GO:0044446;GO:0044464;GO:0060205;GO:0065010;GO:0070062;GO:0071682;GO:0072562	REACT_121329;REACT_121380;REACT_160163	28	28	23	100	100	100	15.257	323.31	112550000000	12024	9.10734	9.9403	9.04637	9.80283	10.6413	9.26074	10.5858	8.73439	10.7406	8.69594	9.83683	8.44421	6.94981	5.65683	9.91898	6.84577	7.5149	6.37271	10.2179	11.3618	10.2928	9.38018	8.70201	9.23808	8.97028	4.93822	9.52669	7.50459	9.16161
+	12.0309	1.61455	P12277	P12277	Creatine kinase B-type	CKB	GO:0006082;GO:0006520;GO:0006575;GO:0006599;GO:0006600;GO:0006807;GO:0006873;GO:0008152;GO:0009308;GO:0009987;GO:0019725;GO:0019752;GO:0021762;GO:0030002;GO:0030320;GO:0030644;GO:0032502;GO:0034641;GO:0042180;GO:0042592;GO:0043436;GO:0044106;GO:0044237;GO:0044238;GO:0044281;GO:0048856;GO:0048878;GO:0050801;GO:0055064;GO:0055081;GO:0055082;GO:0055083;GO:0065007;GO:0065008	GO:0000166;GO:0003824;GO:0004111;GO:0005488;GO:0005515;GO:0005524;GO:0016301;GO:0016740;GO:0016772;GO:0016775;GO:0017076;GO:0019899;GO:0030554;GO:0031625;GO:0032553;GO:0032555;GO:0032559;GO:0035639	GO:0005739;GO:0005829;GO:0031982;GO:0031988;GO:0043226;GO:0043227;GO:0043229;GO:0043230;GO:0043231;GO:0044421;GO:0044424;GO:0044444;GO:0044464;GO:0065010;GO:0070062	REACT_813	20	20	20	68	68	68	42.644	323.31	1202400000	1496	4.00342	0.520033	3.28719	2.15707	3.24805	2.8452	3.69739	1.32762	3.62836	3.49778	3.66573	0.43169	0.961979	2.63444	3.28499	1.86113	1.60929	-1.77386	2.17496	1.35614	2.23935	1.20499	2.90861	2.11501	3.55612	-1.69201	2.56276	1.99368	2.89937
+	7.42715	1.60366	P07225;CON__P07224	P07225	Vitamin K-dependent protein S	PROS1	GO:0001775;GO:0002376;GO:0002576;GO:0002673;GO:0002682;GO:0002697;GO:0002920;GO:0006464;GO:0006508;GO:0006810;GO:0006887;GO:0006928;GO:0006950;GO:0006952;GO:0006955;GO:0007596;GO:0007599;GO:0008152;GO:0009987;GO:0010466;GO:0010468;GO:0010951;GO:0016192;GO:0016477;GO:0017187;GO:0018193;GO:0018200;GO:0018214;GO:0019222;GO:0019538;GO:0030168;GO:0030193;GO:0030195;GO:0030449;GO:0031347;GO:0032101;GO:…	GO:0004857;GO:0004866;GO:0005488;GO:0005509;GO:0030234;GO:0030414;GO:0043167;GO:0043169;GO:0046872;GO:0061134;GO:0061135	GO:0000139;GO:0005576;GO:0005615;GO:0005789;GO:0005796;GO:0005886;GO:0016020;GO:0031090;GO:0031093;GO:0031974;GO:0031982;GO:0031983;GO:0031988;GO:0034774;GO:0043226;GO:0043227;GO:0043230;GO:0043233;GO:0044421;GO:0044422;GO:0044424;GO:0044425;GO:0044431;GO:0044432;GO:0044433;GO:0044444;GO:0044446;GO:0044464;GO:0060205;GO:0065010;GO:0070013;GO:0070062;GO:0072562	REACT_1050;REACT_118707;REACT_12051;REACT_1439;REACT_1906;REACT_318;REACT_733	14	14	14	27.5	27.5	27.5	75.122	118.59	98346000	282	0.0268145	2.682	0.457579	-2.34185	1.66262	-0.255989	1.80112	-0.684403	0.180483	-0.923841	0.338634	-0.955507	-0.482605	-2.52402	1.15456	-1.56314	0.393169	-3.14665	1.36296	2.86389	1.49017	-1.02681	1.07008	0.505576	-0.227033	-3.8936	1.74311	-0.77667	1.92929
+	2.41677	1.60332	P11684	P11684	Uteroglobin	SCGB1A1	GO:0000122;GO:0001817;GO:0001818;GO:0002237;GO:0002682;GO:0002683;GO:0002694;GO:0002695;GO:0006139;GO:0006355;GO:0006357;GO:0006807;GO:0007165;GO:0007565;GO:0007566;GO:0008152;GO:0008285;GO:0009410;GO:0009607;GO:0009719;GO:0009725;GO:0009889;GO:0009890;GO:0009892;GO:0009987;GO:0010033;GO:0010035;GO:0010193;GO:0010468;GO:0010556;GO:0010558;GO:0010605;GO:0010608;GO:0010629;GO:0016070;GO:0016071;GO:…	GO:0004857;GO:0004859;GO:0019834;GO:0030234;GO:0055102	GO:0005615;GO:0005635;GO:0005783;GO:0005791;GO:0016023;GO:0030141;GO:0031410;GO:0031967;GO:0031975;GO:0031982;GO:0031988;GO:0043226;GO:0043227;GO:0043229;GO:0043230;GO:0043231;GO:0044421;GO:0044422;GO:0044424;GO:0044428;GO:0044444;GO:0044446;GO:0044464;GO:0065010;GO:0070062		6	6	6	58.2	58.2	58.2	9.9937	321.57	493730000	216	3.33824	-3.93294	0.167091	3.3352	0.676409	-0.857742	1.58793	-2.01737	5.01386	-3.59964	-0.916752	-5.89207	-5.79611	-5.171	0.439846	-4.06274	-3.46197	-5.53596	-0.88768	3.03224	1.12581	1.50487	3.0015	-4.57073	3.10947	-3.18344	-2.95478	-4.02109	-0.593336
+	7.79988	1.59235	Q53TN4	Q53TN4	Cytochrome b reductase 1	CYBRD1	GO:0006810;GO:0006873;GO:0006875;GO:0006879;GO:0009987;GO:0010035;GO:0010038;GO:0010039;GO:0019725;GO:0030003;GO:0042221;GO:0042592;GO:0048878;GO:0050801;GO:0050896;GO:0051234;GO:0055065;GO:0055072;GO:0055080;GO:0055082;GO:0055085;GO:0065007;GO:0065008	GO:0000293;GO:0003824;GO:0005488;GO:0016491;GO:0016722;GO:0016723;GO:0043167;GO:0043169;GO:0046872	GO:0005886;GO:0016020;GO:0016021;GO:0031224;GO:0031253;GO:0031526;GO:0031982;GO:0031988;GO:0043226;GO:0043227;GO:0043230;GO:0044421;GO:0044425;GO:0044459;GO:0044463;GO:0044464;GO:0065010;GO:0070062	REACT_25060	5	5	5	18.5	18.5	18.5	31.641	123.34	43576000	136	-1.08446	-3.13823	-1.71222	-2.4576	-1.27829	-3.48101	0.480717	-3.77606	-2.42411	-6.39323	-1.30604	-2.86222	-2.28609	-4.47693	-0.714268	-2.11211	0.404835	-1.79625	-0.754662	-5.13152	-1.3819	-2.33053	-0.811731	-0.686723	-0.208325	-4.41234	1.31717	-2.6915	0.54825
+	9.38801	1.58751	O75923	O75923	Dysferlin	DYSF	GO:0001778;GO:0006906;GO:0006944;GO:0006996;GO:0007009;GO:0009987;GO:0016043;GO:0016044;GO:0016050;GO:0048284;GO:0061024;GO:0061025;GO:0071840;GO:0071841;GO:0071842	GO:0005488;GO:0005509;GO:0005543;GO:0005544;GO:0008289;GO:0043167;GO:0043169;GO:0046872	GO:0005768;GO:0005769;GO:0005770;GO:0005886;GO:0012506;GO:0016020;GO:0016021;GO:0016023;GO:0030027;GO:0030139;GO:0030315;GO:0030659;GO:0031090;GO:0031224;GO:0031410;GO:0031982;GO:0031988;GO:0042383;GO:0042995;GO:0043226;GO:0043227;GO:0043229;GO:0043230;GO:0043231;GO:0044421;GO:0044422;GO:0044424;GO:0044425;GO:0044433;GO:0044444;GO:0044446;GO:0044459;GO:0044464;GO:0065010;GO:0070062	REACT_17044	34	33	32	24.3	23.7	22.9	237.29	224.02	163050000	443	1.0097	1.70042	1.02342	-2.86595	-0.354639	-1.87217	-1.05096	-2.07798	-0.654068	-3.16347	0.95145	0.274456	1.0824	-2.468	1.32981	1.16025	0.916183	-2.63328	0.638861	-2.65754	0.943012	-1.28756	-0.517521	-1.6092	0.331697	-3.17729	-0.814723	1.571	0.187254
+	23.2673	1.58657	Q9H4M9	Q9H4M9	EH domain-containing protein 1	EHD1	GO:0006461;GO:0006810;GO:0006886;GO:0006897;GO:0007596;GO:0007599;GO:0009987;GO:0010324;GO:0010883;GO:0010884;GO:0010885;GO:0010886;GO:0015031;GO:0016043;GO:0016044;GO:0016192;GO:0016197;GO:0022607;GO:0030030;GO:0031175;GO:0032456;GO:0032501;GO:0032879;GO:0034381;GO:0034383;GO:0042592;GO:0042632;GO:0043933;GO:0045184;GO:0046907;GO:0048518;GO:0048878;GO:0050789;GO:0050817;GO:0050878;GO:0051234;GO:…	GO:0000166;GO:0005488;GO:0005509;GO:0005515;GO:0005524;GO:0005525;GO:0017016;GO:0017076;GO:0017137;GO:0019001;GO:0019899;GO:0030554;GO:0031267;GO:0032553;GO:0032555;GO:0032559;GO:0032561;GO:0035639;GO:0043167;GO:0043169;GO:0046872;GO:0051020	GO:0005811;GO:0005886;GO:0010008;GO:0016020;GO:0031090;GO:0031095;GO:0031901;GO:0031982;GO:0031988;GO:0043226;GO:0043227;GO:0043230;GO:0044421;GO:0044422;GO:0044424;GO:0044440;GO:0044444;GO:0044446;GO:0044464;GO:0055038;GO:0065010;GO:0070062	REACT_24970	39	39	23	78.5	78.5	51.5	60.626	323.31	2056900000	1882	5.23165	5.02106	5.03031	0.559343	4.68835	3.13182	4.95607	1.69819	4.61993	1.32932	5.05855	2.79139	3.55283	3.01769	5.69513	3.94345	4.71024	3.43812	5.34025	3.74817	3.19535	2.80508	4.63222	4.76651	5.36913	2.72666	4.80882	3.54571	5.12457
+	19.8273	1.58494	Q16555	Q16555	Dihydropyrimidinase-related protein 2	DPYSL2	GO:0001558;GO:0001975;GO:0006139;GO:0006807;GO:0006810;GO:0006897;GO:0006935;GO:0006996;GO:0007010;GO:0007165;GO:0007399;GO:0007411;GO:0008152;GO:0009605;GO:0009719;GO:0009987;GO:0010033;GO:0010243;GO:0010324;GO:0010646;GO:0010769;GO:0010975;GO:0014048;GO:0014049;GO:0014070;GO:0014073;GO:0014075;GO:0016043;GO:0016044;GO:0016192;GO:0021510;GO:0021772;GO:0022603;GO:0022604;GO:0023051;GO:0030516;GO:…	GO:0003824;GO:0004157;GO:0016787;GO:0016810;GO:0016812	GO:0005739;GO:0005829;GO:0005856;GO:0016020;GO:0030425;GO:0030426;GO:0030427;GO:0031982;GO:0031988;GO:0032991;GO:0033267;GO:0042995;GO:0043005;GO:0043025;GO:0043195;GO:0043226;GO:0043227;GO:0043228;GO:0043229;GO:0043230;GO:0043231;GO:0043232;GO:0043234;GO:0044297;GO:0044421;GO:0044424;GO:0044444;GO:0044456;GO:0044463;GO:0044464;GO:0065010;GO:0070062	REACT_19199;REACT_22365	38	38	33	76.4	76.4	65.6	62.293	323.31	3269400000	3128	4.16375	1.54025	4.08679	1.86453	4.07234	2.62416	3.93236	0.964732	4.29885	0.422622	4.35287	2.69975	3.14153	2.04185	4.69614	3.27285	4.22014	1.72244	4.64459	2.09088	3.04299	2.53406	3.82259	4.11464	4.12449	-0.680847	4.19741	2.69608	4.35559
+	1.82787	1.58207	Q7L1S5	Q7L1S5	Carbohydrate sulfotransferase 9	CHST9	GO:0000271;GO:0005975;GO:0005976;GO:0006022;GO:0006023;GO:0006024;GO:0006029;GO:0006790;GO:0006807;GO:0008152;GO:0009058;GO:0009059;GO:0009100;GO:0009101;GO:0009308;GO:0009987;GO:0010817;GO:0016051;GO:0030166;GO:0030203;GO:0030204;GO:0030206;GO:0034645;GO:0042445;GO:0042446;GO:0043170;GO:0044237;GO:0044238;GO:0044249;GO:0044260;GO:0044272;GO:0044281;GO:0065007;GO:0065008	GO:0001537;GO:0003824;GO:0008146;GO:0016740;GO:0016782	GO:0000139;GO:0005576;GO:0016020;GO:0016021;GO:0031090;GO:0031224;GO:0044422;GO:0044424;GO:0044425;GO:0044431;GO:0044444;GO:0044446;GO:0044464	REACT_120989	4	4	4	13.8	13.8	13.8	52.054	38.093	467970000	92	4.64551	3.5456	4.57343	5.29871	4.3949	4.77489	4.40513	2.77775	3.75324	4.65214	4.79424	2.02024	-0.043375	2.14373	4.51726	-3.50636	4.0818	1.27373	5.00627	4.96314	-4.2204	5.22161	-3.69914	-3.54747	4.48394	-5.39445	4.28232	2.37312	4.55694
+	9.12758	1.57946	Q06033	Q06033	Inter-alpha-trypsin inhibitor heavy chain H3	ITIH3	GO:0005975;GO:0005976;GO:0006022;GO:0006807;GO:0008152;GO:0009308;GO:0010466;GO:0010951;GO:0019222;GO:0030203;GO:0030212;GO:0043086;GO:0043170;GO:0044092;GO:0044238;GO:0050789;GO:0050790;GO:0051336;GO:0051346;GO:0052547;GO:0052548;GO:0065007;GO:0065009	GO:0004857;GO:0004866;GO:0004867;GO:0030234;GO:0030414;GO:0061134;GO:0061135	GO:0005576;GO:0031982;GO:0031988;GO:0043226;GO:0043227;GO:0043230;GO:0044421;GO:0065010;GO:0070062		23	23	19	37.5	37.5	32.6	99.848	278.83	144110000	417	-0.723596	0.327089	0.159754	-1.78929	1.12481	-1.64758	1.69819	-1.00239	-0.285849	0.439221	1.53777	-1.55392	-1.42026	-2.03889	1.01159	-1.87804	0.0114269	-2.50483	1.70054	3.2851	0.107395	-0.670546	-1.35397	0.132348	-0.0646715	-4.77277	1.44181	-2.27867	2.32043
+	15.2158	1.57525	Q15404	Q15404	Ras suppressor protein 1	RSU1	GO:0006140;GO:0007165;GO:0007264;GO:0007265;GO:0008284;GO:0009894;GO:0009987;GO:0010810;GO:0010811;GO:0016043;GO:0019219;GO:0019222;GO:0022607;GO:0030155;GO:0030811;GO:0031323;GO:0031329;GO:0033121;GO:0033124;GO:0034329;GO:0034330;GO:0035556;GO:0042127;GO:0043085;GO:0043087;GO:0043547;GO:0044093;GO:0045785;GO:0048518;GO:0048522;GO:0050789;GO:0050790;GO:0050794;GO:0050896;GO:0051171;GO:0051336;GO:…		GO:0005829;GO:0005912;GO:0005924;GO:0005925;GO:0030054;GO:0030055;GO:0031982;GO:0031988;GO:0043226;GO:0043227;GO:0043230;GO:0044421;GO:0044424;GO:0044444;GO:0044464;GO:0065010;GO:0070062;GO:0070161	REACT_20580	16	16	16	78.3	78.3	78.3	31.54	323.31	533110000	795	3.84823	0.155758	2.93463	2.98598	3.04854	1.75048	3.43083	0.46522	3.16003	2.80122	3.42336	2.09082	-0.983606	-0.454926	2.7013	0.338446	2.38252	0.492493	3.04667	2.06667	3.18749	1.43727	3.39966	1.74142	3.07059	-0.0515976	2.73996	0.972158	2.72928
+	10.5799	1.57044	Q92817	Q92817	Envoplakin	EVPL	GO:0006464;GO:0008152;GO:0008544;GO:0009888;GO:0009913;GO:0009987;GO:0018149;GO:0019538;GO:0030154;GO:0030216;GO:0030855;GO:0031424;GO:0032502;GO:0043170;GO:0043412;GO:0044237;GO:0044238;GO:0044260;GO:0044267;GO:0048856;GO:0048869	GO:0005198;GO:0005488;GO:0005515;GO:0030674;GO:0060090	GO:0001533;GO:0005737;GO:0005856;GO:0005911;GO:0030054;GO:0030057;GO:0031982;GO:0031988;GO:0043226;GO:0043227;GO:0043228;GO:0043229;GO:0043230;GO:0043232;GO:0044421;GO:0044424;GO:0044464;GO:0065010;GO:0070062;GO:0070161		98	98	89	53.5	53.5	49.7	231.6	323.31	1351900000	2519	4.95735	4.1664	3.79768	4.76208	2.91082	3.3476	3.30776	3.51717	4.00663	0.508428	4.37641	1.20114	2.55784	1.84476	4.43519	2.85997	4.11859	1.70217	3.37113	-0.443265	5.25595	4.42156	4.25809	3.63374	3.85865	1.18353	4.08012	2.45646	4.2236
+	10.4453	1.56891	Q14118	Q14118	Dystroglycan;Alpha-dystroglycan;Beta-dystroglycan	DAG1	GO:0000226;GO:0001763;GO:0002009;GO:0002011;GO:0006508;GO:0006509;GO:0006605;GO:0006606;GO:0006607;GO:0006810;GO:0006886;GO:0006913;GO:0006935;GO:0006996;GO:0007010;GO:0007016;GO:0007017;GO:0007155;GO:0007160;GO:0007272;GO:0007411;GO:0008152;GO:0008366;GO:0009605;GO:0009653;GO:0009719;GO:0009725;GO:0009966;GO:0009968;GO:0009987;GO:0010033;GO:0010627;GO:0010646;GO:0010648;GO:0010741;GO:0015031;GO:…	GO:0001618;GO:0003779;GO:0004872;GO:0005198;GO:0005488;GO:0005509;GO:0005515;GO:0008092;GO:0008307;GO:0015631;GO:0017166;GO:0019904;GO:0042169;GO:0042805;GO:0043167;GO:0043169;GO:0043236;GO:0043237;GO:0046872;GO:0050840;GO:0051393	GO:0005576;GO:0005604;GO:0005615;GO:0005654;GO:0005737;GO:0005856;GO:0005886;GO:0005911;GO:0005912;GO:0005913;GO:0005924;GO:0005925;GO:0009279;GO:0016010;GO:0016011;GO:0016020;GO:0016021;GO:0016323;GO:0019867;GO:0030027;GO:0030054;GO:0030055;GO:0030175;GO:0031224;GO:0031982;GO:0031988;GO:0032991;GO:0033267;GO:0033268;GO:0042383;GO:0042995;GO:0043034;GO:0043226;GO:0043227;GO:0043228;GO:0043229;GO:…	REACT_13552;REACT_163874;REACT_163906	15	15	14	25.1	25.1	22.8	97.44	80.111	86501000	227	2.3425	-1.16558	1.37039	2.80554	0.159044	0.675568	0.422962	-0.998202	0.556511	0.951346	1.55941	-1.14408	-2.02406	-1.96986	1.06108	-1.6618	0.377193	-2.71888	0.0876064	-2.11887	2.37815	0.833591	-0.741407	-0.978539	0.333556	-2.15073	0.043828	-1.4684	-0.042099
+	8.26715	1.56516	O00468	O00468	Agrin;Agrin N-terminal 110 kDa subunit;Agrin C-terminal 110 kDa subunit;Agrin C-terminal 90 kDa fragment;Agrin C-terminal 22 kDa fragment	AGRN	GO:0000271;GO:0000272;GO:0001523;GO:0005975;GO:0005976;GO:0006022;GO:0006023;GO:0006024;GO:0006026;GO:0006027;GO:0006140;GO:0006355;GO:0006357;GO:0006629;GO:0006720;GO:0006721;GO:0006790;GO:0006807;GO:0006935;GO:0007009;GO:0007165;GO:0007166;GO:0007186;GO:0007213;GO:0007411;GO:0007528;GO:0007602;GO:0007603;GO:0008104;GO:0008152;GO:0008582;GO:0009056;GO:0009057;GO:0009058;GO:0009059;GO:0009308;GO:…	GO:0001871;GO:0001948;GO:0002162;GO:0005198;GO:0005200;GO:0005488;GO:0005509;GO:0005515;GO:0005529;GO:0005539;GO:0030246;GO:0030247;GO:0030545;GO:0030548;GO:0033691;GO:0035374;GO:0043167;GO:0043169;GO:0043236;GO:0043394;GO:0043395;GO:0046872;GO:0048029;GO:0050840	GO:0005576;GO:0005605;GO:0005615;GO:0005737;GO:0005775;GO:0005796;GO:0005886;GO:0009986;GO:0016020;GO:0016021;GO:0030054;GO:0031012;GO:0031224;GO:0031974;GO:0031982;GO:0031988;GO:0043202;GO:0043226;GO:0043227;GO:0043230;GO:0043233;GO:0044420;GO:0044421;GO:0044422;GO:0044424;GO:0044425;GO:0044431;GO:0044437;GO:0044444;GO:0044446;GO:0044464;GO:0045202;GO:0065010;GO:0070013;GO:0070062	REACT_120752;REACT_121248;REACT_121408;REACT_13552;REACT_163874;REACT_163906;REACT_18312;REACT_24968;REACT_267741;REACT_267942;REACT_268678;REACT_268749	33	33	30	22.9	22.9	20.4	217.32	323.31	296760000	550	0.937814	-0.85815	0.736837	-0.833115	-3.37748	-1.23249	-0.721642	-2.14778	-0.317535	-2.49256	0.931164	-2.60656	0.75238	0.314911	2.24511	0.167898	1.893	0.988596	1.58188	0.0162668	-1.757	0.765215	0.870543	1.17866	2.36534	-1.07139	0.0829992	-1.10081	2.52921
+	4.66847	1.55491	P13929	P13929	Beta-enolase	ENO3	GO:0005975;GO:0005996;GO:0006006;GO:0006066;GO:0006094;GO:0007568;GO:0008152;GO:0009058;GO:0009653;GO:0009888;GO:0009987;GO:0016051;GO:0019318;GO:0019319;GO:0031099;GO:0032502;GO:0034637;GO:0040007;GO:0042221;GO:0042246;GO:0042493;GO:0043403;GO:0044237;GO:0044238;GO:0044249;GO:0044262;GO:0044281;GO:0044283;GO:0046165;GO:0046364;GO:0048589;GO:0048856;GO:0050896	GO:0000287;GO:0003824;GO:0004634;GO:0005488;GO:0016829;GO:0016835;GO:0016836;GO:0043167;GO:0043169;GO:0046872	GO:0000015;GO:0005615;GO:0005737;GO:0005829;GO:0005886;GO:0016020;GO:0031982;GO:0031988;GO:0032991;GO:0043226;GO:0043227;GO:0043230;GO:0043234;GO:0044421;GO:0044424;GO:0044444;GO:0044445;GO:0044464;GO:0065010;GO:0070062	REACT_1383;REACT_1520	17	11	11	53.9	38	38	46.986	71.728	65782000	79	0.585322	-3.39239	0.862158	1.85819	2.64522	-2.91433	3.69714	-2.12233	-2.97127	1.51484	1.02274	-3.61003	-2.66989	-3.24147	1.10338	-4.46473	-4.43775	-2.77559	-4.24675	-1.13493	-0.724977	-4.6107	-2.54233	-4.81652	-2.48942	-4.1845	-1.71665	-4.12096	2.10757
+	10.673	1.55457	P98160	P98160	Basement membrane-specific heparan sulfate proteoglycan core protein;Endorepellin;LG3 peptide	HSPG2	GO:0000271;GO:0000272;GO:0001503;GO:0001523;GO:0001525;GO:0001958;GO:0002062;GO:0005975;GO:0005976;GO:0006022;GO:0006023;GO:0006024;GO:0006026;GO:0006027;GO:0006629;GO:0006720;GO:0006721;GO:0006790;GO:0006807;GO:0007165;GO:0007420;GO:0007602;GO:0007603;GO:0008104;GO:0008152;GO:0009056;GO:0009057;GO:0009058;GO:0009059;GO:0009308;GO:0009314;GO:0009416;GO:0009581;GO:0009582;GO:0009583;GO:0009584;GO:…	GO:0005488;GO:0005515;GO:0008022;GO:0043167;GO:0043169;GO:0046872	GO:0005576;GO:0005605;GO:0005615;GO:0005775;GO:0005796;GO:0005886;GO:0005912;GO:0005924;GO:0005925;GO:0016020;GO:0030054;GO:0030055;GO:0031012;GO:0031974;GO:0031982;GO:0031988;GO:0043202;GO:0043226;GO:0043227;GO:0043230;GO:0043233;GO:0044420;GO:0044421;GO:0044422;GO:0044424;GO:0044431;GO:0044437;GO:0044444;GO:0044446;GO:0044464;GO:0065010;GO:0070013;GO:0070062;GO:0070161	REACT_118572;REACT_120752;REACT_121248;REACT_121408;REACT_13552;REACT_163874;REACT_169262;REACT_24968;REACT_267741;REACT_267942;REACT_268678;REACT_268749;REACT_6841;REACT_75925	141	141	126	50.7	50.7	44.2	468.83	323.31	4180200000	6051	2.04921	4.58312	2.67355	0.641415	2.61491	1.87505	2.266	0.795949	2.71952	1.31116	2.73596	3.13342	3.23883	2.47483	5.392	3.94384	4.54682	2.91918	5.30222	2.97523	0.968357	1.52894	4.05853	3.15665	5.11815	-0.0142021	3.39596	2.15602	5.22193
+	14.3123	1.54611	O43491	O43491	Band 4.1-like protein 2	EPB41L2	GO:0006996;GO:0007010;GO:0009987;GO:0016043;GO:0030029;GO:0030036;GO:0030865;GO:0030866;GO:0071840;GO:0071841;GO:0071842	GO:0005198	GO:0005634;GO:0005654;GO:0005886;GO:0005912;GO:0005924;GO:0005925;GO:0008091;GO:0016020;GO:0019898;GO:0030054;GO:0030055;GO:0031982;GO:0031988;GO:0043226;GO:0043227;GO:0043229;GO:0043230;GO:0043231;GO:0044421;GO:0044422;GO:0044424;GO:0044425;GO:0044428;GO:0044430;GO:0044444;GO:0044446;GO:0044448;GO:0044464;GO:0065010;GO:0070062;GO:0070161		44	44	43	54.9	54.9	53.7	112.59	323.31	526940000	1479	1.4823	-2.2132	1.50204	-1.5934	1.45358	-0.174746	1.28588	-0.191981	1.87092	-1.02932	1.99233	1.18225	0.273602	0.376863	2.27127	0.745117	1.76711	-0.530478	1.73065	-1.63556	1.88127	-0.687141	1.82408	0.986316	1.10612	-3.25669	0.860978	0.543587	1.68545
+	9.25376	1.54368	Q9NVM1	Q9NVM1	Protein eva-1 homolog B	EVA1B			GO:0016021;GO:0031224;GO:0044425;GO:0044464		5	5	5	56.4	56.4	56.4	18.373	155.89	54354000	205	1.85248	-1.14925	0.377602	1.8287	0.00823975	-1.18582	0.752825	-2.09155	0.79155	-0.190469	0.917227	-1.285	-0.347931	-2.16211	0.0861759	-2.74107	-0.219563	-3.91096	-0.228518	-4.4524	0.740284	1.02285	0.60247	-1.32946	0.47189	-3.45072	-0.144353	-3.54135	-1.23567
+	7.26294	1.54334	Q16647	Q16647	Prostacyclin synthase	PTGIS	GO:0000038;GO:0001516;GO:0001666;GO:0006082;GO:0006139;GO:0006355;GO:0006629;GO:0006631;GO:0006633;GO:0006636;GO:0006690;GO:0006692;GO:0006693;GO:0006732;GO:0006733;GO:0006753;GO:0006766;GO:0006767;GO:0006769;GO:0006805;GO:0006807;GO:0006950;GO:0008152;GO:0008610;GO:0009058;GO:0009117;GO:0009820;GO:0009889;GO:0009890;GO:0009892;GO:0009966;GO:0009967;GO:0009987;GO:0010033;GO:0010468;GO:0010556;GO:…	GO:0003824;GO:0004497;GO:0005488;GO:0005506;GO:0008116;GO:0016491;GO:0016705;GO:0016853;GO:0016860;GO:0020037;GO:0043167;GO:0043169;GO:0046872;GO:0046906;GO:0046914	GO:0005615;GO:0005634;GO:0005783;GO:0005789;GO:0005901;GO:0016020;GO:0016021;GO:0031090;GO:0031224;GO:0043226;GO:0043227;GO:0043229;GO:0043231;GO:0044421;GO:0044422;GO:0044424;GO:0044425;GO:0044432;GO:0044444;GO:0044446;GO:0044459;GO:0044464;GO:0045121	REACT_11041;REACT_11048;REACT_11053;REACT_11213;REACT_13438;REACT_13645;REACT_150149	17	17	16	44.2	44.2	41.2	57.103	177.5	123120000	360	-0.0301924	-4.46571	0.932041	-3.8043	0.000123978	-2.28465	-0.920126	-4.64531	-1.89183	-2.28824	0.524599	0.338869	0.676756	-3.67609	-1.58226	-0.650486	-0.315926	-1.81877	-1.31979	-1.33885	-0.875578	-3.82236	0.427336	-2.41856	0.404614	-4.06919	-0.852624	-3.37625	1.99588
+	12.3153	1.54069	Q9UDY2	Q9UDY2	Tight junction protein ZO-2	TJP2	GO:0003008;GO:0006139;GO:0006753;GO:0006793;GO:0006796;GO:0006807;GO:0006915;GO:0006921;GO:0007165;GO:0008152;GO:0008219;GO:0009117;GO:0009987;GO:0010033;GO:0012501;GO:0016043;GO:0016265;GO:0016310;GO:0022411;GO:0022600;GO:0032501;GO:0034641;GO:0035329;GO:0035556;GO:0042221;GO:0044237;GO:0044238;GO:0044281;GO:0046939;GO:0050789;GO:0050794;GO:0050892;GO:0050896;GO:0051716;GO:0055086;GO:0065007;GO:…	GO:0003824;GO:0004385;GO:0005488;GO:0005515;GO:0016301;GO:0016740;GO:0016772;GO:0016776;GO:0019201;GO:0019205;GO:0019904;GO:0030674;GO:0060090	GO:0005654;GO:0005737;GO:0005829;GO:0005886;GO:0005911;GO:0005912;GO:0005923;GO:0016020;GO:0030054;GO:0044422;GO:0044424;GO:0044428;GO:0044444;GO:0044446;GO:0044464;GO:0070160;GO:0070161	REACT_118607;REACT_13579	29	29	29	32.4	32.4	32.4	133.96	251.95	219410000	776	1.17668	-0.296942	0.36116	1.40064	0.159044	-0.601658	-0.0180683	0.844142	1.07265	-1.20207	1.08868	-2.00708	-1.135	-1.36599	1.66512	0.195568	1.24242	-2.41236	0.646082	0.232644	2.28549	0.944693	1.70669	-0.323493	1.12941	0.472656	0.380784	-2.03449	1.4283
+	7.56606	1.53896	Q9NRX5	Q9NRX5	Serine incorporator 1	SERINC1	GO:0006629;GO:0006643;GO:0006644;GO:0006650;GO:0006658;GO:0006665;GO:0006810;GO:0006865;GO:0008152;GO:0008610;GO:0008654;GO:0009058;GO:0009987;GO:0015804;GO:0015807;GO:0015825;GO:0015837;GO:0015849;GO:0019222;GO:0019637;GO:0032329;GO:0043085;GO:0044093;GO:0044237;GO:0044238;GO:0044249;GO:0044255;GO:0046486;GO:0046942;GO:0050789;GO:0050790;GO:0051234;GO:0051338;GO:0051347;GO:0065007;GO:0065009;GO:…	GO:0005215;GO:0005275;GO:0005342;GO:0015171;GO:0015175;GO:0015179;GO:0015194;GO:0022804;GO:0022857;GO:0022889;GO:0022891;GO:0022892;GO:0046943	GO:0005789;GO:0005886;GO:0016020;GO:0016021;GO:0031090;GO:0031224;GO:0031982;GO:0031988;GO:0043226;GO:0043227;GO:0043230;GO:0044421;GO:0044422;GO:0044424;GO:0044425;GO:0044432;GO:0044444;GO:0044446;GO:0044464;GO:0065010;GO:0070062		2	2	2	6.6	6.6	6.6	50.494	29.834	37151000	147	0.575351	-2.2275	-0.151503	-3.6491	-0.676308	0.623678	-1.22719	-2.58299	-0.145086	-1.3251	-1.38924	-4.24225	-4.23287	-2.6664	-0.505613	-3.57168	0.0956478	-2.1287	-0.519413	-3.45164	-0.662212	-0.441847	0.803556	0.00133801	-0.508378	-4.44972	-0.338557	-1.79132	-2.62534
+	8.75541	1.53816	O00339	O00339	Matrilin-2	MATN2	GO:0001764;GO:0006928;GO:0006935;GO:0006950;GO:0007411;GO:0008347;GO:0009605;GO:0009611;GO:0009653;GO:0009987;GO:0016043;GO:0016477;GO:0030030;GO:0031099;GO:0031102;GO:0031104;GO:0032502;GO:0032989;GO:0032990;GO:0033554;GO:0040011;GO:0042221;GO:0042330;GO:0048678;GO:0048812;GO:0048813;GO:0048858;GO:0048869;GO:0048870;GO:0050896;GO:0051716;GO:0071840;GO:0071841;GO:0071842	GO:0005488;GO:0005509;GO:0043167;GO:0043169;GO:0046872	GO:0005578;GO:0005604;GO:0031012;GO:0044420;GO:0044421		9	9	9	13.4	13.4	13.4	106.84	38.549	24555000	74	-0.127765	-1.98147	-1.4404	-3.51597	-0.843407	-4.14655	-1.01733	-2.45981	-0.163212	-3.19915	-1.92658	-4.35992	-4.34347	-4.02759	-1.31279	-4.76985	-3.34099	-3.74166	-2.15403	-4.77596	-3.53446	-3.82042	-2.47741	-5.52934	-3.00971	0.308264	-3.26782	-5.22557	0.706573
+	22.9073	1.532	P29992	P29992	Guanine nucleotide-binding protein subunit alpha-11	GNA11	GO:0001501;GO:0001508;GO:0001775;GO:0006873;GO:0007165;GO:0007166;GO:0007186;GO:0007187;GO:0007188;GO:0007200;GO:0007202;GO:0007212;GO:0007507;GO:0007596;GO:0007599;GO:0008152;GO:0009268;GO:0009628;GO:0009987;GO:0010517;GO:0010518;GO:0010863;GO:0019222;GO:0019725;GO:0019932;GO:0019933;GO:0019935;GO:0030168;GO:0032501;GO:0032502;GO:0035556;GO:0042391;GO:0042592;GO:0043085;GO:0043473;GO:0044093;GO:…	GO:0000166;GO:0001664;GO:0003824;GO:0003924;GO:0004871;GO:0005102;GO:0005488;GO:0005515;GO:0005525;GO:0016462;GO:0016787;GO:0016817;GO:0016818;GO:0017076;GO:0017111;GO:0019001;GO:0031683;GO:0031821;GO:0031826;GO:0032403;GO:0032553;GO:0032555;GO:0032561;GO:0035639;GO:0043167;GO:0043169;GO:0046872;GO:0060089	GO:0005737;GO:0005765;GO:0005774;GO:0005834;GO:0005886;GO:0016020;GO:0019897;GO:0019898;GO:0031090;GO:0031234;GO:0031982;GO:0031988;GO:0032991;GO:0043226;GO:0043227;GO:0043230;GO:0043234;GO:0044421;GO:0044422;GO:0044424;GO:0044425;GO:0044437;GO:0044444;GO:0044446;GO:0044459;GO:0044464;GO:0065010;GO:0070062	REACT_18283;REACT_18405;REACT_19140;REACT_19193;REACT_20647;REACT_21384	21	21	9	63.8	63.8	26.7	42.123	151.21	225790000	784	1.48341	0.223923	0.898531	-2.09615	0.918911	-0.335382	1.05407	-1.04873	1.34232	-1.39575	1.26922	0.279812	-0.536127	-0.764608	1.73421	-0.365896	1.21995	-0.806158	1.4169	0.261207	2.46174	-0.675926	0.91778	0.557408	1.67555	-0.925905	1.28653	-1.13053	1.47114
+	11.6688	1.52947	Q9NTJ4	Q9NTJ4	Alpha-mannosidase 2C1	MAN2C1	GO:0005975;GO:0005996;GO:0006013;GO:0006066;GO:0008152;GO:0009987;GO:0019318;GO:0044237;GO:0044238;GO:0044262;GO:0044281	GO:0003824;GO:0004553;GO:0004559;GO:0005488;GO:0008270;GO:0015923;GO:0016787;GO:0016798;GO:0030246;GO:0043167;GO:0043169;GO:0046872;GO:0046914			8	8	8	12.3	12.3	12.3	115.83	78.27	23744000	120	-1.30926	-1.09358	-1.56998	-4.2484	-1.41273	-0.719124	-1.44897	-2.46709	-1.28586	-4.95065	-0.526026	-1.43369	-4.59167	-3.11666	-0.0414276	-2.49741	-0.473768	-1.81484	-0.344101	-2.7836	-0.225569	-2.41516	-1.78495	-1.1725	-0.873719	-3.57154	-0.914611	-0.439011	-1.26907
+	5.45156	1.52634	P02511	P02511	Alpha-crystallin B chain	CRYAB	GO:0000165;GO:0000226;GO:0000302;GO:0001558;GO:0001666;GO:0002088;GO:0003008;GO:0003012;GO:0006457;GO:0006461;GO:0006915;GO:0006936;GO:0006950;GO:0006979;GO:0006996;GO:0007010;GO:0007017;GO:0007021;GO:0007165;GO:0007243;GO:0007517;GO:0007568;GO:0008152;GO:0008219;GO:0009314;GO:0009628;GO:0009719;GO:0009725;GO:0009892;GO:0009987;GO:0010033;GO:0010035;GO:0010212;GO:0010332;GO:0010466;GO:0010468;GO:…	GO:0005198;GO:0005212;GO:0005488;GO:0005515;GO:0042802;GO:0042803;GO:0043167;GO:0043169;GO:0046872;GO:0046983;GO:0051082	GO:0005634;GO:0005737;GO:0005739;GO:0005794;GO:0005829;GO:0005856;GO:0005886;GO:0009986;GO:0015630;GO:0016020;GO:0030018;GO:0031982;GO:0031988;GO:0032432;GO:0043226;GO:0043227;GO:0043228;GO:0043229;GO:0043230;GO:0043231;GO:0043232;GO:0044421;GO:0044422;GO:0044424;GO:0044430;GO:0044444;GO:0044446;GO:0044449;GO:0044464;GO:0065010;GO:0070062		18	18	18	85.7	85.7	85.7	20.159	323.31	639080000	587	2.06375	4.10751	1.21053	-0.865763	0.945515	-0.384327	2.25447	-0.864057	1.28095	-0.589593	1.53336	0.854193	-1.63136	0.241308	1.04776	-2.32331	-0.83086	-3.23501	0.380016	-0.10826	2.20917	-1.20853	1.82086	-0.958745	0.638984	-2.36232	0.53827	0.331648	-0.0240097
+	22.0699	1.52516	Q9H223	Q9H223	EH domain-containing protein 4	EHD4	GO:0001932;GO:0001934;GO:0006461;GO:0006810;GO:0006897;GO:0006907;GO:0009893;GO:0009987;GO:0010033;GO:0010324;GO:0010562;GO:0010604;GO:0016043;GO:0016044;GO:0016192;GO:0016197;GO:0019220;GO:0019222;GO:0022607;GO:0030100;GO:0031323;GO:0031325;GO:0031399;GO:0031401;GO:0032268;GO:0032270;GO:0032456;GO:0032879;GO:0042221;GO:0042325;GO:0042327;GO:0043933;GO:0045937;GO:0046907;GO:0048518;GO:0048522;GO:…	GO:0000166;GO:0003676;GO:0005488;GO:0005509;GO:0005524;GO:0005525;GO:0017076;GO:0019001;GO:0030554;GO:0032553;GO:0032555;GO:0032559;GO:0032561;GO:0035639;GO:0043167;GO:0043169;GO:0046872	GO:0005634;GO:0005783;GO:0005886;GO:0010008;GO:0016020;GO:0031090;GO:0031901;GO:0031982;GO:0031988;GO:0043226;GO:0043227;GO:0043229;GO:0043230;GO:0043231;GO:0044421;GO:0044422;GO:0044424;GO:0044440;GO:0044444;GO:0044446;GO:0044464;GO:0048471;GO:0055038;GO:0065010;GO:0070062		30	24	24	64.9	56.7	56.7	61.174	323.31	618330000	1149	1.81916	1.90132	2.1792	-1.11622	1.97867	0.58704	2.02567	-0.622928	1.92072	-0.894456	2.2115	0.933191	1.41649	-0.155939	2.43985	1.46995	1.73207	0.228004	2.9424	0.651525	0.293365	0.143309	1.28118	1.49189	2.96948	0.0573311	2.42406	-0.00663376	2.39946
+	8.10729	1.52216	Q7Z5L7	Q7Z5L7	Podocan	PODN	GO:0008285;GO:0030334;GO:0030336;GO:0032879;GO:0040012;GO:0040013;GO:0042127;GO:0048519;GO:0048523;GO:0050789;GO:0050794;GO:0051270;GO:0051271;GO:0065007;GO:2000145;GO:2000146	GO:0005488;GO:0005515;GO:0005518	GO:0005578;GO:0005615;GO:0005737;GO:0031012;GO:0044421;GO:0044424;GO:0044464		15	15	15	29.7	29.7	29.7	68.975	58.009	89941000	188	-0.810397	0.779222	0.276255	-3.32418	-2.70679	-1.62661	1.25915	-3.45056	-0.234766	-2.05214	0.371023	-1.34401	-3.15484	-3.00462	0.210373	-1.57513	0.621735	-3.31299	-0.772881	-1.0186	-0.0246563	-2.41567	1.18825	-2.75131	0.661878	-5.31591	-1.29945	-1.89167	1.06611
+	15.4573	1.51675	P21980	P21980	Protein-glutamine gamma-glutamyltransferase 2	TGM2	GO:0001763;GO:0001974;GO:0002009;GO:0006461;GO:0006464;GO:0006810;GO:0006873;GO:0006874;GO:0006875;GO:0006897;GO:0006909;GO:0007204;GO:0008152;GO:0008284;GO:0009653;GO:0009966;GO:0009967;GO:0009987;GO:0010324;GO:0010627;GO:0010646;GO:0010647;GO:0010740;GO:0010941;GO:0010942;GO:0016043;GO:0016044;GO:0016192;GO:0018149;GO:0018153;GO:0018193;GO:0018199;GO:0018205;GO:0018262;GO:0019538;GO:0019725;GO:…	GO:0000166;GO:0003810;GO:0003824;GO:0005488;GO:0005525;GO:0016740;GO:0016746;GO:0016755;GO:0017076;GO:0019001;GO:0032553;GO:0032555;GO:0032561;GO:0035639;GO:0043167;GO:0043169;GO:0046872	GO:0005739;GO:0005829;GO:0005912;GO:0005924;GO:0005925;GO:0030054;GO:0030055;GO:0031224;GO:0031226;GO:0031982;GO:0031988;GO:0043226;GO:0043227;GO:0043229;GO:0043230;GO:0043231;GO:0044421;GO:0044424;GO:0044425;GO:0044444;GO:0044459;GO:0044464;GO:0065010;GO:0070062;GO:0070161		45	45	42	69.1	69.1	66.1	77.328	323.31	3637000000	3070	4.32453	1.4917	4.35971	1.25008	4.01699	3.46552	5.28904	0.373553	4.80649	2.17045	4.69858	2.93651	3.5818	0.255608	4.84433	3.97719	4.82176	2.52919	4.53687	3.70276	4.00233	2.79681	4.4119	4.6075	4.95909	-0.618452	4.39546	1.2669	4.40202
+	6.64758	1.51544	P35542	P35542	Serum amyloid A-4 protein	SAA4	GO:0002526;GO:0006928;GO:0006935;GO:0006950;GO:0006952;GO:0006953;GO:0006954;GO:0009605;GO:0009611;GO:0009987;GO:0016477;GO:0040011;GO:0042221;GO:0042330;GO:0048870;GO:0050896;GO:0050918;GO:0051716;GO:0060326;GO:0070887	GO:0042056	GO:0005576;GO:0005615;GO:0031982;GO:0031988;GO:0032991;GO:0032994;GO:0034358;GO:0034364;GO:0043226;GO:0043227;GO:0043230;GO:0044421;GO:0065010;GO:0070062		4	4	4	33.8	33.8	33.8	14.746	22.637	108410000	293	1.28257	2.46617	0.356512	-0.936964	2.53579	-0.282877	2.60368	-0.327481	1.31087	-1.86578	2.1278	0.945288	-0.579243	-3.27086	1.48937	-1.66974	0.295336	-3.17449	1.14284	3.71081	2.87549	0.0218582	0.456787	0.513097	-0.821259	-4.15035	2.52862	-0.156925	3.02129
+	10.7472	1.51544	P05546;CON__ENSEMBL:ENSBTAP00000018574	P05546	Heparin cofactor 2	SERPIND1	GO:0006935;GO:0007596;GO:0007599;GO:0009605;GO:0010466;GO:0010951;GO:0019222;GO:0032501;GO:0040011;GO:0042221;GO:0042330;GO:0043086;GO:0044092;GO:0050789;GO:0050790;GO:0050817;GO:0050878;GO:0050896;GO:0051336;GO:0051346;GO:0052547;GO:0052548;GO:0065007;GO:0065008;GO:0065009	GO:0001871;GO:0004857;GO:0004866;GO:0004867;GO:0005488;GO:0005539;GO:0008201;GO:0030234;GO:0030246;GO:0030247;GO:0030414;GO:0061134;GO:0061135	GO:0005576;GO:0005615;GO:0031982;GO:0031988;GO:0043226;GO:0043227;GO:0043230;GO:0044421;GO:0065010;GO:0070062	REACT_1439;REACT_326	19	19	18	48.7	48.7	47.9	57.07	283.71	249890000	662	0.492187	1.36044	1.72554	-1.8736	3.14343	1.48429	2.87658	-0.011344	1.88079	-1.17254	2.43497	-0.0768814	1.3855	-0.367252	3.11777	0.453938	0.528133	-0.417501	2.93149	4.23721	-0.108416	-1.79535	1.39042	1.07769	1.91522	-1.99368	3.41783	-1.03461	3.31185
+	14.9908	1.50688	Q7Z406	Q7Z406	Myosin-14	MYH14	GO:0001508;GO:0003008;GO:0003009;GO:0003012;GO:0006873;GO:0006928;GO:0006935;GO:0006936;GO:0006941;GO:0006996;GO:0007005;GO:0007010;GO:0007165;GO:0007166;GO:0007167;GO:0007169;GO:0007264;GO:0007411;GO:0007519;GO:0007600;GO:0007605;GO:0007610;GO:0008152;GO:0008360;GO:0009605;GO:0009653;GO:0009888;GO:0009987;GO:0014706;GO:0016043;GO:0019228;GO:0019725;GO:0022603;GO:0022604;GO:0030029;GO:0030036;GO:…	GO:0000146;GO:0000166;GO:0003774;GO:0003824;GO:0005488;GO:0005524;GO:0016462;GO:0016787;GO:0016817;GO:0016818;GO:0016887;GO:0017076;GO:0017111;GO:0030554;GO:0030898;GO:0032553;GO:0032555;GO:0032559;GO:0035639;GO:0042623	GO:0001725;GO:0005829;GO:0016020;GO:0016459;GO:0016460;GO:0030424;GO:0030426;GO:0030427;GO:0031982;GO:0031988;GO:0032432;GO:0032991;GO:0042641;GO:0042995;GO:0043005;GO:0043226;GO:0043227;GO:0043230;GO:0043234;GO:0044421;GO:0044422;GO:0044424;GO:0044430;GO:0044444;GO:0044446;GO:0044463;GO:0044464;GO:0065010;GO:0070062	REACT_19277;REACT_264548;REACT_355192;REACT_355303;REACT_355347;REACT_355542	128	114	114	61.6	57	57	227.87	323.31	3413700000	5365	4.93656	4.685	4.0012	4.30215	3.28632	3.62134	3.97966	3.56063	4.65688	2.11254	4.75323	1.601	3.19649	2.46408	5.20967	3.91657	4.46437	2.58756	4.44142	2.35353	5.22607	3.54629	4.6202	4.29944	4.79857	1.87936	4.93112	2.96306	4.83518
+	2.12008	1.50571	O95613	O95613	Pericentrin	PCNT	GO:0000086;GO:0000226;GO:0000278;GO:0001701;GO:0001764;GO:0006928;GO:0006996;GO:0007010;GO:0007017;GO:0007049;GO:0007051;GO:0008283;GO:0009653;GO:0009790;GO:0009792;GO:0009887;GO:0009987;GO:0010927;GO:0010941;GO:0016043;GO:0016477;GO:0021696;GO:0021772;GO:0022402;GO:0022607;GO:0030030;GO:0030031;GO:0032386;GO:0032388;GO:0032501;GO:0032502;GO:0032879;GO:0032880;GO:0033157;GO:0035107;GO:0035108;GO:…		GO:0000242;GO:0005737;GO:0005813;GO:0005814;GO:0005815;GO:0005829;GO:0005874;GO:0005929;GO:0016020;GO:0031514;GO:0032991;GO:0034451;GO:0042995;GO:0043226;GO:0043228;GO:0043229;GO:0043232;GO:0043234;GO:0044421;GO:0044422;GO:0044424;GO:0044430;GO:0044444;GO:0044446;GO:0044450;GO:0044464;GO:0045171	REACT_15296;REACT_15364;REACT_15451;REACT_160315;REACT_267965	12	12	11	4.7	4.7	4.4	378.03	9.1646	3040500000	41	5.4431	6.54934	5.43311	7.50296	6.40966	-4.7256	5.44775	6.90839	5.85173	4.83358	6.11662	6.0083	5.84378	6.48761	7.53948	4.16222	6.83232	-3.16839	6.40648	6.89088	8.60839	6.94102	3.09238	8.72119	6.03856	5.14179	6.34635	5.75007	5.38129
+	2.93601	1.50494	P69892	P69892	Hemoglobin subunit gamma-2	HBG2	GO:0007596;GO:0007599;GO:0032501;GO:0050817;GO:0050878;GO:0065007;GO:0065008	GO:0005215;GO:0005344;GO:0005488;GO:0005506;GO:0019825;GO:0020037;GO:0022892;GO:0043167;GO:0043169;GO:0046872;GO:0046906;GO:0046914	GO:0005829;GO:0005833;GO:0032991;GO:0043234;GO:0044421;GO:0044424;GO:0044444;GO:0044445;GO:0044464;GO:0072562	REACT_24970	20	2	2	95.2	9.5	9.5	16.126	12.01	118330000	66	4.61888	3.25912	-5.01179	-3.83539	-4.66174	-3.10073	-3.08886	-4.2902	1.30458	-1.3262	-4.7053	-3.38048	-4.38726	-4.19053	-1.11698	-4.11957	-3.62605	-3.89122	-4.09072	-3.15774	-3.82691	-4.3543	-3.52243	-3.84937	3.6331	-3.49812	4.14862	-3.20598	-1.09456
+	14.2999	1.49905	P01024	P01024	Complement C3;Complement C3 beta chain;C3-beta-c;Complement C3 alpha chain;C3a anaphylatoxin;Acylation stimulating protein;Complement C3b alpha chain;Complement C3c alpha chain fragment 1;Complement C3dg fragment;Complement C3g fragment;Complement C3d fragment;Complement C3f fragment;Complement C3c alpha chain fragment 2	C3	GO:0001796;GO:0001798;GO:0001817;GO:0001819;GO:0001932;GO:0001934;GO:0001969;GO:0001970;GO:0002252;GO:0002253;GO:0002376;GO:0002673;GO:0002675;GO:0002682;GO:0002684;GO:0002697;GO:0002699;GO:0002703;GO:0002705;GO:0002706;GO:0002708;GO:0002712;GO:0002714;GO:0002819;GO:0002821;GO:0002822;GO:0002824;GO:0002861;GO:0002863;GO:0002864;GO:0002866;GO:0002883;GO:0002885;GO:0002886;GO:0002888;GO:0002889;GO:…	GO:0001664;GO:0004857;GO:0004866;GO:0005102;GO:0005488;GO:0005515;GO:0030234;GO:0030414;GO:0031714;GO:0031715;GO:0061134;GO:0061135	GO:0005576;GO:0005615;GO:0005886;GO:0016020;GO:0031982;GO:0031988;GO:0043226;GO:0043227;GO:0043230;GO:0044421;GO:0044464;GO:0065010;GO:0070062;GO:0072562	REACT_11152;REACT_118707;REACT_14819;REACT_19231;REACT_7972;REACT_8001	130	130	118	80.9	80.9	75.3	187.15	323.31	12402000000	10185	4.19413	5.12034	4.69384	2.19541	6.0619	4.3136	6.13521	3.50081	5.42927	2.41131	5.70217	4.49579	4.52183	2.77045	6.16346	3.92479	4.56628	3.02441	5.92036	7.2108	4.32827	2.45044	4.70629	4.32329	4.44807	0.207968	6.43432	3.20675	6.48222
+	9.57445	1.49335	Q13976	Q13976	cGMP-dependent protein kinase 1	PRKG1	GO:0001764;GO:0003008;GO:0003012;GO:0006140;GO:0006464;GO:0006468;GO:0006793;GO:0006796;GO:0006928;GO:0006937;GO:0006940;GO:0006996;GO:0007010;GO:0007162;GO:0007165;GO:0007596;GO:0007599;GO:0008152;GO:0009894;GO:0009987;GO:0010543;GO:0016043;GO:0016310;GO:0016358;GO:0016477;GO:0019219;GO:0019222;GO:0019538;GO:0019932;GO:0019934;GO:0019935;GO:0022407;GO:0022408;GO:0030029;GO:0030030;GO:0030036;GO:…	GO:0000166;GO:0003824;GO:0004672;GO:0004674;GO:0004690;GO:0004692;GO:0005246;GO:0005488;GO:0005524;GO:0016247;GO:0016301;GO:0016740;GO:0016772;GO:0016773;GO:0017076;GO:0019001;GO:0019002;GO:0030551;GO:0030553;GO:0030554;GO:0032553;GO:0032555;GO:0032559;GO:0032561;GO:0035639	GO:0005737;GO:0005794;GO:0005829;GO:0005886;GO:0016020;GO:0043226;GO:0043227;GO:0043229;GO:0043231;GO:0044424;GO:0044444;GO:0044464	REACT_23767;REACT_23898;REACT_263982	13	13	13	24.4	24.4	24.4	76.364	33.326	77377000	174	-0.803691	-1.64011	0.645559	-2.04136	-1.0933	-2.55042	-0.0534458	-2.88951	-0.962166	-1.46519	-0.262386	-2.8125	-2.26248	-0.880976	1.38473	-1.62111	0.412483	-2.42388	1.33127	-1.15734	-1.27123	-2.47	0.924171	-2.30898	1.48846	-3.27164	-1.88385	-0.300442	0.627453
+	11.2136	1.48557	O60437	O60437	Periplakin	PPL	GO:0031424;GO:0032502	GO:0005198;GO:0005200	GO:0005634;GO:0005739;GO:0005856;GO:0005886;GO:0005911;GO:0016020;GO:0030054;GO:0030057;GO:0031982;GO:0031988;GO:0043226;GO:0043227;GO:0043228;GO:0043229;GO:0043230;GO:0043231;GO:0043232;GO:0044421;GO:0044424;GO:0044444;GO:0044464;GO:0065010;GO:0070062;GO:0070161		127	127	124	69.9	69.9	69.5	204.74	323.31	1854600000	4783	3.72767	1.99111	2.4432	4.33146	1.97845	3.24523	2.26517	2.37554	3.01705	-0.435229	3.22647	0.276789	0.83963	0.242449	2.85456	1.14033	2.21276	0.878338	1.87435	-0.205289	4.45018	3.85948	2.6261	2.04035	2.5762	-0.49354	2.72199	0.364944	2.87654
+	9.12566	1.48314	P21397	P21397	Amine oxidase [flavin-containing] A	MAOA	GO:0001505;GO:0006066;GO:0006576;GO:0006584;GO:0006725;GO:0006805;GO:0006807;GO:0006810;GO:0006836;GO:0007154;GO:0007267;GO:0007268;GO:0007269;GO:0008152;GO:0009056;GO:0009058;GO:0009308;GO:0009310;GO:0009712;GO:0009987;GO:0018958;GO:0019614;GO:0023052;GO:0023061;GO:0032940;GO:0034311;GO:0034313;GO:0034641;GO:0042133;GO:0042135;GO:0042136;GO:0042402;GO:0042417;GO:0042420;GO:0042424;GO:0042537;GO:…	GO:0003824;GO:0008131;GO:0016491;GO:0016638;GO:0016641	GO:0005739;GO:0005741;GO:0016020;GO:0016021;GO:0019867;GO:0031090;GO:0031224;GO:0031966;GO:0031968;GO:0043226;GO:0043227;GO:0043229;GO:0043231;GO:0044422;GO:0044424;GO:0044425;GO:0044429;GO:0044444;GO:0044446;GO:0044464	REACT_15418;REACT_15511;REACT_15532;REACT_15548;REACT_267863;REACT_416	20	20	18	50.5	50.5	48.2	59.681	323.31	536800000	824	1.4534	0.152393	1.79798	1.81402	0.669432	-0.189571	0.825096	-0.486184	1.95301	-1.81832	1.90656	-1.28244	2.69735	0.42771	3.05432	2.05189	3.37711	0.730139	2.69168	0.652648	2.45045	1.15842	2.26223	2.46808	2.06409	1.83864	2.50697	-1.42553	2.76456
+	6.80893	1.48069	Q05707	Q05707	Collagen alpha-1(XIV) chain	COL14A1	GO:0001558;GO:0001894;GO:0003229;GO:0007155;GO:0008152;GO:0009888;GO:0009987;GO:0010611;GO:0014706;GO:0014743;GO:0016043;GO:0016202;GO:0016337;GO:0022411;GO:0022610;GO:0022617;GO:0030198;GO:0030199;GO:0030574;GO:0032501;GO:0032502;GO:0032963;GO:0040008;GO:0042592;GO:0043062;GO:0043170;GO:0043502;GO:0044057;GO:0044236;GO:0044243;GO:0044259;GO:0045595;GO:0046620;GO:0048634;GO:0048638;GO:0048738;GO:…	GO:0005198;GO:0005201;GO:0005488;GO:0005515;GO:0005518;GO:0030674;GO:0060090	GO:0005576;GO:0005578;GO:0005581;GO:0005593;GO:0005596;GO:0005614;GO:0005615;GO:0005788;GO:0030934;GO:0031012;GO:0031974;GO:0031982;GO:0031988;GO:0043226;GO:0043227;GO:0043230;GO:0043233;GO:0044420;GO:0044421;GO:0044422;GO:0044424;GO:0044432;GO:0044444;GO:0044446;GO:0044464;GO:0065010;GO:0070013;GO:0070062	REACT_121139;REACT_150401	63	63	61	50.4	50.4	48.3	193.51	323.31	1474800000	2614	1.85954	0.608271	2.81292	0.126955	4.98189	3.13323	3.72918	-0.937106	2.58263	0.465014	3.50704	2.23564	2.85402	-1.82266	0.881264	0.324783	0.203449	-1.16925	2.71566	-0.00748348	1.19214	0.573032	1.36316	1.04008	1.59451	-2.90067	0.69255	0.614626	2.40993
+	9.29847	1.47846	O43556	O43556	Epsilon-sarcoglycan	SGCE	GO:0007155;GO:0007160;GO:0007517;GO:0009987;GO:0022610;GO:0031589;GO:0032502;GO:0048513;GO:0048856;GO:0061061	GO:0005488;GO:0005509;GO:0043167;GO:0043169;GO:0046872	GO:0005794;GO:0005856;GO:0005886;GO:0005887;GO:0016010;GO:0016012;GO:0016020;GO:0016021;GO:0030425;GO:0031224;GO:0031226;GO:0031253;GO:0031256;GO:0032589;GO:0032590;GO:0032991;GO:0042383;GO:0042995;GO:0043005;GO:0043226;GO:0043227;GO:0043228;GO:0043229;GO:0043231;GO:0043232;GO:0043234;GO:0044424;GO:0044425;GO:0044444;GO:0044459;GO:0044463;GO:0044464		7	7	6	27.7	27.7	25.6	49.85	53.107	33145000	152	0.511804	-4.20654	-0.452404	-2.59631	-1.14019	-2.20629	-1.35884	-3.60785	-0.944181	-0.715003	-1.09539	-2.20494	-3.27849	-3.10696	-2.16401	-3.31135	-0.682943	-3.83984	-1.66271	-2.95289	-0.889427	-2.75224	-1.15047	-0.219451	-0.0647364	-7.51169	-1.58849	-2.92938	-1.13267
+	12.9265	1.47301	O76074	O76074	cGMP-specific 3,5-cyclic phosphodiesterase	PDE5A	GO:0001932;GO:0002682;GO:0002683;GO:0002694;GO:0002695;GO:0003008;GO:0003012;GO:0006139;GO:0006140;GO:0006163;GO:0006195;GO:0006753;GO:0006807;GO:0006937;GO:0006942;GO:0007165;GO:0007596;GO:0007599;GO:0008016;GO:0008152;GO:0008285;GO:0009056;GO:0009117;GO:0009123;GO:0009125;GO:0009166;GO:0009187;GO:0009214;GO:0009966;GO:0009987;GO:0010611;GO:0010613;GO:0010720;GO:0014742;GO:0014743;GO:0019219;GO:…	GO:0000166;GO:0003824;GO:0004112;GO:0004114;GO:0005488;GO:0008081;GO:0016787;GO:0016788;GO:0017076;GO:0019001;GO:0019002;GO:0030551;GO:0030553;GO:0032553;GO:0032555;GO:0032561;GO:0042578;GO:0043167;GO:0043169;GO:0046872;GO:0047555	GO:0005829;GO:0044424;GO:0044444;GO:0044464	REACT_23767	10	10	10	18.2	18.2	18.2	99.984	62.326	30570000	88	-1.65726	-4.19248	-1.22827	-1.62791	-2.04909	-1.84714	-1.64124	-4.03385	-1.85066	-2.17032	-1.09803	-3.10308	-3.37553	-2.96172	-0.322826	-4.9925	-2.19415	-3.50583	-0.686518	-3.17628	-0.171135	-1.65539	-1.96437	-2.63153	-1.2059	-3.02199	-1.9893	-3.74048	-0.499693
+	11.073	1.47286	Q9UN36	Q9UN36	Protein NDRG2	NDRG2	GO:0001817;GO:0001818;GO:0007165;GO:0007166;GO:0008285;GO:0009966;GO:0009968;GO:0009987;GO:0010574;GO:0010627;GO:0010646;GO:0010648;GO:0010741;GO:0016055;GO:0021762;GO:0023051;GO:0023057;GO:0030154;GO:0032502;GO:0042127;GO:0043408;GO:0043409;GO:0048519;GO:0048523;GO:0048583;GO:0048585;GO:0048660;GO:0048662;GO:0048856;GO:0048869;GO:0050789;GO:0050794;GO:0050896;GO:0051239;GO:0051241;GO:0051716;GO:…		GO:0005654;GO:0005737;GO:0005794;GO:0005813;GO:0005815;GO:0005829;GO:0030426;GO:0030427;GO:0031982;GO:0031988;GO:0043226;GO:0043227;GO:0043228;GO:0043229;GO:0043230;GO:0043231;GO:0043232;GO:0044421;GO:0044422;GO:0044424;GO:0044428;GO:0044430;GO:0044444;GO:0044446;GO:0044463;GO:0044464;GO:0048471;GO:0065010;GO:0070062		11	11	10	51.5	51.5	45.3	40.798	209.42	117320000	374	1.44018	0.432535	0.518116	1.50305	0.977707	0.2801	0.953611	0.336196	1.34315	-1.85177	1.05604	-1.22759	-2.54016	-1.13616	0.414509	-1.45396	0.0993958	0.54608	0.403002	-3.66489	1.74334	1.5205	1.05878	0.310172	0.545365	0.604746	0.18193	-1.15597	0.0529041
+	12.0326	1.46896	P09467	P09467	Fructose-1,6-bisphosphatase 1	FBP1	GO:0001558;GO:0005975;GO:0005996;GO:0006000;GO:0006002;GO:0006006;GO:0006066;GO:0006094;GO:0006109;GO:0006110;GO:0006111;GO:0006461;GO:0006793;GO:0006796;GO:0008152;GO:0009058;GO:0009889;GO:0009892;GO:0009894;GO:0009895;GO:0009966;GO:0009968;GO:0009987;GO:0010035;GO:0010038;GO:0010565;GO:0010605;GO:0010646;GO:0010648;GO:0010675;GO:0010677;GO:0010906;GO:0016043;GO:0016051;GO:0016311;GO:0019222;GO:…	GO:0000166;GO:0003824;GO:0005488;GO:0005515;GO:0005529;GO:0016208;GO:0016787;GO:0016788;GO:0016791;GO:0017076;GO:0019203;GO:0030246;GO:0030554;GO:0032553;GO:0032555;GO:0032559;GO:0042132;GO:0042578;GO:0042802;GO:0043167;GO:0043169;GO:0046872;GO:0048029;GO:0050308	GO:0005737;GO:0005829;GO:0031982;GO:0031988;GO:0043226;GO:0043227;GO:0043230;GO:0044421;GO:0044424;GO:0044444;GO:0044464;GO:0065010;GO:0070062	REACT_1520	22	22	20	60.1	60.1	56.8	36.842	323.31	2027200000	1972	4.52647	3.11325	4.48274	2.48765	4.0256	4.15355	4.6474	-0.166032	4.24128	3.35719	4.44783	4.74833	4.05517	0.816183	3.75018	3.12732	5.09018	1.67629	4.97671	2.68028	4.77168	4.30511	5.29441	3.9504	5.06876	-0.438343	5.72131	3.38117	3.62295
+	15.0373	1.46421	Q4KMQ2	Q4KMQ2	Anoctamin-6	ANO6	GO:0002376;GO:0002407;GO:0002543;GO:0006810;GO:0006811;GO:0006812;GO:0006820;GO:0006821;GO:0006928;GO:0006935;GO:0007009;GO:0007596;GO:0007599;GO:0009605;GO:0009888;GO:0009987;GO:0010941;GO:0010942;GO:0015698;GO:0016043;GO:0016044;GO:0016477;GO:0017121;GO:0030193;GO:0030194;GO:0030282;GO:0030595;GO:0031214;GO:0032101;GO:0032501;GO:0032502;GO:0034220;GO:0035630;GO:0040011;GO:0042221;GO:0042330;GO:…	GO:0005215;GO:0005216;GO:0005227;GO:0005229;GO:0005244;GO:0005247;GO:0005253;GO:0005254;GO:0005261;GO:0005319;GO:0005548;GO:0008308;GO:0008324;GO:0008509;GO:0015075;GO:0015267;GO:0017128;GO:0022803;GO:0022832;GO:0022836;GO:0022838;GO:0022839;GO:0022857;GO:0022891;GO:0022892	GO:0005622;GO:0005886;GO:0009986;GO:0016020;GO:0031982;GO:0031988;GO:0032991;GO:0034702;GO:0034707;GO:0043226;GO:0043227;GO:0043230;GO:0043234;GO:0044421;GO:0044425;GO:0044464;GO:0065010;GO:0070062	REACT_160189	17	17	15	21.4	21.4	18.6	106.16	132.97	90075000	276	0.78791	-2.09706	0.546329	-2.73313	-0.338993	-1.57699	-0.0517902	-2.10678	-0.12483	-3.39064	0.5907	-1.4235	-1.8366	-1.16781	-0.128342	-0.482161	0.130754	-2.025	0.388134	-0.789617	-0.218651	-1.51099	-0.542225	-1.68071	0.469399	-3.21819	-0.844941	-2.24829	0.580629
+	15.6783	1.46354	Q07157	Q07157	Tight junction protein ZO-1	TJP1	GO:0001678;GO:0001825;GO:0002237;GO:0003008;GO:0003013;GO:0003018;GO:0006915;GO:0006921;GO:0007043;GO:0007165;GO:0007600;GO:0007605;GO:0008219;GO:0009607;GO:0009628;GO:0009743;GO:0009746;GO:0009749;GO:0009987;GO:0010033;GO:0012501;GO:0016043;GO:0016265;GO:0019725;GO:0022411;GO:0022607;GO:0032496;GO:0032501;GO:0032502;GO:0033500;GO:0034284;GO:0034329;GO:0034330;GO:0035329;GO:0035556;GO:0042221;GO:…		GO:0005634;GO:0005737;GO:0005829;GO:0005886;GO:0005911;GO:0005912;GO:0005913;GO:0005921;GO:0005923;GO:0014704;GO:0016020;GO:0016323;GO:0016324;GO:0016327;GO:0030054;GO:0043226;GO:0043227;GO:0043229;GO:0043231;GO:0043296;GO:0044291;GO:0044424;GO:0044425;GO:0044444;GO:0044459;GO:0044464;GO:0045177;GO:0046581;GO:0070160;GO:0070161	REACT_11043;REACT_118607;REACT_13579	62	62	62	49.9	49.9	49.9	195.46	323.31	460450000	1495	1.70119	-0.182526	1.33722	1.9415	0.702456	0.527441	0.611212	-0.403195	1.52867	-0.0703745	1.66925	-0.524134	-1.24263	-0.739061	1.9635	0.175158	1.24816	-0.932598	1.63147	-2.40197	2.65648	0.869257	1.14503	0.375075	1.43921	-0.349634	1.28114	-0.0684795	1.71953
+	9.41479	1.46333	Q9Y4J8	Q9Y4J8	Dystrobrevin alpha	DTNA	GO:0003008;GO:0003012;GO:0006936;GO:0006941;GO:0007154;GO:0007165;GO:0007267;GO:0007268;GO:0007274;GO:0009987;GO:0023052;GO:0032501;GO:0050789;GO:0050794;GO:0050896;GO:0051716;GO:0065007	GO:0005488;GO:0008270;GO:0043167;GO:0043169;GO:0046872;GO:0046914	GO:0005737;GO:0005886;GO:0016020;GO:0019897;GO:0019898;GO:0030054;GO:0030424;GO:0031234;GO:0032991;GO:0042383;GO:0042995;GO:0043005;GO:0043234;GO:0044424;GO:0044425;GO:0044459;GO:0044464;GO:0045202		8	8	5	15.6	15.6	9.8	83.9	45.786	26660000	65	-1.38991	-4.15896	-1.95888	-5.39383	-3.80901	-2.07751	-2.38302	-3.95792	-2.04292	-4.27457	-1.02881	-4.17848	-3.5775	-4.27369	-1.14277	-3.12173	0.447302	-2.26057	-1.62857	-3.19937	-1.18851	-4.18409	0.572546	-2.68896	0.188563	-4.157	-3.64181	-2.68559	-3.16689
+	13.0278	1.46009	Q5K4L6	Q5K4L6	Long-chain fatty acid transport protein 3	SLC27A3		GO:0000166;GO:0003824;GO:0004321;GO:0004467;GO:0005488;GO:0015645;GO:0016408;GO:0016740;GO:0016746;GO:0016747;GO:0016874;GO:0016877;GO:0031957	GO:0016020;GO:0016021;GO:0031090;GO:0031224;GO:0031966;GO:0044422;GO:0044424;GO:0044425;GO:0044429;GO:0044444;GO:0044446;GO:0044464		11	11	10	30.2	30.2	27.1	73.55	172.62	100010000	359	0.215774	-1.13562	0.602106	-1.98341	-0.0187626	-0.594086	-0.257074	-1.81677	-1.15605	-3.82369	0.415152	-1.7887	0.171253	-0.231567	0.818657	-0.656694	0.989733	-2.37163	0.278582	-2.41462	1.14718	0.307266	0.845066	0.170272	0.721784	-0.699295	0.779433	-0.301029	1.02195
+	5.88216	1.45997	P51911	P51911	Calponin-1	CNN1	GO:0006937;GO:0006940;GO:0006996;GO:0007010;GO:0009987;GO:0016043;GO:0030029;GO:0030036;GO:0031032;GO:0044057;GO:0050789;GO:0051239;GO:0065007;GO:0071840;GO:0071841;GO:0071842;GO:0090257		GO:0005856;GO:0005912;GO:0005924;GO:0005925;GO:0030054;GO:0030055;GO:0043226;GO:0043228;GO:0043229;GO:0043232;GO:0044424;GO:0044464;GO:0070161		23	23	22	76.8	76.8	68	33.17	323.31	463610000	750	0.774041	-2.11858	2.62868	-2.52379	1.9209	0.748573	1.77306	-3.0417	1.69737	-1.20749	1.46477	1.86514	-1.80173	-2.20556	1.59786	0.0982895	1.88326	-1.61819	1.98949	-1.29624	0.889629	-1.49657	3.91475	-0.895555	3.44566	-1.25811	-0.258143	-0.408117	0.541229
+	7.31148	1.45072	P08294	P08294	Extracellular superoxide dismutase [Cu-Zn]	SOD3	GO:0000302;GO:0000303;GO:0000305;GO:0001666;GO:0006801;GO:0006950;GO:0006979;GO:0008152;GO:0009987;GO:0010035;GO:0010038;GO:0019430;GO:0033554;GO:0034599;GO:0034614;GO:0042221;GO:0044237;GO:0046688;GO:0050896;GO:0051716;GO:0070482;GO:0070887;GO:0071450;GO:0071451;GO:0072593	GO:0001871;GO:0003824;GO:0004784;GO:0005488;GO:0005507;GO:0005539;GO:0008201;GO:0008270;GO:0016209;GO:0016491;GO:0016721;GO:0030246;GO:0030247;GO:0043167;GO:0043169;GO:0046872;GO:0046914	GO:0005576;GO:0005615;GO:0005634;GO:0005737;GO:0005796;GO:0005802;GO:0031012;GO:0031974;GO:0031982;GO:0031988;GO:0043226;GO:0043227;GO:0043229;GO:0043230;GO:0043231;GO:0043233;GO:0044421;GO:0044422;GO:0044424;GO:0044431;GO:0044444;GO:0044446;GO:0044464;GO:0065010;GO:0070013;GO:0070062	REACT_264249	9	9	8	40	40	33.3	25.851	188.28	308480000	368	3.60509	1.72179	2.34421	1.09304	2.67004	1.19817	3.62097	-0.716506	2.1951	1.32415	2.581	2.16478	-4.40131	-0.168489	2.05837	0.308903	1.58401	-1.87457	1.29686	0.327455	3.38447	2.24099	3.27781	0.312716	2.35875	-5.17976	1.39616	-2.20081	1.85451
+	11.4213	1.43982	Q9Y3I1	Q9Y3I1	F-box only protein 7	FBXO7	GO:0000079;GO:0000422;GO:0001932;GO:0002682;GO:0002683;GO:0002694;GO:0002695;GO:0006464;GO:0006469;GO:0006508;GO:0006511;GO:0006605;GO:0006626;GO:0006810;GO:0006839;GO:0006886;GO:0006914;GO:0007346;GO:0008152;GO:0009056;GO:0009057;GO:0009987;GO:0010468;GO:0010564;GO:0010608;GO:0010948;GO:0015031;GO:0016567;GO:0017038;GO:0019220;GO:0019222;GO:0019538;GO:0019941;GO:0031323;GO:0031399;GO:0031647;GO:…	GO:0003824;GO:0004842;GO:0016874;GO:0016879;GO:0016881;GO:0019787	GO:0000151;GO:0005634;GO:0005737;GO:0005739;GO:0005829;GO:0032991;GO:0043226;GO:0043227;GO:0043229;GO:0043231;GO:0043234;GO:0044424;GO:0044444;GO:0044464		9	9	7	21.3	21.3	13.2	58.502	59.191	87592000	341	-0.366561	-1.84432	-0.105261	-2.57159	1.85976	0.173908	0.457561	-1.1877	1.38553	-0.621978	0.710934	-2.4572	-1.34967	-1.58878	1.00661	-1.67022	-0.946142	-2.05427	1.56734	2.59499	-1.65695	-3.85067	0.810326	-0.259313	0.393958	-2.2515	1.04451	-0.864342	0.437195
+	3.82266	1.4333	Q9H6R3	Q9H6R3	Acyl-CoA synthetase short-chain family member 3, mitochondrial	ACSS3		GO:0000166;GO:0003824;GO:0003987;GO:0005488;GO:0005524;GO:0016405;GO:0016874;GO:0016877;GO:0016878;GO:0017076;GO:0030554;GO:0032553;GO:0032555;GO:0032559;GO:0035639	GO:0005739;GO:0043226;GO:0043227;GO:0043229;GO:0043231;GO:0044424;GO:0044444;GO:0044464		10	10	10	20.4	20.4	20.4	74.777	24.513	72058000	34	-0.928966	0.504745	-0.855087	-0.85327	-4.17331	-3.61246	-4.17829	0.118989	-3.73481	-3.33585	-2.29364	-2.72237	0.8176	-0.908142	0.393131	2.16411	3.7362	-2.06003	1.26528	-5.09486	2.12933	-3.1323	-0.0634003	1.37809	-0.878131	-1.48412	1.93435	-0.755459	0.447084
+	4.64343	1.43194	P13987	P13987	CD59 glycoprotein	CD59	GO:0001775;GO:0001969;GO:0001971;GO:0002376;GO:0002673;GO:0002682;GO:0002683;GO:0002684;GO:0002694;GO:0002696;GO:0002697;GO:0002698;GO:0002920;GO:0002921;GO:0006950;GO:0006952;GO:0006955;GO:0007165;GO:0007166;GO:0007596;GO:0007599;GO:0008284;GO:0009892;GO:0009987;GO:0010468;GO:0010605;GO:0010941;GO:0010955;GO:0019222;GO:0030449;GO:0031347;GO:0032101;GO:0032501;GO:0032944;GO:0032946;GO:0042102;GO:…	GO:0001848;GO:0005488;GO:0005515	GO:0005576;GO:0005615;GO:0005886;GO:0005912;GO:0005924;GO:0005925;GO:0009986;GO:0016020;GO:0030054;GO:0030055;GO:0031224;GO:0031225;GO:0031226;GO:0031233;GO:0031362;GO:0031982;GO:0031988;GO:0042383;GO:0043218;GO:0043226;GO:0043227;GO:0043230;GO:0044421;GO:0044425;GO:0044459;GO:0044464;GO:0046658;GO:0065010;GO:0070062;GO:0070161	REACT_118707	4	4	4	19.5	19.5	19.5	14.177	11.027	66678000	58	3.60479	-3.86538	-0.193903	3.51555	0.763281	-1.62561	-0.478315	-3.80009	0.389879	-0.426452	-0.253008	-4.16312	-1.55421	-4.44121	-1.01546	-2.21142	-0.976885	-3.72424	-0.511162	-3.58708	3.44744	0.351019	3.05702	-2.87395	-0.346328	-5.08627	-0.242679	-2.5194	-0.152401
+	9.85109	1.43029	P53708	P53708	Integrin alpha-8;Integrin alpha-8 heavy chain;Integrin alpha-8 light chain	ITGA8	GO:0000902;GO:0000904;GO:0001656;GO:0001822;GO:0003008;GO:0006355;GO:0006357;GO:0007155;GO:0007160;GO:0007165;GO:0007166;GO:0007229;GO:0007420;GO:0007610;GO:0007611;GO:0007613;GO:0009653;GO:0009888;GO:0009889;GO:0009891;GO:0009893;GO:0009966;GO:0009967;GO:0009987;GO:0010468;GO:0010556;GO:0010557;GO:0010604;GO:0010628;GO:0010646;GO:0010647;GO:0016043;GO:0016337;GO:0017015;GO:0019219;GO:0019222;GO:…	GO:0005488;GO:0043167;GO:0043169;GO:0046872	GO:0005783;GO:0005886;GO:0005912;GO:0005924;GO:0005925;GO:0008305;GO:0009986;GO:0014069;GO:0016020;GO:0030054;GO:0030055;GO:0031253;GO:0031256;GO:0032589;GO:0032591;GO:0032991;GO:0034678;GO:0043204;GO:0043226;GO:0043227;GO:0043229;GO:0043231;GO:0043234;GO:0043235;GO:0044422;GO:0044424;GO:0044425;GO:0044430;GO:0044444;GO:0044446;GO:0044456;GO:0044459;GO:0044463;GO:0044464;GO:0045177;GO:0070161	REACT_13552;REACT_150331;REACT_163906	6	6	6	9.5	9.5	9.5	117.47	8.6608	17846000	29	-1.4491	-3.41663	-1.8672	-2.7398	-1.32975	-4.50551	-1.3532	-4.63586	-1.55864	-2.68614	-2.06641	-3.52925	-3.61352	-3.98474	-0.972059	-3.82072	-4.03046	-3.99878	-1.25	-3.30921	-3.27384	-3.36679	-3.71011	-0.743203	0.713576	-4.74707	-4.09383	-4.45038	-3.41781
+	6.14418	1.42544	Q14315	Q14315	Filamin-C	FLNC	GO:0009987;GO:0016043;GO:0022607;GO:0032502;GO:0034329;GO:0034330;GO:0048468;GO:0048747;GO:0048856;GO:0048869;GO:0055001;GO:0055002;GO:0071840;GO:0071841;GO:0071842;GO:0071844	GO:0005488;GO:0005515;GO:0008092;GO:0030506	GO:0005737;GO:0005829;GO:0005856;GO:0005886;GO:0005912;GO:0005924;GO:0005925;GO:0016020;GO:0016528;GO:0030018;GO:0030054;GO:0030055;GO:0042383;GO:0043034;GO:0043226;GO:0043228;GO:0043229;GO:0043232;GO:0044422;GO:0044424;GO:0044444;GO:0044449;GO:0044464;GO:0070161	REACT_20649	77	65	61	39.2	34.5	31.6	291.02	323.31	262610000	851	0.40809	-2.08191	1.59871	-2.0544	1.86495	-0.237967	0.199131	-2.60575	1.02789	-1.95668	1.59562	1.14825	-0.0941181	-0.299646	0.161011	-0.885693	1.06572	-1.9573	0.47703	-4.44778	1.97722	-1.74659	2.18023	-2.06444	1.51913	-5.05747	-2.54615	-2.16505	0.76375
+	5.6847	1.41725	P07357	P07357	Complement component C8 alpha chain	C8A	GO:0002252;GO:0002253;GO:0002376;GO:0002673;GO:0002682;GO:0002684;GO:0002697;GO:0002920;GO:0006950;GO:0006952;GO:0006955;GO:0006956;GO:0006957;GO:0006958;GO:0006959;GO:0008152;GO:0008219;GO:0009987;GO:0010468;GO:0016265;GO:0019222;GO:0019538;GO:0019835;GO:0030449;GO:0031347;GO:0032101;GO:0043170;GO:0044238;GO:0045087;GO:0048518;GO:0048583;GO:0048584;GO:0050727;GO:0050776;GO:0050778;GO:0050789;GO:…		GO:0005576;GO:0005579;GO:0005615;GO:0016020;GO:0031982;GO:0031988;GO:0032991;GO:0043226;GO:0043227;GO:0043230;GO:0043234;GO:0044421;GO:0044425;GO:0044459;GO:0044464;GO:0046930;GO:0065010;GO:0070062;GO:0072562	REACT_118707;REACT_8028	14	14	12	34.4	34.4	30.3	65.163	172.26	144410000	365	-1.20669	2.21718	-0.660769	-3.83262	1.86157	-0.950703	1.26934	-3.64437	-0.369747	-1.45974	0.736876	-0.235703	0.195429	-0.115246	1.37345	-1.22081	0.159718	-2.70657	2.03936	4.59593	-1.05905	-2.97052	1.15011	0.355758	0.224988	-5.01746	1.55414	-2.29583	2.15133
+	11.5059	1.41566	Q14624	Q14624	Inter-alpha-trypsin inhibitor heavy chain H4;70 kDa inter-alpha-trypsin inhibitor heavy chain H4;35 kDa inter-alpha-trypsin inhibitor heavy chain H4	ITIH4	GO:0002526;GO:0005975;GO:0005976;GO:0006022;GO:0006807;GO:0006950;GO:0006952;GO:0006953;GO:0006954;GO:0008152;GO:0009308;GO:0009611;GO:0010033;GO:0010466;GO:0010951;GO:0019222;GO:0030203;GO:0030212;GO:0034097;GO:0042221;GO:0043086;GO:0043170;GO:0044092;GO:0044238;GO:0050789;GO:0050790;GO:0050896;GO:0051336;GO:0051346;GO:0052547;GO:0052548;GO:0065007;GO:0065009	GO:0004857;GO:0004866;GO:0004867;GO:0030234;GO:0030414;GO:0061134;GO:0061135	GO:0005576;GO:0005737;GO:0005886;GO:0016020;GO:0031982;GO:0031988;GO:0043226;GO:0043227;GO:0043230;GO:0044421;GO:0044424;GO:0044464;GO:0065010;GO:0070062;GO:0072562		37	37	36	46.5	46.5	45.4	103.36	323.31	1471900000	2181	2.72582	4.62904	2.90997	1.20351	4.63348	2.96183	4.47042	2.1082	4.29725	2.27723	4.37372	3.17539	2.77008	1.37629	4.42219	1.94442	2.93104	1.04025	4.38826	5.85627	3.60948	1.74431	3.26695	1.71926	2.71729	-1.26647	4.63848	1.90382	4.90328
+	7.83385	1.41086	Q16850	Q16850	Lanosterol 14-alpha demethylase	CYP51A1	GO:0006066;GO:0006629;GO:0006694;GO:0006695;GO:0006730;GO:0006805;GO:0008152;GO:0008202;GO:0008203;GO:0008610;GO:0009058;GO:0009987;GO:0016125;GO:0016126;GO:0033488;GO:0044237;GO:0044238;GO:0044281;GO:0070988	GO:0003824;GO:0004497;GO:0005488;GO:0005506;GO:0008398;GO:0016491;GO:0016705;GO:0016709;GO:0020037;GO:0032451;GO:0043167;GO:0043169;GO:0046872;GO:0046906;GO:0046914	GO:0005783;GO:0005789;GO:0016020;GO:0016021;GO:0031090;GO:0031224;GO:0043226;GO:0043227;GO:0043229;GO:0043231;GO:0044422;GO:0044424;GO:0044425;GO:0044432;GO:0044444;GO:0044446;GO:0044464	REACT_13812;REACT_147904;REACT_9405	10	10	9	26.3	26.3	22.2	57.278	58.951	44632000	167	0.132411	-3.11019	-1.322	-3.30758	-1.94394	-4.19692	-1.14324	-3.07488	-1.51811	-4.23151	-2.20252	-3.64581	-4.90419	-0.231293	-0.833385	-0.598911	0.240059	-3.79542	-0.377853	-0.362491	-1.46256	-4.94487	-1.03148	-3.32043	-0.539039	-1.50685	-0.82331	-0.950653	0.172974
+	5.95217	1.40962	P01833	P01833	Polymeric immunoglobulin receptor;Secretory component	PIGR	GO:0001580;GO:0001894;GO:0001895;GO:0002414;GO:0002415;GO:0006810;GO:0007165;GO:0007166;GO:0007167;GO:0007169;GO:0007173;GO:0008104;GO:0009593;GO:0009987;GO:0016043;GO:0016044;GO:0016192;GO:0033036;GO:0034613;GO:0042221;GO:0042592;GO:0043113;GO:0045056;GO:0050789;GO:0050794;GO:0050896;GO:0050906;GO:0050907;GO:0050912;GO:0051179;GO:0051234;GO:0051606;GO:0051641;GO:0051716;GO:0060249;GO:0061024;GO:…	GO:0001790;GO:0001792;GO:0004871;GO:0004872;GO:0004888;GO:0005488;GO:0005515;GO:0019763;GO:0019865;GO:0032403;GO:0038023;GO:0060089	GO:0005615;GO:0005886;GO:0005887;GO:0016020;GO:0016021;GO:0031224;GO:0031226;GO:0031982;GO:0031988;GO:0032991;GO:0043226;GO:0043227;GO:0043230;GO:0043234;GO:0043235;GO:0044421;GO:0044425;GO:0044459;GO:0044464;GO:0065010;GO:0070062		38	38	35	60.2	60.2	58.2	83.283	323.31	476110000	849	1.7551	-0.551289	0.596834	-1.02416	2.46767	2.72935	2.54005	-0.210559	0.365866	-3.0359	0.794033	-0.784405	2.84863	-2.91573	1.90172	2.02617	2.18847	-0.596321	3.2138	1.03239	-0.751913	0.229343	0.0230293	1.94405	1.98832	-3.49837	1.07723	-4.16485	2.38392
+	17.0129	1.4026	Q09666	Q09666	Neuroblast differentiation-associated protein AHNAK	AHNAK	GO:0006461;GO:0010468;GO:0016043;GO:0019219;GO:0019222;GO:0022607;GO:0031323;GO:0043484;GO:0043933;GO:0050789;GO:0050794;GO:0051171;GO:0051252;GO:0051259;GO:0060255;GO:0065003;GO:0065007;GO:0071822;GO:0071840;GO:0080090		GO:0005634;GO:0005737;GO:0005765;GO:0005774;GO:0005829;GO:0005856;GO:0005886;GO:0005911;GO:0005912;GO:0005924;GO:0005925;GO:0015629;GO:0016020;GO:0030054;GO:0030055;GO:0030315;GO:0031090;GO:0031982;GO:0031988;GO:0042383;GO:0043034;GO:0043226;GO:0043227;GO:0043228;GO:0043229;GO:0043230;GO:0043231;GO:0043232;GO:0044291;GO:0044421;GO:0044422;GO:0044424;GO:0044425;GO:0044437;GO:0044444;GO:0044446;GO:…		402	402	399	82.5	82.5	82.5	629.09	323.31	25373000000	24822	6.37215	2.88231	5.71279	5.79059	5.68526	4.68682	5.49478	5.13087	5.68551	4.10525	6.05507	5.01467	3.52697	3.76348	5.69227	3.50041	4.85659	3.733	5.13743	2.00759	5.88058	6.16127	5.13002	4.48376	5.12762	3.22426	5.04993	2.80738	5.58453
+	6.73243	1.40059	P13747	P13747	HLA class I histocompatibility antigen, alpha chain E	HLA-E	GO:0001817;GO:0001819;GO:0001910;GO:0001911;GO:0001912;GO:0001914;GO:0001916;GO:0002250;GO:0002376;GO:0002428;GO:0002474;GO:0002475;GO:0002476;GO:0002478;GO:0002479;GO:0002480;GO:0002483;GO:0002637;GO:0002682;GO:0002683;GO:0002684;GO:0002694;GO:0002696;GO:0002697;GO:0002698;GO:0002699;GO:0002700;GO:0002703;GO:0002704;GO:0002705;GO:0002706;GO:0002707;GO:0002708;GO:0002709;GO:0002711;GO:0002715;GO:…	GO:0003823;GO:0005102;GO:0005488;GO:0005515;GO:0030881;GO:0042277;GO:0042287;GO:0042288;GO:0042605;GO:0046703	GO:0000139;GO:0005886;GO:0009986;GO:0010008;GO:0012506;GO:0012507;GO:0016020;GO:0016021;GO:0030176;GO:0030658;GO:0030659;GO:0030662;GO:0030666;GO:0030670;GO:0031090;GO:0031224;GO:0031227;GO:0031300;GO:0031301;GO:0031901;GO:0031982;GO:0031988;GO:0032398;GO:0032991;GO:0042611;GO:0042612;GO:0043226;GO:0043227;GO:0043230;GO:0043234;GO:0044421;GO:0044422;GO:0044424;GO:0044425;GO:0044431;GO:0044432;GO:…	REACT_111168;REACT_111178;REACT_11152;REACT_147694;REACT_147814;REACT_25078;REACT_25162;REACT_75795	7	5	5	23.7	16.2	16.2	40.057	47.284	59388000	182	0.945483	-4.30144	0.900517	-1.0941	0.342976	0.0458813	-0.624844	-1.51342	1.00441	-2.38978	2.11698	0.741873	-0.157873	0.125736	0.724726	-1.25012	0.496746	-0.682585	0.630857	-3.06452	0.374187	-0.514126	-3.94266	-3.54267	-1.79409	-0.212349	-1.71379	-3.28944	-1.92323
+	8.9201	1.3924	P04003;CON__Q28065	P04003	C4b-binding protein alpha chain	C4BPA	GO:0002252;GO:0002253;GO:0002376;GO:0002673;GO:0002682;GO:0002683;GO:0002684;GO:0002697;GO:0002698;GO:0002703;GO:0002706;GO:0002712;GO:0002819;GO:0002822;GO:0002889;GO:0002920;GO:0002921;GO:0002923;GO:0006950;GO:0006952;GO:0006955;GO:0006956;GO:0006958;GO:0006959;GO:0008152;GO:0009892;GO:0009893;GO:0009894;GO:0009896;GO:0010468;GO:0010604;GO:0010605;GO:0010955;GO:0019222;GO:0019538;GO:0030449;GO:…		GO:0005576;GO:0005615;GO:0005886;GO:0016020;GO:0044216;GO:0044217;GO:0044421;GO:0044464;GO:0072562	REACT_118707	19	19	17	43.7	43.7	36.7	67.033	236.36	624700000	545	0.890504	4.12045	2.10984	-1.65637	4.35154	1.57926	3.6901	1.28078	2.98767	0.570199	3.28756	-0.549412	2.50184	1.11802	3.69777	0.928244	2.74115	-1.09392	3.56704	5.63518	3.04595	0.119846	3.15919	2.90085	2.41623	-1.52141	4.75463	1.51362	4.73713
+	7.62595	1.39117	P51884;CON__Q05443	P51884	Lumican	LUM	GO:0000271;GO:0000272;GO:0003008;GO:0005975;GO:0005976;GO:0006022;GO:0006023;GO:0006024;GO:0006026;GO:0006027;GO:0006355;GO:0006357;GO:0006790;GO:0006807;GO:0007600;GO:0007601;GO:0008152;GO:0009056;GO:0009057;GO:0009058;GO:0009059;GO:0009308;GO:0009888;GO:0009889;GO:0009891;GO:0009893;GO:0009987;GO:0010033;GO:0010468;GO:0010556;GO:0010557;GO:0010604;GO:0010628;GO:0014070;GO:0016043;GO:0016051;GO:…	GO:0005198;GO:0005201;GO:0005488;GO:0005515;GO:0005518	GO:0005576;GO:0005578;GO:0005581;GO:0005583;GO:0005615;GO:0005775;GO:0005796;GO:0031012;GO:0031974;GO:0031982;GO:0031988;GO:0043202;GO:0043226;GO:0043227;GO:0043230;GO:0043233;GO:0044420;GO:0044421;GO:0044422;GO:0044424;GO:0044431;GO:0044437;GO:0044444;GO:0044446;GO:0044464;GO:0065010;GO:0070013;GO:0070062	REACT_121120;REACT_121313;REACT_13552;REACT_163906;REACT_268431;REACT_268786	26	26	26	60.4	60.4	60.4	38.429	323.31	6469200000	1502	7.48327	8.61821	6.4832	6.25755	7.25704	6.27466	8.4185	3.43085	6.72191	7.18551	7.0739	4.2856	4.79149	3.85692	5.78319	2.62719	4.68739	3.0906	5.43195	5.57321	7.80557	6.65559	5.95595	4.85323	5.64773	3.16789	5.89682	3.96548	6.67981
+	14.5482	1.38762	P21291	P21291	Cysteine and glycine-rich protein 1	CSRP1	GO:0007155;GO:0009987;GO:0016337;GO:0022610;GO:0034109;GO:0070527	GO:0005488;GO:0008270;GO:0043167;GO:0043169;GO:0046872;GO:0046914	GO:0005634;GO:0005912;GO:0005924;GO:0005925;GO:0030054;GO:0030055;GO:0031982;GO:0031988;GO:0043226;GO:0043227;GO:0043229;GO:0043230;GO:0043231;GO:0044421;GO:0044424;GO:0044464;GO:0065010;GO:0070062;GO:0070161		11	11	10	64.8	64.8	60.1	20.567	323.31	1026000000	1220	3.43957	-0.478687	3.39031	1.37181	3.07334	2.13048	3.52251	0.961843	3.98746	1.20598	3.679	2.50878	1.53884	2.23276	4.46382	2.35876	3.60271	1.6594	3.8083	1.80148	3.82501	1.99873	4.46402	2.27593	4.21008	0.561403	2.74315	2.02372	3.48585
+	7.50949	1.38483	P05543;CON__Q9TT36	P05543	Thyroxine-binding globulin	SERPINA7	GO:0006810;GO:0006865;GO:0007568;GO:0007584;GO:0009605;GO:0009719;GO:0009725;GO:0009791;GO:0009914;GO:0009991;GO:0010033;GO:0010466;GO:0010817;GO:0010951;GO:0015837;GO:0015849;GO:0019222;GO:0031667;GO:0031960;GO:0032502;GO:0033189;GO:0033273;GO:0033993;GO:0034694;GO:0034695;GO:0042221;GO:0042493;GO:0043086;GO:0043434;GO:0044092;GO:0046942;GO:0048545;GO:0050789;GO:0050790;GO:0050896;GO:0051234;GO:…	GO:0004857;GO:0004866;GO:0004867;GO:0005488;GO:0030234;GO:0030414;GO:0042562;GO:0061134;GO:0061135	GO:0005576;GO:0005615;GO:0031982;GO:0031988;GO:0043226;GO:0043227;GO:0043230;GO:0044421;GO:0065010;GO:0070062		12	12	12	43.4	43.4	43.4	46.324	249.03	106410000	473	0.969991	1.62636	0.673586	-0.575752	1.53772	0.664173	2.44714	-0.18123	0.127455	0.296178	1.00275	0.234615	-1.99576	-3.6445	-0.394356	-3.4972	-1.4868	-2.41789	0.491257	2.2199	-0.11005	-0.865997	-0.186228	-0.468127	-0.776649	-4.41755	1.28855	-3.31152	1.68365
+	8.8342	1.38266	Q6YHK3	Q6YHK3	CD109 antigen	CD109	GO:0000768;GO:0001932;GO:0001933;GO:0001942;GO:0006949;GO:0008285;GO:0008544;GO:0009888;GO:0009892;GO:0009966;GO:0009968;GO:0009987;GO:0010563;GO:0010605;GO:0010646;GO:0010648;GO:0010837;GO:0010839;GO:0017015;GO:0019220;GO:0019222;GO:0022404;GO:0022405;GO:0023051;GO:0023057;GO:0030512;GO:0030856;GO:0031323;GO:0031324;GO:0031399;GO:0031400;GO:0032101;GO:0032102;GO:0032268;GO:0032269;GO:0032501;GO:…	GO:0004857;GO:0004866;GO:0004867;GO:0005488;GO:0005515;GO:0019838;GO:0019955;GO:0030234;GO:0030414;GO:0050431;GO:0061134;GO:0061135	GO:0005615;GO:0005886;GO:0009986;GO:0016020;GO:0031224;GO:0031225;GO:0044421;GO:0044425;GO:0044464		32	32	32	29.7	29.7	29.7	161.69	323.31	228360000	483	2.13977	2.66126	1.54093	-1.57124	0.438412	-0.822132	1.28118	2.20452	0.783249	-2.47429	1.74407	1.06054	-0.482386	0.718229	2.56717	-0.344919	1.9642	2.03811	2.36594	0.352145	-0.844246	-0.427256	1.31615	-1.53276	1.70889	0.907097	1.1567	0.715448	1.62568
+	9.22315	1.3766	P68871	P68871	Hemoglobin subunit beta;LVV-hemorphin-7;Spinorphin	HBB	GO:0000302;GO:0003008;GO:0003013;GO:0003014;GO:0003018;GO:0006461;GO:0006810;GO:0006811;GO:0006820;GO:0006897;GO:0006898;GO:0006950;GO:0006979;GO:0007155;GO:0007596;GO:0007599;GO:0008152;GO:0008217;GO:0009056;GO:0009889;GO:0009891;GO:0009893;GO:0009987;GO:0010035;GO:0010324;GO:0010941;GO:0010942;GO:0015669;GO:0015671;GO:0015698;GO:0015701;GO:0015711;GO:0016043;GO:0016044;GO:0016192;GO:0016337;GO:…	GO:0005215;GO:0005344;GO:0005488;GO:0005506;GO:0005515;GO:0019825;GO:0020037;GO:0022892;GO:0030492;GO:0043167;GO:0043169;GO:0046872;GO:0046906;GO:0046914	GO:0005576;GO:0005829;GO:0005833;GO:0031838;GO:0031974;GO:0031982;GO:0031983;GO:0031988;GO:0032991;GO:0043226;GO:0043227;GO:0043230;GO:0043233;GO:0043234;GO:0044421;GO:0044422;GO:0044424;GO:0044433;GO:0044444;GO:0044445;GO:0044446;GO:0044464;GO:0060205;GO:0065010;GO:0070062;GO:0071682;GO:0072562	REACT_121329;REACT_121380;REACT_160163;REACT_24970	34	34	22	100	100	96.6	15.998	323.31	133020000000	13830	9.11751	10.1096	9.09829	10.1202	10.686	9.33343	10.7467	8.83021	10.7186	8.79878	9.79096	8.7622	7.39755	6.27816	10.1177	7.22719	7.75625	7.03774	10.3651	11.4669	10.1587	9.35557	8.6419	9.37027	9.303	5.65929	9.77904	7.62221	9.35632
+	6.76813	1.37164	Q8NHV1	Q8NHV1	GTPase IMAP family member 7	GIMAP7	GO:0008152	GO:0000166;GO:0003824;GO:0003924;GO:0005488;GO:0005515;GO:0005525;GO:0016462;GO:0016787;GO:0016817;GO:0016818;GO:0017076;GO:0017111;GO:0019001;GO:0032553;GO:0032555;GO:0032561;GO:0035639;GO:0042802;GO:0042803;GO:0046983	GO:0005737;GO:0005811;GO:0044424;GO:0044444;GO:0044464		3	3	3	17	17	17	34.508	33.317	21468000	53	-0.92237	-0.307535	0.30652	-5.19874	-0.152294	-1.45864	-1.40559	-2.20856	-1.45708	-2.85385	-0.820427	-0.0844421	0.193361	-1.95157	-2.15654	0.447304	-0.989733	-2.27318	-0.884542	-4.20651	-4.10269	-3.79673	-3.86131	-1.26657	-0.8334	-3.25101	-4.19521	-3.58152	-0.95182
+	4.09454	1.37126	P14780	P14780	Matrix metalloproteinase-9;67 kDa matrix metalloproteinase-9;82 kDa matrix metalloproteinase-9	MMP9	GO:0001501;GO:0001503;GO:0001932;GO:0001934;GO:0002376;GO:0002521;GO:0002573;GO:0006508;GO:0006928;GO:0006935;GO:0007165;GO:0007166;GO:0007167;GO:0007169;GO:0007411;GO:0007566;GO:0008152;GO:0009605;GO:0009893;GO:0009966;GO:0009967;GO:0009987;GO:0010562;GO:0010604;GO:0010638;GO:0010646;GO:0010647;GO:0010821;GO:0010822;GO:0010941;GO:0016043;GO:0016477;GO:0019220;GO:0019222;GO:0019538;GO:0022411;GO:…	GO:0003824;GO:0004175;GO:0004222;GO:0005488;GO:0005515;GO:0005518;GO:0008233;GO:0008237;GO:0008270;GO:0016787;GO:0042802;GO:0043167;GO:0043169;GO:0046872;GO:0046914;GO:0070011	GO:0005576;GO:0005578;GO:0005615;GO:0031012;GO:0031982;GO:0031988;GO:0043226;GO:0043227;GO:0043230;GO:0044421;GO:0065010;GO:0070062	REACT_111040;REACT_118572;REACT_118682;REACT_150180;REACT_150401;REACT_264198	16	16	15	30.4	30.4	29.3	78.457	75.357	142220000	353	-0.666501	1.37668	1.19509	-3.2812	0.737425	-2.39605	0.286341	0.51201	-0.978058	-2.35172	0.337915	1.52432	2.87216	-0.0888214	1.76068	0.721636	-1.48481	-0.078043	1.72193	1.05047	-2.83385	-3.18569	-0.274778	-1.46061	0.373073	-5.54433	-0.242364	1.10586	1.62946
+	3.87841	1.37082	Q9UMS6	Q9UMS6	Synaptopodin-2	SYNPO2		GO:0005488;GO:0005515;GO:0008092;GO:0042805;GO:0051371;GO:0051393;GO:0071889	GO:0005634;GO:0005856;GO:0005912;GO:0005924;GO:0005925;GO:0015629;GO:0030018;GO:0030054;GO:0030055;GO:0043226;GO:0043227;GO:0043228;GO:0043229;GO:0043231;GO:0043232;GO:0044422;GO:0044424;GO:0044444;GO:0044449;GO:0044464;GO:0070161		22	22	20	28.2	28.2	25.5	117.51	117.75	197110000	275	-0.188766	1.74559	2.12544	5.46312	5.1784	-1.05691	0.68363	-0.535363	0.619394	-0.0331755	0.439304	-0.0180779	-0.984856	-2.35355	0.794827	-0.709263	2.53649	-1.59569	0.727209	-2.77938	0.56884	-1.20457	3.96852	-1.56869	2.91437	-2.91047	-1.85135	0.848259	1.69268
+	9.22253	1.3696	Q9UJC5	Q9UJC5	SH3 domain-binding glutamic acid-rich-like protein 2	SH3BGRL2			GO:0005654;GO:0031982;GO:0031988;GO:0043226;GO:0043227;GO:0043230;GO:0044421;GO:0044422;GO:0044424;GO:0044428;GO:0044446;GO:0044464;GO:0065010;GO:0070062		4	4	4	57	57	57	12.326	55.731	42567000	213	0.387776	-2.26195	0.00248528	-1.51227	0.264969	-1.57713	0.440464	-3.51532	-0.934896	-0.121892	0.263727	-2.61276	-1.41072	-3.69508	0.410269	-1.53088	-1.36778	-2.15782	0.0237083	-1.56466	-1.55383	-2.43817	-1.42406	-3.38712	-0.0181742	-1.27416	-0.463981	-3.05791	0.00149918
+	6.32028	1.36924	Q02318	Q02318	Sterol 26-hydroxylase, mitochondrial	CYP27A1	GO:0006066;GO:0006082;GO:0006629;GO:0006694;GO:0006699;GO:0006805;GO:0008152;GO:0008202;GO:0008203;GO:0008206;GO:0008610;GO:0009058;GO:0009987;GO:0016053;GO:0016125;GO:0019752;GO:0032787;GO:0042180;GO:0043436;GO:0044237;GO:0044238;GO:0044249;GO:0044281;GO:0044283;GO:0046394	GO:0003824;GO:0004497;GO:0005488;GO:0005506;GO:0008395;GO:0016491;GO:0016705;GO:0016709;GO:0020037;GO:0030343;GO:0031073;GO:0043167;GO:0043169;GO:0046872;GO:0046906;GO:0046914;GO:0047749;GO:0070643	GO:0005743;GO:0005759;GO:0016020;GO:0019866;GO:0031090;GO:0031966;GO:0031974;GO:0043233;GO:0044422;GO:0044424;GO:0044429;GO:0044444;GO:0044446;GO:0044464;GO:0070013	REACT_11041;REACT_11048;REACT_11053;REACT_13812;REACT_268413	18	18	18	48.4	48.4	48.4	60.234	193.19	206590000	454	-1.2499	-1.10736	0.189951	-3.34863	-1.21006	-2.49087	0.404642	-3.57555	-0.71526	-3.92251	-0.402388	-1.88912	0.643812	-3.0922	-0.439938	0.386858	1.45902	1.12004	1.53658	-1.64316	-0.396486	-0.686846	1.07102	0.758891	1.95471	-4.57458	1.95981	-0.279583	-0.515644
+	4.13687	1.36516	P02656	P02656	Apolipoprotein C-III	APOC3	GO:0001523;GO:0001678;GO:0006066;GO:0006629;GO:0006638;GO:0006639;GO:0006641;GO:0006642;GO:0006662;GO:0006720;GO:0006721;GO:0006810;GO:0006869;GO:0006950;GO:0006952;GO:0006954;GO:0007165;GO:0007166;GO:0007186;GO:0007584;GO:0007602;GO:0007603;GO:0008152;GO:0008202;GO:0008203;GO:0009056;GO:0009314;GO:0009416;GO:0009581;GO:0009582;GO:0009583;GO:0009584;GO:0009605;GO:0009611;GO:0009628;GO:0009719;GO:…	GO:0004857;GO:0005102;GO:0005488;GO:0005496;GO:0005515;GO:0005543;GO:0008289;GO:0015485;GO:0030234;GO:0032934;GO:0055102;GO:0070325;GO:0070653	GO:0005576;GO:0005615;GO:0005768;GO:0005769;GO:0031982;GO:0031988;GO:0032991;GO:0032994;GO:0034358;GO:0034361;GO:0034363;GO:0034364;GO:0034366;GO:0034385;GO:0042627;GO:0043226;GO:0043227;GO:0043229;GO:0043230;GO:0043231;GO:0044421;GO:0044424;GO:0044444;GO:0044464;GO:0065010;GO:0070062	REACT_13621;REACT_24968;REACT_6841	8	8	8	58.6	58.6	58.6	10.852	287.29	1000600000	542	4.86442	5.63648	5.30043	5.98117	7.15239	5.81453	6.42133	3.91397	5.50498	4.85425	6.03444	3.89219	3.50957	2.30517	5.0925	2.42193	3.20783	0.737375	6.06239	7.42746	2.57024	4.18019	4.88101	2.57199	4.37811	0.71784	5.43647	3.24843	5.30153
+	4.88658	1.36124	Q13361	Q13361	Microfibrillar-associated protein 5	MFAP5	GO:0009987;GO:0016043;GO:0030097;GO:0030198;GO:0032502;GO:0043062;GO:0043206;GO:0048513;GO:0048534;GO:0048856;GO:0060216;GO:0071840;GO:0071841;GO:0071842	GO:0005198;GO:0005201	GO:0001527;GO:0005576;GO:0043205;GO:0044420;GO:0044421	REACT_150331;REACT_150366	4	4	4	20.8	20.8	20.8	19.611	11.414	31129000	105	-0.857247	-1.29532	1.42938	-1.8311	1.18226	-2.94138	-1.21956	-3.61943	-1.14478	-1.41073	1.88789	-4.04912	-2.54773	-2.20696	-0.961031	-4.95596	-5.78293	-3.10196	-1.55106	-0.501821	2.43774	-4.37	-0.0778637	-5.48316	-1.9414	-3.77987	-3.81094	-3.77926	-1.18864
+	11.4126	1.36015	P00751;CON__Q3KUS7	P00751	Complement factor B;Complement factor B Ba fragment;Complement factor B Bb fragment	CFB	GO:0002252;GO:0002253;GO:0002376;GO:0002673;GO:0002682;GO:0002684;GO:0002697;GO:0002920;GO:0006950;GO:0006952;GO:0006955;GO:0006956;GO:0006957;GO:0006959;GO:0008152;GO:0010468;GO:0019222;GO:0019538;GO:0030449;GO:0031347;GO:0032101;GO:0043170;GO:0044238;GO:0045087;GO:0048518;GO:0048583;GO:0048584;GO:0050727;GO:0050776;GO:0050778;GO:0050789;GO:0050896;GO:0051246;GO:0060255;GO:0065007;GO:0070613;GO:…	GO:0001848;GO:0003824;GO:0004175;GO:0004252;GO:0005488;GO:0005515;GO:0008233;GO:0008236;GO:0016787;GO:0017171;GO:0070011	GO:0005576;GO:0005615;GO:0005886;GO:0016020;GO:0031982;GO:0031988;GO:0043226;GO:0043227;GO:0043230;GO:0044421;GO:0044464;GO:0065010;GO:0070062;GO:0072562	REACT_118707;REACT_7972;REACT_8001	48	48	46	60.1	60.1	55.9	85.532	323.31	1774000000	2341	2.45314	2.70504	3.33552	0.880405	4.20214	2.01034	4.51345	1.70062	3.76315	1.02549	4.23372	2.65475	2.51266	1.22298	3.57938	1.2962	2.85372	1.22214	3.99492	5.58825	3.87329	0.99296	3.31198	1.85737	2.86835	-0.950472	4.11996	1.81017	4.41893
+	25.2503	1.35752	Q13813	Q13813	Spectrin alpha chain, non-erythrocytic 1	SPTAN1	GO:0006915;GO:0006921;GO:0006935;GO:0007411;GO:0008064;GO:0008219;GO:0009605;GO:0009987;GO:0010639;GO:0012501;GO:0016043;GO:0016265;GO:0022411;GO:0030832;GO:0030833;GO:0030834;GO:0030835;GO:0030837;GO:0031333;GO:0032271;GO:0032272;GO:0032535;GO:0032956;GO:0032970;GO:0033043;GO:0040011;GO:0042221;GO:0042330;GO:0043242;GO:0043244;GO:0043254;GO:0044087;GO:0048519;GO:0048523;GO:0050789;GO:0050794;GO:…	GO:0003779;GO:0005198;GO:0005200;GO:0005488;GO:0005509;GO:0005515;GO:0008092;GO:0043167;GO:0043169;GO:0046872	GO:0005829;GO:0005856;GO:0005911;GO:0005912;GO:0005913;GO:0005916;GO:0008091;GO:0015630;GO:0016020;GO:0016328;GO:0030018;GO:0030054;GO:0031982;GO:0031988;GO:0032437;GO:0043226;GO:0043227;GO:0043228;GO:0043229;GO:0043230;GO:0043231;GO:0043232;GO:0044421;GO:0044422;GO:0044424;GO:0044425;GO:0044430;GO:0044444;GO:0044446;GO:0044448;GO:0044449;GO:0044459;GO:0044464;GO:0065010;GO:0070062;GO:0070161	REACT_13541;REACT_18334;REACT_22266;REACT_23832	237	237	234	83	83	81.5	284.54	323.31	8168300000	15361	4.50321	2.0103	3.90334	4.05859	3.66054	3.01377	3.77503	2.99451	4.34496	2.48928	4.40435	2.7652	2.18254	1.91998	4.31843	2.54818	3.77232	1.8296	3.71384	1.17014	4.87984	3.40674	3.58244	2.88456	3.68842	1.43405	3.66726	1.23044	4.05896
+	3.32931	1.35618	P19652	P19652	Alpha-1-acid glycoprotein 2	ORM2	GO:0002526;GO:0002682;GO:0006810;GO:0006950;GO:0006952;GO:0006953;GO:0006954;GO:0009611;GO:0050789;GO:0050896;GO:0051234;GO:0065007		GO:0005615;GO:0031982;GO:0031988;GO:0043226;GO:0043227;GO:0043230;GO:0044421;GO:0065010;GO:0070062;GO:0072562		16	9	9	67.2	41.8	41.8	23.602	281.14	352680000	489	-0.708938	-1.1476	0.230175	-1.29369	2.0635	-0.829748	1.78905	-1.0423	2.15157	0.419394	1.30382	-2.28383	0.071434	-2.78938	1.27566	-1.7772	-2.26844	-4.61335	0.306141	2.9634	0.766163	-0.347582	0.0974712	-1.51207	-0.172664	-3.80443	1.52478	2.25665	0.609478
+	9.17152	1.34953	P09668	P09668	Pro-cathepsin H;Cathepsin H mini chain;Cathepsin H;Cathepsin H heavy chain;Cathepsin H light chain	CTSH	GO:0000165;GO:0001656;GO:0001822;GO:0001894;GO:0001906;GO:0001909;GO:0001913;GO:0002009;GO:0002250;GO:0002252;GO:0002376;GO:0002443;GO:0002449;GO:0002456;GO:0002460;GO:0002682;GO:0002764;GO:0006508;GO:0006518;GO:0006917;GO:0006955;GO:0007165;GO:0007243;GO:0007276;GO:0007283;GO:0007584;GO:0008152;GO:0008284;GO:0009056;GO:0009605;GO:0009653;GO:0009719;GO:0009725;GO:0009893;GO:0009987;GO:0009991;GO:…	GO:0003824;GO:0004175;GO:0004177;GO:0004197;GO:0004252;GO:0004871;GO:0004872;GO:0004888;GO:0005488;GO:0008047;GO:0008233;GO:0008234;GO:0008236;GO:0008238;GO:0008656;GO:0016504;GO:0016505;GO:0016787;GO:0017171;GO:0030108;GO:0030234;GO:0032393;GO:0032397;GO:0038023;GO:0042562;GO:0043028;GO:0060089;GO:0061134;GO:0070011;GO:0070324	GO:0000323;GO:0001520;GO:0001669;GO:0005615;GO:0005764;GO:0005773;GO:0005829;GO:0016023;GO:0030141;GO:0031410;GO:0031982;GO:0031988;GO:0043226;GO:0043227;GO:0043229;GO:0043230;GO:0043231;GO:0044421;GO:0044422;GO:0044424;GO:0044444;GO:0044447;GO:0044463;GO:0044464;GO:0065010;GO:0070062	REACT_121399	14	14	12	53.7	53.7	45.1	37.393	183.37	738600000	748	3.93417	0.742258	3.08304	4.36653	3.33461	3.23714	4.32176	1.07051	3.89088	1.51753	3.94396	2.03246	3.36082	-0.429756	1.73275	0.91592	4.50888	0.851397	3.23343	1.1803	1.26285	4.30446	4.29002	3.95703	4.02073	-0.119293	4.1395	0.784464	2.1553
+	6.37753	1.34925	Q9NZR1	Q9NZR1	Tropomodulin-2	TMOD2	GO:0003008;GO:0003012;GO:0006936;GO:0006996;GO:0007010;GO:0007015;GO:0007154;GO:0007267;GO:0007268;GO:0007270;GO:0007399;GO:0007610;GO:0007611;GO:0008064;GO:0008277;GO:0009966;GO:0009967;GO:0009987;GO:0010639;GO:0010646;GO:0010647;GO:0010927;GO:0016043;GO:0022607;GO:0023051;GO:0023052;GO:0023056;GO:0030029;GO:0030036;GO:0030239;GO:0030832;GO:0030833;GO:0030834;GO:0030835;GO:0030837;GO:0031032;GO:…	GO:0005488;GO:0005515;GO:0005523;GO:0008092	GO:0005865;GO:0030426;GO:0030427;GO:0044422;GO:0044424;GO:0044430;GO:0044444;GO:0044446;GO:0044449;GO:0044463;GO:0044464		10	9	9	40.7	38.2	38.2	39.595	104.64	43895000	131	1.15703	-2.89346	0.702753	-1.15748	1.1221	-0.363201	-0.388441	-1.8438	1.01797	0.865672	1.04832	-1.7493	-1.27078	-2.31219	-0.610472	-2.42925	-0.42975	-2.09087	-1.30927	-4.22883	1.10028	0.160097	0.0171642	-2.58503	-0.17315	-2.96008	-1.03978	-5.16594	-0.425447
+	13.2265	1.34675	Q6WCQ1	Q6WCQ1	Myosin phosphatase Rho-interacting protein	MPRIP			GO:0005737;GO:0005856;GO:0005912;GO:0005924;GO:0005925;GO:0015629;GO:0030054;GO:0030055;GO:0043226;GO:0043228;GO:0043229;GO:0043232;GO:0044424;GO:0044464;GO:0070161		37	37	36	47.5	47.5	46.6	116.53	256.27	285030000	973	1.5306	-1.43712	1.07238	0.370544	0.421532	-0.125885	0.860321	-1.43067	1.28522	-0.971641	1.09072	0.0384789	-0.644005	-0.587036	1.83492	0.16115	1.36886	-1.48282	1.40864	-0.285823	2.46843	0.190466	1.65129	0.71757	1.40242	-2.44771	0.878018	-1.12948	1.65128
+	13.4539	1.32988	P39060	P39060	Collagen alpha-1(XVIII) chain;Endostatin	COL18A1	GO:0000902;GO:0000904;GO:0001525;GO:0001886;GO:0003008;GO:0003382;GO:0006950;GO:0007155;GO:0007600;GO:0007601;GO:0008152;GO:0008284;GO:0008285;GO:0009415;GO:0009628;GO:0009653;GO:0009887;GO:0009987;GO:0010941;GO:0010942;GO:0016043;GO:0022411;GO:0022610;GO:0022617;GO:0030198;GO:0030334;GO:0030335;GO:0030574;GO:0032501;GO:0032502;GO:0032879;GO:0032963;GO:0032989;GO:0040012;GO:0040017;GO:0042127;GO:…	GO:0005198;GO:0005488;GO:0005515;GO:0042802;GO:0043167;GO:0043169;GO:0046872	GO:0005576;GO:0005581;GO:0005604;GO:0005615;GO:0005788;GO:0031012;GO:0031974;GO:0031982;GO:0031988;GO:0043226;GO:0043227;GO:0043230;GO:0043233;GO:0044420;GO:0044421;GO:0044422;GO:0044424;GO:0044432;GO:0044444;GO:0044446;GO:0044464;GO:0065010;GO:0070013;GO:0070062	REACT_118682;REACT_121139;REACT_13552;REACT_150180;REACT_150401;REACT_169262	17	17	17	14.2	14.2	14.2	178.19	323.31	626230000	1000	4.2342	3.67374	2.47134	1.82443	1.95268	1.51816	3.16485	0.685094	2.45315	1.26506	3.34176	0.873081	0.760258	0.243904	2.98972	1.53058	3.02034	1.39807	3.00701	2.94881	2.95217	2.26672	2.88458	1.35718	3.29021	-0.842802	2.16884	0.720272	2.96717
+	7.17384	1.32314	P63096	P63096	Guanine nucleotide-binding protein G(i) subunit alpha-1	GNAI1	GO:0001775;GO:0006140;GO:0007049;GO:0007154;GO:0007165;GO:0007166;GO:0007186;GO:0007187;GO:0007188;GO:0007193;GO:0007194;GO:0007267;GO:0007268;GO:0007596;GO:0007599;GO:0008152;GO:0009719;GO:0009725;GO:0009889;GO:0009987;GO:0010033;GO:0019219;GO:0019222;GO:0019932;GO:0019933;GO:0019935;GO:0023052;GO:0030168;GO:0030799;GO:0030802;GO:0030808;GO:0030814;GO:0030817;GO:0031279;GO:0031280;GO:0031323;GO:…	GO:0000166;GO:0001664;GO:0003824;GO:0003924;GO:0004871;GO:0005102;GO:0005488;GO:0005515;GO:0005525;GO:0016462;GO:0016787;GO:0016817;GO:0016818;GO:0017076;GO:0017111;GO:0019001;GO:0031683;GO:0031821;GO:0032403;GO:0032553;GO:0032555;GO:0032561;GO:0035639;GO:0043167;GO:0043169;GO:0046872;GO:0060089	GO:0005634;GO:0005737;GO:0005765;GO:0005774;GO:0005813;GO:0005815;GO:0005834;GO:0005886;GO:0016020;GO:0019897;GO:0019898;GO:0030496;GO:0031090;GO:0031234;GO:0031982;GO:0031988;GO:0032991;GO:0043226;GO:0043227;GO:0043228;GO:0043229;GO:0043230;GO:0043231;GO:0043232;GO:0043234;GO:0044421;GO:0044422;GO:0044424;GO:0044425;GO:0044430;GO:0044437;GO:0044444;GO:0044446;GO:0044459;GO:0044464;GO:0065010;GO:…	REACT_15333;REACT_15426;REACT_15457;REACT_18325;REACT_18339;REACT_19231;REACT_19327;REACT_19333;REACT_20653	17	7	7	47.7	25.4	25.4	40.361	92.259	57929000	225	0.583486	0.173771	0.0379257	-1.86933	-0.229452	-1.33471	0.082262	-0.169168	-0.491102	-2.40129	0.21664	-1.65793	-1.135	-0.509398	1.09522	-1.10401	0.770622	-0.654228	1.28487	-0.595035	-4.83653	-1.23901	-0.746124	-1.24675	0.988614	0.0544453	0.0568972	-1.47078	0.805368
+	2.43587	1.31638	Q9Y6R0	Q9Y6R0	Numb-like protein	NUMBL	GO:0007165;GO:0007166;GO:0007399;GO:0007409;GO:0008152;GO:0009653;GO:0009987;GO:0010033;GO:0010720;GO:0010769;GO:0010975;GO:0016043;GO:0017145;GO:0019221;GO:0019538;GO:0021670;GO:0021849;GO:0021873;GO:0022603;GO:0022604;GO:0030030;GO:0031344;GO:0031346;GO:0032502;GO:0032989;GO:0032990;GO:0034097;GO:0034330;GO:0034332;GO:0042221;GO:0043170;GO:0044238;GO:0045216;GO:0045595;GO:0045597;GO:0045664;GO:…		GO:0005737;GO:0044424;GO:0044464		2	2	2	5.1	5.1	5.1	64.891	1.763	53545000	36	-3.02597	1.97579	1.43691	2.14846	1.69395	1.21277	2.00657	1.03621	1.60832	1.29225	1.90364	-3.56114	-4.31203	-4.18818	1.59172	0.256065	-4.2606	0.488987	1.82546	-4.658	-5.04556	-3.45898	-3.23897	-3.2762	1.47185	-1.09675	-4.36743	-4.18032	1.47277
+	10.8717	1.31547	P13716	P13716	Delta-aminolevulinic acid dehydratase	ALAD	GO:0006461;GO:0006725;GO:0006778;GO:0006779;GO:0006782;GO:0006783;GO:0006807;GO:0008152;GO:0009058;GO:0009987;GO:0010033;GO:0016043;GO:0018130;GO:0022607;GO:0033013;GO:0033014;GO:0034097;GO:0034641;GO:0042168;GO:0042221;GO:0042440;GO:0043933;GO:0044237;GO:0044249;GO:0044271;GO:0044281;GO:0046148;GO:0046483;GO:0046501;GO:0050896;GO:0051186;GO:0051188;GO:0051259;GO:0051260;GO:0051716;GO:0065003;GO:…	GO:0003824;GO:0004655;GO:0005488;GO:0005515;GO:0008270;GO:0016829;GO:0016835;GO:0016836;GO:0032791;GO:0042802;GO:0043167;GO:0043169;GO:0046872;GO:0046914	GO:0005634;GO:0005829;GO:0031982;GO:0031988;GO:0043226;GO:0043227;GO:0043229;GO:0043230;GO:0043231;GO:0044421;GO:0044424;GO:0044444;GO:0044464;GO:0065010;GO:0070062	REACT_9465	18	18	15	61.2	61.2	53.6	36.294	323.31	409040000	927	1.59016	2.37626	1.80096	0.654276	3.16181	1.56892	2.97248	1.55786	3.20974	1.176	2.51982	1.52267	1.35382	-0.368994	3.02307	0.604284	1.04358	-0.111385	3.0381	4.25211	2.58448	0.592163	1.41387	1.29394	1.90704	-0.955843	2.90632	0.413723	1.98678
+	7.17048	1.31434	Q8NF91	Q8NF91	Nesprin-1	SYNE1	GO:0006996;GO:0006997;GO:0007010;GO:0007030;GO:0009987;GO:0016043;GO:0030154;GO:0032502;GO:0032507;GO:0040023;GO:0042692;GO:0043578;GO:0045185;GO:0048869;GO:0051234;GO:0051235;GO:0051457;GO:0051649;GO:0051651;GO:0051656;GO:0065007;GO:0065008;GO:0071840;GO:0071841;GO:0071842;GO:0072595;GO:0090286;GO:0090292	GO:0003779;GO:0005488;GO:0005515;GO:0005521;GO:0008092;GO:0042802;GO:0042803;GO:0046983;GO:0051015	GO:0005634;GO:0005635;GO:0005640;GO:0005654;GO:0005737;GO:0005794;GO:0005856;GO:0016020;GO:0016021;GO:0019867;GO:0030017;GO:0031090;GO:0031224;GO:0031965;GO:0031967;GO:0031968;GO:0031975;GO:0032991;GO:0034993;GO:0043226;GO:0043227;GO:0043228;GO:0043229;GO:0043231;GO:0043232;GO:0043234;GO:0044422;GO:0044424;GO:0044425;GO:0044428;GO:0044444;GO:0044446;GO:0044449;GO:0044456;GO:0044464;GO:0045211;GO:…	REACT_75792	96	94	91	16.4	16.2	15.6	1011.1	323.31	472580000	539	2.23162	1.01367	2.88136	0.847191	1.51956	1.36125	1.68477	0.30251	2.34052	-0.213248	2.26156	1.34818	1.83308	0.0792255	3.60093	1.35386	3.53614	0.242256	1.78855	2.04904	3.71891	1.17756	3.69499	1.54295	2.95762	-0.895109	0.184983	1.27389	3.78197
+	14.7525	1.31043	Q9BUT1	Q9BUT1	3-hydroxybutyrate dehydrogenase type 2	BDH2	GO:0006082;GO:0006518;GO:0006629;GO:0006631;GO:0006635;GO:0006778;GO:0006807;GO:0008152;GO:0009056;GO:0009058;GO:0009062;GO:0009237;GO:0009987;GO:0016042;GO:0016054;GO:0019184;GO:0019290;GO:0019395;GO:0019752;GO:0030154;GO:0030258;GO:0030855;GO:0032502;GO:0032787;GO:0033013;GO:0034440;GO:0042168;GO:0042180;GO:0042440;GO:0042592;GO:0043043;GO:0043436;GO:0044237;GO:0044238;GO:0044242;GO:0044248;GO:…	GO:0000166;GO:0003824;GO:0003858;GO:0005488;GO:0016491;GO:0016614;GO:0016616;GO:0016627;GO:0016628;GO:0048037;GO:0050662;GO:0051287	GO:0005737;GO:0031982;GO:0031988;GO:0043226;GO:0043227;GO:0043230;GO:0044421;GO:0044424;GO:0044464;GO:0065010;GO:0070062		7	7	7	33.5	33.5	33.5	26.724	87.374	99740000	394	0.115708	-1.3166	0.448021	-2.67282	0.391813	-1.18167	0.747606	-2.69958	-0.0133419	-3.41845	0.345385	-0.823959	0.252653	-0.757668	0.579309	-0.288916	0.866095	-0.279812	1.01335	-0.921412	-1.79743	-2.55304	0.712034	0.356971	0.766786	-2.81333	0.499703	-0.970087	1.20411
+	9.64019	1.30912	Q9UGP4	Q9UGP4	LIM domain-containing protein 1	LIMD1	GO:0001666;GO:0002076;GO:0006139;GO:0006351;GO:0006355;GO:0006793;GO:0006796;GO:0006807;GO:0006928;GO:0006950;GO:0006996;GO:0007010;GO:0007165;GO:0007275;GO:0008152;GO:0008360;GO:0009058;GO:0009059;GO:0009889;GO:0009890;GO:0009892;GO:0009966;GO:0009968;GO:0009987;GO:0010468;GO:0010556;GO:0010558;GO:0010605;GO:0010608;GO:0010629;GO:0010646;GO:0010648;GO:0016043;GO:0016070;GO:0016310;GO:0016441;GO:…	GO:0000988;GO:0000989;GO:0003712;GO:0003714;GO:0005488;GO:0008270;GO:0043167;GO:0043169;GO:0046872;GO:0046914	GO:0000932;GO:0005634;GO:0005737;GO:0005912;GO:0005924;GO:0005925;GO:0016442;GO:0030054;GO:0030055;GO:0030529;GO:0031332;GO:0032991;GO:0035770;GO:0043226;GO:0043227;GO:0043228;GO:0043229;GO:0043231;GO:0043232;GO:0044424;GO:0044444;GO:0044464;GO:0070161		8	8	8	20.1	20.1	20.1	72.189	64.212	38015000	203	-0.188766	-1.76038	-0.771305	-0.945871	-0.33217	-0.576336	0.168217	-4.40109	-2.32773	-0.828851	-1.28785	-2.30013	-0.906563	-2.23092	-1.80457	-1.04524	0.0170059	-2.98986	-0.353354	-3.82924	0.0310307	-1.55043	0.491859	-1.49094	-1.63876	-3.32106	-1.84777	-3.53613	-0.273811
+	4.57912	1.30876	Q8N2S1	Q8N2S1	Latent-transforming growth factor beta-binding protein 4	LTBP4	GO:0001558;GO:0002790;GO:0006457;GO:0006810;GO:0007165;GO:0007166;GO:0007167;GO:0007178;GO:0007179;GO:0007275;GO:0008152;GO:0009914;GO:0009966;GO:0009987;GO:0010817;GO:0015833;GO:0016043;GO:0017015;GO:0019222;GO:0019538;GO:0023051;GO:0023061;GO:0030072;GO:0030162;GO:0030198;GO:0030252;GO:0032501;GO:0032502;GO:0032940;GO:0040008;GO:0043062;GO:0043170;GO:0044237;GO:0044238;GO:0044260;GO:0044267;GO:…	GO:0001871;GO:0003824;GO:0004672;GO:0004674;GO:0004675;GO:0004871;GO:0004872;GO:0004888;GO:0005024;GO:0005102;GO:0005178;GO:0005488;GO:0005509;GO:0005515;GO:0005539;GO:0016301;GO:0016740;GO:0016772;GO:0016773;GO:0019199;GO:0019838;GO:0019955;GO:0030246;GO:0030247;GO:0032403;GO:0038023;GO:0043167;GO:0043169;GO:0046872;GO:0050431;GO:0060089	GO:0005576;GO:0005578;GO:0005615;GO:0031012;GO:0031982;GO:0031988;GO:0043226;GO:0043227;GO:0043230;GO:0044421;GO:0065010;GO:0070062	REACT_150331	16	16	8	14.1	14.1	6.5	173.43	16.768	92139000	140	2.01648	-1.52516	1.04321	2.29601	-2.16902	-1.0033	1.66521	-0.231269	-0.479382	-1.24421	1.92636	0.926758	-3.21573	-0.185907	-0.513847	-2.30525	-1.27825	-2.57796	0.186581	-3.72192	-0.343687	-1.65221	-0.153133	-3.08747	-1.24065	-2.64815	-0.390132	-3.34561	1.97039
+	6.48278	1.3081	Q16777;Q6FI13	Q16777;Q6FI13	Histone H2A type 2-C;Histone H2A type 2-A	HIST2H2AC;HIST2H2AA3		GO:0003676;GO:0003677;GO:0005488	GO:0000786;GO:0005634;GO:0031982;GO:0031988;GO:0032991;GO:0032993;GO:0043226;GO:0043227;GO:0043229;GO:0043230;GO:0043231;GO:0044421;GO:0044422;GO:0044424;GO:0044427;GO:0044446;GO:0044464;GO:0065010;GO:0070062	REACT_169168;REACT_169185;REACT_169436;REACT_2204;REACT_22186;REACT_2232;REACT_263923;REACT_263965;REACT_264242;REACT_264245;REACT_264303;REACT_264352;REACT_264541;REACT_264545;REACT_268237;REACT_268530;REACT_27271;REACT_355391;REACT_75792;REACT_75925;REACT_7963	11	3	2	65.9	29.5	24.8	13.988	169.68	939720000	374	3.1189	3.75957	3.56081	3.0102	3.6145	2.76399	3.02783	3.10396	3.35465	2.44556	3.9535	-1.03885	3.10544	3.21758	5.03164	3.0176	5.10542	4.28253	4.6643	-3.59291	2.143	0.73077	4.40883	4.14699	5.20107	2.32567	4.51533	4.54589	5.46731
+	8.95324	1.3066	P34913	P34913	Bifunctional epoxide hydrolase 2;Cytosolic epoxide hydrolase 2;Lipid-phosphate phosphatase	EPHX2	GO:0000038;GO:0006082;GO:0006083;GO:0006629;GO:0006631;GO:0006690;GO:0006725;GO:0006793;GO:0006796;GO:0006805;GO:0006873;GO:0006874;GO:0006875;GO:0006950;GO:0006952;GO:0006954;GO:0008152;GO:0008217;GO:0009056;GO:0009611;GO:0009636;GO:0009698;GO:0009810;GO:0009893;GO:0009987;GO:0010468;GO:0010604;GO:0010628;GO:0016054;GO:0016311;GO:0017144;GO:0019216;GO:0019218;GO:0019222;GO:0019369;GO:0019373;GO:…	GO:0000287;GO:0003824;GO:0004301;GO:0005102;GO:0005488;GO:0005515;GO:0015643;GO:0016787;GO:0016788;GO:0016791;GO:0016801;GO:0016803;GO:0033885;GO:0042577;GO:0042578;GO:0042802;GO:0042803;GO:0043167;GO:0043169;GO:0046872;GO:0046983	GO:0005737;GO:0005777;GO:0005829;GO:0031982;GO:0031988;GO:0042579;GO:0043226;GO:0043227;GO:0043229;GO:0043230;GO:0043231;GO:0044421;GO:0044424;GO:0044444;GO:0044464;GO:0065010;GO:0070062	REACT_150417	16	16	13	43.1	43.1	38.7	62.615	191.41	84574000	248	0.849122	-1.10147	0.882391	-1.2482	0.0511532	-0.633173	0.934984	-1.41976	0.0870705	-0.903434	1.0838	-0.977228	-0.617863	-2.09629	-0.107447	-1.74263	0.996313	-0.410753	0.139639	-3.81511	0.540894	-1.65988	1.81126	0.683888	-0.988887	-2.81225	0.602468	-0.871319	1.21514
+	5.35107	1.30588	O94875	O94875	Sorbin and SH3 domain-containing protein 2	SORBS2	GO:0006928;GO:0006996;GO:0007010;GO:0007015;GO:0007155;GO:0009987;GO:0016043;GO:0016477;GO:0022610;GO:0030029;GO:0030036;GO:0040011;GO:0048870;GO:0071840;GO:0071841;GO:0071842	GO:0005198;GO:0005200;GO:0005488;GO:0005515;GO:0008092;GO:0008093;GO:0008307;GO:0030674;GO:0043167;GO:0043169;GO:0046872;GO:0060090	GO:0005634;GO:0005856;GO:0005886;GO:0015629;GO:0016020;GO:0030018;GO:0043226;GO:0043227;GO:0043228;GO:0043229;GO:0043231;GO:0043232;GO:0044422;GO:0044424;GO:0044444;GO:0044449;GO:0044464;GO:0048471		14	13	13	16	15	15	124.11	66.604	37899000	83	-2.00557	-2.09333	0.223797	0.307051	-1.90584	-3.25499	-0.687719	-4.75246	-2.50424	-1.60282	-2.68114	-2.59999	-4.2553	-4.40941	-1.20743	-3.42943	0.852861	-3.54321	1.1773	-3.66638	-2.14556	-4.54801	1.36638	-4.38248	1.67705	-4.68877	-2.1112	-2.54648	-1.20309
+	12.0027	1.3016	P01008;CON__P41361	P01008	Antithrombin-III	SERPINC1	GO:0007584;GO:0007596;GO:0007599;GO:0009605;GO:0009991;GO:0010466;GO:0010951;GO:0019222;GO:0030193;GO:0031347;GO:0031348;GO:0031667;GO:0032101;GO:0032102;GO:0032501;GO:0042221;GO:0043086;GO:0044092;GO:0048519;GO:0048583;GO:0048585;GO:0050727;GO:0050728;GO:0050789;GO:0050790;GO:0050817;GO:0050818;GO:0050878;GO:0050896;GO:0051239;GO:0051246;GO:0051336;GO:0051346;GO:0052547;GO:0052548;GO:0060255;GO:…	GO:0001871;GO:0002020;GO:0004857;GO:0004866;GO:0004867;GO:0005488;GO:0005515;GO:0005539;GO:0008201;GO:0019899;GO:0030234;GO:0030246;GO:0030247;GO:0030414;GO:0061134;GO:0061135	GO:0005576;GO:0005615;GO:0005886;GO:0016020;GO:0031982;GO:0031988;GO:0043226;GO:0043227;GO:0043230;GO:0044421;GO:0044464;GO:0065010;GO:0070062;GO:0072562	REACT_1439;REACT_326	29	29	28	63.4	63.4	62.3	52.602	323.31	1487600000	2218	2.77213	4.27949	2.93531	1.65878	4.08356	2.18431	3.89878	1.39042	3.54383	2.38138	3.78818	1.98207	1.58838	0.324532	3.39167	0.823162	1.68499	-0.0831528	3.14038	4.67525	3.69225	0.944214	3.40721	1.65471	3.13551	-0.474714	3.58482	1.15594	4.20657
+	11.7211	1.29788	P0C0L5	P0C0L5	Complement C4-B;Complement C4 beta chain;Complement C4-B alpha chain;C4a anaphylatoxin;C4b-B;C4d-B;Complement C4 gamma chain	C4B	GO:0002237;GO:0002252;GO:0002253;GO:0002376;GO:0002673;GO:0002682;GO:0002684;GO:0002697;GO:0002920;GO:0006950;GO:0006952;GO:0006954;GO:0006955;GO:0006956;GO:0006958;GO:0006959;GO:0008152;GO:0008228;GO:0009593;GO:0009595;GO:0009607;GO:0009611;GO:0010033;GO:0010468;GO:0019222;GO:0019538;GO:0030100;GO:0030449;GO:0031347;GO:0032101;GO:0032490;GO:0032879;GO:0042221;GO:0043170;GO:0044238;GO:0045087;GO:…	GO:0001848;GO:0004857;GO:0004866;GO:0005488;GO:0005515;GO:0030234;GO:0030246;GO:0030414;GO:0061134;GO:0061135	GO:0005576;GO:0005615;GO:0005886;GO:0016020;GO:0031982;GO:0031988;GO:0043226;GO:0043227;GO:0043230;GO:0044216;GO:0044217;GO:0044421;GO:0044464;GO:0065010;GO:0070062;GO:0072562	REACT_118707;REACT_7972;REACT_8024	81	81	5	61.2	61.2	5.6	192.75	323.31	3027900000	4818	1.82661	3.11782	3.14252	0.576069	4.00474	2.49469	4.0556	1.76465	3.62296	1.08209	4.55832	3.34748	2.66861	1.24064	4.48643	2.02559	2.04847	0.677452	4.58653	5.82146	2.56512	1.05825	2.38705	1.61915	3.1679	-0.475704	5.15406	2.26642	4.76316
+	6.43687	1.29179	O14791	O14791	Apolipoprotein L1	APOL1	GO:0001906;GO:0002376;GO:0006066;GO:0006629;GO:0006810;GO:0006811;GO:0006820;GO:0006821;GO:0006869;GO:0006897;GO:0006898;GO:0006950;GO:0006952;GO:0006955;GO:0008152;GO:0008202;GO:0008203;GO:0008219;GO:0009987;GO:0010324;GO:0015698;GO:0016043;GO:0016044;GO:0016125;GO:0016192;GO:0016265;GO:0019835;GO:0031640;GO:0042157;GO:0043170;GO:0044237;GO:0044238;GO:0044260;GO:0044281;GO:0045087;GO:0050896;GO:…	GO:0005215;GO:0005216;GO:0005253;GO:0005254;GO:0005488;GO:0008289;GO:0008509;GO:0015075;GO:0015267;GO:0022803;GO:0022838;GO:0022857;GO:0022891;GO:0022892	GO:0005576;GO:0005615;GO:0031224;GO:0032991;GO:0032994;GO:0034358;GO:0034361;GO:0034364;GO:0034385;GO:0044421;GO:0044425;GO:0044464;GO:0072562	REACT_160163	13	13	13	41	41	41	43.974	182.83	112700000	387	0.200379	1.89013	0.880852	0.31278	2.43644	0.698927	1.696	-0.121493	2.28858	0.717074	2.27153	1.31757	-0.466238	-2.60251	1.18528	-1.06388	-0.564249	-1.88552	1.78345	3.77334	1.73833	-1.27686	0.416628	-0.670194	0.108953	-1.75654	1.95751	0.294218	2.26165
+	6.65371	1.29143	Q9H479	Q9H479	Fructosamine-3-kinase	FN3K	GO:0005975;GO:0005996;GO:0006040;GO:0006066;GO:0006082;GO:0006520;GO:0006793;GO:0006796;GO:0006807;GO:0008152;GO:0009308;GO:0009987;GO:0016310;GO:0019752;GO:0030154;GO:0030389;GO:0030393;GO:0030855;GO:0032502;GO:0034641;GO:0042180;GO:0043436;GO:0044106;GO:0044237;GO:0044238;GO:0044262;GO:0044281;GO:0048869	GO:0003824;GO:0016301;GO:0016740;GO:0016772;GO:0030387			11	11	11	39.5	39.5	39.5	35.171	47.32	61424000	173	-1.87328	0.02244	0.504759	-3.34841	0.303493	-2.31231	-2.84059	-2.62775	0.847734	-2.07568	0.608835	-1.85399	-1.62239	-3.2982	1.38869	-3.1842	0.526407	-2.54592	1.28004	1.78292	-0.702499	-0.94375	-1.83805	-0.691382	0.372453	-3.46504	-1.03212	-1.29539	0.403214
+	5.05068	1.28937	Q5HYK7	Q5HYK7	SH3 domain-containing protein 19	SH3D19	GO:0006810;GO:0006892;GO:0006996;GO:0007010;GO:0009893;GO:0009894;GO:0009896;GO:0009987;GO:0010604;GO:0016043;GO:0016192;GO:0019222;GO:0022603;GO:0022604;GO:0030162;GO:0031323;GO:0031325;GO:0031329;GO:0031331;GO:0032268;GO:0032270;GO:0042176;GO:0045732;GO:0045862;GO:0046907;GO:0048193;GO:0048518;GO:0048522;GO:0050789;GO:0050793;GO:0050794;GO:0051043;GO:0051044;GO:0051128;GO:0051234;GO:0051246;GO:…	GO:0005488;GO:0005515;GO:0070064	GO:0005654;GO:0005794;GO:0005829;GO:0005886;GO:0016020;GO:0043226;GO:0043227;GO:0043229;GO:0043231;GO:0044422;GO:0044424;GO:0044428;GO:0044444;GO:0044446;GO:0044464	REACT_19400	7	7	7	11.3	11.3	11.3	86.524	15.352	28126000	57	-0.0260401	-1.35671	-0.582333	0.128283	-1.32702	-0.568808	-1.1724	-4.74586	-1.54041	-3.64891	-3.29451	-1.96062	-4.59109	-2.05616	-0.37109	-1.80037	-0.689642	-2.98334	-0.741772	-4.20844	-0.466326	-0.0939713	0.449547	-5.27663	-0.425906	-3.6729	-4.7566	-1.62294	-1.33352
+	7.75779	1.28806	P22897	P22897	Macrophage mannose receptor 1	MRC1	GO:0002237;GO:0006810;GO:0006897;GO:0006898;GO:0009607;GO:0009987;GO:0010033;GO:0010324;GO:0016043;GO:0016044;GO:0016192;GO:0032496;GO:0034097;GO:0034341;GO:0042221;GO:0050896;GO:0051234;GO:0051716;GO:0061024;GO:0070670;GO:0070887;GO:0071216;GO:0071219;GO:0071222;GO:0071310;GO:0071345;GO:0071346;GO:0071353;GO:0071840	GO:0004871;GO:0004872;GO:0004888;GO:0005488;GO:0005529;GO:0005537;GO:0030246;GO:0038023;GO:0048029;GO:0060089	GO:0005886;GO:0005887;GO:0009986;GO:0010008;GO:0016020;GO:0016021;GO:0031090;GO:0031224;GO:0031226;GO:0044422;GO:0044424;GO:0044425;GO:0044440;GO:0044444;GO:0044446;GO:0044459;GO:0044464	REACT_111056	50	50	45	45.1	45.1	38.7	166.01	323.31	646290000	1487	2.30155	0.493628	2.72733	0.0598412	2.20551	1.04263	2.43317	-0.937209	1.93187	-0.740735	2.29206	1.25674	2.03186	-0.0379105	1.79023	0.662521	2.22357	0.0533218	2.54008	-0.314065	3.13077	2.93814	1.91899	2.09936	2.36199	-2.34824	2.75139	-0.147051	1.26246
+	4.37249	1.28763	P08174	P08174	Complement decay-accelerating factor	CD55	GO:0001816;GO:0002250;GO:0002252;GO:0002253;GO:0002367;GO:0002369;GO:0002376;GO:0002440;GO:0002443;GO:0002449;GO:0002456;GO:0002460;GO:0002673;GO:0002682;GO:0002683;GO:0002684;GO:0002694;GO:0002696;GO:0002697;GO:0002698;GO:0002831;GO:0002920;GO:0002921;GO:0006873;GO:0006874;GO:0006875;GO:0006950;GO:0006952;GO:0006955;GO:0006956;GO:0006958;GO:0006959;GO:0007204;GO:0008152;GO:0008284;GO:0009892;GO:…	GO:0001618;GO:0004872;GO:0005488;GO:0008289	GO:0005576;GO:0005886;GO:0005887;GO:0009986;GO:0016020;GO:0016021;GO:0031224;GO:0031225;GO:0031226;GO:0031982;GO:0031988;GO:0043226;GO:0043227;GO:0043230;GO:0044421;GO:0044425;GO:0044459;GO:0044464;GO:0045121;GO:0065010;GO:0070062	REACT_118707;REACT_18372	9	9	7	28.3	28.3	20.5	41.4	27.982	93143000	107	1.80388	-1.06144	-1.03729	-0.692013	-1.76725	-2.63297	-1.03739	-4.56866	-2.26234	-1.0647	-0.836658	-3.47504	-4.71649	-3.91092	-0.221981	-3.31028	-0.510323	-5.1839	-0.291952	-0.843219	-2.05762	-0.326889	0	2.12608	2.24892	-4.50423	-0.96721	-2.16081	-1.149
+	6.65582	1.28492	P00746	P00746	Complement factor D	CFD	GO:0001775;GO:0002252;GO:0002253;GO:0002376;GO:0002576;GO:0002682;GO:0002684;GO:0006508;GO:0006810;GO:0006887;GO:0006950;GO:0006952;GO:0006955;GO:0006956;GO:0006957;GO:0006959;GO:0007596;GO:0007599;GO:0008152;GO:0009987;GO:0016192;GO:0019538;GO:0030168;GO:0032501;GO:0032940;GO:0043170;GO:0044238;GO:0045087;GO:0046903;GO:0048518;GO:0048583;GO:0048584;GO:0050776;GO:0050778;GO:0050789;GO:0050817;GO:…	GO:0003824;GO:0004175;GO:0004252;GO:0008233;GO:0008236;GO:0016787;GO:0017171;GO:0070011	GO:0005576;GO:0005615;GO:0031093;GO:0031974;GO:0031982;GO:0031983;GO:0031988;GO:0034774;GO:0043226;GO:0043227;GO:0043230;GO:0043233;GO:0044421;GO:0044422;GO:0044424;GO:0044433;GO:0044444;GO:0044446;GO:0044464;GO:0060205;GO:0065010;GO:0070062	REACT_318;REACT_8001	8	8	7	44.7	44.7	41.1	27.033	91.648	88017000	245	1.691	3.83261	1.24136	-1.48509	0.454327	-0.325096	2.28017	-1.73749	1.01263	0.426332	0.820225	-0.276751	0.333134	-2.40298	0.977036	-1.58369	0.856903	-1.94636	0.0580349	3.08657	1.82271	-1.16441	-0.231567	-0.261107	0.0632544	-2.07062	0.978879	1.41596	1.40432
+	4.48053	1.28401	O95436	O95436	Sodium-dependent phosphate transport protein 2B	SLC34A2	GO:0001701;GO:0006810;GO:0006811;GO:0006812;GO:0006814;GO:0006817;GO:0006820;GO:0006873;GO:0007568;GO:0009719;GO:0009725;GO:0009743;GO:0009746;GO:0009750;GO:0009790;GO:0009792;GO:0009987;GO:0010033;GO:0015672;GO:0015698;GO:0019725;GO:0030001;GO:0030002;GO:0030643;GO:0032355;GO:0032502;GO:0034220;GO:0034284;GO:0035435;GO:0035725;GO:0042221;GO:0042592;GO:0043009;GO:0043627;GO:0048545;GO:0048878;GO:…	GO:0005215;GO:0005436;GO:0005488;GO:0008324;GO:0008509;GO:0015075;GO:0015077;GO:0015081;GO:0015103;GO:0015114;GO:0015291;GO:0015293;GO:0015294;GO:0015296;GO:0015321;GO:0022804;GO:0022857;GO:0022890;GO:0022891;GO:0022892;GO:0031402;GO:0031420;GO:0042301;GO:0043167;GO:0043168;GO:0043169;GO:0046872;GO:0046873	GO:0005886;GO:0005887;GO:0016020;GO:0016021;GO:0016324;GO:0031224;GO:0031226;GO:0031253;GO:0031526;GO:0031528;GO:0031982;GO:0043226;GO:0044425;GO:0044459;GO:0044463;GO:0044464	REACT_19411	15	15	15	29.3	29.3	29.3	75.759	323.31	177510000	434	1.51842	-0.461802	1.05602	-0.0955029	0.678623	3.61875	1.42385	-4.42705	-0.250711	-2.7439	-0.0167561	-3.71372	0.180565	-3.60954	0.857597	1.87823	1.61056	-2.2717	-0.32662	-0.799563	1.63727	1.95343	-1.64568	0.806973	0.492061	-4.16513	1.31529	-2.5847	1.06944
+	5.25523	1.28087	Q92859	Q92859	Neogenin	NEO1	GO:0000768;GO:0006355;GO:0006935;GO:0006949;GO:0007155;GO:0007411;GO:0007520;GO:0009605;GO:0009889;GO:0009987;GO:0010468;GO:0010556;GO:0019219;GO:0019222;GO:0022610;GO:0030154;GO:0031323;GO:0031326;GO:0032502;GO:0040011;GO:0042221;GO:0042330;GO:0042592;GO:0042692;GO:0045595;GO:0045597;GO:0048518;GO:0048522;GO:0048646;GO:0048869;GO:0048878;GO:0050789;GO:0050793;GO:0050794;GO:0050801;GO:0050896;GO:…	GO:0004872	GO:0005886;GO:0005887;GO:0016020;GO:0016021;GO:0031224;GO:0031226;GO:0044425;GO:0044459;GO:0044464	REACT_21402;REACT_22237	9	9	8	11.5	11.5	9.3	160.01	86.076	82186000	52	1.83633	0.594915	-0.753828	0.370489	0.209034	-0.705526	-0.138435	-0.51827	0.761187	-4.35065	0.764307	-4.35161	-0.817581	-0.761292	1.32787	-0.839649	0.49011	-1.1749	0.173634	-3.48583	0.647589	0.709206	-0.130514	-0.365209	-0.416003	1.14902	0.569064	-0.610735	0.832146
+	7.7971	1.27953	Q96S97	Q96S97	Myeloid-associated differentiation marker	MYADM	GO:0001885;GO:0001932;GO:0001933;GO:0002064;GO:0006605;GO:0006810;GO:0006886;GO:0007162;GO:0008064;GO:0009892;GO:0009966;GO:0009968;GO:0009987;GO:0010468;GO:0010470;GO:0010563;GO:0010605;GO:0010627;GO:0010629;GO:0010639;GO:0010646;GO:0010648;GO:0010741;GO:0015031;GO:0016043;GO:0016044;GO:0019220;GO:0019222;GO:0022407;GO:0022408;GO:0022603;GO:0023051;GO:0023057;GO:0030155;GO:0030334;GO:0030335;GO:…		GO:0001726;GO:0005856;GO:0005886;GO:0005911;GO:0016020;GO:0016021;GO:0030054;GO:0030863;GO:0030864;GO:0031224;GO:0031982;GO:0031988;GO:0042995;GO:0043226;GO:0043227;GO:0043228;GO:0043229;GO:0043230;GO:0043232;GO:0044421;GO:0044422;GO:0044424;GO:0044425;GO:0044430;GO:0044444;GO:0044446;GO:0044448;GO:0044464;GO:0045121;GO:0065010;GO:0070062		4	4	3	19.3	19.3	15.8	35.273	93.822	118130000	288	2.47301	2.49407	1.33907	-5.34356	2.03601	0.841835	1.59653	-2.43211	1.16849	-1.4091	2.59995	1.50846	0.927334	0.152193	2.22919	0.601778	1.35011	0.44635	1.61478	0.695775	0.797438	0.681856	1.07211	0.489848	1.27373	-3.014	1.17454	0.288908	2.33162
+	6.38362	1.27707	P00740	P00740	Coagulation factor IX;Coagulation factor IXa light chain;Coagulation factor IXa heavy chain	F9	GO:0006464;GO:0006508;GO:0007596;GO:0007597;GO:0007598;GO:0007599;GO:0008152;GO:0009987;GO:0016485;GO:0017187;GO:0018193;GO:0018200;GO:0018214;GO:0019538;GO:0031638;GO:0032501;GO:0043170;GO:0043412;GO:0043687;GO:0044237;GO:0044238;GO:0044260;GO:0044267;GO:0050817;GO:0050878;GO:0050896;GO:0051604;GO:0065007;GO:0065008;GO:0072376	GO:0003824;GO:0004175;GO:0004252;GO:0005488;GO:0005509;GO:0008233;GO:0008236;GO:0016787;GO:0017171;GO:0043167;GO:0043169;GO:0046872;GO:0070011	GO:0005576;GO:0005615;GO:0005788;GO:0005796;GO:0005886;GO:0016020;GO:0031974;GO:0031982;GO:0031988;GO:0043226;GO:0043227;GO:0043230;GO:0043233;GO:0044421;GO:0044422;GO:0044424;GO:0044431;GO:0044432;GO:0044444;GO:0044446;GO:0044464;GO:0065010;GO:0070013;GO:0070062	REACT_1050;REACT_1573;REACT_1906;REACT_326;REACT_733	8	8	7	22.8	22.8	19.1	51.778	51.993	31418000	138	-0.927598	1.92377	-0.672251	-2.93416	-0.364285	-4.25234	-1.36796	-3.78709	-0.604889	-1.26497	-0.845016	-2.33873	-1.70519	-5.00362	-0.493347	-2.58454	-1.3061	-3.14722	0.105959	3.09348	-0.312176	-3.29091	-2.49301	-3.45439	-0.695148	-1.57034	-1.32423	-3.36808	0.070467
+	14.3809	1.27623	P27105	P27105	Erythrocyte band 7 integral membrane protein	STOM	GO:0002230;GO:0002682;GO:0002697;GO:0002831;GO:0006461;GO:0016043;GO:0022607;GO:0031347;GO:0043900;GO:0043933;GO:0048583;GO:0050688;GO:0050691;GO:0050789;GO:0051259;GO:0051260;GO:0065003;GO:0065007;GO:0071822;GO:0071840;GO:0080134	GO:0005488;GO:0005515;GO:0019899;GO:0070063	GO:0005615;GO:0005737;GO:0005739;GO:0005783;GO:0005856;GO:0005887;GO:0016020;GO:0016021;GO:0016023;GO:0031224;GO:0031226;GO:0031410;GO:0031982;GO:0031988;GO:0042470;GO:0043226;GO:0043227;GO:0043228;GO:0043229;GO:0043230;GO:0043231;GO:0043232;GO:0044421;GO:0044424;GO:0044425;GO:0044444;GO:0044459;GO:0044464;GO:0045121;GO:0048770;GO:0065010;GO:0070062;GO:0072562		19	19	19	66.3	66.3	66.3	31.73	323.31	1057400000	1053	3.45128	4.9797	3.41645	1.35788	3.44668	1.82364	3.23066	2.1201	3.73297	0.932666	3.96117	3.26105	3.48517	1.11518	3.88347	2.72238	3.75501	1.26604	4.06792	4.2162	3.43768	2.07851	3.67234	2.77296	4.06283	2.71123	3.32569	3.84773	3.15297
+	9.62778	1.27506	Q02153	Q02153	Guanylate cyclase soluble subunit beta-1	GUCY1B3	GO:0003008;GO:0003013;GO:0007165;GO:0007263;GO:0007596;GO:0007599;GO:0008015;GO:0009987;GO:0032501;GO:0050789;GO:0050794;GO:0050817;GO:0050878;GO:0050896;GO:0051716;GO:0065007;GO:0065008	GO:0000166;GO:0003824;GO:0004383;GO:0004872;GO:0005488;GO:0005506;GO:0005525;GO:0009975;GO:0016829;GO:0016849;GO:0017076;GO:0019001;GO:0020037;GO:0032553;GO:0032555;GO:0032561;GO:0035639;GO:0043167;GO:0043169;GO:0046872;GO:0046906;GO:0046914	GO:0005737;GO:0008074;GO:0032991;GO:0043226;GO:0043227;GO:0043229;GO:0043231;GO:0043234;GO:0044424;GO:0044444;GO:0044445;GO:0044464	REACT_23862	13	13	13	28.6	28.6	28.6	70.514	91.169	34224000	183	-2.25652	-3.42992	-1.06124	-2.8571	-1.53833	-2.72423	-1.78607	-3.3553	-0.882341	-4.42854	-1.16137	-2.15026	-2.36473	-1.91782	-1.39675	-0.82185	-1.00249	-3.69254	-0.337563	-3.0703	-4.591	-3.31501	-2.25284	-2.08012	-1.40111	-4.0023	-2.41617	-3.15537	-0.823904
+	8.81704	1.27444	Q8WWP7	Q8WWP7	GTPase IMAP family member 1	GIMAP1	GO:0001775;GO:0002376;GO:0002521;GO:0009987;GO:0030098;GO:0030154;GO:0030183;GO:0030217;GO:0032502;GO:0042110;GO:0042113;GO:0045321;GO:0046649;GO:0048869	GO:0000166;GO:0005488;GO:0005525;GO:0017076;GO:0019001;GO:0032553;GO:0032555;GO:0032561;GO:0035639	GO:0000139;GO:0005789;GO:0016020;GO:0016021;GO:0031090;GO:0031224;GO:0044422;GO:0044424;GO:0044425;GO:0044431;GO:0044432;GO:0044444;GO:0044446;GO:0044464		10	10	10	38.2	38.2	38.2	34.369	301.89	118030000	452	-0.23961	-0.270395	0.766808	-1.81962	0.287342	-0.1159	-0.924664	-2.20578	0.629028	-2.99852	0.739752	-0.797087	1.15927	0.112324	1.49476	0.319183	1.26665	-1.00928	1.27218	-0.479096	-0.709055	-1.26114	0.978239	-0.269017	0.385253	-1.95304	0.20218	-0.678488	0.722673
+	6.23397	1.27317	Q6P1M3	Q6P1M3	Lethal(2) giant larvae protein homolog 2	LLGL2	GO:0006810;GO:0006887;GO:0007049;GO:0009987;GO:0016192;GO:0032878;GO:0032940;GO:0046903;GO:0050789;GO:0050794;GO:0051234;GO:0051301;GO:0051649;GO:0065007	GO:0005488;GO:0005515;GO:0019904;GO:0030165	GO:0005654;GO:0005737;GO:0043226;GO:0043227;GO:0043229;GO:0043231;GO:0044422;GO:0044424;GO:0044428;GO:0044446;GO:0044464		20	20	19	30	30	28.3	113.45	212.21	82265000	206	1.22925	-0.0344791	0.131662	-2.39981	-2.11016	0.137503	-1.06147	-2.92576	-0.906172	-2.09642	0.520809	-2.63085	-1.52194	-3.94227	1.54762	-1.1694	0.205872	-3.11934	-0.826548	-0.525439	-0.200745	-1.67271	-1.47999	-3.85757	0.536468	-0.085247	0.299211	-3.11859	0.116325
+	6.87253	1.271	P36959	P36959	GMP reductase 1	GMPR	GO:0006139;GO:0006144;GO:0006725;GO:0006753;GO:0006807;GO:0006950;GO:0008152;GO:0009058;GO:0009112;GO:0009117;GO:0009266;GO:0009409;GO:0009628;GO:0009987;GO:0018130;GO:0034641;GO:0034654;GO:0043094;GO:0043101;GO:0044237;GO:0044238;GO:0044249;GO:0044271;GO:0044281;GO:0046483;GO:0050896;GO:0055086;GO:0072521;GO:0072522	GO:0003824;GO:0003920;GO:0005488;GO:0016491;GO:0016651;GO:0016657;GO:0043167;GO:0043169;GO:0046872	GO:0005829;GO:0044424;GO:0044444;GO:0044464	REACT_1923	7	7	6	27.2	27.2	24.3	37.418	62.309	30994000	137	-1.97222	-0.90468	-1.55652	-2.865	-1.30866	-3.07036	-0.507135	-1.89639	0.386381	-2.69129	-1.27513	-2.34004	-0.823898	-3.11908	0.363667	-1.12435	-0.816664	-3.30824	0.600454	2.35482	-3.64364	-1.80297	-1.77543	-3.27991	-1.07172	-5.8266	0.072957	-5.42059	-2.0356
+	5.53188	1.27069	P43251	P43251	Biotinidase	BTD	GO:0006082;GO:0006766;GO:0006767;GO:0006768;GO:0006790;GO:0006807;GO:0007417;GO:0008152;GO:0008544;GO:0009888;GO:0009987;GO:0019752;GO:0032502;GO:0032787;GO:0034641;GO:0042180;GO:0043436;GO:0043603;GO:0044237;GO:0044281;GO:0046483;GO:0048731;GO:0048856;GO:0051186	GO:0003824;GO:0004075;GO:0016787;GO:0016810;GO:0016811;GO:0016874;GO:0016879;GO:0047708	GO:0005576;GO:0005615;GO:0005730;GO:0005759;GO:0031974;GO:0031982;GO:0031988;GO:0043204;GO:0043226;GO:0043227;GO:0043228;GO:0043229;GO:0043230;GO:0043232;GO:0043233;GO:0044421;GO:0044422;GO:0044424;GO:0044428;GO:0044429;GO:0044444;GO:0044446;GO:0044464;GO:0045177;GO:0065010;GO:0070013;GO:0070062	REACT_11153;REACT_169403	7	7	5	19	19	13.6	61.132	19.553	55809000	191	0.495334	1.29235	0.14784	1.26176	1.47712	0.926216	1.36094	-0.578561	0.296293	-0.340676	0.651346	-0.857426	-2.88201	-3.55268	0.241432	-4.03173	-0.551916	-1.6668	0.685379	0.854489	-1.85612	0.263269	-4.09951	-1.2267	0.44805	-3.10345	1.21797	-0.272465	1.0281
+	7.41414	1.26938	Q9H4G4	Q9H4G4	Golgi-associated plant pathogenesis-related protein 1	GLIPR2	GO:0009966;GO:0009967;GO:0010627;GO:0010632;GO:0010634;GO:0010646;GO:0010647;GO:0010717;GO:0010718;GO:0010720;GO:0010740;GO:0010769;GO:0010770;GO:0022603;GO:0022604;GO:0023051;GO:0023056;GO:0030334;GO:0030335;GO:0032879;GO:0040012;GO:0040017;GO:0043408;GO:0043410;GO:0045595;GO:0045597;GO:0048518;GO:0048522;GO:0048583;GO:0048584;GO:0050789;GO:0050793;GO:0050794;GO:0051094;GO:0051128;GO:0051130;GO:…	GO:0005488;GO:0005515;GO:0042802;GO:0042803;GO:0046983	GO:0000139;GO:0016020;GO:0031090;GO:0031982;GO:0031988;GO:0043226;GO:0043227;GO:0043230;GO:0044421;GO:0044422;GO:0044424;GO:0044431;GO:0044444;GO:0044446;GO:0044464;GO:0065010;GO:0070062		6	6	6	54.5	54.5	54.5	17.218	97.376	158570000	296	1.18655	-0.295229	1.75291	-1.40623	1.60763	-0.156523	0.957348	-1.0903	1.18906	-2.46261	1.68742	1.0091	0.662739	-2.20829	1.56979	1.11632	1.85645	0.199074	1.92496	-2.07577	0.19968	-0.00300789	0.252125	0.0425024	1.92697	-3.16114	1.22908	-1.03128	1.07932
+	7.49042	1.26884	P00747;CON__P06868;Q02325;Q15195	P00747	Plasminogen;Plasmin heavy chain A;Activation peptide;Angiostatin;Plasmin heavy chain A, short form;Plasmin light chain B	PLG	GO:0001775;GO:0002576;GO:0006810;GO:0006887;GO:0007162;GO:0007596;GO:0007599;GO:0008152;GO:0008285;GO:0009987;GO:0010810;GO:0010812;GO:0016043;GO:0016192;GO:0019538;GO:0022407;GO:0022408;GO:0022411;GO:0022617;GO:0030155;GO:0030168;GO:0030193;GO:0030194;GO:0030195;GO:0030198;GO:0032101;GO:0032501;GO:0032940;GO:0033628;GO:0033629;GO:0042127;GO:0042730;GO:0043062;GO:0043170;GO:0044237;GO:0044238;GO:…	GO:0003824;GO:0004175;GO:0004252;GO:0005102;GO:0005488;GO:0005515;GO:0008233;GO:0008236;GO:0016787;GO:0017171;GO:0019904;GO:0034185;GO:0070011	GO:0005576;GO:0005615;GO:0005886;GO:0009986;GO:0016020;GO:0019897;GO:0019898;GO:0031093;GO:0031232;GO:0031974;GO:0031982;GO:0031983;GO:0031988;GO:0034774;GO:0043226;GO:0043227;GO:0043230;GO:0043233;GO:0044421;GO:0044422;GO:0044424;GO:0044425;GO:0044433;GO:0044444;GO:0044446;GO:0044459;GO:0044464;GO:0060205;GO:0065010;GO:0070062;GO:0072562	REACT_118572;REACT_118682;REACT_15428;REACT_16888;REACT_318;REACT_641	43	43	33	67	67	53.2	90.568	323.31	1080200000	1213	1.59491	4.9268	2.31485	-0.277502	3.5559	1.54316	3.26337	0.282832	3.05824	0.73602	3.08719	1.76256	1.74256	0.644407	3.24315	0.717642	2.10891	-0.47608	3.06042	6.23565	2.04051	0.169346	2.70166	1.97269	2.42624	-1.17069	3.62838	2.77179	4.22179
+	4.60697	1.268	Q9HCB6	Q9HCB6	Spondin-1	SPON1	GO:0005975;GO:0006464;GO:0006486;GO:0006493;GO:0007155;GO:0008152;GO:0009987;GO:0019538;GO:0022610;GO:0043170;GO:0043412;GO:0043413;GO:0043687;GO:0044237;GO:0044238;GO:0044260;GO:0044262;GO:0044267;GO:0070085		GO:0005578;GO:0005615;GO:0005788;GO:0031012;GO:0031974;GO:0043233;GO:0044421;GO:0044422;GO:0044424;GO:0044432;GO:0044444;GO:0044446;GO:0044464;GO:0070013	REACT_264269	17	17	14	32.2	32.2	26.5	90.973	128.79	117650000	155	-2.41562	-0.887327	-1.96557	-2.68638	-1.36928	-2.27525	-0.355396	-2.70042	-0.931774	-2.01278	-1.92461	-1.14395	-2.73664	-2.02854	-0.773321	-2.04197	0.293516	-0.65679	0.21043	-2.1145	-1.60547	-1.89058	1.65419	-1.64323	1.49558	-4.33065	-1.81688	-3.25213	-0.928415
+	8.93551	1.26427	P35609	P35609	Alpha-actinin-2	ACTN2	GO:0001775;GO:0002576;GO:0006461;GO:0006810;GO:0006873;GO:0006887;GO:0006928;GO:0007044;GO:0007154;GO:0007155;GO:0007267;GO:0007268;GO:0007596;GO:0007599;GO:0009987;GO:0010941;GO:0010959;GO:0016043;GO:0016192;GO:0019725;GO:0022607;GO:0022610;GO:0023052;GO:0030029;GO:0030030;GO:0030031;GO:0030035;GO:0030048;GO:0030049;GO:0030168;GO:0032501;GO:0032879;GO:0032880;GO:0032940;GO:0033275;GO:0034329;GO:…	GO:0000988;GO:0000989;GO:0003712;GO:0003713;GO:0005102;GO:0005178;GO:0005198;GO:0005488;GO:0005509;GO:0005515;GO:0008092;GO:0008307;GO:0010861;GO:0019904;GO:0030374;GO:0030375;GO:0030545;GO:0030546;GO:0031432;GO:0032403;GO:0042802;GO:0043167;GO:0043169;GO:0044325;GO:0046872;GO:0046983;GO:0051373;GO:0070080	GO:0005576;GO:0005829;GO:0005856;GO:0005884;GO:0005912;GO:0005924;GO:0005925;GO:0030018;GO:0030054;GO:0030055;GO:0030175;GO:0030863;GO:0030864;GO:0031093;GO:0031143;GO:0031974;GO:0031982;GO:0031983;GO:0031988;GO:0032991;GO:0034774;GO:0042995;GO:0043005;GO:0043197;GO:0043226;GO:0043227;GO:0043228;GO:0043229;GO:0043230;GO:0043232;GO:0043233;GO:0043234;GO:0044309;GO:0044421;GO:0044422;GO:0044424;GO:…	REACT_16969;REACT_20546;REACT_20594;REACT_20642;REACT_23832;REACT_318	27	10	9	32.9	14.8	13.6	103.85	27.614	11293000	37	-4.15113	-4.26058	-3.69476	-5.58972	-4.7152	-3.59218	-3.00233	-3.8902	-3.9918	-3.80019	-2.87919	-4.88247	-4.73237	-4.28926	-2.22721	-4.0016	-3.05893	-4.9729	-2.39252	-3.74049	-4.35525	-4.47373	-0.108356	-4.0245	-2.38847	-2.6644	-3.53649	-5.68947	-4.45465
+	6.46832	1.26315	Q8N1I0	Q8N1I0	Dedicator of cytokinesis protein 4	DOCK4	GO:0006140;GO:0006928;GO:0006935;GO:0007165;GO:0007264;GO:0009605;GO:0009894;GO:0009987;GO:0016477;GO:0019219;GO:0019222;GO:0030811;GO:0031323;GO:0031329;GO:0033121;GO:0033124;GO:0035556;GO:0040011;GO:0042221;GO:0042330;GO:0043085;GO:0043087;GO:0043547;GO:0044093;GO:0048870;GO:0050789;GO:0050790;GO:0050794;GO:0050896;GO:0051171;GO:0051336;GO:0051345;GO:0051716;GO:0060326;GO:0065007;GO:0065009;GO:…	GO:0005085;GO:0005096;GO:0005102;GO:0005488;GO:0005515;GO:0008047;GO:0017016;GO:0017048;GO:0019899;GO:0019904;GO:0030165;GO:0030234;GO:0030695;GO:0030971;GO:0031267;GO:0048365;GO:0051020;GO:0060589	GO:0005829;GO:0005902;GO:0012505;GO:0016020;GO:0032420;GO:0032421;GO:0042995;GO:0043226;GO:0043228;GO:0043229;GO:0043232;GO:0044422;GO:0044424;GO:0044444;GO:0044464	REACT_24970	13	13	13	10.2	10.2	10.2	225.2	52.128	104020000	153	0.922921	0.677118	1.58284	1.68544	0.797682	0.358541	0.884655	0.25701	1.71788	-0.564456	0.584358	1.81446	0.9244	-1.44678	1.32441	0.758926	1.39184	0.155767	0.541626	0.26794	2.5437	-1.29264	0.793871	1.00968	0.930356	-1.83262	-0.261336	0.0431919	0.028614
+	2.91323	1.26161	Q5VT79	Q5VT79	Annexin A8-like protein 2	ANXA8L2		GO:0005488;GO:0005509;GO:0005543;GO:0005544;GO:0008289;GO:0043167;GO:0043169;GO:0046872	GO:0031982;GO:0031988;GO:0043226;GO:0043227;GO:0043230;GO:0044421;GO:0065010;GO:0070062		19	19	2	60.6	60.6	11	36.879	323.31	161450000	356	1.69929	3.2954	-0.778336	-3.87209	-0.894009	-3.21799	0.452274	1.80604	-1.41045	-4.96079	-0.503981	1.45257	-2.24615	0.622175	-0.310266	-3.05813	-2.13834	1.68839	-1.46893	-2.77936	0.199278	-3.04939	-0.24913	-1.80184	-1.74459	3.16413	1.12224	-5.69527	0.599438
+	3.51104	1.25518	O14578	O14578	Citron Rho-interacting kinase	CIT	GO:0000070;GO:0000086;GO:0000280;GO:0000819;GO:0000910;GO:0006996;GO:0007030;GO:0007059;GO:0007067;GO:0007091;GO:0007165;GO:0007264;GO:0007276;GO:0007283;GO:0008064;GO:0009987;GO:0010721;GO:0010769;GO:0010975;GO:0016043;GO:0016358;GO:0022008;GO:0022402;GO:0022403;GO:0022414;GO:0022603;GO:0022604;GO:0030030;GO:0030154;GO:0030832;GO:0031175;GO:0031344;GO:0031345;GO:0032465;GO:0032467;GO:0032501;GO:…	GO:0000166;GO:0003824;GO:0004672;GO:0004674;GO:0005488;GO:0005515;GO:0005524;GO:0016301;GO:0016740;GO:0016772;GO:0016773;GO:0017076;GO:0019904;GO:0030165;GO:0030554;GO:0032553;GO:0032555;GO:0032559;GO:0035639;GO:0043167;GO:0043169;GO:0046872;GO:0097110	GO:0001726;GO:0005773;GO:0005829;GO:0005856;GO:0005886;GO:0015629;GO:0016020;GO:0031984;GO:0031985;GO:0042995;GO:0043025;GO:0043226;GO:0043227;GO:0043228;GO:0043229;GO:0043231;GO:0043232;GO:0044297;GO:0044422;GO:0044424;GO:0044431;GO:0044444;GO:0044446;GO:0044464	REACT_355303	26	26	25	16.8	16.8	15.1	231.43	133.57	481060000	51	1.2432	2.51593	2.73778	-3.93426	2.09482	1.5749	3.11069	-4.58928	2.30469	0.31631	3.0505	-4.10587	3.14836	2.40406	3.25627	1.23925	2.63915	-1.4162	2.2963	2.23925	1.75438	1.69176	2.97838	2.38977	1.99495	3.36714	3.30054	1.01656	3.57492
+	4.86735	1.25343	P05154	P05154	Plasma serine protease inhibitor	SERPINA5	GO:0006810;GO:0006869;GO:0006944;GO:0007276;GO:0007283;GO:0007342;GO:0007596;GO:0007599;GO:0009987;GO:0010466;GO:0010951;GO:0016043;GO:0016044;GO:0019222;GO:0022412;GO:0022414;GO:0032501;GO:0043086;GO:0044092;GO:0045026;GO:0048232;GO:0048609;GO:0048610;GO:0050789;GO:0050790;GO:0050817;GO:0050878;GO:0051234;GO:0051336;GO:0051346;GO:0052547;GO:0052548;GO:0061024;GO:0061025;GO:0065007;GO:0065008;GO:…	GO:0001871;GO:0001972;GO:0002020;GO:0004857;GO:0004866;GO:0004867;GO:0005488;GO:0005501;GO:0005515;GO:0005539;GO:0005543;GO:0008201;GO:0008289;GO:0019840;GO:0019899;GO:0030234;GO:0030246;GO:0030247;GO:0030414;GO:0031210;GO:0031406;GO:0032190;GO:0033293;GO:0043167;GO:0043169;GO:0043176;GO:0043178;GO:0050997;GO:0061134;GO:0061135	GO:0002080;GO:0005576;GO:0005615;GO:0009897;GO:0012506;GO:0016020;GO:0016023;GO:0030141;GO:0030659;GO:0030667;GO:0031090;GO:0031091;GO:0031094;GO:0031410;GO:0031982;GO:0031988;GO:0032991;GO:0043226;GO:0043227;GO:0043229;GO:0043230;GO:0043231;GO:0043234;GO:0044421;GO:0044422;GO:0044424;GO:0044425;GO:0044433;GO:0044444;GO:0044446;GO:0044459;GO:0044464;GO:0065010;GO:0070062	REACT_1439;REACT_326	10	10	10	30.8	30.8	30.8	45.674	37.043	34589000	78	-4.24514	-3.833	-2.11731	-0.306787	0.546595	-3.63935	-0.847372	-4.3368	-1.03282	-3.86829	-0.601719	-1.87934	-1.93598	-3.52161	-1.45147	-2.32604	-1.94802	-4.24498	-0.248789	1.88006	-3.59984	-3.56766	-4.62997	-1.28367	-0.38581	-3.99361	-1.06076	-5.21275	1.06795
+	8.08669	1.25317	Q8N3V7	Q8N3V7	Synaptopodin	SYNPO	GO:0010638;GO:0032231;GO:0032233;GO:0032956;GO:0032970;GO:0033043;GO:0044087;GO:0048518;GO:0048522;GO:0050789;GO:0050794;GO:0051128;GO:0051130;GO:0051492;GO:0051493;GO:0051495;GO:0065007	GO:0003779;GO:0005488;GO:0005515;GO:0008092	GO:0001725;GO:0005737;GO:0005856;GO:0005911;GO:0005923;GO:0014069;GO:0015629;GO:0016020;GO:0030054;GO:0032432;GO:0042641;GO:0042995;GO:0043005;GO:0043197;GO:0043204;GO:0043226;GO:0043228;GO:0043229;GO:0043232;GO:0044309;GO:0044422;GO:0044424;GO:0044430;GO:0044446;GO:0044456;GO:0044463;GO:0044464;GO:0045211;GO:0070160;GO:0097060		11	11	11	17.8	17.8	17.8	99.462	102.66	107950000	269	1.4309	-1.92642	1.04299	1.31715	1.0928	0.173126	-0.0171242	-1.69993	0.136171	-1.47144	1.76457	-0.375721	-0.163576	-3.08196	-1.94356	0.751076	0.989273	-2.32619	1.19509	0.378514	-1.53055	-0.165377	0.889589	0.728562	1.70063	-2.70088	0.0183172	-1.50686	0.907843
+	8.41684	1.2481	Q9NTX5	Q9NTX5	Ethylmalonyl-CoA decarboxylase	ECHDC1		GO:0003824;GO:0004492;GO:0016829;GO:0016830;GO:0016831	GO:0005829;GO:0031982;GO:0031988;GO:0043226;GO:0043227;GO:0043230;GO:0044421;GO:0044424;GO:0044444;GO:0044464;GO:0065010;GO:0070062		14	14	13	59.9	59.9	53.1	33.698	300.25	163190000	405	0.497836	0.117893	1.29095	-3.65541	-0.471514	0.414021	1.30072	-1.13593	0.212734	-0.967141	-0.539436	0.140722	0.451042	-2.2218	1.0881	0.678577	0.990295	-1.62807	1.7587	-3.52425	-0.39432	-0.80299	0.199444	0.949546	1.77013	-1.50546	1.0259	-0.850489	1.25048
+	13.3922	1.24337	Q9H2D6	Q9H2D6	TRIO and F-actin-binding protein	TRIOBP	GO:0000280;GO:0006464;GO:0006996;GO:0007010;GO:0007067;GO:0008064;GO:0008152;GO:0009987;GO:0010639;GO:0016043;GO:0019538;GO:0022402;GO:0022403;GO:0030029;GO:0030036;GO:0030047;GO:0030832;GO:0030833;GO:0030834;GO:0030835;GO:0030837;GO:0031333;GO:0032271;GO:0032272;GO:0032535;GO:0032956;GO:0032970;GO:0033043;GO:0043170;GO:0043242;GO:0043244;GO:0043254;GO:0043412;GO:0044087;GO:0044237;GO:0044238;GO:…	GO:0003779;GO:0005488;GO:0005515;GO:0008092;GO:0017016;GO:0017022;GO:0017048;GO:0017049;GO:0019899;GO:0031267;GO:0031625;GO:0045159;GO:0051015;GO:0051020	GO:0005634;GO:0005737;GO:0005815;GO:0005856;GO:0005912;GO:0005924;GO:0005925;GO:0015629;GO:0030054;GO:0030055;GO:0030496;GO:0043226;GO:0043227;GO:0043228;GO:0043229;GO:0043231;GO:0043232;GO:0044422;GO:0044424;GO:0044430;GO:0044444;GO:0044446;GO:0044464;GO:0070161		23	22	21	10.5	10.1	9.9	261.37	120.77	144980000	363	1.55142	-1.64385	1.22531	0.197483	1.24033	1.50921	1.14257	-0.568654	1.55927	-0.674623	1.54647	-0.28266	-0.507061	-0.923683	1.73783	-0.0828094	0.30962	-0.960629	1.04368	-2.73463	2.04242	0.796598	1.70224	0.352283	1.30944	-0.117828	0.004426	-0.809628	0.982641
+	3.66264	1.24077	P49247	P49247	Ribose-5-phosphate isomerase	RPIA	GO:0005975;GO:0005996;GO:0006006;GO:0006007;GO:0006066;GO:0006098;GO:0006139;GO:0006732;GO:0006733;GO:0006739;GO:0006740;GO:0006753;GO:0006807;GO:0008152;GO:0009052;GO:0009056;GO:0009117;GO:0009987;GO:0016052;GO:0019318;GO:0019320;GO:0019321;GO:0019362;GO:0034641;GO:0044237;GO:0044238;GO:0044262;GO:0044275;GO:0044281;GO:0044282;GO:0046164;GO:0046365;GO:0046483;GO:0046496;GO:0051186;GO:0055086;GO:…	GO:0003824;GO:0004751;GO:0005488;GO:0005529;GO:0016853;GO:0016860;GO:0016861;GO:0030246;GO:0048029	GO:0005829;GO:0043226;GO:0043227;GO:0043229;GO:0043231;GO:0044424;GO:0044444;GO:0044464	REACT_1859	7	7	7	28.9	28.9	28.9	33.269	29.526	74212000	98	-0.533586	2.02018	1.3679	-0.583876	2.09993	0.791883	0.970236	1.47348	0.868593	-0.983058	0.733097	0.720116	-1.27727	0.540955	2.90524	0.977844	-0.0961361	0.543499	2.79979	2.31924	1.74466	-0.889898	-4.8229	0.217523	-0.691262	0.313974	0.616057	-1.7795	4.91835
+	10.8069	1.23759	P00352	P00352	Retinal dehydrogenase 1	ALDH1A1	GO:0001523;GO:0006066;GO:0006067;GO:0006069;GO:0006081;GO:0006140;GO:0006629;GO:0006720;GO:0006721;GO:0006766;GO:0006775;GO:0006776;GO:0006805;GO:0008152;GO:0009894;GO:0009987;GO:0010817;GO:0016101;GO:0019219;GO:0019222;GO:0030811;GO:0031323;GO:0031329;GO:0033121;GO:0033124;GO:0034308;GO:0034754;GO:0042445;GO:0042572;GO:0043085;GO:0043087;GO:0043547;GO:0044093;GO:0044237;GO:0044238;GO:0044255;GO:…	GO:0001758;GO:0003824;GO:0004028;GO:0004029;GO:0005096;GO:0005488;GO:0005496;GO:0005497;GO:0008047;GO:0008289;GO:0016491;GO:0016620;GO:0016903;GO:0018479;GO:0030234;GO:0030695;GO:0042562;GO:0060589	GO:0005737;GO:0005829;GO:0031982;GO:0031988;GO:0043226;GO:0043227;GO:0043230;GO:0044421;GO:0044424;GO:0044444;GO:0044464;GO:0065010;GO:0070062	REACT_268561;REACT_34	35	35	33	74.3	74.3	65.9	54.861	323.31	2699100000	1979	4.2057	4.27191	4.58394	1.03967	4.60143	2.89131	5.20779	5.15326	5.16095	2.70088	4.6077	3.57673	3.50967	3.49883	4.78278	3.06413	3.9005	2.27676	4.93547	4.25588	3.26754	2.26519	5.00137	4.11238	5.17169	4.44875	4.64885	3.47896	4.8733
+	8.90573	1.23554	Q13418	Q13418	Integrin-linked protein kinase	ILK	GO:0000902;GO:0000904;GO:0001558;GO:0001658;GO:0001667;GO:0001763;GO:0001932;GO:0001952;GO:0001954;GO:0002009;GO:0006355;GO:0006461;GO:0006464;GO:0006468;GO:0006469;GO:0006793;GO:0006796;GO:0006928;GO:0007050;GO:0007155;GO:0007160;GO:0007163;GO:0007165;GO:0007166;GO:0007229;GO:0007243;GO:0007272;GO:0007568;GO:0007569;GO:0008152;GO:0008283;GO:0008284;GO:0008285;GO:0008366;GO:0009653;GO:0009889;GO:…	GO:0000166;GO:0003824;GO:0004672;GO:0004674;GO:0004871;GO:0005488;GO:0005515;GO:0005524;GO:0016301;GO:0016740;GO:0016772;GO:0016773;GO:0017076;GO:0019899;GO:0019900;GO:0019901;GO:0030554;GO:0032553;GO:0032555;GO:0032559;GO:0035639;GO:0060089	GO:0001725;GO:0005654;GO:0005737;GO:0005829;GO:0005886;GO:0005911;GO:0005912;GO:0005924;GO:0005925;GO:0016020;GO:0030017;GO:0030027;GO:0030054;GO:0030055;GO:0032432;GO:0032991;GO:0033267;GO:0042641;GO:0042995;GO:0043025;GO:0043034;GO:0043195;GO:0043198;GO:0043234;GO:0044297;GO:0044422;GO:0044424;GO:0044428;GO:0044430;GO:0044444;GO:0044446;GO:0044449;GO:0044456;GO:0044463;GO:0044464;GO:0070161	REACT_20617;REACT_20649	20	20	18	50.7	50.7	44.2	51.419	228.27	351960000	648	2.21443	-0.596313	2.07524	-0.937103	1.61491	-0.437141	2.68535	-0.0515604	0.360271	-0.173774	2.44453	1.76903	1.65886	0.902889	2.42442	1.20357	2.06918	0.911398	2.97334	-0.674951	0.622213	0.718258	2.13368	2.18823	3.0396	-1.30218	2.17213	-3.39563	1.97343
+	4.38968	1.23198	Q99715	Q99715	Collagen alpha-1(XII) chain	COL12A1	GO:0001501;GO:0007155;GO:0008152;GO:0009987;GO:0016043;GO:0022411;GO:0022610;GO:0022617;GO:0030154;GO:0030198;GO:0030199;GO:0030574;GO:0032501;GO:0032502;GO:0032963;GO:0035987;GO:0043062;GO:0043170;GO:0044236;GO:0044243;GO:0044259;GO:0048731;GO:0048856;GO:0048869;GO:0071840;GO:0071841;GO:0071842;GO:0071845	GO:0005198;GO:0005201;GO:0030020	GO:0005576;GO:0005581;GO:0005593;GO:0005595;GO:0005615;GO:0005788;GO:0030934;GO:0031012;GO:0031974;GO:0031982;GO:0031988;GO:0043226;GO:0043227;GO:0043230;GO:0043233;GO:0044420;GO:0044421;GO:0044422;GO:0044424;GO:0044432;GO:0044444;GO:0044446;GO:0044464;GO:0065010;GO:0070013;GO:0070062	REACT_121139;REACT_150401	128	128	126	52	52	51.6	333.14	323.31	1385500000	2338	2.4185	4.14754	3.05838	-1.33794	2.37667	0.649088	1.84872	1.54423	1.43621	1.83688	2.26952	4.25814	-0.586725	3.8195	3.5477	1.55862	2.33391	1.22019	3.37519	2.22568	0.277525	0.839329	2.08324	-1.25771	3.29241	-1.49496	2.29457	3.70845	3.45804
+	6.33893	1.22458	O43294	O43294	Transforming growth factor beta-1-induced transcript 1 protein	TGFB1I1	GO:0002009;GO:0006139;GO:0006351;GO:0006355;GO:0006366;GO:0006508;GO:0006511;GO:0006807;GO:0006950;GO:0007155;GO:0007165;GO:0007166;GO:0008152;GO:0008285;GO:0009056;GO:0009057;GO:0009058;GO:0009059;GO:0009266;GO:0009408;GO:0009628;GO:0009653;GO:0009889;GO:0009891;GO:0009893;GO:0009966;GO:0009967;GO:0009968;GO:0009987;GO:0010468;GO:0010556;GO:0010557;GO:0010604;GO:0010628;GO:0010646;GO:0010647;GO:…	GO:0000988;GO:0000989;GO:0003712;GO:0003713;GO:0005102;GO:0005488;GO:0005515;GO:0008270;GO:0035257;GO:0035258;GO:0043167;GO:0043169;GO:0046332;GO:0046872;GO:0046914;GO:0048495;GO:0050681;GO:0051427;GO:0070411	GO:0005622;GO:0005737;GO:0005856;GO:0005912;GO:0005924;GO:0005925;GO:0016363;GO:0030054;GO:0030055;GO:0043226;GO:0043228;GO:0043229;GO:0043232;GO:0044422;GO:0044424;GO:0044428;GO:0044446;GO:0044464;GO:0070161		9	9	9	31.2	31.2	31.2	49.814	234.88	213070000	373	3.11545	-3.30159	1.79974	2.16437	1.00146	0.919386	2.52753	-0.417535	1.50662	2.5575	2.27127	1.43084	0.331337	0.585304	1.28567	0.345156	1.06586	-3.1797	1.63083	-1.56496	2.1128	1.90336	2.4154	-0.609166	2.22433	-1.65187	1.40523	-2.40524	1.66628
+	2.48226	1.21983	P0DJI8	P0DJI8	Serum amyloid A-1 protein;Amyloid protein A;Serum amyloid protein A(2-104);Serum amyloid protein A(3-104);Serum amyloid protein A(2-103);Serum amyloid protein A(2-102);Serum amyloid protein A(4-101)	SAA1	GO:0000187;GO:0001775;GO:0001817;GO:0001819;GO:0001932;GO:0002376;GO:0002526;GO:0006464;GO:0006468;GO:0006793;GO:0006796;GO:0006810;GO:0006873;GO:0006874;GO:0006875;GO:0006897;GO:0006898;GO:0006928;GO:0006935;GO:0006950;GO:0006952;GO:0006953;GO:0006954;GO:0006955;GO:0007204;GO:0008152;GO:0009605;GO:0009611;GO:0009966;GO:0009987;GO:0010324;GO:0016043;GO:0016044;GO:0016192;GO:0016310;GO:0016477;GO:…	GO:0001664;GO:0001871;GO:0005102;GO:0005488;GO:0005515;GO:0005539;GO:0008201;GO:0030246;GO:0030247;GO:0042056	GO:0005576;GO:0005615;GO:0005874;GO:0005881;GO:0031974;GO:0031982;GO:0031983;GO:0031988;GO:0032991;GO:0032994;GO:0034358;GO:0034364;GO:0043226;GO:0043227;GO:0043230;GO:0043233;GO:0043234;GO:0044421;GO:0044422;GO:0044424;GO:0044430;GO:0044433;GO:0044444;GO:0044446;GO:0044464;GO:0060205;GO:0065010;GO:0070062;GO:0071682	REACT_118563;REACT_163679;REACT_163773;REACT_18283;REACT_19231;REACT_21264;REACT_21281;REACT_24969;REACT_25195;REACT_75925	6	6	4	65.6	65.6	42.6	13.532	167.72	151500000	254	0.0442247	0.270809	-2.30424	-0.461761	-1.30663	-2.75513	1.4622	-0.756032	-0.51577	-0.95893	2.66884	1.29475	-2.91269	-4.23883	0.0237846	-3.05966	-3.44346	-0.761599	1.53426	3.16777	-0.212301	-0.773222	-0.286184	-0.788705	-4.86689	-4.12156	1.69531	-1.80251	1.28948
+	11.5073	1.21971	P51659	P51659	Peroxisomal multifunctional enzyme type 2;(3R)-hydroxyacyl-CoA dehydrogenase;Enoyl-CoA hydratase 2	HSD17B4	GO:0000038;GO:0001649;GO:0003006;GO:0006082;GO:0006629;GO:0006631;GO:0006635;GO:0006694;GO:0006699;GO:0008152;GO:0008202;GO:0008206;GO:0008209;GO:0008210;GO:0008610;GO:0009056;GO:0009058;GO:0009062;GO:0009987;GO:0010817;GO:0016042;GO:0016053;GO:0016054;GO:0019395;GO:0019752;GO:0022414;GO:0030154;GO:0030258;GO:0032502;GO:0032787;GO:0033540;GO:0033559;GO:0034440;GO:0034754;GO:0042180;GO:0042445;GO:…	GO:0003824;GO:0003857;GO:0005102;GO:0005488;GO:0005515;GO:0016491;GO:0016508;GO:0016614;GO:0016616;GO:0016829;GO:0016835;GO:0016836;GO:0016853;GO:0033989;GO:0042802;GO:0042803;GO:0046983	GO:0005739;GO:0005777;GO:0005778;GO:0005782;GO:0016020;GO:0031090;GO:0031903;GO:0031907;GO:0031974;GO:0042579;GO:0043226;GO:0043227;GO:0043229;GO:0043231;GO:0043233;GO:0044422;GO:0044424;GO:0044438;GO:0044439;GO:0044444;GO:0044446;GO:0044464;GO:0070013	REACT_11041;REACT_121147;REACT_17017;REACT_17062	43	43	43	67.9	67.9	67.9	79.685	323.31	1235100000	2258	1.77801	1.38292	1.47715	-0.80435	1.22919	0.265924	1.21615	-0.663251	1.46058	-1.52415	2.00308	0.431824	3.53411	0.810701	2.86224	2.36716	3.3041	0.99523	3.27745	1.95747	0.698544	0.101265	2.18345	2.42617	2.9664	-0.831816	3.354	0.682419	2.6829
+	5.41256	1.21892	Q6PCB0	Q6PCB0	von Willebrand factor A domain-containing protein 1	VWA1	GO:0006950;GO:0007610;GO:0009987;GO:0016043;GO:0030198;GO:0032501;GO:0033555;GO:0043062;GO:0048265;GO:0048266;GO:0050896;GO:0071840;GO:0071841;GO:0071842		GO:0005578;GO:0005604;GO:0005614;GO:0005615;GO:0031012;GO:0031982;GO:0031988;GO:0043226;GO:0043227;GO:0043230;GO:0044420;GO:0044421;GO:0065010;GO:0070062		9	9	9	40.9	40.9	40.9	46.804	103.36	72474000	251	-1.95724	2.53898	-2.12863	-2.14097	-1.69796	-1.446	-2.46506	-4.11478	-2.72075	-2.36454	-1.84416	-1.38239	-0.596315	-1.21997	-0.0766239	0.139091	-0.869293	-0.992075	0.623205	-2.40703	-3.92569	-2.39846	-1.07797	-4.16777	0.374261	-3.20887	-3.10069	-3.57587	0.475702
+	2.98048	1.21878	Q92530	Q92530	Proteasome inhibitor PI31 subunit	PSMF1	GO:0000082;GO:0000209;GO:0000278;GO:0002218;GO:0002220;GO:0002223;GO:0002253;GO:0002376;GO:0002429;GO:0002474;GO:0002478;GO:0002479;GO:0002682;GO:0002684;GO:0002757;GO:0002758;GO:0002764;GO:0002768;GO:0006464;GO:0006508;GO:0006511;GO:0006521;GO:0006807;GO:0006915;GO:0006950;GO:0006952;GO:0006955;GO:0006974;GO:0006977;GO:0007049;GO:0007165;GO:0007166;GO:0008152;GO:0008219;GO:0009056;GO:0009057;GO:…	GO:0004857;GO:0004866;GO:0005488;GO:0005515;GO:0030234;GO:0030414;GO:0032403;GO:0061134;GO:0061135;GO:0070628	GO:0005654;GO:0005737;GO:0005783;GO:0005829;GO:0005839;GO:0016020;GO:0032991;GO:0043226;GO:0043227;GO:0043229;GO:0043231;GO:0043234;GO:0044422;GO:0044424;GO:0044428;GO:0044444;GO:0044446;GO:0044464	REACT_11063;REACT_111056;REACT_111178;REACT_1156;REACT_118656;REACT_1221;REACT_13464;REACT_13565;REACT_150471;REACT_1614;REACT_188323;REACT_188330;REACT_1949;REACT_20549;REACT_25325;REACT_263873;REACT_263883;REACT_264438;REACT_264478;REACT_264605;REACT_267700;REACT_268156;REACT_268366;REACT_268718;REACT_4;REACT_6761;REACT_6785;REACT_6821;REACT_6850;REACT_6871;REACT_75842;REACT_9003;REACT_9031;REA…	8	8	7	45	45	38.4	29.816	32.367	130530000	211	1.89391	-1.26495	1.70449	1.12137	2.86771	1.89165	2.25601	-0.876716	3.09606	2.34362	2.22029	-0.245571	-5.54079	1.77454	2.14934	-1.35967	0.242035	-4.21145	3.55437	3.1406	0.713087	-2.19277	0.398378	1.96928	1.9367	0.691385	-2.82444	-1.24786	0.605797
+	5.42759	1.21449	P15169;CON__Q2KJ83	P15169	Carboxypeptidase N catalytic chain	CPN1	GO:0006518;GO:0008152;GO:0009056;GO:0009719;GO:0009725;GO:0009987;GO:0010033;GO:0010815;GO:0031960;GO:0042221;GO:0043171;GO:0044237;GO:0044248;GO:0048545;GO:0050896;GO:0051384	GO:0003824;GO:0004180;GO:0004181;GO:0005488;GO:0008233;GO:0008235;GO:0008237;GO:0008238;GO:0008270;GO:0016787;GO:0043167;GO:0043169;GO:0046872;GO:0046914;GO:0070011	GO:0005615;GO:0044421	REACT_15550	4	4	4	20.1	20.1	20.1	52.286	65.164	15595000	93	-4.20098	-1.85914	-4.42333	-2.69945	-1.40103	-4.5553	0.528246	-3.39118	-4.01165	-3.51784	-1.84485	-2.40427	-4.92842	-5.31362	-1.5242	-3.65407	-3.64717	-4.72554	-0.711655	0.809428	-4.39553	-4.38802	-2.8362	-3.44236	-3.83172	-4.83135	-1.41699	-4.86203	0.186394
+	7.35248	1.21421	P02765;CON__P12763	P02765	Alpha-2-HS-glycoprotein;Alpha-2-HS-glycoprotein chain A;Alpha-2-HS-glycoprotein chain B	AHSG	GO:0001501;GO:0001503;GO:0002526;GO:0006810;GO:0006897;GO:0006907;GO:0006950;GO:0006952;GO:0006953;GO:0006954;GO:0009611;GO:0009892;GO:0009966;GO:0009968;GO:0009987;GO:0010324;GO:0010563;GO:0010646;GO:0010648;GO:0016043;GO:0016044;GO:0016192;GO:0019220;GO:0019222;GO:0023051;GO:0023057;GO:0030100;GO:0030278;GO:0030279;GO:0030500;GO:0030502;GO:0031323;GO:0031324;GO:0031347;GO:0032101;GO:0032501;GO:…	GO:0004857;GO:0004866;GO:0004869;GO:0019207;GO:0019210;GO:0030234;GO:0030414;GO:0061134;GO:0061135	GO:0005576;GO:0005615;GO:0031982;GO:0031988;GO:0043226;GO:0043227;GO:0043230;GO:0044421;GO:0065010;GO:0070062;GO:0072562		12	12	11	50.1	50.1	43.6	39.34	323.31	1994900000	1223	5.41334	6.57875	4.57183	5.39199	6.15239	4.98864	6.59448	4.17475	6.13536	4.70472	5.38724	3.53322	3.53897	1.41372	4.84472	2.20044	3.68656	1.37181	4.93269	7.10844	5.92051	4.56487	5.43393	4.63299	3.92411	0.595472	5.50767	3.41252	5.502
+	6.85326	1.21418	P06681	P06681	Complement C2;Complement C2b fragment;Complement C2a fragment	C2	GO:0002252;GO:0002253;GO:0002376;GO:0002673;GO:0002682;GO:0002684;GO:0002697;GO:0002920;GO:0006950;GO:0006952;GO:0006955;GO:0006956;GO:0006958;GO:0006959;GO:0007584;GO:0008152;GO:0009605;GO:0009991;GO:0010468;GO:0019222;GO:0019538;GO:0030100;GO:0030449;GO:0031347;GO:0031667;GO:0032101;GO:0032879;GO:0042221;GO:0043170;GO:0044238;GO:0045087;GO:0045807;GO:0048518;GO:0048522;GO:0048583;GO:0048584;GO:…	GO:0003824;GO:0004175;GO:0004252;GO:0005488;GO:0008233;GO:0008236;GO:0016787;GO:0017171;GO:0043167;GO:0043169;GO:0046872;GO:0070011	GO:0005576;GO:0005615;GO:0031982;GO:0031988;GO:0043226;GO:0043227;GO:0043230;GO:0044421;GO:0065010;GO:0070062	REACT_118707;REACT_7972;REACT_8024	20	20	18	31.6	31.6	27.5	83.267	79.724	151670000	482	-0.089036	0.810709	0.390949	1.05869	1.29822	-0.441372	1.53083	-1.98718	1.26029	-0.96127	1.31793	0.0940857	0.155521	-1.86969	1.14544	-2.753	-2.226	-2.22803	1.06753	2.45463	0.644011	-0.395357	-0.935373	-0.958953	0.333165	-4.15876	1.10598	0.00536537	1.40386
+	5.51997	1.20913	Q9HBI1	Q9HBI1	Beta-parvin	PARVB	GO:0006996;GO:0007010;GO:0007155;GO:0007163;GO:0008360;GO:0009987;GO:0016043;GO:0022603;GO:0022604;GO:0022607;GO:0022610;GO:0030029;GO:0030030;GO:0030031;GO:0030032;GO:0030036;GO:0031532;GO:0034329;GO:0034330;GO:0050789;GO:0050793;GO:0050794;GO:0051128;GO:0065007;GO:0065008;GO:0071840;GO:0071841;GO:0071842;GO:0071844;GO:0071963		GO:0005829;GO:0005856;GO:0005886;GO:0005912;GO:0005924;GO:0005925;GO:0016020;GO:0030018;GO:0030027;GO:0030054;GO:0030055;GO:0042995;GO:0043226;GO:0043228;GO:0043229;GO:0043232;GO:0044422;GO:0044424;GO:0044444;GO:0044449;GO:0044464;GO:0070161	REACT_20580;REACT_20649	9	7	7	33.5	31.3	31.3	41.714	49.147	36069000	136	-1.05816	-1.19801	-3.86993	-3.89509	-0.160742	-1.35957	-0.357866	-1.43276	-0.279959	-1.09523	0.937099	-1.20276	-0.321732	-1.64373	-1.53765	-3.23906	-0.074646	-1.26785	1.3652	-1.52936	-0.960224	-4.69693	-1.62436	-4.08996	-0.700248	-2.21397	1.0609	-4.29615	0.373409
+	9.29445	1.20784	P19823;CON__Q9TRI1	P19823	Inter-alpha-trypsin inhibitor heavy chain H2	ITIH2	GO:0005975;GO:0005976;GO:0006022;GO:0006807;GO:0008152;GO:0009308;GO:0010466;GO:0010951;GO:0019222;GO:0030203;GO:0030212;GO:0043086;GO:0043170;GO:0044092;GO:0044238;GO:0050789;GO:0050790;GO:0051336;GO:0051346;GO:0052547;GO:0052548;GO:0065007;GO:0065009	GO:0004857;GO:0004866;GO:0004867;GO:0030234;GO:0030414;GO:0061134;GO:0061135	GO:0005576;GO:0031982;GO:0031988;GO:0043226;GO:0043227;GO:0043230;GO:0044421;GO:0065010;GO:0070062;GO:0072562		30	30	29	45	45	45	106.46	323.31	1407900000	2376	2.28788	4.01521	2.57676	0.623884	4.30049	2.72455	3.99992	2.04768	3.64587	2.48724	3.57166	2.43325	2.08066	0.998463	4.16171	1.75378	2.33159	0.614353	3.9458	5.42899	1.78995	1.2875	2.63478	2.21902	2.19609	-1.49877	4.19646	2.04727	4.73644
+	8.53333	1.20737	P02790	P02790	Hemopexin	HPX	GO:0001932;GO:0001934;GO:0001959;GO:0001961;GO:0002637;GO:0002639;GO:0002682;GO:0002684;GO:0002697;GO:0002699;GO:0002700;GO:0002702;GO:0002703;GO:0002705;GO:0002706;GO:0002708;GO:0002712;GO:0002714;GO:0002819;GO:0002821;GO:0002822;GO:0002824;GO:0002889;GO:0002891;GO:0002920;GO:0002922;GO:0002923;GO:0002925;GO:0006778;GO:0006807;GO:0006810;GO:0006873;GO:0006875;GO:0006879;GO:0006897;GO:0006898;GO:…	GO:0005215;GO:0005488;GO:0015232;GO:0043167;GO:0043169;GO:0046872;GO:0051184	GO:0005576;GO:0005615;GO:0031974;GO:0031982;GO:0031983;GO:0031988;GO:0043226;GO:0043227;GO:0043230;GO:0043233;GO:0044421;GO:0044422;GO:0044424;GO:0044433;GO:0044444;GO:0044446;GO:0044464;GO:0060205;GO:0065010;GO:0070062;GO:0071682;GO:0072562	REACT_160163	33	33	31	70.1	70.1	66.7	51.676	323.31	4464600000	2392	5.06162	5.74754	4.89363	3.08403	6.1271	4.96677	6.70141	3.72619	5.65207	4.61065	5.97107	4.18708	3.97701	2.36953	5.21873	2.78145	3.62958	2.44739	5.30055	7.2675	4.99974	3.60505	4.76076	4.51901	4.54473	0.735781	6.38731	2.86683	6.46873
+	3.17791	1.20695	Q96M96	Q96M96	FYVE, RhoGEF and PH domain-containing protein 4	FGD4	GO:0006140;GO:0006996;GO:0007010;GO:0007165;GO:0007166;GO:0007167;GO:0007169;GO:0007264;GO:0008360;GO:0009894;GO:0009966;GO:0009987;GO:0010941;GO:0010942;GO:0016043;GO:0019219;GO:0019222;GO:0022603;GO:0022604;GO:0022607;GO:0023051;GO:0030029;GO:0030030;GO:0030031;GO:0030032;GO:0030035;GO:0030036;GO:0030811;GO:0031323;GO:0031329;GO:0033121;GO:0033124;GO:0035556;GO:0042981;GO:0043065;GO:0043067;GO:…	GO:0005083;GO:0005085;GO:0005088;GO:0005089;GO:0005488;GO:0005515;GO:0019899;GO:0030234;GO:0030695;GO:0031267;GO:0043167;GO:0043169;GO:0046872;GO:0051020;GO:0060589	GO:0001726;GO:0005737;GO:0005794;GO:0005829;GO:0005856;GO:0015629;GO:0030027;GO:0030175;GO:0042995;GO:0043226;GO:0043227;GO:0043228;GO:0043229;GO:0043231;GO:0043232;GO:0044424;GO:0044444;GO:0044464	REACT_11051;REACT_13638;REACT_18407	9	9	9	19.1	19.1	19.1	86.625	49.748	43064000	51	-0.338807	2.11486	-1.94774	-4.99941	1.97401	-3.70775	-2.71962	-5.12951	-4.12175	-4.62528	0.866896	-3.74672	-3.55684	-3.34413	-0.333364	-0.477901	0.0332699	0.435362	-0.287636	-4.61214	0.804171	-4.53833	-3.84859	1.71521	-0.439551	-4.56179	-0.772658	0.487837	1.3486
+	19.9942	1.19971	P07355;A6NMY6	P07355;A6NMY6	Annexin A2;Putative annexin A2-like protein	ANXA2;ANXA2P2	GO:0001525;GO:0001765;GO:0001932;GO:0001934;GO:0002090;GO:0002091;GO:0006461;GO:0006605;GO:0006810;GO:0006886;GO:0006900;GO:0006996;GO:0007589;GO:0008284;GO:0009892;GO:0009893;GO:0009894;GO:0009895;GO:0009966;GO:0009987;GO:0010469;GO:0010562;GO:0010604;GO:0010605;GO:0010638;GO:0015031;GO:0016043;GO:0016044;GO:0016050;GO:0019220;GO:0019222;GO:0022607;GO:0023051;GO:0030100;GO:0030193;GO:0030195;GO:…	GO:0004857;GO:0004859;GO:0005488;GO:0005509;GO:0005515;GO:0005543;GO:0005544;GO:0005546;GO:0008289;GO:0019834;GO:0030234;GO:0035091;GO:0043167;GO:0043169;GO:0046872;GO:0048306;GO:0055102	GO:0001726;GO:0005604;GO:0005615;GO:0005634;GO:0005765;GO:0005768;GO:0005769;GO:0005774;GO:0005811;GO:0005886;GO:0005938;GO:0009986;GO:0010008;GO:0016020;GO:0016023;GO:0016323;GO:0019897;GO:0019898;GO:0030496;GO:0031090;GO:0031410;GO:0031902;GO:0031982;GO:0031988;GO:0035749;GO:0042383;GO:0042470;GO:0042995;GO:0043220;GO:0043226;GO:0043227;GO:0043229;GO:0043230;GO:0043231;GO:0044352;GO:0044354;GO:…	REACT_17044;REACT_641	45	45	44	81.7	81.7	78.8	38.604	323.31	21106000000	5518	7.21518	6.56594	6.91786	4.42364	7.01948	4.99277	6.97391	5.96625	6.47006	4.5003	7.0726	5.36738	4.7192	4.83524	6.99944	5.35063	6.14577	5.56826	6.59334	5.31579	6.05909	4.84459	6.51876	5.64813	6.97359	4.45021	6.81564	4.97242	7.07864
+	5.08523	1.19901	O94788	O94788	Retinal dehydrogenase 2	ALDH1A2	GO:0001523;GO:0001568;GO:0001654;GO:0001822;GO:0001889;GO:0001936;GO:0002009;GO:0003002;GO:0003007;GO:0006081;GO:0006082;GO:0006629;GO:0006720;GO:0006721;GO:0006766;GO:0006775;GO:0006776;GO:0007154;GO:0007165;GO:0007389;GO:0007423;GO:0007494;GO:0007584;GO:0008152;GO:0008284;GO:0008285;GO:0008299;GO:0008610;GO:0009058;GO:0009110;GO:0009605;GO:0009653;GO:0009719;GO:0009725;GO:0009799;GO:0009855;GO:…	GO:0001758;GO:0003824;GO:0004028;GO:0004029;GO:0005488;GO:0005501;GO:0008289;GO:0016491;GO:0016620;GO:0016903;GO:0016918;GO:0019840;GO:0019842	GO:0005737;GO:0005829;GO:0044424;GO:0044444;GO:0044464;GO:0048471	REACT_268561	9	8	8	29	27.2	27.2	56.723	79.447	35393000	99	-2.49616	-3.29978	0.605305	-2.31614	-2.74928	-2.17512	-2.84809	-3.61658	-3.92741	-2.40332	-2.1634	-1.87341	-1.3039	-3.06733	-2.93251	-3.55456	-2.99141	-4.62879	-4.36284	-4.19049	-3.25957	-2.55942	-0.736444	-0.366727	0.454137	-5.82034	-1.12073	-5.31504	0.025156
+	6.08214	1.19891	P02647	P02647	Apolipoprotein A-I;Proapolipoprotein A-I;Truncated apolipoprotein A-I	APOA1	GO:0001523;GO:0001775;GO:0001817;GO:0001818;GO:0001932;GO:0001935;GO:0001959;GO:0001960;GO:0002576;GO:0002682;GO:0002697;GO:0002700;GO:0002718;GO:0002739;GO:0002740;GO:0006066;GO:0006464;GO:0006576;GO:0006629;GO:0006644;GO:0006650;GO:0006656;GO:0006694;GO:0006695;GO:0006720;GO:0006721;GO:0006807;GO:0006810;GO:0006869;GO:0006887;GO:0006897;GO:0006898;GO:0006928;GO:0006935;GO:0006950;GO:0007162;GO:…	GO:0001540;GO:0004857;GO:0005102;GO:0005215;GO:0005319;GO:0005488;GO:0005496;GO:0005515;GO:0005543;GO:0005548;GO:0008035;GO:0008047;GO:0008289;GO:0015248;GO:0015485;GO:0017127;GO:0019899;GO:0022892;GO:0030234;GO:0031210;GO:0032934;GO:0034190;GO:0034191;GO:0042802;GO:0043167;GO:0043169;GO:0043176;GO:0043178;GO:0045499;GO:0050997;GO:0055102;GO:0060228;GO:0070325;GO:0070653;GO:0071813;GO:0071814	GO:0005576;GO:0005615;GO:0005634;GO:0005768;GO:0005769;GO:0005788;GO:0005829;GO:0005886;GO:0009986;GO:0016020;GO:0016023;GO:0030139;GO:0031410;GO:0031974;GO:0031982;GO:0031983;GO:0031988;GO:0032991;GO:0032994;GO:0034358;GO:0034361;GO:0034364;GO:0034365;GO:0034366;GO:0034385;GO:0034774;GO:0042627;GO:0043226;GO:0043227;GO:0043229;GO:0043230;GO:0043231;GO:0043233;GO:0044421;GO:0044422;GO:0044424;GO:…	REACT_111158;REACT_116145;REACT_13621;REACT_160163;REACT_163679;REACT_163699;REACT_24968;REACT_318;REACT_6841;REACT_75925	41	41	40	79	79	79	30.777	323.31	21029000000	4771	6.49261	7.6553	6.24348	7.57471	7.49697	6.75718	7.52368	5.37905	7.31494	6.59146	6.72097	5.84541	5.27991	3.4286	6.67794	4.23388	4.47664	3.07099	6.825	8.60002	7.38804	6.80077	5.68363	4.54049	5.80528	2.20288	6.99683	3.79359	6.77491
+	9.39294	1.19722	O00534	O00534	von Willebrand factor A domain-containing protein 5A	VWA5A			GO:0005634;GO:0005654;GO:0043226;GO:0043227;GO:0043229;GO:0043231;GO:0044422;GO:0044424;GO:0044428;GO:0044446;GO:0044464		18	18	17	31.2	31.2	29.1	86.488	118.55	131790000	361	0.784785	-1.02151	0.782907	-1.1079	0.149664	0.389967	1.17765	-2.65704	0.285814	-4.14225	1.15664	0.398434	0.960142	-1.152	0.561115	0.255592	1.1364	-0.529873	0.594978	-1.03384	-0.462597	-1.25658	0.603949	1.08068	0.579549	-3.47134	0.902263	-1.59203	0.618727
+	7.69658	1.19409	P51178	P51178	1-phosphatidylinositol 4,5-bisphosphate phosphodiesterase delta-1	PLCD1	GO:0001525;GO:0001568;GO:0006629;GO:0006644;GO:0007165;GO:0008152;GO:0009056;GO:0009987;GO:0016042;GO:0019637;GO:0032502;GO:0035556;GO:0042127;GO:0043647;GO:0044237;GO:0044238;GO:0044255;GO:0044281;GO:0048513;GO:0048568;GO:0048646;GO:0048856;GO:0050789;GO:0050794;GO:0050896;GO:0051716;GO:0060674;GO:0060716;GO:0065007	GO:0001786;GO:0003824;GO:0004435;GO:0004620;GO:0004629;GO:0004871;GO:0005488;GO:0005509;GO:0005515;GO:0005543;GO:0008081;GO:0008289;GO:0016298;GO:0016787;GO:0016788;GO:0032794;GO:0042578;GO:0043167;GO:0043169;GO:0046872;GO:0060089;GO:0070300	GO:0005737;GO:0005829;GO:0005886;GO:0016020;GO:0031982;GO:0031988;GO:0043226;GO:0043227;GO:0043230;GO:0044421;GO:0044424;GO:0044444;GO:0044464;GO:0065010;GO:0070062	REACT_150312	16	16	15	37	37	36	85.664	268.42	63774000	171	0.286553	0.806726	0.183239	-1.21035	-1.07826	-2.65683	-0.608021	-1.70885	-0.438471	-2.16946	0.275021	-2.26893	-1.39833	-0.765875	-0.936121	0.195896	0.465174	-2.93581	-0.357784	-1.69486	-1.57242	-1.66147	0.238791	-3.48517	0.440076	-3.47663	-0.933585	-2.56017	0.42252
+	2.79213	1.19156	Q8TD06	Q8TD06	Anterior gradient protein 3 homolog	AGR3		GO:0001948;GO:0002162;GO:0005488;GO:0005515	GO:0005576		11	10	9	65.7	59	47.6	19.171	323.31	329770000	384	3.09758	-3.39969	2.53383	3.81263	2.03766	3.98513	1.34464	-2.85496	1.65875	-4.19108	1.4411	-2.49133	3.04924	-5.22282	1.73041	1.14276	2.12215	-1.57367	-0.0623093	-0.317817	2.08527	2.13423	2.55837	3.56721	1.24746	-3.94788	1.50969	-1.83721	2.39847
+	6.54634	1.18908	O95340	O95340	Bifunctional 3-phosphoadenosine 5-phosphosulfate synthase 2;Sulfate adenylyltransferase;Adenylyl-sulfate kinase	PAPSS2	GO:0000103;GO:0001501;GO:0005975;GO:0005976;GO:0006022;GO:0006139;GO:0006163;GO:0006753;GO:0006790;GO:0006805;GO:0006807;GO:0007596;GO:0007599;GO:0008152;GO:0009058;GO:0009117;GO:0009165;GO:0009308;GO:0009987;GO:0030203;GO:0032501;GO:0032502;GO:0033865;GO:0033866;GO:0033875;GO:0034030;GO:0034032;GO:0034033;GO:0034035;GO:0034036;GO:0034641;GO:0034654;GO:0043170;GO:0044237;GO:0044238;GO:0044249;GO:…	GO:0000166;GO:0003824;GO:0004020;GO:0004779;GO:0004781;GO:0005488;GO:0005524;GO:0016301;GO:0016740;GO:0016772;GO:0016773;GO:0016779;GO:0017076;GO:0030554;GO:0032553;GO:0032555;GO:0032559;GO:0035639;GO:0070566	GO:0005829;GO:0044424;GO:0044444;GO:0044464	REACT_268843;REACT_6840	30	30	26	65.5	65.5	51	69.5	148.28	199170000	493	0.505702	-1.37676	0.304365	-2.59207	-1.53939	-1.33384	-1.04505	-2.2211	-0.278133	-4.03702	0.553949	-1.43941	0.592211	-0.528738	1.93137	0.56233	2.1765	0.000883102	1.99522	-1.84552	-0.47555	0.318428	0.382059	0.779084	1.07383	-3.28327	0.569514	-1.05035	1.72064
+	8.3843	1.18811	P04217	P04217	Alpha-1B-glycoprotein	A1BG			GO:0005576;GO:0005615;GO:0031982;GO:0031988;GO:0043226;GO:0043227;GO:0043230;GO:0044421;GO:0065010;GO:0070062;GO:0072562		17	17	16	56	56	54.5	54.253	323.31	1332700000	1352	3.3829	3.8581	2.93001	2.76996	4.21431	3.26091	4.66132	1.84214	3.96962	3.08496	4.07962	3.06556	2.44155	0.249592	3.22153	0.662283	2.09615	0.548973	3.44352	5.20367	3.43884	2.42108	3.0833	2.55933	2.98762	-0.619833	4.57061	1.46875	4.51843
+	4.62532	1.18462	P43353;P48448	P43353	Aldehyde dehydrogenase family 3 member B1	ALDH3B1	GO:0006066;GO:0006067;GO:0006068;GO:0006081;GO:0006629;GO:0006950;GO:0006979;GO:0008152;GO:0009056;GO:0009987;GO:0033554;GO:0034308;GO:0034310;GO:0034599;GO:0042221;GO:0044237;GO:0044238;GO:0044248;GO:0044281;GO:0044282;GO:0046164;GO:0046185;GO:0050896;GO:0051716;GO:0055114;GO:0070887	GO:0003824;GO:0004028;GO:0004030;GO:0016491;GO:0016620;GO:0016903	GO:0005737;GO:0005829;GO:0005886;GO:0016020;GO:0031982;GO:0031988;GO:0043226;GO:0043227;GO:0043230;GO:0044421;GO:0044424;GO:0044444;GO:0044464;GO:0065010;GO:0070062		9	8	7	28.6	26.1	19.2	51.839	33.539	29889000	73	-1.49829	-3.18508	-1.70037	-1.86352	-3.7057	-3.56518	-3.40437	-3.40607	-1.13083	-5.15904	-2.12189	-3.76842	-2.94076	-4.6685	-1.99701	-3.77814	-2.48583	-2.48056	-3.90884	1.62218	-1.36341	-3.15373	0.460583	-3.92596	0.745067	-5.52654	-2.53904	-4.72403	-3.4671
+	2.81927	1.18385	P15428	P15428	15-hydroxyprostaglandin dehydrogenase [NAD(+)]	HPGD	GO:0000038;GO:0006082;GO:0006629;GO:0006631;GO:0006690;GO:0006692;GO:0006693;GO:0007165;GO:0007166;GO:0007167;GO:0007178;GO:0007179;GO:0007186;GO:0007565;GO:0007567;GO:0008152;GO:0009653;GO:0009987;GO:0019369;GO:0019371;GO:0019372;GO:0019752;GO:0022414;GO:0030728;GO:0032501;GO:0032502;GO:0032787;GO:0033559;GO:0042180;GO:0043436;GO:0044237;GO:0044238;GO:0044255;GO:0044281;GO:0045786;GO:0048514;GO:…	GO:0000166;GO:0003824;GO:0004871;GO:0004872;GO:0004888;GO:0004930;GO:0004953;GO:0004954;GO:0004955;GO:0004957;GO:0005488;GO:0005515;GO:0016404;GO:0016491;GO:0016614;GO:0016616;GO:0038023;GO:0042802;GO:0042803;GO:0046983;GO:0048037;GO:0050662;GO:0051287;GO:0060089;GO:0070403	GO:0005829;GO:0016323;GO:0031982;GO:0031988;GO:0043226;GO:0043227;GO:0043230;GO:0044421;GO:0044424;GO:0044425;GO:0044444;GO:0044459;GO:0044464;GO:0065010;GO:0070062	REACT_150149;REACT_150320	15	15	10	85	85	54.9	28.977	141.62	97973000	124	0.996404	-1.90295	-0.684755	-0.678724	-1.40223	-3.58404	-1.82244	-2.76186	1.3424	-2.67929	1.00634	-2.30559	-1.72689	-0.173887	2.67514	-3.84131	-1.4156	-3.96915	-0.510967	-1.00213	-2.5164	4.9384	-2.50946	-3.22497	-1.99566	-4.53667	-1.03212	-2.75431	1.19497
+	8.78039	1.17997	P60903	P60903	Protein S100-A10	S100A10	GO:0001765;GO:0001952;GO:0001954;GO:0006140;GO:0006461;GO:0006900;GO:0006996;GO:0009894;GO:0009987;GO:0010638;GO:0010810;GO:0010811;GO:0016043;GO:0016044;GO:0016050;GO:0019219;GO:0019222;GO:0022607;GO:0030155;GO:0030811;GO:0031323;GO:0031329;GO:0031579;GO:0032231;GO:0032233;GO:0032956;GO:0032970;GO:0033043;GO:0033121;GO:0033124;GO:0043085;GO:0043087;GO:0043547;GO:0043933;GO:0044087;GO:0044093;GO:…	GO:0005488;GO:0005509;GO:0005515;GO:0042802;GO:0042803;GO:0043167;GO:0043169;GO:0044325;GO:0046872;GO:0046983	GO:0019897;GO:0019898;GO:0031982;GO:0031988;GO:0043226;GO:0043227;GO:0043230;GO:0044421;GO:0044425;GO:0044459;GO:0044464;GO:0065010;GO:0070062	REACT_641	15	15	14	94.8	94.8	94.8	11.203	323.31	4296300000	1536	7.23757	5.3304	6.05927	6.88957	6.05781	5.00175	5.97476	5.40399	5.60916	5.29079	6.71543	4.73183	3.09224	3.1693	5.59901	3.54335	4.54871	3.50324	4.87394	3.71463	8.05054	6.52565	5.966	4.33063	5.38906	2.96477	4.63942	3.35208	5.82847
+	6.11531	1.17901	P02652	P02652	Apolipoprotein A-II;Proapolipoprotein A-II;Truncated apolipoprotein A-II	APOA2	GO:0001523;GO:0001817;GO:0002526;GO:0002682;GO:0002697;GO:0002700;GO:0002718;GO:0002739;GO:0002740;GO:0006066;GO:0006457;GO:0006464;GO:0006576;GO:0006629;GO:0006638;GO:0006639;GO:0006641;GO:0006644;GO:0006650;GO:0006656;GO:0006662;GO:0006720;GO:0006721;GO:0006807;GO:0006810;GO:0006869;GO:0006950;GO:0006952;GO:0006954;GO:0007165;GO:0007602;GO:0007603;GO:0008152;GO:0008202;GO:0008203;GO:0008610;GO:…	GO:0004857;GO:0005102;GO:0005215;GO:0005319;GO:0005488;GO:0005496;GO:0005515;GO:0005543;GO:0008035;GO:0008047;GO:0008289;GO:0015248;GO:0015485;GO:0017127;GO:0022892;GO:0030234;GO:0031210;GO:0032934;GO:0034190;GO:0042802;GO:0042803;GO:0043167;GO:0043169;GO:0043176;GO:0043178;GO:0046982;GO:0046983;GO:0050997;GO:0055102;GO:0060228;GO:0070325;GO:0070653;GO:0071813;GO:0071814	GO:0005576;GO:0005768;GO:0005769;GO:0005788;GO:0005829;GO:0031974;GO:0031982;GO:0031988;GO:0032991;GO:0032994;GO:0034358;GO:0034361;GO:0034364;GO:0034366;GO:0034385;GO:0042627;GO:0043226;GO:0043227;GO:0043229;GO:0043230;GO:0043231;GO:0043233;GO:0044421;GO:0044422;GO:0044424;GO:0044432;GO:0044444;GO:0044446;GO:0044464;GO:0065010;GO:0070013;GO:0070062;GO:0072562	REACT_116145;REACT_24968;REACT_6841	10	10	10	77	77	77	11.175	323.31	3983900000	1256	5.67032	6.6168	5.94141	7.18264	6.90256	6.20958	7.11966	4.38071	6.10888	6.36721	6.0091	3.45588	4.36281	2.59339	5.99154	3.42692	4.5761	2.34173	5.97817	7.58434	6.93048	6.66051	5.54223	4.28822	5.15604	1.8988	6.56398	4.19043	6.23816
+	12.8858	1.17817	Q9UEY8	Q9UEY8	Gamma-adducin	ADD3	GO:0006810;GO:0009987;GO:0051234;GO:0055085	GO:0005198;GO:0005200	GO:0000228;GO:0000793;GO:0000794;GO:0005654;GO:0005694;GO:0005737;GO:0005829;GO:0005856;GO:0005886;GO:0005911;GO:0005938;GO:0016020;GO:0030054;GO:0043226;GO:0043228;GO:0043229;GO:0043232;GO:0044422;GO:0044424;GO:0044428;GO:0044444;GO:0044446;GO:0044464	REACT_268444	23	23	21	36	36	35.8	79.154	159.15	213040000	684	1.0614	0.439375	1.39079	-2.68181	1.41162	-1.6461	1.1179	0.240563	-1.07643	-3.19463	1.45367	0.725866	0.160189	0.657566	1.43121	0.070015	0.888096	0.86697	0.71199	-1.33628	-0.799402	-0.938215	0.784966	0.237453	0.915988	-0.359846	1.05661	-1.46022	1.50075
+	10.5172	1.17664	P30043	P30043	Flavin reductase (NADPH)	BLVRB	GO:0006778;GO:0006787;GO:0006807;GO:0008152;GO:0009056;GO:0009987;GO:0033013;GO:0033015;GO:0034641;GO:0042167;GO:0042168;GO:0042440;GO:0044237;GO:0044248;GO:0044270;GO:0044281;GO:0046149;GO:0046483;GO:0046700;GO:0051186;GO:0051187	GO:0003824;GO:0004074;GO:0016491;GO:0016627;GO:0016628;GO:0016645;GO:0016646;GO:0042602	GO:0005654;GO:0005737;GO:0005829;GO:0005886;GO:0016020;GO:0031982;GO:0031988;GO:0043226;GO:0043227;GO:0043230;GO:0044421;GO:0044422;GO:0044424;GO:0044428;GO:0044444;GO:0044446;GO:0044464;GO:0065010;GO:0070062	REACT_22297	19	19	17	87.4	87.4	82.5	22.119	323.31	2805400000	2108	3.95571	4.5473	4.06372	5.11663	5.637	4.15936	5.55322	4.21935	6.0083	3.36958	4.5549	3.72927	2.97393	1.51761	4.88173	2.50315	3.07299	2.08266	5.2277	6.67811	4.95374	3.64109	3.60465	4.19321	4.30703	3.49743	5.1257	2.8663	4.41183
+	11.616	1.17632	Q9H792	Q9H792	Pseudopodium-enriched atypical kinase 1	PEAK1	GO:0000902;GO:0000904;GO:0006464;GO:0006468;GO:0006793;GO:0006796;GO:0006928;GO:0007155;GO:0008152;GO:0009653;GO:0009987;GO:0016043;GO:0016310;GO:0016477;GO:0018108;GO:0018193;GO:0018212;GO:0019538;GO:0022610;GO:0031589;GO:0032502;GO:0032989;GO:0034446;GO:0040011;GO:0043170;GO:0043412;GO:0044237;GO:0044238;GO:0044260;GO:0044267;GO:0046777;GO:0048869;GO:0048870;GO:0071840	GO:0000166;GO:0003824;GO:0004672;GO:0004713;GO:0004715;GO:0005488;GO:0005524;GO:0016301;GO:0016740;GO:0016772;GO:0016773;GO:0017076;GO:0030554;GO:0032553;GO:0032555;GO:0032559;GO:0035639	GO:0005654;GO:0005737;GO:0005856;GO:0005886;GO:0005912;GO:0005924;GO:0005925;GO:0015629;GO:0016020;GO:0030054;GO:0030055;GO:0043226;GO:0043228;GO:0043229;GO:0043232;GO:0044422;GO:0044424;GO:0044428;GO:0044446;GO:0044464;GO:0070161		3	3	3	2.4	2.4	2.4	193.1	39.295	6732100	85	-3.19472	-3.66322	-3.1789	-3.8472	-3.95067	-4.97297	-4.08453	-4.31407	-3.7661	-3.96263	-2.17369	-4.12564	-3.8105	-5.28082	-2.92531	-4.20997	-2.16464	-3.96191	-3.62138	-4.46826	-0.242542	-4.23934	-1.72553	-3.93502	-3.78406	-4.29719	-3.11312	-3.72338	-3.16455
+	7.2764	1.17157	P01031;CON__Q1A7A4	P01031	Complement C5;Complement C5 beta chain;Complement C5 alpha chain;C5a anaphylatoxin;Complement C5 alpha chain	C5	GO:0000187;GO:0001701;GO:0001817;GO:0001819;GO:0001932;GO:0002252;GO:0002253;GO:0002376;GO:0002523;GO:0002673;GO:0002682;GO:0002683;GO:0002684;GO:0002685;GO:0002686;GO:0002688;GO:0002689;GO:0002697;GO:0002920;GO:0006464;GO:0006468;GO:0006793;GO:0006796;GO:0006873;GO:0006874;GO:0006875;GO:0006928;GO:0006935;GO:0006950;GO:0006952;GO:0006954;GO:0006955;GO:0006956;GO:0006957;GO:0006958;GO:0006959;GO:…	GO:0001664;GO:0004857;GO:0004866;GO:0005102;GO:0005125;GO:0005126;GO:0005488;GO:0005515;GO:0008009;GO:0030234;GO:0030414;GO:0042379;GO:0061134;GO:0061135	GO:0005576;GO:0005579;GO:0005615;GO:0031982;GO:0031988;GO:0032991;GO:0043226;GO:0043227;GO:0043230;GO:0043234;GO:0044421;GO:0044425;GO:0044459;GO:0044464;GO:0046930;GO:0065010;GO:0070062	REACT_118707;REACT_14819;REACT_19231;REACT_7972;REACT_8028	56	56	53	51.6	51.6	50.2	188.3	323.31	497710000	1385	-0.379123	3.49498	0.468662	-2.79527	1.49467	-0.507025	1.51225	-0.840121	0.778223	-0.146508	1.51617	0.657495	0.605406	-0.630682	1.853	-0.232521	0.576254	-1.21285	2.29312	4.83304	0.374239	-2.08786	0.603983	-0.151004	0.690883	-2.72601	2.56828	0.277718	3.02362
+	9.01937	1.17095	Q9ULC3	Q9ULC3	Ras-related protein Rab-23	RAB23	GO:0000045;GO:0003002;GO:0006810;GO:0006950;GO:0006952;GO:0006968;GO:0006996;GO:0007033;GO:0007165;GO:0007264;GO:0007265;GO:0007389;GO:0008589;GO:0009653;GO:0009892;GO:0009953;GO:0009966;GO:0009987;GO:0010605;GO:0010927;GO:0015031;GO:0016043;GO:0019222;GO:0021513;GO:0022607;GO:0023051;GO:0030030;GO:0030031;GO:0030162;GO:0031323;GO:0031324;GO:0032268;GO:0032269;GO:0032386;GO:0032387;GO:0032482;GO:…	GO:0000166;GO:0003824;GO:0003924;GO:0005488;GO:0005525;GO:0016462;GO:0016787;GO:0016817;GO:0016818;GO:0017076;GO:0017111;GO:0019001;GO:0032553;GO:0032555;GO:0032561;GO:0035639	GO:0005737;GO:0005773;GO:0005776;GO:0005886;GO:0010008;GO:0012506;GO:0016020;GO:0016023;GO:0030139;GO:0030659;GO:0030666;GO:0030670;GO:0031090;GO:0031410;GO:0031982;GO:0031988;GO:0043226;GO:0043227;GO:0043229;GO:0043230;GO:0043231;GO:0044421;GO:0044422;GO:0044424;GO:0044433;GO:0044440;GO:0044444;GO:0044446;GO:0044464;GO:0045335;GO:0065010;GO:0070062		9	9	9	44.3	44.3	44.3	26.659	82.094	50144000	202	-0.138732	-0.934683	-0.936485	-4.60715	-1.36237	-2.04503	-0.998472	-2.77085	-1.17737	-3.00057	0.0392628	-1.94217	-2.55962	-0.41448	0.0210075	-2.39823	-0.181643	-2.73129	-0.896378	-1.60136	0.0484028	-2.60486	0.051096	-0.318946	-0.439803	-3.89422	-0.43431	-1.10389	0.0312347
+	6.10573	1.16971	Q16625	Q16625	Occludin	OCLN	GO:0006082;GO:0006139;GO:0006461;GO:0006520;GO:0006575;GO:0006732;GO:0006790;GO:0006807;GO:0006915;GO:0006921;GO:0007043;GO:0008152;GO:0008219;GO:0009116;GO:0009119;GO:0009308;GO:0009987;GO:0012501;GO:0016043;GO:0016265;GO:0019752;GO:0022411;GO:0022607;GO:0034329;GO:0034330;GO:0034641;GO:0042180;GO:0042278;GO:0043436;GO:0043933;GO:0044106;GO:0044237;GO:0044238;GO:0044281;GO:0045216;GO:0046128;GO:…	GO:0003824;GO:0005488;GO:0005515;GO:0008119;GO:0008168;GO:0008172;GO:0008757;GO:0016740;GO:0016741;GO:0019904	GO:0005829;GO:0005886;GO:0005911;GO:0005923;GO:0016020;GO:0016021;GO:0016023;GO:0016324;GO:0016327;GO:0030054;GO:0030139;GO:0031224;GO:0031410;GO:0031982;GO:0031988;GO:0043226;GO:0043227;GO:0043229;GO:0043231;GO:0044424;GO:0044425;GO:0044444;GO:0044459;GO:0044464;GO:0070160	REACT_13579	10	10	10	26.6	26.6	26.6	59.143	81.253	127200000	313	0.985467	-1.30227	0.224491	2.29172	-1.49981	1.97147	-0.0861797	-3.02868	-0.578762	0.174499	0.324209	-3.68964	-0.982983	-1.2888	1.11124	0.21229	0.562742	-2.95521	-0.0206547	-0.914882	1.31233	0.935228	0.196487	1.06017	0.967807	-4.03241	0.842807	-4.24849	1.09627
+	3.01159	1.16763	Q92954	Q92954	Proteoglycan 4;Proteoglycan 4 C-terminal part	PRG4	GO:0001817;GO:0002376;GO:0006955;GO:0008283;GO:0009889;GO:0009890;GO:0009892;GO:0010556;GO:0010558;GO:0010605;GO:0019222;GO:0031323;GO:0031324;GO:0031326;GO:0031327;GO:0032675;GO:0042035;GO:0042036;GO:0042127;GO:0045408;GO:0045409;GO:0048519;GO:0048523;GO:0050789;GO:0050794;GO:0050896;GO:0051239;GO:0051246;GO:0051248;GO:0060255;GO:0065007;GO:0071425;GO:0080090	GO:0001871;GO:0004872;GO:0005044;GO:0005488;GO:0030246;GO:0030247;GO:0038024	GO:0005615;GO:0044421		7	7	7	8	8	8	151.06	25.557	37195000	55	-3.74156	-0.787754	-2.3239	-5.32772	-0.161924	-2.4168	-1.72599	-3.41985	-0.751694	-3.61629	-2.38124	-4.77612	-1.57998	-2.46764	-0.075285	-1.45164	1.02925	-4.68543	2.37801	-3.38757	-5.24416	-3.76335	-0.461996	-3.67247	-1.99004	-3.78854	-2.11002	-1.44349	-1.55741
+	11.8835	1.16555	P05091	P05091	Aldehyde dehydrogenase, mitochondrial	ALDH2	GO:0001505;GO:0005975;GO:0006066;GO:0006067;GO:0006068;GO:0006069;GO:0006805;GO:0007154;GO:0007267;GO:0007268;GO:0008152;GO:0009056;GO:0009058;GO:0009987;GO:0023052;GO:0034308;GO:0034310;GO:0042133;GO:0042136;GO:0044237;GO:0044238;GO:0044249;GO:0044281;GO:0044282;GO:0046164;GO:0055114;GO:0065007;GO:0065008	GO:0003824;GO:0004029;GO:0004030;GO:0009055;GO:0016491;GO:0016620;GO:0016903	GO:0005759;GO:0031974;GO:0031982;GO:0031988;GO:0043226;GO:0043227;GO:0043230;GO:0043233;GO:0044421;GO:0044422;GO:0044424;GO:0044429;GO:0044444;GO:0044446;GO:0044464;GO:0065010;GO:0070013;GO:0070062	REACT_15532;REACT_34	35	34	33	75	73.7	73.1	56.381	323.31	2134400000	2255	2.88034	0.966837	3.56742	1.38945	2.74425	1.96515	3.10382	0.62165	3.00088	1.00104	3.37525	1.58067	2.9856	1.85971	3.46472	2.98652	3.99018	1.48524	3.74422	1.41416	3.38479	2.29749	3.71591	3.35353	4.39547	0.252613	3.77199	1.76856	3.04512
+	9.33674	1.16439	Q9Y4F1	Q9Y4F1	FERM, RhoGEF and pleckstrin domain-containing protein 1	FARP1	GO:0006140;GO:0007416;GO:0009653;GO:0009894;GO:0009987;GO:0010921;GO:0010923;GO:0016043;GO:0019219;GO:0019220;GO:0019222;GO:0022607;GO:0030030;GO:0030811;GO:0031323;GO:0031329;GO:0032502;GO:0032989;GO:0032990;GO:0033121;GO:0033124;GO:0035303;GO:0043085;GO:0043086;GO:0043087;GO:0043547;GO:0044092;GO:0044093;GO:0048812;GO:0048813;GO:0048858;GO:0048869;GO:0050789;GO:0050790;GO:0050794;GO:0050808;GO:…	GO:0005083;GO:0005085;GO:0005088;GO:0005089;GO:0030234;GO:0030676;GO:0030695;GO:0060589	GO:0005737;GO:0005829;GO:0005856;GO:0019897;GO:0019898;GO:0030054;GO:0030175;GO:0030425;GO:0031234;GO:0042995;GO:0043005;GO:0043197;GO:0043226;GO:0043228;GO:0043229;GO:0043232;GO:0044309;GO:0044424;GO:0044425;GO:0044444;GO:0044459;GO:0044463;GO:0044464;GO:0045202		19	19	17	29.2	29.2	23.3	118.63	120.76	78918000	275	0.48446	-3.46063	-0.566647	-1.71496	-1.61057	-1.73156	-1.49867	-2.82353	-0.575151	-3.3454	-0.477566	-2.86257	-1.37605	-0.704599	0.555798	-0.840237	0.0152493	-0.926491	-0.838278	-2.1946	1.23538	-1.73056	0.458534	-1.23928	0.087184	-4.4609	-0.960448	-2.90141	-0.251507
+	8.00643	1.16197	P48059	P48059	LIM and senescent cell antigen-like-containing domain protein 1	LIMS1	GO:0001952;GO:0001954;GO:0006140;GO:0006355;GO:0007568;GO:0007569;GO:0009719;GO:0009889;GO:0009890;GO:0009892;GO:0009893;GO:0009894;GO:0009987;GO:0010033;GO:0010468;GO:0010556;GO:0010558;GO:0010604;GO:0010605;GO:0010628;GO:0010629;GO:0010810;GO:0010811;GO:0016043;GO:0019219;GO:0019222;GO:0022607;GO:0030155;GO:0030811;GO:0031323;GO:0031324;GO:0031326;GO:0031327;GO:0031329;GO:0032502;GO:0033121;GO:…	GO:0005488;GO:0005515;GO:0008270;GO:0019899;GO:0019900;GO:0019901;GO:0043167;GO:0043169;GO:0046872;GO:0046914	GO:0005829;GO:0005886;GO:0005911;GO:0005912;GO:0005924;GO:0005925;GO:0016020;GO:0030054;GO:0030055;GO:0044424;GO:0044444;GO:0044464;GO:0048471;GO:0070161	REACT_20580;REACT_20649	9	9	4	34.2	34.2	16	37.251	30.941	162280000	351	0.889405	-5.17377	0.506021	-1.56482	0.33954	-1.73826	0.809624	-2.67233	-0.235458	-1.90309	0.777376	-0.538462	0.228573	-1.908	-0.417437	0.291927	1.32455	-0.362701	1.5624	-1.38738	-0.300848	-1.33617	1.21999	0.706201	1.18759	-1.72683	-0.520524	-1.05511	1.07286
+	8.96831	1.14951	P01042	P01042	Kininogen-1;Kininogen-1 heavy chain;T-kinin;Bradykinin;Lysyl-bradykinin;Kininogen-1 light chain;Low molecular weight growth-promoting factor	KNG1	GO:0001775;GO:0002576;GO:0003008;GO:0003012;GO:0003013;GO:0003014;GO:0003018;GO:0006810;GO:0006873;GO:0006874;GO:0006875;GO:0006887;GO:0006936;GO:0006939;GO:0006950;GO:0006952;GO:0006954;GO:0007162;GO:0007204;GO:0007596;GO:0007597;GO:0007599;GO:0008152;GO:0009611;GO:0009892;GO:0009987;GO:0010466;GO:0010605;GO:0010941;GO:0010942;GO:0010951;GO:0016192;GO:0019222;GO:0019538;GO:0019725;GO:0030003;GO:…	GO:0001871;GO:0004857;GO:0004866;GO:0004869;GO:0005102;GO:0005488;GO:0005515;GO:0005539;GO:0008201;GO:0008270;GO:0030234;GO:0030246;GO:0030247;GO:0030414;GO:0043167;GO:0043169;GO:0046872;GO:0046914;GO:0061134;GO:0061135	GO:0005576;GO:0005615;GO:0005886;GO:0016020;GO:0031093;GO:0031974;GO:0031982;GO:0031983;GO:0031988;GO:0034774;GO:0043226;GO:0043227;GO:0043230;GO:0043233;GO:0044421;GO:0044422;GO:0044424;GO:0044433;GO:0044444;GO:0044446;GO:0044464;GO:0060205;GO:0065010;GO:0070062;GO:0072562	REACT_14819;REACT_18283;REACT_19231;REACT_318;REACT_326	28	28	26	36.3	36.3	36.2	71.957	323.31	970790000	1313	2.45936	3.94601	2.70336	2.29027	3.82113	2.74067	3.72803	1.59108	3.55995	2.25276	3.41694	1.54269	1.94479	0.428194	2.83956	0.511559	1.60332	-0.555117	3.06196	4.9332	4.05323	1.65748	3.3584	1.95954	2.39048	-0.977753	3.44269	1.24603	3.9887
+	3.16802	1.14863	P08493	P08493	Matrix Gla protein	MGP	GO:0001502;GO:0001503;GO:0007155;GO:0009987;GO:0016337;GO:0022610;GO:0030154;GO:0030278;GO:0030500;GO:0032501;GO:0032502;GO:0048869;GO:0050789;GO:0050793;GO:0051239;GO:0065007;GO:0070167;GO:2000026	GO:0005198;GO:0005201;GO:0005488;GO:0005509;GO:0008147;GO:0043167;GO:0043169;GO:0046872	GO:0005578;GO:0031012;GO:0031982;GO:0031988;GO:0043226;GO:0043227;GO:0043230;GO:0044421;GO:0065010;GO:0070062		2	2	2	23.3	23.3	23.3	12.353	19.927	134370000	250	1.66255	-1.00351	0.223698	-2.33306	-2.08292	-0.591156	1.07012	-3.76525	-0.130619	-1.33142	-0.204845	-0.270142	-0.532852	-2.4247	0.883635	1.03724	2.44044	-2.36741	2.49357	1.63867	-2.12202	-0.152363	1.14882	-1.45384	2.14794	-3.40613	1.07704	-2.53619	1.82701
+	5.36774	1.14787	P79483	P79483	HLA class II histocompatibility antigen, DR beta 3 chain	HLA-DRB3	GO:0002253;GO:0002376;GO:0002429;GO:0002478;GO:0002495;GO:0002504;GO:0002682;GO:0002684;GO:0002694;GO:0002696;GO:0002757;GO:0002764;GO:0002768;GO:0007165;GO:0007166;GO:0009987;GO:0010033;GO:0019221;GO:0019882;GO:0019884;GO:0019886;GO:0031294;GO:0031295;GO:0034097;GO:0034341;GO:0042221;GO:0048002;GO:0048518;GO:0048522;GO:0048583;GO:0048584;GO:0050776;GO:0050778;GO:0050789;GO:0050794;GO:0050851;GO:…	GO:0003823;GO:0004871;GO:0004872;GO:0004888;GO:0005488;GO:0032395;GO:0038023;GO:0042277;GO:0042605;GO:0060089	GO:0000139;GO:0005765;GO:0005774;GO:0005886;GO:0005887;GO:0010008;GO:0012506;GO:0012507;GO:0016020;GO:0016021;GO:0030176;GO:0030658;GO:0030659;GO:0030662;GO:0030665;GO:0030666;GO:0030669;GO:0031090;GO:0031224;GO:0031226;GO:0031227;GO:0031300;GO:0031301;GO:0031902;GO:0032588;GO:0032991;GO:0042611;GO:0042613;GO:0043234;GO:0044422;GO:0044424;GO:0044425;GO:0044431;GO:0044432;GO:0044433;GO:0044437;GO:…	REACT_121399;REACT_12555;REACT_12582;REACT_12596;REACT_12623;REACT_19324;REACT_25078	16	16	9	59.4	59.4	21.8	29.962	323.31	571310000	595	2.8204	0.989573	3.45676	2.42614	2.36538	3.4516	3.29223	0.0571775	3.40807	2.00189	3.17342	2.62174	3.17446	-0.485222	2.73792	1.05512	2.65108	-0.349972	2.38374	1.03995	0.882248	2.46674	2.79286	2.75603	4.07023	-1.10834	4.62303	-2.63356	2.50275
+	8.36031	1.14166	O60861	O60861	Growth arrest-specific protein 7	GAS7	GO:0006355;GO:0006461;GO:0006996;GO:0007010;GO:0007015;GO:0007050;GO:0008154;GO:0008360;GO:0009653;GO:0009889;GO:0009987;GO:0010468;GO:0010556;GO:0016043;GO:0019219;GO:0019222;GO:0022402;GO:0022603;GO:0022604;GO:0022607;GO:0030029;GO:0030030;GO:0030036;GO:0030041;GO:0031323;GO:0031326;GO:0032502;GO:0032989;GO:0032990;GO:0034621;GO:0034622;GO:0043623;GO:0043933;GO:0045786;GO:0048519;GO:0048523;GO:…	GO:0001071;GO:0003700	GO:0001726;GO:0005737;GO:0005884;GO:0032991;GO:0042995;GO:0043234;GO:0044422;GO:0044424;GO:0044430;GO:0044446;GO:0044464		7	7	7	19.5	19.5	19.5	54.371	55.039	21870000	102	-0.156306	-4.62081	-1.69093	-3.07513	-0.0838528	-3.15692	-1.18352	-4.37686	-0.929405	-2.85149	-0.617643	-1.50581	-1.77589	-2.61897	-1.83986	-3.73121	-1.14005	-3.00552	-2.09748	-4.37807	-1.26639	-4.98289	0.0245171	-0.772067	-2.16254	-3.67151	-2.255	-3.09598	-2.98039
[truncated: 4,143 more rows]
[truncated: 111 more columns]
